# Supplementary material for: An Intronic Signal for Alternative Splicing in the Human Genome
Source: PLOS journal article supplement (doi:10.1371/journal.pone.0001246), 2007-11-27
Supplement: S1 (10.1371/journal.pone.0001246.s001) [file journal.pone.0001246.s001.pdf › journal.pone.0001246.s001.pdf]

In100 candidate1 (in intron):

LOCUS ENSG00000099715

DESCRIPTION Protocadherin-11 Y-linked precursor (Protocadherin-11)  
(Protocadherin- 22) (Protocadherin on the Y chromosome) (PCDH-Y) (Protocadherin  
prosate cancer) (Protocadherin-PC). [Source:Uniprot/SWISSPROT;Acc:Q9BZA8]

TTATTAGATTTTTTTTCCTATAGAGTTGTTTAACCTCCTCATATGTTCTGGTTATTAATCCTTTATCAGATGTGTAGCTT  
TTAAATATTTTCTCCCATTC

In100 candidate2 (in intron):

LOCUS ENSG00000099715

DESCRIPTION Protocadherin-11 Y-linked precursor (Protocadherin-11)  
(Protocadherin- 22) (Protocadherin on the Y chromosome) (PCDH-Y) (Protocadherin  
prosate cancer) (Protocadherin-PC). [Source:Uniprot/SWISSPROT;Acc:Q9BZA8]

ATATTCGTTCTTCCAATTCATTAACATGGAATGTCTTTCCATTTTTGTGTCCTCTACAGTTTTTCCAGCACTGTTTTAT  
AATGTTTCATTGTCTTGATTT

In100 candidate3 (in intron):

LOCUS ENSG00000099715

DESCRIPTION Protocadherin-11 Y-linked precursor (Protocadherin-11)  
(Protocadherin- 22) (Protocadherin on the Y chromosome) (PCDH-Y) (Protocadherin  
prosate cancer) (Protocadherin-PC). [Source:Uniprot/SWISSPROT;Acc:Q9BZA8]

AGTAAGTTTACAAGTAACTTAAATGTGAGACTTTTTACTTTATTCTTCTTTCAAGATTGTTTTCACTATTGCAGTTCTC  
TTGAAATTCCATATGTTTTT

In100 candidate4 (in intron):

LOCUS ENSG00000099715

DESCRIPTION Protocadherin-11 Y-linked precursor (Protocadherin-11)

(Protocadherin- 22) (Protocadherin on the Y chromosome) (PCDH-Y) (Protocadherin prosate cancer) (Protocadherin-PC). [Source:Uniprot/SWISSPROT;Acc:Q9BZA8]  
ATGTATTTTAACCTAAATTTTATCTATCTATCTATCTATCTATCTATCTATGTATCTATCTTCCTATTTAACAGAT  
TTTCTATTTGTACATTCATG

In100 candidate5 (in intron):

LOCUS ENSG00000099715

DESCRIPTION Protocadherin-11 Y-linked precursor (Protocadherin-11)  
(Protocadherin- 22) (Protocadherin on the Y chromosome) (PCDH-Y) (Protocadherin prosate cancer) (Protocadherin-PC). [Source:Uniprot/SWISSPROT;Acc:Q9BZA8]  
ATATTTTCTCCCATTTTGTGAGTTGTCTTTTAACTTTGTTTATTATTTTATTCATCCTGCAGAAGCTTTTAACTTCACG  
TGATCCCGTTTGTCCATTTT

In100 candidate6 (in intron):

LOCUS ENSG00000099715

DESCRIPTION Protocadherin-11 Y-linked precursor (Protocadherin-11)  
(Protocadherin- 22) (Protocadherin on the Y chromosome) (PCDH-Y) (Protocadherin prosate cancer) (Protocadherin-PC). [Source:Uniprot/SWISSPROT;Acc:Q9BZA8]  
TGTCTTGATACCTATCTTGTCTTATATAACTGTTCTGCTCTTTTTTTTTTTTATTTTCATTGGCAGGTATATTTTGGCAG  
ATATATTTTCTATCCCCTT

In100 candidate7 (in intron):

LOCUS ENSG00000092377

DESCRIPTION F-box-like/WD repeat protein TBL1Y (Transducin beta-like 1Y  
proein) (Transducin-beta-like 1, Y-linked). [Source:Uniprot/SWISSPROT;Acc:Q9BQ7]  
TCTAGTAACTTGCTTGCTTTTTTTTCTGTTACCTTTTCTCCCTTAAATATTTTTTTTTTTTTTTGAGACAGAGTCTC  
GCTCTGTCTCTTGTGGGTCT

In100 candidate8 (in intron):

LOCUS ENSG00000092377

DESCRIPTION F-box-like/WD repeat protein TBL1Y (Transducin beta-like 1Y  
proein) (Transducin-beta-like 1, Y-linked). [Source:Uniprot/SWISSPROT;Acc:Q9BQ7]  
AACCTACTGACATGTTGATTCTTTGAAAAGAAATTTAGAACTCATGTCTAACCACCCCTCCCCTTGTATTTCTTACAGCT  
CTTTCTTCTCTAACTTTTTT

In100 candidate9 (in intron):

LOCUS ENSG00000099725

DESCRIPTION Serine/threonine-protein kinase PRKY (EC 2.7.11.1).  
[Source:Unirot/SWISSPROT;Acc:O43930]  
TCCCACATTCCTCCATGGGAAGGTAAGTAAATTTCTCTCCTTGTCTTGTCTTTCTTTCTTCTGACTTGTATCTCCCAGAG  
CCTGCAGTACTTTTTTTCTT

In100 candidate10 (in intron):

LOCUS ENSG00000114374

DESCRIPTION Probable ubiquitin carboxyl-terminal hydrolase FAF-Y (EC 3.1.2.5)  
(Ubiquitin thioesterase FAF-Y) (Ubiquitin-specific-processing protease FF-Y)  
(Deubiquitinating enzyme FAF-Y) (Fat facets protein-related, Y- linked

(Ubiquitin-specific protease 9, Y chro [Source:Uniprot/SWISSPROT;Acc:O0050]

CTTTTATGTTTATAGAGATCGCTTCTTCCCTTAAACCTCATGAACTAACCTCTGCTAGTTTTAAGCTTTTCTTCTGCAGCT  
TTCTTTTCTCTCAGCCTTTA

In100 candidate11 (in intron):

LOCUS ENSG00000067048

DESCRIPTION ATP-dependent RNA helicase DDX3Y (EC 3.6.1.-) (DEAD box protein3,  
Y- chromosomal). [Source:Uniprot/SWISSPROT;Acc:O15523]

CTACTTCATAAGTTCTTTTACTTCTTAATCATAGACTGGCCTGTTGATTTAACTGAAAACACTTGATTGTGTTTCCAGAT  
CATTTTCACTTTCCAACCTT

In100 candidate12 (in intron):

LOCUS ENSG00000183878

DESCRIPTION Ubiquitously transcribed Y chromosome tetratricopeptide repeat  
rotein (Ubiquitously transcribed TPR protein on the Y chromosome).

[Source:niprot/SWISSPROT;Acc:O14607]

AGAATCCTCCGCATATAACAATATGTTCAATCTGCCACTTTTGGCATTCTGCTATTTTCAGTTAATTTTTTTTCATTTT  
TTCAATTTATTTTGGACTTT

In100 candidate13 (in intron):

LOCUS ENSG00000183878

DESCRIPTION Ubiquitously transcribed Y chromosome tetratricopeptide repeat  
rotein (Ubiquitously transcribed TPR protein on the Y chromosome).

[Source:niprot/SWISSPROT;Acc:O14607]

AGATGAAGGTAATTAACCTGCTTTGGTTTCATGGAAAATTTTTCTTTGCTTTTACCTTTTTCAGTCTCATCTACTGCCT  
TCTGATTTAATGCTTCTAAT

In100 candidate14 (in intron):

LOCUS ENSG00000183878

DESCRIPTION Ubiquitously transcribed Y chromosome tetratricopeptide repeat  
rotein (Ubiquitously transcribed TPR protein on the Y chromosome).

[Source:niprot/SWISSPROT;Acc:O14607]

AGTTGTATATGTTTTTTAACAATTTTTTCCATTGGTTTTGTGTTTTCTATTTTCAGTAATTTTTTTTCTTCTTACCTGT  
GTTATTTATTCCCTTGTATT

In100 candidate15 (in intron):

LOCUS ENSG00000183878

DESCRIPTION Ubiquitously transcribed Y chromosome tetratricopeptide repeat  
rotein (Ubiquitously transcribed TPR protein on the Y chromosome).

[Source:niprot/SWISSPROT;Acc:O14607]

AAACACAAGCATAACCTCTACCCCAAGTTATTATTTTACCTATTTCCCAACTTTTTGTAATCAGATCTCTTCACCAAATC  
AGTTGTTCTGCTTCTGTCTT

In100 candidate16 (in intron):

LOCUS ENSG00000165246

DESCRIPTION Neuroligin-4, Y-linked precursor (Neuroligin Y).

[Source:Unipro/SWISSPROT;Acc:Q8NFZ3]

GTTTTATGAGTTATGATGAATGCATCTTAGCTGTTTCTAACCTCCCTCCCATTCCCTATTTTTATTTGTCAGTTAAAGCA  
CAGCATTTTTCCCTTTTTTTT

In100 candidate17 (in intron):

LOCUS ENSG00000165246

DESCRIPTION Neuroligin-4, Y-linked precursor (Neuroligin Y).

[Source:Unipro/SWISSPROT;Acc:Q8NFZ3]

CCTATAACCATCAAAGATTAGTTTTTAATCTATTTGACTGATTTTTATTTTTTATACCTCTGCCTTCATTCTCACCAGAT  
TTCTCTTTGACCACAGTTGT

In100 candidate18 (in intron):

LOCUS ENSG00000099749

DESCRIPTION Putative testis protein CYorf15A.

[Source:Uniprot/SWISSPROT;AccQ9BZA5]

ATTTTTGGTTATATAAAGTAAGTTTTAACCTAATGTCCAAATTAAATCCCTTTGTCTCTTTTCTCTGTCTCTTCCCAGTT  
CTTTTTTCCTTGATCTTAAT

In100 candidate19 (in intron):

LOCUS ENSG00000180715

DESCRIPTION

AACTGATCCAAGCCTTAACTGTTGTACCTGTGTGATGAAGCAAATTTCTTTTTCCCCTCTTCTTTTTCATCTAATCAGAT  
TCTAAATTCTACTCATTTCT

In100 candidate20 (in intron):

LOCUS ENSG00000101577

DESCRIPTION Lipin-2. [Source:Uniprot/SWISSPROT;Acc:Q92539]

AGTGTTCCACATAACGTGATGGCTGCCTCTGTATTTGTATTCACCAGTCGAAACCCGTCGCACTTTTTTTTTTTTTTTTTT  
TTTTTTTTTTTAGCTGGAGTT

In100 candidate21 (in intron):

LOCUS ENSG00000170579

DESCRIPTION Disks large-associated protein 1 (DAP-1) (Guanylate kinaseassociated  
protein) (hGKAP) (SAP90/PSD-95-associated protein 1) (SAPAP1) (PSD-  
9/SAP90-binding protein 1). [Source:Uniprot/SWISSPROT;Acc:O14490]

TCTAGTTCTGTCAATTGTTGGGAGGTAGTAACTGAGGTCTCCAAC TACAATCGTGAATTTTCTATTTCTCCTTTCAGTT  
CTATCAGCTTTTTCATTCAA

In100 candidate22 (in intron):

LOCUS ENSG00000154655

DESCRIPTION l(3)mbt-like 4 [Source:RefSeq\_peptide;Acc:NP\_775735]

GTTTTATTTTAATCCTTTAAGAAGTTATGGAACTGTAACTTCCTGTCACTTTTCTCACCTAATTCGTCAGTTTCTTGT  
GGGCATATCTTGGTTTTCTT

In100 candidate23 (in intron):

LOCUS ENSG00000154655

DESCRIPTION l(3)mbt-like 4 [Source:RefSeq\_peptide;Acc:NP\_775735]

TGTTGTGGGCCATTAACAATAATGTAACCCTTTTTGTGATTGCAGTTTCTCACATCCTTCTGACCACCGCCATCTTTT  
TCTAGATAATTTCTTTGAAT

In100 candidate24 (in intron):

LOCUS ENSG00000088756

DESCRIPTION Rho GTPase activating protein 28 isoform b

[Source:RefSeq\_peptide;Acc:NP\_109597]

AATAACTAAATTAAACCTTAAATTTCAAGTTCTCTTCTTTTCCTTGAATTTTCTGCTCCCTTCAGAGTCATGTGTTTATT  
TTAGCATCGTTGTTTTTCTC

In100 candidate25 (in intron):

LOCUS ENSG00000173482

DESCRIPTION Receptor-type tyrosine-protein phosphatase mu precursor (EC  
3.13.48) (Protein-tyrosine phosphatase mu) (R-PTP-mu).

[Source:Uniprot/SWISSPRT;Acc:P28827]

GTTCTGGCACAAATAGCTAAAACTCTCAACAAACGAGTTAACCTTGCTATTCCTAGTTTCTTAATCCTTCTGGTCAGTG  
TTTTTTTGTGTTGTTGTTGTTG

In100 candidate26 (in intron):

LOCUS ENSG00000168502

DESCRIPTION Uncharacterized protein KIAA0802.

[Source:Uniprot/SWISSPROT;AccQ9Y4B5]

GTTTCCTAACTTCTTTTCCTTTTATTTCCCTTTTCCTTTGCTTCACGCTTCTACATATCCTTTGGTTCAGTGGTCTCTCTC  
AGCCTTATTGCTCATTTGAT



In100 candidate27 (in intron):

LOCUS ENSG00000188992

DESCRIPTION Lipase member I precursor (EC 3.1.1.-) (Membrane-associated  
phosphatidic acid-selective phospholipase A1-beta) (mPA-PLA1 beta) (LPD lipase)  
[Source:Uniprot/SWISSPROT;Acc:Q6XZB0]

AAGTAGTAATATAACCCTTGTTACTGATTCCGTTTATTTGACTCTCCTCCTTTTCTTCTTTATTAGTCTAGCTAGCAGTC  
TATTTATTGTATTTTTTTTTT

In100 candidate28 (in intron):

LOCUS ENSG00000188992

DESCRIPTION Lipase member I precursor (EC 3.1.1.-) (Membrane-associated  
phosphatidic acid-selective phospholipase A1-beta) (mPA-PLA1 beta) (LPD lipase)  
[Source:Uniprot/SWISSPROT;Acc:Q6XZB0]

TAGGAGTCTCTGCAAGGGGAGGCTCTAATGAGGGCATAACATAAGTCTCTTCTTTCTTTGTTATTTCTGTCATTGCAGCC  
CTTTTCACTTCTTTGTCTGC

In100 candidate29 (in intron):

LOCUS ENSG00000155288

DESCRIPTION Putative ATP-binding cassette transporter C13.  
[Source:Uniprot/WISSPROT;Acc:Q9NSE7]

AGTATTTATTTTCTGTGTCTAGCTTATTTCACTTAGCATAACGGCTTAAGGTCCATCCATGTTGTCTCATATTTTCAGAG  
TTGTCTTCTTTTTTAAGCCT

In100 candidate30 (in intron):

LOCUS ENSG00000155288

DESCRIPTION Putative ATP-binding cassette transporter C13.

[Source:Uniprot/WISSPROT;Acc:Q9NSE7]

GAAATTAACCTCTCATTTTACCTTTCATTTTCGTGGTGATTTTGCTGTCCTTTTTTCTATTGTTTCTTCTGTCTGCAGCA  
CTTTATTGTTTCATTCGTTTG

In100 candidate31 (in intron):

LOCUS ENSG00000155288

DESCRIPTION Putative ATP-binding cassette transporter C13.

[Source:Uniprot/WISSPROT;Acc:Q9NSE7]

AATCAACTCTAACTCCTTTTATTTTTCCTCATATATTCTTTATACTCTTACATCTTTCCTGATTCCAGTCCTTTAGTGA  
CTAAATTTTTGTTATTCTCT

In100 candidate32 (in intron):

LOCUS ENSG00000101745

DESCRIPTION Ankyrin repeat domain-containing protein 12 (Ankyrin repeatconaining  
cofactor 2) (GAC-1 protein). [Source:Uniprot/SWISSPROT;Acc:Q6UB98]

AGCATTCTTTCATAACTTTTTAATATTCCTCTCTAGTTGTATTCAGGCTCAATCTCAGTGGTTTTTTTTTGTGTTGTTG  
GTTGTTTTTATCTTTTCTCT

In100 candidate33 (in intron):

LOCUS ENSG00000155307

DESCRIPTION SAM domain-containing protein SAMSN-1 (SAM domain, SH3 domain and nuclear localization signals protein 1) (SH3-SAM adaptor protein) (Hematopoietic adaptor containing SH3 and SAM domains 1). [Source:Uniprot/SWISSPROT;Acc:Q9NSI8]  
GCATAGCCTTCTAGAGCTATCACTTTTCTATAGATTAATTTACACTTTCTAACTCCTACTATAGTTCTATGTACCCAGTC  
TCCCTCAATTACTTTTTGAT

In100 candidate34 (in intron):

LOCUS ENSG00000155313

DESCRIPTION Ubiquitin carboxyl-terminal hydrolase 25 (EC 3.1.2.15) (Ubiquitin thioesterase 25) (Ubiquitin-specific-processing protease 25) (Deubiquitinating enzyme 25) (USP on chromosome 21). [Source:Uniprot/SWISSPROT;Acc:Q9UHP]  
TTGTTTTTTTAACGGTTTAAAGGTCTTTGCATATCTTTTGTTACAGTTGACTTTTTTGATGCTATTGTAAGTGGTATTTTT  
TATTTTTTATTTTTATTTTTT

In100 candidate35 (in intron):

LOCUS ENSG00000155313

DESCRIPTION Ubiquitin carboxyl-terminal hydrolase 25 (EC 3.1.2.15) (Ubiquitin thioesterase 25) (Ubiquitin-specific-processing protease 25) (Deubiquitinating enzyme 25) (USP on chromosome 21). [Source:Uniprot/SWISSPROT;Acc:Q9UHP]  
TTTAGCTGAAGGAGCCAAGGACTGACTTAATGAGTCACCCACCGCTTAACACAAACTGTTTTTCTCCTTTGTTGTCAGTG  
GTGCTTTAGTTTTCTTTTAC

In100 candidate36 (in intron):

LOCUS ENSG00000155313

DESCRIPTION Ubiquitin carboxyl-terminal hydrolase 25 (EC 3.1.2.15) (Ubiquitin thioesterase 25) (Ubiquitin-specific-processing protease 25) (Deubiquitinating

enzyme 25) (USP on chromosome 21). [Source:Uniprot/SWISSPROT;Acc:Q9UHP]  
ATTTGGTTCATTTTCTACAAGTTAATTGTTTTTGCTAACTTGTAATTTTAACTTTTTTTTATATACTTCAGTGCTAAAAT  
TTTCACCGTTTTCTCCCTTT

In100 candidate37 (in intron):

LOCUS ENSG00000155313

DESCRIPTION Ubiquitin carboxyl-terminal hydrolase 25 (EC 3.1.2.15) (Ubiquitin  
thioesterase 25) (Ubiquitin-specific-processing protease 25) (Deubiquitinating  
enzyme 25) (USP on chromosome 21). [Source:Uniprot/SWISSPROT;Acc:Q9UHP]

CCCTTCTCAAGGAAGAAATCATTTTTATAAAATATTGTTAACTTATATGTCTACCTCAACTAGTTTCTTTCTTTCCAGCC  
ATCTCTGTTTCTTTATCCAT

In100 candidate38 (in intron):

LOCUS ENSG00000154845

DESCRIPTION Serine/threonine-protein phosphatase 4 regulatory subunit 1.  
[Source:Uniprot/SWISSPROT;Acc:Q8TF05]

AGATTTGAAAAATAAGAAATTTTTTATTATCCCATATTAACCTTTTTTTTTTCTTTCTTTCTTTTCTGGAGACAGGGT  
CTTGCTTTGTCTTCCAGACT

In100 candidate39 (in intron):

LOCUS ENSG00000174496

DESCRIPTION

CTGGTATTAAAAAATGGATTATTCTTTTTGATATAACTAAGATGAAACATTTTTTCATTTTTTCCTGTGATTTTCAGTT  
TGTCATTTATTATTATATTT

In100 candidate40 (in intron):

LOCUS ENSG00000174496

DESCRIPTION

TGGGCGGACCATAACATAGAATTTGTGTTCTTGTGAAATTTCTCTCTCTGACCTGATTCTCTTTGATGTGCTCCCCAGGA  
TTTTCTGTGTTTTAGATCTC

In100 candidate41 (in intron):

LOCUS ENSG00000174496

DESCRIPTION

TTGCTTATGGGCAAAGATGATTTTTTGGGGGAGATATTTGATTAACTTCTAATTTCTTTTATCTTTGACACCTTCAGTC  
TTCCTTCATTTACCTTTATA

In100 candidate42 (in intron):

LOCUS ENSG00000174496

DESCRIPTION

GAAATTGAAGCAAATGTGATTTCAAAGACCTAACTTTATCCAATTTTCTACTTTTTTCCAAGCTCTACATTTTCACAGTA  
AAACTTCTGTTTTATCTTTT

In100 candidate43 (in intron):

LOCUS ENSG00000206249

DESCRIPTION

AGTTTGTGTCCTATATTGCTCTTCCATTATTTTTAACTCTTCTGTATCTTTTTCATACAACCTCTTCAGCCTTTATTCTTT  
CTTCTTCTGTTGTTGTAAG

In100 candidate44 (in intron):

LOCUS ENSG00000154646

DESCRIPTION Enteropeptidase precursor (EC 3.4.21.9) (Enterokinase) (Serine  
rotease 7) [Contains: Enteropeptidase non-catalytic heavy chain; Enteropeptdase  
catalytic light chain]. [Source:Uniprot/SWISSPROT;Acc:P98073]

AGTTAACAAACCACTATTTTTCTTTCTTTCCTGTGATCTGTGCCGATTGTTTCAGAATTTAATCCTTGCTTCTTGACTTG  
TTATCTTTTCTTTTCTTATT

In100 candidate45 (in intron):

LOCUS ENSG00000141404

DESCRIPTION Guanine nucleotide-binding protein G(olf) subunit alpha (Adenylte  
cyclase-stimulating G alpha protein, olfactory type).

[Source:Uniprot/SWSSPROT;Acc:P38405]

TATTTTTATGTCTTGTAGATAAATATCATGAGTCAAATTTTCATTAACATTGGGAAAAGTTTTTTACTTGCCTTGACAGAT  
TTCCAATTGCTATATGTTTT

In100 candidate46 (in intron):

LOCUS ENSG00000154889

DESCRIPTION metallophosphoesterase 1 precursor

[Source:RefSeq\_peptide;Acc:N\_075563]

AGGTATTTTATATTGTAATTCAAGATAGGTATTCTTGGCCACTAACCCAATGTCTTGTTTCTTTAGCTTCTCAGCTTCTT  
TTTTACTTTCAAAGTTGGTC

In100 candidate47 (in intron):

LOCUS ENSG00000099968

DESCRIPTION Bcl-2-like 13 protein (Protein Mill) (Bcl-rambo).

[Source:Uniprt/SWISSPROT;Acc:Q9BXK5]

TACACAAAAAAGAATAACCCGTTATGCCATTCTTTCCATTTCCAGAAGCAAAAAACAAAAGTATTTTTTTTCATTTTATT  
CTTTTTTTTTTTTTTTTTTTTT

In100 candidate48 (in intron):

LOCUS ENSG00000154654

DESCRIPTION Neural cell adhesion molecule 2 precursor (N-CAM 2).

[Source:Unprot/SWISSPROT;Acc:O15394]

ATTCTACTACAAACACGTAACACGTGATTCATCTTCATTACTACTTGCTCCACTTGCCATTTCAATTTTATCAATCAGAA  
TACTTCATCTTCTTCCTATT

In100 candidate49 (in intron):

LOCUS ENSG00000154727

DESCRIPTION GA-binding protein alpha chain (GABP-subunit alpha) (Transcription  
factor E4TF1-60) (Nuclear respiratory factor 2 subunit alpha).

[Source:Uiprot/SWISSPROT;Acc:Q06546]

GTGAATATCCTTTTCCTATGCTTTAACTACTTTTCTAATTTGTCCCTTTTTTTGGTTATCAAATTCAGGCCATTGTCTA  
TTCCATCGTCACTTTTGGGT

In100 candidate50 (in intron):

LOCUS ENSG00000142192

DESCRIPTION Amyloid beta A4 protein precursor (APP) (ABPP) (Alzheimer disease amyloid protein) (Cerebral vascular amyloid peptide) (CVAP) (Protease nexin-II) (PN-II) (APPI) (PreA4) [Contains: Soluble APP-alpha (S-APP- alpha); Sluble APPbeta

(S-APP-beta); C99; Beta- [Source:Uniprot/SWISSPROT;Acc:P0506]

CTCTGCTGTCTTATTTGTGTTGATATCTTTATCTTTATTTCTCTAAAAATAACATGTCTTTTTTTCTGTTTTTACAGTT  
TTCTCTATATCACTGGTTTT

In100 candidate51 (in intron):

LOCUS ENSG00000183785

DESCRIPTION Peroxisome assembly protein 26 (Peroxin-26).

[Source:Uniprot/SWSSPROT;Acc:Q7Z412]

GTAACTTAGTCTTTAGATTCTCCCTGTTTCCCCATTTCTCTTTCTCTTATTCAGTGAGCTTTTTTAAAATATTTATTTA  
TTTATTTTTTATTTTTATTTT

In100 candidate52 (in intron):

LOCUS ENSG00000134278

DESCRIPTION spire homolog 1 [Source:RefSeq\_peptide;Acc:NP\_064533]

TGTATTTTAACTGTCATCTTTGATATTGCTAAATCTTTTTTGTTTTTTGTTTTTCTTAGTTTTTAGCAGAGTTTTACACT  
GCAAGAACCTTTCTCTTTTT

In100 candidate53 (in intron):



LOCUS ENSG00000184979

DESCRIPTION Ubl carboxyl-terminal hydrolase 18 (EC 3.1.2.-) (Ubl thioesterase 18) (ISG15-specific-processing protease) (43 kDa ISG15-specific protease)(hUBP43). [Source:Uniprot/SWISSPROT;Acc:Q9UMW8]

CCCCTAACTCTCTTAAGATATCTTCACTCTTTTTCATTCTTTTTCATTTTGTCTCCTCTGAATGATTTCCAGTGACCTAT  
CTTCTAGTTTGCTAATCCTT

In100 candidate54 (in intron):

LOCUS ENSG00000128789

DESCRIPTION tumor necrosis factor superfamily, member 5-induced protein 1  
[Source:RefSeq\_peptide;Acc:NP\_064617]

ACTGAGAAAATTATTCTAACACTTAAGGCCATAACTACTTCTCAGAACTACAGTTTAATACTTGTTTTTCTTTTTTATAT  
TTCCACAATTTGATTACTCT

In100 candidate55 (in intron):

LOCUS ENSG00000166265

DESCRIPTION Cysteine and tyrosine-rich protein 1 precursor (Proline-rich doain- containing protein). [Source:Uniprot/SWISSPROT;Acc:Q96J86]

GATACCTTCACGTCACTGACTCTTCTTTCATCCTTAACATCTTGTTAAGCCCATACAATTAATTTCTTTTGTTCAGAT  
ATTTTATTCCTCATTTCTAG

In100 candidate56 (in intron):

LOCUS ENSG00000101639

DESCRIPTION centrosomal protein 192kDa [Source:RefSeq\_peptide;Acc:NP\_115518]

CCTCTCTGGTCCGGAGTGTAATCTAACATCACATGATGCATTTGGTTATCCTATCTGCTTACTCTCTTTCAGAATAGAGT  
TCCTTAGCCTTTCCTTATCT

In100 candidate57 (in intron):

LOCUS ENSG00000168675

DESCRIPTION Uncharacterized protein C18orf1.

[Source:Uniprot/SWISSPROT;Acc:15165]

GAATTTATCCTATTTGGAGTTTGTTGTAATTCCTGAGTGTATAGATTAACCTTTTCAATAACTTTAGTACATTTTCAGCC  
ATTATTCTTTGGATTTTGT

In100 candidate58 (in intron):

LOCUS ENSG00000067900

DESCRIPTION Rho-associated protein kinase 1 (EC 2.7.11.1) (Rho-associated,  
oiled- coil-containing protein kinase 1) (p160 ROCK-1) (p160ROCK) (Renal  
cacinoma antigen NY-REN-35). [Source:Uniprot/SWISSPROT;Acc:Q13464]

CAAAAGAGCCTGTTGATATGATCCATATGAGTCACAAACAAGACATAACCAACATTTATTTATTTATTTTCGCTCTCAGTC  
TTTTTTTTTTTTTTTAAATTT

In100 candidate59 (in intron):

LOCUS ENSG00000067900

DESCRIPTION Rho-associated protein kinase 1 (EC 2.7.11.1) (Rho-associated,  
oiled- coil-containing protein kinase 1) (p160 ROCK-1) (p160ROCK) (Renal  
cacinoma antigen NY-REN-35). [Source:Uniprot/SWISSPROT;Acc:Q13464]

AGCTTAACCAAATATGTGCCAATTTTATCTTTTCAGAAGACCTACTTTGGGTCACATTGGCTTTCTCTGTTATTTTCCTA  
TTCTGTGTTTTATTTATCTT

In100 candidate60 (in intron):

LOCUS ENSG00000093009

DESCRIPTION CDC45-related protein (PORC-PI-1) (Cdc45).

[Source:Uniprot/SWISPROT;Acc:O75419]

ATTCCTCTTTACTGTCTTAACCTAGAACCATACCTTACCTCTTTTTTTCTTTTGTTTTTAATGACATTGAAGGCCAGTT  
CTCTTTTCTAATATTTACTA

In100 candidate61 (in intron):

LOCUS ENSG00000101752

DESCRIPTION E3 ubiquitin-protein ligase MIB1 (EC 6.3.2.-) (Mind bomb homolo  
1) (DAPK-interacting protein 1) (DIP-1) (Zinc finger ZZ type with ankyrin repeat  
domain protein 2). [Source:Uniprot/SWISSPROT;Acc:Q86YT6]

TTTCCTCCACTCCTTTTCTGAGAGGTTTCCTTAACCTAATTTTCCCACCCTTTTCCAAGGTTTTTATTATTCCATCAGTT  
TTAAATTTCAAGCTTTTCTT

In100 candidate62 (in intron):

LOCUS ENSG00000134490

DESCRIPTION CDNA FLJ41629 fis, clone DFNES2010502.

[Source:Uniprot/SPTREMBLAcc:Q6ZW41]

AGCTAGGTCTTTCTTAACAAAAAGTGGCAAAAGTGTTATTGCTTTTTTCCCCTCTTTTCAGATCTCATGTTCTTGTTGG  
CTTCCTGCTTCAGTGCTGTT

In100 candidate63 (in intron):

LOCUS ENSG00000053747

DESCRIPTION Laminin subunit alpha-3 precursor (Epiligrin 170 kDa subunit)  
(170) (Nicein subunit alpha). [Source:Uniprot/SWISSPROT;Acc:Q16787]

ACTTGGGGAAGTTAATTAACCTTCTGAGCATCTTTTTTTTTTTTTTTTCATCTATAAAATACTTACCTGTCTTACAGGG  
CTCTTGTTTGACTTCATTAT

In100 candidate64 (in intron):

LOCUS ENSG00000040608

DESCRIPTION Reticulon-4 receptor precursor (Nogo receptor) (NgR) (Nogo-66  
receptor). [Source:Uniprot/SWISSPROT;Acc:Q9BZR6]

AAGATTTCTTTGACCTTGTTTTCTAACACTTGATTGATTTTTTTTTTAATTTAGTGATTCTATTTTAAATTTCCAGGC  
ACTCTTTCTTTTTGTCTGAT

In100 candidate65 (in intron):

LOCUS ENSG00000142207

DESCRIPTION Nucleolar preribosomal-associated protein 1 (Fragment).  
[Source:Uniprot/SWISSPROT;Acc:O60287]

TGTGTTTGTCTGTTTCTTTCTCATCCCTCTGTAACCAAAGGTCAACACTCTTCTGAGGTTCTGCTTTGTCTCGTCAGTA  
TCTTATTTTGTATTTTCATA

In100 candidate66 (in intron):

LOCUS ENSG00000168234

DESCRIPTION TPR repeat-containing protein C18orf17.

[Source:Uniprot/SWISSPRT;Acc:Q8N584]

CTCCTAAACCCTAAATGAAGAAGGATAAATTTCTTTTAAATTATAACATACTCTTTTCTTTCTAGCCTATCAGAAGCCGG  
TTTTTCCCCCTTTTCTTGT

In100 candidate67 (in intron):

LOCUS ENSG00000161133

DESCRIPTION Ubiquitin carboxyl-terminal hydrolase 41 (EC 3.1.2.15) (Ubiquitin  
thioesterase 41) (Ubiquitin-specific-processing protease 41) (Deubiquitinating  
enzyme 41) (Fragment). [Source:Uniprot/SPTREMBL;Acc:Q3LFD5]

CCCCTAACTCTCTTAAGATATCTTCACTCTTTTTCATTCTTTTTCATTTTGTCTCCTCTGAATGATTTCAGTGACCTAT  
CTTCTAGTTTGCTAATCCTT

In100 candidate68 (in intron):

LOCUS ENSG00000198795

DESCRIPTION zinc finger protein 521 [Source:RefSeq\_peptide;Acc:NP\_056276]

CATCCAAAGGAAGTAACCCTCATCCCCGTTTTCTCACTTTTTCATATTTTCAAGGGCTTACTTTTTATTTCTACAGAG  
CTTAATTTTTTTTTTTTTTTT

In100 candidate69 (in intron):

LOCUS ENSG00000141380

DESCRIPTION SSXT protein (Synovial sarcoma, translocated to X chromosome) (YT  
protein). [Source:Uniprot/SWISSPROT;Acc:Q15532]

AGTTAAACTTAGACTAGACCTTGTAAGTGTATCTTTATGTTTCTTAATCCCTTCAGACTTTTCCAACCATTTATCATTCT  
AAGTATATTTTTTCTGACC

In100 candidate70 (in intron):

LOCUS ENSG00000134504

DESCRIPTION BTB/POZ domain-containing protein KCTD1.

[Source:Uniprot/SWISSPOT;Acc:Q719H9]

TCTACTATTAAACATTACGGAAATATATAACTTAAAAGTGAAAATTCCCTGTAATGTTTTTTGTTTATATTCTTTCAGAT  
TTTTCTATGTATACTTATTT

In100 candidate71 (in intron):

LOCUS ENSG00000170558

DESCRIPTION Cadherin-2 precursor (Neural-cadherin) (N-cadherin) (CD325  
antien) (CDw325). [Source:Uniprot/SWISSPROT;Acc:P19022]

AGATTTTAATTGTACTAACTTTTAAATTGACTGCTACCTTATTCTGTGCTGTTTATATGCCTTTATTTTCCAGTTCAAC  
TTTTTTTTCTAGTGTCTGT

In100 candidate72 (in intron):

LOCUS ENSG00000153339

DESCRIPTION Protein TRS85 homolog. [Source:Uniprot/SWISSPROT;Acc:Q9Y2L5]

AAGGAATAGAAGTGAAACCATCTGTCTTCATAATTTAGAAATAACCACTTTAACATTTTGCTGTGTATCTTCCAGTC  
ATTTTGTTTTTATTTTTTTT

In100 candidate73 (in intron):

LOCUS ENSG00000153339

DESCRIPTION Protein TRS85 homolog. [Source:Uniprot/SWISSPROT;Acc:Q9Y2L5]  
AATTGTGATTTTCATTAGTTTACCTAACTGTAAGTCAAATTACCTATCTTGATCCAGTCTTTCCCATTTTTTTAAATTCCCT  
CCCACATCTTTTATACTTGT

In100 candidate74 (in intron):

LOCUS ENSG00000153339

DESCRIPTION Protein TRS85 homolog. [Source:Uniprot/SWISSPROT;Acc:Q9Y2L5]  
AGGAAAATTGCTTTTAAGAAGAAAAAATATATAACTTTTTTGTATTTTTCTTCCATAGCCTTTGTTTAGTACCAGTC  
ACTCTTTTACTTTCCAATTG

In100 candidate75 (in intron):

LOCUS ENSG00000100814

DESCRIPTION E3 ubiquitin-protein ligase CCNB1IP1 (EC 6.3.2.-) (Cyclin-B1-  
interacting protein 1) (Human enhancer of invasion 10).  
[Source:Uniprot/SWISSROT;Acc:Q9NPC3]

AACATTTTCTTTAGTTGGTTAATCTTGATTTTGGTACTAACTTGTTATCTAGTTCCTCATTTTCCCTTGCTGGATCAGTT  
GATCCTTAATGATCTCTTCT

In100 candidate76 (in intron):

LOCUS ENSG00000141441

DESCRIPTION Protein FAM59A. [Source:Uniprot/SWISSPROT;Acc:Q9H706]  
CTTAATATACTAGCACACAACTTATAGAATTAATACTAAAATCACATATATACTTGCCTTTTCTTTGTTCTGTCAACCAGGG  
TTTTTTTTTTTTGTGCAACAT

In100 candidate77 (in intron):

LOCUS ENSG00000141441

DESCRIPTION Protein FAM59A. [Source:Uniprot/SWISSPROT;Acc:Q9H706]

GTGTCCTAAAATGTGTATTCACCTCACCCCACTTACGTACATATTGTAACCTTTCAAAGAATTGTCCTGGCTTCATCAGAT  
AGTTTCATCTGCTTTGTTTT

In100 candidate78 (in intron):

LOCUS ENSG00000185686

DESCRIPTION Melanoma antigen preferentially expressed in tumors  
(Preferentially expressed antigen of melanoma) (OPA-interacting protein 4)  
(OIP4). [Source:Uniprot/SWISSPROT;Acc:P78395]

ATATTCCATTTTAACTAAAAGGTTAAAAAATATCCATAGATTTTTTTCTTTTCTTTTCAGATGCTTTGGAATTAAAGA  
CATTTTCTTTCTTTTTTTTTC

In100 candidate79 (in intron):

LOCUS ENSG00000166960

DESCRIPTION Uncharacterized protein C18orf34.  
[Source:Uniprot/SWISSPROT;AccQ5BJE1]

ATGTTAATTATTTTACTTTATTTTATTAACAATAACTCAAACCTTTGATTTTCAAGATCTCATTTTTCAGAAATTTTCCCA  
TTGTTGACAATCCTCATTTT

In100 candidate80 (in intron):

LOCUS ENSG00000166960



DESCRIPTION Uncharacterized protein C18orf34.

[Source:Uniprot/SWISSPROT;AccQ5BJE1]

AGATATGTGGTTTCCAATTATTTTTTTCCTAGTATGTAAGTGGACTTTTCATTTTTTTTTTAGTTTGATGCAGTTCATTT  
CTGTATTTTTGTCTTTGAAG

In100 candidate81 (in intron):

LOCUS ENSG00000166960

DESCRIPTION Uncharacterized protein C18orf34.

[Source:Uniprot/SWISSPROT;AccQ5BJE1]

TAGCTTACACATGCCACTTAACCAAGTTGATTCTACCCCTAGCCTTGGAACCTTTTTCTTTTGGCTTCCAGAACACATT  
CTTCATGGTTTTTGCTATTT

In100 candidate82 (in intron):

LOCUS ENSG00000166960

DESCRIPTION Uncharacterized protein C18orf34.

[Source:Uniprot/SWISSPROT;AccQ5BJE1]

CTTCAAAAAAATCAAAAGCTTATGGTTTAACTTAATTCTCCATCTCTACATTTGACTATATCCATTGTTTATCTCAGAA  
AGCTCTGTTCTTCTTACTCT

In100 candidate83 (in intron):

LOCUS ENSG00000101746

DESCRIPTION Nucleolar protein 4 (Nucleolar-localized protein).

[Source:Unipot/SWISSPROT;Acc:O94818]

TGTCATTATATGCTTTGGGATGGGGTTCATTTGCATAGTTAACTTTATTTTCATTCTTTTCATATCCTATCAGTTGCATTT  
TTTTATCTTGAATACATTTT

In100 candidate84 (in intron):

LOCUS ENSG00000101746

DESCRIPTION Nucleolar protein 4 (Nucleolar-localized protein).

[Source:Unipot/SWISSPROT;Acc:O94818]

GTACAACTTTTGCCTTAAAGTATATTTGATCTGATATTTTATAACCTCTCCACTTCTCTTTTGGTTTCCCTTTGCAGCG  
TATGTGTTTTTCATCCTTTTA

In100 candidate85 (in intron):

LOCUS ENSG00000101746

DESCRIPTION Nucleolar protein 4 (Nucleolar-localized protein).

[Source:Unipot/SWISSPROT;Acc:O94818]

CTTTTACATTTCTTTTAAAATATATATTATAAATAACATAAATATCAATTATCCTTACTAGATCCACTTGTTTTTCAGACT  
CATCTTCCAATTTACTAGTT

In100 candidate86 (in intron):

LOCUS ENSG00000101746

DESCRIPTION Nucleolar protein 4 (Nucleolar-localized protein).

[Source:Unipot/SWISSPROT;Acc:O94818]

TTGTCTTAGTTATATTTCAATTATTTTTTTAAAGACTTGTCATTAAC TACTGTATTAAGTCACTGTCTTCAGCCTCTGCC  
TGTTGGATTTTAACCTGTTT

In100 candidate87 (in intron):

LOCUS ENSG00000101746

DESCRIPTION Nucleolar protein 4 (Nucleolar-localized protein).

[Source:Unipot/SWISSPROT;Acc:O94818]

ATAATGGAAGATTCTTTCTTTTAAAAATAACATTAAAATAAGTTAATGTTTCATTTCTATCCTTGGCAGATTTTAT  
TTTTCAATATGAATTGTTTT

In100 candidate88 (in intron):

LOCUS ENSG00000134769

DESCRIPTION Dystrobrevin alpha (Dystrobrevin-alpha) (Dystrophin-related  
proein 3). [Source:Uniprot/SWISSPROT;Acc:Q9Y4J8]

TTGGTTGTAAATCATGTTATTTCATAAAGAAAAAGATAAGATCTTAGGTAACGTGAGTTCCTGGCACTTCTGTTTCAGGGT  
TTATCTCATTCCTACAATT

In100 candidate89 (in intron):

LOCUS ENSG00000118267

DESCRIPTION zinc finger protein 271 [Source:RefSeq\_peptide;Acc:NP\_006620]

AAAAACCTTTCTTGGTTTTTATTTAACTGAAAATATCTTTATTTTAACTTTTCTTTCAGGCATTTTATCTTCTTATGCAA  
GTCTATGTTGGCACTTCTTT

In100 candidate90 (in intron):

LOCUS ENSG00000186496

DESCRIPTION Zinc finger protein 396 (Zinc finger and SCAN  
domaincontainingprotein

14). [Source:Uniprot/SWISSPROT;Acc:Q96N95]

ATCTTCCCTTTATTGGCCTAACTTATATTTTCTTACTTTATTTTCCACATTCCTTTTTGGCCCCTTGGCTTCTTCAGCT  
CATTTCTTGCATAGTTACT

In100 candidate91 (in intron):

LOCUS ENSG00000205726

DESCRIPTION Intersectin-1 (SH3 domain-containing protein 1A) (SH3P17).

[Source:Uniprot/SWISSPROT;Acc:Q15811]

CTAAATACACTTATACTTTCCTTTTCTTTTAACATACAATCTGATTTAGTTCTTTCTCTAGAATGTCTTGCTCAGATTAA  
TTTGTCTTTTGTGGGTTTCT

In100 candidate92 (in intron):

LOCUS ENSG00000205726

DESCRIPTION Intersectin-1 (SH3 domain-containing protein 1A) (SH3P17).

[Source:Uniprot/SWISSPROT;Acc:Q15811]

GTGTTACTCTTATAACAATTTTAACTCATTCTTTTCCTTTTCTTCTCCTGACAGACATTTTTTTAAATGTAGCCAACAA  
TACCTTTTTCCTCTACCTTC

In100 candidate93 (in intron):

LOCUS ENSG00000075643

DESCRIPTION Molybdenum cofactor sulfurase (EC 4.4.-.-) (MoCo sulfurase) (MO)

(HMCS). [Source:Uniprot/SWISSPROT;Acc:Q96EN8]

AGCTTTTGATACCTATACCCACCTAACTGGTGGTTTTAATTTTTTCCATCAGCAGACTCTGTCAAATTTAATTTTACCTT  
TTATGGCTTTTTTTTTTTTCT

In100 candidate94 (in intron):

LOCUS ENSG00000134775

DESCRIPTION formin homology 2 domain containing 3

[Source:RefSeq\_peptide;Ac:NP\_079411]

AGGCTGGCTTTTAACTGCTTTAGATCTATGTATTAATTTCTCCTACTCAGCAGCCCAAGCCTCTGCGGACTTTTTTTTTT  
TTTTTGCTTTTCCAGTGCGC

In100 candidate95 (in intron):

LOCUS ENSG00000134775

DESCRIPTION formin homology 2 domain containing 3

[Source:RefSeq\_peptide;Ac:NP\_079411]

TATGAATTGCACTGCTTTTCTGTTTTGTAACCAATGTTTTGCTATTATCTTTATAAATCCCTTTTACTTTCTTTCAGTT  
TACCTTGTTATTTTTCTGGA

In100 candidate96 (in intron):

LOCUS ENSG00000150477

DESCRIPTION KIAA1328 (KIAA1328), mRNA [Source:RefSeq\_dna;Acc:NM\_020776]

TAAATATACGTGTGCATCATTCACCCACTTTCTAACATTCAAAGTTTTGTTGGTATCTTTTCCAGTTTCTCGGTCCATCC  
CTGCATGTCTGTACTTTTTT

In100 candidate97 (in intron):

LOCUS ENSG00000092203

DESCRIPTION Epidermal Langerhans cell protein LCP1.

[Source:Uniprot/SWISSPRt;Acc:O94842]

AGTTAGAAGGTAACCTGCATATCATGTTTCCTGTTTTCTCTTTCTGTGTCCAAACCACTTCTTTTAAATATTTGCTTCAGTT  
TTAGTTTTGTTTTATATTTA

In100 candidate98 (in intron):

LOCUS ENSG00000078142

DESCRIPTION Phosphatidylinositol 3-kinase catalytic subunit type 3 (EC 2.7..137) (PtdIns-3-kinase type 3) (PI3-kinase type 3) (PI3K type 3) (Phosphoinositide-3-kinase class 3) (Phosphatidylinositol 3-kinase p100 subunit). [Source:Uniprot/SWISSPROT;Acc:Q8NEB9]

AACTAACTCTTCTCATGGTTTAGGTGATACTGTATATCTCTTGTTTTCTCTTCATCTGTCTTGCCATTTCTTCTCAGTT  
TCATTTGTCAGCACTTTCCT

In100 candidate99 (in intron):

LOCUS ENSG00000180509

DESCRIPTION Potassium voltage-gated channel subfamily E member 1 (IKs produing slow voltage-gated potassium channel subunit beta Mink) (Minimal potassum channel) (Delayed rectifier potassium channel subunit Isk). [Source:Unipot/SWISSPROT;Acc:P15382]

TATCGATATCTTACATTTGTTACAATGAAACAAATAATGACCTGTTATTAACAAAAGTTCATAATTTTGTTCTTTTCAGTC  
TTTACTTAATGTCTTTTCCT

In100 candidate100 (in intron):

LOCUS ENSG00000152217

DESCRIPTION SET-binding protein (SEB). [Source:Uniprot/SWISSPROT;Acc:Q9Y6X0]

ACTTTGATTATGTTCTGTTGTCCTGGTAACTTCATATGAATTTCCATGGTCTGTTAAACTGTTCTTTCTTTATTTTCAGGC  
ATTTGCTTTTTCTTCTGATC

In100 candidate101 (in intron):

LOCUS ENSG00000152217

DESCRIPTION SET-binding protein (SEB). [Source:Uniprot/SWISSPROT;Acc:Q9Y6X0  
ATATCCTCATTTTTCTCCTATGATATCTTTCTTCTTTGATAACCACCATTATTTGTGTTTCTGTTTATCTTCTCCAGTT  
TGTC AATGTCCTTCTTACTC

In100 candidate102 (in intron):

LOCUS ENSG00000159216

DESCRIPTION Runt-related transcription factor 1 (Core-binding factor, alpha2  
subunit) (CBF-alpha 2) (Acute myeloid leukemia 1 protein) (Oncogene AML-1  
(Polyomavirus enhancer-binding protein 2 alpha B subunit) (PEBP2-alpha B) PEA2-  
alpha B) (SL3-3 enhancer factor 1 [Source:Uniprot/SWISSPROT;Acc:Q01196  
AAAAGAATTATCATTTCTTTAGAGTGATTATAAGGAAGAATTAATATTAACAAAATTCTCAATGTTTGGCCTTCCCAGGA  
TTCTCCTTATCAATCTATTA

In100 candidate103 (in intron):

LOCUS ENSG00000159256

DESCRIPTION MORC family CW-type zinc finger protein 3 (Zinc finger CW-type  
oiled- coil domain protein 3). [Source:Uniprot/SWISSPROT;Acc:Q14149]  
AGCCATATTTTAGTGCTAACCGGGACAAAAGCCATAGTGTTTTTCCCAGTGTTGACTACTCTGCCTGGCCTCTCTCTTCT  
GTCTTAATACTTACTGTGTT

In100 candidate104 (in intron):

LOCUS ENSG00000159267

DESCRIPTION Biotin--protein ligase (EC 6.3.4.-) (Biotin apo-protein ligase)[Includes: Biotin--[methylmalonyl-CoA-carboxytransferase] ligase (EC 6.3.4.); Biotin--[propionyl-CoA-carboxylase [ATP-hydrolyzing]] ligase (EC 6.3.4.1) (Holocarboxylase synthetase) (HCS); B  
[Source:Uniprot/SWISSPROT;Acc:P5074]

TTTCCATGTATAACAAGAATGTTGTTATTGTCTTCACAGGGGATTTTATTATTGCCATTCTAGAATGGACCTTTTATTTC  
TTCGCCATCTCCATTTTCTC

In100 candidate105 (in intron):

LOCUS ENSG00000134049

DESCRIPTION Immediate early response 3-interacting protein 1.  
[Source:Uniprt/SWISSPROT;Acc:Q9Y5U9]

CTCTTAAGGAATATCTCCATGCAATTGCCATAATCTCTCCCTGTAATAACACATTATCACATGTTGATTTTTTTCAGCT  
TTCTTCTTTTTCTTTTTTCAG

In100 candidate106 (in intron):

LOCUS ENSG00000141627

DESCRIPTION Dymeclin (Dyggve-Melchior-Clausen syndrome protein).  
[Source:Unprot/SWISSPROT;Acc:Q7RTS9]

TTATTTGTCCTCTTGTTCTTTATTATGGGAGTTCCTTAACTTTTATCTTTTCTCCGTTCTTTTGTTTTAAATTTTCAGGT  
GTCCTTTCTTGTTCTTTATT



In100 candidate107 (in intron):

LOCUS ENSG00000141627

DESCRIPTION Dymeclin (Dyggve-Melchior-Clausen syndrome protein).

[Source:Unprot/SWISSPROT;Acc:Q7RTS9]

TTGCACAATACCTTATAATAACAAAGCATTCCTAATTCTTTCTGCCTGTCTGTTGCATTTTCAGTTCACATATACATTGC  
TGTCCCTTCATTTCACTTCTT

In100 candidate108 (in intron):

LOCUS ENSG00000141627

DESCRIPTION Dymeclin (Dyggve-Melchior-Clausen syndrome protein).

[Source:Unprot/SWISSPROT;Acc:Q7RTS9]

TTATAACCAATACTGTTATTATTCTGTTGCTCACATTGTTCCAGCTTTGGCCATTGGGAGCTCTTTCATGTTGTGTCCTC  
TGCCCTCTCAGTTTACTCTT

In100 candidate109 (in intron):

LOCUS ENSG00000141627

DESCRIPTION Dymeclin (Dyggve-Melchior-Clausen syndrome protein).

[Source:Unprot/SWISSPROT;Acc:Q7RTS9]

CATCTCATTC AATACATATTCGTGGGGTAAATTA ACTTCACCCTGCCTCTGGATTCCTATTTCTCTCCTTCTTCTCAGCC  
AAAATCTTGATTTCTCCTTT

In100 candidate110 (in intron):

LOCUS ENSG00000198412

DESCRIPTION

TAATAATAGTAACTGGGGAAATTATTCATTCTATTTGCCAAGGATTTCA TTTCTCCCTCCTTCAGGCACATAGCAGAATT  
TTTTTTTTTTTACTTGCTTCT

In100 candidate111 (in intron):

LOCUS ENSG00000100122

DESCRIPTION Beta crystallin B1. [Source:Uniprot/SWISSPROT;Acc:P53674]

AGCCAAGAAAACCAATTTTTTGAAATAACACTTCCTCTCTTTCATTTGCTTCATTGTTAACCAGTCCCTAAGTCCTATTC  
TTGCTTCCTTGGATTTGTTC

In100 candidate112 (in intron):

LOCUS ENSG00000157554

DESCRIPTION Transcriptional regulator ERG (Transforming protein ERG).

[Source:Uniprot/SWISSPROT;Acc:P11308]

CACTGTTCACTTGGACATCTCATGCTAGCCTCCACACTCCTTAACATCTCTGTTTTTCCTTCTTTCTAGGTAGTTCAGTA  
ATTTCTCTTACCATTTTTGA

In100 candidate113 (in intron):

LOCUS ENSG00000100154

DESCRIPTION Tetratricopeptide repeat protein 28 (TPR repeat protein 28).

[Source:Uniprot/SWISSPROT;Acc:Q96AY4]

TAATCTAATATAACCACCTAGCCATCTTTAGTCACATCATTCTATTTCAATTCCTCTTAAGCTCTTTTTACTATCAGAT  
TGTTTTTGTGTTTTTGGTCAT

In100 candidate114 (in intron):

LOCUS ENSG00000100154

DESCRIPTION Tetratricopeptide repeat protein 28 (TPR repeat protein 28).

[Source:Uniprot/SWISSPROT;Acc:Q96AY4]

GCATAGTGCCTGAACTATTAATAATTTACATACCCATTAAGTATGTTAATCATTCCTTTTCTCTGCAGCCTCGTCAACG  
TCTGTTATGTTTTGACTTTT

In100 candidate115 (in intron):

LOCUS ENSG00000100154

DESCRIPTION Tetratricopeptide repeat protein 28 (TPR repeat protein 28).

[Source:Uniprot/SWISSPROT;Acc:Q96AY4]

ATATATTTTAAAAACACTTGAACATAGTTACAATAACTTTTAATTTTCTTGTCTGCTAATTTTATCATCTCAGTCATTTTG  
GCAATCTTTATTAATTTTTC

In100 candidate116 (in intron):

LOCUS ENSG00000100154

DESCRIPTION Tetratricopeptide repeat protein 28 (TPR repeat protein 28).

[Source:Uniprot/SWISSPROT;Acc:Q96AY4]

ATAGAGACGCATTGAATCTTTACTTTCTTTAACTCTTACATTAATCTCTTTCTCTTTACCATCAGCCTGTACATATGTTT  
AAGTCTCTCGTATTTTTTTTT

In100 candidate117 (in intron):

LOCUS ENSG00000183765

DESCRIPTION Serine/threonine-protein kinase Chk2 (EC 2.7.11.1) (Cds1).

[Source:Uniprot/SWISSPROT;Acc:O96017]

TTATGTATTGATAACATTTGTATGGTATCTATTTGTGTATTATTTTTTATTTTTATTTTTGTGTGTTATTTTACACAGTC

ATTTTAATTTATTTTATTT

In100 candidate118 (in exon):

LOCUS ENSG00000185658

DESCRIPTION Bromodomain and WD repeat domain-containing protein 1 (WD repeat protein 9). [Source:Uniprot/SWISSPROT;Acc:Q9NSI6]

TAAAAACTGGTGATAGATGTCAAATCCATTAATTTATTTAAACTCTTCTTAACCTTCTCTTTTATAATCTGTTCTCAGGT  
TTTAACTCCATGTTTACCAT

In100 candidate119 (in intron):

LOCUS ENSG00000157326

DESCRIPTION Dehydrogenase/reductase SDR family member 4 (EC 1.1.1.184)  
(NADHdependent

carbonyl reductase/NADP-retinol dehydrogenase) (CR) (PHCR) (Peroxisomal  
short-chain alcohol dehydrogenase) (NADPH-dependent retinol  
dehydrogenase/reductase) (NDRD) (SCAD-SRL) (hu

[Source:Uniprot/SWISSPROT;Acc:Q9BTZ]

AGAGATTTGCTGCTAACCATTTAAGTTTGGCTTCTTTCTTTCTTTTTTTAGACAGACTCTTGCTCTGTCTTTTTTCCTTT  
TTTTTTTTTTTTCCCTCGCT

In100 candidate120 (in intron):

LOCUS ENSG00000187630

DESCRIPTION dehydrogenase/reductase (SDR family) member 4 like 2

[Source:ReSeq\_peptide;Acc:NP\_932349]

AGAGATTTGCTGCTAACCATTTAAGTTTGGCTTCTTTCTTTCTTTTTTTAGACAGACTCTTGCTCTGTCTTTTTTCCTTT  
TTTTTTTTTTTTCCCCCTCGC

In100 candidate121 (in intron):

LOCUS ENSG00000134042

DESCRIPTION Protein maestro (Male-specific transcription in the developing  
eproductive organs) (Protein B29). [Source:Uniprot/SWISSPROT;Acc:Q9BYG7]

TTTAATTGAATGTTATCTATTAGCATAACAATAAGTGCCTCTGTCTTTGAAAATATAACTGTTCTTTTTTCCTTTCAGGA  
CATATTTTCTCCCTTTATGA

In100 candidate122 (in intron):

LOCUS ENSG00000082212

DESCRIPTION NAD-dependent malic enzyme, mitochondrial precursor (EC 1.1.1.3)  
(NAD-ME) (Malic enzyme 2). [Source:Uniprot/SWISSPROT;Acc:P23368]

AATTTTCTGATGGTAACAAATATCTCACTCATTTTTATTATCTATCTTTTGTTCTGTCTTGGTTATCAGGTTTGTTTGTA  
AGGCTAATTTGTCCTTTTTT

In100 candidate123 (in intron):

LOCUS ENSG00000082212

DESCRIPTION NAD-dependent malic enzyme, mitochondrial precursor (EC 1.1.1.3)  
(NAD-ME) (Malic enzyme 2). [Source:Uniprot/SWISSPROT;Acc:P23368]

CTGTTTTAAATTTTATAATGTGTATAATGTAACATTTAGTACTTTATCTTTCCCATCATTATGCTTTTTTCAGTGTCTTCT  
TGACTGTTCTAAATTGTTTT

In100 candidate124 (in intron):

LOCUS ENSG00000187323

DESCRIPTION Netrin receptor DCC precursor (Tumor suppressor protein DCC)  
(Clorectal cancer suppressor). [Source:Uniprot/SWISSPROT;Acc:P43146]

ATGACATTACCTGATATTTAGAAATATAAACTATGATTTGTATGGCTAACATTTATTTTATACTTTTTTTCTTTTCCAGGC  
ACTGCTTTTTTTTTTTCCTTT

In100 candidate125 (in intron):

LOCUS ENSG00000187323

DESCRIPTION Netrin receptor DCC precursor (Tumor suppressor protein DCC)  
(Clorectal cancer suppressor). [Source:Uniprot/SWISSPROT;Acc:P43146]

CATCGTGGCCTTTTATACCTTTATTTTAAGTGTATTAATTAACCATCAAGGTTTTTCATAGCTTCTGCAGGTTTCATTT  
CTAGTACATCATATTTATTT

In100 candidate126 (in intron):

LOCUS ENSG00000187323

DESCRIPTION Netrin receptor DCC precursor (Tumor suppressor protein DCC)  
(Clorectal cancer suppressor). [Source:Uniprot/SWISSPROT;Acc:P43146]

ATTGATTCTGCTGGGTAAATAAGGGTGTCTTAAGTTTAACCCATTGTCTGTACTCACTTCTTCTTTGATTGTCAGTT  
TTCTATATTCTTACTTTCCT

In100 candidate127 (in intron):

LOCUS ENSG00000187323

DESCRIPTION Netrin receptor DCC precursor (Tumor suppressor protein DCC)  
(Clorectal cancer suppressor). [Source:Uniprot/SWISSPROT;Acc:P43146]

GAGAAGATATTCATAAACATTTTATAACCTCTTACAATTTTTCCTATTTTCTTCTTTCCCTTTTTATATTCATCCAGTT  
TCATCTATTCTTTATTTCTT

In100 candidate128 (in intron):

LOCUS ENSG00000187323

DESCRIPTION Netrin receptor DCC precursor (Tumor suppressor protein DCC)  
(Clorectal cancer suppressor). [Source:Uniprot/SWISSPROT;Acc:P43146]

TGGTCCTTGATTCATTTCTTAGGTCCACTAACTCCCTTTTCATTTAATTCTGTTGTTTTATCCTCCAGTCTTTGACCTC  
TAGCTCTATTGAATTTATTT

In100 candidate129 (in intron):

LOCUS ENSG00000187323

DESCRIPTION Netrin receptor DCC precursor (Tumor suppressor protein DCC)  
(Clorectal cancer suppressor). [Source:Uniprot/SWISSPROT;Acc:P43146]

AGGACTCCTATTATCTGTACGTTAGATCTTCCTTCTCTAACTTCAATATTTATCACTTTCTCCTGAATCCTTTTTTCAGTC  
TTCTTAATTTCTTTTGTTAT

In100 candidate130 (in intron):

LOCUS ENSG00000187323

DESCRIPTION Netrin receptor DCC precursor (Tumor suppressor protein DCC)  
(Clorectal cancer suppressor). [Source:Uniprot/SWISSPROT;Acc:P43146]

CTGAAGACACATTTCACTTCTGCATAACTTTAATTCTATGTCTTGATCTTTTGTATCTTAAATCTCTATTCCCTTCAGAA  
TTATCAGATTTTCTATTTCC

In100 candidate131 (in intron):

LOCUS ENSG00000166510

DESCRIPTION Coiled-coil domain-containing protein 68 (Cutaneous T-cell lymphoma-associated antigen se57-1) (CTCL tumor antigen se57-1).

[Source:Unipro/SWISSPROT;Acc:Q9H2F9]

GAAAATTTCTGCTTAACTCTACCGAAATTATTTACTTTCTTTCTGGTTTTGCATATCTTTCATCATCTTAATTTACAGCT  
CTGACACTCATCTTATATTT

In100 candidate132 (in intron):

LOCUS ENSG00000196628

DESCRIPTION Transcription factor 4 (Immunoglobulin transcription factor 2) ITF-2) (SL3-3 enhancer factor 2) (SEF-2). [Source:Uniprot/SWISSPROT;Acc:P1584]

CTTCTTCTCCCTACTAAATCTTATCTAGAGTTTAACTATCTATTAATCATTCATTTTTGCACATTTTACAGCTTTTGTG  
GGGTATTTTACATTCTTTCT

In100 candidate133 (in intron):

LOCUS ENSG00000196628

DESCRIPTION Transcription factor 4 (Immunoglobulin transcription factor 2) ITF-2) (SL3-3 enhancer factor 2) (SEF-2). [Source:Uniprot/SWISSPROT;Acc:P1584]

TATGTTCTAATTTTCTAGCTCTAATGTCATAGCTAACAAAGGCCATCTCTACTTAATTGCTTGTACTTTATTCTCAGGC  
TTTTATGTTTTAACCTTTGC



In100 candidate134 (in intron):

LOCUS ENSG00000196628

DESCRIPTION Transcription factor 4 (Immunoglobulin transcription factor 2)

ITF-2) (SL3-3 enhancer factor 2) (SEF-2). [Source:Uniprot/SWISSPROT;Acc:P1584]

ACTTTTAAAATTTAATTGATTGAAATAGTTTTATTTGCTAACATAGCAAAATGTTCTCCTTTTTTCCAGATCACTGACAA  
TTTCTGCATTTTCTATGTTT

In100 candidate135 (in intron):

LOCUS ENSG00000196628

DESCRIPTION Transcription factor 4 (Immunoglobulin transcription factor 2)

ITF-2) (SL3-3 enhancer factor 2) (SEF-2). [Source:Uniprot/SWISSPROT;Acc:P1584]

ATTATATTTTAAATATGCCTGAAGTCGTGAACATACTAATGTTGATCATTTAGTCTTCTGGTCCTATCTCAGGAATATTA  
TTGCCCTTCTTAATTCATCT

In100 candidate136 (in intron):

LOCUS ENSG00000091157

DESCRIPTION WD repeat protein 7 (TGF-beta resistance-associated protein TRA)

(Rabconnectin-3 beta). [Source:Uniprot/SWISSPROT;Acc:Q9Y4E6]

TGGACTTGTTAATTCAATGTTTGTCAATAATTAACATTTATTGTCACTTGTCTACTTTTTTTTATACAGTTTATTTTTTT  
TGACACTTGATTTTGCGGTT

In100 candidate137 (in intron):

LOCUS ENSG00000091157

DESCRIPTION WD repeat protein 7 (TGF-beta resistance-associated protein TRA)

(Rabconnectin-3 beta). [Source:Uniprot/SWISSPROT;Acc:Q9Y4E6]

TTCTATATGACTTTTCTTTTAACTGTAATAATTTTATTTTTTTAAATTTTATCTGTTTACAGTTTTTTTAAAAGTCCATT

TAATCTCTCAGTCTTGTTTT

In100 candidate138 (in intron):

LOCUS ENSG00000183067

DESCRIPTION IGSF5 protein (Fragment). [Source:Uniprot/SPTREMBL;Acc:Q9NSI5]

EXON

TTGTATGATTGAGAACAATTTTTATATGTTTTTATAACTTGTCATTCTATATCTTTTGCTCATTATTTTCTCTCTCAGAT

TTTTGGGCTTTTTACTCCTT

In100 candidate139 (in intron):

LOCUS ENSG00000171587

DESCRIPTION Down syndrome cell adhesion molecule precursor (CHD2).

[Source:niprot/SWISSPROT;Acc:O60469]

AGTTTGTTGGTGTATAACTGTTTCATATTAGCTTTTTATAATCCTTCGTATTTCTGTTGTATCAGGTGTAATGTTTCTCCT

TTTATTTCTGATTTTGTCTT

In100 candidate140 (in intron):

LOCUS ENSG00000171587

DESCRIPTION Down syndrome cell adhesion molecule precursor (CHD2).

[Source:niprot/SWISSPROT;Acc:O60469]

CGTTTTTATTAAC TTGTCCTTTTGCTTTCCTCATGCATATTTTATTGGCTTTTTTCTAGTTCTTTCAGTTGGATGCTTA  
TGTCATTTATTTTCATCCTT

In100 candidate141 (in intron):

LOCUS ENSG00000176635

DESCRIPTION HORMA domain containing 2

[Source:RefSeq\_peptide;Acc:NP\_689723]EXON

AATGAGATATGGCATAACTCTAATTTTCATTTTGGCCAACTAAATTCTCCCTCTTTTCGTGTTTTTATAGATTTTCAGAG  
CTTTACCTCTTTACTTCTCT

In100 candidate142 (in intron):

LOCUS ENSG00000176635

DESCRIPTION HORMA domain containing 2

[Source:RefSeq\_peptide;Acc:NP\_689723]EXON

TCCTGAGCCCTCTATCCTTTTAATGTTTTCCCTCTAACTTCACTGCGGCTTTTGGTCTTGCTCAGATCATTCATTTTCTG  
AAGTAGCCTCAT TGCTTCTC

In100 candidate143 (in exon):

LOCUS ENSG00000170113

DESCRIPTION Non-imprinted in Prader-Willi/Angelman syndrome region protein .

[Source:Uniprot/SWISSPROT;Acc:Q7RTP0]

TAAAAATCTTAAATCCTCTCAATGGATGGTTAACAAATGCTCAAAGTCCATTACTCTTTTTATTGGCTCTTGCAGGTTTT  
GTGTTTTATCATCAGTGCTT

In100 candidate144 (in intron):

LOCUS ENSG00000166562

DESCRIPTION Microsomal signal peptidase 21 kDa subunit (EC 3.4.-.-) (SPase 1

kDa subunit) (SPC21) (SEC11-like 3). [Source:Uniprot/SWISSPROT;Acc:Q9BY50

TATTTATTTTCCTATTTTGATTTATTGCACCAAATACATTAACAATTATCTTAATTCATTTATGTCCTCACTTTCAGTT  
GTATCCTTCATTATTGCCTC

In100 candidate145 (in intron):

LOCUS ENSG00000141956

DESCRIPTION PR domain zinc finger protein 15 (PR domain-containing protein 5)  
(Zinc finger protein 298). [Source:Uniprot/SWISSPROT;Acc:P57071]

TATTATTTGCTTTTTATACTTTTCATTCTGTGCCTTTCTAACAAGTTGGATGCTTAACTCATTACTTCCAGCTGTTT  
TTTTCTCATGTAAGCATTTTC

In100 candidate146 (in intron):

LOCUS ENSG00000074695

DESCRIPTION ERGIC-53 protein precursor (ER-Golgi intermediate compartment 5  
kDa protein) (Lectin, mannose-binding 1) (Gp58) (Intracellular mannose- specific  
lectin MR60). [Source:Uniprot/SWISSPROT;Acc:P49257]

ACTAACTTAGGTTTGGATCTTGTCTTGCCAGTTACTGCTATATGGTCTTGTGCAAGTCACTGAACCTCTGTAATGCTTC  
ATTTCTTTTTTTTTTTTTTTT

In100 candidate147 (in intron):

LOCUS ENSG00000168952

DESCRIPTION Syntaxin-binding protein 6 (Amisyn).

[Source:Uniprot/SWISSPROT;cc:Q8NFX7]

TTGTCTTTTCAAGGCCACTTAGTGCTTAACTCAAGTACCCACTTTCCATCTCTTTAGTTGTCTGTTACCCTTCTACAGAA  
TCCTCTTTAGTTTCTGCATT

In100 candidate148 (in intron):

LOCUS ENSG00000168952

DESCRIPTION Syntaxin-binding protein 6 (Amisyn).

[Source:Uniprot/SWISSPROT;cc:Q8NFX7]

AGAGAAATGAGGAAGAAAATGAGTAACAACCTCTCAACATTTAGCTTTTTTTTACACATCCAGATATTGCTTTTAATTACT  
TTTTTTTCTTATGCTTTAAG

In100 candidate149 (in intron):

LOCUS ENSG00000168952

DESCRIPTION Syntaxin-binding protein 6 (Amisyn).

[Source:Uniprot/SWISSPROT;cc:Q8NFX7]

CTTCTCCCATTTACATAACATGCAAGTGAAGTGTCTTTCTGTCTTTCTTCATTGGTCTTTGTTCCCTCTTCTACCAGTT  
CTACTTTCCTGACTTGTTGC

In100 candidate150 (in intron):

LOCUS ENSG00000168952

DESCRIPTION Syntaxin-binding protein 6 (Amisyn).

[Source:Uniprot/SWISSPROT;cc:Q8NFX7]

CACTCTTATAGCTGCCTCTTTGATATATTGTCCTGACTTAACTTCCATTGTGCCAAATTCACCTTGCTTTTTTCAGTTTCC  
TTAGCAGGTTTCCTTTACCTT

In100 candidate151 (in intron):

LOCUS ENSG00000101542

DESCRIPTION Cadherin-20 precursor. [Source:Uniprot/SWISSPROT;Acc:Q9HBT6]

CTCTTAGGGAGTCATAACTTAAATGATTCTGATTTCTCTAGCTCTTACTCATCAGCTTTCTCTTTAATTCCTAATTCCTA  
AATAGCCATCCTGAATCTCT

In100 candidate152 (in intron):

LOCUS ENSG00000184304

DESCRIPTION Serine/threonine-protein kinase D1 (EC 2.7.11.13) (nPKC-D1)

(Prtein kinase D) (Protein kinase C mu type) (nPKC-mu).

[Source:Uniprot/SWISSPOT;Acc:Q15139]

TAAAAACATTTACCTTTTCCTCATTTCCCTGTCAATTCATAACCTTAGTTACTTTAACTTTTTACATTTTACATCTCAGTT  
ACTCTGCTCTGAATTTCTTA

In100 candidate153 (in intron):

LOCUS ENSG00000184304

DESCRIPTION Serine/threonine-protein kinase D1 (EC 2.7.11.13) (nPKC-D1)

(Prtein kinase D) (Protein kinase C mu type) (nPKC-mu).

[Source:Uniprot/SWISSPOT;Acc:Q15139]

TCTTCTCTAAAGTTAATGATTCTTAACTTTTGGTTAACTTTTTTAGTTGCTGTCATAGCCTTCATTTTGTTTCAGTACCT  
GTGTCTATTATTTTAAATT

In100 candidate154 (in intron):

LOCUS ENSG00000197563

DESCRIPTION GPI ethanolamine phosphate transferase 1 (EC 2.-.-.-)

(Phosphatidylinositol-glycan biosynthesis class N protein) (PIG-N) (MCD4 homolog). [Source:Uniprot/SWISSPROT;Acc:O95427]

TAGGATGTGCAAGTCATTGTTCTAAGCTAACTCTTGTTTATCTTTCATTTGCTTTTATTGTATTGGATTTTTCCTCAGTT  
ATCTCTGTTTCTTCAGTTGA

In100 candidate155 (in intron):

LOCUS ENSG00000092108

DESCRIPTION Sec1 family domain-containing protein 1 (Syntaxin-binding protein 1-like 2) (Sly1p). [Source:Uniprot/SWISSPROT;Acc:Q8WVM8]

CATGACGTGTTAATTTGGATGGGAATATTTAATTGATATTTGATATAACATGACTTGTCTTCCATTGATTTTCAGTCATG  
TAAATATTTTACTTTTTCTT

In100 candidate156 (in intron):

LOCUS ENSG00000114062

DESCRIPTION Ubiquitin-protein ligase E3A (EC 6.3.2.-) (E6AP ubiquitin-protein ligase) (Oncogenic protein-associated protein E6-AP) (Human papillomavirus E6-associated protein) (Renal carcinoma antigen NY-REN-54).

[Source:Uniprot/SWISSPROT;Acc:Q05086]

AGACTCTTCCCATAATAACTTTATTTAGACTTCCGAATTCTGTTTTTCTTGTTTATGTTTCTATAACAGATGTTACTTTT  
TTCTGGACCTGTTATTACTA

In100 candidate157 (in intron):

LOCUS ENSG00000184792

DESCRIPTION Oxysterol-binding protein 2 (Oxysterol-binding protein-related  
rotein 4) (OSBP-related protein 4) (ORP-4). [Source:Uniprot/SWISSPROT;Acc:Q69R2]  
GCTGTGTCCTGTTTTACACATGATGGATGTAACCCTACAATACACTTTGTTTTCTCTTTGTTTTCTTGCTTTATACAGTT  
ATCTTTTTTTTTTTTTTTTTTTT

In100 candidate158 (in intron):

LOCUS ENSG00000196792

DESCRIPTION Striatin-3 (Cell-cycle autoantigen SG2NA) (S/G2 antigen).  
[Source:Uniprot/SWISSPROT;Acc:Q13033]

TTGAACATACTGACATATTCTTTGAAAAGAAATTTAGAACTCATATCTAACAATCCCTCCCCTTGTGTTTCCTTACAGCT  
TTCTTTTCAAACTTTTTTTTT

In100 candidate159 (in intron):

LOCUS ENSG00000081913

DESCRIPTION PH domain leucine-rich repeat-containing protein phosphatase (E  
3.1.3.16) (PH domain leucine-rich repeat protein phosphatase) (Pleckstrin  
omology domain-containing family E protein 1) (Suprachiasmatic nucleus circadian  
oscillatory protein) (hSCOP). [Source:Uniprot/SWISSPROT;Acc:O60346]  
GAAAGTATGTATTTCTAGAGACTTTGAGATAACATTTAACATTCTGGCTATTTAACTTCTTCCTTTTCTTCCTTTCAGTT  
TCTCTCTTCCAGTTTCTGC

In100 candidate160 (in intron):



LOCUS ENSG00000206187

DESCRIPTION CDNA FLJ42943 fis, clone BRSTN2003835.

[Source:Uniprot/SPTREMBLAcc:Q6ZV66]

AGAAATACGATCTATTTTCGGGATCGCTTGATGCCCCGATAACATTCCTAGATTGCTGTTACCCAGGGTTTTTTTATTTT  
TATTTTTATTTTTCCCATAT

In100 candidate161 (in intron):

LOCUS ENSG00000166206

DESCRIPTION Gamma-aminobutyric-acid receptor subunit beta-3 precursor (GABAA)  
receptor subunit beta-3). [Source:Uniprot/SWISSPROT;Acc:P28472]

TTAATGCCTAATTTAAGTAATACTTTTAATATTAATTTAATAACAAATTAAACATTATTTTTTTGTCAGGCATATACTTT  
ATATCACATTTTTGTGTTTC

In100 candidate162 (in intron):

LOCUS ENSG00000092148

DESCRIPTION E3 ubiquitin-protein ligase HECTD1 (HECT domain-containing protein  
1) (E3 ligase for inhibin receptor) (EULIR).

[Source:Uniprot/SWISSPROT;Ac:Q9ULT8]

TCTGTTTACCCTGTTGGTTATGATAACTTGGATCACTTGCTTAAGTTTTTCTCTCCAGGTTTCTCTACTGTAAAGTTGT  
AAAGTTGCTCTTTTCCTTTT

In100 candidate163 (in intron):

LOCUS ENSG00000182256

DESCRIPTION Gamma-aminobutyric-acid receptor subunit gamma-3 precursor  
(GAB(A) receptor subunit gamma-3). [Source:Uniprot/SWISSPROT;Acc:Q99928]

CTTCCATTCTGTAGGCTGTGTCTTAACTCTGCTAATTGTTTCCTTTGTTGTACAGAATCTTTTTAGTTTGATGTAATCCA

ATTGTCTATTTTGCTTTT

In100 candidate164 (in intron):

LOCUS ENSG00000182256

DESCRIPTION Gamma-aminobutyric-acid receptor subunit gamma-3 precursor

(GAB(A) receptor subunit gamma-3). [Source:Uniprot/SWISSPROT;Acc:Q99928]

CATTAACATATTAAATAATTATTTAAATACCCTCTTTCCTATCTGGTTCTGTTCTTAGTAATTATTTGCCTTTTCAGGC

TGCTATTTTGGTTTTTGTA

In100 candidate165 (in intron):

LOCUS ENSG00000151413

DESCRIPTION Nucleotide-binding protein-like.

[Source:Uniprot/SWISSPROT;Acc:8TB37]

GGCATTTTGGTCACTATAACAAGTGTAATTTTGTGTTTAGCCCTTGTTATAGATATCTTTTTCTTATCTCAGTATGTCAT

TCATATTTTCTAACTTGCT

In100 candidate166 (in intron):

LOCUS ENSG00000151413

DESCRIPTION Nucleotide-binding protein-like.

[Source:Uniprot/SWISSPROT;Acc:8TB37]

AGATAACAATTTTTTTCCTGATTCTTTTATTATCTGTCTTATTCTTTGTATTTAGTAAATTTTCTTACAATCATTT

ATTATTATTTTTTTTTTTTTT

In100 candidate167 (in intron):

LOCUS ENSG00000151413

DESCRIPTION Nucleotide-binding protein-like.

[Source:Uniprot/SWISSPROT;Acc:8TB37]

CTTAGCAAGTTGCAAAGTGCTGAAGTTGATAACATGGGAACTAGGTTGTTTTATGTGTTTCATTTCTTTCTCCAGTTCTTA  
ATCCTATTTCTCACCGATAT

In100 candidate168 (in intron):

LOCUS ENSG00000104044

DESCRIPTION P protein (Melanocyte-specific transporter protein) (Pink-eyed  
dilution protein homolog). [Source:Uniprot/SWISSPROT;Acc:Q04671]

AGTTTTGGTATCATTGCTTTTCTCTAACATTTTTTCCATTTTCTATTTTCATTGATTTCTACTCCAGTCTTTATTATTTCT  
TTTCTTCTACTTATTTTGGG

In100 candidate169 (in intron):

LOCUS ENSG00000104044

DESCRIPTION P protein (Melanocyte-specific transporter protein) (Pink-eyed  
dilution protein homolog). [Source:Uniprot/SWISSPROT;Acc:Q04671]

AGCCTGGAATTCTTGTTTAAAAAATAGCACCTTTATAACTTTCATCACATTTCTTTTTCTCACAGAAAACCTTTTTTATC  
CTTTGCCACTTTTTATTTTA

In100 candidate170 (in intron):

LOCUS ENSG00000100852

DESCRIPTION Rho GTPase-activating protein 5 (p190-B).

[Source:Uniprot/SWISSPROT;Acc:Q13017]

TTTTTTATTTTTAACTTCTTTTTTAAATTGTTTTCTGTCTTATTCAGGCCCTGAATATTTTCCTCCTCTTTATATTAGC

AATTACCAACTTGTATTCCT

In100 candidate171 (in intron):

LOCUS ENSG00000151320

DESCRIPTION A-kinase anchor protein 6 (Protein kinase A-anchoring protein 6 (PRKA6) (A-kinase anchor protein 100 kDa) (AKAP 100) (mAKAP)).

[Source:Unipot/SWISSPROT;Acc:Q13023]

GCATCTTTTCATATGTTTAACGATCATTTGTGTTACTTGTTCTATGAACTGTGCTCATATCCTTTCCCTATTTTTCAGTT  
GTGTTGTTGGTCTTTTCTTT

In100 candidate172 (in intron):

LOCUS ENSG00000151320

DESCRIPTION A-kinase anchor protein 6 (Protein kinase A-anchoring protein 6 (PRKA6) (A-kinase anchor protein 100 kDa) (AKAP 100) (mAKAP)).

[Source:Unipot/SWISSPROT;Acc:Q13023]

AGGTTGTATTAACTATTGATAACCCCTTTATATATTTAGTTCCCCATACCAGTTCTTTTTGTTCGGCCGTCTACTTTTGG  
CCACACATTTTTCCTCTTT

In100 candidate173 (in intron):

LOCUS ENSG00000151320

DESCRIPTION A-kinase anchor protein 6 (Protein kinase A-anchoring protein 6 (PRKA6) (A-kinase anchor protein 100 kDa) (AKAP 100) (mAKAP)).

[Source:Unipot/SWISSPROT;Acc:Q13023]

ATGATATGGCCTCTTTGTAACCAATGAGCACTCTCTTTTCAAATACAGTATTACAGGGTTTCTTACTTGGCATCCTTAT  
GTTAGCCTCTACTTCCTTCT

In100 candidate174 (in intron):

LOCUS ENSG00000128731

DESCRIPTION HECT domain and RCC1-like domain-containing protein 2.

[Source:niprot/SWISSPROT;Acc:O95714]

CTAACCCATGAACATAGTGTTTCTCTTTATTTTTTAGGTGTTTAGTTTCTCTCAGCAATGTTTCTAGTCCCAGTATTGT  
GTAGGTTTTTTTTTTTTTTTTT

In100 candidate175 (in intron):

LOCUS ENSG00000128731

DESCRIPTION HECT domain and RCC1-like domain-containing protein 2.

[Source:niprot/SWISSPROT;Acc:O95714]

AGTCATTATTGGTTTTGCCCATGAACCATAACATTGCAATGTTGCTCTTCCCTCATATTTTTAGGCAGGGATTCCTTCTG  
TCTTTCCTTAGTATTTATCT

In100 candidate176 (in intron):

LOCUS ENSG00000151322

DESCRIPTION Neuronal PAS domain-containing protein 3 (Neuronal PAS3) (Member of PAS protein 6) (Basic-helix-loop-helix-PAS protein MOP6).

[Source:Uniprt/SWISSPROT;Acc:Q8IXF0]

AGAGACCTAACATAATATGTCCCTTTTGATTCTTGACAGTTCCATGGTTTTCTCTTACCTTCTCAAAGAAGTGGCTTT

CCTTCTACTTTTTATTGCTA

In100 candidate177 (in intron):

LOCUS ENSG00000151322

DESCRIPTION Neuronal PAS domain-containing protein 3 (Neuronal PAS3) (Member of PAS protein 6) (Basic-helix-loop-helix-PAS protein MOP6).

[Source:Uniprot/SWISSPROT;Acc:Q8IXF0]

AGTATTATAACAAGAATAAAACTTTTTCTCTTTCTGTTATTCCTGGATTGGGTATTTCTAGCCTTTCAGCCTAACTT  
AACTGTATCCTTGCCATTTT

In100 candidate178 (in intron):

LOCUS ENSG00000151322

DESCRIPTION Neuronal PAS domain-containing protein 3 (Neuronal PAS3) (Member of PAS protein 6) (Basic-helix-loop-helix-PAS protein MOP6).

[Source:Uniprot/SWISSPROT;Acc:Q8IXF0]

AGCCTAACTTAACTGTATCCTTGCCATTTTGAGTAAACCTTTTATTTATTTTATGTCCTCCCCAGTCTGTCCTTCTATCC  
ATATCTTATACTTTCTTCAA

In100 candidate179 (in intron):

LOCUS ENSG00000151322

DESCRIPTION Neuronal PAS domain-containing protein 3 (Neuronal PAS3) (Member of PAS protein 6) (Basic-helix-loop-helix-PAS protein MOP6).

[Source:Uniprot/SWISSPROT;Acc:Q8IXF0]

AATAACTGGGCCCAATGAGTCTCAATTAGTAGCTGCATTTTCTTCTTTATTTCTTCTTTGACTCTATTTCCCGACAGTC  
TGCTTTGTTCTTTTCTTCT

In100 candidate180 (in intron):

LOCUS ENSG00000129518

DESCRIPTION E2F-associated phosphoprotein (EAPP).

[Source:Uniprot/SWISSPROT;Acc:Q56P03]

TTTGTTCATAACCACCTCACTGTTTTGTTTTGTTTTCTTGATTACTTCCTTCTTTTCTGGCACTAAAAGATGCTCCAGGT  
TCATCTTGTGTTTCCTTATTC

In100 candidate181 (in intron):

LOCUS ENSG00000198604

DESCRIPTION Bromodomain adjacent to zinc finger domain protein 1A (ATP-utilizing chromatin assembly and remodeling factor 1) (hACF1) (ATP-dependent chromatin remodelling protein) (Williams syndrome transcription factor-related chromatin-remodeling factor 180) (WCRF18 [Source:Uniprot/SWISSPROT;Acc:Q9NRL]

GCTTTTTCTTATTTTAAAACTTGTCGTGAGGACCTTGATATTTGTAACCATTTGGACTGATCATTTTCTAAACCTCAGGA  
TCTCTGTTACTCCACTTTGT

In100 candidate182 (in intron):

LOCUS ENSG00000179676

DESCRIPTION CR020\_HUMAN Isoform 2 of Q7Z4B0 - Homo sapiens (Human)

[Source:Ensembl/Ensembl;Acc:Q7Z4B0-2]

AATTCCAAATGTTTCATGGGGAAAATTGAAATTTTTGTTTCTTTTCATAACATTTCCCATGTTTCATAAATTTTTCCAGAT  
ACTCATTGATCTCTTTTATA

In100 candidate183 (in intron):

LOCUS ENSG00000081138

DESCRIPTION Cadherin-7 precursor. [Source:Uniprot/SWISSPROT;Acc:Q9ULB5]

GTGACCAAAACAATATTCGAATGATTAACATCTTATAATATATGTATATTTTTCTCAGTGCTGCTCTCTTCACACTGTCT  
ATGGCTTCCAATTTATGTTT

In100 candidate184 (in intron):

LOCUS ENSG00000100883

DESCRIPTION Signal recognition particle 54 kDa protein (SRP54).

[Source:Unirot/SWISSPROT;Acc:P61011]

AAAGCAAGAATTCCATTTTATGGAAGGTAGGTTACTGTTTTTTATTTTAACACTTATATCCCTCTTCTTGTCTGTCAGCT  
TTTTTTTTTTTTTTTTTTTG

In100 candidate185 (in intron):

LOCUS ENSG00000166479

DESCRIPTION Protein disulfide-isomerase TXNDC10 precursor (EC 5.3.4.1)

(Thiredoxin domain-containing protein 10) (Thioredoxin-related transmembrane  
prtein 3). [Source:Uniprot/SWISSPROT;Acc:Q96JJ7]



AATGTAACCAAATAATTCTGTATTATTTTCTCTCCCCTGAGATGTGCCTCCCTCCCTTTTTAATTTTCCAGGATAACTG  
TCTTTATTTTATTGTTATTT

In100 candidate186 (in intron):

LOCUS ENSG00000092020

DESCRIPTION Serine/threonine-protein phosphatase 2A regulatory subunit B''  
ubunit gamma (Protein phosphatase subunit G5PR) (Rhabdomyosarcoma antigen MRMS-  
40.6A) (Rhabdomyosarcoma antigen Mu-RMS-40.6C).

[Source:Uniprot/SWISSROT;Acc:Q969Q6]

AAAGGAAGGTACCTGTACTTGTACTTTGTGTGCTTTCTTGACCCCTTAACTCTTAAACCCACTGCATTCTTTTAGCAGAT  
ATTTATTGCATGCCTGTTTT

In100 candidate187 (in intron):

LOCUS ENSG00000150636

DESCRIPTION Coiled-coil domain-containing protein 102B.

[Source:Uniprot/SWISPROT;Acc:Q68D86]

GATTATAGTTGTGAGATAACAAAATGTTCTCCCTACCAAATGTTTTGCCTTTCCTTATTCTGATATCAGGGGCTTTATTT  
CTGTTTATTAGACTGTTTTT

In100 candidate188 (in intron):

LOCUS ENSG00000100890

DESCRIPTION Uncharacterized protein KIAA0391.

[Source:Uniprot/SWISSPROT;AccO15091]

AGGTCTTCTAACCCGTGCATTCATTCCTTTTTCTACTATTCCATGTTGCTACAGCCTTCCTGTTTCCCTTTTTTATCAACA  
TTTTATTTAAAAATTTTCA

In100 candidate189 (in intron):

LOCUS ENSG00000100890

DESCRIPTION Uncharacterized protein KIAA0391.

[Source:Uniprot/SWISSPROT;AccO15091]

CGTTTTTTTAGTGGGTAACACTATAGAGATACTTTTAAAGTTTTTTCGTATATTATCTGTTTTATTGTCTTCTCAGCACTT  
CTTAAACATCTTATTTATTT

In100 candidate190 (in intron):

LOCUS ENSG00000100890

DESCRIPTION Uncharacterized protein KIAA0391.

[Source:Uniprot/SWISSPROT;AccO15091]

AGTGACTAAGTCTGCTCAATTCTGCTTTACTAACTCACAAAGAGCTCTGTTCTTTTCATTTTTACTGCCAGTTTTCTCAT  
TATCTCTTGCCTGAATTACT

In100 candidate191 (in intron):

LOCUS ENSG00000198089

DESCRIPTION spindle assembly associated Sfi1 homolog isoform b

[Source:RefSeq\_peptide;Acc:NP\_055590]

TTTTTCTTTTTTTGCCCTAACATTACAACAAATATTTACCCTTTCTGTTGCCTTTTTTCTTTCTTCTCACATCTCCAGGT  
TTCTATCTGTGATAATTTTC

In100 candidate192 (in intron):

LOCUS ENSG00000206052

DESCRIPTION Docking protein 6 (Downstream of tyrosine kinase 6).

[Source:Unprot/SWISSPROT;Acc:Q6PKX4]

CATTCTACCCTGAGAAGTTGTAGTAGAGATCTGAAGGTACTGAATCTTAACAAGTTATAAATATTTTTTATTACAGCC  
TGTTTTCCCTGTAAACTTT

In100 candidate193 (in intron):

LOCUS ENSG00000206052

DESCRIPTION Docking protein 6 (Downstream of tyrosine kinase 6).

[Source:Unprot/SWISSPROT;Acc:Q6PKX4]

TTCAC TTTGGAAATGATGAAAACCTTAACCCCTGAAATAGCTCGGGTTTTATTTTGTCTTGTGTCTTCATTTGTACAGGT  
TCTCTTAATTCTATACCGTG

In100 candidate194 (in intron):

LOCUS ENSG00000206052

DESCRIPTION Docking protein 6 (Downstream of tyrosine kinase 6).

[Source:Unprot/SWISSPROT;Acc:Q6PKX4]

GATAACATTGCATAGAGCTCTTAGGTTGTAATATTTTCTTACTTCCTCACAGTGCTATCACTAAGCCTTATATTGTATTC  
ATTTCTTCTTACTATTCATT

In100 candidate195 (in intron):

LOCUS ENSG00000160207

DESCRIPTION Heat shock factor 2-binding protein.

[Source:Uniprot/SWISSPROT;cc:O75031]

CTGATTACTGTAGCGACATAGTAAGCCTTAACACTGGATAAAATGATTCTTCCCATTTCATTCCTCTTTTCAGAGTTGC  
CCTAACTATTCTAGCTTCTT

In100 candidate196 (in intron):

LOCUS ENSG00000160207

DESCRIPTION Heat shock factor 2-binding protein.

[Source:Uniprot/SWISSPROT;cc:075031]

TATTATTGTGGTTTGGTGGTGATCTGTAGTGGTAACATTTAAGTTTTTCTTTTTTCTGTGTTTGCTCTACCAGTGGTT  
TTTATATTTTCATATGTTTT

In100 candidate197 (in intron):

LOCUS ENSG00000150637

DESCRIPTION CD226 antigen precursor (DNAX accessory molecule 1) (DNAM-1).

[ource:Uniprot/SWISSPROT;Acc:Q15762]

GGCTTTGTCGGGTGTGTTTTTATCTCTTTATTGTAACACTCTTCCCACTTTATCTGTGCCTTTCAGTTAAGCGGTCT  
TTTAGCTTATTTTTTATCTT

In100 candidate198 (in intron):

LOCUS ENSG00000150637

DESCRIPTION CD226 antigen precursor (DNAX accessory molecule 1) (DNAM-1).

[ource:Uniprot/SWISSPROT;Acc:Q15762]

CTCACACTTTCCTACTTTCTCCTTTTTCTAACTGACTAAGTTTCCATCACATTTGCTTTCCTTATAGAGTTTCAGCC  
GTCTCAATGTCTATGTTTTT

In100 candidate199 (in intron):

LOCUS ENSG00000176225

DESCRIPTION rotatin [Source:RefSeq\_peptide;Acc:NP\_775901]

GCCTCTCTTTAACTTTTTTCTCCTGTTTTATTTCTGCCAATATTTATTATCTCCTTCTACTTTTAGTTTAGTTTACAGCT  
CTTTTTTCTAACATTTTAAG

In100 candidate200 (in intron):

LOCUS ENSG00000176225

DESCRIPTION rotatin [Source:RefSeq\_peptide;Acc:NP\_775901]

GTGAGGTCCCACTCCATGGAGTGCATGCTTGTTCAAGTTCCTAGCATGGTAACTGGTAGACCATTCTTTTGAGTCCAGAA  
GTATGTTTGCTTCCTCCTTC

In100 candidate201 (in intron):

LOCUS ENSG00000170677

DESCRIPTION Suppressor of cytokine signaling 6 (SOCS-6) (Suppressor of  
cytoine signaling 4) (SOCS-4) (Cytokine-inducible SH2 protein 4) (CIS-4).

[Soure:Uniprot/SWISSPROT;Acc:O14544]

TTTTGAACTTTCTGAGATAATTTTAGTGTGTCCTTTCCATATATAACATATTATTGTTGTTTTTTTTTTTAAATCAGAT  
CTTAAAATGTTTTTCTTCTA

In100 candidate202 (in intron):

LOCUS ENSG00000166342

DESCRIPTION Neuropilin and tolloid-like protein 1 precursor  
(Brainspecifictransmembrane  
protein containing 2 CUB and 1 LDL-receptor class A  
domains potein 1). [Source:Uniprot/SWISSPROT;Acc:Q8TDF5]

ACTGGAGAGCTAATATCCAAACCCACTCTTTATAACTTTAAATTCTTCTTGCTTCTTTTTACTCATACTGGGATTCAGAT  
TCTTCATTTTCATACTCAGTA

In100 candidate203 (in intron):

LOCUS ENSG00000166912

DESCRIPTION myotubularin related protein 10

[Source:RefSeq\_peptide;Acc:NP\_00232]

AGTACATTTTGAAGTAAATGTGAACGGCTGAAGGATAACATTAAATGATCCCATTTGTCTCTTTGTATTTGCCAGTCTCCT  
TTATTTTTTGCTATTCTTGGA

In100 candidate204 (in intron):

LOCUS ENSG00000160216

DESCRIPTION 1-acyl-sn-glycerol-3-phosphate acyltransferase gamma (EC 2.3.1.1)  
(1- AGP acyltransferase 3) (1-AGPAT 3) (Lysophosphatidic acid acyltransfrase  
gamma) (LPAAT-gamma) (1-acylglycerol-3-phosphate O- acyltransferase 3)

[Source:Uniprot/SWISSPROT;Acc:Q9NRZ7]

AGTTCTTGAACAAATAACTTTCAATTACAATTTTTTTTCTACTTATGATTGCCAGTTTTTCTTTTTTCTTTTTTTTTTTT  
TTTGAGACAGAGTCTTGCTC

In100 candidate205 (in intron):

LOCUS ENSG00000100170

DESCRIPTION Sodium/glucose cotransporter 1 (Na(+)/glucose cotransporter 1)  
High affinity sodium-glucose cotransporter).

[Source:Uniprot/SWISSPROT;Acc:13866]

CACTGATCACTTAGCTTTAACAATTGTCAACATTTTGCCATTTTGGTTCATCTATCCTCTTCCAATTTTTTCCCCAGCA  
GTATTTTATTTTATTTTATT

In100 candidate206 (in intron):

LOCUS ENSG00000169918

DESCRIPTION OTU domain-containing protein 7A (EC 3.-.-.-) (Zinc finger protein  
Cezanne 2). [Source:Uniprot/SWISSPROT;Acc:Q8TE49]

CTTTAACCCTGTGTTTCTTTATTTCTGTTTTGTCTACTTTACTTTTCATTTTATCATTCTTACTATGCTATCTGCAGTC  
TGTTTTCTCTTTTCTCCCTT

In100 candidate207 (in intron):

LOCUS ENSG00000183032

DESCRIPTION Mitochondrial 2-oxodicarboxylate carrier (Solute carrier family25  
member 21). [Source:Uniprot/SWISSPROT;Acc:Q9BQT8]

GTACTGAAGAGATTCTGGTGTGGTAATTGAATATAACAATTCTCGCTGAGCCTTTTTATGTTTATTCAGAGTTGATTTAA  
TTCTTTCCATAGTTTTGTCT

In100 candidate208 (in intron):

LOCUS ENSG00000150656

DESCRIPTION Beta-Ala-His dipeptidase precursor (EC 3.4.13.20) (Carnosine  
dieptidase 1) (CNDP dipeptidase 1) (Serum carnosinase) (Glutamate  
carboxypeptdase-like protein 2). [Source:Uniprot/SWISSPROT;Acc:Q96KN2]

GAGGAGGAGGAGATTCCTGCTGAATCTGAACTATTCTCTCCTAACAACAATCATTGTTTTTCATATTTTTTTCCTGCAGCT

TATTTTCCTTCTTCCAACGT

In100 candidate209 (in intron):

LOCUS ENSG00000175344

DESCRIPTION Neuronal acetylcholine receptor subunit alpha-7 precursor.

[Source:Uniprot/SWISSPROT;Acc:P36544]

AGTGATTGTCGATATAGTTGGATCAATAACTATCATATTTGTTACTGATTTTTTTGTTGTCCTTGTTTCCTTATTTTCAGTT

TTTGTTTTCCACTCTGACTT

In100 candidate210 (in intron):

LOCUS ENSG00000175344

DESCRIPTION Neuronal acetylcholine receptor subunit alpha-7 precursor.

[Source:Uniprot/SWISSPROT;Acc:P36544]

TTTTTTAGCTGTGTCTGTTTTGTTTCCTTTCTGTTTCTCATCTAACTACGTAATAATTTGTTTTGGTTCTCAGTTTATTTG

TTTAGCTCTGCAATGTTTCCT

In100 candidate211 (in intron):

LOCUS ENSG00000166540

DESCRIPTION zinc finger protein 407 [Source:RefSeq\_peptide;Acc:NP\_060227]

CCATTCTCCTGATTTTCCTTTGCCTGTTCCGTATTTTTTTTTTCTTGTTAACCTTCCTCTCCCTGTTCTGTTTCTTACAGTC

CTTTACTTTGTGGGTACTTT



In100 candidate212 (in intron):

LOCUS ENSG00000182090

DESCRIPTION Putative uncharacterized protein C14orf25.

[Source:Uniprot/SWISPROT;Acc:Q8IY25]

TATGTAACGGCCTTCTTTGTCTTTTTTGATCTTTGTTTATTTAAAGTCTGTTTTATCAGAGACTAAGATTGTAACCCCTG  
CTTTTTTTTGGCTTCCATTT

In100 candidate213 (in intron):

LOCUS ENSG00000182090

DESCRIPTION Putative uncharacterized protein C14orf25.

[Source:Uniprot/SWISPROT;Acc:Q8IY25]

ATTAATTCTTTCAAAAACATAACTACTGGATTTGTTTATCTTTTGTATGGCTTTTCACATCTCAATTCCTTCAGTTCAG  
CTCTGATTTTGGTTATTTCT

In100 candidate214 (in intron):

LOCUS ENSG00000182090

DESCRIPTION Putative uncharacterized protein C14orf25.

[Source:Uniprot/SWISPROT;Acc:Q8IY25]

TTAAGTCATACTATTTATTTTCTGTGAATTAACATTTGGGTTATTTTCTCTCTTTTTTGTGCCCCCTCTTAAGAACAGGG  
CTGCCCTAAATATTCCTTTTT

In100 candidate215 (in intron):

LOCUS ENSG00000182090

DESCRIPTION Putative uncharacterized protein C14orf25.

[Source:Uniprot/SWISPROT;Acc:Q8IY25]

CCATGAAGTTCTTGACACCTGGACACATACTGGTCTCTGCTTAACACACCAACACATCTGCTTCTGATCTTCTAGCAGTT

GTTTTCATTTTAGTTTCCAT

In100 candidate216 (in intron):

LOCUS ENSG00000182090

DESCRIPTION Putative uncharacterized protein C14orf25.

[Source:Uniprot/SWISPROT;Acc:Q8IY25]

AGATTTGTGGGCACTCATGAGGTTTTTTGTACTTTGGATTATAACCTAATATTAAATTTTGGCTTGAATTGTTCCAGCT  
TTGTTCCCTGTTCTGTTGCTT

In100 candidate217 (in intron):

LOCUS ENSG00000139865

DESCRIPTION Tetratricopeptide repeat protein 6 (TPR repeat protein 6).

[Souce:Uniprot/SWISSPROT;Acc:Q86TZ1]

TTAAGTCATACTATTTATTTTCTGTGAATTAAACATTTGGGTTATTTTCTCTCTTTTTTGTGCCCCCTCTTAAGAACAGGG  
CTGCCCTAAATATTCTTTTT

In100 candidate218 (in intron):

LOCUS ENSG00000184459

DESCRIPTION Bactericidal/permeability-increasing protein-like 2 precursor.

Source:Uniprot/SWISSPROT;Acc:Q8NFQ6]

GAAGGTTTACAAATGGCTGATTATGGTCTCTGAGTAACCTCTTTTTTTTTTTTTTTTTTTTTTCATTTTTTTCCTCAGTG  
TTCTGTATAACTCCTTTGCT

In100 candidate219 (in intron):

LOCUS ENSG00000101493

DESCRIPTION Zinc finger protein 516. [Source:Uniprot/SWISSPROT;Acc:Q92618]

EXON

TTCCTTTTTTGAGTGTTGCTGAATACTGGAGTAACTACACTTCTTAGGGCTTTTTCTTCCACTTGTTTCTG TTCAGCT  
GTTTCTTTTTTGTGGTGTAC

In100 candidate220 (in intron):

LOCUS ENSG00000100934

DESCRIPTION Protein transport protein Sec23A (SEC23-related protein A).

[Source:Uniprot/SWISSPROT;Acc:Q15436]

AGTATAATCATGAAGTCTTTAAATTGCATTAAACATAACTTCAA AATTACCAATGTCTTCTTTTACACATTCTCAGTC  
TTTTTTGCTTCTTACTGTTT

In100 candidate221 (in intron):

LOCUS ENSG00000186031

DESCRIPTION CDNA FLJ45135 fis, clone BRAWH3038252, highly similar to Formin1  
isoform IV. [Source:Uniprot/SPTREMBL;Acc:Q6ZSY1]

GGTTGATAACAAATTAAAAAAAATCTTTGTCATGTTCCACATCTTTGTTATCACTTTTTCTTGTTCTCTTCATCAGTT  
TTCTTCACTCTTGTCTTTTT

In100 candidate222 (in intron):

LOCUS ENSG00000206125

DESCRIPTION

CTAGAATAGAAGTGGAATAACATGCATTGATTAGTTCATTCATTTTTTCATTCATTTAAATTTTTTTACATTCAGTGCTG  
TTACTTATTTTTTGACACTTC

In100 candidate223 (in intron):

LOCUS ENSG00000198838

DESCRIPTION Ryanodine receptor 3 (Brain-type ryanodine receptor) (RyR3) (RY-3) (Brain ryanodine receptor-calcium release channel).

[Source:Uniprot/SWISPROT;Acc:Q15413]

CAACTGAGAATAGTTTGCTTTGTGTCTTAGATCATTAACAAAGGTGAGATTTTGTTCATTTAATGTTCTCCTCAGTCTG  
GGTTCATTTCCCTGTTTCCTT

In100 candidate224 (in intron):

LOCUS ENSG00000198838

DESCRIPTION Ryanodine receptor 3 (Brain-type ryanodine receptor) (RyR3) (RY-3) (Brain ryanodine receptor-calcium release channel).

[Source:Uniprot/SWISPROT;Acc:Q15413]

GCTTTGCCTTGGGAATGGAGGTTTCTAACCAATTCTGTGATGCTTCATTTTATTCACAGACTGGTGTTATTTAAAGTGTT  
TTTTGTTTTGTTTTGTTTTT

In100 candidate225 (in intron):

LOCUS ENSG00000133424

DESCRIPTION Glycosyltransferase-like protein LARGE1 (EC 2.4.-.-)  
(Acetylglucosaminyltransferase-like 1A). [Source:Uniprot/SWISSPROT;Acc:O95461]

TGAATTCTGTGAAAATTAACCTCCCCTGCCTTTTGGTGCTCTTTTTTTCTCTTTCTCTCTGAAGTTGCAGTTAATTTCCCC  
AATGGATTTCCTCAGTCTTT

In100 candidate226 (in intron):

LOCUS ENSG00000142185

DESCRIPTION Transient receptor potential cation channel subfamily M member  
(EC 3.6.1.13) (Long transient receptor potential channel 2) (LTrpC2) (LTrp-2)  
(Transient receptor potential channel 7) (TrpC7) (Estrogen- responsive  
lementassociated  
gene 1 protein). [Source:Uniprot/SWISSPROT;Acc:O94759]

TGTGATGTTTTTAACCTACTAATTCAATCTCTTTATGTGTTATAGGTCTATTTATATTTTCTATTTCTTCTCCAGTCACC  
TTTGGTAGTTTGTGTCTTTC

In100 candidate227 (in intron):

LOCUS ENSG00000150527

DESCRIPTION Cutaneous T-cell lymphoma-associated antigen 5 (cTAGE-5 protein  
(cTAGE family member 5) (Meningioma-expressed antigen 6/11).  
[Source:Uniprt/SWISSPROT;Acc:O15320]

TTCTTTCTTTCTGGGACTATAAAAATGGGTATTTTAACTTTTTATTATATCTCATCTGTCTCTTACGTTCTTTTCCAGGG  
TTTCCATCTTTTTGTGTTGCC

In100 candidate228 (in intron):

LOCUS ENSG00000169857

DESCRIPTION Cell death regulator Aven. [Source:Uniprot/SWISSPROT;Acc:Q9NQS1  
GTGATGTAAGCTATGCTAACAAGCCGTAATGTCCTTTTCTGCTAATTCATATCTGTGTCAGTTCTGGCATTATTTTGAT  
TGACTGATCATCTCTCTCTT

In100 candidate229 (in intron):

LOCUS ENSG00000180190

DESCRIPTION Uncharacterized protein C8orf42 (INM01).

[Source:Uniprot/SPTREML;Acc:Q86YL5]

TGTGAATGGCATTCTTTTTCTATTGTCTAACTGTAATAAAGCCATTTATTTTTTATTCTTTTATATTCAGCCATTTT  
TGTTAGGTCTAATCGTTCTT

In100 candidate230 (in intron):

LOCUS ENSG00000180184

DESCRIPTION

AGTCTTTTCAAAGAACTAACCATTGGTCTTGTTGATTTCTCTATTGTTTTTCTATTCTCTGTGTCAGTTATTTCTGCTCT  
AATCTTGATTATTTTCCTTTC

In100 candidate231 (in intron):

LOCUS ENSG00000166377

DESCRIPTION Probable phospholipid-transporting ATPase IIB (EC 3.6.3.1).

[Source:Uniprot/SWISSPROT;Acc:O43861]

AGTGTGCTGTACTGTGGCTTTATAGAAAATCTTAACATGGGTAGGCTAATTCTTCTTACTTTTTTCAGAAATCTTTAAGT  
TATTCTAGTTCCTTTGCCTT

In100 candidate232 (in intron):

LOCUS ENSG00000166377

DESCRIPTION Probable phospholipid-transporting ATPase IIB (EC 3.6.3.1).

[Source:Uniprot/SWISSPROT;Acc:O43861]

AGTATCATAAGAATTATCAAAATGTTAAGTTCTTAGAGCTTTAAGTAACATATTTCTGTGTTTTTAATTTTCTACAGTCT  
TACAGTTTTTTTTTTTAAACT

In100 candidate233 (in intron):

LOCUS ENSG00000165379

DESCRIPTION Leucine-rich repeat and fibronectin type-III domain-containing  
rotein 5 precursor. [Source:Uniprot/SWISSPROT;Acc:Q96NI6]

CCAATTTTGAGGCTGGGAAAAGGAAGCTACTTGAACTTCCTAAAGGCTTAACTGGCTAACCTATTAGCTTATTTTCAGTG  
ATTTTTATTTTCTGTTTACT

In100 candidate234 (in intron):

LOCUS ENSG00000165379

DESCRIPTION Leucine-rich repeat and fibronectin type-III domain-containing  
rotein 5 precursor. [Source:Uniprot/SWISSPROT;Acc:Q96NI6]

CCTGGATAAATACTTAACTGTATCTTCAACTCTTCTTTTAATTTTCATCTATTGTAATTCATGGTACTATTTTTTCCAGTT  
TGCTTTTTTATATATATTTCA

In100 candidate235 (in intron):

LOCUS ENSG00000165379

DESCRIPTION Leucine-rich repeat and fibronectin type-III domain-containing  
rotein 5 precursor. [Source:Uniprot/SWISSPROT;Acc:Q96NI6]

CTCTTCATTTATCCTTCTCCCACATTTTATGACTTAACCATTACTCATTTATTAGCTTAATTTTTATTTCCTCAGAAAAC  
CTTCTTCTTACTTCTCTGAT

In100 candidate236 (in intron):

LOCUS ENSG00000036448

DESCRIPTION Myomesin-2 (M-protein) (165 kDa titin-associated protein) (165 Da connectin-associated protein). [Source:Uniprot/SWISSPROT;Acc:P54296]

TCAAAAATCTAATAACTAGGATTGATATTTCCCTACAATTTGCAGGTATTCTTCCTCACAAGGATTCATGCATTATTGAC  
TTGCGATTTCCTTTCTTCCT

In100 candidate237 (in intron):

LOCUS ENSG00000100320

DESCRIPTION RNA-binding protein 9 (RNA-binding motif protein 9)  
(Hexaribonucleotide-binding protein 2) (Repressor of tamoxifen transcriptional activity. [Source:Uniprot/SWISSPROT;Acc:O43251]

CTCTTAACTGCATGTTATTTTTACTCCTTTCTCTTAACTAAATTTGTTTTCTTCTCAGGACTTTACATCCTCTATCTCC  
CTTCTAGTGGGTGGGTTTTT

In100 candidate238 (in intron):

LOCUS ENSG00000139915

DESCRIPTION MAM domain-containing protein 1 precursor (MAM domain-containing glycosylphosphatidylinositol anchor protein 2).  
[Source:Uniprot/SWISSPROT;cc:Q7Z553]

CAAATTCAATGACATCATATGATATTTGATTAACAAATATATTCATTTCTTAACAAATTTCTTATCAGTAAGCACTTAT  
TTTGTCTCAATCTTTATTTT



In100 candidate239 (in intron):

LOCUS ENSG00000139915

DESCRIPTION MAM domain-containing protein 1 precursor (MAM domain-containing glycosylphosphatidylinositol anchor protein 2).

[Source:Uniprot/SWISSPROT;cc:Q7Z553]

AGTTATAACCTTTCTTTTGTTTCTACTTAATCCTCAGACTATTTTGAAATCATTTCAAACCTTCTTTACTCTTTTTTTCC  
TTCGTGTATCCATGTTTACA

In100 candidate240 (in intron):

LOCUS ENSG00000139915

DESCRIPTION MAM domain-containing protein 1 precursor (MAM domain-containing glycosylphosphatidylinositol anchor protein 2).

[Source:Uniprot/SWISSPROT;cc:Q7Z553]

CTAAAACTTGCCTACTTCAAATCCAAAGAATTTAACCTTTTCTTTAACAAGTTCTTTATTTTTTCTATAGTCCACCAGCA  
CTCTTATTGTTACTTTACAT

In100 candidate241 (in intron):

LOCUS ENSG00000139915

DESCRIPTION MAM domain-containing protein 1 precursor (MAM domain-containing glycosylphosphatidylinositol anchor protein 2).

[Source:Uniprot/SWISSPROT;cc:Q7Z553]

GGTTTAGACAAATGTTTTTACTTTAGATTCTCATGGCACCAATTAACCTTAATAAGAGTATCTTTTTTATCAGAGTATAAA  
TTATTTATATTTCTTTTTCT

In100 candidate242 (in intron):

LOCUS ENSG00000139915

DESCRIPTION MAM domain-containing protein 1 precursor (MAM domain-containing glycosylphosphatidylinositol anchor protein 2).

[Source:Uniprot/SWISSPROT;cc:Q7Z553]

CTTCCAATCCATTAACCTGTGATATCTTCCAATTTAATTGTATCCTCTTCAGTTTTTCTCATCGATGTTTGATGGTTGA  
ATTGTATCCATCTTTCCCCT

In100 candidate243 (in intron):

LOCUS ENSG00000139915

DESCRIPTION MAM domain-containing protein 1 precursor (MAM domain-containing glycosylphosphatidylinositol anchor protein 2).

[Source:Uniprot/SWISSPROT;cc:Q7Z553]

AGTCCATAACACTGAATTACTTTTATTTTACTTTATTACTCAGCATGTCAGTTTTTTTTTTTTTTTAATTTTGTCTGT  
TTTTTAGCTTCTTGAAGTGG

In100 candidate244 (in intron):

LOCUS ENSG00000139915

DESCRIPTION MAM domain-containing protein 1 precursor (MAM domain-containing glycosylphosphatidylinositol anchor protein 2).

[Source:Uniprot/SWISSPROT;cc:Q7Z553]

AATCAAGATGTTAGTTCTAAGCTATTCTAATTATGTTCCCACTAACTACACTTCTTCATATTTCTTTACTTTAACAGAC  
TTGTTTCTGACATTATGTTT

In100 candidate245 (in intron):

LOCUS ENSG00000139915

DESCRIPTION MAM domain-containing protein 1 precursor (MAM domain-containing glycosylphosphatidylinositol anchor protein 2).

[Source:Uniprot/SWISSPROT;cc:Q7Z553]

AGACCATTAACATGGGATGTCTTCCACTTCTTGGTGTCTTCCTCAATTTTTTTTAACCAGTATTTTATAGTTTTCCTTA  
TAAAGATCTTTTACTTCCTT

In100 candidate246 (in intron):

LOCUS ENSG00000139915

DESCRIPTION MAM domain-containing protein 1 precursor (MAM domain-containing glycosylphosphatidylinositol anchor protein 2).

[Source:Uniprot/SWISSPROT;cc:Q7Z553]

ATAAGGTTCCAATTCAAGTGGTTTTTTTCCATATGCATAACCAATTGAATGGTATATATTTTTCTCTCTTCTGTGCAGAC  
ACTCTATATATTTTATATTT

In100 candidate247 (in intron):

LOCUS ENSG00000134146

DESCRIPTION ATP binding domain 4 [Source:RefSeq\_peptide;Acc:NP\_542381]

AACATTGTTTTAAATGGATATAACTGACAAATTATTATGCTCTTCTGCAATTTCTTTGTCATTTTACTTTCAGCCTTAAC  
AACTTTTTCCCCTATTTAAT

In100 candidate248 (in intron):

LOCUS ENSG00000134138

DESCRIPTION Homeobox protein Meis2 (Meis1-related protein 1).

[Source:Uniprt/SWISSPROT;Acc:O14770]

ATTATAACATCTTTCACACTGCGTTGTAATTATTTGATTCCTAGTCTCTCTCTCTCCCTGCTTTTCCAAGGTGCAGAT  
TATCACTTCTTCGATTATCT

In100 candidate249 (in intron):

LOCUS ENSG00000134138

DESCRIPTION Homeobox protein Meis2 (Meis1-related protein 1).

[Source:Uniprt/SWISSPROT;Acc:O14770]

ATTAGTCTCTTTAACATTATTTCAAACCTGGTTTGTTCCTTTTGTGCAGTGTGACCTGTTCTTGTATTACAATAATCCCC  
GATGTACCCTTTTTTCTTTC

In100 candidate250 (in intron):

LOCUS ENSG00000166068

DESCRIPTION Sprouty-related, EVH1 domain-containing protein 1 (Spred-1).

[Surce:Uniprot/SWISSPROT;Acc:Q7Z699]

AGTTTAACAACCACAAGAATCTCTTCTTTCTGTTGATTTTATCACCACATCTATTTCCGTTTTTGCCAGGCAACCACTAT  
TTTGTTCCTCTCAATTATTTTC

In100 candidate251 (in intron):

LOCUS ENSG00000166068

DESCRIPTION Sprouty-related, EVH1 domain-containing protein 1 (Spred-1).

[Surce:Uniprot/SWISSPROT;Acc:Q7Z699]

AGAAGTTAGACAAGATTCTAACTTAGGTCTTTTCTCACCCATTTTTGTTTTGTTTTGTTTTTTTTCTCCCAGTATTCTAT  
TCAGTTTGCTTATGATTTTT

In100 candidate252 (in intron):

LOCUS ENSG00000206194

DESCRIPTION ATP-binding cassette, sub-family A (ABC1), member 11 (pseudogen)  
(ABCA11) on chromosome 4 [Source:RefSeq\_dna;Acc:NR\_002451]

TTATGATTTGTAAAGTATATGCATATGAATCTAGTAACTGGGATAATTTGTTATTTTTGTTTCTTTCAGCTATGTGTTCT  
CATTTCACCCAAGACTTTTT

In100 candidate253 (in intron):

LOCUS ENSG00000172575

DESCRIPTION RAS guanyl releasing protein 1  
[Source:RefSeq\_peptide;Acc:NP\_00730]

GGAACATCATGCTTATTACTCTTGACACTCATAGAACACTTATTTAACATTTATGTAGCTTTCTTTTCATTATCTCAGTC  
TGATTCCTCAGCTATATTTT

In100 candidate254 (in intron):

LOCUS ENSG00000100485

DESCRIPTION Son of sevenless homolog 2 (SOS-2).  
[Source:Uniprot/SWISSPROT;Ac:Q07890]

ACCTTTCTTCACTCTAGTAGAATAATTAAGTAGAGTGAAGAAAGTTTTTCATTTCTCTCATTTTTTCTTTGCAGCC  
AATTGTCTTTATATTATTTT

In100 candidate255 (in intron):

LOCUS ENSG00000100485

DESCRIPTION Son of sevenless homolog 2 (SOS-2).

[Source:Uniprot/SWISSPROT;Ac:Q07890]

AACATTGCTCTAAATTTCTATCTTGTTATCTTATAAAGGAAATAACTTTTGAAGTTAATATTTTTTTCTGTGCAGTGTTG  
TATTCTTCCTCTCTTAGCTG

In100 candidate256 (in intron):

LOCUS ENSG00000155189

DESCRIPTION 1-acyl-sn-glycerol-3-phosphate acyltransferase epsilon (EC  
2.3..51) (1-AGP acyltransferase 5) (1-AGPAT 5) (Lysophosphatidic acid  
acyltransferase epsilon) (LPAAT-epsilon) (1-acylglycerol-3-phosphate  
Oacyltransferase

5). [Source:Uniprot/SWISSPROT;Acc:Q9NUQ2]

CTAGTGTGTTGCTTTTAACCTGTAGCTTGAAAAAAGCTGCTTTCATTGTTTTTTTTTGTTTTCTGTCACTGGCTCAGCC  
CTGCTTTCAATTGTTTATAT

In100 candidate257 (in intron):

LOCUS ENSG00000150667

DESCRIPTION fibrous sheath interacting protein 1

[Source:RefSeq\_peptide;AccNP\_689810]

ACTGATTGGTAAGAGCTCTATAAATATGTGAATATATTAACCTTTTGTATATCATCTTTGTTGCATTTATTTCCCCAGTT  
TCTCAGGTTCTTTTAATTT

In100 candidate258 (in intron):

LOCUS ENSG00000166073

DESCRIPTION Probable G-protein coupled receptor 176 (HB-954).

[Source:Uniprt/SWISSPROT;Acc:Q14439]

TTGTTGTGTTGTTAGGAATTTTTTATATATTCTGGATATACATATAACATATATACATACATGTTACTTTTTCCTCAGAT  
ATACCTTTTTTCAGTGTTC

In100 candidate259 (in intron):

LOCUS ENSG00000012983

DESCRIPTION Mitogen-activated protein kinase kinase kinase kinase 5 (EC  
2.711.1) (MAPK/ERK kinase kinase kinase 5) (MEK kinase kinase 5) (MEKKK 5)  
(Kiase homologous to SPS1/STE20) (KHS). [Source:Uniprot/SWISSPROT;Acc:Q9Y4K4]

EXON

TCTCTATCCCCATTTCTTGTACTTAGGCCTTTTCTCCTAGATAATTATAACAATTTTGAAGTGAATTTCTTCCAGTT  
TTTCCTTTTTTTCCTTCCAA

In100 candidate260 (in intron):

LOCUS ENSG00000198513

DESCRIPTION Atlastin (GTP-binding protein 3) (Guanine nucleotide-binding  
prtein 3) (GBP-3) (Brain-specific GTP-binding protein).

[Source:Uniprot/SWISSROT;Acc:Q8WXF7]

TGGGAGCCACTGCACCCGGCCCCAATTTTCCATATATTTGAAATAACAATTTAAGAAATTGTCCCTGTGTTTCAGAAGAC  
TTCTCTCGTGATCTGTTTTTC

In100 candidate261 (in intron):

LOCUS ENSG00000156970

DESCRIPTION Mitotic checkpoint serine/threonine-protein kinase BUB1 beta (E

2.7.11.1) (hBUBR1) (MAD3/BUB1-related protein kinase) (Mitotic checkpoint inase  
MAD3L) (SSK1). [Source:Uniprot/SWISSPROT;Acc:O60566]  
GAACCTCTAAAAATTTAACTTTTTTTCTCCTATATTCTCTCTTTGTCTTTTTTACTTTACTTTCTGAGTATATTATCAGCT  
TAATATTTTTTGGTCTTTTTTA

In100 candidate262 (in intron):

LOCUS ENSG00000100503

DESCRIPTION Ninein (hNinein) (Glycogen synthase kinase 3 beta-interacting  
potein) (GSK3B-interacting protein). [Source:Uniprot/SWISSPROT;Acc:Q8N4C6]

AACATACACACATGTTTGCATGATTCCGGAGGCTTGATGATCTAACAAGGAAAATTCCTTTTTTCTGTCAGTTTAATTTT  
ACCTTGAGTCTTCTCTCGTG

In100 candidate263 (in exon):

LOCUS ENSG00000177306

DESCRIPTION similar to olfactory receptor 873 (PJCG6), mRNA  
[Source:RefSeq\_na;Acc:NM\_001040066]

TGTCATCAATAACATATTCATATATTTTCGATAGTACTATGTTTGGTTTTCTTCCCATTTCAGGGATCTTTTTGTCTTACT  
ATAAAATTGTCCCCTCCATT

In100 candidate264 (in intron):

LOCUS ENSG00000100505



DESCRIPTION Tripartite motif-containing protein 9 (RING finger protein 91). [Source:Uniprot/SWISSPROT;Acc:Q9C026]

GAGAAAAGCAAAC TAACCAAAGTAAGATCATAATTTTATATTTTGTTTTAACTCAGCCATTAGTCCTTTTTTATAGT  
AAGTTGCTTTTTTAATTCTT

In100 candidate265 (in exon):

LOCUS ENSG00000197293

DESCRIPTION

CGTCATCAATAACATATTCATATATTTTCGATAGTACTATGTTTGGTTTTCTTCCCATTTCAGGGATCTTTTTGTCTTACT  
ATAAAATTGTCCCCTCCATT

In100 candidate266 (in exon):

LOCUS ENSG00000206014

DESCRIPTION

TGTCATCAATAACATATTCATATATTTTCGATAGTACTATGTTTGGTTTTCTTCCCATTTCAGGGATCTTTTTGTCTTACT  
ATAAAATTGTCCCCTCCATT

In100 candidate267 (in intron):

LOCUS ENSG00000139926

DESCRIPTION FERM domain-containing protein 6 (Willin).

[Source:Uniprot/SWISPROT;Acc:Q96NE9]

AGTTCACCTGTTTCATGCCTCCCTTGTGTGGTTCTTTCTTTTTAACTTTCAATATTTCCGTGATTTTTTTTTTCTTCAGGA  
ACTTGGTTCCTATTTTTCC

In100 candidate268 (in exon):

LOCUS ENSG00000197116

DESCRIPTION G protein-coupled receptor homolog clone G3 (Fragment).

[SourceUniprot/SPTREMBL;Acc:Q9UDD8]

AGCGTCATCAATAACATATTCATATATTTTCGATAGTACTATGTTTGGTTTTCTTCCCATTTCAGGGATCTTTTTGTCTTA  
CTATAAAATTTTCCCCTCCA

In100 candidate269 (in intron):

LOCUS ENSG00000180998

DESCRIPTION Protein GPR137C (Fragment). [Source:Uniprot/SPTREMBL;Acc:Q8N3F9  
TTGCTTCTTTTCTAACTCCTCTCTTCCTTTCTTCCTTTTTTACTGTCTTCTTTTGTGGTTAAGTGATTTCTCTGGCAGTA  
TGTTTTAATCTATTGCTTTT

In100 candidate270 (in intron):

LOCUS ENSG00000180998

DESCRIPTION Protein GPR137C (Fragment). [Source:Uniprot/SPTREMBL;Acc:Q8N3F9  
TTTCAAGCTCACTGATTGTTCTGTTTAACCAATTCTGCTGTTGCTCCCTATTACATCTTTCATTTTCATTCAGTGTATTTT  
CAGCTCCTGAGTTTCTGTTT

In100 candidate271 (in intron):

LOCUS ENSG00000163950

DESCRIPTION Histone RNA hairpin-binding protein (Histone stem-loop-binding  
rotein). [Source:Uniprot/SWISSPROT;Acc:Q14493]

GCAAAC TAAGCTACTTCGTCTTCGTTGACTCATTACCTAATGCATCCTTAACCATGTTTAATCTCCCTTGATTATCAGTG  
TGTGATCCTTTCTCTTTTG

In100 candidate272 (in intron):

LOCUS ENSG00000147324

DESCRIPTION malignant fibrous histiocyto ma amplified sequence 1

[Source:Refeq\_peptide;Acc:NP\_004216]

TCAAGGTGATTTTTCACCTTTGTTTATTTAACCTTGTGTTCTTTTTGTTTATCCAACCATTTGTGCTCTTGTTCCCAGTT  
TTTTTTGTGAGTGATTCTCT

In100 candidate273 (in intron):

LOCUS ENSG00000147324

DESCRIPTION malignant fibrous histiocyto ma amplified sequence 1

[Source:Refeq\_peptide;Acc:NP\_004216]

GGTAGTAACTCCTAGTCTCCTTCCTCTCCATCCTCTGTACCTTGTGTCTCTTTTCCCATTTCTGATTTTGTATCCAGGA  
GTTTCTGATTTTTCCTTTT

In100 candidate274 (in intron):

LOCUS ENSG00000173273

DESCRIPTION Tankyrase-1 (EC 2.4.2.30) (TANK1) (Tankyrase I) (TNKS-1) (TRF1-  
interacting ankyrin-related ADP-ribose polymerase).

[Source:Uniprot/SWISSPRT;Acc:O95271]

AAAAATCACATTTTCTGTCATTATCCTTTGCTACTTGAGCATCCACTAACATGACCTTTGGATATCCTGTCCTTTTCAGTT  
TTTTGACATCTTCCAGTTTC

In100 candidate275 (in intron):

LOCUS ENSG00000173273

DESCRIPTION Tankyrase-1 (EC 2.4.2.30) (TANK1) (Tankyrase I) (TNKS-1) (TRF1-interacting ankyrin-related ADP-ribose polymerase).

[Source:Uniprot/SWISSPRT;Acc:O95271]

AGTTGTTGAGTAGTGAAGTTTCTAACTATAATTGTAGATTTAATTATTTCTCCTTTAACTTCTATCAGTTTTTGTTTCAT  
ATATTTTGTAGCTTTGTTGT

In100 candidate276 (in intron):

LOCUS ENSG00000173273

DESCRIPTION Tankyrase-1 (EC 2.4.2.30) (TANK1) (Tankyrase I) (TNKS-1) (TRF1-interacting ankyrin-related ADP-ribose polymerase).

[Source:Uniprot/SWISSPRT;Acc:O95271]

AGATTTCACTTTATAATCATAACCATAAATCTCAAGTGTGTTTTATCCTTGCCTCAGCCATTTCTTTTTACACATTTAA  
TTTTTTCCTCTCAGCTTATT

In100 candidate277 (in intron):

LOCUS ENSG00000173273

DESCRIPTION Tankyrase-1 (EC 2.4.2.30) (TANK1) (Tankyrase I) (TNKS-1) (TRF1-interacting ankyrin-related ADP-ribose polymerase).

[Source:Uniprot/SWISSPRT;Acc:O95271]

AAACGAATAATGCCTTACCTGCAATATATTAAATATAACTTTTTATTACCTTTTTAAATTTCGACCTTCAGTGATCTGT  
AGTTATTATTCTTCATTTTC

In100 candidate278 (in intron):

LOCUS ENSG00000103148

DESCRIPTION UPF0171 protein C16orf35 (Alpha globin regulatory elementcontaning gene protein) (Protein CGTHBA) (-14 gene protein).

[Source:Uniprot/SWISPROT;Acc:Q12980]

AGTTTCCATCATAGGGGTAAGTACTGTTCCCATTTTTCTGTGTCTTTCCAGGACCTTCTGTGTCAATACAGGCGTATGTA  
TTTCTTTTTTCTTTTTTTTTT

In100 candidate279 (in intron):

LOCUS ENSG00000187446

DESCRIPTION Calcium-binding protein p22 (Calcium-binding protein CHP)  
(Calcneurin homologous protein) (Calcineurin B homolog).

[Source:Uniprot/SWISSPRT;Acc:Q99653]

AGTAACTTAACATTGATACAATCCTCTTATCTAATCTATTACTCTGTTTTATTAACATATTATCCAGTTTATTCTAATT  
TATATTCATATTCCAATTTT

In100 candidate280 (in intron):

LOCUS ENSG00000175806

DESCRIPTION Peptide methionine sulfoxide reductase (EC 1.8.4.11)  
(Proteinethionine-

S-oxide reductase) (PMSR) (Peptide-methionine (S)-S-oxide reductae)  
(Peptide Met(O) reductase). [Source:Uniprot/SWISSPROT;Acc:Q9UJ68]

GAAACAAAAGAATTTAACTGATATTTTTATTAATTGTTCTTTTCAGTCACACTTTCCTTCTATCACATTATCATACGTGT  
TCATAGTATCTTTGCTGTTT

In100 candidate281 (in intron):

LOCUS ENSG00000109685

DESCRIPTION Probable histone-lysine N-methyltransferase NSD2 (EC 2.1.1.43)  
Nuclear SET domain-containing protein 2) (Wolf-Hirschhorn syndrome candidat 1  
protein) (Multiple myeloma SET domain-containing protein) (Protein trithrax-5).  
[Source:Uniprot/SWISSPROT;Acc:O96028]

AGAGATCTGACCTTTTAACCTGCTTACCTGTATTCACCTTCTCATTTGACTTCAGTGAATCTGGTACCTCCTTTCTTTT  
ATTTTGGGCCCCGTCTCTTTC

In100 candidate282 (in exon):

LOCUS ENSG00000109685

DESCRIPTION Probable histone-lysine N-methyltransferase NSD2 (EC 2.1.1.43)  
Nuclear SET domain-containing protein 2) (Wolf-Hirschhorn syndrome candidat 1  
protein) (Multiple myeloma SET domain-containing protein) (Protein trithrax-5).  
[Source:Uniprot/SWISSPROT;Acc:O96028]

CTTCTGAACTCGCTAGGTTCTTATCAACATTTGGGGGATAACTTTGTATATTTTTTTTCATTTGGCTTTTCTTTACCAGTT  
TCTGATTTTTTATTCTCAATA

In100 candidate283 (in intron):

LOCUS ENSG00000020577

DESCRIPTION Sterile alpha motif domain-containing protein 4A.  
[Source:Uniprt/SWISSPROT;Acc:Q9UPU9]

TGATGAGGTTATATATGCCGTGTTTTTAACTTTCATCTGCTTAGTGAATTCCTTTTGTCTTTTGATCTCTCTCAGCAACC  
TAGTTTTTGTTTTAAATTTT

In100 candidate284 (in intron):

LOCUS ENSG00000131979

DESCRIPTION GTP cyclohydrolase I (EC 3.5.4.16) (GTP-CH-I).

[Source:Uniprot/WISSPROT;Acc:P30793]

AAGTGAGAATTCTGACTTTCCTTTTGATCTAGAAGTTAAGTAACTCTGTAGACCTTTTATATTACTTTCACCCCAGAAGAA  
AATTCATTTTTCCCCTTTT

In100 candidate285 (in intron):

LOCUS ENSG00000146555

DESCRIPTION Protein sidekick-1 precursor.

[Source:Uniprot/SWISSPROT;Acc:Q7ZN4]

GGGTGATAGAGTGAGACCCTGTCTCTAAAAATACAAAGGTATTAAAGTTAACACTTGAAATGCCTTTCATTCTGTCAGTG  
GCTCTTTTTTTGTTTGTTTT

In100 candidate286 (in intron):

LOCUS ENSG00000146555

DESCRIPTION Protein sidekick-1 precursor.

[Source:Uniprot/SWISSPROT;Acc:Q7ZN4]

AGTTTTATAGTATTTTAATTGCTTTACTTCCAAAAGGTGTTTAAATAACTGATAAAACAACCTCTTTCAACTTTTCAGAA  
TTTTGTTATTACTTGTCATC

In100 candidate287 (in intron):

LOCUS ENSG00000146555

DESCRIPTION Protein sidekick-1 precursor.

[Source:Uniprot/SWISSPROT;Acc:Q7ZN4]

AAGTAACTATTCTTTTTGCGTACATTTTGGTTTTCTTACAGTTGAATTTTGAAAATTCTTTTTCTGCATAGTAGGTTT  
TTGTTCTTTTTTTTTGTTTT

In100 candidate288 (in intron):

LOCUS ENSG00000146555

DESCRIPTION Protein sidekick-1 precursor.

[Source:Uniprot/SWISSPROT;Acc:Q7ZN4]

TCTGCCACATAGATAACCATATTTATTAGACTTTTGGTTTTTCCTTTTTCTTTTCTTTCTGGCAACATAAACAGCTCTG  
CGTATATGTGTACTTCCTCT

In100 candidate289 (in intron):

LOCUS ENSG00000104643

DESCRIPTION Myotubularin-related protein 9.

[Source:Uniprot/SWISSPROT;Acc:Q6QG7]

AAGCATAGATGATATGGAAATTTACAAGAGAATAACCGTATGTCTTGTACATTTTTTTTTGTTTTTTTACTGACAGTTTGG  
TTGCTGTGTGTCTTTCACTT

In100 candidate290 (in intron):

LOCUS ENSG00000167930

DESCRIPTION Protein ITFG3. [Source:Uniprot/SWISSPROT;Acc:Q9H0X4]



AGGGGAATAATCCGTTTGAATAACCATATATGAGGTATTGTGTTTATCTTTCTTTCTTCAAGTTATTCTTGGTGTCAGCT  
CCTTTTTTTTTTTTTTTTTTCT

In100 candidate291 (in intron):

LOCUS ENSG00000128298

DESCRIPTION Brain-specific angiogenesis inhibitor 1-associated protein 2-like  
protein 2 (BAI1-associated protein 2-like protein 2).

[Source:Uniprot/SWISPROT;Acc:Q6UXY1]

ACTTGAGCTAACTGTATTTACTTTGTCATTTCTCTTTTTCTCCACACTATTTCTTGTCAGTTTGGTTGAGTTATTATA  
CTATACATTCCCCTTTTCCC

In100 candidate292 (in intron):

LOCUS ENSG00000136573

DESCRIPTION Tyrosine-protein kinase BLK (EC 2.7.10.2) (B lymphocyte  
kinase)(p55- BLK). [Source:Uniprot/SWISSPROT;Acc:P51451]

GATTATATCATACAAAACATTCTGCAATTTACTCTTTTCATGTAACAATAATGTATCCTGGGTATTTTCTTTGCCAGTT  
CAGATCTCTTTTATCCTTTT

In100 candidate293 (in intron):

LOCUS ENSG00000126777

DESCRIPTION Kinectin (Kinesin receptor) (CG-1 antigen).

[Source:Uniprot/SWISPROT;Acc:Q86UP2]

CCTTTTTATTTCTTTATGTCCCTTCCCACACTCTAACCACTACCTTTCTTACCTTTGCTTTTCTTTTAGTTTTGCCAGAT  
CTAGTTGTATCCCTATTTTG

In100 candidate294 (in intron):

LOCUS ENSG00000126777

DESCRIPTION Kinectin (Kinesin receptor) (CG-1 antigen).

[Source:Uniprot/SWISPROT;Acc:Q86UP2]

AGAGCTAAATTAACCTTTGTCTCAACCTCTTTACTTTTATTTTTCAGTTTGCCTCCCTGCTTTTAAACTTTGTCTTTGT  
TCTTCCCTGAATTTTCCTGT

In100 candidate295 (in exon):

LOCUS ENSG00000157954

DESCRIPTION WD repeat domain phosphoinositide-interacting protein 2 (WIPI-2  
(WIPI49-like protein 2). [Source:Uniprot/SWISSPROT;Acc:Q9Y4P8]

AACTCCATAACGCTGAGGAAATACATCATTTTCACTTCAGTGGCTTTTAAATCCTGCTTATGAATTTTAGCTTTTTGTTT  
GTTTGTTTTCTCTTTTTTGCC

In100 candidate296 (in intron):

LOCUS ENSG00000125386

DESCRIPTION Uncharacterized protein C4orf8 (Protein IT14).

[Source:Uniprot/WISSPROT;Acc:P78312]

TGATGAGTTTGAGTAAAATAAAGAAATACCTGTTAACATATTTGTAGTATTGTATCTTTATTCTGTTTGCAGATGATGTT  
TCTCTCATATATATCATTTT

In100 candidate297 (in intron):

LOCUS ENSG00000100206

DESCRIPTION Meiotic recombination protein DMC1/LIM15 homolog.

[Source:Uniprt/SWISSPROT;Acc:Q14565]

AGTTATTTAGATTTAACTATAAAGATTTTTGTTTTCTTTGTTTCATTATGGTTTCTTGCATCCCAGATGTTATTTTTTCCT  
GTATTTTTGTTTTGCTGTAA

In100 candidate298 (in intron):

LOCUS ENSG00000103978

DESCRIPTION Transmembrane protein 87A precursor.

[Source:Uniprot/SWISSPROT;cc:Q8NBN3]

TGAGCCACCGTGCCCGCCTGAGACACTTTAACATTATCTTTTTCTTTGTTATTTCTGTGCTTCTCATATTTACCAGTT  
GTCTTTGATTTTGTACTTTT

In100 candidate299 (in intron):

LOCUS ENSG00000090565

DESCRIPTION Rab11 family-interacting protein 3 (Rab11-FIP3) (EF handscontaning  
Rab-interacting protein) (Eferin).

[Source:Uniprot/SWISSPROT;Acc:O7515]

AGAAAATGACCAATAATCCCACTATCCTGAGAAAAATAACATTCCCATTTATTTTACTACATTTCTTTTCAGACTTTTTTTT  
TTTTTTTTTGAAATAGAGTCT

In100 candidate300 (in intron):

LOCUS ENSG00000092529

DESCRIPTION Neutral alpha-glucosidase C (EC 3.2.1.20).

[Source:Uniprot/SWISPROT;Acc:Q8TET4]

TTCCTCATCTTGTCCCGAATAACCGAATTTCTTCATTTCTTATTTATCCTTCCAGTATTTTTTTGTAAATACATGTATTT  
TTATATTATTGCTTTTCTCT

In100 candidate301 (in intron):

LOCUS ENSG00000092529

DESCRIPTION Neutral alpha-glucosidase C (EC 3.2.1.20).

[Source:Uniprot/SWISPROT;Acc:Q8TET4]

AGTCATCATTAATAACCCCTTCTTAATCTCTTGCCTTTCTGTTTTAAACTTATCACAGAATGCTCTGTGTTAGCTTTGCA  
TCTCTTTTATCTCCTCCAAT

In100 candidate302 (in intron):

LOCUS ENSG00000139971

DESCRIPTION Uncharacterized protein C14orf37 precursor.

[Source:Uniprot/SWISPROT;Acc:Q86TY3]

AGGTAGTTTAAATGGTTCCTGATAGTTTTCCTAATAACCTAAATTTCCATCATGTTTCCTCTATCCAGCCTCTTTTTCAA  
CTTCTCTTTAATTAGAGTCC

In100 candidate303 (in intron):

LOCUS ENSG00000139971

DESCRIPTION Uncharacterized protein C14orf37 precursor.

[Source:Uniprot/SWISPROT;Acc:Q86TY3]

TTTCCTGGGAACCCTAACTCACGCTGAGCCCTTCCTTTTGAAATTCTTCCAGTCATTTGTCAGTATTATTTAATTTCTAT  
TCACTGCACTATCTCATTTT

In100 candidate304 (in intron):

LOCUS ENSG00000011275

DESCRIPTION E3 ubiquitin-protein ligase TRIAD3 (EC 6.3.2.-) (Ubiquitinconjugating enzyme 7-interacting protein 1) (Zinc finger protein inhibiting NFappa-B) (Triad domain-containing protein 3).

[Source:Uniprot/SWISSPROT;Acc:9NWF9]

CAAATGTGTGTGTGGTTGTGTAACCAACCATCTTTTCCCAATGTCACCTGTATTTATTTATCTTTTCTCACCTGCCAGCT  
TTCTTCCCTGCTTGTTTTTC

In100 candidate305 (in intron):

LOCUS ENSG00000032219

DESCRIPTION AT-rich interactive domain-containing protein 4A (ARID domainontaining protein 4A) (Retinoblastoma-binding protein 1) (RBBP-1).

[Source:niprot/SWISSPROT;Acc:P29374]

GGATAGTTTTCTGTCACTTGTAGTAAAAGTTATTGAGTAACAATGCTCCTTGCTTGTATTTTGTTCCTTACTCCAGGT  
ATCTTCCTTGTGGTGTTTTTC

In100 candidate306 (in intron):

LOCUS ENSG00000205880

DESCRIPTION

TTTACTAATTATCCTGTTACCTATATCTAATATATCATTAATAACTTGCATTTATTTTTAAATTTTTTTTTTAATTCAGAC  
CTGCCTTTGTGTTTTGTTTT

In100 candidate307 (in intron):

LOCUS ENSG00000205877

DESCRIPTION

TTTACTAATTATCCTGTTACCTATATCTAATATATCATTAATAACTTGCATTTATTTTTTAAATTTTTTTTTTAATTCAGAC  
CTGCCTTTGTGTTTTGTTTT

In100 candidate308 (in intron):

LOCUS ENSG00000197386

DESCRIPTION Huntingtin (Huntington disease protein) (HD protein).

[Source:Uiprot/SWISSPROT;Acc:P42858]

GGAAATGGGATGAAAAATTATGGGATGAAAAATTGCCTATGGATAGTTTAACTTGAAAGAATCTGCCTTTGTTTACAGAT  
AGTTATCTTTTTTCTTTTTT

In100 candidate309 (in intron):

LOCUS ENSG00000197386

DESCRIPTION Huntingtin (Huntington disease protein) (HD protein).

[Source:Uiprot/SWISSPROT;Acc:P42858]

ACATTTGGCATAAGAATAACTGGATAATTAAGCATCTTATTCTCTGGCCTGTGTCTTTACAGTTAAAGGTAGATTTACTC  
ACCTCTCCTTTTTTGTTTTT

In100 candidate310 (in intron):

LOCUS ENSG00000164741

DESCRIPTION Rho GTPase-activating protein 7 (Rho-type GTPase-activating  
proein 7) (Deleted in liver cancer 1 protein) (Dlc-1) (HP protein) (StAR-relatd

lipid transfer protein 12) (StARD12) (START domain-containing protein 12)

[Source:Uniprot/SWISSPROT;Acc:Q96QB1]

TCTTGAGTCTTTCCTAACTCTGGGAAAACCTTTCACTGTGCTCAAATTTTCATCTTTTTCTCTCTTCTTTTTATTTTCAGTT  
TATCTCCTTCACTTATTTCA

In100 candidate311 (in intron):

LOCUS ENSG00000164741

DESCRIPTION Rho GTPase-activating protein 7 (Rho-type GTPase-activating  
proein 7) (Deleted in liver cancer 1 protein) (Dlc-1) (HP protein) (StAR-relatd  
lipid transfer protein 12) (StARD12) (START domain-containing protein 12)

[Source:Uniprot/SWISSPROT;Acc:Q96QB1]

GTAAAATTCTGTGATTTATAAACATTTTGCTTTTAGATTTAGAATTTTAACCAAGAAATAAATGTTGATTCTTTTCAGCC  
TTCCCATTTGTCTAGATTTTT

In100 candidate312 (in intron):

LOCUS ENSG00000151838

DESCRIPTION Putative uncharacterized protein ENST00000281581.

[Source:Uniprt/SWISSPROT;Acc:P0C221]

GTTAACATGGCATATGTCTTTTGTTTTAGATCTTCTTTGTTCCCTTTGCCTTAGCTGTTTCAGTTGCACTATGATGTGTCC  
AAATTTTCTTTTCATTTTTC

In100 candidate313 (in intron):

LOCUS ENSG00000128881

DESCRIPTION Tau-tubulin kinase 2 (EC 2.7.11.1).

[Source:Uniprot/SWISSPROT;Ac:Q6IQ55]

ATTTAACCCAATCTACTTCTAATTTTTTTATCCAGTGCCTCTCTCCCTCTTCCCTCTCATATTCCTTTCCCTCTGCTTTT

TACATTTATTATTATTATTT

In100 candidate314 (in intron):

LOCUS ENSG00000185053

DESCRIPTION Zeta-sarcoglycan (Zeta-SG) (ZSG1).

[Source:Uniprot/SWISSPROT;Ac:Q96LD1]

GAGTATTTTATCCTATGCTTATTTGCCATCTGTGTCTTCTTTGGTAACATCTTTTCATGTTTTTTGCCTATTTCTCAGTT

AGGTTGTTTGTTTTCTTGTT

In100 candidate315 (in intron):

LOCUS ENSG00000185053

DESCRIPTION Zeta-sarcoglycan (Zeta-SG) (ZSG1).

[Source:Uniprot/SWISSPROT;Ac:Q96LD1]

CTTAATATTGAGTCTTCCTATTCATGAACATGGATTAACTCTCTATTTATTTAGATATTCTTTGATTTCTTTCATCAGTA

TTTTGCGGTTTTCTCATAT

In100 candidate316 (in intron):

LOCUS ENSG00000185053

DESCRIPTION Zeta-sarcoglycan (Zeta-SG) (ZSG1).

[Source:Uniprot/SWISSPROT;Ac:Q96LD1]

ATGTAAACTGTCCTTTGTAACTCTTCAATGTGTCTTTTTTTAATTCTTTTTTATTTCTTTGCTACACCCAGGTGCT

GTGATCTCTCACTTGGTTTC



In100 candidate317 (in intron):

LOCUS ENSG00000185053

DESCRIPTION Zeta-sarcoglycan (Zeta-SG) (ZSG1).

[Source:Uniprot/SWISSPROT;Ac:Q96LD1]

ATTTATAACATAGCTGGAAGTTAATCCAATTATTTTTCTTCTTGCCCTACTACTGTATTCTTTCCCCCGTATCACAGCT  
CATTCACCTTTATTACTAGTT

In100 candidate318 (in intron):

LOCUS ENSG00000185053

DESCRIPTION Zeta-sarcoglycan (Zeta-SG) (ZSG1).

[Source:Uniprot/SWISSPROT;Ac:Q96LD1]

GTTTTAACATTTCTTTTTTCATCTCTGATTTTATTTGAGTTTCTTTTATTTTTGTTGTCTATCTTAAGGTTTGTCAGTT  
TTGTTTATCTTTTACAAACC

In100 candidate319 (in intron):

LOCUS ENSG00000185053

DESCRIPTION Zeta-sarcoglycan (Zeta-SG) (ZSG1).

[Source:Uniprot/SWISSPROT;Ac:Q96LD1]

CTACTAACCTTCCCCCTTTCCTGCTTCTTGCTAACTATTTTTGGAATTTTTCAGTCCTCCTTTAATAATGCTTTAATAA  
GCTTTGTTTTCTATCACCTC

In100 candidate320 (in intron):

LOCUS ENSG00000185053

DESCRIPTION Zeta-sarcoglycan (Zeta-SG) (ZSG1).

[Source:Uniprot/SWISSPROT;Ac:Q96LD1]

ACATAGTTTAAATAACTTTATTGATGTATTTTATTTACCTTTATCCATTCATTTATTTCTATTTCTCTATGCAGAATGC

TGTATTAACTTTCTCCCCTT

In100 candidate321 (in intron):

LOCUS ENSG00000185053

DESCRIPTION Zeta-sarcoglycan (Zeta-SG) (ZSG1).

[Source:Uniprot/SWISSPROT;Ac:Q96LD1]

AAGGTATTTTGAAAATTGTTTGCAAGATTTTTCATAACCATTGGTGTCTTTCTCTTTATTATCAGTGTTATGGAAGCCAT

CCTCTATTATCTTTTTTCTC

In100 candidate322 (in intron):

LOCUS ENSG00000185053

DESCRIPTION Zeta-sarcoglycan (Zeta-SG) (ZSG1).

[Source:Uniprot/SWISSPROT;Ac:Q96LD1]

TTTAATGCTCAATAAATTTGGAAGAATGAATTCTGAATGAACTAACACCTAGGGAAGCCTTGCTGTTATTGTCAGAATCA

TTTACTTGTCTTTGATATTC

In100 candidate323 (in intron):

LOCUS ENSG00000185053

DESCRIPTION Zeta-sarcoglycan (Zeta-SG) (ZSG1).

[Source:Uniprot/SWISSPROT;Ac:Q96LD1]

AGACCCTCATCATTACTCTAGCTCTTGGCCCTTCCTCTATCTTCAAAGTTAACAACATTAGCCAACTGTCTGTCTCAGAC  
TATTCTTGTGCCTCTCTCTT

In100 candidate324 (in intron):

LOCUS ENSG00000131951

DESCRIPTION Leucine-rich repeat-containing protein 9.

[Source:Uniprot/SPTREBL;Acc:Q6ZRR7]

AGAGTTTGGAAATACATTAACCGCCTCAACCTGTATTACTCTTGCTTCCAGCAACCTGACTTCACTATTCCTTTTCCAT  
TCCATTTTTACTGTAGCTTT

In100 candidate325 (in intron):

LOCUS ENSG00000104723

DESCRIPTION Tumor suppressor candidate 3 (Protein N33).

[Source:Uniprot/SWISPROT;Acc:Q13454]

TAGCTTTGAGGGTGTTCTTTGAATTAAGTCAACAAATATCTGAGTAGCTGTTTTATTCTTACTCTTTTCAGGATTATTG  
TCTAGTGTCACTTTTGTCTT

In100 candidate326 (in intron):

LOCUS ENSG00000104723

DESCRIPTION Tumor suppressor candidate 3 (Protein N33).

[Source:Uniprot/SWISPROT;Acc:Q13454]

TTACGTACTTATCTCAATATAATCTACATTAAAATATTCTGTTTATAGTTAACCATCTTTGGAGTCTTCCATGTCAGCC  
TACTGTAATTTCAACTTTTT

In100 candidate327 (in intron):

LOCUS ENSG00000104723

DESCRIPTION Tumor suppressor candidate 3 (Protein N33).

[Source:Uniprot/SWISPROT;Acc:Q13454]

TTTTAATGTTATATTTACATGTGCTAATTTAGAATGGAATAACAAACATATTGTATTTTCCTTATGTTCTATGTTTCAGCA  
CATAATAATTTTCTTTCTTT

In100 candidate328 (in exon):

LOCUS ENSG00000136240

DESCRIPTION ER lumen protein retaining receptor 2 (KDEL receptor 2) (KDEL  
edoplasmic reticulum protein retention receptor 2) (ERD2-like protein 1) (EL-1).

[Source:Uniprot/SWISSPROT;Acc:P33947]

AGCACCACCTAACCATTCCCTTACATTCTTTTTTGTATGTGTGGTTTTCTTTTTATTTAACCCGCAGCCGACATCGTAGTTT  
CTTGTTTTGTTTTGTTTTAC

In100 candidate329 (in intron):

LOCUS ENSG00000137842

DESCRIPTION Transmembrane protein 62.

[Source:Uniprot/SWISSPROT;Acc:Q0P6H9]EXON

CATTCTATTTAACCGACTTGTCTCTTTCATCTCTTTTACTGTACAGATTGCATCCCTTACCTCCCCCTCTTTTTTGTAC  
CCTTAAAATTTATTTGTTTT

In100 candidate330 (in intron):

LOCUS ENSG00000137842

DESCRIPTION Transmembrane protein 62.

[Source:Uniprot/SWISSPROT;Acc:Q0P6H9]EXON

AGCCACTTTGCTTTATATAACCACTTCGAATGTATATACATTTTCTCCTTAACCAGATAAGTTCCTCAATGCAGGAACTT  
TTTTTTTTTTTTTTTTTTTTTTT

In100 candidate331 (in intron):

LOCUS ENSG00000164631

DESCRIPTION Zinc finger protein 12 (Zinc finger protein KOX3) (Zinc finger  
rotein 325) (Gonadotropin-inducible transcription repressor 3) (GIOT-3).

[Source:Uniprot/SWISSPROT;Acc:P17014]

TTCTTGTGTTCTTCGTGTAACCTCTGGTTTTTTTTTTTAAATCTTTACCGTGCAGTGCCTGAGACTGTTTCTGGACCCTG  
TTCTACTTTGTACTTTTCTT

In100 candidate332 (in intron):

LOCUS ENSG00000163982

DESCRIPTION otopetrin 1 [Source:RefSeq\_peptide;Acc:NP\_819056]

AGAGATAACCATTTGTTGACATTTTAGTTTGTGTCCTTCCAGATTTTTTCCGTCTGTCTGTGTGTGTGTGTATCCATCTAT  
CTATCTATCATCTACATATC

In100 candidate333 (in intron):

LOCUS ENSG00000020426

DESCRIPTION CDK-activating kinase assembly factor MAT1 (RING finger  
proteinMAT1) (Menage a trois) (CDK7/cyclin H assembly factor) (p36) (p35)  
(Cyclin 1-interacting protein) (RING finger protein 66).

[Source:Uniprot/SWISSPROT;cc:P51948]

AGTACCCTGTTAACATTTTCTTTTTTGTGTATAGTTCTGATTACTTTTTTGTTTTTTACTACCTCAGCTCCTTCCCTAAT

ATTTTGTAAAGCTTCTTTT

In100 candidate334 (in intron):

LOCUS ENSG00000020426

DESCRIPTION CDK-activating kinase assembly factor MAT1 (RING finger proteinMAT1) (Menage a trois) (CDK7/cyclin H assembly factor) (p36) (p35) (Cyclin 1-interacting protein) (RING finger protein 66).

[Source:Uniprot/SWISSPROT;cc:P51948]

TGGTTTTTATTTTTCATTCTATTGATGAGTTGTATAACATTGATTTGCATTTTTTTTGTGTTGTTGTTACATATCAGAG  
CTGTTTTTTTTTCTTGTTTT

In100 candidate335 (in intron):

LOCUS ENSG00000103227

DESCRIPTION Transmembrane protein 112. [Source:Uniprot/SWISSPROT;Acc:Q96S06  
CTTGATGTGGTCTTGATTAGCTTTTGTAGTAAGTCTTGAAATTGGGTAACATGAGTCCTCCACCTCTGTTCTTTTCCAGAT  
GATTTTGGCTTTTAAATCCC

In100 candidate336 (in intron):

LOCUS ENSG00000027075

DESCRIPTION Protein kinase C eta type (EC 2.7.11.13) (nPKC-eta) (PKC-L).

[Source:Uniprot/SWISSPROT;Acc:P24723]

GCCGTATGTTTAACTACATGATTTGTCTTTATTTCCAACATCTTGCCAGATATTTCTATTTGAGTACTTTTGTGTCCAAA  
TTTAAACTCATTTCTTTCCC

In100 candidate337 (in intron):

LOCUS ENSG00000155970

DESCRIPTION EF-hand domain-containing family member A2.

[Source:Uniprot/SWISPROT;Acc:Q86XE3]

AACTTTGTTTTGCCTTCTAAGGATATAAATTATAACTTTGGCCTTCTCTGTGCATTGCTTTGTTTCTTCCAGGTTCTTTT  
TTATTTCTGTTTGATTTTAT

In100 candidate338 (in intron):

LOCUS ENSG00000155970

DESCRIPTION EF-hand domain-containing family member A2.

[Source:Uniprot/SWISPROT;Acc:Q86XE3]

TTCTATTTGCTTGCATTTAACCCATTCCGTTTCTCTGTTTGTGCCTTTTGTCTCTCCAGCCAGCATTCTCTCTTTCCATA  
TAGATTGATATTCATTCCTT

In100 candidate339 (in intron):

LOCUS ENSG00000168818

DESCRIPTION Syntaxin-18 (Cell growth-inhibiting gene 9 protein).

[Source:Unprot/SWISSPROT;Acc:Q9P2W9]

TTAACTTAGGGAGAACCAACATCTTTATATTTCTTTTTCTATCCAAGAATGATGTGTCCTTTCCTTTGTGTCTTTCAGGA  
ATCTTTTTTGGTTTTTTACG

In100 candidate340 (in intron):

LOCUS ENSG00000106415

DESCRIPTION Glucocorticoid-induced transcript 1 protein.

[Source:Uniprot/SWSSPROT;Acc:Q86VQ1]

CTATTCTAAAAGATAATGCAAATATAATGTTAACTCCATGTAATATATGTTTGCCTGTGTTTCATTCATTTGCTTTCAGTT  
TTTCTCTTTTCCTTAAATTT

In100 candidate341 (in intron):

LOCUS ENSG00000176177

DESCRIPTION ENTH domain containing 1 [Source:RefSeq\_peptide;Acc:NP\_689725]

EXON

ACTTTGGTTTGTAGTCTGTTTTATCTGATATAAGTATAACTACTCCCACTCTTTTTTGGTTTCCAGTTACATGGAGTATC  
TTTTTCTACCCCTTCACTTT

In100 candidate342 (in intron):

LOCUS ENSG00000003147

DESCRIPTION Islet cell autoantigen 1 (69 kDa islet cell autoantigen) (ICA69  
(p69) (Islet cell autoantigen p69) (ICAp69).

[Source:Uniprot/SWISSPROT;AccQ05084]

TGTTTAACCACCCATTCTCTCTTTCTCTTAGCAGTGGAACGTGTATTTCTCCCTGGCCTTGGTTTAAAGTCTTCTCAC  
TCATTCTTCGGTTTCTTTCC

In100 candidate343 (in intron):

LOCUS ENSG00000106443



DESCRIPTION PHD finger protein 14. [Source:Uniprot/SWISSPROT;Acc:O94880]

GTCTATCCTAAATTAGCATAACAAATTTATAAATTTTCTTCCCTCACATTTTCAATGTCTATTTTGCATTATTTGCAGAT  
AAGCTTAATTTTCCCTTGTT

In100 candidate344 (in exon):

LOCUS ENSG00000100354

DESCRIPTION Trinucleotide repeat-containing 6B protein.

[Source:Uniprot/SWISPROT;Acc:Q9UPQ9]

TTTTCTTTGCTGTGAAAGTAACCCTAAAATATGTTTTCTTCTTTTGTATTTTTTTGGTTTTTGTTTTAAAGCCATCAGAA  
GTTTCAGATCTTTACTCTTT

In100 candidate345 (in intron):

LOCUS ENSG00000140015

DESCRIPTION Potassium voltage-gated channel subfamily H member 5 (Voltagegated  
potassium channel subunit Kv10.2) (Ether-a-go-go potassium channel 2)  
(EAG2). [Source:Uniprot/SWISSPROT;Acc:Q8NCM2]

GTGTTCTGTCCTAGAAATATGAAATTCTGTGCTCATAAGCATGTAACATATGCACTTTTCTTACATTTTATCAGTTATC  
TTTTTTCCTGCATGTCAAAT

In100 candidate346 (in intron):

LOCUS ENSG00000005108

DESCRIPTION Thrombospondin type-1 domain-containing protein 7A precursor.

[ource:Uniprot/SWISSPROT;Acc:Q9UPZ6]

TATGTATACATGTGCCATGCTGGTGCCTGCACCCACTAACGTGTCATCTAGCATTTTTTTATTCCTCTTTGAGACAGGT  
CCACTTTATTCATTTTACTT

In100 candidate347 (in intron):

LOCUS ENSG00000168781

DESCRIPTION Histidine acid phosphatase domain containing 2A isoform 2

[Source:RefSeq\_peptide;Acc:NP\_055474]

TCTCTCTGTTCCCTTCCCTTAACTTTCTTATCTGCTTCTCTCCTTGTCTCTTTTTTGTCTCCAGTCTCCCTATCAGTCCTC  
TTTACATCTGTTAAAATTTT

In100 candidate348 (in intron):

LOCUS ENSG00000003989

DESCRIPTION Low-affinity cationic amino acid transporter 2 (CAT-2) (CAT2).

Source:Uniprot/SWISSPROT;Acc:P52569]

TTTGCCACCACTAAATAACAATGAGTATTTTTGAGTCCTGCATCCTTTAGTTCTTCCTTCAGGACCACCATTCAGTTTTA  
TTGTATTCTCTTAATGCTTT

In100 candidate349 (in intron):

LOCUS ENSG00000100357

DESCRIPTION Adenylosuccinate lyase (EC 4.3.2.2) (Adenylosuccinase) (ASL)

(AASE). [Source:Uniprot/SWISSPROT;Acc:P30566]

CTATTTGTAAATGACATTGAATCTCCGTAACGATTATTTGGTTAAACATTTTATCTCTTGTTTTATCTTTACCAGTTACT  
CCCTCTCTTACTTAAATTGT

In100 candidate350 (in intron):

LOCUS ENSG00000154001

DESCRIPTION Serine/threonine-protein phosphatase 2A 56 kDa regulatory subunit epsilon isoform (PP2A, B subunit, B' epsilon isoform) (PP2A, B subunit, B6 epsilon isoform) (PP2A, B subunit, PR61 epsilon isoform) (PP2A, B subunit R5 epsilon isoform). [Source:Uniprot/SWISSPROT;Acc:Q16537]

CTGTCTATATTGGTTAATACATTTTTCTGGTTACAATGAAGTCTTGCTAACCTGAAAGCTTTTTTTTGTCTTTTTCAGAT  
GACTTTCCATATCTTTTGTC

In100 candidate351 (in intron):

LOCUS ENSG00000006747

DESCRIPTION Adseverin (Scinderin). [Source:Uniprot/SWISSPROT;Acc:Q9Y6U3]

ATTAATAACTGTAACCATCATACTATACTTTGTCTCCAGAACTTATTTATCTTATACCTGAAAGTCTGAATTCTTTCACC  
AACATTTCTCCATTTCTCT

In100 candidate352 (in intron):

LOCUS ENSG00000196588

DESCRIPTION MKL/myocardin-like protein 1 (Myocardin-related transcription factor A) (MRTF-A) (Megakaryoblastic leukemia 1 protein) (Megakaryocytic acute leukemia protein). [Source:Uniprot/SWISSPROT;Acc:Q969V6]

GCTTTCTCTCTCTCACTCTTCTTGAAGCCTTTCCTAACTCATATTTAGTGTTAGATGCCCCTCTTTTGGTTTTCCAGTT  
CCCAATTTTTTTTTTTTTTTT

In100 candidate353 (in intron):

LOCUS ENSG00000136267

DESCRIPTION Diacylglycerol kinase beta (EC 2.7.1.107) (Diglyceride kinase beta) (DGK-beta) (DAG kinase beta) (90 kDa diacylglycerol kinase).

[Source:Unprot/SWISSPROT;Acc:Q9Y6T7]

GAAGACTGTGTAACCTTCTGTTTTAATTGACACTCTTTATCGTATTTTTCCCTTCATTTTCAACTTACTACATCAGAATTG  
TCTGTCAATTCTCTATGTTT

In100 candidate354 (in intron):

LOCUS ENSG00000136267

DESCRIPTION Diacylglycerol kinase beta (EC 2.7.1.107) (Diglyceride kinase  
bta) (DGK-beta) (DAG kinase beta) (90 kDa diacylglycerol kinase).

[Source:Unprot/SWISSPROT;Acc:Q9Y6T7]

AACAACTTTTCTTTAACTGTATATGAGCCCTCTATACTTTTATTCTCCTCCACGTGTAGTTTGTTATTGTTATCAGAGTT  
TACTTATTATTTTCTATTG

In100 candidate355 (in intron):

LOCUS ENSG00000136267

DESCRIPTION Diacylglycerol kinase beta (EC 2.7.1.107) (Diglyceride kinase  
bta) (DGK-beta) (DAG kinase beta) (90 kDa diacylglycerol kinase).

[Source:Unprot/SWISSPROT;Acc:Q9Y6T7]

AACTAACATACAAGGCTTGATTCTTTGCACTTAGCTTTTTTCTCTCTCTCCCACATGTATTCAGTAACTTTGTCGTAGT  
GTTTTCTGTGTTACCTCTTT

In100 candidate356 (in intron):

LOCUS ENSG00000136267

DESCRIPTION Diacylglycerol kinase beta (EC 2.7.1.107) (Diglyceride kinase bta) (DGK-beta) (DAG kinase beta) (90 kDa diacylglycerol kinase).

[Source:Unprot/SWISSPROT;Acc:Q9Y6T7]

GAACCAAGTACTAACCCACGATCACATTTTCTTTCCTGTAAAGCTTCAGAATTTCTTTCTTCTCTCTGCAAAGTGATCCT  
TACAATAGATCTCATTTTTTC

In100 candidate357 (in intron):

LOCUS ENSG00000187546

DESCRIPTION CDNA FLJ16237 fis, clone HCASM2002754 (Hypothetical protein FLJ6237). [Source:Uniprot/SPTREMBL;Acc:Q6ZNB7]

GTGATAACCCCTTTATCATTTTTTTATTGTGTCTGTTTGATTCTTGTCACCTTTCTCCTTTATTAATCTGGCTACCAGTC  
TATTTTGTTAATCTTTTCAA

In100 candidate358 (in intron):

LOCUS ENSG00000187546

DESCRIPTION CDNA FLJ16237 fis, clone HCASM2002754 (Hypothetical protein FLJ6237). [Source:Uniprot/SPTREMBL;Acc:Q6ZNB7]

CATCAAACAAGTATGTTTTTCTGAATCAAAATAATTTTAAATTAAGTGTGACGTTTAATTCTTTCTGTGATTTTACAGCA  
CGTCTGTGTGTTCTTTCTCA

In100 candidate359 (in intron):

LOCUS ENSG00000187546

DESCRIPTION CDNA FLJ16237 fis, clone HCASM2002754 (Hypothetical protein FLJ6237). [Source:Uniprot/SPTREMBL;Acc:Q6ZNB7]

TTTGGGAAACAAGACCTAAAGTGTTAACTTTCCATTTTGTTACAAGTTTTTCCCTTCAGCTTGTGTAATCACTGCTCTTC  
AATGTTCCAGTTTCTGTTTC

In100 candidate360 (in intron):

LOCUS ENSG00000078674

DESCRIPTION Pericentriolar material 1 protein (PCM-1) (hPCM-1).

[Source:Unirot/SWISSPROT;Acc:Q15154]

TAACTGTTTGGTTTCTTATCACATTCTACTTGATACTTTTCCCCTTTTGGCAGGCTCTCCTGGTTTCCCTCCTGTCTT  
TCTGTACCTTATTAGTGTAT

In100 candidate361 (in intron):

LOCUS ENSG00000078674

DESCRIPTION Pericentriolar material 1 protein (PCM-1) (hPCM-1).

[Source:Unirot/SWISSPROT;Acc:Q15154]

AGCTAATTTGGATTAGCATTTCTAACCTCCTGACCTCTGTTGCTATCCTTGCTTTTATTTTACAGATGGTAACTTTTTTTT  
CCGATATGTTTATTCTTCCA

In100 candidate362 (in intron):

LOCUS ENSG00000078674

DESCRIPTION Pericentriolar material 1 protein (PCM-1) (hPCM-1).

[Source:Unirot/SWISSPROT;Acc:Q15154]

TATCTTTTGGTTTTACTTTGAGAGATTTTCTTTGACTTTAACACTTGTATGAAATTATTTTATTTTACAGCTGTCATATT  
TTAACTTCTGAACACTTTCT

In100 candidate363 (in intron):

LOCUS ENSG00000100380

DESCRIPTION Hsc70-interacting protein (Hip) (Suppression of tumorigenicity  
rotein 13) (Putative tumor suppressor ST13) (Protein FAM10A1)  
(Progesteronereceptor-associated p48 protein) (Renal carcinoma antigen NY-REN-  
33). [Soure:Uniprot/SWISSPROT;Acc:P50502]

TTTTTTTATATATATTTATTTTTTTAACTCTCCAAGGTAACAATAGGTTATTATTTTTTTCTTTTTCTGTTTTTCAGTT  
GTATTTTATTTTATTTTTTA

In100 candidate364 (in intron):

LOCUS ENSG00000136261

DESCRIPTION Basic leucine zipper and W2 domain-containing protein 2.  
[Sourc:Uniprot/SWISSPROT;Acc:Q9Y6E2]

TTAAATTGTTATTGCATAGAAAACCATATATTCTATACACCCTCCTTTTAACCAAGTACTTTACATTCTTTTATTCAGCT  
TGCTTTTTTCCACTATCAAT

In100 candidate365 (in intron):

LOCUS ENSG00000136261

DESCRIPTION Basic leucine zipper and W2 domain-containing protein 2.  
[Sourc:Uniprot/SWISSPROT;Acc:Q9Y6E2]

GAGGAATGATTGTTCATACCACCGTTAAGAGCGTTACTGTGTAACTATGTTTACCATCTTGTCTCTTTTTTGCCAGAT  
TTTTACTTTCACCTTATTTT

In100 candidate366 (in intron):

LOCUS ENSG00000106541

DESCRIPTION Anterior gradient protein 2 homolog precursor (Secreted cement

land protein XAG-2 homolog) (AG-2 protein) (hAG-2) (HPC8).

[Source:Uniprot/WISSPROT;Acc:O95994]

AGTAACTCCTTCCAAATTCTCCCTTAATTTTTTTGCTCTTTATCACATCCATTCAGCACTTTATCTCATGTTCTGCTCTA  
TCTTATTTATTATTTTCATGC

In100 candidate367 (in intron):

LOCUS ENSG00000140009

DESCRIPTION Estrogen receptor beta (ER-beta).

[Source:Uniprot/SWISSPROT;AccQ92731]

TGAGGAAGTTAAAAAATGCTTGACATCTCATTTATCTAGAGGTAAGTACTATTAGCATTTTAGTGTTCTTCTCTTCAGTC  
TTTTTGTTATGCATGTTTTT

In100 candidate368 (in intron):

LOCUS ENSG00000140009

DESCRIPTION Estrogen receptor beta (ER-beta).

[Source:Uniprot/SWISSPROT;AccQ92731]

TGAATTTTAAAAATCAAAGGATTTACTATAGTCTTATACTACATAATAACACACTTTCCTTTTGATTCTAGTTCTCAGGA  
AAGCCTTTTCTTCTTTTTTTT

In100 candidate369 (in intron):

LOCUS ENSG00000048052



DESCRIPTION Histone deacetylase 9 (HD9) (HD7B) (HD7).

[Source:Uniprot/SWISSROT;Acc:Q9UKV0]

GATTAACCATAAAATGTAATGGTTTCTTTCTGGATTCTAATTTCTATACCATTCATCTGTACATCTGTCCTTCTGCCAGTA  
CTTCTTTGTTGTATTATTAT

In100 candidate370 (in intron):

LOCUS ENSG00000048052

DESCRIPTION Histone deacetylase 9 (HD9) (HD7B) (HD7).

[Source:Uniprot/SWISSROT;Acc:Q9UKV0]

TTCATAGATTAACATAAAATGTGTTTGATATTTATCTTTGAAGTTTTATTTTTTATTTAGTATTCCTTCCCTCACCAGCA  
TACTTAATCTCCATTCTTTG

In100 candidate371 (in intron):

LOCUS ENSG00000048052

DESCRIPTION Histone deacetylase 9 (HD9) (HD7B) (HD7).

[Source:Uniprot/SWISSROT;Acc:Q9UKV0]

AGATCGTTATGGAAAGAGCTGCTTGTGGGCTTAACCTCTTTTCCTAGTTATCTCTGTTTTTCCAGATGTTCTTTTTCTTT  
CTCTAATCATTTTGAAATTG

In100 candidate372 (in intron):

LOCUS ENSG00000165807

DESCRIPTION Uncharacterized protein C14orf50.

[Source:Uniprot/SWISSPROT;AccQ96LQ0]

GTTTTTGCCGGTTATAAGTGATTAACATTTTAACATTCCACTTCTTTCCGATTTTCAGTAAGCTAATATTTTCATGTGT  
ATTTTCTGACTTTTCTCTTT

In100 candidate373 (in intron):

LOCUS ENSG00000004846

DESCRIPTION ATP-binding cassette sub-family B member 5 (P-glycoprotein ABCB)  
(ABCB5 P-gp). [Source:Uniprot/SWISSPROT;Acc:Q2M3G0]

GTAGCTAACATTTCTGGTCTCTTCCTTCCTTATTCTAGGTACCTATTTCCATTGGTATCATTTTCCTTCTGCATCCAGGT  
CTTTTTTTCACCTTTCTTAA

In100 candidate374 (in intron):

LOCUS ENSG00000105866

DESCRIPTION Transcription factor Sp4 (SPR-1).  
[Source:Uniprot/SWISSPROT;AccQ02446]

CCCTCTGTTGCCTTCCCTAACCCTCACAAGGGGATTTAATTTTTCTTTCCTCCTCCTCTGTCAGGAGGCCCATCATTACT  
TTTATTTGTCCTTCCTCTAT

In100 candidate375 (in intron):

LOCUS ENSG00000105877

DESCRIPTION Ciliary dynein heavy chain 11 (Axonemal beta dynein heavy  
chain11). [Source:Uniprot/SWISSPROT;Acc:Q96DT5]

AACTAGGATTAACATTCTGGCTATCTAACTTTTTTTTTTTTTTTAATCAGAAATTTTAACCACTATACCCTTTCTCTTG  
TGATTCTTTTGCCCGTAACT

In100 candidate376 (in intron):

LOCUS ENSG00000105877

DESCRIPTION Ciliary dynein heavy chain 11 (Axonemal beta dynein heavy chain11). [Source:Uniprot/SWISSPROT;Acc:Q96DT5]

ACCATTTCAATTTGTTGACATATAACTGTTCATAGTAGTCTCTTATGATCCTTTGTATTTCTGTCGTATCAGTTGTAATA  
ACTCTTCTTTCATTTCTGAT

In100 candidate377 (in intron):

LOCUS ENSG00000105877

DESCRIPTION Ciliary dynein heavy chain 11 (Axonemal beta dynein heavy chain11). [Source:Uniprot/SWISSPROT;Acc:Q96DT5]

CCCTAGAACCTACAAAAATTGTAGAGCCCTTCCTGTCACCACAATACTGTTGGTAGTTTTATTGATCCCTTTGCAGTT  
GTGATCCTTCCTCTGATTGT

In100 candidate378 (in intron):

LOCUS ENSG00000136237

DESCRIPTION Rap guanine nucleotide exchange factor 5 (Guanine nucleotide exchange factor for Rap1) (Related to Epac) (Repac) (M-Ras-regulated Rap GEF) MRGEF).

[Source:Uniprot/SWISSPROT;Acc:Q92565]

AGTGCTTGTAACCTAAGTGACTATTAACATGCCTTCTTTTCTTATGCAGCAGCATCTCCCCACAATTTCTTATTTTCAGA  
TCATAACTCTCTTCTTATTT

In100 candidate379 (in intron):

LOCUS ENSG00000136237

DESCRIPTION Rap guanine nucleotide exchange factor 5 (Guanine nucleotide

exchange factor for Rap1) (Related to Epac) (Repac) (M-Ras-regulated Rap GEF) MRGEF).

[Source:Uniprot/SWISSPROT;Acc:Q92565]

GTCGGGTGAGTCTAAGTGGCTCACCTTGACATACATCTGCTAACTTAATCTCTCTCTTAATCATTTCTATCTTGCCAGCA  
ATATTCTTTTGACCTTTT

In100 candidate380 (in intron):

LOCUS ENSG00000136237

DESCRIPTION Rap guanine nucleotide exchange factor 5 (Guanine nucleotide exchange factor for Rap1) (Related to Epac) (Repac) (M-Ras-regulated Rap GEF) MRGEF).

[Source:Uniprot/SWISSPROT;Acc:Q92565]

TCCATACACATACTTTCTGAAGCTATTTGCTCTGTTAACCACATCTTAGAGTCTGTTCTGTTGTATCTGTTTCATTCAGTT  
GCTCCATTAAATTTTTTTTTT

In100 candidate381 (in intron):

LOCUS ENSG00000156011

DESCRIPTION PH and SEC7 domain-containing protein 3 (Pleckstrin homology an SEC7 domain-containing protein 3) (Exchange factor for ADP-ribosylation factor guanine nucleotide factor 6) (Hepatocellular carcinoma- associated antigen 67).

[Source:Uniprot/SWISSPROT;Acc:Q9NYI0]

CTTTTGTAAGCTTTGGTCTGAGGGTCTTCTTATTCTTTTAACTGTGTGTTGGGTAACTTCCTCTATATGCTTCAGGT  
TGCCTAACTTTCTCTATAT

In100 candidate382 (in intron):

LOCUS ENSG00000197195

DESCRIPTION Churchill protein. [Source:Uniprot/SWISSPROT;Acc:Q8WUH1]

AAATCATTTTAACTGCTCCTTTGTGTTTTCTCTTAGTTTTCTTTCCTGTTTTCTCGAAGTGATACTCCTCAGCTTTTGTT  
CTGTGGTCTGGAACCTTCTT

In100 candidate383 (in intron):

LOCUS ENSG00000105889

DESCRIPTION Similar to Six transmembrane epithelial antigen of prostate.

[Source:Uniprot/SPTREMBL;Acc:Q6NZ63]

TTTATCCTTTCTCTGTAATCCTTTAACTGTACTTTTCTCTTGACGTTTGTTCCAGTTGTTAATTTATTGCCTTGCAGCTC  
CAAACCGTCCTTTTTGTCTT

In100 candidate384 (in intron):

LOCUS ENSG00000104611

DESCRIPTION SH2 domain-containing protein 4A (Protein SH(2)A).

[Source:Uniprot/SWISSPROT;Acc:Q9H788]

ACATATATATTTATAACTGTTCTTGCTGTATTGAACTCTTTATTATTGTATACTGGCCTTCTTTGTCTCTTCTTACAGTT  
TTCAGCTTCAGGTCTGCTTT

In100 candidate385 (in intron):

LOCUS ENSG00000104611

DESCRIPTION SH2 domain-containing protein 4A (Protein SH(2)A).

[Source:Uniprot/SWISSPROT;Acc:Q9H788]

AACCCCTTTGTCTTCCTGAATTCCTCTTTAATAACTCCAATATTTACTCTTTTGATGTTGTCCACAGACCCCATAGC  
TTTCTTCATGTCATTGTTTT

In100 candidate386 (in intron):

LOCUS ENSG00000125954

DESCRIPTION Protein farnesyltransferase subunit beta (EC 2.5.1.58) (CAAX farnesyltransferase subunit beta) (RAS proteins prenyltransferase beta) (FTasebeta). [Source:Uniprot/SWISSPROT;Acc:P49356]

TAAAGTAACACTAATTTAGAAATGCTGGTTTTCTCCTCTTCTTATTTATAAAATGTTTCTTTTCAGACTCTTCACATGC  
ATCTTTGACTTCACTATTTT

In100 candidate387 (in intron):

LOCUS ENSG00000125952

DESCRIPTION Protein max (Myc-associated factor X).

[Source:Uniprot/SWISSPRO;Acc:P61244]

AAAGAAAAATAACCTTCCTTCAATGCTGCTATCCTGCTATTACAACTACCATTTTTCACTTTTTTTTTTTTATACAGGG  
TCTCACTCTTTTTTTTTCAGG

In100 candidate388 (in intron):

LOCUS ENSG00000147408

DESCRIPTION Chondroitin beta-1,4-N-acetylgalactosaminyltransferase 1 (EC 2.1.1.174) (beta4GalNAcT-1). [Source:Uniprot/SWISSPROT;Acc:Q8TDX6]

CAAGTGATGAATAACTGATGTAGCCTGTTTTTTATTTTTATTTTTTGAGTGCAGTATTTTCTTGTTCACTAACTTTTCT  
ACAAATCATTTTCAGGCTTT

In100 candidate389 (in intron):

LOCUS ENSG00000147408

DESCRIPTION Chondroitin beta-1,4-N-acetylgalactosaminyltransferase 1 (EC 2.1.1.174) (beta4GalNAcT-1). [Source:Uniprot/SWISSPROT;Acc:Q8TDX6]

TCTCTGTTTTTTTAACACCCTTAGTCTTTTATCTGCTTTTACTTAAACCTTTATTGTGTCAGTAATTTGATTTTCTGACA  
TATCTATTCTGTACCTTCCT

In100 candidate390 (in intron):

LOCUS ENSG00000122550

DESCRIPTION Kelch-like protein 7. [Source:Uniprot/SWISSPROT;Acc:Q8IXQ5]

AGCTGACTTGTTAACCTGCTTAAGTTGGATCTTTTCCTTTCTACATCAGGTAGCTGACCTTTTATAGATTAGAATACCTTT  
CTTTTCTTTTCCTTATGAT

In100 candidate391 (in intron):

LOCUS ENSG00000122550

DESCRIPTION Kelch-like protein 7. [Source:Uniprot/SWISSPROT;Acc:Q8IXQ5]

AGGTTTGTCCATTTTGTTTTAACTTTTCAAAAAACAACCTTTTGTTTCATTGATCTTTTGTATTTTTTTCATTTTCAGTT  
TTATTTTTTCTCTGATCTTT

In100 candidate392 (in intron):

LOCUS ENSG00000122550

DESCRIPTION Kelch-like protein 7. [Source:Uniprot/SWISSPROT;Acc:Q8IXQ5]

AACATTTGTATGTGTAGTCTAATAAATTAACATATTCTTATATGTTTTTTGACTGTATCTTTGCATTGTCCTTTTCAGTT  
ATATTTTTTTCCTTACTGAA

In100 candidate393 (in intron):

LOCUS ENSG00000183066

DESCRIPTION WBP2 N-terminal like [Source:RefSeq\_peptide;Acc:NP\_689826]

TAATTTTCTTATTTCTGTCCTTCTGCTAACTTTGGGTCGAGTTTGTCCTCTTTTCTAGTTTCTTGATTTGTACAGTT  
AGGTTTTTTTTTTTTTTTTTTC

In100 candidate394 (in intron):

LOCUS ENSG00000136243

DESCRIPTION Nucleoporin-like 2 (NLP-1) (hCG1) (NUP42 homolog).

[Source:Unipot/SWISSPROT;Acc:O15504]

GCATTTTCCATGTTAAGCATTTAACTTTGCCTTTTTTAATGCACTTTTTCTTCTCTTTTCTTTTTTTGAGTCAGAGTCT  
TACTTTGTCATCCAGGCTTT

In100 candidate395 (in intron):

LOCUS ENSG00000033170

DESCRIPTION Alpha-(1,6)-fucosyltransferase (EC 2.4.1.68) (Glycoprotein 6-  
alpha-L- fucosyltransferase) (GDP-fucose--glycoprotein fucosyltransferase) (GD-  
LFuc:

N-acetyl-beta-D-glucosaminide alpha1,6-fucosyltransferase) (alpha1-6ucT)  
(Fucosyltransferase 8). [Source:Uniprot/SWISSPROT;Acc:Q9BYC5]

TCTTGAATTTCTCCAAGATTTGTATCTTGAAACCCTTTAACCCACCCCCCCTTTTTTTTTTTTTTGCCATATCCACAGTC  
TTTTTCGTGATTTTCCTTGAT

In100 candidate396 (in intron):

LOCUS ENSG00000033170



DESCRIPTION Alpha-(1,6)-fucosyltransferase (EC 2.4.1.68) (Glycoprotein 6-alpha-L- fucosyltransferase) (GDP-fucose--glycoprotein fucosyltransferase) (GD-LFuc:

N-acetyl-beta-D-glucosaminide alpha1,6-fucosyltransferase) (alpha1-6ucT) (Fucosyltransferase 8). [Source:Uniprot/SWISSPROT;Acc:Q9BYC5]

AGAAACCCTGACCCAACGGCTACCTTTGGGTAAAGTGTTGGGATCCTGTAACAAACTGCGAATTCTATCACTACAGTGTT  
TATCTCATTCATCTGCTTTT

In100 candidate397 (in intron):

LOCUS ENSG00000033170

DESCRIPTION Alpha-(1,6)-fucosyltransferase (EC 2.4.1.68) (Glycoprotein 6-alpha-L- fucosyltransferase) (GDP-fucose--glycoprotein fucosyltransferase) (GD-LFuc:

N-acetyl-beta-D-glucosaminide alpha1,6-fucosyltransferase) (alpha1-6ucT) (Fucosyltransferase 8). [Source:Uniprot/SWISSPROT;Acc:Q9BYC5]

GGAAGATAAGACTTTTTTAAATATATTGAAATAACTTGGTTAATAAATACTTTTTTCTCTTTTAGAAGCCAGGAACCT  
GTTCTCTTTCCATAGTGTCT

In100 candidate398 (in intron):

LOCUS ENSG00000033170

DESCRIPTION Alpha-(1,6)-fucosyltransferase (EC 2.4.1.68) (Glycoprotein 6-alpha-L- fucosyltransferase) (GDP-fucose--glycoprotein fucosyltransferase) (GD-LFuc:

N-acetyl-beta-D-glucosaminide alpha1,6-fucosyltransferase) (alpha1-6ucT) (Fucosyltransferase 8). [Source:Uniprot/SWISSPROT;Acc:Q9BYC5]

TGGTCCTGGACTTTTTTTTTTTGTTGGTAACTTTTAAATTACCATTTCAATCTTGTTGCTTGTTATTGTTCTGTTTCAGGG  
TATCTAATTCTTCCTGATTT

In100 candidate399 (in intron):

LOCUS ENSG00000033170

DESCRIPTION Alpha-(1,6)-fucosyltransferase (EC 2.4.1.68) (Glycoprotein 6-  
alpha-L- fucosyltransferase) (GDP-fucose--glycoprotein fucosyltransferase) (GD-  
LFuc:

N-acetyl-beta-D-glucosaminide alpha1,6-fucosyltransferase) (alpha1-6ucT)  
(Fucosyltransferase 8). [Source:Uniprot/SWISSPROT;Acc:Q9BYC5]

ATCTTCACATTTAAAGTGGATTTTGTACCTAACATATAGTTGGTCTTCTTTTTTTTTTAAATCCACTTGGACAGTCTCT  
GCCTCTTAACTGGTGTATTT

In100 candidate400 (in intron):

LOCUS ENSG00000033170

DESCRIPTION Alpha-(1,6)-fucosyltransferase (EC 2.4.1.68) (Glycoprotein 6-  
alpha-L- fucosyltransferase) (GDP-fucose--glycoprotein fucosyltransferase) (GD-  
LFuc:

N-acetyl-beta-D-glucosaminide alpha1,6-fucosyltransferase) (alpha1-6ucT)  
(Fucosyltransferase 8). [Source:Uniprot/SWISSPROT;Acc:Q9BYC5]

CTTAAGTGTTTTGTGTTTTGCTTCCTTTAACATGACTCTGCGTTTTTCATTTTCTTCTCTTACGATGTGGCCAGAATTTCTA  
CTTAATAATTCTTATATCTT

In100 candidate401 (in intron):

LOCUS ENSG00000171877

DESCRIPTION FERM domain-containing protein 5.  
[Source:Uniprot/SWISSPROT;AccQ7Z6J6]

CTATTTCTTCTATAACCCATTTTACATTCCTGTTACCACTTTTTGTTACTTTGCTGCATTTTCATCTTCGTTAGCCAGTT  
CCCTCTTTCAGTTATCATTT

In100 candidate402 (in intron):

LOCUS ENSG00000136231

DESCRIPTION insulin-like growth factor 2 mRNA binding protein 3

[Source:Refseq\_peptide;Acc:NP\_006538]

GGAGTTTAAGGGTCACCTCTACTATATATTGTTAGAATATTTAACTTCACCACTAACTTCATACCAATTTATTTTCAGTC  
TTAATTTTTCCTGGCTTTAT

In100 candidate403 (in intron):

LOCUS ENSG00000171723

DESCRIPTION Gephyrin. [Source:Uniprot/SWISSPROT;Acc:Q9NQX3]

AGTAACACTACTCTTTCCTTGTTTATCACTGATCTTTGTAGCCACTCATTCTCTACAGAATTTTCTTCCTCTGTGTGGT  
CTTAAATATCTGTGTTTTTT

In100 candidate404 (in intron):

LOCUS ENSG00000171723

DESCRIPTION Gephyrin. [Source:Uniprot/SWISSPROT;Acc:Q9NQX3]

TGTTTTCTTCTAACTTCTTTTTTAATTTTTTTGTATTTATTTATTTATTGCCCTCAAACATTCTCCTATCCAGTTATTGTT  
CTTTTATAAAGCTCATCTCT

In100 candidate405 (in intron):

LOCUS ENSG00000171723

DESCRIPTION Gephyrin. [Source:Uniprot/SWISSPROT;Acc:Q9NQX3]

TAACCTCTGTTTCTTATTTTCTTCTTTTTATCTCTTTGCTGAATTCTATATCACTTCTTGAGACCTGTCTTCCAGTT  
TATGAATTTTCCTTTCATCT

In100 candidate406 (in intron):

LOCUS ENSG00000171723

DESCRIPTION Gephyrin. [Source:Uniprot/SWISSPROT;Acc:Q9NQX3]

CATATGTTCTTTGGCTCTTTGAGATGTAGACTCTGTAGAGCTATTTAACTACCATTATTTTCTGGTGATTTTTTTCAGGT  
ACCTTTCTTTATGATTTATG

In100 candidate407 (in intron):

LOCUS ENSG00000171723

DESCRIPTION Gephyrin. [Source:Uniprot/SWISSPROT;Acc:Q9NQX3]

CCACTGGCTCCAATGGTCACACCCTAGCTCCTTTCATTACTAATAACTATCACTCCTCTATAACTTTCATTTTCAGTTATC  
ACTCTCTTCAGTTGTCACTT

In100 candidate408 (in intron):

LOCUS ENSG00000171723

DESCRIPTION Gephyrin. [Source:Uniprot/SWISSPROT;Acc:Q9NQX3]

TGTTTTCTGGTTGTTTTATAACTCCTTCTCCCTTTTTTACTTTCTTCATATGTGGTTTCAGTGATTTTCTCTGGTAGTA  
TCTTTTAATTTGTTGCTTTT

In100 candidate409 (in intron):

LOCUS ENSG00000171723

DESCRIPTION Gephyrin. [Source:Uniprot/SWISSPROT;Acc:Q9NQX3]

TTTCTGATATAACCCATTTAGGTATTATATGTAATCAATCTTTTTTGTCTTGTTTTTGTTCCTTTCTAAGACAGAGT  
TTTTCTCTCTGGCTCAGGCT

In100 candidate410 (in intron):

LOCUS ENSG00000171723

DESCRIPTION Gephyrin. [Source:Uniprot/SWISSPROT;Acc:Q9NQX3]

AGATGCCATACCTTTTATTTGTAATCCCTGACAAATTTAACGTTAGGCCAAAACTGTTTTATTTTGCTTTCAGACTTT  
CCTTTTTTTCCCATAGAGTA

In100 candidate411 (in intron):

LOCUS ENSG00000171723

DESCRIPTION Gephyrin. [Source:Uniprot/SWISSPROT;Acc:Q9NQX3]

AACAAGTCTTTCAAGTAAACCAAATCTATAACTCCAATCCATATCTTCTTCCTAAACTTCAGTTTTTTTTCCAATTGTCT  
GTTGTAGATCTTTTCTTAAA

In100 candidate412 (in intron):

LOCUS ENSG00000171723

DESCRIPTION Gephyrin. [Source:Uniprot/SWISSPROT;Acc:Q9NQX3]

TGTGATAACTTTTATACTCTTTTTTTCAATCTGTTATTTACCACTCACTTCAACTTTAGCAGTTCATCAATTCCTAACAT  
TTTATTTCCCTCCCTTAAAAT

In100 candidate413 (in intron):

LOCUS ENSG00000171723

DESCRIPTION Gephyrin. [Source:Uniprot/SWISSPROT;Acc:Q9NQX3]

CTTGATAAATTTTAAAATAATTTATTGTGCATCTTTTTTTTAACTTTAAAATTATCTTCTGATCATTCTGTTCAAGTTCTC  
TATTTTTTGGCACAGATTCC

In100 candidate414 (in intron):

LOCUS ENSG00000169193

DESCRIPTION coiled-coil domain containing 126

[Source:RefSeq\_peptide;Acc:NP620126]

CTTTTGCCTTAACATTTTCTGTTTTATCCCTGCCTCACTTTACCATTTTCTTTTATCTGTTTTGTAATATTCAGTG  
CTATTGTCTTCTATTCTGTC

In100 candidate415 (in intron):

LOCUS ENSG00000137770

DESCRIPTION CTD (carboxy-terminal domain, RNA polymerase II, polypeptide

A)small phosphatase like 2 [Source:RefSeq\_peptide;Acc:NP\_057480]

TATCAATTCATTATTCGTTCAAAGGGATTTTAAATATTAAGTTCATTCTGTTTAATTGATTTCCACTATTTTCAGTA  
TTTTCTGTTTTTCAGTTTGAT

In100 candidate416 (in intron):

LOCUS ENSG00000196335

DESCRIPTION Serine/threonine-protein kinase 31 (EC 2.7.11.1)

(Serine/threonine- protein kinase NYD-SPK) (Sugen kinase 396).

[Source:Uniprot/SWISSPROT;Ac:Q9BXU1]

TTAATGATACCTATTTGGTAAATTTCTCATTTATAACCTGAATTGTTTTTCTGATTTCTTTATATTATTTTTCAGAATTA  
TCTTTTATCTCACTGAACTT

In100 candidate417 (in intron):

LOCUS ENSG00000196335

DESCRIPTION Serine/threonine-protein kinase 31 (EC 2.7.11.1)  
(Serine/threonine- protein kinase NYD-SPK) (Sugen kinase 396).  
[Source:Uniprot/SWISSPROT;Ac:Q9BXU1]

TATTTCTATGCGTCAATAACTTTTTTAAAGGCATTACATTTTATTTCTTTAACAGAGTGTGACCAAACATATTTGTTTTT  
ATTTTTTATTTTTTTTATTTT

In100 candidate418 (in intron):

LOCUS ENSG00000072415

DESCRIPTION MAGUK p55 subfamily member 5.  
[Source:Uniprot/SWISSPROT;Acc:Q8NR9]

TATATGTATTTTCGTAAATGTATTTGTCTTAAGTTTCTTCTACTTTAACTTTCTGTTTATTATTTCTTCATTCTACCAGAA  
TTTATAGTTTTTCCAGTCTT

In100 candidate419 (in intron):

LOCUS ENSG00000072415

DESCRIPTION MAGUK p55 subfamily member 5.  
[Source:Uniprot/SWISSPROT;Acc:Q8NR9]

AGAGTTCTAGGCATTGGAAAGTAGGATTTTCTGATAAAGTAACTCTTGGTGATTGCTTTCTGTTGCCTGTTTCAGAGTCC  
ATTCTTTTACGTTTTAGACT

In100 candidate420 (in intron):

LOCUS ENSG00000134001

DESCRIPTION Eukaryotic translation initiation factor 2 subunit 1 (Eukaryoti  
translation initiation factor 2 subunit alpha) (eIF-2-alpha) (EIF- 2alpha)(EIF-  
2A). [Source:Uniprot/SWISSPROT;Acc:P05198]

TCATTTTAACGACTTTGTTGCCATTATTGTGAGCTTTTGCCTTGTTTTTCCTTCCATCCATCCAGCCTTGGATCAATGTT  
CCTGCCTTCTCTGTACTTGT

In100 candidate421 (in intron):

LOCUS ENSG00000134001

DESCRIPTION Eukaryotic translation initiation factor 2 subunit 1 (Eukaryoti  
translation initiation factor 2 subunit alpha) (eIF-2-alpha) (EIF- 2alpha)(EIF-  
2A). [Source:Uniprot/SWISSPROT;Acc:P05198]

AGCCTTATGTATCATAACTTTTTTACAATAGTTCTACCTTTACTTTTTACAGTGCTACTCCTCTTTTAGTCTTTATTTC  
TATTTTCATTTGCTCACTCA

In100 candidate422 (in intron):

LOCUS ENSG00000105926

DESCRIPTION MAGUK p55 subfamily member 6 (Veli-associated MAGUK 1) (VAM-  
1).[Source:Uniprot/SWISSPROT;Acc:Q9NZW5]

TGCTAACAAAAATAAAATGTTAAAATTCTCTTCTATTCTCAGCACCATCTGTTTTTCCCCCAGTTTAGTTTGCTTAGTTT  
ACCCGCTGTCACTGATGTTT



In100 candidate423 (in exon):

LOCUS ENSG00000070882

DESCRIPTION Oxysterol-binding protein-related protein 3 (OSBP-related protein 3) (ORP-3). [Source:Uniprot/SWISSPROT;Acc:Q9H4L5]

TGTATTGGCATAATTTGTTTGAATGTCTTTATTTTGATATTAACACCGGCATAAATCTATTTTGGCTACCAGATGATAGC  
TATTTTCATTTGCTCTATTT

In100 candidate424 (in intron):

LOCUS ENSG00000109684

DESCRIPTION mast cell immunoreceptor signal transducer  
[Source:RefSeq\_peptide;Acc:NP\_443196]

AGTTTTTTCTTATTTAACCTGCTTTGGATACGTTGGATATCCTGATTCTCTATTTTGTTGTTTTTCACTATTTCTCAGTA  
CTCTGTCATTATCTCTTTGA

In100 candidate425 (in intron):

LOCUS ENSG00000182185

DESCRIPTION DNA repair protein RAD51 homolog 2 (R51H2) (RAD51-like protein )  
(Rad51B). [Source:Uniprot/SWISSPROT;Acc:O15315]

ATAAGAAAACATAAAGCATAATAAAAGTAGGACTCCTTTCTTTTAACCTGCCTAACTCATGTTTATCCTTTATCTCAGGT  
GTCATCTTCTTCATTTGGCC

In100 candidate426 (in intron):

LOCUS ENSG00000182185

DESCRIPTION DNA repair protein RAD51 homolog 2 (R51H2) (RAD51-like protein )  
(Rad51B). [Source:Uniprot/SWISSPROT;Acc:O15315]

TAGACACCAATGGCGTCTACTCTCCCTTATCATATAACTATCTTAATATTTGAAGGTTGTTTTCATCTTCCTCTTCAGTT

TTTCTCTTTTCTCTTTTACC

In100 candidate427 (in intron):

LOCUS ENSG00000182185

DESCRIPTION DNA repair protein RAD51 homolog 2 (R51H2) (RAD51-like protein )  
(Rad51B). [Source:Uniprot/SWISSPROT;Acc:O15315]

TGCCTTTACAACCTGGACTTGGAGATAAATAATAACATTATACCCATTTTTTTTTTATCATGAAGCCTTTGACTTTCAGGG  
GATATCTATTCTTTATTCCT

In100 candidate428 (in intron):

LOCUS ENSG00000182185

DESCRIPTION DNA repair protein RAD51 homolog 2 (R51H2) (RAD51-like protein )  
(Rad51B). [Source:Uniprot/SWISSPROT;Acc:O15315]

GTTTTAACGTGCCTGTCTGTTTCATTCTGTCTTTTCAACTCTGTCATTTTCAGGCATGTTTCTATTAATTGCCTTTTTTCC  
TGATATGGGTCACATTTTTC

In100 candidate429 (in intron):

LOCUS ENSG00000139990

DESCRIPTION WD repeat protein 22 (Breakpoint cluster region protein 2)  
(BCR2). [Source:Uniprot/SWISSPROT;Acc:Q96JK2]

CCCTTTAATCTTAATAACAATGAAAATTATTATTTAACTTTTTTTTTTTTTATCTTGTAACGTATGCCAGGCCTTCTGCTA  
AGCACTTTACATGTCTTATT

In100 candidate430 (in intron):

LOCUS ENSG00000171763

DESCRIPTION spermatogenesis associated 5-like 1

[Source:RefSeq\_peptide;Acc:P\_076968]

AATATGGTTTTTAACTCTTACATAATACTCCATTGTTTCTTGTTTTATTTACTCATTCCCCAATTCATAGACATTCAGAA  
TCTTTTTTTATATCTATTTTA

In100 candidate431 (in intron):

LOCUS ENSG00000100647

DESCRIPTION Uncharacterized protein KIAA0247 precursor.

[Source:Uniprot/SWISPROT;Acc:Q92537]

TGATTCTACCACCCTAACATAATGTGTATTCTGTTTTTTCCATCTTCAGATGGTAGTACCTGTACATTCAGCTTTGTATT  
TTTTTCACTTAGCTTTTTTTT

In100 candidate432 (in intron):

LOCUS ENSG00000118564

DESCRIPTION F-box/LRR-repeat protein 5 (F-box and leucine-rich repeat protein 5) (F-box protein FBL4/FBL5) (p45SKP2-like protein).

[Source:Uniprot/SWISPROT;Acc:Q9UKA1]

TCCATCTTCCTAGAGCTTGTTTCTTATGGATCTTCCTCATTAACCGTCGGTTATTCTCTTTCTTTCATGTGTTTGCAGCC  
TTACTTCTGCTGACTACTTT

In100 candidate433 (in intron):

LOCUS ENSG00000137767

DESCRIPTION Sulfide:quinone oxidoreductase, mitochondrial precursor (EC 1.--  
.-). [Source:Uniprot/SWISSPROT;Acc:Q9Y6N5]

GGTCCCTGACATAACTTCCCTTTTTCTGCTCACATAATTCCTTTTTCTTCAGCTGTCTAGATGTCAACTTTGACTTTTTT  
TTTTCTTCCAGAAGCCTTTC

In100 candidate434 (in intron):

LOCUS ENSG00000004468

DESCRIPTION ADP-ribosyl cyclase 1 (EC 3.2.2.5) (Cyclic ADP-ribose hydrolase1)  
(cADPr hydrolase 1) (Lymphocyte differentiation antigen CD38) (T10) (Acue  
lymphoblastic leukemia cells antigen CD38). [Source:Uniprot/SWISSPROT;AccP28907]  
TTTTATTTTTTTAATTCCCTGATCATTAACATAAGTAATTATCTTTTTATGTGTTTATTTGTCATTCAGGTTTCTTCTGT  
GAAAAGCCTATTTCTGTCTT

In100 candidate435 (in intron):

LOCUS ENSG00000186976

DESCRIPTION DJ-1-binding protein (CAP-binding protein complex-interacting  
potein 1). [Source:Uniprot/SWISSPROT;Acc:Q5THR3]  
AGCTGGGAACATGGGAGGAAAGCCCCATGAAACTCATAACTTTGTCATTCTTCGAATTTTGATTTCTCCCTCCATCAGCC  
TTCTATTATTTACCTCAGAT

In100 candidate436 (in intron):

LOCUS ENSG00000106052

DESCRIPTION Tax1-binding protein 1 (TRAF6-binding protein).

[Source:UniprotSWISSPROT;Acc:Q86VP1]

CTTCTTGAACATATGGAATACACATGTTTAAATGTCCGTTCACTTAAGTTGATCATCTGGCTCATTTCTGTATCAGTTTTG  
ATTGATTGGCTTTTCTACTC

In100 candidate437 (in intron):

LOCUS ENSG00000106052

DESCRIPTION Tax1-binding protein 1 (TRAF6-binding protein).

[Source:UniprotSWISSPROT;Acc:Q86VP1]

TTCTCCCATGAATTATGAGTTTTTCCACTCTGGCTGGTAGGAATAACCACTATTCCTGGCCCTTTTTGAGTTCCAGGCAC  
TGTTCCCTGTAGTCCTTTTT

In100 candidate438 (in intron):

LOCUS ENSG00000106052

DESCRIPTION Tax1-binding protein 1 (TRAF6-binding protein).

[Source:UniprotSWISSPROT;Acc:Q86VP1]

GCTGTGTGATCTATTACTAATAGTGAAATGCCTAACATTGGATATTTCAAGTTCTTGTCTTGCTTTTCTTTTCCCAGTA  
GCTTTTTTTTTTTTTTTAACT

In100 candidate439 (in intron):

LOCUS ENSG00000146592

DESCRIPTION cAMP response element-binding protein 5 (CRE-BPa).

[Source:Unipot/SWISSPROT;Acc:Q02930]

ATTGCGCTTGTCTTTGTATTTATAAATAACATTCTTTCGGGTGCTTTCCCATGCATTATTTGCAGTTAAATGGTTTCCTT  
GCTAATACCTCTTACTTTCC

In100 candidate440 (in intron):

LOCUS ENSG00000007062

DESCRIPTION Prominin-1 precursor (Prominin-like protein 1) (Antigen AC133)  
CD133 antigen). [Source:Uniprot/SWISSPROT;Acc:043490]

AACTGAATTTTAGTACTTTTATAGGTAAAAGATAACTCAAAGATTCTCTTTTCTCTTCAGTGCCTCGTGTGTTATTATTA  
AAGTTCTTTTTTTTTGTTTT

In100 candidate441 (in intron):

LOCUS ENSG00000007062

DESCRIPTION Prominin-1 precursor (Prominin-like protein 1) (Antigen AC133)  
CD133 antigen). [Source:Uniprot/SWISSPROT;Acc:043490]

GTGAATTTTTTTTTCTTGGTACTGATTTTCTATACTTGTTTTAACTACTTTTTTCCTCTTGCTTAATCCTCTCAGCTTC  
CCTAACCAGCCTTTTTATTT

In100 candidate442 (in intron):

LOCUS ENSG00000169762

DESCRIPTION transmembrane anterior posterior transformation 1  
[Source:RefSe\_peptide;Acc:NP\_699196]

GTGTGCTACATCAAATAACTTTTGTAAGGAATTAATCTCTACTTCTGTACCCTTTTAGTTCCCTTCAGTTCTCTTTTAC  
TAGAAACAGGTTTTTTTTCC

In100 candidate443 (in intron):

LOCUS ENSG00000100731

DESCRIPTION Pecanex-like protein 1 (Pecanex homolog).

[Source:Uniprot/SWISSROT;Acc:Q96RV3]

TCTACTGAGAAATTAGATGTTAGTCTAATGGGGGTTTCCTTGATGTAACCTTAACCCTTTTTCTCTTGCTGTTTTCAGAA  
TTCTCTTTTTGTCTTTGACT

In100 candidate444 (in intron):

LOCUS ENSG00000136193

DESCRIPTION Secernin-1. [Source:Uniprot/SWISSPROT;Acc:Q12765]

CTAGTTTTCTCTTGATTAGCAAAATGAAATGTATAGAATAACAAGAAGTTTTTTTTTTTTTAGCTTATGTTTTGACAGCT  
CTCCAGTATTTTTTACTGTA

In100 candidate445 (in intron):

LOCUS ENSG00000106080

DESCRIPTION FK506-binding protein 14 precursor (EC 5.2.1.8) (Peptidyl-proly  
cis- trans isomerase) (PPIase) (Rotamase) (22 kDa FK506-binding protein) (KBP-  
22). [Source:Uniprot/SWISSPROT;Acc:Q9NWM8]

AGGTTCTGCGGATTTTAACAAAGCTCTTTTCACTTTTAAAGATTTTAAATTTCCCTTCTCAGAAATTCATTTTAATTTCT  
CCCCTCCCATGAAATGTCTT

In100 candidate446 (in intron):

LOCUS ENSG00000197555

DESCRIPTION Signal-induced proliferation-associated 1-like protein 1 (Highisk  
human papilloma viruses E6 oncoproteins targeted protein 1) (E6- targetd  
protein 1). [Source:Uniprot/SWISSPROT;Acc:O43166]

TATTGTTATCTGTGCCCCAACACCATCCACATAAAAAGATCAAAGTAACTACCTTGCTTGCTGATTTCCATATTCCAGTG

AGTTTCTGTGCTCTTTGTTT

In100 candidate447 (in intron):

LOCUS ENSG00000197555

DESCRIPTION Signal-induced proliferation-associated 1-like protein 1 (High risk human papilloma viruses E6 oncoproteins targeted protein 1) (E6- targeted protein 1). [Source:Uniprot/SWISSPROT;Acc:043166]

CTTTTTTTTTTCCCCCTAACCTTTTTTTTTTCCTTCTGTGCTTCAGTTTGGATAATTTCTATTAATATATCTTAAAGCTCC  
TTGTGTTTTTCTTTTCTTCC

In100 candidate448 (in intron):

LOCUS ENSG00000138944

DESCRIPTION OTTHUMP00000028979 (KIAA1644 protein).  
[Source:Uniprot/SPTREMBLAcc:Q5JZ71]

AACCTGTTGATTCTGTAAATTTTCTATGTAAGTTATCCACAATTAAGTGAATTTTGGTTCTTCTATTCCAGTCCTATT  
CTATGCTTATTTTCTTGTC

In100 candidate449 (in intron):

LOCUS ENSG00000106086

DESCRIPTION pleckstrin homology domain containing, family A (phosphoinositide binding specific) member 8 [Source:RefSeq\_peptide;Acc:NP\_116028]



TAGTTCTGCCTATTCTAAAACTTGATATAACTGGAATATTATACTTTTTTGCCTCTGGCTTTTCTCATACAGTATGTTTT  
TGAGATCCGTCCTTGTTTTTC

In100 candidate450 (in intron):

LOCUS ENSG00000106086

DESCRIPTION pleckstrin homology domain containing, family A (phosphoinositide  
binding specific) member 8 [Source:RefSeq\_peptide;Acc:NP\_116028]

CCTCCATCTTGGTCACTAACTAGCCTTCATTTGACCTTTTTGGTTTCCTCTTCAATCAGACTAGACAGTTGAACTCTATT  
ACTGGTTCTCCCCCTTTTTTTT

In100 candidate451 (in intron):

LOCUS ENSG00000166147

DESCRIPTION Fibrillin-1 precursor. [Source:Uniprot/SWISSPROT;Acc:P35555]

GGAGACACATTTTCCTTTTTCTAACATTGGACTCTTTCCTTCCTGCTAAGTCCTGCTTGTTTTTTTTTTCCTTCACAGTA  
TCTCTTTTATCTGTCCATTT

In100 candidate452 (in intron):

LOCUS ENSG00000182732

DESCRIPTION Regulator of G-protein signaling 6 (RGS6) (S914).

[Source:Uniprot/SWISSPROT;Acc:P49758]

GGGAGCCTCTTCAACTTGGCTCTTGATTCCTTTTGGTATAACTCTAGCACTATTTGATTCCTTCCTTTTTTATTACAGGC  
TCATCTTGTGTATTTTCCTGC

In100 candidate453 (in intron):

LOCUS ENSG00000182732

DESCRIPTION Regulator of G-protein signaling 6 (RGS6) (S914).

[Source:Uniprot/SWISSPROT;Acc:P49758]

GCCCCTGCCCCATGCTTTTGTTTTTTATTTGTCTAACTTTTTTTTTTTTTTTTTTGGAGATTTTCCATTCAGGCTTTTGT  
TGCTTTTCTCAAATGTCAAC

In100 candidate454 (in intron):

LOCUS ENSG00000182732

DESCRIPTION Regulator of G-protein signaling 6 (RGS6) (S914).

[Source:Uniprt/SWISSPROT;Acc:P49758]

GAGGAGAGGAAGGGAAGGAGTGGCCAATTCATTTTCGTAACAAACACCCAATTTTGTTTTTCTCCGTGGACTATCCAGAT  
GCATGCTTCTTTTACAGTTC

In100 candidate455 (in intron):

LOCUS ENSG00000182732

DESCRIPTION Regulator of G-protein signaling 6 (RGS6) (S914).

[Source:Uniprt/SWISSPROT;Acc:P49758]

AAAATAGGTGAATATAGCACAATAAGATATTGTAAGAGAGAGACTATATAACTTTTATTTACATAACTTTTCTTACAGTA  
TATTGCTATGATTTTTTCTCT

In100 candidate456 (in intron):

LOCUS ENSG00000186654

DESCRIPTION Rho GTPase-activating protein 8.

[Source:Uniprot/SWISSPROT;Acc:9NSG0]

CCATCTGATCTTAGGCTTTACTTTGTGGGAAGTTTTAAATTACTAATGTAACCTCTTTGCTTGTTATATTTATTCAGAT  
TTTATATTTCTTCTTGAGTC

In100 candidate457 (in intron):

LOCUS ENSG00000163257

DESCRIPTION CDNA FLJ20280 fis, clone HEP03525 (Chromosome 4 open reading frme  
30). [Source:Uniprot/SPTREMBL;Acc:Q9NXF7]

TATGTATTAAATGGTTTTACTTTTCATTTTTTTCTTAACCTTGTTCTTAATTTTTCTTAATTCTTATTCCAATACAGTT  
TTACTTTTTTTCATATAATG

In100 candidate458 (in intron):

LOCUS ENSG00000205683

DESCRIPTION Zinc-finger protein DPF3 (cer-d4).

[Source:Uniprot/SWISSPROT;Ac:Q92784]

CCCTGTGTACCTCATTTCTTCTCTTTCATGGTTTCCTAACTGGGGCTTTCACTGTTCTTTCCTTACTACTGGGCTCAGTA  
TTTTGTTCTTTTTCCCTTAA

In100 candidate459 (in intron):

LOCUS ENSG00000205683

DESCRIPTION Zinc-finger protein DPF3 (cer-d4).

[Source:Uniprot/SWISSPROT;Ac:Q92784]

GCTAACCTGTCTTGCAATGTGGGCAAACCATCATATCTATTTTTTAGTTTTCTTTTTCTTTTTCTTTTTCCCCCAGCT  
TGCTTTTTTGTTCCTGGG

In100 candidate460 (in intron):

LOCUS ENSG00000106105

DESCRIPTION Glycyl-tRNA synthetase (EC 6.1.1.14) (Glycine--tRNA ligase)

(G1RS). [Source:Uniprot/SWISSPROT;Acc:P41250]

TCTTTTGGTTTGGGATATTAGCATTTAGATATTTACAAATTAACATATTTGGATTTTTTTCTTTTTTAAATCATCCAGTTC  
TTCAGTTTCCCTGCTGTAGT

In100 candidate461 (in intron):

LOCUS ENSG00000120645

DESCRIPTION IQ motif and Sec7 domain-containing protein 3.

[Source:Uniprot/WISSPROT;Acc:Q9UPP2]

AGTCTTAACTTTGGTGTCTCTCTTTGATCTGTCTTTTCCAGTCTCTTGCTCTCGCTCGTTTTCTTTTTCTATCTATCTCT  
ATCATCCTGTTTCCTTTTTC

In100 candidate462 (in intron):

LOCUS ENSG00000165861

DESCRIPTION Zinc finger FYVE domain-containing protein 1 (Double FYVEcontaning  
protein 1) (Tandem FYVE fingers-1) (SR3).

[Source:Uniprot/SWISSPROT;Ac:Q9HBF4]

TCTAAAAGAGGAGTTTCTCCCTACTCTTGTCATCTAAACATGCTAACGTTGGATTTTTTTTTTTTTTTTTTAAACAGTTAC  
TGTTATTTTCCCACACTCTT

In100 candidate463 (in intron):

LOCUS ENSG00000178177

DESCRIPTION transcription factor MLR1

[Source:RefSeq\_peptide;Acc:NP\_710153]EXON

CTTGATAACCATGATCATTTTTTCATGTAAGATCTTAACTCCCTTTCCTCTCTTTGCCTTTGTCATATTTAACACTCAGAA  
TCTTATCTGTGTTTTAATTC

In100 candidate464 (in intron):

LOCUS ENSG00000119707

DESCRIPTION Probable RNA-binding protein 25 (RNA-binding motif protein 25)  
RNA- binding region-containing protein 7) (Protein S164).

[Source:Uniprot/SSIPROT;Acc:P49756]

GTTCTTTTAGAAGACTGGATCTCCTGGGCACTCTGTAAGTTTAAATTAAGTGGTTTGAGGATGTTTTGGGTTTCTCAGTT  
TTGTTTTCTTCTATTACTTC

In100 candidate465 (in intron):

LOCUS ENSG00000080815

DESCRIPTION Presenilin-1 (EC 3.4.23.-) (PS-1) (Protein S182) [Contains:  
Preenilin-1 NTF subunit; Presenilin-1 CTF subunit; Presenilin-1 CTF12 (PS1-  
CTF2)]. [Source:Uniprot/SWISSPROT;Acc:P49768]

GTTTAAATTTTCATCCTTAAATATAACTTTTAATGTAAGTATTTTGTAGCCAGAAAGGGCCCATGGTTGGTTTGTCTCTCC  
TTTGCATATCTCTTCTACTC

In100 candidate466 (in intron):

LOCUS ENSG00000145147

DESCRIPTION Slit homolog 2 protein precursor (Slit-2) [Contains: Slit homolog  
2 protein N-product; Slit homolog 2 protein C-product].

[Source:Uniprot/SSIPROT;Acc:O94813]

TTTGCTTCTCTCTATTTCATTTCTTAACTCGATTAAATTTTTTTTACATTTTATTTTGCTACCTTATTTTCTCCAGCCACAA  
TTTAAACTACTTTTTTCCCTT

In100 candidate467 (in intron):

LOCUS ENSG00000145147

DESCRIPTION Slit homolog 2 protein precursor (Slit-2) [Contains: Slit homolg  
2 protein N-product; Slit homolog 2 protein C-product].

[Source:Uniprot/SISSPROT;Acc:O94813]

ATTGTGATAATCCCCAACAACTATGACAAAGTTTGCTACCAATAACCTCTCCATCTTTGCATTTTTCTTTGTCTTCAGAG  
TGCTTTCAGCAGTTTTTCTT

In100 candidate468 (in intron):

LOCUS ENSG00000106121

DESCRIPTION CDNA: FLJ22374 fis, clone HRC06766. (Fragment).

[Source:UniprotSPTREMBL;Acc:Q9H6D2]

TTATTCTAGTTGGAATAATTATGGCATTATATTTTCTTTTTTACTCGAATAACTTCCTTTAGTATTTTTTTTTTAGCAGGT  
ATGTTAAATTTTTTTTTTCTA

In100 candidate469 (in intron):

LOCUS ENSG00000010379

DESCRIPTION Sodium- and chloride-dependent GABA transporter 2.

[Source:Unipot/SWISSPROT;Acc:Q9NSD5]

ATCCATGTAATTAGGTTTAACTCTATCATCCTATTATTTGTTTTCTCTTTGTCCTATCAGTTATTTGTTTCCCCCTTCCC  
TCTCCTCCTGCTTTTTTTTTT

In100 candidate470 (in intron):

LOCUS ENSG00000138593

DESCRIPTION Uncharacterized protein KIAA0256.

[Source:Uniprot/SWISSPROT;AccQ93073]

GTTTGTTAAACACTGAAAATATTTGTCAAGCCTGTTACATGTAACCACATAGGGGCTATTGTTTTTTGTTTTTAACAGAA  
TTTGTCTTCCTTTTTTAAAA

In100 candidate471 (in intron):

LOCUS ENSG00000120889

DESCRIPTION Tumor necrosis factor receptor superfamily member 10B

precursor(Death receptor 5) (TNF-related apoptosis-inducing ligand receptor 2)  
(TRAI receptor 2) (TRAIL-R2) (CD262 antigen).

[Source:Uniprot/SWISSPROT;Acc:O1473]

AGACTCTAGTAACCACCATTTCTATTCTCTGCTTCTGAGTTCAGTTGTTTTTTTTTTTTTTTTTTTGACACAAAAATTTCA  
CTTTTGTTGCCCAGGCTGTC

In100 candidate472 (in intron):

LOCUS ENSG00000156958

DESCRIPTION N-acetylgalactosamine kinase (EC 2.7.1.157) (GalNAc kinase)

(Gaactokinase 2). [Source:Uniprot/SWISSPROT;Acc:Q01415]

TTTGTTTTTGTTTGTTTGTTTAATAATATCCTTGTATATGCCTGTACTATAACTTAAAAAAATCATTGCTTTGTCAGTT  
TTTTTGGTATCTTTTAACTT

In100 candidate473 (in intron):

LOCUS ENSG00000156958

DESCRIPTION N-acetylgalactosamine kinase (EC 2.7.1.157) (GalNAc kinase)  
(Gaactokinase 2). [Source:Uniprot/SWISSPROT;Acc:Q01415]

TGGTTTGGTGGTGTTCGTAGTGGTAACATTTGAGTCCTTTCTCTTTCTTATTCATGAGTTTGCTCTACCAGTGGGCTTT  
ATACTTTTATGTGTTTTTCCT

In100 candidate474 (in intron):

LOCUS ENSG00000156958

DESCRIPTION N-acetylgalactosamine kinase (EC 2.7.1.157) (GalNAc kinase)  
(Gaactokinase 2). [Source:Uniprot/SWISSPROT;Acc:Q01415]

TGCAATTGCTCACTGTCTAGTAGTGCATAGTTTGTCTTATCTGTGTAAGTTATAAGTTCCTTAATGCAGAGGTT  
CTACTTCATGTGGCTTTCCT

In100 candidate475 (in intron):

LOCUS ENSG00000156958

DESCRIPTION N-acetylgalactosamine kinase (EC 2.7.1.157) (GalNAc kinase)  
(Gaactokinase 2). [Source:Uniprot/SWISSPROT;Acc:Q01415]

AGATTGCCTAAAAGAAAACTAATTTTAACTGTTTACAATTATCCATTTTTATATTCTTTCTCTTTTATTTGAAACAGAT  
TTTGTTTTAGAAATCTCTTT

In100 candidate476 (in intron):



LOCUS ENSG00000139044

DESCRIPTION N-acetyl-beta-glucosaminyl-glycoprotein 4-beta-Nacetylgalactosaminyltransferase

2 (EC 2.4.1.244) (NGalNAc-T2) (Beta- 1,4-Nacetylgalactosaminyltransferase III) (Beta4GalNAc-T3) (Beta4GalNAcT3).

[Source:Uniprot/SWISPROT;Acc:Q6L9W6]

ACATTTGTCATGATTAATGAACCAATATCGGATGTTATTATTAAGTCAAGTTCATACTGTATCCTGAATTCCTTTCAGAT  
ATCCCTTTTCTGTTCCCTAGA

In100 candidate477 (in intron):

LOCUS ENSG00000077935

DESCRIPTION Structural maintenance of chromosomes protein 1B (SMC1beta protin). [Source:Uniprot/SWISSPROT;Acc:Q8NDV3]

ACATGAAGATATGATTGCTTATTCCTTCATATAACAAATATTTATGGTTTCTATCTTGTTTCACAGTAACATCTTTACCCC  
TTCAGATTGTATCTTATTTT

In100 candidate478 (in intron):

LOCUS ENSG00000166262

DESCRIPTION Uncharacterized protein C15orf33.

[Source:Uniprot/SWISSPROT;AccQ96M60]

TGTTCCGATTTTCTTTAACTTCCCTTTTGATTCTTCTTTGACCCATTGGCCAGGATTACATTGATTTCAGATGTTTT  
TTAATTTTCCCACATTCCTC

In100 candidate479 (in intron):

LOCUS ENSG00000145536

DESCRIPTION ADAMTS-16 precursor (EC 3.4.24.-) (A disintegrin and

metalloproeinase with thrombospondin motifs 16) (ADAM-TS 16) (ADAM-TS16).

[Source:Unirot/SWISSPROT;Acc:Q8TE57]

CAATCGATTTTGTCTCTCTACGATTTTAAACGTTGTATTTAGTCTGTTTTGCCCTACAGACATTTTGGTATTTTATAA  
AATCACTGCTTTCCTATTTTC

In100 candidate480 (in intron):

LOCUS ENSG00000185774

DESCRIPTION Kv channel-interacting protein 4 (KChIP4) (A-type potassium  
channel modulatory protein 4) (Potassium channel-interacting protein 4)  
(Calsenlin-like protein). [Source:Uniprot/SWISSPROT;Acc:Q6PIL6]

AGTAACTTTGTCAAAATACATTTATATTGGCTTTCCTCCATCCTTGTATCAGTCTCTATGCTTTTCTCACTCCTCCTTCC  
TGAGATTATGTCTTTAGTAA

In100 candidate481 (in intron):

LOCUS ENSG00000185774

DESCRIPTION Kv channel-interacting protein 4 (KChIP4) (A-type potassium  
channel modulatory protein 4) (Potassium channel-interacting protein 4)  
(Calsenlin-like protein). [Source:Uniprot/SWISSPROT;Acc:Q6PIL6]

TTGGTTTTATCCATCCTAAGAAGGCTGAATTAGCTGATGGGACTGATAACATGCGAATGCCTTTCTCTACTTATGCAGTA  
GTTTCTCCTCTCTTTTCTTT

In100 candidate482 (in intron):

LOCUS ENSG00000185774

DESCRIPTION Kv channel-interacting protein 4 (KChIP4) (A-type potassium channel modulatory protein 4) (Potassium channel-interacting protein 4) (Calsenlin-like protein). [Source:Uniprot/SWISSPROT;Acc:Q6PIL6]

TTCATTTTGCAACCTGCACTCTGTCTTTAATAACTGTGGTTTTATTGCTAGCCATTTTTCAGGTACCAGCCTTTGGCTAA  
ATTTTATTCTATTTTACTTT

In100 candidate483 (in intron):

LOCUS ENSG00000060237

DESCRIPTION Serine/threonine-protein kinase WNK1 (EC 2.7.11.1) (Protein kinase with no lysine 1) (Protein kinase, lysine-deficient 1) (Kinase deficient protein) (Erythrocyte 65 kDa protein) (p65). [Source:Uniprot/SWISSPROT;Acc:9H4A3]

TTGATAATAATAACTAATTGTATTTCTCTTTTGTCTTTTGTATATTTTTGCCTTCAGGTGCTTTTCTCCCCTAACCAG  
TTTTCATAAGTTCCTTATAT

In100 candidate484 (in intron):

LOCUS ENSG00000187105

DESCRIPTION HEAT repeat-containing protein 4.

[Source:Uniprot/SWISSPROT;Acc:Q86WZ0]

ACAATTTGTCCATCACCCTCTTGGTGATAACCATGTGGAAGATCTATCAATTACTCTGGTTTCTCAGTTCCTTAATCTC  
ATTATCTCCCATGATCTTTT

In100 candidate485 (in intron):

LOCUS ENSG00000104043

DESCRIPTION Probable phospholipid-transporting ATPase IM (EC 3.6.3.1) (ATPase class I type 8B member 4). [Source:Uniprot/SWISSPROT;Acc:Q8TF62]

TGATAAACCTTTAACCATATATCTTATCTTTTTATGCTCTTTTCTGAAATTTTAACTTTTCATCTTTCATATGCAGTT

TTCATATTTTCTACTGACCA

In100 candidate486 (in intron):

LOCUS ENSG00000104043

DESCRIPTION Probable phospholipid-transporting ATPase IM (EC 3.6.3.1) (ATPase class I type 8B member 4). [Source:Uniprot/SWISSPROT;Acc:Q8TF62]

ACTTTTTTCTTTCCATCTTTATCTCTTTCTTAACTTCCTTGCCCCTCTTATTTTATTTTATTTTTCAGTTTCCTCCATCTATTTCCCTTCTGTCTTTT

In100 candidate487 (in intron):

LOCUS ENSG00000104043

DESCRIPTION Probable phospholipid-transporting ATPase IM (EC 3.6.3.1) (ATPase class I type 8B member 4). [Source:Uniprot/SWISSPROT;Acc:Q8TF62]

CCAAAAAAAAAAAAAAAAACCAAAAAATTATTGACAAGGCTCAAGGCTCTAACATTTGGTAAGACTGGTTGTTTTTCAGTGCTCTTTTTTTCCCCTAGATT

In100 candidate488 (in intron):

LOCUS ENSG00000104043

DESCRIPTION Probable phospholipid-transporting ATPase IM (EC 3.6.3.1) (ATPase class I type 8B member 4). [Source:Uniprot/SWISSPROT;Acc:Q8TF62]

TTGGATTTACTTATTTTTTTCCTGCATTTTAATCAATAACTTCTGCTTCTTTATTAATGCCTTCTTCGTTTCCTTACAGTTTTTGTTTTTGCTTTTCCCTA

In100 candidate489 (in intron):

LOCUS ENSG00000154678

DESCRIPTION Calcium/calmodulin-dependent 3',5'-cyclic nucleotide  
phosphodiesterase 1C (EC 3.1.4.17) (Cam-PDE 1C) (hCam-3).

[Source:Uniprot/SWISSPROT;Ac:Q14123]

GGCTGAAGGTTTATGGATGGGGAGCACAAAGCGGTCTTTATATAACATGTTTAGTGTCTGAATTCTCCTTTGTCTCAGAA  
TATCCTTTGCCTGATTTGCT

In100 candidate490 (in intron):

LOCUS ENSG00000154678

DESCRIPTION Calcium/calmodulin-dependent 3',5'-cyclic nucleotide  
phosphodiesterase 1C (EC 3.1.4.17) (Cam-PDE 1C) (hCam-3).

[Source:Uniprot/SWISSPROT;Ac:Q14123]

TCTGGCTATGGTTTTTGTTTAATAATACTGGAAACAAAAACCACACAACAACTAACATTTGTTAAGTGCTTTTTATGTCAGGC  
GCTGTTCTAATTACTTTTTC

In100 candidate491 (in intron):

LOCUS ENSG00000154678

DESCRIPTION Calcium/calmodulin-dependent 3',5'-cyclic nucleotide  
phosphodiesterase 1C (EC 3.1.4.17) (Cam-PDE 1C) (hCam-3).

[Source:Uniprot/SWISSPROT;Ac:Q14123]

ATAAACTGTGAGATTGTAAGGTTAACTTGATTTGAAGTAGAATTCTCTCTTCTTATCTATTGTTTCAGAACTAATAGGT  
TTCATTGACTTTTCTCCTCC

In100 candidate492 (in intron):

LOCUS ENSG00000154678

DESCRIPTION Calcium/calmodulin-dependent 3',5'-cyclic nucleotide  
phosphodiesterase 1C (EC 3.1.4.17) (Cam-PDE 1C) (hCam-3).

[Source:Uniprot/SWISSPROT;Ac:Q14123]

TAATTGTGGTTTGGTGGTTTTCTGTAGTGGTAACATTTGGGTCTTTTCTCTTCCTCATTTGTGTATTTGCTTTACCAAGTG  
AGTTTTTTCCTTTTGCATTT

In100 candidate493 (in intron):

LOCUS ENSG00000002016

DESCRIPTION DNA repair protein RAD52 homolog.

[Source:Uniprot/SWISSPROT;AccP43351]

CCGATTTAACGGAATTCTTTGTTGGTGTTCATACTTACCGTGAGTTTTCTTTTTCAGGGTGATATTTTAGTTCCATCT  
TAGGCTCTCCATTGTCCTCT

In100 candidate494 (in intron):

LOCUS ENSG00000105778

DESCRIPTION KIAA0241 (KIAA0241), mRNA [Source:RefSeq\_dna;Acc:NM\_015060]

GAGGCACAAAGAGAGCCCATGGAACATCATAACCATGTTATTCTTTGGGTCTCAAGTCTGTCTTCTCTCTACTTTTCAGTC  
TTCTTATGTTTGATTTGTAT

In100 candidate495 (in intron):

LOCUS ENSG00000105778

DESCRIPTION KIAA0241 (KIAA0241), mRNA [Source:RefSeq\_dna;Acc:NM\_015060]

AGACACAAACCTGCATAACAAACCTTACCTTTATTTATCATACTTTTCTTGGTCACTATCCCATAGCTCAGTCCCCCAT  
ATCTTTCTTTCTTTGATTTA

In100 candidate496 (in intron):

LOCUS ENSG00000130638

DESCRIPTION Ataxin-10 (Spinocerebellar ataxia type 10 protein) (Brain protein  
E46 homolog). [Source:Uniprot/SWISSPROT;Acc:Q9UBB4]

ATGTTTTTAATAGTTGAATAATATTTAACTATATAGACTCATCATAATTTTTTCATTTGTTCCCTATAGACTTTCCAGCT  
GCTTTCAGGTTGCTTTTTTTT

In100 candidate497 (in intron):

LOCUS ENSG00000140043

DESCRIPTION Zinc-binding alcohol dehydrogenase domain-containing protein 1 EC  
1.-.-.-). [Source:Uniprot/SWISSPROT;Acc:Q8N8N7]

TCTAGTGGTAACCTTTCCTTCTTACAAATTTTCTCATACTCAAATTTTCTAATTCCTACTTCCTATTTTTTTCAGAC  
TTCATTATTATTACTTTTAT

In100 candidate498 (in intron):

LOCUS ENSG00000082805

DESCRIPTION ELKS/RAB6-interacting/CAST family member 1 (RAB6-interacting  
protein 2) (ERC protein 1). [Source:Uniprot/SWISSPROT;Acc:Q8IUD2]

AGGAATCTGTATTTGTGAAGGTTAACTGAACCTTTTTTGTTTGCTTACCATCTATTCAGTGTTTTCCCTATTCTTTGTTT  
TATTTATTTAGTAATTTAAA

In100 candidate499 (in intron):

LOCUS ENSG00000082805

DESCRIPTION ELKS/RAB6-interacting/CAST family member 1 (RAB6-interacting  
prtein 2) (ERC protein 1). [Source:Uniprot/SWISSPROT;Acc:Q8IUD2]  
TTAACATCCTTTCTAATCTTCATTATTTGTGGTATCTCTGCTCAAAGGTTCTTCCATTATCTTCCTCACCAGCCATCTTC  
TGCTCATCTTTACATGCTTT

In100 candidate500 (in intron):

LOCUS ENSG00000082805

DESCRIPTION ELKS/RAB6-interacting/CAST family member 1 (RAB6-interacting  
prtein 2) (ERC protein 1). [Source:Uniprot/SWISSPROT;Acc:Q8IUD2]  
AGATGCTATCAACATTCCCTTCCATGCTTCTGTAACTTCTGTTTATTTTCGTTTTGCTTGCATCTCCAGTTTCCTAGGTTT  
GTTTTTTTTTTTTTGTCTTAG

In100 candidate501 (in intron):

LOCUS ENSG00000082805

DESCRIPTION ELKS/RAB6-interacting/CAST family member 1 (RAB6-interacting  
prtein 2) (ERC protein 1). [Source:Uniprot/SWISSPROT;Acc:Q8IUD2]  
ATCTTGACCTGCCTGTGAATCTTTAACATGTTTTATCTCTTCTTATTTCTGGAACTTTCTTTATCTTTGGCTTCCAGGG  
GACCACCTTCTTTTTGTTTT

In100 candidate502 (in intron):

LOCUS ENSG00000119725



DESCRIPTION Zinc finger protein 410 (Zinc finger protein APA-1) (Another  
patner for ARF 1). [Source:Uniprot/SWISSPROT;Acc:Q86VK4]

AGTTTAACAATTAGCTATGATGGTTTTAATGCTTTTTCTTTTCAGTTCAGCATGCCTATACTACTTACTCTGTGTCACTT  
TTCTCTGTTCTAGTAATTTT

In100 candidate503 (in intron):

LOCUS ENSG00000104689

DESCRIPTION Tumor necrosis factor receptor superfamily member 10A  
precursor(Death receptor 4) (TNF-related apoptosis-inducing ligand receptor 1)  
(TRAI receptor 1) (TRAIL-R1) (CD261 antigen).

[Source:Uniprot/SWISSPROT;Acc:O0020]

TACTATATACAAAAATTATCTCAAAATTCATCAATAACATTCCTTTTCCATGTTCTTCAAGTTTTCTGTTTCCTACAGTT  
TCTGGTTCTTCTATTCAACA

In100 candidate504 (in intron):

LOCUS ENSG00000104689

DESCRIPTION Tumor necrosis factor receptor superfamily member 10A  
precursor(Death receptor 4) (TNF-related apoptosis-inducing ligand receptor 1)  
(TRAI receptor 1) (TRAIL-R1) (CD261 antigen).

[Source:Uniprot/SWISSPROT;Acc:O0020]

AGGAGTAGTTTTGATAACTAAGTCAAAATCTTTACTTGCTATATGTCTATTACATTGTCTCTTTCATCTTGATTCAGTT  
TCAGTAGTTTGTGTCTTTCT

In100 candidate505 (in intron):

LOCUS ENSG00000186951

DESCRIPTION Peroxisome proliferator-activated receptor alpha (PPAR-alpha).

Source:Uniprot/SWISSPROT;Acc:Q07869]

TGCCTCATTTTATTGTTTTTCACATTAAATGTAACGACATTTAAAGTTCTGTATTTGTCCTAATCATTCCAGACTTCTTA  
GAAGAACTATTTCTTTCTTT

In100 candidate506 (in intron):

LOCUS ENSG00000078295

DESCRIPTION Adenylate cyclase type 2 (EC 4.6.1.1) (Adenylate cyclase type I)  
(ATP pyrophosphate-lyase 2) (Adenylyl cyclase 2).

[Source:Uniprot/SWISSPRT;Acc:Q08462]

AGCATCTAGTAAAGCTTGTTCCACACGTAACATTACCTCGCTCTTGTTCTTATAGTTATATTTATCTCCAGTTTCTTCTC  
TGTTTCCTCTAATGATAATG

In100 candidate507 (in intron):

LOCUS ENSG00000081665

DESCRIPTION Zinc finger protein 93 (Zinc finger protein 505) (Zinc finger  
potein HTF34). [Source:Uniprot/SWISSPROT;Acc:P35789]

TTGAAGTTTGTTTATAAAATTATGTTTATTGAGATGAAATTCACATAACATCAAATTCAATATCTTAATTATTTTCAGGT  
TTACAGTTCAGTGTCTTTTT

In100 candidate508 (in intron):

LOCUS ENSG00000109606

DESCRIPTION Putative pre-mRNA-splicing factor ATP-dependent RNA helicase DH15 (EC 3.6.1.-) (DEAH box protein 15) (ATP-dependent RNA helicase #46).

[Sorce:Uniprot/SWISSPROT;Acc:O43143]

CTTCTAGAAATATTAAATGCCGGTTATGCTTATTCAAGTTTCACCTGTAAACCTTATGTATGTCGTTGTTTGCTTCAGTCTAGTTGCTGATTATTTTTC

In100 candidate509 (in intron):

LOCUS ENSG00000122507

DESCRIPTION Protein PTHB1 (Parathyroid hormone-responsive B1 gene protein) Bardet-Biedl syndrome 9 protein). [Source:Uniprot/SWISSPROT;Acc:Q3SYG4]

TTTTTTTTTCCACTTCCTTCGAGATAACTCACTTCTGGCTTTGTTTTGATCTCAGTGAATGCCCCTGTTAAGCTTCTGGTAGATTCCTCTTCTTTTTTCTT

In100 candidate510 (in intron):

LOCUS ENSG00000122507

DESCRIPTION Protein PTHB1 (Parathyroid hormone-responsive B1 gene protein) Bardet-Biedl syndrome 9 protein). [Source:Uniprot/SWISSPROT;Acc:Q3SYG4]

CTCATAAATAAATTTATCTAATCTGTCTTCTCTTAACCACACAAGATTTCCATAAACCTTTTCATTTTGCATTTTCCAGCTTTCTATATTCATCTTGTTTT

In100 candidate511 (in intron):

LOCUS ENSG00000122507

DESCRIPTION Protein PTHB1 (Parathyroid hormone-responsive B1 gene protein) Bardet-Biedl syndrome 9 protein). [Source:Uniprot/SWISSPROT;Acc:Q3SYG4]

AAGTTAAGTGCATATCTTTGATTCTTCATAGATTATGGGAAATATGTAACTTCTGGGTCGTATGTTTGCTTTTTTCAGTTTATTTTTTCTGGTTGGTGCT

In100 candidate512 (in intron):

LOCUS ENSG00000122507

DESCRIPTION Protein PTHB1 (Parathyroid hormone-responsive B1 gene protein)

Bardet-Biedl syndrome 9 protein). [Source:Uniprot/SWISSPROT;Acc:Q3SYG4]

AGTTGGCTTAAGCAAGAATAGGAAGTTGACTGGCTAACGTCACCTTGAGCCTTCTCTGTGATCAGATCTGGTTTCTCTCTT  
TTCATCTCTTGCTTCCATTT

In100 candidate513 (in intron):

LOCUS ENSG00000122507

DESCRIPTION Protein PTHB1 (Parathyroid hormone-responsive B1 gene protein)

Bardet-Biedl syndrome 9 protein). [Source:Uniprot/SWISSPROT;Acc:Q3SYG4]

TAGCACTGTGTTATAATGTATATTTCCCTATTGGTAACCCTGAATGCTATTTCCCTCTTAAGTAGGTGTCTCTTTCCAGCT  
TCATTTTCCCTGTGTTACTA

In100 candidate514 (in intron):

LOCUS ENSG00000122507

DESCRIPTION Protein PTHB1 (Parathyroid hormone-responsive B1 gene protein)

Bardet-Biedl syndrome 9 protein). [Source:Uniprot/SWISSPROT;Acc:Q3SYG4]

TGGCTACTGTGTAACACTCCTCATCCATTTTCTCCTTCAGTCTATGTTCTACCCATGATAAATTGCTATTTTCTCCCAA  
ATTCTCTTGCCCTTTTGTGT

In100 candidate515 (in intron):

LOCUS ENSG00000122507

DESCRIPTION Protein PTHB1 (Parathyroid hormone-responsive B1 gene protein)  
Bardet-Biedl syndrome 9 protein). [Source:Uniprot/SWISSPROT;Acc:Q3SYG4]

CTCAAGTCCTGGGCTTTTCTTTGGTAGGAGACTTTGTATAACTGATTCAATCTTCTTACTCGTTATTGCTCTGTTTCAGAT  
TTTCTATTTCTTCCTAGTTC

In100 candidate516 (in intron):

LOCUS ENSG00000122507

DESCRIPTION Protein PTHB1 (Parathyroid hormone-responsive B1 gene protein)  
Bardet-Biedl syndrome 9 protein). [Source:Uniprot/SWISSPROT;Acc:Q3SYG4]

TCCCAAAGAAAATTATAACATTATACGTAATGCTAAATTTCCCATCTTGGTTCCTTATCATCTGCTCAGAAATGTAATCA  
TTCTTACTGTTTTTGTCT

In100 candidate517 (in intron):

LOCUS ENSG00000081014

DESCRIPTION AP-4 complex subunit epsilon-1 (Adapter-related protein complex4  
epsilon-1 subunit) (Epsilon subunit of AP-4) (AP-4 adapter complex epsilo  
subunit). [Source:Uniprot/SWISSPROT;Acc:Q9UPM8]

ATGTCCTTTAACATTCTCTTTCTCTCTTCCATATTCCAAATCAAATTTTATTTCTCCTGTGATCACTCAGGTGGCTCCT  
ACCATCTGTTACCTTTTGTT

In100 candidate518 (in intron):

LOCUS ENSG00000081014

DESCRIPTION AP-4 complex subunit epsilon-1 (Adapter-related protein complex4  
epsilon-1 subunit) (Epsilon subunit of AP-4) (AP-4 adapter complex epsilo

subunit). [Source:Uniprot/SWISSPROT;Acc:Q9UPM8]

AGGATTGGGACTAACTGAATGTGCTCCTTCTGTGTCATGCCTCATTTTGGATGGCTGTTTTTCTTCAGAAATCCTGTTCC  
CTACTGATTTTTCTTACGTT

In100 candidate519 (in exon):

LOCUS ENSG00000197217

DESCRIPTION Ectonucleoside triphosphate diphosphohydrolase 4 (EC 3.6.1.6)  
(TPDase 4) (Uridine-diphosphatase) (UDPase) (Lysosomal apyrase-like protein f 70  
kDa). [Source:Uniprot/SWISSPROT;Acc:Q9Y227]

AAATGATAATCCTCTTTTTTCTCTATCTTGAAAGCTCTAACCTGAAGAGGGTGATTTTTTTTTTTATTTATTG TTCAGGT  
CTGTTACTGTATATGTTTTTC

In100 candidate520 (in intron):

LOCUS ENSG00000181982

DESCRIPTION CDNA FLJ43363 fis, clone NT2RP7017474.

[Source:Uniprot/SPTREMBLAcc:Q6ZUS6]

TTATTCTTATTGTTTTGCTTTATAATACTTCTAATATCTTTTTGGGCTAACCTTCTTCACTTTGCTCTTCCTTTTCAGAG  
GTTTCTTATATGTTACTTTT

In100 candidate521 (in intron):

LOCUS ENSG00000183578

DESCRIPTION tumor necrosis factor, alpha-induced protein 8-like 3

[Source:RefSeq\_peptide;Acc:NP\_997264]

ACAATTAATGTTGCTGCTGTTATTATCACATTAATATAACTGCCTAAAGAGATTTGTTTTGAATTTTCTCCTTTTCAGTC  
TCTTGTTTCATTATCTCTGGT

In100 candidate522 (in intron):

LOCUS ENSG00000167981

DESCRIPTION Zinc finger protein 597. [Source:Uniprot/SWISSPROT;Acc:Q96LX8]

EXON

GAATAACCCTTCTAAGGTTTCCTGGTCCTGTTTGTAACCTTAGCTTACTTTTTCCCAGTATCCCTTGAAGATATTG  
TCTATGTTTTGCTTTCTTTT

In100 candidate523 (in intron):

LOCUS ENSG00000197085

DESCRIPTION AAA1 protein isoform IV [Source:RefSeq\_peptide;Acc:NP\_997169]

TTTGGCTGAGAAATTTTCTGCTAGCCTTGTTATAACTCTCTTATATGTGATTTGCCTCTTCTCTCTTGCTGTTATCAGGA  
TTTTCTCTGTTTTTGATTTT

In100 candidate524 (in intron):

LOCUS ENSG00000197085

DESCRIPTION AAA1 protein isoform IV [Source:RefSeq\_peptide;Acc:NP\_997169]

AGTAACTCTAAGCTTAAATTTGACTTTTTTCCTCTGCAGTTATGATTTGATATTTTCCATGCCCTTTCTATTTCAATTTCT  
TATTTTTTCATTGTGTTGGGT

In100 candidate525 (in intron):

LOCUS ENSG00000197085

DESCRIPTION AAA1 protein isoform IV [Source:RefSeq\_peptide;Acc:NP\_997169]

AGCTCATTTTTTAACATGATCAAAATAGAATCTTTATTTCTATCATTACTATCTTTTCTCCCAGTCTTTCCTACCTGAATA  
ACTAGTTCCAGTTTCTTTTT

In100 candidate526 (in intron):

LOCUS ENSG00000104093

DESCRIPTION Protein DmX-like 2 (Rabconnectin-3).

[Source:Uniprot/SWISSPROT;cc:Q8TDJ6]

CTATGGTAAGCCTATTTTTATAACCCTGGAAGACATTATTATTTTACAGAGTCAATGCTTACTTAGATTTACCCATATGT  
TACTTTGCTCTTCGTTTCTT

In100 candidate527 (in intron):

LOCUS ENSG00000189212

DESCRIPTION DPY19L2P1 protein. [Source:Uniprot/SPTREMBL;Acc:Q6NXN4]

ATGGCTATATACCTACAAAATATGCATTATGCCAATATATGTAATAACCATAAAAATGTATTTTTTTCTTTTTTTTCAGAT  
TTCAGTTACCCTTAGTTTCA

In100 candidate528 (in intron):

LOCUS ENSG00000054611

DESCRIPTION TBC1 domain family member 22A.

[Source:Uniprot/SWISSPROT;Acc:Q8UA7]



AGTTCTAACAAGACGGTGCCCATTTCTCTTTCTAATTTATTCACCTTGTTTGCTCACTCATGAATTCAGTCATTTGCTCAT  
TGATTTGTTCACTCATTTAC

In100 candidate529 (in intron):

LOCUS ENSG00000138594

DESCRIPTION Tropomodulin-3 (Ubiquitous tropomodulin) (U-Tmod).

[Source:Unipot/SWISSPROT;Acc:Q9NYL9]

AACATTTCTGGATAACTACACCCACTCTGGATAGTTCCTTTCCTCCAGCATTTCTCCATATGATTTACATACCGTAAAG  
TACTGCCTTTTTTTTTTTTTTTT

In100 candidate530 (in intron):

LOCUS ENSG00000053900

DESCRIPTION Anaphase-promoting complex subunit 4 (APC4) (Cyclosome subunit ).

[Source:Uniprot/SWISSPROT;Acc:Q9UJX5]

AAATGAAGGCTGAATTTATTGATTTTGTGTAAATTGATGGGAATATAACTTTCCTATAAAACCATTCTTTGATTCAGAC  
TTCTGATTTCTAATTCTTTA

In100 candidate531 (in intron):

LOCUS ENSG00000119682

DESCRIPTION K0317\_HUMAN Isoform 2 of O15033 - Homo sapiens (Human)

[Source:niprot/Varsplic;Acc:O15033-2]

CTCTGTGAAACATCCCATTCATCTCTTTAATCTCATAACCAAACTGAGTTCTAATTCTGTTCTACTTCAGAACACTTT  
GCTGTGTACCATTCTTCATT

In100 candidate532 (in intron):

LOCUS ENSG00000042980

DESCRIPTION ADAM 28 precursor (EC 3.4.24.-) (A disintegrin and

metalloprotenase domain 28) (Metalloproteinase-like, disintegrin-like, and cysteine- rich protein-L) (MDC-L) (eMDC II) (ADAM23).

[Source:Uniprot/SWISSPROT;Acc:Q9UK2]

TTTCATTCCTTGGTAACTACGTGGAAAGAGCTTTGCTTTTGAGACATTTTATCGTTTTGGCTTTCCTCTACCTCAGGAG  
TGCTACTCCTCATTTTCATTT

In100 candidate533 (in intron):

LOCUS ENSG00000119596

DESCRIPTION YLP motif-containing protein 1 (Nuclear protein ZAP3)  
(ZAP113).[Source:Uniprot/SWISSPROT;Acc:P49750]

TTAAGAATCTCTCTGAGGATAACAATTTGAGTTGAAAGTTCTTTTCTGCTTTTGCATTCTGTTTTCTCCAAATTCAGAT  
CCTATTTATTTATCTTTAGT

In100 candidate534 (in intron):

LOCUS ENSG00000069206

DESCRIPTION ADAM 7 precursor (A disintegrin and metalloproteinase domain  
7)(Sperm maturation-related glycoprotein GP-83).

[Source:Uniprot/SWISSPROT;Ac:Q9H2U9]

TACACTTCTTATTGACTAGTTACATTGCCTAGTAACATTGTATGAATGATCTTCCATTTCTGTTTCATTCAGTGTTGATA  
GTTTATCATTCACCTTCCTTT

In100 candidate535 (in intron):

LOCUS ENSG00000091490

DESCRIPTION

GCTGAGATTAACTGTCATCATTATGGGTATTTACTTTCCCTCCATCTGTGTCTTTTTTGGTTCTCTTCTTTGTCAGACCC  
CTTTCTTTCTCTTTCTTGGT

In100 candidate536 (in intron):

LOCUS ENSG00000164236

DESCRIPTION

CGCGCTGAACACAATGAATGGACGCGTGTCAATTCACCATTATTAAGTGAAGTCCGTTCTTTATTCGGATTTCTCAGCG  
TTTCCCGGATTTCTTTTTC

In100 candidate537 (in intron):

LOCUS ENSG00000112977

DESCRIPTION Death-associated protein 1 (DAP-1).

[Source:Uniprot/SWISSPROT;Ac:P51397]

AGCCTTCCCTAGCCATTTTTGGTTATCTGTGACTTCTAACGTCTTTGTGAGTGTCTTTTCATTTTCGGCCAGTGCCCTGT  
GCATTCTTACTTGGTTTTGT

In100 candidate538 (in intron):

LOCUS ENSG00000164542

DESCRIPTION

TGCCTCTCCGAATAACCTAGTATTCTCCTAACATCACAATACTTTCTTTTTTTTTTTTTCTTTTCACTATGCTCCAGCT  
TCAGGCCTTTTTTCTGGTCA

In100 candidate539 (in intron):

LOCUS ENSG00000197535

DESCRIPTION Myosin-Va (Dilute myosin heavy chain, non-muscle) (Myosin-12)  
(yosin heavy chain 12) (Myoxin). [Source:Uniprot/SWISSPROT;Acc:Q9Y4I1]  
TGGAATGCTCTGCTCGTCCTCTTAACTTGCTTATCTCCCATTCATTTTGGCTTCTTTCAGTTTCAACTCCCCTACTAAT  
TGCCTCATTATTTTCTTGTT

In100 candidate540 (in intron):

LOCUS ENSG00000197535

DESCRIPTION Myosin-Va (Dilute myosin heavy chain, non-muscle) (Myosin-12)  
(yosin heavy chain 12) (Myoxin). [Source:Uniprot/SWISSPROT;Acc:Q9Y4I1]  
AGAACTTGTATAACAAGTGAGGAAATTGTCTTTTTTCCTTGTCAGATTCTAAACCCTGGCATGGAGTCTGACTGTTTTCTT  
TTCTTTTTTTTTGCCTTGTTT

In100 candidate541 (in intron):

LOCUS ENSG00000121390

DESCRIPTION paraspeckle protein 1 [Source:RefSeq\_peptide;Acc:NP\_001035879]  
EXON  
CTCTGGAAAGATGTGGTGATGGGGCATTCTTGCTAACAACGTAAGTTTAAATATCTTGTCCTTCTTCTATCCAGTTACA  
TATGGGCTTCTCTCTGTTTT

In100 candidate542 (in intron):

LOCUS ENSG00000121390

DESCRIPTION paraspeckle protein 1 [Source:RefSeq\_peptide;Acc:NP\_001035879]

EXON

TTCCGATAACTTCTGATGTTGAGTACCCTTTATATACTGCTTTTTTTTTTTTTTTTTTTTGCCATTCAGCCACCTGCTTT  
GTAAAGTACTCCTGCTTTTT

In100 candidate543 (in intron):

LOCUS ENSG00000169862

DESCRIPTION Catenin delta-2 (Delta-catenin) (Neural plakophilin-related  
ARMrepeat protein) (NPRAP) (Neurojungin) (GT24).

[Source:Uniprot/SWISSPROT;AccQ9UQB3]

AAAGAAGGTGCTGTCTAACTCCGAAGAGATTTTGTCTTTTTTTTGGCAGTTTCTCTCAAGATCTTTGATGCTTACACAAC  
TGTCCATTGCCTTTCCTTTT

In100 candidate544 (in intron):

LOCUS ENSG00000169862

DESCRIPTION Catenin delta-2 (Delta-catenin) (Neural plakophilin-related  
ARMrepeat protein) (NPRAP) (Neurojungin) (GT24).

[Source:Uniprot/SWISSPROT;AccQ9UQB3]

AAAATATTTGTCATTTTATTTATCTTTTGAAAATAACTCAACTTTTTGTTTCATTGATATTTTATATTTTGTCTCAGTT  
TCATTTATTTCTGCTCCGAC

In100 candidate545 (in intron):

LOCUS ENSG00000169862

DESCRIPTION Catenin delta-2 (Delta-catenin) (Neural plakophilin-related  
ARMrepeat protein) (NPRAP) (Neurojungin) (GT24).

[Source:Uniprot/SWISSPROT;AccQ9UQB3]

AAATATTCTCCTGCTTTCAAGCTTCTCTTATGTGATCCGCTCTTTAACCCTCCTACTTTCCTTTTTTTCATTATTCAGTT  
TTTTTGCCTTTTTTTGCCCTT

In100 candidate546 (in intron):

LOCUS ENSG00000169862

DESCRIPTION Catenin delta-2 (Delta-catenin) (Neural plakophilin-related  
ARMrepeat protein) (NPRAP) (Neurojungin) (GT24).

[Source:Uniprot/SWISSPROT;AccQ9UQB3]

ATTCTCTCCCCTGTTTCATCCTCCTCCCCTCCCTAGTCTCTGGTAACCACTATTCTACTCTCTGCTTCTATGATATCAGCT  
TCTTTTTTTAGATTCCATGTT

In100 candidate547 (in intron):

LOCUS ENSG00000155849

DESCRIPTION Engulfment and cell motility protein 1 (CED-12 homolog).

[Source:Uniprot/SWISSPROT;Acc:Q92556]

CTTCCAACATAACAAGACTAGATTTCTAGTAGAGTGAATGTCTGTGCCTTTTTCTTCCTCTTTCTCTTCTCTTCTTCAGTG  
TCATCATCTTCTTGTTCTTC

In100 candidate548 (in intron):

LOCUS ENSG00000147459

DESCRIPTION Deducator of cytokinesis protein 5.

[Source:Uniprot/SWISSPROT;Ac:Q9H7D0]

AGTCTGTCCCTAACTGGGACCAAGCTACCTATATCACTTTATTTCTACAGTTCATTTTTCAGTCCCCCCCATTGTTGGGT  
ATTTAGCTTGTTTGCTGCTT

In100 candidate549 (in intron):

LOCUS ENSG00000147459

DESCRIPTION Dedicator of cytokinesis protein 5.

[Source:Uniprot/SWISSPROT;Ac:Q9H7D0]

GCAAGTCTCCCTTTAATTTTTCATTTTCAAGCTATTTTAAACTATTTTAACTTTTTCACATGTTTATTCTTCCAGAT  
ATATTTTATTACCATTTTGT

In100 candidate550 (in intron):

LOCUS ENSG00000147459

DESCRIPTION Dedicator of cytokinesis protein 5.

[Source:Uniprot/SWISSPROT;Ac:Q9H7D0]

AGATAACCATTATTAAGAGTTGGCACATTTTCTTTCTTGTTTCTTTTTTTAGATGTGTACAGATCAATGTTTGTTTTTT  
TGTTTTTTTGTTTTTTTTTTT

In100 candidate551 (in exon):

LOCUS ENSG00000128989

DESCRIPTION cAMP-regulated phosphoprotein 19 (ARPP-19).

[Source:Uniprot/SWISPROT;Acc:P56211]

TGTATATGGAAGCATAGGTGTCTATATCCTTACTCTTTTATATAACACAATAATGGCGTTTTCTTCTAATTTCTCAGTT  
GTAACTTCTTTCTCTTTTT

In100 candidate552 (in intron):

LOCUS ENSG00000073146

DESCRIPTION Putative helicase Mov10l1 (EC 3.6.1.-) (Moloney leukemia virus 0-

like protein 1) (MOV10-like 1). [Source:Uniprot/SWISSPROT;Acc:Q9BXT6]  
AGGCTATGAACATGGAATGTGTTAACATTTATTTATGTCTTCTTTAATTTCTTACAGCAGTGTTTTGTCATTTTCTCTGT  
ATATGTTTTTCACTTCTTTG

In100 candidate553 (in intron):

LOCUS ENSG00000109680

DESCRIPTION TBC1 domain family member 19.

[Source:Uniprot/SWISSPROT;Acc:Q8NT2]

TTTGACTACTTCAAGAGAAAATCATGTAATTTCTGTGTTAACCATTATCTAGTCTCAATTCATTTGTTTAACTTCCAGTG  
GATTCTTTTTTGCTGTCTGCC

In100 candidate554 (in intron):

LOCUS ENSG00000109680

DESCRIPTION TBC1 domain family member 19.

[Source:Uniprot/SWISSPROT;Acc:Q8NT2]

TTTAACCTCATTGACTATTCCCTTTATTGACATATTCCTTTGCTTTTGTGACACAGTGCTCTTTCTGGCATTCTTCATTTG  
TGGAGGGTCTTCTTTGTCTT

In100 candidate555 (in intron):

LOCUS ENSG00000109680



DESCRIPTION TBC1 domain family member 19.

[Source:Uniprot/SWISSPROT;Acc:Q8NT2]

ATCGGTTGGCTTGATGGTGTCCATAAGTTCCTATGGCTCTGTAACTTCAATTTTTTTCCTTCTGTTTCACAGCCTC  
AATTATTTCCATTTCCCTAT

In100 candidate556 (in intron):

LOCUS ENSG00000166415

DESCRIPTION WD repeat protein 72. [Source:Uniprot/SWISSPROT;Acc:Q3MJ13]

TAGAAGGATGTTTAACTACTAATTCAATTTCTTTACTTGGTATAGGTCTGTTCCACTTTCTATTTCTTCTTATGCCAGTT  
TTGGTCGTTTATGTCTTTTT

In100 candidate557 (in intron):

LOCUS ENSG00000166415

DESCRIPTION WD repeat protein 72. [Source:Uniprot/SWISSPROT;Acc:Q3MJ13]

TTCAACTCTTGGCTACCATATTGAGCTAGTAACTTTGAATTCAAATCTTTGAGTTCTTTTTCACTGCTTATTTACAGGC  
CTGAGCTATCTTTTAGTCTT

In100 candidate558 (in intron):

LOCUS ENSG00000130038

DESCRIPTION EF-hand calcium binding domain 4B

[Source:RefSeq\_peptide;Acc:NP116069]

TAAAAATCACCCATAAACCCAATAACAAGATAACCACCATTGATATTGTGGTACATTCCTTCTAGTCTTTTTTCAGTG  
TACATGTCTTTTCTTATTGC

In100 candidate559 (in intron):

LOCUS ENSG00000130038

DESCRIPTION EF-hand calcium binding domain 4B

[Source:RefSeq\_peptide;Acc:NP116069]

AGTCACTCTAAAAATTATTAACGAGATCTTTTACATTCCTTTCTTTTGAAGTCAGTCTTTGAAATCTCTTTTGCTCTTAC  
ATCTCACTTTAGACTGTCCA

In100 candidate560 (in intron):

LOCUS ENSG00000137766

DESCRIPTION Unc-13 homolog C (Munc13-3) (Fragment).

[Source:Uniprot/SWISSPRT;Acc:Q8NB66]

TATAGATTGGGAATTTTAGTAGATACCAACAAATTAACCTCCAAAGGGGTTTTATTAATTTTCAGTCCCTCCGGCAATCT  
CTAAAAGTGTTTTTTTTTTC

In100 candidate561 (in intron):

LOCUS ENSG00000137766

DESCRIPTION Unc-13 homolog C (Munc13-3) (Fragment).

[Source:Uniprot/SWISSPRT;Acc:Q8NB66]

TGTGGTTTGGGATTTTCTATAGTCATAACATTTACGTCCTTTCTCTTCCTAATTTTTTTGTGTGTGCTCTACCAGTGGGT  
TTTATCCTTTTGTGCATTTT

In100 candidate562 (in intron):

LOCUS ENSG00000169851

DESCRIPTION Protocadherin-7 precursor (Brain-heart protocadherin) (BH-Pcdh)

[Source:Uniprot/SWISSPROT;Acc:O60245]

ACCCACCTCCCTCCCACCACACTGCCTTAGGATGTTTTAACTTCCCTTTCATAAACTTTTTTTTTCTTTTCTGCAGCA  
ACTCTTTTTTTTGCTGCCATT

In100 candidate563 (in intron):

LOCUS ENSG00000169851

DESCRIPTION Protocadherin-7 precursor (Brain-heart protocadherin) (BH-Pcdh)

[Source:Uniprot/SWISSPROT;Acc:O60245]

TCCCTTCAAAAAGTAATTTAAAGGAGAAAGTTCCCCTTAAGCTAACATAGTTCTTATTTCTTCTATTTTCAACTTCAGTT  
CTTTTTTTTCCACTGTGTTC

In100 candidate564 (in intron):

LOCUS ENSG00000047621

DESCRIPTION Uncharacterized protein C12orf4.

[Source:Uniprot/SWISSPROT;Acc:9NQ89]

TTGCCTTCCTAGAAAATTATAACTACACTATTCCTCACGAATTTTCTTTTTTACTGTCACCTTATCCAGTTTATTGTGAT  
ATATCTGTTGCTGTCCTTTC

In100 candidate565 (in intron):

LOCUS ENSG00000047365

DESCRIPTION Centaurin-delta 1 (Cnt-d1) (Arf-GAP, Rho-GAP, ankyrin repeat an  
pleckstrin homology domain-containing protein 2) (PARX protein).

[Source:Uiprot/SWISSPROT;Acc:Q8WZ64]

GTGATCCTCTGACTGCTATTAAGCCCATTTTCTCACAAAGTTTCTAACTTTGCTAAGGATGTGTTTCTGATTTTTCAGTG  
GTATGCTCTCTTTTTGTTTT

In100 candidate566 (in intron):

LOCUS ENSG00000047365

DESCRIPTION Centaurin-delta 1 (Cnt-d1) (Arf-GAP, Rho-GAP, ankyrin repeat and pleckstrin homology domain-containing protein 2) (PARX protein).

[Source:Uniprot/SWISSPROT;Acc:Q8WZ64]

AAAAACATGTGCACAAGAGACTGGCTGCTAACTTTTGTAGAGGCTTTTCTTCTTCTTTTGTAACTTATTAAAATTCAGAT  
ATTCAACTTTTTTTTTTTTTTTT

In100 candidate567 (in intron):

LOCUS ENSG00000006715

DESCRIPTION Vacuolar protein sorting-associated protein 41 homolog (S53).

[Source:Uniprot/SWISSPROT;Acc:P49754]

TACTTTTTCAATCCCACTCTCTTCCCTGTGGAAGTGAATAACATGAATGTTGGCCCTTTTATTATTTTTTTTCACAGGT  
CCCTGAGACTCTTCATTTTTT

In100 candidate568 (in intron):

LOCUS ENSG00000119685

DESCRIPTION Tubulin--tyrosine ligase-like protein 5 (SRC1 and TIF2-associated modulatory protein). [Source:Uniprot/SWISSPROT;Acc:Q6EMB2]

GCTGCTAGTTTACACACAACCATTTATATGTCTGCTTTTAACATTGTCTGAGTGTGTTCTGCGTTTCTTCTTATCAGGT  
TTGATTGCTTTAATCCCATC

In100 candidate569 (in intron):

LOCUS ENSG00000119685

DESCRIPTION Tubulin--tyrosine ligase-like protein 5 (SRC1 and TIF2-associated modulatory protein). [Source:Uniprot/SWISSPROT;Acc:Q6EMB2]

AACTTTGGTTATATGTTTCATAACATTTGAGGTTTGAGCCTTCTTTATTTGTCCCATTTTCCAGATAGGAATTTTTTCTTT  
TTACTGTATTCTTTTTTTCT

In100 candidate570 (in intron):

LOCUS ENSG00000106536

DESCRIPTION POU domain, class 6, transcription factor 2 (Retina-derived POUdomain factor 1) (RPF-1). [Source:Uniprot/SWISSPROT;Acc:P78424]

CATTTTAAGGTTCCATGTGAATGTGAATATGTAACAAAACACCTACTCTATATTTCTATCCATCAGTATTTTATTTACCC  
ACCAGCCTTCATTTCTCTTT

In100 candidate571 (in intron):

LOCUS ENSG00000106536

DESCRIPTION POU domain, class 6, transcription factor 2 (Retina-derived POUdomain factor 1) (RPF-1). [Source:Uniprot/SWISSPROT;Acc:P78424]

AACCATATCTTTTTTCTTAACAACTTCCATTTTTTTTCACTCTCCCATTAATCTCAGCTTCTTTAAACCTTCAAAA  
CTTATTTATTTATTTATTTT

In100 candidate572 (in intron):

LOCUS ENSG00000106536

DESCRIPTION POU domain, class 6, transcription factor 2 (Retina-derived POUdomain factor 1) (RPF-1). [Source:Uniprot/SWISSPROT;Acc:P78424]

AAACTTCTAAGTTGGAGTAGAATAGTAAATCCTTTAACCCTCTGAAATATGACTCAATTTCTTTTCTTCCAGAATAG

CCCTTCTTACAATTCCTTT

In100 candidate573 (in intron):

LOCUS ENSG00000166450

DESCRIPTION protogenin [Source:RefSeq\_peptide;Acc:NP\_776175]

ACTTTAACTGTATTAGGTATGTTCCCTTTCATTCTGCAATCAGGGGAATCTTACATTTTAACATTTGCCGTTTTATCTCAT  
TCATAGCTTACTTCTTTCTT

In100 candidate574 (in intron):

LOCUS ENSG00000154274

DESCRIPTION C4orf19 protein. [Source:Uniprot/SPTREMBL;Acc:Q8IY42]

AGTCTTGGTTAAATAGTAACTAGTACCTATGTCCTGCTTTTCTTTCTTGGTCATTAGGCAGATTTTCTTTTTGGTCATTC  
TTTTTGGTCATTAGATTACA

In100 candidate575 (in intron):

LOCUS ENSG00000154274

DESCRIPTION C4orf19 protein. [Source:Uniprot/SPTREMBL;Acc:Q8IY42]

AGGTGTGCGCCACCACTGAATTTTTTAACAATCATCTTTAAATTTTTCTTTTACCTCCATAGTTTCTGGTCCCTCCAGAT  
TGTTTTTGGCTTTCCCCGGC

In100 candidate576 (in intron):

LOCUS ENSG00000069869

DESCRIPTION E3 ubiquitin-protein ligase NEDD4 (EC 6.3.2.-).

[Source:UniprotSWISSPROT;Acc:P46934]

TGATCTTATTACTTTAATAACTTTATTTTTGCATATTCCTTCTAATCTTTCTGTGTGTGCTTTTACAGTTGTCATAGAT  
TTCAGCATTCTTATTTTTTC

In100 candidate577 (in intron):

LOCUS ENSG00000065883

DESCRIPTION Cell division cycle 2-like protein kinase 5 (EC 2.7.11.22)

(CDCrelated

protein kinase 5) (Cholinesterase-related cell division controlle).

[Source:Uniprot/SWISSPROT;Acc:Q14004]

TTTATTGAGGCATTTAGAAGTCGCCTAACATCTTCTTGGCCTGTACTCTTTTTTTTTTTTTTTTAATTAAAAGCAGTT  
CTTTTACCAACTTTTAATTT

In100 candidate578 (in intron):

LOCUS ENSG00000120907

DESCRIPTION Alpha-1A adrenergic receptor (Alpha 1A-adrenoceptor) (Alpha

1Aadrenoreceptor)

(Alpha-1C adrenergic receptor) (Alpha adrenergic receptor 1).

[Source:Uniprot/SWISSPROT;Acc:P35348]

TTCTTCACTTTTTTTATTTTAATTTTTTTACTTTTTCTTCTCTGGATAACTTCAAATTACTGGCCTTTTTATTACAGAT  
TCTTTCTTCTCCTTGATCAA

In100 candidate579 (in intron):

LOCUS ENSG00000134115

DESCRIPTION Contactin-6 precursor (Neural recognition molecule NB-3) (hNB-3.

[Source:Uniprot/SWISSPROT;Acc:Q9UQ52]

AGTATTTAGTCTGTATCTCAAATAACTCTTCAATCTGCCTCGTCCTTTTGATCCTTTTAGGTCAGTCCTTCATTATCTCC  
TGTTAGAAGTCTCCTAATTT

In100 candidate580 (in intron):

LOCUS ENSG00000134115

DESCRIPTION Contactin-6 precursor (Neural recognition molecule NB-3) (hNB-3.

[Source:Uniprot/SWISSPROT;Acc:Q9UQ52]

CATTTCTTGTCAACTTTTTCTTAAGAAGAATAACTTGACTTCTCTAAATACTCCTTTATTTCTCTCAGGGCATATGCAT  
TTACTTACCCTATACTCTTT

In100 candidate581 (in intron):

LOCUS ENSG00000175600

DESCRIPTION Uncharacterized protein C7orf10 (Dermal papilla-derived  
protein13). [Source:Uniprot/SWISSPROT;Acc:Q9HAC7]

AATAGCTGTAACAATTTACCACATTAAACATTGTTTTAGCTACTTCCCTTTTTCTGATGCTTTGCCTATCAGTTTACCTT  
CTGATTATAATTTGGTTTTTC

In100 candidate582 (in intron):

LOCUS ENSG00000175600

DESCRIPTION Uncharacterized protein C7orf10 (Dermal papilla-derived  
protein13). [Source:Uniprot/SWISSPROT;Acc:Q9HAC7]



TGTAAGCCTTCTTAAGAACTCTTTGTAGGTTGATAACATTATGCCCAACTCATATTTGTTTTGACTAGTCTTTCTCAGTT  
TGTGTTTTTAATTTTATTTCT

In100 candidate583 (in intron):

LOCUS ENSG00000175600

DESCRIPTION Uncharacterized protein C7orf10 (Dermal papilla-derived  
protein13). [Source:Uniprot/SWISSPROT;Acc:Q9HAC7]

GCAAATCTGCTATTGAGTCCTGGTGATTTTAACATTTCTGTTATTGTACTTTTCAACTCCAGATACTCTGTTTCAGTGAGG  
CACCTTTCTCATACCTTTTT

In100 candidate584 (in intron):

LOCUS ENSG00000176788

DESCRIPTION Brain acid soluble protein 1 (BASP1 protein) (Neuronal axonal  
mmbrane protein NAP-22) (22 kDa neuronal tissue-enriched acidic protein).  
[Surce:Uniprot/SWISSPROT;Acc:P80723]

AGAATGAAATAGTGTGTTTTTCTTCTGCACCCTAAGGATTTAAATAACATAAAAAATTATTTCTTAATGTTTTACAGACT  
TTCCATACTCAGTACATTTT

In100 candidate585 (in intron):

LOCUS ENSG00000110799

DESCRIPTION von Willebrand factor precursor (vWF) [Contains: von  
Willebrandantigen 2 (von Willebrand antigen II)].  
[Source:Uniprot/SWISSPROT;Acc:P0427]

AGCAATGCCTGGCAAACATTTTCCTTCTGCATGAGAAGTAACTCCCCTTGGCATGTGCCAATGCTTCTCTTTCAGCCCCA  
GTCTTAGGATTTGTTCTCTT

In100 candidate586 (in intron):

LOCUS ENSG00000106571

DESCRIPTION Zinc finger protein GLI3.

[Source:Uniprot/SWISSPROT;Acc:P10071]EXON

CTTTGTGCGTTTTCAAAGCCCTGCTGCTTCTTGCATGTCTAACTGGCATTTTTATAACTCTGTTCTAGTATTCTCAGTG  
TATTCTTCTTTTGTTTCTCG

In100 candidate587 (in intron):

LOCUS ENSG00000106571

DESCRIPTION Zinc finger protein GLI3.

[Source:Uniprot/SWISSPROT;Acc:P10071]EXON

TAACACACAAAATCACTTCATGAACATTCACTTCTCTTGTTTCTCTTTACTTTTTCTTTCCTCTTGCTCTCTGCCCAGGT  
CTCTTGACTTTTTACAGCAT

In100 candidate588 (in intron):

LOCUS ENSG00000145526

DESCRIPTION Cadherin-18 precursor (Cadherin-14).

[Source:Uniprot/SWISSPROT;cc:Q13634]

TGGAATATACAATTATGTGGATAGCTGATATAACATTGAATGTGATAAACCTTTCTCTTTCTTATCCAGATTTATGAGCT  
CTTAATCTTCTCTCAGGCCT

In100 candidate589 (in intron):

LOCUS ENSG00000145526

DESCRIPTION Cadherin-18 precursor (Cadherin-14).

[Source:Uniprot/SWISSPROT;cc:Q13634]

AGTATTTAATAACTTTTCTATATTTCTAATTTATTTTCAGGACTGTTTAGTTCTCCTTTTATTGTTCTCATTCTGTTCCAT  
TAATAGGTCTTAAGTTTACC

In100 candidate590 (in intron):

LOCUS ENSG00000145526

DESCRIPTION Cadherin-18 precursor (Cadherin-14).

[Source:Uniprot/SWISSPROT;cc:Q13634]

GTATTAATGTATAAAGTATATACTTACATTTCTAACATATTTAACACTTTGTTTGCTTCTCTCTGCTTCTATATCCAGTT  
TCTTCTTCCTGGCTTCAATT

In100 candidate591 (in intron):

LOCUS ENSG00000145526

DESCRIPTION Cadherin-18 precursor (Cadherin-14).

[Source:Uniprot/SWISSPROT;cc:Q13634]

TCATTAAGATGAAAGGCTTTCAATTTTTCTTCTTGTGACCCTAACAAAGTGTTTTTTATTCAC TTATTCCAGAAATATTA  
AACTTTCCTTCTCATATTTT

In100 candidate592 (in intron):

LOCUS ENSG00000145526

DESCRIPTION Cadherin-18 precursor (Cadherin-14).

[Source:Uniprot/SWISSPROT;cc:Q13634]

TGGTCCTGGACTTTTTTTTGTGTTGGTAACTTTTAAATTACCCTGTCAATCTCACTGCTTGTTATTTGTCTGTTTCAGAG  
TTTATATTTTTTTTCCTTGTT

In100 candidate593 (in intron):

LOCUS ENSG00000154162

DESCRIPTION Cadherin-12 precursor (Brain-cadherin) (BR-cadherin) (N-cadherin 2) (Neural type cadherin 2). [Source:Uniprot/SWISSPROT;Acc:P55289]

TTTCAAACCTAGAACATAATTAATTTTTCTTCTAATGCTATAACCCACTTAATTTCTTCTTTCTCTTTCAAGTAGCAGTT  
TACATGTATTTTCCCCTTAG

In100 candidate594 (in intron):

LOCUS ENSG00000154162

DESCRIPTION Cadherin-12 precursor (Brain-cadherin) (BR-cadherin) (N-cadherin 2) (Neural type cadherin 2). [Source:Uniprot/SWISSPROT;Acc:P55289]

CCTTGGACCATTTCTTTCCTTGCCTTCTGAGTAACCACACTTGCCTATCTTTTACCTCACTTCTTATTGTTTCTCAGTTT  
TCATTACTGCCACGTCTTAT

In100 candidate595 (in intron):

LOCUS ENSG00000154162

DESCRIPTION Cadherin-12 precursor (Brain-cadherin) (BR-cadherin) (N-cadherin 2) (Neural type cadherin 2). [Source:Uniprot/SWISSPROT;Acc:P55289]

AAAAATATTCTAAAATAAATGTTTATTAGAAAAGATAGTTAACATTCTGACTGTATATGTTTGTCTTTCCAGCTTTGTTA  
CCTAACAGCTTGGCTCTTTT

In100 candidate596 (in intron):

LOCUS ENSG00000154162

DESCRIPTION Cadherin-12 precursor (Brain-cadherin) (BR-cadherin) (N-cadherin 2) (Neural type cadherin 2). [Source:Uniprot/SWISSPROT;Acc:P55289]

TTTGAAAGTTCTCCGTTATTATCTTTTGAATAAACTTTCTAACCCTGTCTTTTTTCTCTATCTCCTTTTTAAGGTCAGTA  
ATTCTTAGATTTGCCCTTTT

In100 candidate597 (in intron):

LOCUS ENSG00000154162

DESCRIPTION Cadherin-12 precursor (Brain-cadherin) (BR-cadherin) (N-cadherin 2) (Neural type cadherin 2). [Source:Uniprot/SWISSPROT;Acc:P55289]

TAACCATAACAAAGTTTGTGTGTCTTATGTATGTTGCTGTCTGTCCTCTACTTCTCTATTCTCTTACGGTCAACCAGCT  
TCATTTGTTTCTGTGATCTG

In100 candidate598 (in intron):

LOCUS ENSG00000154162

DESCRIPTION Cadherin-12 precursor (Brain-cadherin) (BR-cadherin) (N-cadherin 2) (Neural type cadherin 2). [Source:Uniprot/SWISSPROT;Acc:P55289]

TAGGTTTACTGTTTTTAAAATGTAATGTTATTCAAGGAATAACAAATTTTTCTTTTTTTTCAACTTTCATGTCCCAGAT  
CATCCTTTCTTCCTTTTTTTT

In100 candidate599 (in intron):

LOCUS ENSG00000154162

DESCRIPTION Cadherin-12 precursor (Brain-cadherin) (BR-cadherin) (N-cadherin 2) (Neural type cadherin 2). [Source:Uniprot/SWISSPROT;Acc:P55289]

CATATTTCTTTCAAATCTGCAATATAACTTACCTATCCATTATACTTATGACTTATTTGCTACTTTCTTCTTCAGGGTCA

GATTTTCTTCTGTTTAGTTT

In100 candidate600 (in intron):

LOCUS ENSG00000104228

DESCRIPTION Tripartite motif-containing protein 35 (Hemopoietic lineage switch protein 5). [Source:Uniprot/SWISSPROT;Acc:Q9UPQ4]

GTCATGGAATTGTATTTTGTCTTTAACTTTATGATAGTCTCTTGCCATACACACCTCTTATTTTCTGTGTATTCAGTT  
ATCTCATTCTTTCTTCAAGG

In100 candidate601 (in intron):

LOCUS ENSG00000072756

DESCRIPTION tRNA-nucleotidyltransferase 1, mitochondrial precursor (EC 2.7..25) (Mitochondrial tRNA nucleotidyl transferase, CCA-adding) (mt tRNA adenyltransferase) (mt tRNA CCA-pyrophosphorylase) (mt tRNA CCAdiphosphorylase) (mt CCA-adding enzyme). [Source:Uniprot/SWISSPROT;Acc:Q96Q11]

TGTTTTTAATTTCAAGATGATATAACTTGTTTTGGATTTTCACTTACTGTGCAGGGCACTTAGTGGGCCCTCATGTTTC  
TTTCATAATTTTCATCCCTTT

In100 candidate602 (in intron):

LOCUS ENSG00000140650

DESCRIPTION Phosphomannomutase 2 (EC 5.4.2.8) (PMM 2).  
[Source:Uniprot/SWISPROT;Acc:O15305]

TACTGAAAATCAACCTTGGCAACCCACTAACTGACAAAAGAGTAAATTGTTTTTTTCAGTGACATATCATTAGCCCCCTTT  
TTCACCTTTTGCCTTTGTGT

In100 candidate603 (in intron):

LOCUS ENSG00000150457

DESCRIPTION Serine/threonine-protein kinase LATS2 (EC 2.7.11.1) (Large tumor suppressor homolog 2) (Serine/threonine-protein kinase kpm) (Kinase phosphorylated during mitosis protein) (Warts-like kinase).

[Source:Uniprot/SWISSPOT;Acc:Q9NRM7]

GTGATGGGGGAGAGGACATCCCTGCATCCTGGCTTTAACATGGAACCTTCTCATGGTTCTTTTTCTTCAGTCTGCAGTGT  
CTCTTGTGGCTCTTGTCTT

In100 candidate604 (in intron):

LOCUS ENSG00000144455

DESCRIPTION Sulfatase-modifying factor 1 precursor (C-alpha-formylglycine-generating

enzyme 1). [Source:Uniprot/SWISSPROT;Acc:Q8NBK3]

TGAATTTATTTAACTGAATTTATTTACTCTTCTTATTTCTACTACCAAACCTTTGATATCGTTCCCTCTTTGTATACAGTT  
ATTTCCCCTTCTATTTATAA

In100 candidate605 (in intron):

LOCUS ENSG00000035928

DESCRIPTION Replication factor C subunit 1 (Replication factor C large subunit) (RF-C 140 kDa subunit) (Activator 1 140 kDa subunit) (Activator 1 large subunit) (A1 140 kDa subunit) (DNA-binding protein PO-GA).

[Source:Uniprot/SWISSPROT;Acc:P35251]

CCGTATTGTTAACTAACCTGTACATATTTTTCGAACCTTACATTTTCCCTGTAGTTCTTCTGTTCCAGGGTCCCACACT  
GCATTTAGTTGTGTCTTCTT

In100 candidate606 (in exon):

LOCUS ENSG00000113361

DESCRIPTION Cadherin-6 precursor (Kidney-cadherin) (K-cadherin).

[Source:Unprot/SWISSPROT;Acc:P55285]

TGAATGGTTTCCGATTTTATAATGGACTGCCCTATATAGTAACAAGTATTTTCATGCTTGAGCTATTTCTGCTTTCAGGG  
TTTCTTTTTTCTAGTTCTTC

In100 candidate607 (in intron):

LOCUS ENSG00000137845

DESCRIPTION ADAM 10 precursor (EC 3.4.24.81) (A disintegrin and  
metalloprotease domain 10) (Mammalian disintegrin-metalloprotease) (Kuzbanian  
protein homolog) (CD156c antigen) (CDw156). [Source:Uniprot/SWISSPROT;Acc:O14672]

ATCATTGTGGTTTGGTGGTTTTCTTTAGTGGTAACATTTGACTTCTTTTTCTCATTTGTGTATCTGCTCTACCAGTTAGC  
TTTATATTTCTGTGTGTTTT

In100 candidate608 (in intron):

LOCUS ENSG00000150995

DESCRIPTION Inositol 1,4,5-trisphosphate receptor type 1 (Type 1 inositol  
1,4,5- trisphosphate receptor) (Type 1 InsP3 receptor) (IP3 receptor isoform )  
(InsP3R1) (IP3R). [Source:Uniprot/SWISSPROT;Acc:Q14643]



TTGTGTGTAGAGTAATAACCTTTTAATGCAATGGGCTACTCTTTTATTTTCCCAGGCTATGGTGATTTTTTTTCAACTTT  
GTTTATGATGGTTCTTTTTT

In100 candidate609 (in intron):

LOCUS ENSG00000166669

DESCRIPTION activating transcription factor 7 interacting protein 2

[SourceRefSeq\_peptide;Acc:NP\_079273]

CATGGTTGTTTTAATGCTCTTGTTTTAACTCAAGTGTTGGATCACCTGTGCATCTGTTTCTATTGTTTTTCTGTCAGTC  
TCTGGTTTTTTTTTTGGCAT

In100 candidate610 (in intron):

LOCUS ENSG00000021645

DESCRIPTION neurexin 3 isoform alpha precursor

[Source:RefSeq\_peptide;Acc:N\_004787]

CTGGCTTGTCGAATAGGCTCTAACCATATTGACTTTTTTTTTTTTTTAATCAGGCCTCATATGAACCCATTTCTTTCAGTC  
ATAGAGTCTTTTTTGTTTTT

In100 candidate611 (in intron):

LOCUS ENSG00000021645

DESCRIPTION neurexin 3 isoform alpha precursor

[Source:RefSeq\_peptide;Acc:N\_004787]

TTTCTCCTCCCTATTTTCTTCTTCTAAATATGTCTTTTAACTCTGCATCTTGTTCTTGCAATTCCTTCATCAGAAT  
TTTCTTCCCTTCCTTTTCCT

In100 candidate612 (in intron):

LOCUS ENSG00000021645

DESCRIPTION neurexin 3 isoform alpha precursor

[Source:RefSeq\_peptide;Acc:N\_004787]

ACTATCATCCTCATTTCTTTAACATGTATTTCTAGATCCTTTTTTGCTCAGAACATTGTTATGGCATTTCCTCAGAACGCT  
TTTAGTCTCTCTCTTTCTCT

In100 candidate613 (in intron):

LOCUS ENSG00000021645

DESCRIPTION neurexin 3 isoform alpha precursor

[Source:RefSeq\_peptide;Acc:N\_004787]

TTTAAGGTTTACTCTGTACTTTTCATCCCTTTCTATGGGGAAGTAACTCTCTTATTTTCATCCTTTTTATCTTTGTTTCAGCA  
CACACGTGCTCTTTTTTATTT

In100 candidate614 (in intron):

LOCUS ENSG00000021645

DESCRIPTION neurexin 3 isoform alpha precursor

[Source:RefSeq\_peptide;Acc:N\_004787]

AGCTGTTTAACGATGCCATTTGGGAGCCACTCTCTTCTATCTTTCTGTTTCATCATCCTTGATGTATATGCTTTCAGCCT  
CCAGTTTGTGCTCTTAGT

In100 candidate615 (in intron):

LOCUS ENSG00000021645

DESCRIPTION neurexin 3 isoform alpha precursor

[Source:RefSeq\_peptide;Acc:N\_004787]

GTAAAAGGAATAAATTATATATTTATCATAAATTTTAACTCTACAAAATGGCCATATTTATACTTTCTTCAGATTTCTCT  
CAGTTCTAGTTAAGGTTTTT

In100 candidate616 (in intron):

LOCUS ENSG00000021645

DESCRIPTION neurexin 3 isoform alpha precursor

[Source:RefSeq\_peptide;Acc:N\_004787]

AGTTTTCACATCTATTAAATGTGCTGATTTAACTAACTATCTTTATTTCTTTAGGCTCAGACATTTCTTATTTCTTTT  
ATTTCTATAACTGTACTTAT

In100 candidate617 (in intron):

LOCUS ENSG00000021645

DESCRIPTION neurexin 3 isoform alpha precursor

[Source:RefSeq\_peptide;Acc:N\_004787]

AGTTAGAAATTCTAAGTGGTCCTAAGGAATGACCAAATTGAATAACTCAAGTTTTCTTTCTTTTGTCATTACAATCAGTG  
TGCTATCACTTTTTATTTTA

In100 candidate618 (in intron):

LOCUS ENSG00000021645

DESCRIPTION neurexin 3 isoform alpha precursor

[Source:RefSeq\_peptide;Acc:N\_004787]

TAACCTTGCCCTAAAGTCCTGCTCTATACTGGTAACCCTTTTATATCCTTTTCAGACATTTCCCTTCATAGTTCTAGCAA  
TATGCTTGCATTTCTATTTT

In100 candidate619 (in intron):

LOCUS ENSG00000021645

DESCRIPTION neurexin 3 isoform alpha precursor

[Source:RefSeq\_peptide;Acc:N\_004787]

CAATTCCTCTCTAACCCAAGGCAAAATGTTCAACTCTTTTTTGTATTCCCTTAAGAGCCCTTATTTTTTTTTTCAGTTT  
CACCAATCATGTTCAATTTCT

In100 candidate620 (in intron):

LOCUS ENSG00000021645

DESCRIPTION neurexin 3 isoform alpha precursor

[Source:RefSeq\_peptide;Acc:N\_004787]

CTAAATTTGGCTAACTTCCTTGGCCTTGTTCTATCATACTTACTACTTTATCTTCTTTCACTTTGCCAGCGAGTTTATTA  
TTTTCTAGCTGTCTCCGTTT

In100 candidate621 (in intron):

LOCUS ENSG00000113360

DESCRIPTION Ribonuclease 3 (EC 3.1.26.3) (Ribonuclease III) (RNase III)

(Drsha) (p241). [Source:Uniprot/SWISSPROT;Acc:Q9NRR4]

GAACCCATCACTTTTAACCCCCAAATGTGTTCCCTCCTTCCTTATTTTTATCTTCTAAACCAGAAACCTTAGGATTTATTT  
TTGTCCCTAAGCTTTCTTCT

In100 candidate622 (in intron):

LOCUS ENSG00000128923

DESCRIPTION family with sequence similarity 63, member B (FAM63B), transcript variant 1, mRNA [Source:RefSeq\_dna;Acc:NM\_001040450]

ACCTGCACCTGGACAAAGTATTCTCTGTTTATTAAC TTCATGATTT CATCTTTATCTATTTATTTATTTTACCACAGCT  
GATTTTATCTTTTTTTTTTTT

In100 candidate623 (in intron):

LOCUS ENSG00000100629

DESCRIPTION Uncharacterized protein C14orf145.

[Source:Uniprot/SWISSPROT;Ac:Q6ZU80]

AGATAAAGTTGAAAATTTAGAATGAAGAATTTCTGTATAACATTTACCTAGATTCCTTATTATTCATATTTTACCAGAC  
TTGCTTCATCATTTATTCTA

In100 candidate624 (in intron):

LOCUS ENSG00000100629

DESCRIPTION Uncharacterized protein C14orf145.

[Source:Uniprot/SWISSPROT;Ac:Q6ZU80]

ACTCTTGGGCCCATTTATAAATTTGAGATTATCTAACTAGAACCTTATTTCTGTTTGTTATCTTTTAGACATCTATCAGTT  
GTTCAATTCCTCTTTTCCTA

In100 candidate625 (in intron):

LOCUS ENSG00000100629

DESCRIPTION Uncharacterized protein C14orf145.

[Source:Uniprot/SWISSPROT;Ac:Q6ZU80]

AGTAACTTTGCTTAAATTGCATTCGTTTTTATTT CAGCCTTTAATATTATTTGATTTCTCTCTTTCTCTACCTTTTATCC  
TATCTCCCCCTACCCTTTGT

In100 candidate626 (in intron):

LOCUS ENSG00000180776

DESCRIPTION Probable palmitoyltransferase ZDHHC20 (EC 2.3.1.-) (Zinc fingerDHHC domain-containing protein 20) (DHHC-20).

[Source:Uniprot/SWISSPROT;AccQ5W0Z9]

GAAGTTCTTATAAAAGAACTTTTAACTTAAATCATTATCTCTTGGGGCTATTTTTACCGTGTCTCTCAGAGTCTTTTTTT  
TTTTTTTGAGACAGAGTCTC

In100 candidate627 (in intron):

LOCUS ENSG00000165409

DESCRIPTION Thyrotropin receptor precursor (TSH-R) (Thyroid-stimulating hormone receptor). [Source:Uniprot/SWISSPROT;Acc:P16473]

GATGTGAGACATGGAGTCAAAGGAGATCGTTTTGGAGCTTTAACATTTGACTGTCCTGCTGTATTTTCAGACTTGCTGACT  
TTTTGGACTTGTAGCCCCTT

In100 candidate628 (in intron):

LOCUS ENSG00000165409

DESCRIPTION Thyrotropin receptor precursor (TSH-R) (Thyroid-stimulating hormone receptor). [Source:Uniprot/SWISSPROT;Acc:P16473]

TTCTATAACTCCATTTACATTTTGTGTTGAATTTCCCTTTCAGTAATATTACATTTTCATTTCTTGGCTTCATTTTCATCTT  
TATTGGTAAATTCACCTCTT

In100 candidate629 (in intron):

LOCUS ENSG00000147419

DESCRIPTION Coiled-coil domain-containing protein 25.

[Source:Uniprot/SWISSROT;Acc:Q86WR0]

TGAATGGACCTTCTTGTCTTAACCACCTCTCTAATCTTGTTTGCTACAGATTATTCTTTTCAAACATTGGTATTATGTA  
GTCTCACTTTCCTTTGTCTC

In100 candidate630 (in intron):

LOCUS ENSG00000157483

DESCRIPTION Myosin-Ie (Myosin-Ic). [Source:Uniprot/SWISSPROT;Acc:Q12965]

AGGCGTGAGCCACCGCGCCTGGCTATATATAATTAATATAACAACCTAGATACCTTTTCAACTACAGTCTAGGTTTTTAT  
TCTCCTTTGTTCCCTATTAG

In100 candidate631 (in intron):

LOCUS ENSG00000150712

DESCRIPTION myotubularin related protein 12

[Source:RefSeq\_peptide;Acc:NP\_01035536]

GTCTGAGGTACACAAAGGAAGAGGAAGTCAAAAGGGTAACTAGTTGCATGTGTTTTTAGGTTTTATTTCCCATCAGGTTT  
TCCCCACTAGCTCTAGTTTT

In100 candidate632 (in intron):

LOCUS ENSG00000134109

DESCRIPTION ER degradation-enhancing alpha-mannosidase-like 1.

[Source:Unipot/SWISSPROT;Acc:Q92611]

AGGCTCCTCTTGTTTCCGTGACACCATCTAACTGTTTGAAGATGATTTTCCTTTATTTGCTCAGTTCTTCTTTTGATTCC  
TTTCCTTTGAGCTGCGATTC

In100 candidate633 (in intron):

LOCUS ENSG00000165487

DESCRIPTION EF-hand domain-containing family member A1.

[Source:Uniprot/SWISPROT;Acc:Q8IYU8]

CATACTGACATATTGATTCTTTGAAGAGAAATTTAGAACTCATATCTAACAACCCCTACCCTTGTGTTTCCTTAACAGCT  
TTCTTTTCAAAGTTTTTTTA

In100 candidate634 (in intron):

LOCUS ENSG00000196277

DESCRIPTION Metabotropic glutamate receptor 7 precursor (mGluR7).

[Source:Uiprot/SWISSPROT;Acc:Q14831]

CTATCTCTACTTCCATAATTAATTATATACTAACATTTGATTGCATGACCTCTTTACAGTGTTACTGTGTACTAATGCTT  
AGTCTTATTTTGTCTCTCT

In100 candidate635 (in intron):

LOCUS ENSG00000196277

DESCRIPTION Metabotropic glutamate receptor 7 precursor (mGluR7).

[Source:Uiprot/SWISSPROT;Acc:Q14831]

GAGGTCGTAAATCTGGGAGAGTGCCTAACTGTGGCTCAACTTTTTTTCTCCTGGGACAGCCTGTTTGATTGTTACCTGC  
TTTAAATGTTCTTGATTT



In100 candidate636 (in intron):

LOCUS ENSG00000056097

DESCRIPTION zinc finger RNA binding protein

[Source:RefSeq\_peptide;Acc:NP\_07191]

TAAATCTGCTGGCAATTACTAGTATTCCGTCTAGAAAAGATTGTGTTTAACCATTAATAATTTTACTTGTTTTACTCAGGT  
TTTTTCTGTTTTCTCATAT

In100 candidate637 (in intron):

LOCUS ENSG00000056097

DESCRIPTION zinc finger RNA binding protein

[Source:RefSeq\_peptide;Acc:NP\_07191]

AGATTTCTGAAGTGGAAAATCCACTAACATTATTTCTTTGTTTTTATTGCCTTCTCCAGCTGTTTACCTAGTCTTGTTTC  
TATCTCTATAATATTTCTAC

In100 candidate638 (in intron):

LOCUS ENSG00000108953

DESCRIPTION 14-3-3 protein epsilon (14-3-3E).

[Source:Uniprot/SWISSPROT;AccP62258]

AACTGCACATCATTAACATGGTCTTAATGCCTTTATCTTATTGCTGCAGATTTTTTCTTAACCTTTAACTTTTCTGGTTT  
CAGAATGCTGCCAACATTTTC

In100 candidate639 (in intron):

LOCUS ENSG00000121892

DESCRIPTION SCC-112 protein [Source:RefSeq\_peptide;Acc:NP\_056015]

ATTCTGAGTTAATTCTTATATGTATTAACAATCTAGTTTCTTTTTTTGTTTGTGTGTTTGCTTCTTGTTGGATATCCAGGA  
GTTTTTTTGTGTTTGCTTTTG

In100 candidate640 (in intron):

LOCUS ENSG00000188897

DESCRIPTION CDNA FLJ44575 fis, clone UTERU3018154.

[Source:Uniprot/SPTREMBLAcc:Q6ZTK2]

GTCACCTTCCTCCTAGAACCTTTGCTGACCTAACCAATTTTATCAAATTCCTTCTTTATTGTTTTCTTCACAGCCCTC  
AGCATTTCTACCTGTGTTTT

In100 candidate641 (in intron):

LOCUS ENSG00000151388

DESCRIPTION ADAMTS-12 precursor (EC 3.4.24.-) (A disintegrin and  
metalloproeinase with thrombospondin motifs 12) (ADAM-TS 12) (ADAM-TS12).

[Source:Unirot/SWISSPROT;Acc:P58397]

AGAAACCTTCCCTCTAAATACTATTTTCATTGTAACCCATAAATTCACATGTTTTGTTTCCATCTTTATGTAATTCAGTA  
TTTTTTGTAGTTGCTCTTTT

In100 candidate642 (in intron):

LOCUS ENSG00000151388

DESCRIPTION ADAMTS-12 precursor (EC 3.4.24.-) (A disintegrin and  
metalloproeinase with thrombospondin motifs 12) (ADAM-TS 12) (ADAM-TS12).

[Source:Unirot/SWISSPROT;Acc:P58397]

TAATTTGCATTTCCCTGATAGCTAATGATGTTGACTAACTTTTCATGTGCTTTTTTGACATCTGGATATCCTCTTCAGTT  
CTCTTTGTGTAGTTTGCTTG

In100 candidate643 (in intron):

LOCUS ENSG00000042317

DESCRIPTION Spermatogenesis-associated protein 7 (Spermatogenesis-associated  
protein HSD3) (HSD-3.1). [Source:Uniprot/SWISSPROT;Acc:Q9P0W8]

GTGTTTCATTTTGTATTAATAACCATTACCGATAACATTTCTTTACAGGCAATCATAATGGCTTATGCATTTCTTTC  
TCCTTCCTCTGATCTCAGTT

In100 candidate644 (in intron):

LOCUS ENSG00000163694

DESCRIPTION RNA-binding protein (FLJ20273), mRNA

[Source:RefSeq\_dna;Acc:NM\_19027]

TTTAGGGGAATTGACCCAACTGATTATCTTCGTAACTATCTGATGTTCTCTTCATTTTTTGTTCCTTTCCCTCCAGTT  
TTGCCAATTCTGATGCTTTT

In100 candidate645 (in intron):

LOCUS ENSG00000082196

DESCRIPTION Complement C1q tumor necrosis factor-related protein 3 precursor  
(Secretory protein CORS26). [Source:Uniprot/SWISSPROT;Acc:Q9BXJ4]

CTGAGGGAGGGTCTCCATGATAACCTCATTGAATTAGATTATCTTTGTCTTTCCCTCTCTAATTTCCAGCAGTTGACTTT  
CGTCCTCATTCATGCTGTCT

In100 candidate646 (in intron):

LOCUS ENSG00000082196

DESCRIPTION Complement C1q tumor necrosis factor-related protein 3 precursor

(Secretory protein CORS26). [Source:Uniprot/SWISSPROT;Acc:Q9BXJ4]

AAGCAAAGACATGAGAATCCTCTTAATCTGGATACGCTGTGTTTGAAATAACGTGTTTGGTGCTTTCCACTTCTTCAGTT  
TTGTTATTTATTTATTTTTT

In100 candidate647 (in intron):

LOCUS ENSG00000129003

DESCRIPTION Vacuolar protein sorting-associated protein 13C.

[Source:Unipro/SWISSPROT;Acc:Q709C8]

AGTCATTTTCTTCTTTTGCCTTGCAAAACAAACACTTTATAACTTATGTCACCGTGATTACTTTTTCCAGTTCATGCGT  
TGTTTTGTTTCTATCTTCTT

In100 candidate648 (in intron):

LOCUS ENSG00000105953

DESCRIPTION 2-oxoglutarate dehydrogenase E1 component, mitochondrial precursor  
(EC 1.2.4.2) (Alpha-ketoglutarate dehydrogenase).

[Source:Uniprot/SWISSPOT;Acc:Q02218]

ACTGATTTCTCTGTCTTTATTCTGCCCTTTAACCCATGCTAAAGCTTTTTTCTTTTGCTTAGTGCATTTTTCAGTTCTG  
AAATGTCTGTTTTGTTCTCT

In100 candidate649 (in intron):

LOCUS ENSG00000196220

DESCRIPTION SLIT-ROBO Rho GTPase-activating protein 3 (srGAP3) (srGAP2)  
(WAEassociated

Rac GTPase-activating protein) (WRP) (Mental disorder- associted GAP)  
(Rho GTPase-activating protein 14). [Source:Uniprot/SWISSPROT;Acc:43295]

GGAAAATATAAGAATCTAGAAGCCCCTACCTGAAATAACCACTATAAACATTCAATGTATTTTCCTTCCAGACTTCACGTC  
TCTATCAATCACATTTGTTT

In100 candidate650 (in intron):

LOCUS ENSG00000196220

DESCRIPTION SLIT-ROBO Rho GTPase-activating protein 3 (srGAP3) (srGAP2)  
(WAEassociated

Rac GTPase-activating protein) (WRP) (Mental disorder- associted GAP)  
(Rho GTPase-activating protein 14). [Source:Uniprot/SWISSPROT;Acc:43295]

CACCCTAGCTTGGACCTCACGGGCACTTGGATGAGCTGACGGAAAGTAACACACGGGCAACTTCTGCTTTCTCTTCAGCT  
TGTTCAACATTCCCTTTTGC

In100 candidate651 (in intron):

LOCUS ENSG00000048471

DESCRIPTION

TTCCTGTAAAAGTAACATGTTACATGTTAAAGTAAGCCTTTTTGCTATACTCTTGCCTTCCTCTTCAGTCATGCTTCTT  
ACCTTGCTCTGAGCATGTTT

In100 candidate652 (in intron):

LOCUS ENSG00000163697

DESCRIPTION Amyloid beta A4 precursor protein-binding family B member 2 (Fe5-  
like protein). [Source:Uniprot/SWISSPROT;Acc:Q92870]

GTCATAAAATGAATGGCTTTCCGACTTAATTATACGTTTAAGTGATAACGACAATGAGTTTTATCTCTTTGGCTACAGTT  
GGTTTTCTGATTCTCAATTC

In100 candidate653 (in intron):

LOCUS ENSG00000165521

DESCRIPTION echinoderm microtubule associated protein like 5

[Source:RefSeqpeptide;Acc:NP\_899243]

GGATATCTTTTTCTGTTGTTATCACTTTGAATAACCTTTCTACTCCTGTCTCTTTATCTAGCTCCTCTTTAAGGCCAGTA  
ACTCCTTTATTTGCCCTTTT

In100 candidate654 (in intron):

LOCUS ENSG00000165521

DESCRIPTION echinoderm microtubule associated protein like 5

[Source:RefSeqpeptide;Acc:NP\_899243]

AATCTTGATTTAACTCTTCCATTGAATTTTTAACTTATTTTATTTTTTGTCTGGAAGTTCCGTTTGCTTCTTCAGGT  
CTCCTTGGAATACTTTTTATA

In100 candidate655 (in intron):

LOCUS ENSG00000165521

DESCRIPTION echinoderm microtubule associated protein like 5

[Source:RefSeqpeptide;Acc:NP\_899243]

ATAGTGCCTAACACATGGTCTGCTTTCTGAAAGTGTTGCTTTTCCTTTTTCTATATTTGCTCCCTGATTTGACCTCAGCC  
TTTAAATTTTTTTTTTGACA

In100 candidate656 (in intron):

LOCUS ENSG00000165521

DESCRIPTION echinoderm microtubule associated protein like 5

[Source:RefSeqpeptide;Acc:NP\_899243]

CCATTTAACCTGCTGCCAATCTGTTGATCACTTCCTGGTTCTCAGTGTATTACCTCACAGCAGTTTGTGACACAATTTA  
TCATTCCCTTTTTTTTTTTCT

In100 candidate657 (in intron):

LOCUS ENSG00000171914

DESCRIPTION Talin-2. [Source:Uniprot/SWISSPROT;Acc:Q9Y4G6]

AGTTATGGGTAACTGACATTGGATTTCTTACTCTATTCTTCTGATTCTTGAGATCATATCTCAGAGCTTTTCTTGATTTC  
TTAATGTACTGCATGTTCCC

In100 candidate658 (in intron):

LOCUS ENSG00000140694

DESCRIPTION Poly(A)-specific ribonuclease PARN (EC 3.1.13.4) (Polyadenylate  
specific ribonuclease) (Deadenylating nuclease) (Deadenylation nuclease).

Source:Uniprot/SWISSPROT;Acc:O95453]

AATCTGTAGTGATAACTGGTTTTTATTCGTGATATTACTCATTTGTGTCTCATTTTTTCCTTGTTTCATTCCAGTCAGCTGT  
TACCATTTTGTTGATCTCTC

In100 candidate659 (in intron):

LOCUS ENSG00000064042

DESCRIPTION

GAAAACACTGTGTTTGAATAAATGTATTCCAATAGGCCTATTTATTAAGTGGGAAACACTTACCTAGTCTTCAGAATTAA  
TATTGCCCTTGCACTCCTTT

In100 candidate660 (in intron):

LOCUS ENSG00000147421

DESCRIPTION Homeobox-containing protein 1.

[Source:Uniprot/SWISSPROT;Acc:Q6T76]

AAAAAACCATTTAATTCTTTTCCCCACAAAAGTACATTCTTTTATTTAACCTGAATAAATATTCTCTTAAATTCAGCT  
TCATTTTCGTAGGTCATTCT

In100 candidate661 (in intron):

LOCUS ENSG00000147421

DESCRIPTION Homeobox-containing protein 1.

[Source:Uniprot/SWISSPROT;Acc:Q6T76]

CCTTATGAATTTCTGTTTATCAAGATTATCTCTGTTGTTACCCTCATTTTAACTTCTTGACCAATTTAGTCCTTGCAGAC  
CTCTCTTTTTTTTCTGAAATT

In100 candidate662 (in intron):

LOCUS ENSG00000197892

DESCRIPTION Kinesin-like protein KIF13B (Kinesin-like protein GAKIN).

[Source:Uniprot/SWISSPROT;Acc:Q9NQT8]

AGCATTTGGAATCTTTTTTTTTTTTTTCCTTTGTTTTCTTTTCCTAACCTCCTGCAAGACTTTGTTTCTTTCTGTGCAGTT  
TCATCTGTTAGTCATCGTTC



In100 candidate663 (in intron):

LOCUS ENSG00000053254

DESCRIPTION Checkpoint suppressor 1 (Forkhead box protein N3).

[Source:Unipot/SWISSPROT;Acc:O00409]

CAACTTCCTTTCTTCTAACTCATGGCTTATTCTGTTTCCTTCCTAGCAGGTATTACAGTCTGTCATAATCTTGCTTATTT  
ATTTCTTTACTTACTGTGTT

In100 candidate664 (in intron):

LOCUS ENSG00000140025

DESCRIPTION Full-length cDNA clone CS0DG007YH10 of B cells (Ramos cell line  
of Homo sapiens (human). [Source:Uniprot/SPTREMBL;Acc:Q86T09]

GATTTGAGGCTGCAACATTAACCTCTCCCTTGACTCTCTGTTATGTTGCATTGGTCTGTTTGTCTATCTTTGTGCCAGTA  
TCACACTCTCTTTATTATAT

In100 candidate665 (in intron):

LOCUS ENSG00000109133

DESCRIPTION Transmembrane protein 33 (DB83 protein).

[Source:Uniprot/SWISSPOT;Acc:P57088]

GTAGCAAATTAACATTCATTTTTACTTGATTTCTTGAGTTTTAGCCTTTTTTCTTTCTGGTCCCTATATTCATTTTCAGAC  
ATTATCTTATATTCTCTTGC

In100 candidate666 (in intron):

LOCUS ENSG00000042088

DESCRIPTION Tyrosyl-DNA phosphodiesterase 1 (EC 3.1.4.-) (Tyr-DNA  
phosphodisterase 1). [Source:Uniprot/SWISSPROT;Acc:Q9NUW8]

AGCACTTGCTATGCTAATATAAGAACATTTCTATTTTAATTTAACATCCTAAGTCTTTATGTTGCCACCACTTTCAGTGT

TTCTTTTTTTGTTTTGGAG

In100 candidate667 (in intron):

LOCUS ENSG00000164742

DESCRIPTION Adenylate cyclase type 1 (EC 4.6.1.1) (Adenylate cyclase type I (ATP pyrophosphate-lyase 1) (Adenylyl cyclase 1) (Ca(2+)/calmodulin- activated adenylyl cyclase). [Source:Uniprot/SWISSPROT;Acc:Q08828]

TAAAAATATCTGATCTGTTTATTCATGTAGTAACTATTTCCCTTGCTTTTCATTCATTTATGCAGTCTATTTCTTTGTGT  
TTTATGTATCTGCCTAAATT

In100 candidate668 (in intron):

LOCUS ENSG00000014824

DESCRIPTION solute carrier family 30 (zinc transporter), member 9  
[Source:RfSeq\_peptide;Acc:NP\_006336]

AGGCTGTCATTAGATACATACATATTTAGAATTATTACCTAACACTGATGAATTATTCCCTCTATCATTTGTGCAGCTACT  
GTTTTTCTTTAGTGAGCTCT

In100 candidate669 (in exon):

LOCUS ENSG00000166128

DESCRIPTION Ras-related protein Rab-8B. [Source:Uniprot/SWISSPROT;Acc:Q9293]

AGGACCTAACTCGTTTTTTCCTTGTTTTATTACCTGTTGCAGAAGCGGTTATCTTTCTTTTTTACTTTGCACATCAGTGT  
TAGCCTTTCCTATTTTCAGC

In100 candidate670 (in intron):

LOCUS ENSG00000152315

DESCRIPTION Potassium channel subfamily K member 13 (Tandem pore domain  
halothane- inhibited potassium channel 1) (THIK-1).

[Source:Uniprot/SWISSPROT;Ac:Q9HB14]

TCATCACCTCGAAATAACCTGATTGAAAATTTTCGTGTATTTTTCCCCCTTTTCTATGTATGTCCGTGGCAGACATTGTC  
ATTTCTGAGGTCCATCTCTT

In100 candidate671 (in intron):

LOCUS ENSG00000132383

DESCRIPTION Replication protein A 70 kDa DNA-binding subunit (RP-A) (RF-A)  
Replication factor-A protein 1) (Single-stranded DNA-binding protein) (p70)

[Source:Uniprot/SWISSPROT;Acc:P27694]

TACTTGTTCTGTCATTTACTGAGAGGGATATTGAAATCTCTAACTGTAATAATTGTAAGTTTCTCTGTCTCTCTGCAGTT  
CTATTAGTTTTTGGCTTCATG

In100 candidate672 (in intron):

LOCUS ENSG00000113494

DESCRIPTION Prolactin receptor precursor (PRL-R).

[Source:Uniprot/SWISSPROTAcc:P16471]

TTTTATTTTCTCTACTTGCTCATTTCTAAATGATATTTTAACATCTATATTTTTTATTGCTCTAATTCTCCAGTTTATT  
CTCCATTCCATGCAAATCTT

In100 candidate673 (in intron):

LOCUS ENSG00000182326

DESCRIPTION Complement C1s subcomponent precursor (EC 3.4.21.42) (C1 esterase)

[Contains: Complement C1s subcomponent heavy chain; Complement C1s subcoponent light chain]. [Source:Uniprot/SWISSPROT;Acc:P09871]

CCTTTCCTACTTTTTCTTACCCTTATGGTTTTGGATTTAACCTCATTCTCCCTTCTTGGTGTTTGGTTCTTGACCTCAGCC  
TCTTCTACTCTTTGTAGAC

In100 candidate674 (in intron):

LOCUS ENSG00000140455

DESCRIPTION Ubiquitin carboxyl-terminal hydrolase 3 (EC 3.1.2.15) (Ubiquitin thioesterase 3) (Ubiquitin-specific-processing protease 3) (Deubiquitinating enzyme 3). [Source:Uniprot/SWISSPROT;Acc:Q9Y6I4]

TCATATTAAATTGAAATGCATTTGCTGAAAATGTCTCTTAACTGTTGTTTATTATCTTAAACTCTTTTTTTACCCAGCA  
GCTTTTTTAACTTTGCTCTGC

In100 candidate675 (in intron):

LOCUS ENSG00000152582

DESCRIPTION KPL2 protein isoform 2 [Source:RefSeq\_peptide;Acc:NP\_653323]

GTGAACTAGTAAAGCTCTTTAGCTCATTGTAGTTAAACTAATAACCATCATTCTAGTCTGAATTTCTTCTTTCTCCAGTT  
CTTCTGATCTCTTTTCACTC

In100 candidate676 (in intron):

LOCUS ENSG00000166780

DESCRIPTION Uncharacterized protein C16orf45.

[Source:Uniprot/SWISSPROT;AccQ96MC5]

AAATGTGTGAACAACCTTTTGTAATCTAACCTACTGACCTGCATGTTTTTTCTTTACCCCAGCTCATTCCTTACATGTAG  
CCTCAATCTTCAGTTTGCTT

In100 candidate677 (in intron):

LOCUS ENSG00000070366

DESCRIPTION Telomerase-binding protein EST1A (EC 3.1.--) (Ever shorter  
telmeres 1A) (Telomerase subunit EST1A) (EST1-like protein A) (hSmg5/7a).

[Souce:Uniprot/SWISSPROT;Acc:Q86US8]

TGTTTGTCTTTATTATTACGTCTTAAGAGTTCTCTCTATAACCTGGACATAAGCCCTTATCCGATTTATATTTTGCAGAA  
ATTTTCTCCGGGTGCTTTCT

In100 candidate678 (in intron):

LOCUS ENSG00000070366

DESCRIPTION Telomerase-binding protein EST1A (EC 3.1.--) (Ever shorter  
telmeres 1A) (Telomerase subunit EST1A) (EST1-like protein A) (hSmg5/7a).

[Souce:Uniprot/SWISSPROT;Acc:Q86US8]

TTATGATTGTAACTTCTTTTTTTCTTTCACCTTTGAACTGTTGTCCAGTCTAAGACATCCTGTTATAGCATGTTCTATG  
TATCTTTTTTCTATTTTTTTT

In100 candidate679 (in intron):

LOCUS ENSG00000070366

DESCRIPTION Telomerase-binding protein EST1A (EC 3.1.--) (Ever shorter  
telmeres 1A) (Telomerase subunit EST1A) (EST1-like protein A) (hSmg5/7a).

[Souce:Uniprot/SWISSPROT;Acc:Q86US8]

TTAAGTCTTCTATTGCATTATTTGTTCTCTTACATTATATCTTATAACCTTTATTTTTTTTTGCCTGCCTTTTAGTCAGTC  
CCTTTATATCTTTTTTTTTTTT

In100 candidate680 (in intron):

LOCUS ENSG00000183783

DESCRIPTION BTB/POZ domain-containing protein KCTD8.

[Source:Uniprot/SWISSPOT;Acc:Q6ZWB6]

AATGTGCCTAGAGGAGAAATTCTATTTTCTAACATCTCCCCTCTCTTTCTTGGTCCTTCTTACAGCATCTCATTTTACTC  
AAGTCTGTGATCCTTGTCTT

In100 candidate681 (in intron):

LOCUS ENSG00000136273

DESCRIPTION Checkpoint protein HUS1 (hHUS1).

[Source:Uniprot/SWISSPROT;Acc:60921]

AGATCCTTTTAACTCTTTGTTTCTGTTTGGTAAATTTTATCTTTCTCCTTTCCATCCCAGTTTCTCTTACTATTCTCTCT  
GTGGTGCCTATTTGCTCTAG

In100 candidate682 (in intron):

LOCUS ENSG00000100784

DESCRIPTION Ribosomal protein S6 kinase alpha-5 (EC 2.7.11.1) (Nuclear  
mito- and stress-activated protein kinase 1) (90 kDa ribosomal protein S6  
kinase 5) (RSK-like protein kinase) (RSKL). [Source:Uniprot/SWISSPROT;Acc:O7558]

CCATTTAACTATTCAAGCCCAAATTCTTGCCTTGCTTTCAGTTTCCCCTGTCTTTTTTTCGCCCAGCTTACCCTGATATTC  
TGCCTACTTTCTATTTTTTTT

In100 candidate683 (in intron):

LOCUS ENSG00000100784

DESCRIPTION Ribosomal protein S6 kinase alpha-5 (EC 2.7.11.1) (Nuclear  
mitoen- and stress-activated protein kinase 1) (90 kDa ribosomal protein S6  
kinse 5) (RSK-like protein kinase) (RSKL). [Source:Uniprot/SWISSPROT;Acc:O7558]  
CATAACATATGAACACCATATAATTCATAAAGCTTTTCCTTGTTCTTTTTTTTATTCCTGCACAGTCCTTCGTTCCATTC  
CATTGTATACTTAACTGGTT

In100 candidate684 (in intron):

LOCUS ENSG00000165392

DESCRIPTION Werner syndrome ATP-dependent helicase (EC 3.6.1.-).  
[Source:Unprot/SWISSPROT;Acc:Q14191]

AGCAACACTATTAAGTGAAGACTTCTATAATTTTTTCTTTTATTTCTGATTCTTTCTTCGGTTTTCCCCCTCAGTTTGT  
AACTTTTCTAATTTTGATTT

In100 candidate685 (in intron):

LOCUS ENSG00000132972

DESCRIPTION RING finger protein 17. [Source:Uniprot/SWISSPROT;Acc:Q9BXT8]  
TCTTTTTTCTTAAGTTGTAAGAGTACTTTATGTGATAGCAATATTAACATTTTCATCCTGTGTAAGTGTCTTTCTCCCAGCC  
TCTCACTTTTGATTTTATTTG

In100 candidate686 (in intron):

LOCUS ENSG00000132972

DESCRIPTION RING finger protein 17. [Source:Uniprot/SWISSPROT;Acc:Q9BXT8]

ATCTCCTATGTCCATAACCTATCTTCATTTCTACTGCCTTATTTAATTCTCATGTTATTTTGTGTAGCTCCTTGTCAGAC  
TCTTCCTTAATGCTATAGTT

In100 candidate687 (in intron):

LOCUS ENSG00000168685

DESCRIPTION Interleukin-7 receptor alpha chain precursor (IL-7R-alpha) (CD17  
antigen) (CDw127). [Source:Uniprot/SWISSPROT;Acc:P16871]

CCACTTCCTTGCCCACTCAAACATACTTACCCTTTAACATATCTCTTGACTTTTCCTGTCATATTGTAATCTGTCCAGAG  
CCTCCTCTATTTGGGTTTTTC

In100 candidate688 (in intron):

LOCUS ENSG00000168685

DESCRIPTION Interleukin-7 receptor alpha chain precursor (IL-7R-alpha) (CD17  
antigen) (CDw127). [Source:Uniprot/SWISSPROT;Acc:P16871]

ATGTGATATTATGTATATAACCCTTTATACTATGTTATCATTTTCTTTAACACTTTTTTTAATCAATATTTTTTACAGCT  
CTTATTTCTTACATATATTC

In100 candidate689 (in intron):

LOCUS ENSG00000157168

DESCRIPTION Pro-neuregulin-1, membrane-bound isoform precursor (Pro-NRG1)  
[ontains: Neuregulin-1 (Neu differentiation factor) (Heregulin) (HRG) (Breas



cancer cell differentiation factor p45) (Acetylcholine receptor-inducing  
ativity) (ARIA) (Sensory and motor neuro [Source:Uniprot/SWISSPROT;Acc:Q0229]  
TCCCTAACTCCATAAATATTAACCTACCCTCTTCTCCTTTTCCATTGATTTTTTGGTTCTTTTCTATAAATTCATTCAGAA  
ACTCAATTCCTTATTTTCT

In100 candidate690 (in intron):

LOCUS ENSG00000157168

DESCRIPTION Pro-neuregulin-1, membrane-bound isoform precursor (Pro-NG1)  
[ontains: Neuregulin-1 (Neu differentiation factor) (Heregulin) (HRG) (Breas  
cancer cell differentiation factor p45) (Acetylcholine receptor-inducing  
ativity) (ARIA) (Sensory and motor neuro [Source:Uniprot/SWISSPROT;Acc:Q0229]  
ACACTGTAACTGTCTGCTTGGCTTTTTGAGGCTTCCAGAGTTCAGAATTGTCTTCTCTTGAATAGGTCAGTGCATTTTT  
TTCCTTCAGTTTTTCTCCTT

In100 candidate691 (in intron):

LOCUS ENSG00000157168

DESCRIPTION Pro-neuregulin-1, membrane-bound isoform precursor (Pro-NG1)  
[ontains: Neuregulin-1 (Neu differentiation factor) (Heregulin) (HRG) (Breas  
cancer cell differentiation factor p45) (Acetylcholine receptor-inducing  
ativity) (ARIA) (Sensory and motor neuro [Source:Uniprot/SWISSPROT;Acc:Q0229]  
AAAAAAAAAAGAATGGATATAATTTAATATGTAACCTTCTCTTCCAATCTTTAGCTATGCTGTTGATTTTCTTCCCAGTC  
TTCAGCTATGTTGTTTTTGT

In100 candidate692 (in intron):

LOCUS ENSG00000157168

DESCRIPTION Pro-neuregulin-1, membrane-bound isoform precursor (Pro-NG1)

[ontains: Neuregulin-1 (Neu differentiation factor) (Heregulin) (HRG) (Breas  
cancer cell differentiation factor p45) (Acetylcholine receptor-inducing  
ativity) (ARIA) (Sensory and motor neuro [Source:Uniprot/SWISSPROT;Acc:Q0229]  
AATAAGATTCTTTATCTATATGGCATAGTGGGTGAAAGGACACACTAACCTTACCTACTGCTCCTTTTATGTCAGAAAAT  
CCATTTTCTAATCACTTTTT

In100 candidate693 (in intron):

LOCUS ENSG00000157168

DESCRIPTION Pro-neuregulin-1, membrane-bound isoform precursor (Pro-NRG1)

[ontains: Neuregulin-1 (Neu differentiation factor) (Heregulin) (HRG) (Breas  
cancer cell differentiation factor p45) (Acetylcholine receptor-inducing  
ativity) (ARIA) (Sensory and motor neuro [Source:Uniprot/SWISSPROT;Acc:Q0229]  
ATATGGAAGGTTATTTGTTTTTAACAATCCCTATGTTAAGTTTTCTTTTTTCTATGTTTCAATTGACTTATTTTGTCAGAT  
TTTAGGTTTTTTTTTTTTTTT

In100 candidate694 (in intron):

LOCUS ENSG00000157168

DESCRIPTION Pro-neuregulin-1, membrane-bound isoform precursor (Pro-NRG1)

[ontains: Neuregulin-1 (Neu differentiation factor) (Heregulin) (HRG) (Breas  
cancer cell differentiation factor p45) (Acetylcholine receptor-inducing  
ativity) (ARIA) (Sensory and motor neuro [Source:Uniprot/SWISSPROT;Acc:Q0229]

ACATCATTATTTTTGACATTGAGGATGTCATTTTGTAAATTAACCTATGACATTTTACTTTTTGGTTAATCCTTCAGAT  
TTACTCTTCATTGCTTTTAA

In100 candidate695 (in intron):

LOCUS ENSG00000177675

DESCRIPTION Scavenger receptor cysteine-rich type 1 protein M160 precursor  
CD163 antigen-like 1) (CD163b antigen). [Source:Uniprot/SWISSPROT;Acc:Q9NR1]  
TTTTTTAAAGTCTTGGATACATATTAACAAATTATCATCTATAAATTGTGTTTTTTTCTTCTATTCAATTTTCAGTTCCT  
ATTATTCCACTATATCATAT

In100 candidate696 (in intron):

LOCUS ENSG00000177675

DESCRIPTION Scavenger receptor cysteine-rich type 1 protein M160 precursor  
CD163 antigen-like 1) (CD163b antigen). [Source:Uniprot/SWISSPROT;Acc:Q9NR1]  
TTAACAATATTAATTCTTTCCATCTATGAGCATGAAATATACTTCTTTTTTTTTGTCTCTTCTATTTCTTTCATCAGTG  
TTTTATAGTTTTCTTTGTAT

In100 candidate697 (in intron):

LOCUS ENSG00000179869

DESCRIPTION ATP-binding cassette sub-family A member 13.  
[Source:Uniprot/SWSSPROT;Acc:Q86UQ4]  
TTGTAATCTTTAACTGATTTATTTTTTTTATAATTTTTATCCCCTTCTTCAGAATCCCCACTTACTAATGTGGTTGTCAG  
ACTTTTCTTTAATTCTTTTT

In100 candidate698 (in intron):

LOCUS ENSG00000179869

DESCRIPTION ATP-binding cassette sub-family A member 13.

[Source:Uniprot/SWSSPROT;Acc:Q86UQ4]

TCTCATTCTGTGGGTTGTCTTTTTATTTTAACTCTGTTGATAGTTTCTTTTGCTTTGCAAAGCCCTTCAGTTTACTTA  
GGTCTCACTTGTCACTTTTT

In100 candidate699 (in intron):

LOCUS ENSG00000133392

DESCRIPTION Myosin-11 (Myosin heavy chain 11) (Myosin heavy chain, smooth  
mscle isoform) (SMMHC). [Source:Uniprot/SWISSPROT;Acc:P35749]

GTAAGTGTATATAGGATCTTTTTCACCATCCTTGAAATCCCCTTAGTGCTTTCATAGTGGATTCTTGTTTCCCAGTT  
TTCATGTCTTCCTCTTTCTT

In100 candidate700 (in intron):

LOCUS ENSG00000042813

DESCRIPTION Zona pellucida-binding protein 1 precursor (Sp38).

[Source:Unipot/SWISSPROT;Acc:Q9BS86]

CACACATTTTACATGCAAATTTGTATGTAAAAAGTCATTAACAAACCCAAGGTCACCTTTAATTTTCTTTGTTTCCAGCT  
TTCCAGTTTGTGTATTTTA

In100 candidate701 (in intron):

LOCUS ENSG00000168671

DESCRIPTION UDP glycosyltransferase 3 family, polypeptide A2

[Source:RefSeqpeptide;Acc:NP\_777574]

AGATTCTTCAAGATCACGGTCATAATGTCACCATGCTTAACCACAAAAGAGGTCCTTTTATGCCAGGTATCTTTTCTCAC  
TTTTCTTGATTTCTCCTACT

In100 candidate702 (in exon):

LOCUS ENSG00000168671

DESCRIPTION UDP glycosyltransferase 3 family, polypeptide A2

[Source:RefSeqpeptide;Acc:NP\_777574]

AGCCTCTCTCACTCCTGCCCCTACTATCTATCATGGAATAACATCCAAGAAAGACACCTTGCATATTCTTTTCAGTTTCTG  
TTTTGTTCTCCACATATTC

In100 candidate703 (in intron):

LOCUS ENSG00000151834

DESCRIPTION Gamma-aminobutyric-acid receptor subunit alpha-2 precursor

(GAB(A) receptor subunit alpha-2). [Source:Uniprot/SWISSPROT;Acc:P47869]

TTTCATGACCTTAAATATTAACCTATATGTAGTTTATTCACAAATTTTAATTTCTAGCCCTGATGCTTTTTTTTTTCAGCT  
TTGCTTATTATTGCTCACAT

In100 candidate704 (in intron):

LOCUS ENSG00000164187

DESCRIPTION LMBR1 domain containing 2 [Source:RefSeq\_peptide;Acc:NP\_00100758]

CTTTAAATCATTTTGATTTGATTTTTATATATGGGGAGATAACTGGTCTAGTTTCATTCTTCTGCATATATCCAGTTTTTC  
CAGTTTTCTGGCACCATT

In100 candidate705 (in intron):

LOCUS ENSG00000127804

DESCRIPTION methyltransferase 10 domain containing

[Source:RefSeq\_peptide;Ac:NP\_076991]

AATGGCATGTTTAACTATTACTAGCTTTTCTTGTCTTCTAAATATTTCTTTTCCTTCATCTCCTGAAGAACCTTACAGTA  
TCTTTTTTTTTTTTTTTTTTTT

In100 candidate706 (in intron):

LOCUS ENSG00000164500

DESCRIPTION

ACTTTCCTCAAATGGGGAGTGGAATTCTTTGAACATGCGACTAACCTGGAAATCCATTTCCCGGCTTGTATGTTTCAGTA  
TCTTTAATAGCTTTGTTCCC

In100 candidate707 (in intron):

LOCUS ENSG00000007168

DESCRIPTION Platelet-activating factor acetylhydrolase IB subunit alpha (PA  
acetylhydrolase 45 kDa subunit) (PAF-AH 45 kDa subunit) (PAF-AH alpha) (PAAH  
alpha) (Lissencephaly-1 protein) (LIS-1). [Source:Uniprot/SWISSPROT;Acc:43034]

TAGTCTTGGGGATTAAACATTAGGCTCCTTGCTTCTTATGCAGATTTCTGCAGCCAGCTTGAATTTCTCCCCAGAAAATGG  
GTTTTTCCTTTCTTTTTTTT

In100 candidate708 (in intron):

LOCUS ENSG00000133393

DESCRIPTION Lish domain-containing protein C16orf63.

[Source:Uniprot/SWISSPOT;Acc:Q96NB1]

CCTTTCTCCCTCTTCTATTGGAGCATCTTAACCTTCTATTGGAGCATCTTTCCTTTCTGTTGGCCCTGTTTCAGATAGTAAC  
TCCTTTATGGCATTTCCTC

In100 candidate709 (in intron):

LOCUS ENSG00000103222

DESCRIPTION Multidrug resistance-associated protein 1 (ATP-binding  
cassettesub- family C member 1) (Leukotriene C(4) transporter) (LTC4  
transporter). Source:Uniprot/SWISSPROT;Acc:P33527]

AGCTGTTTTTGACTTGAGTAGGTCATCCTCCCTTAACATTCCTTGTTTCCTGGTCTTTTTTTTTTTTCCTTTGAGGCAGAG  
TTTCGCTCTTTTTTCCCAGG

In100 candidate710 (in intron):

LOCUS ENSG00000169118

DESCRIPTION Casein kinase I isoform gamma-1 (EC 2.7.11.1) (CKI-gamma 1).

[Source:Uniprot/SWISSPROT;Acc:Q9HCP0]

ATCCTATTGCTGGATTGTTCTCTTTAACATTGTATAATTACCTTCTTTGTTGCTTTTTACAGCTTTGACTTAAGATCTTT  
TGATATATCTACTCCTCCTT

In100 candidate711 (in intron):

LOCUS ENSG00000172728

DESCRIPTION fucosyltransferase 10 [Source:RefSeq\_peptide;Acc:NP\_116053]

CCTAACATATTACATAATGTATCAACTTTATTTTTCCCCCAGAAAACATTGTTCTGCAGTCCCCATCCTCCTTCTTTTCT  
TTTTATCGATACATAATATT

In100 candidate712 (in intron):

LOCUS ENSG00000170516

DESCRIPTION Cytochrome c oxidase polypeptide VIIb2, mitochondrial precursor(EC 1.9.3.1). [Source:Uniprot/SWISSPROT;Acc:Q8TF08]

AGCTCTACTGCTCTCTAAGCCTTTGTTCCCCGGTAACTTGCATTACCTCTTTCTTTATGCCTCTGTCACAGTCTGTCAC  
GCTTCATGTTCTTGGTATTT

In100 candidate713 (in intron):

LOCUS ENSG00000111704

DESCRIPTION Homeobox protein NANOG (Homeobox transcription factor Nanog) (hanog). [Source:Uniprot/SWISSPROT;Acc:Q9H9S0]

AGGGTAGGAGAAACCCTAACTCACACTGGTTCTCATTAATAAAACTTTTTTTTTTCCTTTTTTTCTTTCTGCCAGCAA  
CTCCAGCTTGTTTTGTTTTT

In100 candidate714 (in intron):

LOCUS ENSG00000171970

DESCRIPTION Zinc finger protein 57. [Source:Uniprot/SWISSPROT;Acc:Q68EA5]

AGGGTAACCACTGTCCTGATTTTTTTTTTCATTCTCTCTACCTTTACCATTTATTATTATCACCATACAGAGTTTAAAT  
TTTGCCTCCTTTGAATTTTT

In100 candidate715 (in intron):

LOCUS ENSG00000173262



DESCRIPTION Solute carrier family 2, facilitated glucose transporter member14  
(Glucose transporter type 14). [Source:Uniprot/SWISSPROT;Acc:Q8TDB8]

AGCAAATCCTTTCTGTTGTAAATTAACCTGTCATCTGTTTTCCCTTCCTTGTGATTCAGATGAACTATTCTTCCTTTCTT  
TGTTTCTAGGTCTCATGATT

In100 candidate716 (in intron):

LOCUS ENSG00000185101

DESCRIPTION tumor protein p53 inducible protein 5  
[Source:RefSeq\_peptide;Ac:NP\_001012302]

ATTTCCTTGTGTTTACGTTTAACAATTAAAGTCTTAATTTCTAAGAGTGTTTTGTTTCCTCTTTATTTTTTATTACAGCA  
TCCCTTCCGTGTTTTTATGT

In100 candidate717 (in intron):

LOCUS ENSG00000176654

DESCRIPTION Homeobox protein NANOG2. [Source:Uniprot/SWISSPROT;Acc:Q8N7R0]  
EXON

TAGGAGAATTCCTAACTTACACTGGTTCTCATTAATAAAATAAAACTACCTCTTCTTTTCCTTTTTTTCTTTCTGCCAGCA  
GCCTCCAGCTTCTTTTGTTT

In100 candidate718 (in intron):

LOCUS ENSG00000079215

DESCRIPTION Excitatory amino acid transporter 1 (Sodium-dependent  
glutamateaspartate transporter 1) (Glial glutamate transporter) (GLAST-1).  
[Source:Uiprot/SWISSPROT;Acc:P43003]

ATGGACAAGTTTAGATAACAAGGGCTGGTATTTTTCACTAACACTTGGTTTCCTCTGTGTGTTTTGCTTTTTTCAGATTTA  
TCTTTTCTGTGTTGAAATCC

In100 candidate719 (in intron):

LOCUS ENSG00000059804

DESCRIPTION Solute carrier family 2, facilitated glucose transporter member3

(Glucose transporter type 3, brain). [Source:Uniprot/SWISSPROT;Acc:P11169

TTAACTTCTTCCTTCCCCAATTTTCTTTCATTTTTACCAAGTTAACTTCACATTCTTATCTCCAGATAAGTTCTTTAGTA  
TAATCTATTCCTTTGTCTTC

In100 candidate720 (in intron):

LOCUS ENSG00000163288

DESCRIPTION Gamma-aminobutyric-acid receptor subunit beta-1 precursor (GABAA)

receptor subunit beta-1). [Source:Uniprot/SWISSPROT;Acc:P18505]

TCATTCACTCTCTAACAATAAACTCTGCCCTTATGGCTACTTTCTGCATTTTTCTCCATTTTCTTTCTTTCTCTACAGGC  
TAGCTTCCTCTTTTGATTCA

In100 candidate721 (in intron):

LOCUS ENSG00000163288

DESCRIPTION Gamma-aminobutyric-acid receptor subunit beta-1 precursor (GABAA)

receptor subunit beta-1). [Source:Uniprot/SWISSPROT;Acc:P18505]

GTAACCCCTGATTATATAATGGCCTTCTTTGTATTTTTTTTACAGTTTTTTGTCTTAAATAAATCTATTTTGCTTATATA  
ATTATAGTTTCCCTCCTCCC

In100 candidate722 (in intron):

LOCUS ENSG00000180357

DESCRIPTION zinc finger protein 609 [Source:RefSeq\_peptide;Acc:NP\_055857]

GGAAAGAAAGAAGATGGGAAAGAGACCTGAGCTCACAATATCATGTGTAACAAAATCACTTTTTCCTATTTGCCTCAGAA  
TTACTCTTTTTCCTAATTG

In100 candidate723 (in intron):

LOCUS ENSG00000180357

DESCRIPTION zinc finger protein 609 [Source:RefSeq\_peptide;Acc:NP\_055857]

CTTTTGGCTTCTACTATTTACTTAACTGAACTTAACGAGTCCATTTTTTCCTTTCTCTTCCTTCCCTTTCTCTTCAGTG  
GATCTGTTTCTTCCCTTTAA

In100 candidate724 (in intron):

LOCUS ENSG00000180357

DESCRIPTION zinc finger protein 609 [Source:RefSeq\_peptide;Acc:NP\_055857]

AGTGACTTGTTATCTAACCTATTACTTTGTTTTGTTTTATTTTTATAACAGCACTTACTACTTTCTGATATTGTCATCTT  
GTTTGTCAGTTTTTCTCTTC

In100 candidate725 (in intron):

LOCUS ENSG00000180357

DESCRIPTION zinc finger protein 609 [Source:RefSeq\_peptide;Acc:NP\_055857]

ACTTCTTGCTAAGTTTATTTAACACTAGCCATTTTCTTCTTTAACTTCATTTCCCCTTGACTTCTTATGACAGTG TTC  
AGTTTTGGTTCTTAATTCTT

In100 candidate726 (in intron):

LOCUS ENSG00000180357

DESCRIPTION zinc finger protein 609 [Source:RefSeq\_peptide;Acc:NP\_055857]

CTTGAAACTCTCCTCTCTTGCCTTGGTCATAAATCTCATTTCTCTTTATAACTGGTTATTCTCTCTATTTTGTGCCAGTC  
TCTCTTCCTTCTTGTATTCA

In100 candidate727 (in intron):

LOCUS ENSG00000156687

DESCRIPTION Netrin receptor UNC5D precursor (Unc-5 homolog D) (Unc-5 homolog 4). [Source:Uniprot/SWISSPROT;Acc:Q6UXZ4]

AGCATTAAACCAAGGAGGGTGATCCTTAACATTGAATTGTGTTTTCTCTGCTGTGTTTCAGACTTGTTTTATATGATCAT  
ATTCTGCTTTCCTGTTTGGC

In100 candidate728 (in intron):

LOCUS ENSG00000164190

DESCRIPTION Nipped-B-like protein (Delangin) (SCC2 homolog).  
[Source:Unipro/SWISSPROT;Acc:Q6KC79]

AGTTGATTTAGAAAACAAATACTAATATTTTTATTATGCTAACTTAGTTAAAATTTTCCTTTTATCTTCAGATTTACATT  
TTTTTTTTTAAATTTACCTTT

In100 candidate729 (in intron):

LOCUS ENSG00000205813

DESCRIPTION Olfactory receptor 3A2 (Olfactory receptor 17-228) (OR17-228).  
Source:Uniprot/SWISSPROT;Acc:P47893]

AGCTCATAACTGTATTTATTTGTTATTTGTATTTCTTCTTTGCAGATTTCTTTTTCTTTTTTTGTCTTTTTTTTTTTTTTT  
TTTTTGCCCTTTTGGTGATA

In100 candidate730 (in intron):

LOCUS ENSG00000145244

DESCRIPTION Atrial natriuretic peptide-converting enzyme (EC 3.4.21.-)  
(proANP- converting enzyme) (Corin) (Heart-specific serine proteinase ATC2)  
(Trnsmembrane protease, serine 10). [Source:Uniprot/SWISSPROT;Acc:Q9Y5Q5]  
TATCACTACATCCTTCTTGAAATACTTTCATTTTCTTCTAAAATAACACAAAACTCCTTGTTTTCTTCATATGTCAGAG  
ACTAACTCTTTTTCTCTTTT

In100 candidate731 (in intron):

LOCUS ENSG00000146648

DESCRIPTION Epidermal growth factor receptor precursor (EC 2.7.10.1) (Receptor  
tyrosine-protein kinase ErbB-1). [Source:Uniprot/SWISSPROT;Acc:P00533]  
AAACAAATATAAAGAAAACCTTAACATAAAATACTGCATATCTCTTTTCAGATTATATATCCCAGAAAGGATATATTTTTCT  
CCTTTCTGGTCTTCCTTTTT

In100 candidate732 (in intron):

LOCUS ENSG00000113569

DESCRIPTION Nuclear pore complex protein Nup155 (Nucleoporin Nup155) (155 ka  
nucleoporin). [Source:Uniprot/SWISSPROT;Acc:O75694]  
AGTTTATGCATTATTACTTTAACTCTGGATTCTGTTCTGTAACCTTCTTGTCTACTTTCTACACTTTGTTCTACCTCAGTT  
ACTGTCTCATCTATCTTTTT

In100 candidate733 (in intron):

LOCUS ENSG00000113569

DESCRIPTION Nuclear pore complex protein Nup155 (Nucleoporin Nup155) (155 ka nucleoporin). [Source:Uniprot/SWISSPROT;Acc:O75694]

GCTTCTTGCCTTGGAAAACTAACTTATCTTTGCTTAACTCTCTAAACCTCTTCTCTCTCTGTAATTTCTGAGCAGTT  
CCTTCCTCTTCATTTATTCT

In100 candidate734 (in intron):

LOCUS ENSG00000108381

DESCRIPTION Aspartoacylase (EC 3.5.1.15) (Aminoacylase-2) (ACY-2).

[Source:niprot/SWISSPROT;Acc:P45381]

AGGAAATTTAAAGAAAAAAGACCACAAGAGTTTCCTATTTCTAACACCACTGATTTTTTCCATGTTCTTTCCCAGTCTTT  
ATTCATCTATGCATCTAACTT

In100 candidate735 (in intron):

LOCUS ENSG00000132932

DESCRIPTION Probable phospholipid-transporting ATPase IB (EC 3.6.3.1) (ATPase class I type 8A member 2) (ML-1). [Source:Uniprot/SWISSPROT;Acc:Q9NTI2]

TTGAGAGTGGACCTAACTCTCATGTAAGTTCTCTGTCTATATCAGTGGTCTCCAAAACCTTTTTCATTGGATGTCCCATT  
GTAACACTTTTTTTTTTCTT

In100 candidate736 (in intron):

LOCUS ENSG00000167723

DESCRIPTION Transient receptor potential cation channel subfamily V member (TrpV3) (Vanilloid receptor-like 3) (VRL-3).

[Source:Uniprot/SWISSPROT;AccQ8NET8]

GGTGAAAAGGGTTAACTCTTTAGGTTCTAATTTTCATTTTCCTGACCACCAGTGATTCCAAACATCTTTCACCTTTGTTTATTCACTGTGTGTATTTTCTC

In100 candidate737 (in intron):

LOCUS ENSG00000082068

DESCRIPTION WD repeat domain 70 [Source:RefSeq\_peptide;Acc:NP\_060504]

TATTTCTCCTTCATTATAACTGCTGAGTGTACTAGTCTTGGGTGGCTTTTTTTTTTTTTTTTTTTCCTTTCAGCACTTTGACAATATCATTTTCATTCTCTT

In100 candidate738 (in intron):

LOCUS ENSG00000082068

DESCRIPTION WD repeat domain 70 [Source:RefSeq\_peptide;Acc:NP\_060504]

AAGCTGGAAGTTATGTAAGCTAACCTGTGGGTTTTTTCTCCTGTAATTTTTTCTTCTGCTTTGAAAGTTCAGGTTTCCCGTCTTGCCTTAAAGGCTTT

In100 candidate739 (in intron):

LOCUS ENSG00000066455

DESCRIPTION Golgin subfamily A member 5 (Golgin-84) (RET-fused gene 5 protein) (Ret-II protein). [Source:Uniprot/SWISSPROT;Acc:Q8TBA6]

GCACTTGATTTTTTAACTAGTTTTTTTTTTTGTGTTGTTGTTGTTTGGCTACAGATCTTATTGATATTTTAGCAATCAATCAATTTTTTTTTTGTGTTTTT

In100 candidate740 (in intron):

LOCUS ENSG00000176826

DESCRIPTION FK506 binding protein 9-like [Source:RefSeq\_peptide;Acc:NP\_87827]

CTGTCTGCCTAACCTCCCTGTCTCCCCTACCCCTTAGAGTTAACCATCTTTATTGGTTTCTATTTTAAATTTTCCAGTG  
TCTGGATTTTTTTTTTTTTTTT

In100 candidate741 (in intron):

LOCUS ENSG00000166532

DESCRIPTION family with sequence similarity 80, member B (FAM80B), mRNA

[Source:RefSeq\_dna;Acc:NM\_020734]

GGTTTGTAGAAAAGTACTGACTTTCTGGCTTCATGGTAACTAATGCCATGGTGTTATTTTAAATGTTTCTTTTTCAGTG  
TTTTTTTTTTCCCCTCTCAA

In100 candidate742 (in intron):

LOCUS ENSG00000166532

DESCRIPTION family with sequence similarity 80, member B (FAM80B), mRNA

[Source:RefSeq\_dna;Acc:NM\_020734]

CCATTAAACCTAGCCTTACCATTAAACATGTCTTTTTTTTTTTTTTTTTTTTTTTAATTCACAAGAGCCAGTATGCTACAAA  
ATTTTGTGCTTTTTCCTT

In100 candidate743 (in intron):

LOCUS ENSG00000109171

DESCRIPTION SLAIN2 protein. [Source:Uniprot/SPTREMBL;Acc:Q8N5R3]



AACCAATAACTTCCCATTCCCTTTGCTTCCTCTCTGCCTGTTTTAGGTTTAGGTTGCCCCAGATCTCTCTTTTGCCTCAT  
GTCTCTCCCTGTTTTGGTGT

In100 candidate744 (in intron):

LOCUS ENSG00000113594

DESCRIPTION Leukemia inhibitory factor receptor precursor (LIF receptor) (LFR)  
(CD118 antigen). [Source:Uniprot/SWISSPROT;Acc:P42702]

TTTTAAACTATGGTAGGTAACATTTCTTTGCCCATCTTTTCCTTCACTTTTTTCATATAGTTCAGGTCATACTGGATATT  
CAGTTTTGTTCCCTTATCTTT

In100 candidate745 (in intron):

LOCUS ENSG00000133958

DESCRIPTION KIAA1409 (KIAA1409), mRNA [Source:RefSeq\_dna;Acc:NM\_020818]

TCATTGTTTGTGCTCTGTGGCTACTGTAACCACTAATTCATATATTTATCTTTCCCTCTATATTCTTACCTTCTCAGGT  
TTGCTTACCCTTTGTGTGTA

In100 candidate746 (in intron):

LOCUS ENSG00000133958

DESCRIPTION KIAA1409 (KIAA1409), mRNA [Source:RefSeq\_dna;Acc:NM\_020818]

GTATATCGGCTTTGAAGTAACTTAGATGTTTATATCTGACTTTCTTCTTTTCTTTTTTTTTTTCCTCCTCTTTCCCAGGG  
TCTATGTCTTTGTCTTGACT

In100 candidate747 (in intron):

LOCUS ENSG00000133958

DESCRIPTION KIAA1409 (KIAA1409), mRNA [Source:RefSeq\_dna;Acc:NM\_020818]

CTGTTAAAAATTTTAACCACTGGGATGGCTCAAATTTTTCCTTTTGACCTCTGAGTGTTCTTTGTAGTTTTCCATCAGTT  
ATTAATATTTTTTCTATTTT

In100 candidate748 (in intron):

LOCUS ENSG00000133958

DESCRIPTION KIAA1409 (KIAA1409), mRNA [Source:RefSeq\_dna;Acc:NM\_020818]

CTTTGTCTAATTAAGATAAACTGAGATGGCAACTAAGATAATTAAGAACTTCCTTCTTTTCAAACATCAGCATTT  
AGTGCTCTAAATTCCTTTC

In100 candidate749 (in intron):

LOCUS ENSG00000145623

DESCRIPTION Oncostatin-M specific receptor subunit beta precursor.

[Source:niprot/SWISSPROT;Acc:Q99650]

AATTGAGCCCTTTATTACATATAACAACCTTTCTTTTTCTCTTTTCTGGTTCTTAACATCTGTTTTATCTAAATACAGCT  
ACTCTCACTTGCTTTTGATT

In100 candidate750 (in intron):

LOCUS ENSG00000138614

DESCRIPTION Uncharacterized protein C15orf44.

[Source:Uniprot/SPTREMBL;Acc:96HX5]

GATGGATGCAAAGTGCTGACTACCACATGTGGCATAAATGCTCATTAAGTGTGATGATGACGTTGTTTCATTCAGCTGTC  
TTCCTTAGCCTGCTTCTGGT

In100 candidate751 (in intron):

LOCUS ENSG00000103534

DESCRIPTION transmembrane channel-like 5 [Source:RefSeq\_peptide;Acc:NP\_07906]

AGCCCTAACAACCATCAATGTTTTTATATTCTTATTTTCATCTACACTTTCTCTTCCCAGCAAATCCCTTATTTTTATTCT  
TAGTATTTATTTATTTTAAT

In100 candidate752 (in intron):

LOCUS ENSG00000132964

DESCRIPTION Cell division protein kinase 8 (EC 2.7.11.22) (EC 2.7.11.23)

(Potein kinase K35). [Source:Uniprot/SWISSPROT;Acc:P49336]

TTTTATCTCCTTTTAGTTTAATTTTTTCTCTTTACTAACTATAGCTTTAGTTGCTTCCATACATTTTTATTGTCAGTA  
ATTCATTATCATTTTTTCC

In100 candidate753 (in intron):

LOCUS ENSG00000132964

DESCRIPTION Cell division protein kinase 8 (EC 2.7.11.22) (EC 2.7.11.23)

(Potein kinase K35). [Source:Uniprot/SWISSPROT;Acc:P49336]

ATCAAGCCTAACAAACATTATATTTATTTTACCTAGTATTTCAATTTAAATCTTTCATGCTTTCTATTTATCTCTCCAGCT  
TTATGTTTTGTCTTCTACTT

In100 candidate754 (in intron):

LOCUS ENSG00000164327

DESCRIPTION rapamycin-insensitive companion of mTOR

[Source:RefSeq\_peptide;cc:NP\_689969]

ATGTATTGCTTATTGTCAAGAATAAACTCGTGTTAAGCATCTCCAAATAACATTTGTGTCACCTACTGTCTTGCTCAGTA  
TTTCTTTTAACCACTGTTTA

In100 candidate755 (in exon):

LOCUS ENSG00000174485

DESCRIPTION C-myc promoter-binding protein (DENN domain-containing protein A). [Source:Uniprot/SWISSPROT;Acc:Q7Z401]

TTCCAAAACAATTCATACTAACAAATGCATCTGTCTTCTTTCTCACTGGCCTTTTTTTGATGCATTCAGGAAGTTTCTGA  
CTTTTCTGTATCGTTATTCC

In100 candidate756 (in intron):

LOCUS ENSG00000109182

DESCRIPTION CDNA: FLJ21511 fis, clone COL05748.

[Source:Uniprot/SPTREMBL;Ac:Q9H720]

AGTAGCAAAGGGGTTTAACAAATGGCCGTCCTTTTCACTCTTTTATTTCTTGAGACATCTTTTAATAGCCCTCAGCTATT  
TTTATCCAATTCAGTCCTGT

In100 candidate757 (in intron):

LOCUS ENSG00000082074

DESCRIPTION FYN-binding protein (FYN-T-binding protein) (FYB-120/130)  
(p120p130) (SLP-76-associated phosphoprotein) (SLAP-130) (Adhesion and  
degranulaion promoting adaptor protein) (ADAP).

[Source:Uniprot/SWISSPROT;Acc:O15117]

TTAACTCCATGCCCTATTTAAGTTTACTTTTTCTCATGTTTTTGCACCCTCATTCCTTTCAACTCAAGTCCACAGTGCCT  
CTTAGCCCTCATTTTGTAT

In100 candidate758 (in intron):

LOCUS ENSG00000077782

DESCRIPTION Basic fibroblast growth factor receptor 1 precursor (EC 2.7.10.)  
(FGFR-1) (bFGF-R) (Fms-like tyrosine kinase 2) (c-fgr) (CD331 antigen).

[ource:Uniprot/SWISSPROT;Acc:P11362]

GGACTAGAGTTTGGCTGGTTAACAAGGGGTACTACCTAATTGCTTTTCTCTGATATTCTCAGCCTCTTTTTCTGGAGGAG  
TATCTCTGTCAGTTTCTTTT

In100 candidate759 (in intron):

LOCUS ENSG00000113600

DESCRIPTION Complement component C9 precursor [Contains: Complement componet  
C9a; Complement component C9b]. [Source:Uniprot/SWISSPROT;Acc:P02748]

TAACTAATTCACCTAATTTGTATTCTAATATTTGTTTCTTTTTTTCAAATCTATTTTAAATAACTTCCAGTTCTTTGCTAA  
AATTTTCAGACTTGTCTCTT

In100 candidate760 (in intron):

LOCUS ENSG00000109184

DESCRIPTION DCN1-like protein 4 (Defective in cullin neddylation protein 1-  
ike protein 4) (DCUN1 domain-containing protein 4).

[Source:Uniprot/SWISSPRT;Acc:Q92564]

TGAGGAGAATGAAGTTAGTTAACACCTTCCTCACCTGCTACTTTCAATTCTTTTGGTTTTTACCCTGCTTTTCAGCTCTG  
CAATCTTTTTCCTGGACCTT

In100 candidate761 (in intron):

LOCUS ENSG00000153071

DESCRIPTION Disabled homolog 2 (Differentially expressed protein 2) (DOC-2)

[Source:Uniprot/SWISSPROT;Acc:P98082]

CCTAAAGCTAGAACCTCACCCATAACACATCTACCTCTTTTTCATTTCTTTTTCCTGCCTTCTCACCTCACAGATGTA  
ACCTTGTTTTTGTGTTGGTTCC

In100 candidate762 (in intron):

LOCUS ENSG00000119698

DESCRIPTION HEAT-like repeat-containing protein isoform 1

[Source:RefSeq\_petide;Acc:NP\_478144]

CCTCTGCATTGAATATTATATAAATGTATAATATATAACATGTTATATATATATTTTCTCTCTGCTTTTATGTGTCAGGT  
TTGTTTCTTTAGTTCTTTTA

In100 candidate763 (in intron):

LOCUS ENSG00000188993

DESCRIPTION

TGCTTTTAAAGAGATTTAAATATAAGAAAAAATATTTAACCTACATAAATTTCTGGAGCTCTTGTTTCCTTACTCCAGAC  
TTCTATCTGGTTTCATTTTT

In100 candidate764 (in intron):

LOCUS ENSG00000163071

DESCRIPTION Spermatogenesis-associated protein 18.

[Source:Uniprot/SWISSPRO;Acc:Q8TC71]

CACCTTTTAAAGAAAGTGAAGTGAAGTGGCCTAGAGGGACTAACACCCTTTTTATTCTTATTCTCCATTAATTCAGCTAAC  
TTACAGTAGTTTTTCTTTCT

In100 candidate765 (in intron):

LOCUS ENSG00000165682

DESCRIPTION C-type lectin domain family 1 member B (C-type lectin-like  
recetor 2) (CLEC-2). [Source:Uniprot/SWISSPROT;Acc:Q9P126]

AGTAAAGCTTTATTGGAAAAGTGTCATTTGTACTATAACCTCCACACATTTTCTTTTCTCTCTGTTACTTTGTCACAGTT  
ATTTATTTCGATTATTTTTTA

In100 candidate766 (in intron):

LOCUS ENSG00000168615

DESCRIPTION ADAM 9 precursor (EC 3.4.24.-) (A disintegrin and  
metalloprotease domain 9) (Metalloprotease/disintegrin/cysteine-rich protein 9)  
(Myelom cell metalloproteinase) (Meltrin gamma) (Cellular disintegrin-related  
protin). [Source:Uniprot/SWISSPROT;Acc:Q13443]

CAACTTTATCTTCTAACTCTTTTATTGCGGTTTTCATTTTCAGGCACTATGATTTTAGTTTTTCAGAAACTCTTTTATATTC  
TCTGAGTTTTTTTCCCACTT

In100 candidate767 (in intron):

LOCUS ENSG00000184178

DESCRIPTION Sec1 family domain-containing protein 2 (Syntaxin-binding proten  
1- like 1). [Source:Uniprot/SWISSPROT;Acc:Q8WU76]

TTTCTCTTGTTTTGTAAACCAAGATTTTATATCTTTCTTGAAGGCTTTTTTTTTTTTTTTTTTGGCATTTCCTTCCCAGAT

TGAGTTTAACTTCTTCCCA

In100 candidate768 (in intron):

LOCUS ENSG00000184178

DESCRIPTION Sec1 family domain-containing protein 2 (Syntaxin-binding protein 1-like 1). [Source:Uniprot/SWISSPROT;Acc:Q8WU76]

AAAGCTTTGCTGGGTGTAGTATTCTTCACTAACGGTTTGTGTTGTTTTTTCATATTTTCCTTTCAGCACTTTGAATA  
TATCATCCCATTATCTCCTT

In100 candidate769 (in intron):

LOCUS ENSG00000184178

DESCRIPTION Sec1 family domain-containing protein 2 (Syntaxin-binding protein 1-like 1). [Source:Uniprot/SWISSPROT;Acc:Q8WU76]

TGTGGTTTGTGTTGCTTTTACTGTTTGTTTGCTTTAACCTCTGTTCTATTCTCTTTTATCTTAGGAATTCCAGTTCTC  
ATTGTAGGCATCATCTTTCT

In100 candidate770 (in intron):

LOCUS ENSG00000197140

DESCRIPTION ADAM 32 precursor (A disintegrin and metalloproteinase domain 3).  
[Source:Uniprot/SWISSPROT;Acc:Q8TC27]

GTTTCTTAACTGGGTTCTTCATGTATTACATCTTCTACCTCTCTATCTGACATTGTTTCACTTCCTTATATCAGTTTCC  
AAATCCTCCGTTTTCTTAAT



In100 candidate771 (in intron):

LOCUS ENSG00000132357

DESCRIPTION Caspase recruitment domain-containing protein 6.

[Source:Unipro/SWISSPROT;Acc:Q9BX69]

CAACTTTTGCCTTTAACATGTTATGGATGCCATTCCTCTGTCTTTTAGCTTCCATTGTTTCTGATGCTAAATCTTCAGTC  
ATTTTATCATTGATCCTCTG

In100 candidate772 (in intron):

LOCUS ENSG00000103599

DESCRIPTION IQ motif containing H isoform 1

[Source:RefSeq\_peptide;Acc:NP\_01026885]

TTGTTGCTTATAGACTTAACTAATTTCAAAAATAATCTTTATGGTGCTTTTCACTTGTGTCACTTCCCTCAGTCATTTAA  
ATTTTTTTAGAATCTTTTTTTT

In100 candidate773 (in intron):

LOCUS ENSG00000074755

DESCRIPTION zinc finger, ZZ type with EF hand domain 1

[Source:RefSeq\_peptide;Acc:NP\_055928]

CTTTTTTTTTTCTTATACATCTTTTTATTTTCTTTGGAGTTAACAATTGAATACATACTTTAATTTTCCTAATTTTCAGTC  
TTTTATCATTAATTTAGTCC

In100 candidate774 (in intron):

LOCUS ENSG00000197475

DESCRIPTION

TAGATGCCTTGAGACTTCCTACATAGACACGTCTTTAACAATATAGACAATTTTCCTTCTTCATTTTCAACCAGTATGT  
AAGTCTGCTTTTCATTTCTT

In100 candidate775 (in intron):

LOCUS ENSG00000169902

DESCRIPTION Protein-tyrosine sulfotransferase 1 (EC 2.8.2.20) (Tyrosylproten sulfotransferase-1) (TPST-1). [Source:Uniprot/SWISSPROT;Acc:O60507]

ATTGATTCTTACCTGTGTTATATTCATTCTGCTGTTGAGCTAACCCACCGAGTTATTATTTTGGTTGTTTTTCAGTTCTA  
TAATTTTTATTGGGTTTTTT

In100 candidate776 (in intron):

LOCUS ENSG00000169902

DESCRIPTION Protein-tyrosine sulfotransferase 1 (EC 2.8.2.20) (Tyrosylproten sulfotransferase-1) (TPST-1). [Source:Uniprot/SWISSPROT;Acc:O60507]

ATAGCTAACTGTGGCTTTTCTCATTTATTTGTTTTGTTTTGTATATTTATATGATTTCTGTATTTTATCAGTTCTATAA  
AATTCTCGACCATTTTTCTT

In100 candidate777 (in intron):

LOCUS ENSG00000104755

DESCRIPTION ADAM 2 precursor (A disintegrin and metalloproteinase domain 2)(Fertilin subunit beta) (PH-30) (PH30). [Source:Uniprot/SWISSPROT;Acc:Q9996]

ATTAACAAGTTGCATTGCCTTAGCTTTTTACTTTTAAGGAATTTTATTTATTTTTATTATTTTTTTGTTTTTTCTTCAGTT  
TTTCTGTTTTAGTTTTTTTA

In100 candidate778 (in intron):

LOCUS ENSG00000185722

DESCRIPTION Ankyrin repeat and FYVE domain-containing protein 1 (Ankyrin repeats hooked to a zinc finger motif). [Source:Uniprot/SWISSPROT;Acc:Q9P2R3]

EXON

GTGAACTACTTCAAAAGGTTCCAATTAAAAGTTTGCTTTTAACTTTTCCTCCTAGATTTTGCTCTCTCACAGCCTAATTT  
CACAGTTTCTAGTGTTCCCT

In100 candidate779 (in intron):

LOCUS ENSG00000182836

DESCRIPTION phosphatidylinositol-specific phospholipase C, X domain containing 3 [Source:RefSeq\_peptide;Acc:NP\_001005473]

TTCTGAAGGCATGTTTCTGCACTTCACTTTATATGGCTTACACCTAACTTTATACTTCCCATTTTCTCATTCCATCAGAG  
TTTATGTACTCCCTTTTCTCT

In100 candidate780 (in intron):

LOCUS ENSG00000154710

DESCRIPTION BTB/POZ domain-containing protein KCTD7.  
[Source:Uniprot/SWISSPOT;Acc:Q96MP8]

TGGTAATATGGTCCATGTTCTTAAGTTTACTTCGTCTAACATTGGTACAACCACTTAAGCTCTTTTTCATTGTTTCAGAG  
TATGCTTTTCCTTTCATTAG

In100 candidate781 (in intron):

LOCUS ENSG00000083720

DESCRIPTION Succinyl-CoA:3-ketoacid-coenzyme A transferase 1,

mitochondrialprecursor (EC 2.8.3.5) (Somatic-type succinyl CoA:3-oxoacid  
CoAtransferas)

(Scot-S). [Source:Uniprot/SWISSPROT;Acc:P55809]

AGAGCACCTCTGCATTTAACTTGTAACCTCTCTTATTGCTTATTGTCTCCCCCTTTTATTTTCTAGACTTCCACAGCTG  
CTTTTTTTTTTTTTTCCCTCT

In100 candidate782 (in intron):

LOCUS ENSG00000083720

DESCRIPTION Succinyl-CoA:3-ketoacid-coenzyme A transferase 1,  
mitochondrialprecursor (EC 2.8.3.5) (Somatic-type succinyl CoA:3-oxoacid  
CoAtransferas)

(Scot-S). [Source:Uniprot/SWISSPROT;Acc:P55809]

CTTAGATCACTGATTTGAAACCTTTTTTCTCTAATATAAGCAAGTAACATCCTACAAATTTTATGTTGTTTCAGTCTCT  
TCAAAATACTTTCTAATCTT

In100 candidate783 (in intron):

LOCUS ENSG00000144560

DESCRIPTION Transcription cofactor vestigial-like protein 4 (Vgl-4).  
[Source:Uniprot/SWISSPROT;Acc:Q14135]

CACTTTAGAAAAGTTAAGTCTAAAAATAATGCTCAATATAACATGGCCTTTGGATCGTTTTTCTGCCAGCTCTTCTGTAG  
TGTTCATTAAGTACTTCCTT

In100 candidate784 (in intron):

LOCUS ENSG00000165061

DESCRIPTION zinc finger, matrin type 4 [Source:RefSeq\_peptide;Acc:NP\_078921  
TTATTTTGGCCTCTTCACCTTCCAAATCCTTCCTTCACTGTCCACCTAACTGTTTCATGTCTTTTGTTTCCTTCCAGCTCT  
TCCCTGATGCTGGTCTTCTT

In100 candidate785 (in intron):

LOCUS ENSG00000165061

DESCRIPTION zinc finger, matrin type 4 [Source:RefSeq\_peptide;Acc:NP\_078921  
AGCTCCTGGATTCATTAACCTTTTTGAAGGGTTTTTTGTGTCTCTATTTCTTCAGTTCTGCTCTGATTTTAGTTATTTCT  
TGCCTTCTTCTAGCTTTTGA

In100 candidate786 (in intron):

LOCUS ENSG00000165061

DESCRIPTION zinc finger, matrin type 4 [Source:RefSeq\_peptide;Acc:NP\_078921  
TCACCCTACTTAAAATTGCAAATTCCTGCTTCCGCATCCTTCATAACACTTCTCCTGCTTTGTTTTTCTTCACAGCCCTT  
ATCATTTTCCAATGTCCTAT

In100 candidate787 (in intron):

LOCUS ENSG00000033800

DESCRIPTION E3 SUMO-protein ligase PIAS1 (Protein inhibitor of activated STT  
protein 1) (Gu-binding protein) (GBP) (RNA helicase II-binding protein) (EAD/H  
box-binding protein 1). [Source:Uniprot/SWISSPROT;Acc:O75925]  
AGCTTCACTGCTAGTTGAGGATGCGTTTTTCTTTGGTAACTTTGTTACCACTCATATATTTGCTTTCCAGTTTCTACACT  
TTTTGTTGCCCTCCTATTTT

In100 candidate788 (in exon):

LOCUS ENSG00000106609

DESCRIPTION CDNA FLJ10099 fis, clone HEMBA1002462 (C7orf42 protein)

(Chromoome 7 open reading frame 42). [Source:Uniprot/SPTREMBL;Acc:Q9NWD8]

GTGTTTGTGGCTTAATAATCATAGTAACAACAATAATACCTTTTTCTCCATTTTGCTTGCAGGAAACATACCTTAAGTTT  
TTTTTGTTTTGTTTTTGTTT

In100 candidate789 (in intron):

LOCUS ENSG00000157152

DESCRIPTION Synapsin-2 (Synapsin II).

[Source:Uniprot/SWISSPROT;Acc:Q92777]EXON

TTTAACAAACTGTCAATTGGCTACATCCTTAGTATTCTCTCCTGAATACACTTTTTTATTCTTTGCCTTTCAGGCTGAG  
AGTTTTCCACATCTTTCCTT

In100 candidate790 (in intron):

LOCUS ENSG00000158486

DESCRIPTION dynein, axonemal, heavy polypeptide 3

[Source:RefSeq\_peptide;Ac:NP\_060009]

ATCTGTGGGTTAATAATCCATCATGAATCAATTGCCATTAACTTGCCAAGAACTTTTTTCAATTTTCAGTTTGAAGTTTC  
ACTCTTCTGTGTGCTTATTT

In100 candidate791 (in intron):

LOCUS ENSG00000158486

DESCRIPTION dynein, axonemal, heavy polypeptide 3

[Source:RefSeq\_peptide;Ac:NP\_060009]

TAACAATATTGAGTCTTCCTATCCATGATTATGGAATATCTCTCCATTATTTATATCTTCTTTGATTTCTTTCATCAGAG  
TTTTTTGTAGTTTTCCTCAT

In100 candidate792 (in intron):

LOCUS ENSG00000167670

DESCRIPTION Chromatin assembly factor 1 subunit A (CAF-1 subunit A) (Chromatin  
assembly factor I p150 subunit) (CAF-I 150 kDa subunit) (CAF-Ip150).

[Source:Uniprot/SWISSPROT;Acc:Q13111]

CTTTTTTTTTCTTTGCCTGATCTGTAAAGTTTTTTTTTAACATAGTCTAGTATTTTCATTCTCCGTGATATTTTCGTCTCAGCC  
TGTTACCTCTTTGTTTACAG

In100 candidate793 (in intron):

LOCUS ENSG00000198874

DESCRIPTION radical S-adenosyl methionine and flavodoxin domains 1

[Source:efSeq\_peptide;Acc:NP\_060734]

AGCTGTAACAATCAATTTTATATTTGCCCATATATTTACCTTTACTATGATCTTTACTTCTTCATGCAGCTTCAAATTAC  
TGTCTAGTGCCCTTTCATTT

In100 candidate794 (in intron):

LOCUS ENSG00000132170

DESCRIPTION Peroxisome proliferator-activated receptor gamma (PPAR-gamma).

Source:Uniprot/SWISSPROT;Acc:P37231]

AAATTGGCACAAGTATCAAGGAAAGCTGGTACAACCTTAATCTTAACCTGGAATCAACTCCTTTAATTTTTACATACAGAT  
TTGGTTCCGTTTTTTAGATT

In100 candidate795 (in intron):

LOCUS ENSG00000158321

DESCRIPTION Autism susceptibility gene 2 protein.

[Source:Uniprot/SWISSPROTAcc:Q8WXX7]

CTCATTGTGGTTTTTAAGTTGTATTTCCCTAATGACTACTGATGTAACTATTGTTTTATGTATTCATTCACCTTCCAGAC  
AGATATCTTTTTTTTTTTTTT

In100 candidate796 (in intron):

LOCUS ENSG00000158321

DESCRIPTION Autism susceptibility gene 2 protein.

[Source:Uniprot/SWISSPROTAcc:Q8WXX7]

TAACACCAAGCTGCGGATCCTCATCCTTGAATCTTTTTCTTCTAGACGTGATCTGACTTTTCTATTCTGTGTCCTCAGAA  
TTATTCTTTGTATTTCTTTC

In100 candidate797 (in intron):

LOCUS ENSG00000158321

DESCRIPTION Autism susceptibility gene 2 protein.

[Source:Uniprot/SWISSPROTAcc:Q8WXX7]

TGCCATAGCTGAAGACCATCTAGTACCCTCTTTAACTTTTGCCACTTTGGAGTTTCCTCTCTACCGTTACTTATTCAGCA  
GGTTTTTGTGTTTTGTTTTT



In100 candidate798 (in intron):

LOCUS ENSG00000066739

DESCRIPTION Uncharacterized protein C14orf103.

[Source:Uniprot/SWISSPROT;Ac:Q96BY7]

TTAAACGTTCTTTTACTAATAGTTATAACCTTTTACCCAAATTACCCAATTTTCTCAGGTGACATGTTTCATCTACCCA  
TTTATTATTGCATTTTCATTT

In100 candidate799 (in intron):

LOCUS ENSG00000066739

DESCRIPTION Uncharacterized protein C14orf103.

[Source:Uniprot/SWISSPROT;Ac:Q96BY7]

TCCCCATCTAATTGCACCCCCCTTATTTGCACATAGTAACCTGGTTCCAAATTCGTCTCTCTTTCAATTCTCTGGCAGGA  
ATTCCTTTTCTTCTAGCTT

In100 candidate800 (in intron):

LOCUS ENSG00000078902

DESCRIPTION Toll-interacting protein.

[Source:Uniprot/SWISSPROT;Acc:Q9H0E2]EXON

TGCTGCACCCATTGACTCGTCATTTAACATTAGGTATTTCTCCTAAACAATTCCTATTTTTTTCCTTGGGTCAGAATCC  
CTTATGAATGTTATTTTTTC

In100 candidate801 (in intron):

LOCUS ENSG00000183166

DESCRIPTION Calneuron-1 (Calcium-binding protein CaBP8).

[Source:Uniprot/SWSSPROT;Acc:Q9BXU9]

AATTCTGTAAATATATCATCTTTGAGATCTCTAACTTTATATATTTTTTTATCTCTTTTTTCGTAACTGACTTTCAGAT

GATTTTCCTTATACATCTAT

In100 candidate802 (in intron):

LOCUS ENSG00000183166

DESCRIPTION Calneuron-1 (Calcium-binding protein CaBP8).

[Source:Uniprot/SWSSPROT;Acc:Q9BXU9]

TACAAAGTAATGAGACTTAACCACATTTTATGCTTCGTCATTTGCCATTTTATCAGCATCATCCTTGATCCATTTTCCTC

CTCAGTACGTTTCTATTGAT

In100 candidate803 (in intron):

LOCUS ENSG00000188463

DESCRIPTION MGC87315 protein (Fragment). [Source:Uniprot/SPTREMBL;Acc:Q3KQX]

TTCCATTATTTCTTTCTTAACCTGTATGTAATTTTATCACACATTTTACTTTTACTTTTGTTTTTTGGTTGAGTCAGGT

CTTGCTCTTTTGCCTAGGCT

In100 candidate804 (in intron):

LOCUS ENSG00000188463

DESCRIPTION MGC87315 protein (Fragment). [Source:Uniprot/SPTREMBL;Acc:Q3KQX]

AGCTATAACAATCAATTTTATATTTGCCCATATATTACCTTTACTATGATCTTTACTTCTTCATGCAGCTTCAAATTAC

TGTCTAGTGCCCTTTCATTT

In100 candidate805 (in intron):

LOCUS ENSG00000060140

DESCRIPTION Tyrosine protein-kinase STYK1 (EC 2.7.10.2)

(Serine/threonine/tyrosine kinase 1) (Novel oncogene with kinase domain) (Protein PK-unique). [Source:Uniprot/SWISSPROT;Acc:Q6J9G0]

AACCATCATCACTGTTGCTGTAAACATTCTAATATATTTTTCTTTGGGCTTCCCCTACACAGGTGTTTTTCCCAGTCAATT  
TCATTGTACTCTTGCCATAT

In100 candidate806 (in intron):

LOCUS ENSG00000196313

DESCRIPTION nuclear pore membrane protein 121

[Source:RefSeq\_peptide;Acc:NP742017]

AGAAGTCTGACATAAAAATTAACCTGAGACTTTTATGTTCAATCTTTTTATCTTCCAGTTTCTTTCCTTCCTTGCTTTAA  
AAATACCTTGGACTTATTTT

In100 candidate807 (in intron):

LOCUS ENSG00000132155

DESCRIPTION RAF proto-oncogene serine/threonine-protein kinase (EC 2.7.11.1

(Raf- 1) (C-RAF) (cRaf). [Source:Uniprot/SWISSPROT;Acc:P04049]

GTTGAAGCTGATAGTGATTGAACATATTTAGTTTAACTTAGTTAATGACTTTTAAATTTTTTTTTTATTTTTTTCAGAACAA  
TGCAAACCTTTTTTTTTTTTTTT

In100 candidate808 (in intron):

LOCUS ENSG00000100749

DESCRIPTION Serine/threonine-protein kinase VRK1 (EC 2.7.11.1) (Vaccinia-related  
kinase 1). [Source:Uniprot/SWISSPROT;Acc:Q99986]

GTTAATCATGAGTCTAACGTATTTTGTGTTTTTTGTTTGTGTTATCCATGTCCTTTCTCTTGACTTTATGTTTCAGAG

TATATGCTCAATCTTTTTTT

In100 candidate809 (in intron):

LOCUS ENSG00000197006

DESCRIPTION methyltransferase like 9 isoform 1

[Source:RefSeq\_peptide;Acc:N\_057109]

CATGTCTGCCTTAACACTTTCAATTCTGCCTTTCACCTTTCACCTTATATAAGCCTTGCAGCTTTGAGACCTTCAT

CTTTTTACAAGCCATTTTTC

In100 candidate810 (in intron):

LOCUS ENSG00000134851

DESCRIPTION Transmembrane protein 165 (Transmembrane protein TPARL)

(Transmmbrane protein PT27). [Source:Uniprot/SWISSPROT;Acc:Q9HC07]

AGTTTTATAAACCAAACCTTCTAACTAGGGGATTTGCTGCTTTTTCACCTTACTTTAGTATGTTGTTATCTGGCTTCAGTC

CTTGCCTTTTCCTTGAAATT

In100 candidate811 (in intron):

LOCUS ENSG00000155719

DESCRIPTION Otoancorin precursor. [Source:Uniprot/SWISSPROT;Acc:Q7RTW8]

ACTCCTTTCCCTAAGATAACACCAATGGGTACTTTTGGATATATTCTTTCAGTCTAAGTATTTTATTTGTTTATTAATTT

ATCCATCCATCCATCCATCC

In100 candidate812 (in intron):

LOCUS ENSG00000134852

DESCRIPTION Circadian locomoter output cycles protein kaput (hCLOCK).

[Source:Uniprot/SWISSPROT;Acc:O15516]

AAAAGTTAACTTTTAGTTTAATTGACTGCCTGTGGTTTTCTTATTTCCGCCCTGGTCTTTATTTTCCTTTCCTCAGCTTAC  
TTTTGGGTTTAATTTGTTTT

In100 candidate813 (in intron):

LOCUS ENSG00000134852

DESCRIPTION Circadian locomoter output cycles protein kaput (hCLOCK).

[Source:Uniprot/SWISSPROT;Acc:O15516]

GATTTTGGGCTGTGCTTCGCTTAGTTCTGTTTAACTTAACACACTTGGGTCTGCTTTCTGTTCTCCAGAAATCTATTGT  
AAACACTTTCTCTCTGTTCT

In100 candidate814 (in intron):

LOCUS ENSG00000090061

DESCRIPTION Cyclin-K. [Source:Uniprot/SWISSPROT;Acc:O75909]

AAGAGCTTTCTTTCTAAGGTAACTTTCTTGCTGTGCTTTTTATTATCCCTTGACCAGTTAGCCTCCCTTGTTCTGACTC  
CTCTAGTGATTCCTTTTTGT

In100 candidate815 (in intron):

LOCUS ENSG00000132182

DESCRIPTION Nuclear pore membrane glycoprotein 210 precursor (POM210) (Nucllar  
pore protein gp210). [Source:Uniprot/SWISSPROT;Acc:Q8TEM1]

AGATTAACTCTTTATATTTTCTTTTCTGTTGGGTTTCCTTCCTTACAGTAATTTTTTCTTCTTTGGTATTTTTATTTCCT  
TTATGTCTGCCTCTCTTCTT

In100 candidate816 (in intron):

LOCUS ENSG00000090989

DESCRIPTION Exocyst complex component 1 (Exocyst complex component Sec3).

[source:Uniprot/SWISSPROT;Acc:Q9NV70]

TTGTTTTGGTTGTTTTTTGAAAGATTTATTTTGATAACTACTCTCTGCCTTTTGTTTCCCCCTTTGGTTCTACAGAGACC  
TCATGATTCTATCTACTTTT

In100 candidate817 (in intron):

LOCUS ENSG00000137821

DESCRIPTION Leucine-rich repeat-containing protein 49 (Tubulin polyglutamylse  
complex subunit 4) (PGs4). [Source:Uniprot/SWISSPROT;Acc:Q8IUZ0]

AGATTCATAACTTTCATTTATTTATTTATTTATTTATTTAATTTTCTTTTATTTATTTATTTATTTTGAACAGAGTTT  
CACTCTTGTTGCCTATGCTG

In100 candidate818 (in intron):

LOCUS ENSG00000187720

DESCRIPTION thrombospondin, type I, domain containing 4

[Source:RefSeq\_peptide;Acc:NP\_079093]

TATGATACAATTTTTATAAACTTTTATAACCTCTTAAAGTTTTATTTTATTCTTTTTCAACTTTTTATATTTATTCAGTT  
TTATCTATAACCATCTTTT

In100 candidate819 (in intron):

LOCUS ENSG00000187720

DESCRIPTION thrombospondin, type I, domain containing 4

[Source:RefSeq\_peptide;Acc:NP\_079093]

GGGTACATTTATGAAAATTAAGAAACCAACCTTGGTACGTTACTATTAATAAATTCTAGACTTTCTTTGGTTTTTCAGCA  
GTTTTTCCATTGCCATCCTT

In100 candidate820 (in intron):

LOCUS ENSG00000187720

DESCRIPTION thrombospondin, type I, domain containing 4

[Source:RefSeq\_peptide;Acc:NP\_079093]

GCTTCTGTTATGGTAACTACTTCTACAATTTTTATTGATTTCTTCTTGCCACTTTTTGCTTGTAGTTGCAGCCTTCAAAA  
CTATCTTCTTCTAATCCTTT

In100 candidate821 (in intron):

LOCUS ENSG00000174799

DESCRIPTION Centrosomal protein of 135 kDa (Cep135 protein) (Centrosomal  
protein 4). [Source:Uniprot/SWISSPROT;Acc:Q66GS9]

CCCACAAAGACATAACTAAAAAAAATTCTACTCTTTATCTCCCTCGCATTTTGACTTGTGGTTGTCTTAATTTACAGAT  
TTGTATATTGCCTATCTCTT

In100 candidate822 (in intron):

LOCUS ENSG00000106635

DESCRIPTION B-cell CLL/lymphoma 7 protein family member B.

[Source:Uniprot/SWISSPROT;Acc:Q9BQE9]

ACTGCTTTATTTCTTAACCTTTCTCTCATTCATTTCTTGTCTTTCCTGGTGCATTCTGAGTTTCTCAACGCAGTT

TTTGCTCATTAATCTTTTAT

In100 candidate823 (in intron):

LOCUS ENSG00000106635

DESCRIPTION B-cell CLL/lymphoma 7 protein family member B.

[Source:Uniprot/WISSPROT;Acc:Q9BQE9]

AGCTAGTAACTGTTGGAATGAATGTCACTTTAAGTCCTTCTATTTTCAGCATTTATGCTGTCTGCATTACATGCTAAAT

TTTTTCTTTTCTTTTTTTT

In100 candidate824 (in intron):

LOCUS ENSG00000066933

DESCRIPTION myosin IXA [Source:RefSeq\_peptide;Acc:NP\_008832]

GGGTATCGCTGGGTCATATTGTTAAGAGTGTGTTTAACTTTCTGTGAATGTTTTACTTTTTGTTAGATTGTCTTCCAGAG

TTGTTCTACCATTTTGCATT

In100 candidate825 (in intron):

LOCUS ENSG00000066933

DESCRIPTION myosin IXA [Source:RefSeq\_peptide;Acc:NP\_008832]

GAATTTGCTTTTTGTAAACGCTTTTAAGTCTTTTTTTTGCCTTAGGCCTTTAGTTTTTAACAGTAGTTTGTCTAGGTATAG

ACTTCTTTTTATTCTTTCT

In100 candidate826 (in intron):



LOCUS ENSG00000152520

DESCRIPTION PABP1-dependent poly A-specific ribonuclease subunit PAN3

[Source:RefSeq\_peptide;Acc:NP\_787050]

TAGTTTTCCCCTAACCTATACTACATACTTCCATCTCATATTTTCCTATCTAGGCACATTTATTCTTCCTTCAGAACTTT  
ACTCAGGCATTCACTTTTCT

In100 candidate827 (in intron):

LOCUS ENSG00000152520

DESCRIPTION PABP1-dependent poly A-specific ribonuclease subunit PAN3

[Source:RefSeq\_peptide;Acc:NP\_787050]

TTTtagggtagaattgacatctttataacaaatgagtgtttattcccctttgtttaagtaatctgttatttctgtcagta  
ggttttttatgttttcttcat

In100 candidate828 (in intron):

LOCUS ENSG00000128059

DESCRIPTION Amidophosphoribosyltransferase precursor (EC 2.4.2.14) (Glutamic  
phosphoribosylpyrophosphate amidotransferase) (ATASE) (GPAT).

[Source:Unirot/SWISSPROT;Acc:Q06203]

AGTTACCTAACTCCGGGCAAGTTTTCATTTACTTTTCAGTGTTACTCTCACTCTTTTTTCTTTCTTCTTTTAAAATAT  
AAACTCTAGCTCCTGCAGGA

In100 candidate829 (in intron):

LOCUS ENSG00000128059

DESCRIPTION Amidophosphoribosyltransferase precursor (EC 2.4.2.14) (Glutamic  
phosphoribosylpyrophosphate amidotransferase) (ATASE) (GPAT).

[Source:Unirot/SWISSPROT;Acc:Q06203]

GTAATCTTTGTCCTCTTAACCCCATTCACATTTGGTACTTTTATTATACTATTTACTGTTTTCTCTCAGGTGTTAAATTT  
ATTTGCAGTTCTGTCCTTTT

In100 candidate830 (in intron):

LOCUS ENSG00000121380

DESCRIPTION Apoptosis facilitator Bcl-2-like 14 protein (Apoptosis regulator  
Bcl-2). [Source:Uniprot/SWISSPROT;Acc:Q9BZR8]

ACTCAAGCTTTTTCTAACTGTAATTCTGTATTTTTTAGCAAATCTCTTCTTATCTCTTCCTTCCCAGCCTCTAGTATCCC  
CTATTCTACTCTTTACTTTT

In100 candidate831 (in intron):

LOCUS ENSG00000164588

DESCRIPTION Potassium/sodium hyperpolarization-activated cyclic nucleotide-gated  
channel 1 (Brain cyclic nucleotide-gated channel 1) (BCNG-1).

[Source:niprot/SWISSPROT;Acc:O60741]

TAATACCTACTCCTAATCATATTTTTTTAACTTTCTTTGAACTTACTCTTCTGTTTCCTTTTCTAACATCTCAAATCAGAT  
GCTTAGTTTATTAATTTCTC

In100 candidate832 (in intron):

LOCUS ENSG00000070018

DESCRIPTION Low-density lipoprotein receptor-related protein 6 precursor.

[Source:Uniprot/SWISSPROT;Acc:O75581]

TTAAGATGGTGAAATGCCAAGTAACTTAGTTTTAACTACTCTTTATTTTTCATTTGTGTTACTTGTCTTTTTTGGCAGCT  
TTCTCAGTTCTCTCTCTGTT

In100 candidate833 (in intron):

LOCUS ENSG00000151883

DESCRIPTION Poly [ADP-ribose] polymerase 8 (EC 2.4.2.30) (PARP-8).

[Source:niprot/SWISSPROT;Acc:Q8N3A8]

TTCCAATAACCCTATTAACCTCCTCAATTTTACCTCTTCCTTTTTTAGCTGTGTTCCATCATTTGCCAATGGCAGCT  
CAGCTTCTTTGTTCTTTTAT

In100 candidate834 (in intron):

LOCUS ENSG00000151883

DESCRIPTION Poly [ADP-ribose] polymerase 8 (EC 2.4.2.30) (PARP-8).

[Source:niprot/SWISSPROT;Acc:Q8N3A8]

ATAAACATATTGAAAGAGTGATAAAAAGGCTTTTAAACATTGAGCTCCATCTTCCTTTTTTACGGCGGTTTTATTTTCAGAT  
CCCATTTGGATGTTTATCTT

In100 candidate835 (in intron):

LOCUS ENSG00000165714

DESCRIPTION LOH1CR12 [Source:RefSeq\_peptide;Acc:NP\_477517]

TTTTATCAATTGAGAGTGAGGTACTGAATTATTAACCTGTTTTGTTGAATTGTGTATTTTTCCTTTTGATTCTGTCAGTT  
TTCCTTCATTTGTTTTGAG

In100 candidate836 (in intron):

LOCUS ENSG00000165714

DESCRIPTION LOH1CR12 [Source:RefSeq\_peptide;Acc:NP\_477517]

CATCTTAATATTAAATCTTCCAATCAATGACTATGGGGTGTCTTAACATTTGTATGTGTCCTCTTTAATTCCTTTCAGCT

GTATTTTATGGTTTTTTTA

In100 candidate837 (in intron):

LOCUS ENSG00000111266

DESCRIPTION Dual specificity protein phosphatase 16 (EC 3.1.3.48) (EC 3.1.316) (Mitogen-activated protein kinase phosphatase 7) (MAP kinase phosphatase 7) (MKP-7). [Source:Uniprot/SWISSPROT;Acc:Q9BY84]

TCTTAGTAGATACAACACACTTGTGGGGTTGGAAAAATGTATAATATTAACATTAATAGTAATCTTTCTTGTTACAGGATTTCTTTTCATTTCTTTGCC

In100 candidate838 (in intron):

LOCUS ENSG00000160633

DESCRIPTION Scaffold attachment factor B (Scaffold attachment factor B1) (SFB) (HSP27 estrogen response element-TATA box-binding protein) (HSP27 ERE-TATA binding protein). [Source:Uniprot/SWISSPROT;Acc:Q15424]

ATTAGTGTAACAAACGTCCGGGTCCAAAGAGAGAGTGAGTATTAATTTTCTAACTAGGGTATTTTGCTCTTCTTTTCAGTTGTATTTCTGTGTGCGTCTT

In100 candidate839 (in intron):

LOCUS ENSG00000168575

DESCRIPTION solute carrier family 20, member 2

[Source:RefSeq\_peptide;Acc:N\_006740]

TATCATTGTGTTCTATGAATAGGACCATAATTATGAATGAATTTTAACATTCATTAGATTTTTTTTTTTAATTATTCAGTT  
GCTTCTTGGTTTATATCTCC

In100 candidate840 (in intron):

LOCUS ENSG00000164171

DESCRIPTION Integrin alpha-2 precursor (Platelet membrane glycoprotein Ia)  
GPIa) (Collagen receptor) (VLA-2 alpha chain) (CD49b antigen).

[Source:Unipot/SWISSPROT;Acc:P17301]

ACATCTAACACAAAAGGATCTCTGGTCACCTTTACTCACTTCTTTTAACTTTATTTTGCTCAGATAGTCAATGTTAATCA  
CTCTGTTGCTCCTTCCCTTT

In100 candidate841 (in intron):

LOCUS ENSG00000131379

DESCRIPTION Uncharacterized protein C3orf20.

[Source:Uniprot/SWISSPROT;Acc:8ND61]

TAACATGAAGTATGTCTGTATTTCTTGTTCTCTGTTCTGTATATTTTCATCTTTTTTTTTTCCCTTTTGGTCAGCCTAGGTA  
TTTTCTACTGACCTGTCTTC

In100 candidate842 (in intron):

LOCUS ENSG00000137817

DESCRIPTION Poly [ADP-ribose] polymerase 6 (EC 2.4.2.30) (PARP-6).

[Source:niprot/SWISSPROT;Acc:Q2NL67]

TACATCATTTCTCACCCTCCTCTGCAATTCATCTCTATGCAACTAACACACACTACCTTATCTTTCCTTCAGGCC  
TTCTGTATCCTATTACTTCT

In100 candidate843 (in intron):

LOCUS ENSG00000120925

DESCRIPTION ring finger protein 170 [Source:RefSeq\_peptide;Acc:NP\_112216]

CTTAACACGTGGAGTATTGAGCTGATTCCCTCCTTGACATAGTCTGTTCTTTTCTCAGTTTTGATTCCTCCTCTTCTTC  
ATTCCTCTCATCTGGTCTAT

In100 candidate844 (in intron):

LOCUS ENSG00000177463

DESCRIPTION Orphan nuclear receptor TR4 (Orphan nuclear receptor TAK1).

[Source:Uniprot/SWISSPROT;Acc:P49116]

AAAGATTTATTGTTATCTCAACAAGCTGAATCAAAAAGCCAATTATAACGGTTGATTTCTCTGTTTTTCTTCTTGCAAGTT  
TTATCAGTTTTTTTGGCTCA

In100 candidate845 (in intron):

LOCUS ENSG00000132938

DESCRIPTION Uncharacterized protein KIAA0774.

[Source:Uniprot/SWISSPROT;Acc:Q5JR59]

TAAAATAAAAAGTAAAAGCTCCTAAATCCTACTGATTAGAAGTAACCATTTATTTAAAAGTTTGGTACCTTATCTTTCAGAT  
ATTTTTACTTATTTCTAAGC

In100 candidate846 (in intron):

LOCUS ENSG00000132938

DESCRIPTION Uncharacterized protein KIAA0774.

[Source:Uniprot/SWISSPROT;AccQ5JR59]

AATATACGAAATACATTTACAATAACTGTTTAACTGTCCCTGTCTAGTAATTCTGTTATCTGTGTCATTTTTTGTTCAGTT  
TCAATTGATTGCATCTTCTC

In100 candidate847 (in intron):

LOCUS ENSG00000164258

DESCRIPTION NADH dehydrogenase [ubiquinone] iron-sulfur protein 4,  
mitochondrial precursor (EC 1.6.5.3) (EC 1.6.99.3) (NADH-ubiquinone  
oxidoreductase 1 kDa subunit) (Complex I-18 kDa) (CI-18 kDa) (Complex I-AQDQ)  
(CI- AQDQ). [Source:Uniprot/SWISSPROT;Acc:043181]

AAAAAGATAACCTTAAGTTAAAGGCTTACTTTTGCTTTGACTGTTTACTTTTTTTTTTCCCCCTCTAAGGGGTCAGTTTTC  
TTTTGGTGAGATTACTTTCT

In100 candidate848 (in intron):

LOCUS ENSG00000164258

DESCRIPTION NADH dehydrogenase [ubiquinone] iron-sulfur protein 4,  
mitochondrial precursor (EC 1.6.5.3) (EC 1.6.99.3) (NADH-ubiquinone  
oxidoreductase 1 kDa subunit) (Complex I-18 kDa) (CI-18 kDa) (Complex I-AQDQ)  
(CI- AQDQ). [Source:Uniprot/SWISSPROT;Acc:043181]

TTGCACCTCCCATCTACTACTGGATGAACTCCTCTTTCTTCCTTTTAACTTTCACAATAATTTGTTCCCTTTCTTGCAGCT  
CTTATAGTATGGTTTTCTCT

In100 candidate849 (in intron):

LOCUS ENSG00000139514

DESCRIPTION High-affinity cationic amino acid transporter 1 (CAT-1) (CAT1)  
System Y+ basic amino acid transporter) (Ecotropic retroviral leukemia recetor  
homolog) (ERR) (Ecotropic retrovirus receptor homolog).

[Source:UniprotSWISSPROT;Acc:P30825]

CTGTTAAGTTCCTTTCTTTACTTATCTCTTTAACCATAACCCCCATTTCTTTTGTGTTTGTGTTTGTACTGCATGCAGGC  
ATCTTTATTTGTTCTGTCT

In100 candidate850 (in intron):

LOCUS ENSG00000185305

DESCRIPTION ADP-ribosylation factor-like 15 (ARL15), mRNA

[Source:RefSeq\_dn;Acc:NM\_019087]

AGTTTGTTAGCCAAGGACCTTTATTTATTTATTGCTAACCATAAATATGATTGCTCCATTTTTTGTGTCATGTTCCAGAT  
GAGTAGTTTTTTTTTATTCTT

In100 candidate851 (in intron):

LOCUS ENSG00000185305

DESCRIPTION ADP-ribosylation factor-like 15 (ARL15), mRNA

[Source:RefSeq\_dn;Acc:NM\_019087]

AGTAACTACCAACAAGAATCTTAACCTTTTTGCTATTTGTTTTCTGTATGTCTTACACATTTTTGTCATTCCCTCCAGTA  
CTGCCTTCTTTTGTGTTTAG

In100 candidate852 (in intron):



LOCUS ENSG00000168522

DESCRIPTION Protein farnesyltransferase/geranylgeranyltransferase type I alpha subunit (EC 2.5.1.58) (EC 2.5.1.59) (CAAX farnesyltransferase alpha subunit) (Ras proteins prenyltransferase alpha) (FTase-alpha) (Type I protein geranylgeranyltransferase

alpha subunit) [Source:Uniprot/SWISSPROT;Acc:P49354

AGCGTCATTCATTCAAATAACTCTCCTTTTCTTGTTTGTGTTTCAGGGTTTATTTTCTCTTGATCTTCTACTGCTTTT  
GTTCTTCCTTCACAAAATCA

In100 candidate853 (in intron):

LOCUS ENSG00000013583

DESCRIPTION Heme-binding protein 1 (p22HBP).

[Source:Uniprot/SWISSPROT;Acc:9NRV9]

CTGTATTTTTTTCTGAATCTCCTGTTTAACTTTATCTTCCAACCTGTTTACTGAATTTTTCTTCTCTGTTATCAGATTTT  
TAATTTCTGAGAGCTCTTTT

In100 candidate854 (in intron):

LOCUS ENSG00000166847

DESCRIPTION Dynactin subunit 5 (Dynactin subunit p25).

[Source:Uniprot/SWISPROT;Acc:Q9BTE1]

TCCATGGACTAGGTAAGGTCTCCTTGTTATATATGCTCATAACTTGATATTGTGTTTCTGTAGCCCTTATCACAGTTGTC  
ACTACTTACTATTTAATCTC

In100 candidate855 (in intron):

LOCUS ENSG00000150471

DESCRIPTION Latrophilin-3 precursor (Calcium-independent alpha-latrotoxin

rceptor 3) (Lectomedin-3). [Source:Uniprot/SWISSPROT;Acc:Q9HAR2]

AATTAAAAAGCAATCTTAAAAAGTTGGTTCTTTTGTTCTTTAACAAAATGAAATGTTTCCCTTTAGCTTTATTCACAGCC  
ATGTGTTTGACTCTTTTACT

In100 candidate856 (in intron):

LOCUS ENSG00000150471

DESCRIPTION Latrophilin-3 precursor (Calcium-independent alpha-latrotoxin  
rceptor 3) (Lectomedin-3). [Source:Uniprot/SWISSPROT;Acc:Q9HAR2]

ATTTTGATAGCATCCTGTCCCTTGTGTCCACATCCTGATAGTTAACAAAATTCATAGTAATTCCTCAAATCTTTCAGGG  
TATTACTCTCTTTCTATTTT

In100 candidate857 (in intron):

LOCUS ENSG00000150471

DESCRIPTION Latrophilin-3 precursor (Calcium-independent alpha-latrotoxin  
rceptor 3) (Lectomedin-3). [Source:Uniprot/SWISSPROT;Acc:Q9HAR2]

TGTAACCTTTCACCTTTTCTTCTTTCCTTATTCCTTCTTTCCTTTCTTTTTCTTCCTTCTCTTTTCCTTCCAGTATCCA  
TCCATCACTCATTTTTTAATT

In100 candidate858 (in intron):

LOCUS ENSG00000150471

DESCRIPTION Latrophilin-3 precursor (Calcium-independent alpha-latrotoxin  
rceptor 3) (Lectomedin-3). [Source:Uniprot/SWISSPROT;Acc:Q9HAR2]

GTAAGTCAAGTCTTCTTGTCTTGTTTCAGGAGCTCTTCTCCACAGATTATCTGAATAAACCCATAGAATTTTCTTAGT  
CTCTCTCTTTCTCCTTCTTT

In100 candidate859 (in intron):

LOCUS ENSG00000150471

DESCRIPTION Latrophilin-3 precursor (Calcium-independent alpha-latrotoxin  
receptor 3) (Lectomedin-3). [Source:Uniprot/SWISSPROT;Acc:Q9HAR2]

ACTTTTATACTTCACTGTTTTTATAGCAAAGTTAACTCCGTTTAACTTTTAACTTTTCCTTGGTCACTACAGATTATCAT  
TATGTTGGGGTTTCTTTTTT

In100 candidate860 (in intron):

LOCUS ENSG00000150471

DESCRIPTION Latrophilin-3 precursor (Calcium-independent alpha-latrotoxin  
receptor 3) (Lectomedin-3). [Source:Uniprot/SWISSPROT;Acc:Q9HAR2]

TTCATTTACACTGTACATTTTACCTTCTAACACTATATGGTTTATTATTTGCTTCCCTTGCCAGAATGTTTCAGTTCTAA  
GATCATTTTTTCTCTGCTTT

In100 candidate861 (in intron):

LOCUS ENSG00000166233

DESCRIPTION Protein ariadne-1 homolog (ARI-1) (Ubiquitin-conjugating  
enzymeE2- binding protein 1) (UbcH7-binding protein) (UbcM4-interacting protein)  
HHARI) (H7-AP2) (Monocyte protein 6) (MOP-6).

[Source:Uniprot/SWISSPROT;AccQ9Y4X5]

TTTGGGCAAAGGTCGGAGCTGGTGGAGAAAGGACACCTTTAACTTTATGGTCTTTTCTTTTATCCATTATAGCAGTTTTC  
CAGACCACTGTCATTTTCTT

In100 candidate862 (in intron):

LOCUS ENSG00000122042

DESCRIPTION Ubiquitin-like protein 3 precursor (Membrane-anchored ubiquitin fold protein) (MUB) (HsMUB) (Protein HCG-1).

[Source:Uniprot/SWISSPROT;Acc:95164]

TAGCTAGTAGTCTAATTTAATCTTCAAATAACCAACTCCTGGATTTGTTGATCTTTTGTATGGTTTTTCACATCTCAGTT  
TCCTTCATTTTCAGCTCTAAT

In100 candidate863 (in intron):

LOCUS ENSG00000134531

DESCRIPTION Epithelial membrane protein 1 (EMP-1) (Tumor-associated membrane protein) (CL-20) (B4B protein). [Source:Uniprot/SWISSPROT;Acc:P54849]

TTAGATGAAAGTGGCTTATTAACCACTAGATTCATTGTTATTTTCCCAGTAGGTCTTATGTTTCTTAATTGTTTCCAGTT  
GGACATTTCACTTTTTTTCCT

In100 candidate864 (in intron):

LOCUS ENSG00000150086

DESCRIPTION Glutamate [NMDA] receptor subunit epsilon 2 precursor (N-methyl-D-aspartate

receptor subtype 2B) (NR2B) (NMDAR2B) (N-methyl-D-aspartate receptor subunit 3) (NR3) (hNR3). [Source:Uniprot/SWISSPROT;Acc:Q13224]

GTGTTATCTTCTGTAAATTATAGAAAGAATGATAACATAACCTTTTATATTTAGTCATTTATTTTCCATTTTCAGTACAT  
CTTATTTCTTCTTGTAGATC

In100 candidate865 (in intron):

LOCUS ENSG00000150086

DESCRIPTION Glutamate [NMDA] receptor subunit epsilon 2 precursor (N-methylDaspartate

receptor subtype 2B) (NR2B) (NMDAR2B) (N-methyl-D-aspartate reeptor subunit 3) (NR3) (hNR3). [Source:Uniprot/SWISSPROT;Acc:Q13224]

CCCTGAAACCTAATGGCGGTTTAGTGTAGGTCATGTTCAATACGTAACCTTCAATAGGAGTATTAATTCCTTTCAGCGTT  
GTTACCCATCATTTTCCTTT

In100 candidate866 (in intron):

LOCUS ENSG00000145242

DESCRIPTION Ephrin type-A receptor 5 precursor (EC 2.7.10.1) (Tyrosine-protein kinase receptor EHK-1) (EPH homology kinase 1) (Receptor protein- tyrosie kinase HEK7). [Source:Uniprot/SWISSPROT;Acc:P54756]

CTCTTTAGTTTTTGTCTTTCTTTCAAGCCCTAATAACCTCTTATGTCTTCTCATAATGATTCTTCTCCAGCTTATGGCCTC  
TTGCTAGATTGCCTTTATTC

In100 candidate867 (in intron):

LOCUS ENSG00000171681

DESCRIPTION activating transcription factor 7 interacting protein  
[Source:RfSeq\_peptide;Acc:NP\_060649]

TTGGGTAAACAATAGTTGGAGGTCTTTGAGCTTCTTGAATTTGCATCTCCATTTTCTTCTTCCAGTTTCAGACATTTTCA  
GCAATTATTTATCTTTCTCT

In100 candidate868 (in intron):

LOCUS ENSG00000121031

DESCRIPTION DNA-dependent protein kinase catalytic subunit (EC 2.7.11.1) (DAPK catalytic subunit) (DNA-PKcs) (DNPK1) (p460).

[Source:Uniprot/SWISSPRO;Acc:P78527]

TGTATAACATTAAGGAGCCTTCCTTGATTTATCTCTTCTGTGGCCTTGCAGGGTGTAGCCACCTTTCTCCTTTGGTATCT  
TTATCCTCCAGTGGCTATTT

In100 candidate869 (in intron):

LOCUS ENSG00000121031

DESCRIPTION DNA-dependent protein kinase catalytic subunit (EC 2.7.11.1) (DAPK catalytic subunit) (DNA-PKcs) (DNPK1) (p460).

[Source:Uniprot/SWISSPRO;Acc:P78527]

TTTTTTTCTAACTGTATTAAGTACATTCTCATACTTTTGTGATATTTTGCATTCCTTGCAGAGCATTGTGAACATAGTT  
TAGCTTTTTTTTTTTTTTTTTT

In100 candidate870 (in intron):

LOCUS ENSG00000121031

DESCRIPTION DNA-dependent protein kinase catalytic subunit (EC 2.7.11.1) (DAPK catalytic subunit) (DNA-PKcs) (DNPK1) (p460).

[Source:Uniprot/SWISSPRO;Acc:P78527]

AGATTCAC TGATTTTTTAAATAACATTTTAAACATTTTCCATGTTAGTATTTGTATTTTTTCTTTTCTACCAGACCCT  
ACATATTATTTATTTTCTGA

In100 candidate871 (in intron):

LOCUS ENSG00000121031

DESCRIPTION DNA-dependent protein kinase catalytic subunit (EC 2.7.11.1) (DAPK catalytic subunit) (DNA-PKcs) (DNPK1) (p460).

[Source:Uniprot/SWISSPRO;Acc:P78527]

CCCATCCATGAACATGAAGTAACTTTGCATTTCTTTGAGTCCTCTTCAATTTCTTTCATCCATGTTTTACAGTTTTTCATT  
GTAGAGATCTTTCATTTCTT

In100 candidate872 (in intron):

LOCUS ENSG00000067141

DESCRIPTION Neogenin precursor. [Source:Uniprot/SWISSPROT;Acc:Q92859]

AGTGGCTTAGTTACTATAGCTTTATACATACTTGTAACATAACAAGTGGAGTCCCTTTACTTTGTTTTGCAGAATTACTTT  
GGCTCTTACTGGCTTTTTTTT

In100 candidate873 (in intron):

LOCUS ENSG00000102781

DESCRIPTION Katanin p60 ATPase-containing subunit A-like 1 (EC 3.6.4.3)  
(Kaanin p60 subunit A-like 1) (p60 katanin-like 1).

[Source:Uniprot/SWISSPROT;cc:Q9BW62]

ATACAAACGTTAATGAAATGTAGCTCCTGGCCTGAATAAATTAACTTTTAAGCTATATTTTTCTGTTTTATTTTCAGTGT  
GTCTGGTCTCTTCCTACTAT

In100 candidate874 (in intron):

LOCUS ENSG00000006116

DESCRIPTION Voltage-dependent calcium channel gamma-3 subunit (Neuronal  
volage- gated calcium channel gamma-3 subunit).

[Source:Uniprot/SWISSPROT;Acc:60359]

GATTTTCATTCATTAGAGGAGATAACCCCAAATGTTGTGGATTTATTCTCTCCTCTCCTGAATATTATTCAGTTTTATAT  
TACTTTAGTAATCTTATTTTC

In100 candidate875 (in intron):

LOCUS ENSG00000140153

DESCRIPTION WD repeat protein 20 (DMR protein).

[Source:Uniprot/SWISSPROT;Ac:Q8TBZ3]

TTAACCTCAACTTTTTTTTATACATTTTTTGACCCACTCAGTACTTCACCTCCTTTGCTAGTTCTTTCTACTCTACCTAGA  
ATTTAACTATCGGATTTCTT

In100 candidate876 (in intron):

LOCUS ENSG00000140153

DESCRIPTION WD repeat protein 20 (DMR protein).

[Source:Uniprot/SWISSPROT;Ac:Q8TBZ3]

CCTTTTAATTCTCTCACAAACCTTAACCTTTTTTGACATAGATTCTTCTTCTTATTTATTTATTTATTTGACACAGGGT  
CTTGCTTTGTCTTCCAGGCT

In100 candidate877 (in intron):

LOCUS ENSG00000131373

DESCRIPTION 2-hydroxyacyl-CoA lyase 1 (EC 4.1.-.-) (2-hydroxyphytanoyl-CoA  
yase) (2-HPCL). [Source:Uniprot/SWISSPROT;Acc:Q9UJ83]



AGGGTATGGGTGTGTCTATTTATGCCTCACTAACTTTATTTGTTGTTTTCTTATTATTTGTTGTTTTGCAGTAATCTTTT  
TTTTTCATGTTTTTCTTCTG

In100 candidate878 (in intron):

LOCUS ENSG00000033178

DESCRIPTION Ubiquitin-activating enzyme E1-like protein 2 (Monocyte protein4)  
(MOP-4). [Source:Uniprot/SWISSPROT;Acc:A0AVT1]

AGTTTTTTTTTAACCATATATATGTAGGTCTATTTCTGTACTCTATTGTCTTCATGTTGTTTCTGTCCTTTTGCCAGCTCC  
ATCCTGTCTTGCTTATTGTG

In100 candidate879 (in intron):

LOCUS ENSG00000033178

DESCRIPTION Ubiquitin-activating enzyme E1-like protein 2 (Monocyte protein4)  
(MOP-4). [Source:Uniprot/SWISSPROT;Acc:A0AVT1]

TCTTGCTTTAACATTCCCTGATCTCTAATCTACCTATCTACTCTTCATCTAGTTTAGCTTTTTTTCTTCATCCTTTCAGTT  
TCAGCCTAAATTTCTTTTTA

In100 candidate880 (in intron):

LOCUS ENSG00000169814

DESCRIPTION Biotinidase precursor (EC 3.5.1.12).  
[Source:Uniprot/SWISSPROT;cc:P43251]

TTCTCCTTCTGGTATTCCCATTTGTACATATTTATAACTTTTGTAGTCCACTGTTTGTTGATTTTTTTCTTTTTTTCAGTC  
TTTTTTCTCTTTGCTTTTCA

In100 candidate881 (in intron):

LOCUS ENSG00000039123

DESCRIPTION Superkiller viralicidic activity 2-like 2 (EC 3.6.1.-) (ATPdependent

helicase SKIV2L2). [Source:Uniprot/SWISSPROT;Acc:P42285]

TCTATTATTGAAAGTGGAGTATTGAAGTCTCGTAACTATTGTTGTTGTATTATCTATTTTTCCCTTCATTTCTATCAGTT  
TTTGCTTCATGTGTTTTCAA

In100 candidate882 (in intron):

LOCUS ENSG00000039123

DESCRIPTION Superkiller viralicidic activity 2-like 2 (EC 3.6.1.-) (ATPdepdent  
helicase SKIV2L2). [Source:Uniprot/SWISSPROT;Acc:P42285]

ACTATTAATTATCGTGTGTTCTCCTGCCTTGCCTCTTAACAAAAATTCTGCTGTTCTGATTATTTCCATTTTACCAGTG  
TTTTGTTTCCTTTTCTATCCA

In100 candidate883 (in intron):

LOCUS ENSG00000189403

DESCRIPTION High mobility group protein B1 (High mobility group protein 1)  
HMG- 1). [Source:Uniprot/SWISSPROT;Acc:P09429]

TGTTTCTGAATGCTTGCTGTGCTGAATATTGGCACTGAATGTTTCATGTTTAACCTTTTGTCTAATTATTTTCATTTTCAGGT  
CCTCCTTTTAGGTCATTATT

In100 candidate884 (in intron):

LOCUS ENSG00000156642



TTTTTTTTTTTTTTTTTTTT

In100 candidate888 (in intron):

LOCUS ENSG00000067113

DESCRIPTION Lipid phosphate phosphohydrolase 1 (EC 3.1.3.4) (Phosphatidic acid phosphatase 2a) (Phosphatidate phosphohydrolase type 2a) (PAP2a) (PAP- 2) (PAP2-alpha). [Source:Uniprot/SWISSPROT;Acc:O14494]

CAAAAAGCCACTTGTTTTGCCTCCTTTATGCTTTAACCATTGCTCAATCTTCAAAGTTTATTCTTCCTCAGCACCCCTTTCTATTGACTCAAATTGTTT

In100 candidate889 (in intron):

LOCUS ENSG00000067113

DESCRIPTION Lipid phosphate phosphohydrolase 1 (EC 3.1.3.4) (Phosphatidic acid phosphatase 2a) (Phosphatidate phosphohydrolase type 2a) (PAP2a) (PAP- 2) (PAP2-alpha). [Source:Uniprot/SWISSPROT;Acc:O14494]

ATCAATTTTATTAACCTTTTGGTTAGTTTCAAGGGTTTCTTTTGATTTTCATTGATTTTTATCTATTTTTTGTGTTTCAGTTTCATTTATTTTTGCTTTTAT

In100 candidate890 (in intron):

LOCUS ENSG00000034239

DESCRIPTION EF-hand calcium-binding domain-containing protein 1.

[Source:Uniprot/SWISSPROT;Acc:Q9HAE3]

AGCTGTTTTTGAAATCATAACCATTATATTGTTTCCTACTATTTATTTGCTGAATCTTTTTTCCCAGACTTTTGTAGTGT  
TCTCTTTAAATGTGGTTTTTC

In100 candidate891 (in intron):

LOCUS ENSG00000131386

DESCRIPTION Polypeptide N-acetylgalactosaminyltransferase-like protein 2 (E  
2.4.1.41) (Protein-UDP acetylgalactosaminyltransferase-like protein 2)

(UDGalNAc:

polypeptide N-acetylgalactosaminyltransferase- like protein 2)

(Polpeptide GalNAc transferase-like protein [Source:Uniprot/SWISSPROT;Acc:Q8N3T]

ATACCTAGGCCCTTATAACCTATATATTTATGTTCTTTCTCCAAATGCTGACTTTCTAAATTTACTTATATTCCTCAGCT  
CCTGACTTTTCTTCCTTATT

In100 candidate892 (in intron):

LOCUS ENSG00000089902

DESCRIPTION REST corepressor 1 (Protein CoREST).

[Source:Uniprot/SWISSPROT;cc:Q9UKL0]

GCTCATTGACATTCCTTCCTCTCAATACCTTAACTATGGCATGTTTTATAATTGCTTTTGTTTTGCTTTATCACAGTA  
TTTTCCTATGTTTTTTATAG

In100 candidate893 (in intron):

LOCUS ENSG00000198092

DESCRIPTION transmembrane protease, serine 11F

[Source:RefSeq\_peptide;Acc:N\_997290]

GTGGGCAAGACGTAGGGGACAAAACAACTTATTACCTTTAACCATGAGACTTTTGTTTGTTTTACCTTTCAGATGATAAG  
TCTTTCTATTACCTTGCCTC

In100 candidate894 (in intron):

LOCUS ENSG00000147481

DESCRIPTION Gamma-1-syntrophin (G1SYN) (Syntrophin 4) (SYN4).

[Source:Uniprt/SWISSPROT;Acc:Q9NSN8]

GAAATCCTTTTAACTCTGGGGAGAATGTCCCTTCCTGGTTGTGCTACTTTCTCTGCTTTCTTGTCTCATTCTACAGTT  
ATTCTTTCATTGCTGTTTAG

In100 candidate895 (in intron):

LOCUS ENSG00000147481

DESCRIPTION Gamma-1-syntrophin (G1SYN) (Syntrophin 4) (SYN4).

[Source:Uniprt/SWISSPROT;Acc:Q9NSN8]

AATCTCTTAACCTTGATGTATACTTTATGAGTCTCTGCTTTTCCCTGATTGTTCCATTTCTTAAGTTTTTCAGCTTGA  
ATTTTTGTTCTTATAGCTTT

In100 candidate896 (in intron):

LOCUS ENSG00000147481

DESCRIPTION Gamma-1-syntrophin (G1SYN) (Syntrophin 4) (SYN4).

[Source:Uniprt/SWISSPROT;Acc:Q9NSN8]

AGTAGTGATATCCCCTTTAACTTTTTTTGTTGTGTTTATTTGATTCTACTCTCTTTTCTTCTTAGTTTAGCTAGCAGTC  
TATCTATTTTGTTTTTTCAA

In100 candidate897 (in intron):

LOCUS ENSG00000147481

DESCRIPTION Gamma-1-syntrophin (G1SYN) (Syntrophin 4) (SYN4).

[Source:Uniprt/SWISSPROT;Acc:Q9NSN8]

TGAATAGTCTTTCCTTTTTTCAATCTTCTTACAACCTTTATTCTAACTGGTTAATTCTCACAATTCTTTTATCCAGTTC  
ACTGACTCTTCTGTTCTCTT

In100 candidate898 (in intron):

LOCUS ENSG00000152670

DESCRIPTION Probable ATP-dependent RNA helicase DDX4 (EC 3.6.1.-) (DEAD  
boxprotein 4) (VASA homolog). [Source:Uniprot/SWISSPROT;Acc:Q9NQI0]

GTATAACTTATTTTCCATATGATTCTTCTAACATTTTATATAGTTTCCTTTTTTTTTTCTTTTCTTTTTTGAGACAGTT  
TTGCTCTTGTTGCCTAGGCT

In100 candidate899 (in intron):

LOCUS ENSG00000147485

DESCRIPTION peroxidasin homolog (Drosophila)-like (PXDNL), mRNA

[Source:Refseq\_dna;Acc:NM\_144651]

GAGCTTCGCCTTCTCTGGTCCCTCTCTGATTAGCTTAATAAATAACCTCCTGAATTCTTTTTCTCGTAAGTCAGGGATT  
TCTTCTTGTTTGGATCCTT

In100 candidate900 (in intron):

LOCUS ENSG00000154814

DESCRIPTION oxidoreductase NAD-binding domain containing 1

[Source:RefSeq\_ptide;Acc:NP\_612390]

CACTGGCCTTGGTTCCTTTAACATGCCGGGCTTATTTCTGTGTTGGACCTTGCTCTTGCTAGTCCTTCTGCCAGAGTTG  
TCTGCCTTTAACATTTGCTT

In100 candidate901 (in intron):

LOCUS ENSG00000168300

DESCRIPTION Protein-L-isoaspartate O-methyltransferase domain-containing  
prtein 1. [Source:Uniprot/SWISSPROT;Acc:Q96MG8]

TTGCTAACTAAGATGCTGCTTTTCCTTTTTATTCATTACTTTTGGACAGATTTACTTTCTGTCATCATAGATAAGGTTTT  
AGCTCCCATGCCCCTCTTTT

In100 candidate902 (in intron):

LOCUS ENSG00000147488

DESCRIPTION Suppression of tumorigenicity protein 18 (Zinc finger protein  
37). [Source:Uniprot/SWISSPROT;Acc:O60284]

TGTGCTGTGAGGCACATGCCAAAACAAATCATATTATCATTTTAACTAAAATCCTCCTGTGTTTCTTTTTTTAAACAGTC  
TTTCTGGTTGTCCAATTGCT

In100 candidate903 (in intron):

LOCUS ENSG00000147488

DESCRIPTION Suppression of tumorigenicity protein 18 (Zinc finger protein  
37). [Source:Uniprot/SWISSPROT;Acc:O60284]

ATGGGTTTCTAATATTTATTTTTTATAACATATGTATTTTCTTTTTCTTTTCTTTTTTTTTTTTTTTTTTTGAGACAGAG  
TTTTACTCTTGTTGCCAGT



In100 candidate904 (in intron):

LOCUS ENSG00000087128

DESCRIPTION Transmembrane protease, serine 11E precursor (EC 3.4.21.-) (Serine protease DESC1) [Contains: Transmembrane protease, serine 11E non- catalytic chain; Transmembrane protease, serine 11E catalytic chain].

[Source:Unirot/SWISSPROT;Acc:Q9UL52]

TTTATGAATAACTAAGTTCCACTAATTCTATTTTCCCAATAACTTTCCAATTTGCTCACCTCTTTATTCCAGTAATCTTG  
CTACTGCTACTCATTATTCT

In100 candidate905 (in intron):

LOCUS ENSG00000131374

DESCRIPTION TBC1 domain family member 5. [Source:Uniprot/SWISSPROT;Acc:Q9269]

GGACCTAAAAAAAAAAAAAAAAATACTTCTTCGCTCCTAAGTAGTTATAACAACCTGGCCTTCTCTCTCTTGGATTGTCAGTT  
CATATTTTACTTTGCCTGGT

In100 candidate906 (in intron):

LOCUS ENSG00000131374

DESCRIPTION TBC1 domain family member 5. [Source:Uniprot/SWISSPROT;Acc:Q9269]

AGCATTTTATAGGCATTATAACATAGAATCCTCCATATCATTTCACTTTCTTTTACAGGCAACTTTTTTGAAGGACTTA  
TCTCTACTTTGCTACCTTTT

In100 candidate907 (in intron):

LOCUS ENSG00000131374

DESCRIPTION TBC1 domain family member 5. [Source:Uniprot/SWISSPROT;Acc:Q9269]

CTTTTAATACATCTTCTTTGCTGTAAACATTCTAGTTTTTCATTATGTGGTCTGCATTTTCTTTGTGTTCTACCTCCCAGGA  
GATGTTTCTTCTCTTCTCAT

In100 candidate908 (in intron):

LOCUS ENSG00000131374

DESCRIPTION TBC1 domain family member 5. [Source:Uniprot/SWISSPROT;Acc:Q9269]

TTTATTTGCTGATTTCTTACTATTGATTTGATAGTCTATAATTAACATGTATCTTTTAAATAATTTTTTTTCAGTTCTT  
GGTACTTAATTCTAGTCCTT

In100 candidate909 (in intron):

LOCUS ENSG00000023287

DESCRIPTION RB1-inducible coiled-coil protein 1.

[Source:Uniprot/SWISSPROT;cc:Q8TDY2]

ACTTTTTCTCTTTTTTTAGTGGCTAACTGTAGCTAACCACTTGCTCATTTCTTAATTTTGTTTCATTTTTCAGCTCTACAG  
TTTCAGTTTGGTTCTTTTGT

In100 candidate910 (in intron):

LOCUS ENSG00000134352

DESCRIPTION Interleukin-6 receptor subunit beta precursor (IL-6R-beta)

(Interleukin-6 signal transducer) (Membrane glycoprotein 130) (gp130) (Oncostatin  
M receptor alpha subunit) (CD130 antigen) (CDw130).

[Source:Uniprot/SWISSPOT;Acc:P40189]

TATATTTAAACATATTTGATATGTTTTAACTCATTATGGATTGTCCCATCTTTGATCAGTGGCAGTTTACTCAAATTGGC  
TCATTCATCCTTTTTTTTTTT

In100 candidate911 (in intron):

LOCUS ENSG00000075413

DESCRIPTION MAP/microtubule affinity-regulating kinase 3 (EC 2.7.11.1)  
(Cdc5C- associated protein kinase 1) (cTAK1) (C-TAK1) (Serine/threonine  
proteinkinase p78) (Ser/Thr protein kinase PAR-1) (Protein kinase STK10).

[Source:niprot/SWISSPROT;Acc:P27448]

AGTTCTCTCCCAACAATTGAAGATACCTGCGTTAACACATAATAAATTCTCATATGTGTCCTGTTATTTCTCCAGTCTGT  
TTATTTAGTCCTATACCCAT

In100 candidate912 (in intron):

LOCUS ENSG00000173487

DESCRIPTION

TTTATGAATAACTAAGTTCCACTAATTCTATTTTCCCAATAACTTTCCAATTTGCTCACCTCTTTATTCCAGTAATCTTG  
CTACTGCTACTCATTATTCT

In100 candidate913 (in intron):

LOCUS ENSG00000182568

DESCRIPTION DNA-binding protein SATB1 (Special AT-rich sequence-binding  
proein 1). [Source:Uniprot/SWISSPROT;Acc:Q01826]

AGTATCCATATTGGAAATTTCAAATTTAACCTACCATATTTCTATTTCTTATACTTTAGCTAACATATCTTCCTTCAGAT  
TTCCCCACATTTTAACTTTT

In100 candidate914 (in intron):

LOCUS ENSG00000151491

DESCRIPTION Epidermal growth factor receptor kinase substrate 8.

[Source:Unprot/SWISSPROT;Acc:Q12929]

CTTGAGAGGGAACCATGGCTCTTAACCTTTCATTTATACTTTCTTTCATTTTATTTCTCTTCCTTCTGTTAAATCAGGT  
ATTTTTATATTCCTCTACTC

In100 candidate915 (in intron):

LOCUS ENSG00000183960

DESCRIPTION Potassium voltage-gated channel subfamily H member 8 (Voltagegated  
potassium channel subunit Kv12.1) (Ether-a-go-go-like potassium channel3)  
(ELK channel 3) (ELK3) (ELK1) (hElk1). [Source:Uniprot/SWISSPROT;Acc:Q9642]

AGATTTTCTCCCACTGTGTGGGTGTCTGTTAACCTCTGCTGTTTATTTCTTTTGCTCTGCAGAAGCTTTTATGTTTCATT  
AAGTCCCATCTATTTATCTT

In100 candidate916 (in intron):

LOCUS ENSG00000182601

DESCRIPTION Heparan sulfate glucosamine 3-O-sulfotransferase 4 (EC 2.8.2.23  
(Heparan sulfate D-glucosaminyl 3-O-sulfotransferase 4) (Heparan sulfate  
3O-sulfotransferase

4) (h3-OST-4). [Source:Uniprot/SWISSPROT;Acc:Q9Y661]

GCTCTCTTCACCTTTGTCCAACCCACTGCTTAACTTACATACTGAATTCTTAATTTTCAGTTATTGTAGTTTTTCAGTTCTA  
GGATTTCTATTTTATTCCTT

In100 candidate917 (in intron):

LOCUS ENSG00000182601

DESCRIPTION Heparan sulfate glucosamine 3-O-sulfotransferase 4 (EC 2.8.2.23  
(Heparan sulfate D-glucosaminyl 3-O-sulfotransferase 4) (Heparan sulfate  
3O-sulfotransferase

4) (h3-OST-4). [Source:Uniprot/SWISSPROT;Acc:Q9Y661]

AGTCCATAACATCCCCATTGCTCTTAGTACCTTATTTTATTTAACTCTCTCAGCTTTATAATACGTTTTTCTTTTCCTTA  
CTATTTGCTTCTCACACTTT

In100 candidate918 (in intron):

LOCUS ENSG00000198277

DESCRIPTION UDP-glucuronosyltransferase 2B11 precursor (EC 2.4.1.17) (UDPGT.  
[Source:Uniprot/SWISSPROT;Acc:O75310]

TGTTTAGTCTAAATTAACCTTAGAATTGGTATAGATGGCCTTTTTTTTTCTCTCTGCTGGTCTTTCCTTGCCTCTGCCAGCT  
GCTTATGCTGCTGTTCTCTT

In100 candidate919 (in intron):

LOCUS ENSG00000171234

DESCRIPTION UDP-glucuronosyltransferase 2B7 precursor (EC 2.4.1.17)  
(UDPGT)(3,4- catechol estrogen specific) (UDPGTh-2).

[Source:Uniprot/SWISSPROT;AccP16662]

GAGTATTCTATTTACATTAGTCTTTGAGTAGTTCTTATTTACTAACATCCCTTGATCTCATTCCTACTCTTTATACAGTT  
CTCACATTCTATAACTTTTG

In100 candidate920 (in intron):

LOCUS ENSG00000135226

DESCRIPTION UDP-glucuronosyltransferase 2B28 precursor (EC 2.4.1.17) (UDPGT.  
[Source:Uniprot/SWISSPROT;Acc:Q9BY64]

TACAATTTTCTTAGGTTCTGTTTATTTGTTTTTCCTTTTTTTTTTAACTGACTGAATAATTTCAATGACTCTTTCTTCAGGT  
TTGCCAATTCTTTCTTCTAT

In100 candidate921 (in intron):

LOCUS ENSG00000048540

DESCRIPTION LIM domain only protein 3 (Neuronal-specific transcription factor  
DAT1) (Rhombotin-3). [Source:Uniprot/SWISSPROT;Acc:Q8TAP4]

AACACTCCTAGAATAAGGAAATATTAAATATTTAACTTGTTTGAGGTCTTTTTATTCTGTCTGGTAGTCTCAGCTCTCTT  
TTTTGCTTTTGTCTTCCTTT

In100 candidate922 (in intron):

LOCUS ENSG00000129810

DESCRIPTION Shugoshin-like 1 (hSgo1) (Serologically defined breast cancer  
antigen NY-BR-85). [Source:Uniprot/SWISSPROT;Acc:Q5FBB7]

TCTCTTAACTCCTTTTTTCATATTTTCCATCTTTTTAGCTACATTCTTCCATATCATTTTCGTCAGTTCTATCTTCCAGTT  
CACTCATTTCTATCCTTGTT

In100 candidate923 (in intron):

LOCUS ENSG00000164512

DESCRIPTION Ankyrin repeat domain-containing protein 55.  
[Source:Uniprot/SWISSPROT;Acc:Q3KP44]

AACAACTATTATCTCCTAGGTTAATTAACAATAAAAAATAAAAGTTTTTATTTTACCTTCACTTATTCCTTCTTCAGCG  
TTCTTCTTTTCTTTACGTAA

In100 candidate924 (in intron):

LOCUS ENSG00000182247

DESCRIPTION Ubiquitin-conjugating enzyme E2 E2 (EC 6.3.2.19) (Ubiquitinproein ligase E2) (Ubiquitin carrier protein E2) (UbcH8).

[Source:Uniprot/SWISPROT;Acc:Q96LR5]

AATTATTTTACTCCGCTTTTCTTTCCGTAGGAGTTAACACCTCCTAACATTTACTTCTATCAGTTTCTTATGATTAAC  
TGTGTTGTGTATTCCCTCCC

In100 candidate925 (in intron):

LOCUS ENSG00000182247

DESCRIPTION Ubiquitin-conjugating enzyme E2 E2 (EC 6.3.2.19) (Ubiquitinproein ligase E2) (Ubiquitin carrier protein E2) (UbcH8).

[Source:Uniprot/SWISPROT;Acc:Q96LR5]

AGTAGTTTGTTCACAAGGAAATAACATATAAAGCAATATGTTTATTTTCAGGTTATTTCCAGTTTATTTTCTTCATTTCT  
TTTTTCTTTTCTCTCTTCCA

In100 candidate926 (in intron):

LOCUS ENSG00000133105

DESCRIPTION Relaxin receptor 2 (Relaxin family peptide receptor 2)  
(Leucinerich repeat-containing G-protein coupled receptor 8) (G-protein coupled  
recptor affecting testicular descent) (G-protein coupled receptor 106).

[Source:Uniprot/SWISSPROT;Acc:Q8WXD0]

AGTGTTAATAGAATGTGTCTGATGAAGGAAAGATAATTTAACTAATTCTCCTTTTCTCTGATTCCAGTTTATTTTCTAT  
TCAATTGCTAGGTTTGTTTT

In100 candidate927 (in intron):

LOCUS ENSG00000170142

DESCRIPTION Ubiquitin-conjugating enzyme E2 E1 (EC 6.3.2.19) (Ubiquitinproein  
ligase E1) (Ubiquitin carrier protein E1) (UbcH6).

[Source:Uniprot/SWISPROT;Acc:P51965]

AGTTAATTTTAACTATATAACACCATACCTTTTGGTCAATTTTCAATTTTGTCCCTTTTCTCCCATTTTTCCTCAGTC  
TCCATATATTTGTCTCTTAG

In100 candidate928 (in intron):

LOCUS ENSG00000170142

DESCRIPTION Ubiquitin-conjugating enzyme E2 E1 (EC 6.3.2.19) (Ubiquitinproein  
ligase E1) (Ubiquitin carrier protein E1) (UbcH6).

[Source:Uniprot/SWISPROT;Acc:P51965]

TACCTCCTTTTTTAAATAAACACAAATGGTAACTTGCTGTAAACACTGTTCTGTACCTTGGTTTTTTAACTTCAGATATC  
TTGGACTTTCCCCAGTGTTT

In100 candidate929 (in intron):

LOCUS ENSG00000141968

DESCRIPTION Proto-oncogene vav. [Source:Uniprot/SWISSPROT;Acc:P15498]

GCCATCGTGCCTGGCCTGAAGGCTTTTATTTTAAACCAATTTTCATATATATGTTTTTCTTTTTTTTTAACTTCAGGA  
ATTTCTAATTTTTTTAATTT



In100 candidate930 (in intron):

LOCUS ENSG00000206579

DESCRIPTION XK-related protein 4. [Source:Uniprot/SWISSPROT;Acc:Q5GH76]

GCTATCCTGATTGTCCTCATATTATCTAACTAATTGTTTCCATCATTTACTTTAGTCAACTAGTTCTCTCTTTCAGTTG  
ACTCCCTTTTTCTAGGTGCT

In100 candidate931 (in intron):

LOCUS ENSG00000206579

DESCRIPTION XK-related protein 4. [Source:Uniprot/SWISSPROT;Acc:Q5GH76]

ATTTTTGGTCATTGCCTCCTCCTGCCTTCTTATAACACCTAAACCACTGACTATCCCTCTTCTATTTTGCAGATTCGAGT  
TCTCTCTTCCAATAAATTCT

In100 candidate932 (in intron):

LOCUS ENSG00000052126

DESCRIPTION Pleckstrin homology domain-containing family A member 5

(Phosphoinositol 3-phosphate-binding protein 2) (PEPP-2).

[Source:Uniprot/SWISSPROTAcc:Q9HAU0]

ATTGTTACATATGTGAATACTTTTGTCAAAAGTCGTTGATGTATAACTAAAATTTGTCAATTTATTCTTCAGTGAAGTTT  
TTTTTTTAATATCCTCACTT

In100 candidate933 (in intron):

LOCUS ENSG00000171427

DESCRIPTION

TCCGTCATATATATTGTGAATATGTTTCTTATTTTGTGCTTTTAAACATTGTTGATGGTGTTTTTATTGCCAGAC  
TTTTTTTTTATGTACATGGT

In100 candidate934 (in intron):

LOCUS ENSG00000137574

DESCRIPTION Putative RNA methyltransferase NCOA6IP (EC 2.1.1.-) (Nuclear reeceptor coactivator 6-interacting protein) (PRIP-interacting protein with metyltransferase motif) (PIPMT) (PIMT) (CLL-associated antigen KW-2) (Hepatocelular carcinoma-associated antigen 137)

[Source:Uniprot/SWISSPROT;Acc:Q96RS]

TATATATTTATATTTCCCTAACAAAGGGGATAGGGTTTTCGTTTGTTTGTTTGTTTGTTTACTATTTATTTATTGCAGTC  
TACTATGTAATTTCTACTTT

In100 candidate935 (in intron):

LOCUS ENSG00000137574

DESCRIPTION Putative RNA methyltransferase NCOA6IP (EC 2.1.1.-) (Nuclear reeceptor coactivator 6-interacting protein) (PRIP-interacting protein with metyltransferase motif) (PIPMT) (PIMT) (CLL-associated antigen KW-2) (Hepatocelular carcinoma-associated antigen 137)

[Source:Uniprot/SWISSPROT;Acc:Q96RS]

AATTTCACTGTAATGTTGCTAACTGGGTTTTTCCTTTCTCTCTTATTTGATACTATCAGAACTAGCCCTAGTATTCTGAT  
GTTTTTTGTGTTTTTTTATTC

In100 candidate936 (in intron):

LOCUS ENSG00000137574

DESCRIPTION Putative RNA methyltransferase NCOA6IP (EC 2.1.1.-) (Nuclear reeceptor coactivator 6-interacting protein) (PRIP-interacting protein with metyltransferase motif) (PIPMT) (PIMT) (CLL-associated antigen KW-2) (Hepatocelular carcinoma-associated antigen 137)

[Source:Uniprot/SWISSPROT;Acc:Q96RS]

GAGACTCCATCTCAAAAAATAATAATAATAACTATATTTATAGTACCTTTATTTTTTTTTTTCAAGTAAACTTCAGAA  
ATGGTTTTTCTTTTCTTTAA

In100 candidate937 (in intron):

LOCUS ENSG00000088808

DESCRIPTION Apoptosis-stimulating of p53 protein 1 (Protein phosphatase 1 rgulatory subunit 13B). [Source:Uniprot/SWISSPROT;Acc:Q96KQ4]

AGTCACCTAGGAGCATGGAGTTGGGGAGTAGATAGGGATTAACTGCCTCTTAAATATTGTTCACTCAGTCTGCCTTATT  
TTCAGTCCCTACATTTTATT

In100 candidate938 (in intron):

LOCUS ENSG00000156414

DESCRIPTION tudor domain containing 9

[Source:RefSeq\_peptide;Acc:NP\_694591]EXON

CTCCTCCTCTTTCCCTCTGAAGCACTGGTTATGTGAATCGGCTAACTGATTTAGTTATGTTATTATTTCTAATCTCAGGC  
TTGTTTCTTTTCAGCGTTGT

In100 candidate939 (in intron):

LOCUS ENSG00000156414

DESCRIPTION tudor domain containing 9

[Source:RefSeq\_peptide;Acc:NP\_694591]EXON

AGCTCTTTTAGATAACGGGCTTAAAAGAAATGTAATCTGTTACCCTCCATTTTATTGTTTTTTTTTTTTTGGTCAGGCTTT  
GCTGTTCTTCTAAACTTATT

In100 candidate940 (in intron):

LOCUS ENSG00000151090

DESCRIPTION Thyroid hormone receptor beta-1.

[Source:Uniprot/SWISSPROT;Acc:10828]

AGATAAATACTTTTATAACTTTTAAAGATTTTGGCTGTTGTTGTTTCTATTTGTTGTTGTCAGATTGTTTTCTCTAATCAA  
TTCATCTATTCAAGTGTCT

In100 candidate941 (in intron):

LOCUS ENSG00000151090

DESCRIPTION Thyroid hormone receptor beta-1.

[Source:Uniprot/SWISSPROT;Acc:10828]

AGCTCCTGGATTCGTAACTTTCTGAAGGGTTTTGTGTCTCTATTTCTTCAGTTCTGCTCTGATTTTAGTTATTTCTT  
GCCTTCTGCTAGCTTTTGAA

In100 candidate942 (in intron):

LOCUS ENSG00000151090

DESCRIPTION Thyroid hormone receptor beta-1.

[Source:Uniprot/SWISSPROT;Acc:10828]

ATGTATTTTCCTATAGATCTTAAAAAGATCTATTTTCATATTCTATAACCTAAAATTAAGATATTTAGTTTCTTCTCAGAG  
TTTTGCTTTTGTTTTGTTTT

In100 candidate943 (in intron):

LOCUS ENSG00000198920

DESCRIPTION Uncharacterized protein KIAA0753.

[Source:Uniprot/SWISSPROT;AccQ2KHM9]

AGTTCCTGTAGATAACTAATCTCATTAGTCTCTGATTTTTGTTTTCTGTTTCTTTTGCACAAGTGATTCAGATGTATA  
TATATTTTCTCATGTCTTCT

In100 candidate944 (in intron):

LOCUS ENSG00000108590

DESCRIPTION Mediator of RNA polymerase II transcription subunit 31 (Mediator  
complex subunit SOH1) (hSOH1). [Source:Uniprot/SWISSPROT;Acc:Q9Y3C7]

TCTCCGTTTGTGTTGCTGTTTTCTTTGATGATTTCTCTTTAACTTTAGAGAACTTCTAACTTACTCCTTTTAATCAGGG  
CTCCGCTTTTCTTAGATTTCT

In100 candidate945 (in intron):

LOCUS ENSG00000077092

DESCRIPTION Retinoic acid receptor beta (RAR-beta) (RAR-epsilon) (HBVactivated  
protein). [Source:Uniprot/SWISSPROT;Acc:P10826]

TATCATTGTGTTTTGTTTTCTGTAGTTGTAACCATTTGACCCTTTCTTTCTTATGGTGTGTTTGCTCTACCAGTGTTT  
TTTATACTTTTGTGAGTTTT

In100 candidate946 (in intron):

LOCUS ENSG00000077092

DESCRIPTION Retinoic acid receptor beta (RAR-beta) (RAR-epsilon) (HBVactivated

protein). [Source:Uniprot/SWISSPROT;Acc:P10826]

TTTCTGAGTTTAAATTGTTTTTCCTAACTCTACCACTTACTTCTTTGATCTGTCCTTATCACCTCTTGTTTCAGTGTCTCT  
TGTTTTTTAGAATAACTTTCT

In100 candidate947 (in intron):

LOCUS ENSG00000077092

DESCRIPTION Retinoic acid receptor beta (RAR-beta) (RAR-epsilon) (HBVactivated  
protein). [Source:Uniprot/SWISSPROT;Acc:P10826]

ACATCGTGAACCTCCTCTGTTTGTGGGTAAGTCCATCAACCTGTCTTTTCAAGATACACTTCTTTCATCAGGAACCTCT  
CTTTGTAAATTGTTATTTCC

In100 candidate948 (in intron):

LOCUS ENSG00000171105

DESCRIPTION Insulin receptor precursor (EC 2.7.10.1) (IR) (CD220 antigen)  
[contains: Insulin receptor subunit alpha; Insulin receptor subunit beta].  
[Source:Uniprot/SWISSPROT;Acc:P06213]

ATTCATGCTCTCAACCCTGTATCTAGAACCCTAAATATAACTGGTGTATATAATGAGATTTTTTTTTTTCTCTCAGGC  
CTCTCTTGTGTTAATTTCTG

In100 candidate949 (in intron):

LOCUS ENSG00000205754

DESCRIPTION liver-specific organic anion transporter 3TM12

[Source:RefSeq\_ptide;Acc:NP\_001009562]

ATAAAGAGGATAATGAAGATACAAAAATGGTACAATAGTAACATTGTCTATGTTGGGCTATGTTTCTTCTATCCCCAGTT  
TTTTAAAGTTTTTTTTTTAT

In100 candidate950 (in intron):

LOCUS ENSG00000134538

DESCRIPTION Solute carrier organic anion transporter family member 1B1 (Solute  
carrier family 21 member 6) (Sodium-independent organic anion-transporting  
polypeptide 2) (OATP 2) (Liver-specific organic anion transporter 1) (LS-1)  
(OATP-C). [Source:Uniprot/SWISSPROT;Acc:Q9Y6L6]

GCCTATTGACATTATATAGTCCTTCGATTAACCATTTTCCCCCTTTCCTTCTGATTTTCTTAGATGTTCTTGGCAGCTC  
TGTCACCTCAGCTTTATTGCT

In100 candidate951 (in intron):

LOCUS ENSG00000134538

DESCRIPTION Solute carrier organic anion transporter family member 1B1 (Solute  
carrier family 21 member 6) (Sodium-independent organic anion-transporting  
polypeptide 2) (OATP 2) (Liver-specific organic anion transporter 1) (LS-1)  
(OATP-C). [Source:Uniprot/SWISSPROT;Acc:Q9Y6L6]

AGTATGTAGCATTTTCTAGACTAGCTTATTTAACTTAATCACATGCATTTAAATTTCTCCAGGTGTTTCAATTGCTTGAT  
AGCTCATTTCTTTTATTGCT

In100 candidate952 (in intron):

LOCUS ENSG00000152932

DESCRIPTION Ras-related protein Rab-3C. [Source:Uniprot/SWISSPROT;Acc:Q96E1]

CCATGTAACCTGATGGGAAATGTCTGCTCATTTCTCACGGCCTCCGTTCAAAGTTTCTCTTACTGTTTTAGTTTCCAGTC  
AGGGTTCTCTTGTTTTTTTC

In100 candidate953 (in intron):

LOCUS ENSG00000084453

DESCRIPTION Solute carrier organic anion transporter family member 1A2 (Solte  
carrier family 21 member 3) (Sodium-independent organic anion transporte)  
(Organic anion-transporting polypeptide 1) (OATP1) (OATP- A).

[Source:Unirot/SWISSPROT;Acc:P46721]

TATTTATAACTTTTATGTCCTCTTGCTTAATTAATCCTTTTATCCTTATATAATGATCTTCTTCGTCTCTTCTTACAGTT  
TTTTTCTTAAAATCTATTTT

In100 candidate954 (in intron):

LOCUS ENSG00000113448

DESCRIPTION cAMP-specific 3',5'-cyclic phosphodiesterase 4D (EC 3.1.4.17)  
(PDE3) (PDE43). [Source:Uniprot/SWISSPROT;Acc:Q08499]

ATACACTTGCTGTGATAACATTCTTTTTACTTTTGTAATGCTTGAAATTTTCATATCTTTTTTTCCCCAGAACTTTTTC  
TTTCCCCCAGAGCTTTTAAT

In100 candidate955 (in intron):

LOCUS ENSG00000113448





In100 candidate959 (in intron):

LOCUS ENSG00000132463

DESCRIPTION G-rich sequence factor 1 (GRSF-1).

[Source:Uniprot/SWISSPROT;Ac:Q12849]

TGTAGTGAGCCATCAAATGCCATAATTTAGATTAACAATTTTTTTTCGACTGCTCCTTTTTTTTTTTTTTTGAGACAGAG  
TTTCACTCTTTTTGCCTAGG

In100 candidate960 (in intron):

LOCUS ENSG00000198846

DESCRIPTION Thymus high mobility group box protein TOX.

[Source:Uniprot/SWISPROT;Acc:O94900]

TGCTGGATAATTAAAAAGACTGTATATCATGGCATTAAACCACTAGTTTGATTTATTTGTCACCAGTGTTTCCTGACTCAG  
TTTATTTTAGGGCTTTTTTTT

In100 candidate961 (in intron):

LOCUS ENSG00000198846

DESCRIPTION Thymus high mobility group box protein TOX.

[Source:Uniprot/SWISPROT;Acc:O94900]

AACATTATTACTTTTTCACTTCCAACGTGTAACTTTAACCATATATCTTTTTTCCTCACAGTTTCTTGTTTTTCTCTCT  
TGTTTTGTGTGCCCTCTACC

In100 candidate962 (in intron):

LOCUS ENSG00000080493

DESCRIPTION Electrogenic sodium bicarbonate cotransporter 1 (Sodium bicarboate cotransporter) (Na(+)/HCO<sub>3</sub>(-) cotransporter) (Solute carrier family 4 member 4) (kNBC1). [Source:Uniprot/SWISSPROT;Acc:Q9Y6R1]

TTGTCTCAACTGGTTATGGTTAATTTTATTTGTGATTATCTATTAGAGGTAACACTGGTATTTATGCTCTAATTTTCAGTC  
ACTTGTTTGATGACCTTTCT

In100 candidate963 (in intron):

LOCUS ENSG00000080493

DESCRIPTION Electrogenic sodium bicarbonate cotransporter 1 (Sodium bicarboate cotransporter) (Na(+)/HCO<sub>3</sub>(-) cotransporter) (Solute carrier family 4 member 4) (kNBC1). [Source:Uniprot/SWISSPROT;Acc:Q9Y6R1]

GTGTCTGATAACCATAGTATATAATTCTCCTTTAAGGTTATTTCTAATTTCTGTTTTTACCCCCTCTTGGGATTCCAGTC  
ATTTGATCTTGTCTTCTGTT

In100 candidate964 (in intron):

LOCUS ENSG00000080493

DESCRIPTION Electrogenic sodium bicarbonate cotransporter 1 (Sodium bicarboate cotransporter) (Na(+)/HCO<sub>3</sub>(-) cotransporter) (Solute carrier family 4 member 4) (kNBC1). [Source:Uniprot/SWISSPROT;Acc:Q9Y6R1]

GATAACTCCCAAATTCCTATTTTTGCCCCTACTTTCATTTTTCCTTTTTATTTCTACTCTCATAATCCTATAGACTCAGTC  
CTTTTATTTTATGCCTAGAC

In100 candidate965 (in intron):

LOCUS ENSG00000164181

DESCRIPTION ELOVL family member 7, elongation of long chain fatty acids

[Source:RefSeq\_peptide;Acc:NP\_079206]

AGGGTTTTTACAAACCACTGGATAACGTTCACTCTGAGTGTTACCTTCCTTCGCCTTCTCATTTTTTTTCTATGCAGTTT  
TGCTTTCTTTTCCCTCATAT

In100 candidate966 (in intron):

LOCUS ENSG00000178741

DESCRIPTION Cytochrome c oxidase subunit 5A, mitochondrial precursor (EC 1..3.1) (Cytochrome c oxidase polypeptide Va).

[Source:Uniprot/SWISSPROT;Acc:20674]

ATAATATCTCCTTAATGTCCTCATTTAGGCTTCATTAACCTCTACGCATTTCTCTGGCTGTTTTTAGGCTGTTTTCCAGTT  
GAATCTCTTTTATTTTGTT

In100 candidate967 (in intron):

LOCUS ENSG00000171316

DESCRIPTION Chromodomain-helicase-DNA-binding protein 7 (EC 3.6.1.-)  
(ATPependent

helicase CHD7) (CHD-7) (Fragment). [Source:Uniprot/SWISSPROT;Acc:QP2D1]

TGAAAAGGGATTCATACCCACGCCTTATTGATAACTTTATTGAGGTGCTTTTTTCATTCTTTTGTGTATTATTTGACAGAG  
TGTTCTGTTTTTTTGCTCTG

In100 candidate968 (in intron):

LOCUS ENSG00000164182

DESCRIPTION Mimitin, mitochondrial precursor (Myc-induced mitochondrial proein) (MMTN) (B17.2-like) (B17.2L) (NDUFA12-like protein).

[Source:Uniprot/SISSPROT;Acc:Q8N183]

GGCTATTTTAATCTGAAGTTTTCATATTTAATTTGTAACAAATTGAAAACACATTTTTTTCATTCATTTTGTCTCAGCT  
ACTTATAATCTTCCAATCTT

In100 candidate969 (in intron):

LOCUS ENSG00000164182

DESCRIPTION Mimitin, mitochondrial precursor (Myc-induced mitochondrial proein) (MMTN) (B17.2-like) (B17.2L) (NDUFA12-like protein).

[Source:Uniprot/SISSPROT;Acc:Q8N183]

TATTTAACTTTCTAATGTGTTTACCAATATCTTTTCTCGTAACATATTCTTGCATTCCATTCTCCTTTCTATGCTCAGTT  
TTCCTTCTTTACACATATAT

In100 candidate970 (in intron):

LOCUS ENSG00000164182

DESCRIPTION Mimitin, mitochondrial precursor (Myc-induced mitochondrial proein) (MMTN) (B17.2-like) (B17.2L) (NDUFA12-like protein).

[Source:Uniprot/SISSPROT;Acc:Q8N183]

AACTCCATAACATTTGAGGTCATGTTTCTTAATTGATGCTCTCTTTGCAGCTATAACTTTTTTTTTTTCATTTTCATTTTAT  
ATGCTTGCTGTCATTTGCCC

In100 candidate971 (in intron):

LOCUS ENSG00000198363

DESCRIPTION Aspartyl/asparaginyl beta-hydroxylase (EC 1.14.11.16) (Aspartat beta- hydroxylase) (ASP beta-hydroxylase) (Peptide-aspartate beta- dioxygease).

[Source:Uniprot/SWISSPROT;Acc:Q12797]

ACTTTTATTTATGATACCTTTATAGTCTTAGAATAACTATAGAAAGGTTTAAATTATTCAGATTAGAATGTACTTTCAT  
TTTATATCACACTTTTTTTC

In100 candidate972 (in intron):

LOCUS ENSG00000139617

DESCRIPTION phosphonoformate immuno-associated protein 5

[Source:RefSeq\_peptide;Acc:NP\_055702]

TGTTTTCATCTGTGGAACCTAGTGGTTGAATTCTAACTCCTGAGAAAATTTCCACATCTTGCATTTTGCTTCAGGCT  
TCTTTTCCCATAGTGTAAT

In100 candidate973 (in intron):

LOCUS ENSG00000139617

DESCRIPTION phosphonoformate immuno-associated protein 5

[Source:RefSeq\_peptide;Acc:NP\_055702]

TTCTGCTGATAAATCCACTGTTAATCTGATAGGAGTTCCTTATATGTAAGTAGATGTTTTTTTCTTGCCATTTTCAGAA  
TTGTCTCTTTGACTTTTGAC

In100 candidate974 (in intron):

LOCUS ENSG00000163512

DESCRIPTION 5-azacytidine induced 2 [Source:RefSeq\_peptide;Acc:NP\_071906]

GTTTTTAAACATTGTCCTAGTATTTACATTATTCTTAACTATAACTTTTTTTCCTTTTCACTTATTCAGTGAGACATTTG  
TCACTCATATTTTTTTTTTCTT

In100 candidate975 (in intron):

LOCUS ENSG00000163512

DESCRIPTION 5-azacytidine induced 2 [Source:RefSeq\_peptide;Acc:NP\_071906]

GGTAAATATTTGTAGGAGAGGATTTAACAACCTGGAGTTATATCCAAATATTTTTCTTTCATTTTCAGGTTTACTTACC  
TCCATAGCTGTATGTATTTT

In100 candidate976 (in intron):

LOCUS ENSG00000163512

DESCRIPTION 5-azacytidine induced 2 [Source:RefSeq\_peptide;Acc:NP\_071906]

TTTTTATGTTAACCTCATCTCCACTGCATTTTGTTTTGTTTTCTATTTTTTCGCCTCATCATTTCTGCCTGTTTGCAGTT  
TATGTTCTTGTGTTTTGTTA

In100 candidate977 (in intron):

LOCUS ENSG00000156140

DESCRIPTION ADAMTS-3 precursor (EC 3.4.24.-) (A disintegrin and  
metalloproteinase with thrombospondin motifs 3) (ADAM-TS 3) (ADAM-TS3)  
(Procollagen II mino propeptide-processing enzyme) (Procollagen II N-proteinase)  
(PC II-NP) [Source:Uniprot/SWISSPROT;Acc:O15072]

GTAATTAACTACCAAATATTCTTCTCATGATTCCACTCTATTTCTTTCTACTCTATGTTGACTTTTTATATAACTCAGAT  
CATAATATTTTCATATTTTTT

In100 candidate978 (in intron):

LOCUS ENSG00000083642

DESCRIPTION androgen-induced prostate proliferative shutoff associated protein

[Source:RefSeq\_peptide;Acc:NP\_055847]

AATTAAAAATAGGAGTAAGATACTGAGATAATAACCCCACTTCTCTCTTCTGTTTTTCTTTTTCATTCACACATACAGAC  
ACATTCTTTTTTTTTTTTAT

In100 candidate979 (in intron):

LOCUS ENSG00000083642

DESCRIPTION androgen-induced prostate proliferative shutoff associated protein

[Source:RefSeq\_peptide;Acc:NP\_055847]

ATTCTCTCATAACTAATTCTTCTTTTTATGTTTTTGATTCCATTTTCATCCTTCCTGCTACAACACCTTACGCTGTCAGTT  
ATTCCTTTATTTCTCAAATT

In100 candidate980 (in intron):

LOCUS ENSG00000205625

DESCRIPTION

ATAGTTGATTAACAAAACCTTGAAAATTTCTAGCTG TTCCTTGCCTGCTATTTGTTTTTCCTTTTCTTGTGCTATCAGCC  
AGACCTTGTGGTTCTTTTTT

In100 candidate981 (in intron):

LOCUS ENSG00000206559

DESCRIPTION zinc finger, CW type with PWWP domain 2

[Source:RefSeq\_peptide;cc:NP\_001035522]



GTTATACCCCCTTTTAACATTTTTTATTGTTTCTATTTGATTCTTCTCTCTTTTCTTCTTTATTAGTCTCGCTAGCAGTC  
TATCAATTTTGTTGATCTTT

In100 candidate982 (in intron):

LOCUS ENSG00000144642

DESCRIPTION RNA-binding motif, single-stranded-interacting protein 3.

[Soure:Uniprot/SWISSPROT;Acc:Q6XE24]

ACTCTTTCTCTACCTCATGTTTTAAGGCAAATAACTCTTATATTTGCCCTTTTGATACTACTTTCTAGATCTTGTCAGCA  
TGCTTCATTGCTTTCTACTC

In100 candidate983 (in intron):

LOCUS ENSG00000144642

DESCRIPTION RNA-binding motif, single-stranded-interacting protein 3.

[Soure:Uniprot/SWISSPROT;Acc:Q6XE24]

TTTTTTAACGGACTTTATTCTCCTTTAATTTTTTATGTTCTCCTTGAAAACCTTAAGCTTTTTTACCCAGAGTGCTTAATT  
ATTCATTCACTCACTCATTC

In100 candidate984 (in intron):

LOCUS ENSG00000144642

DESCRIPTION RNA-binding motif, single-stranded-interacting protein 3.

[Soure:Uniprot/SWISSPROT;Acc:Q6XE24]

AGTAACTCACATGGCATGCTCTTAGCATCATCTAGCACAAAGCTTTGTTTTCTTCTGTTCAACTTCCTTTCAGAGGTGCAT  
TTTTACAACCTCCCTCTATT

In100 candidate985 (in intron):

LOCUS ENSG00000132466

DESCRIPTION ankyrin repeat domain protein 17 isoform b

[Source:RefSeq\_peptie;Acc:NP\_942592]

AGTTACACGTTTTTAGATATTTTGATATTGTCCTAAAAATAACATTGCCTCTGTACATCTTTTTTCAGCTGTTTTTCTCT  
TTATTGTTTAGTTTTGCCAT

In100 candidate986 (in intron):

LOCUS ENSG00000086200

DESCRIPTION Importin-11 (Imp11) (Ran-binding protein 11) (RanBP11).

[SourceUniprot/SWISSPROT;Acc:Q9UI26]

CGATTATGAAGAAAAGAAACAACTAACACCAAGCACTCTTCATCATCCCCACATTTTGATTTTTTGATGTCTCAGTT  
TATATCTTTTTATATTGCCA

In100 candidate987 (in intron):

LOCUS ENSG00000111728

DESCRIPTION Alpha-N-acetylneuraminide alpha-2,8-sialyltransferase (EC  
2.4.9.8) (Ganglioside GD3 synthase) (Ganglioside GT3 synthase) (Alpha-2,8-  
sialyltransferase 8A) (ST8Sia I). [Source:Uniprot/SWISSPROT;Acc:Q92185]

CAAAATGCACATTGCAATTCTCTGCTTTCTCTAACACTGTCTTTTTTCTTCCTATTTGTTATTTATTCATTCATTCAGAT  
TTATTCATTTATTTTAATTA

In100 candidate988 (in intron):

LOCUS ENSG00000205485

DESCRIPTION

GCAAACCTACACATGTATCCCTGAACCTAAAATATAACTTAAAAATAAATATTTTCTTTTCATTTTTTGTATTACCAGTT  
TAGTTTTCTTTTTTACCTCT

In100 candidate989 (in intron):

LOCUS ENSG00000172817

DESCRIPTION Cytochrome P450 7B1 (EC 1.14.13.100) (25-hydroxycholesterol 7-  
apha- hydroxylase) (Oxysterol 7-alpha-hydroxylase).

[Source:Uniprot/SWISSPRO;Acc:075881]

TATATAAGGATCCCTTTTACTCCATTTTCCAATAACACATTCCTTAGTTCTTCATTTTCATGTGAGCCTTCACCAGCAGTG  
CCTTTAACATTTTCCTATTTTC

In100 candidate990 (in intron):

LOCUS ENSG00000172817

DESCRIPTION Cytochrome P450 7B1 (EC 1.14.13.100) (25-hydroxycholesterol 7-  
apha- hydroxylase) (Oxysterol 7-alpha-hydroxylase).

[Source:Uniprot/SWISSPRO;Acc:075881]

TTGGTGATTTTCTGGACTCTATGTTATATCATGGCTTGTGGAAGCTTAACCCTGAACTCTGCTTTTATCTTCACACAGAA  
TTCTCCCTGTGTTTGTGTCT

In100 candidate991 (in intron):

LOCUS ENSG00000172817

DESCRIPTION Cytochrome P450 7B1 (EC 1.14.13.100) (25-hydroxycholesterol 7-  
apha- hydroxylase) (Oxysterol 7-alpha-hydroxylase).

[Source:Uniprot/SWISSPRO;Acc:075881]

GGTAACATTCTCTTCATCATTTCTCATTTGTTTTATTTGAATCTTCTGTCTTTTCTTCTTTATTAGTCTAGGTAGCAGTA

TATCTATCTTATTAATTTT

In100 candidate992 (in intron):

LOCUS ENSG00000172817

DESCRIPTION Cytochrome P450 7B1 (EC 1.14.13.100) (25-hydroxycholesterol 7-  
apha- hydroxylase) (Oxysterol 7-alpha-hydroxylase).

[Source:Uniprot/SWISSPRO;Acc:O75881]

CCTCTTCTTAACTAAAGAGAAATGTCTTAAACCTCTTTACACTTTACATCCATTTTATGTATTTAGATTCTTCTCCAGTA  
TTTCATTTTATTTATTTTCAT

In100 candidate993 (in intron):

LOCUS ENSG00000134532

DESCRIPTION Transcription factor SOX-5. [Source:Uniprot/SWISSPROT;Acc:P3571]

TATTATATACTTACAAATTAGTGATTCTTTAACTTTTAGATATGCTTAAGTTCCTATTTGTTCAACTTCCAGAAAGTCTT  
TCTTTTAAGATTTTATCCTC

In100 candidate994 (in intron):

LOCUS ENSG00000134532

DESCRIPTION Transcription factor SOX-5. [Source:Uniprot/SWISSPROT;Acc:P3571]

AGTAGATAACATTTATTGAGCATATGTTTTTTTTTCAGGCATTGCGCTTTACATGTTTTATCTCTTTTAGCACTTTTAAT  
CCTTGCAACTACTCTATTTA

In100 candidate995 (in intron):

LOCUS ENSG00000066855

DESCRIPTION Mitochondrial fission regulator 1 (Chondrocyte protein with a  
ply- proline region). [Source:Uniprot/SWISSPROT;Acc:Q15390]

AGAGTAACTTTGCTTCTTAACATTCTTTGTATACTATTCATATTTTAATATTTTATCTTCCTTTCTACTTACCAGTTT  
CTAATCTTTGCCATCCTTTT

In100 candidate996 (in intron):

LOCUS ENSG00000172915

DESCRIPTION Protein neurobeachin (Lysosomal-trafficcking regulator 2) (Proten  
BCL8B). [Source:Uniprot/SWISSPROT;Acc:Q8NFP9]

ATTTTAAATGCTAGTAAAATGTTAGTAATGTCCCCTTACATTAACCTTAACTCTGCTTTCCTATAACTGATCTTCAGTG  
GTCCCAGTTCTTTTTCTCTA

In100 candidate997 (in intron):

LOCUS ENSG00000172915

DESCRIPTION Protein neurobeachin (Lysosomal-trafficcking regulator 2) (Proten  
BCL8B). [Source:Uniprot/SWISSPROT;Acc:Q8NFP9]

ATCCTGTTTTGGTACTTCCATTAACAATTATTTAGATAATTTTCATTGCCTCTGTCTTGTTTCAGTCTACCATTTCTTAG  
ATATGGGTCTATCTCTTTTT

In100 candidate998 (in intron):

LOCUS ENSG00000172915

DESCRIPTION Protein neurobeachin (Lysosomal-trafficcking regulator 2) (Proten  
BCL8B). [Source:Uniprot/SWISSPROT;Acc:Q8NFP9]

GGAGACCTGTTGTGTGCACCACTAACCCCATCCCATCTCTTTTGTGTGGCTCTGCTTCCTCAGAACTTCTGCTGCCTT

ATGATTTCTGTTGACTGCTT

In100 candidate999 (in intron):

LOCUS ENSG00000172915

DESCRIPTION Protein neurobeachin (Lysosomal-trafficcking regulator 2) (Proten BCL8B). [Source:Uniprot/SWISSPROT;Acc:Q8NFP9]

CTTGAAGATGACTTGTAATAATTGATGGCTAACTTATCCTGCGGTTTTCTAAACTCTGTTTTTTTTCTTCTTACCACAGCC  
TCAGTTATGTTTAATTTCCC

In100 candidate1000 (in intron):

LOCUS ENSG00000205268

DESCRIPTION High-affinity cAMP-specific 3',5'-cyclic phosphodiesterase 7A (C 3.1.4.17) (HCP1) (TM22). [Source:Uniprot/SWISSPROT;Acc:Q13946]

TTAATGAAGTCAAGCATTTTTTTTATATTTTTTTTAACCTTGTGAATAGTATATTTATGTCCTACCTGTTTTTCTACAGCT  
TTTTAGTCTTTTTCTAATTG

In100 candidate1001 (in intron):

LOCUS ENSG00000135205

DESCRIPTION CDNA FLJ31980 fis, clone NT2RP7008487, weakly similar to TRICHOYALIN. [Source:Uniprot/SPTREMBL;Acc:Q96MS1]

CTTTTAGGATTACTCTAAAATTTATGGGTCTCACAAGTTTTTAACATACTGTGTATAACCTACTTTATATTCCTTCAGTT  
GTCTTTGTCTTTTAACCTAC

In100 candidate1002 (in intron):

LOCUS ENSG00000135205

DESCRIPTION CDNA FLJ31980 fis, clone NT2RP7008487, weakly similar to  
TRICHOYALIN. [Source:Uniprot/SPTREMBL;Acc:Q96MS1]

TCTCTCTTTTTATGCCTTTTGTGGTTTAACTAAGCATTTAATATAATTCCATTTTCTCTCCTTTCTTAGTATATCAGTT  
GTACATCTTTTTTTTACTTTA

In100 candidate1003 (in intron):

LOCUS ENSG00000186479

DESCRIPTION R7 binding protein [Source:RefSeq\_peptide;Acc:NP\_001025046]

TTAAAGATTGGGGAAATTCACATATCTCAATAAACCTAACATGATTTTGTCCCCCAAATTTTATTTATTTTCATCAGAT  
TTATCGTTTTTCTAGCCTGT

In100 candidate1004 (in intron):

LOCUS ENSG00000153006

DESCRIPTION P18SRP protein [Source:RefSeq\_peptide;Acc:NP\_776190]

GTATTCTCTTATATAGTTATATATTTATATAACACCCCTTTATATTTCTGTGACATCACTTATACTCTCTTTTTTTCAGTT  
CTAATTTTGGCCCTGTCTTT

In100 candidate1005 (in intron):

LOCUS ENSG00000186088

DESCRIPTION

TAATGACCTCTGACTCTTTCTGCTTCTGCTTAACCTTCACATGTCTTGTTTCTCATTATTTCTTAGTGATCCAGACAAGG  
AACCCCTTTCCTTATTTTTT

In100 candidate1006 (in intron):

LOCUS ENSG00000140367

DESCRIPTION Ubiquitin-conjugating enzyme E2 Q2 (EC 6.3.2.19) (Ubiquitinproein  
ligase Q2) (Ubiquitin carrier protein Q2).

[Source:Uniprot/SWISSPROT;Ac:Q8WVN8]

AACTAAGATTAAGTAAATTAACATTTCAATGTAAGTTCTTCTGGTCTTTCTTTTTCTGTGCTTATTTTCAGCGTAACTGA  
AATTCTTTCTATTCTTTTTT

In100 candidate1007 (in intron):

LOCUS ENSG00000187257

DESCRIPTION round spermatid basic protein 1-like

[Source:RefSeq\_peptide;AccNP\_940869]

TTGACATTTAATATGTCCTTAGATATTTTTTAAACTGTAAAATTAACGTGTTCAAACTTTTAGTCTTCTTTATCCAGAT  
TTGTCTTGCTATGTATGTTC

In100 candidate1008 (in intron):

LOCUS ENSG00000187257

DESCRIPTION round spermatid basic protein 1-like

[Source:RefSeq\_peptide;AccNP\_940869]

AAATAAGTTGGTTTTGTTTTTTTTTTTTCTAAAGGAATCTCTTAACTGATTTCTTATTGGTTTGCATTTTTCAGTTCCT  
GTTATAGTACCTTTTGGTTT



In100 candidate1009 (in intron):

LOCUS ENSG00000182973

DESCRIPTION CCR4-NOT transcription complex, subunit 10

[Source:RefSeq\_peptie;Acc:NP\_056257]

ACTGCCCTAAGAATTCTGTGTTGTGCCTGTTTCATTCCCTTTCTACCTATAACCACTGATCTTTTTACTGTCTCTACAGTT  
TTGCCTTTTCTACAGTGTCA

In100 candidate1010 (in intron):

LOCUS ENSG00000049192

DESCRIPTION ADAMTS-6 precursor (EC 3.4.24.-) (A disintegrin and metalloprotease with thrombospondin motifs 6) (ADAM-TS 6) (ADAM-TS6).

[Source:UniprotSWISSPROT;Acc:Q9UKP5]

CTGATTCATAACCATGGGATATCTTTCCATTGGTTTGTGTCCTCTTCAGTTTCTTTCATCAGTGTGTTTGTAGTTGTCCTT  
GTAGAGGTTTTTTCACCTCCT

In100 candidate1011 (in intron):

LOCUS ENSG00000049192

DESCRIPTION ADAMTS-6 precursor (EC 3.4.24.-) (A disintegrin and metalloprotease with thrombospondin motifs 6) (ADAM-TS 6) (ADAM-TS6).

[Source:UniprotSWISSPROT;Acc:Q9UKP5]

CGAGACTCCGTCTCCAAAAAGGAAAAAAAAAATGTTTCTAACTATAATAGTGGATTTGTGTATTTCTCTTTGCAGTTCTA  
TAAGTTTTTGGACTCACTTTT

In100 candidate1012 (in intron):

LOCUS ENSG00000049192

DESCRIPTION ADAMTS-6 precursor (EC 3.4.24.-) (A disintegrin and

metalloprotease with thrombospondin motifs 6) (ADAM-TS 6) (ADAM-TS6).

[Source:UniprotSWISSPROT;Acc:Q9UKP5]

AGGGAGGGTAGTAAAAAGCCTCAAAACAATCTCTGAGTGTGCCTGTAACTACTTGTTATTTATTCCCAATTCAGAATTT  
TCTCTAGTGACATATTCTTT

In100 candidate1013 (in intron):

LOCUS ENSG00000187391

DESCRIPTION Membrane-associated guanylate kinase, WW and PDZ domain-containing  
protein 2 (Membrane-associated guanylate kinase inverted 2) (MAGI-2) (Atrophin-1-  
interacting protein 1) (Atrophin-1-interacting protein A).

[Source:niprot/SWISSPROT;Acc:Q86UL8]

CTATTTTAACTTCATTGATTTCTGCTCTTATCTTTACTATTTCTTGTCTTCTACTTGCTTTGGACTTATTTTGCCAGAT  
TTTTTCCTAGAAATTTTACT

In100 candidate1014 (in intron):

LOCUS ENSG00000187391

DESCRIPTION Membrane-associated guanylate kinase, WW and PDZ domain-containing  
protein 2 (Membrane-associated guanylate kinase inverted 2) (MAGI-2) (Atrophin-1-  
interacting protein 1) (Atrophin-1-interacting protein A).

[Source:niprot/SWISSPROT;Acc:Q86UL8]

ATATTTACTTCAAAATAATATTGGAATATCTCTTCAATAACTTGATCCATTTCCCTGATACTGTTTTTTTTCTACAGTT  
TTTACTATCTCACTCAACTT

In100 candidate1015 (in intron):

LOCUS ENSG00000187391

DESCRIPTION Membrane-associated guanylate kinase, WW and PDZ domain-containing protein 2 (Membrane-associated guanylate kinase inverted 2) (MAGI-2) (Atrophin-1-interacting protein 1) (Atrophin-1-interacting protein A).

[Source:niprot/SWISSPROT;Acc:Q86UL8]

CATAGAGACTTTCATAACTTCATTTTAAAATCACTCCTCTCTTTTTTAATTTATGACTATGTCTCTCCGTTCTTCAGGT  
TTGTTTCATTTTAAATGTTCT

In100 candidate1016 (in intron):

LOCUS ENSG00000187391

DESCRIPTION Membrane-associated guanylate kinase, WW and PDZ domain-containing protein 2 (Membrane-associated guanylate kinase inverted 2) (MAGI-2) (Atrophin-1-interacting protein 1) (Atrophin-1-interacting protein A).

[Source:niprot/SWISSPROT;Acc:Q86UL8]

GCCAACAAAATTAACCCTTGACATTTTTTACTGATTTCCCAGTATTTGTGTTTCATTAAGAAATATTTTACTTTCTCCCGC  
ATTATCTTTTCAACTTTTTC

In100 candidate1017 (in intron):

LOCUS ENSG00000187391

DESCRIPTION Membrane-associated guanylate kinase, WW and PDZ domain-containing protein 2 (Membrane-associated guanylate kinase inverted 2) (MAGI-2) (Atrophin-1-interacting protein 1) (Atrophin-1-interacting protein A).

[Source:niprot/SWISSPROT;Acc:Q86UL8]

GCCTTTGTAACCCAAATGCTATTGTGGTGCCTCTTTATTCTCATTTCTGTCTTTTCTTTTGCCTTGCACAGTCCTCTTT

ATTCCCTCTTCATTTAAAAT

In100 candidate1018 (in intron):

LOCUS ENSG00000187391

DESCRIPTION Membrane-associated guanylate kinase, WW and PDZ domain-containing protein 2 (Membrane-associated guanylate kinase inverted 2) (MAGI-2) (Atrophin-1-interacting protein 1) (Atrophin-1-interacting protein A).

[Source:niprot/SWISSPROT;Acc:Q86UL8]

CTGAAGGCACTAACTGTGTCTTGTTCCTTTACTTCTCCAGTGCCTTGCACAAGCCTGTATAAAAATTAGTAGTTTCTT  
TTTTCTTTTTTTTTTTTTTTTT

In100 candidate1019 (in intron):

LOCUS ENSG00000110619

DESCRIPTION CysteinyI-tRNA synthetase, cytoplasmic (EC 6.1.1.16) (Cysteine tRNA ligase) (CysRS). [Source:Uniprot/SWISSPROT;Acc:P49589]

CCTTCTCCGTGTCTCCTAACCTGTCTTTCATAAAATTTTCCTTCTTGTCTCTGTTTCATTTTGGATGACTTCTTCAGTTC  
TGTCTTCCTGTTTCACAAATT

In100 candidate1020 (in intron):

LOCUS ENSG00000140374

DESCRIPTION Electron transfer flavoprotein subunit alpha, mitochondrial precursor (Alpha-ETF). [Source:Uniprot/SWISSPROT;Acc:P13804]

GATAGAGTAAGGTAAATTATTAGCATCTGTAAACCTAAGAGAAAGATAACTTTTTTCATATATTTATTTTCACACAGTATTT  
TTTAGAGTATATTTCTCTTT

In100 candidate1021 (in intron):

LOCUS ENSG00000123219

DESCRIPTION Centromere protein K (CENP-K) (Interphase centromere complex  
prtein 37) (Protein AF-5alpha) (p33). [Source:Uniprot/SWISSPROT;Acc:Q9BS16]  
TAAAAGATAAGAAAATTAACATTCTTTTTCCTATACCCTTATTTCTATTTTGTGTTATTTTTACTTTGGCAGGTTATATT  
TTATTCAGAACTTCTATTTT

In100 candidate1022 (in intron):

LOCUS ENSG00000104205

DESCRIPTION Serine/threonine-protein kinase Sgk3 (EC 2.7.11.1)  
(Serum/glucocorticoid-regulated kinase 3) (Serum/glucocorticoid- regulated  
kinase-like).[Source:Uniprot/SWISSPROT;Acc:Q96BR1]  
GTGCTTTTAATGTAACCTAAAACGAAACCTATTCATAGGGTCTATTCTCTTCTCAGAAATTGTCCCCATCCCAATTCCTT  
TTCTTATTTACTAGGTCATT

In100 candidate1023 (in intron):

LOCUS ENSG00000152936

DESCRIPTION intermediate filament tail domain containing 1  
[Source:RefSeq\_pptide;Acc:NP\_689803]  
AATAACACTGTTTCCTGTTGTTATTGGTACGTAATCATTCTTTTGCTCTCTTCTTGCTCTTCCCTTTTCAGTGTGATTTGGC  
TTTTCTTAACTTTTTACTC

In100 candidate1024 (in intron):

LOCUS ENSG00000140386

DESCRIPTION Zinc finger protein 291. [Source:Uniprot/SWISSPROT;Acc:Q9BY12]

EXON

GCCATGAATATGTGAGTTTTCTTTCTAACTTGATTCTGTTTACTTTATCTCTTGTGCCTGTTTTTATACCAGTACCACTC  
TATCTTGATTGTTGTACCTT

In100 candidate1025 (in intron):

LOCUS ENSG00000140386

DESCRIPTION Zinc finger protein 291. [Source:Uniprot/SWISSPROT;Acc:Q9BY12]

EXON

AGTTAACTATTAGAAATGTTCAAATCTCTCTTTTGTGTTCCCTGAACAGAAATTGCTTTGTTATTTTTTTTCTGCTATCT  
TTTACTGAGCCCTTACTATG

In100 candidate1026 (in intron):

LOCUS ENSG00000133083

DESCRIPTION Serine/threonine-protein kinase DCAMKL1 (EC 2.7.11.1)

(Doublecotin- like and CAM kinase-like 1). [Source:Uniprot/SWISSPROT;Acc:O15075]

CTTCTTAAGATAACATGAATTTATTAATTTTCTTGTTGTATTTTCACTTTATATTCTATTTCTTTTCCCCCAGCC  
CTTTACCCTTTCATTTATTC

In100 candidate1027 (in intron):

LOCUS ENSG00000133083

DESCRIPTION Serine/threonine-protein kinase DCAMKL1 (EC 2.7.11.1)  
(Doublecortin- like and CAM kinase-like 1). [Source:Uniprot/SWISSPROT;Acc:O15075]  
AATTTTCTACTTAGAAAATCAAGGCATTGTATAACATCTGCAATCTTTTCTTTACATTTTCTCTTCCGGTCCTCACAGGC  
CTTCCTTTTTTATTGTATTCA

In100 candidate1028 (in intron):

LOCUS ENSG00000123104

DESCRIPTION Inositol 1,4,5-trisphosphate receptor type 2 (Type 2 inositol  
14,5- trisphosphate receptor) (Type 2 InsP3 receptor) (IP3 receptor isoform )  
(InsP3R2). [Source:Uniprot/SWISSPROT;Acc:Q14571]

AGTAACCTCTGCATACACAATTCTTTCTTCAGCTGAGGAAAATTTTATCTTCTATTATCTTTGATTATTGTTTGTGTTCC  
ACTTATTCTCTCTTCCATTT

In100 candidate1029 (in intron):

LOCUS ENSG00000123104

DESCRIPTION Inositol 1,4,5-trisphosphate receptor type 2 (Type 2 inositol  
14,5- trisphosphate receptor) (Type 2 InsP3 receptor) (IP3 receptor isoform )  
(InsP3R2). [Source:Uniprot/SWISSPROT;Acc:Q14571]

AGTAACATTCATGAAGAGAATTTTGTTACACTTCCTTGCTTCATTTTTTTTTTCCTTGTGGAAATTCCTCTCTCCAGAAGTG  
AATATCTTTTTTTTTTTTCATT

In100 candidate1030 (in intron):

LOCUS ENSG00000123104

DESCRIPTION Inositol 1,4,5-trisphosphate receptor type 2 (Type 2 inositol  
14,5- trisphosphate receptor) (Type 2 InsP3 receptor) (IP3 receptor isoform )  
(InsP3R2). [Source:Uniprot/SWISSPROT;Acc:Q14571]

AGTCTTTTCTAACATTCTCTGCCCACTCTCCACTTCTTTTTCTTTTTATCTCTATGTTTTTCTGTCTTTTCACCAGCC  
AACTTTTTTTTCATGTGTTTT

In100 candidate1031 (in intron):

LOCUS ENSG00000123104

DESCRIPTION Inositol 1,4,5-trisphosphate receptor type 2 (Type 2 inositol  
14,5- trisphosphate receptor) (Type 2 InsP3 receptor) (IP3 receptor isoform )  
(InsP3R2). [Source:Uniprot/SWISSPROT;Acc:Q14571]

TAATCCATGGATGATAACATCAAAATTATTGGGAAGGGTTTGATTTATCTTCTCCTACCTTTCTGTTTTCTCTCCAGAT  
GCTTTCTGTGTTTGTGTCCT

In100 candidate1032 (in intron):

LOCUS ENSG00000123104

DESCRIPTION Inositol 1,4,5-trisphosphate receptor type 2 (Type 2 inositol  
14,5- trisphosphate receptor) (Type 2 InsP3 receptor) (IP3 receptor isoform )  
(InsP3R2). [Source:Uniprot/SWISSPROT;Acc:Q14571]

ATTATATATTTTAAACTATTTGTAACTTCCATTTCTTTTGTTTCCTTCTTCAGATCTCCAATTATGTATATGCTGAGT  
CTTCCATTCACCTGTCTTTTT

In100 candidate1033 (in intron):

LOCUS ENSG00000123104



DESCRIPTION Inositol 1,4,5-trisphosphate receptor type 2 (Type 2 inositol 14,5- trisphosphate receptor) (Type 2 InsP3 receptor) (IP3 receptor isoform ) (InsP3R2). [Source:Uniprot/SWISSPROT;Acc:Q14571]

TAACCCACACCCTGTATTTTTTTTCTATTTTTCTCTTTATGTGACAGCTATCACCACCTCCATTTCTTCACAATAGATG  
TATGTGTGTCTCCTTTCTTT

In100 candidate1034 (in intron):

LOCUS ENSG00000163539

DESCRIPTION CLIP-associating protein 2 (Cytoplasmic linker-associated protein 2) (hOrbit2). [Source:Uniprot/SWISSPROT;Acc:O75122]

TGATGTTATTTATTTCTGTAGCTCTTTTATTTTCTGTAAGTTTATTAACCTATATATTTCACTTCCTTTTAGTCAGCTTAC  
CTACGTATTTAAGTTTTCTC

In100 candidate1035 (in intron):

LOCUS ENSG00000163539

DESCRIPTION CLIP-associating protein 2 (Cytoplasmic linker-associated protein 2) (hOrbit2). [Source:Uniprot/SWISSPROT;Acc:O75122]

AGTATTATTTCCATGACTTAAAAATACACATAAATGTTATATTGTACATAACATTCTACAACCTGACTTTTTTACTCAGTG  
CTTTTTTTTTTATATTTTTTC

In100 candidate1036 (in intron):

LOCUS ENSG00000163539

DESCRIPTION CLIP-associating protein 2 (Cytoplasmic linker-associated protein 2) (hOrbit2). [Source:Uniprot/SWISSPROT;Acc:O75122]

ATTTATTCTGTGCCTGGTATTTGGCCCATGAGCCTCTGAAGTTTTCATCTAACTAATTCACCTCTTTTTGTTTTCCAGAC  
ATTATTTTAAATTCTCTACT

In100 candidate1037 (in intron):

LOCUS ENSG00000163539

DESCRIPTION CLIP-associating protein 2 (Cytoplasmic linker-associated protein 2) (hOrbit2). [Source:Uniprot/SWISSPROT;Acc:075122]

TCCTATCCATGAGCTGGGATGTTTTAACATTTGTTTGTGTCTTCTCTGATTTCTTTGAGCAGTGTTTTGTAATTCTCATTTAGAGCTCTTTCACTTCTC

In100 candidate1038 (in intron):

LOCUS ENSG00000104218

DESCRIPTION centrosome spindle pole associated protein 1 isoform a [Source:efSeq\_peptide;Acc:NP\_001070672]

AAATGCCATAAAAATTGTAGGGATATTTTAATAGAGAATAAGGTGGCTAACTTACCAAACCTATAGTTTGTCTTTTCAGCTTAATTTCCCTTCAAGGTTTC

In100 candidate1039 (in intron):

LOCUS ENSG00000104218

DESCRIPTION centrosome spindle pole associated protein 1 isoform a [Source:efSeq\_peptide;Acc:NP\_001070672]

GATCTTTGCTCCATAACTTCTAGCCATTTTAGCCTTCCTGAATTTTGCTCTTTATCTACTCAATTTAGCTCAGTTTCCTGGCCCTCTTTGGGTCTCTTT

In100 candidate1040 (in intron):

LOCUS ENSG00000104218

DESCRIPTION centrosome spindle pole associated protein 1 isoform a

[Source:efSeq\_peptide;Acc:NP\_001070672]

TCTGAAATTAACATTGCTATCATTTTCTTTCATTTATGTATGTCTGATATATATATATATATTTTGTCTATTCCTTCAGTT  
TTACCTTTGTGTCACCATAT

In100 candidate1041 (in intron):

LOCUS ENSG00000153956

DESCRIPTION Dihydropyridine-sensitive L-type calcium channel subunits alpha  
2/delta precursor [Contains: L-type calcium channel subunit alpha-2; L-typ  
calcium channel subunit delta]. [Source:Uniprot/SWISSPROT;Acc:P54289]

TCAAGCCTCTGTGTTTTCTCTAAGGCATTTTCATCCTTTTTTATAACTGGCTTCCATTTTTTTCTTTCTCTTATCAGCT  
CATCATTCTTTTAAATGCTC

In100 candidate1042 (in intron):

LOCUS ENSG00000153956

DESCRIPTION Dihydropyridine-sensitive L-type calcium channel subunits alpha  
2/delta precursor [Contains: L-type calcium channel subunit alpha-2; L-typ  
calcium channel subunit delta]. [Source:Uniprot/SWISSPROT;Acc:P54289]

TTGTTTTTGTTTTCTGGAAGTGCTAGATGATTGTTATTTAACCAAATAGTTTTTTTTTTCTTTAACTCTTAGGCCAGTC  
ATTCTATATCATTTCTATTT

In100 candidate1043 (in intron):

LOCUS ENSG00000153956

DESCRIPTION Dihydropyridine-sensitive L-type calcium channel subunits alpha

2/delta precursor [Contains: L-type calcium channel subunit alpha-2; L-type calcium channel subunit delta]. [Source:Uniprot/SWISSPROT;Acc:P54289]  
CTGTCTCACTGGCATGTCAAGACTAACATTCGCAAGTGAAGTATTATTTCTATTACTTTTCTCCATCAGCATCCTGATCT  
TCTGTTAAGTTTTGCATCTC

In100 candidate1044 (in intron):

LOCUS ENSG00000153956

DESCRIPTION Dihydropyridine-sensitive L-type calcium channel subunits alpha  
2/delta precursor [Contains: L-type calcium channel subunit alpha-2; L-type calcium channel subunit delta]. [Source:Uniprot/SWISSPROT;Acc:P54289]

TTTATTTTTTTATTGAAATTCAAAGTTAACTGATTGTCTTGTATTTCTTTTTGCTAAATTCATCAACCTTGTCTTTCAGGC  
TTTCAGTTTCTATATTTGTA

In100 candidate1045 (in intron):

LOCUS ENSG00000153956

DESCRIPTION Dihydropyridine-sensitive L-type calcium channel subunits alpha  
2/delta precursor [Contains: L-type calcium channel subunit alpha-2; L-type calcium channel subunit delta]. [Source:Uniprot/SWISSPROT;Acc:P54289]

TCAATAATTTTGATTCTATATTCATTTTTAACTCTAGAATATTTTTTCTCTGTAATTTTATTTCAACACAGCATTCCTA  
GTTTAAACCACGACTTTTTT

In100 candidate1046 (in intron):

LOCUS ENSG00000153956

DESCRIPTION Dihydropyridine-sensitive L-type calcium channel subunits alpha 2/delta precursor [Contains: L-type calcium channel subunit alpha-2; L-type calcium channel subunit delta]. [Source:Uniprot/SWISSPROT;Acc:P54289]

TGAAGATGCTCTAAGAATGATACTAGATAAATAATTCTAAAAATTGAATAACAATGATGAAACAATATTTTCTTCCAGTC  
CTCTTTTGTGTGTCTGTATA

In100 candidate1047 (in intron):

LOCUS ENSG00000163738

DESCRIPTION methylenetetrahydrofolate dehydrogenase (NADP+ dependent) 2-lik  
[Source:RefSeq\_peptide;Acc:NP\_001004346]

GATTTATCAAGTACATTTTAACTTTTATGGTTTTTTTTCTAGTTTCATTTGTTTATTGTTCAATTTCTACAGTTAAATGA  
TTCATTTTCTTATTTCTGTT

In100 candidate1048 (in intron):

LOCUS ENSG00000163738

DESCRIPTION methylenetetrahydrofolate dehydrogenase (NADP+ dependent) 2-lik  
[Source:RefSeq\_peptide;Acc:NP\_001004346]

TCTTTGCCATTAGCATAGTAGCTGGACTGTAATAACTATTTTATGAATATTTTATCTTGAACTTTTTCTGCAGCTATA  
CTCAATGTATGTCTTCTTTT

In100 candidate1049 (in intron):

LOCUS ENSG00000123213

DESCRIPTION Neurolysin, mitochondrial precursor (EC 3.4.24.16)  
(Neurotensinendopeptidase) (Mitochondrial oligopeptidase M) (Microsomal  
endopeptidase) MEP). [Source:Uniprot/SWISSPROT;Acc:Q9BYT8]

CTTATCTCCTGGCCTTAAATTAACATAAGCTGATCTCTTATTTGGAACATTCTTTTCTTTCTCTCCCATTTCCAGAGCCT  
AATACTTATTCATTTATCTT

In100 candidate1050 (in intron):

LOCUS ENSG00000066777

DESCRIPTION Brefeldin A-inhibited guanine nucleotide-exchange protein 1  
(Brfeldin A-inhibited GEP 1) (p200 ARF-GEPl) (p200 ARF guanine nucleotide  
exchnge factor). [Source:Uniprot/SWISSPROT;Acc:Q9Y6D6]

TCTACCTCTATCTCTTTCTCTGCCTCTTTGAAGACCAATAACTTTTAGAATTGCCCTTTTAAAACTATTTTCCAGATTTT  
ATAGGTGTGCTTCATTCTTT

In100 candidate1051 (in intron):

LOCUS ENSG00000120669

DESCRIPTION OTTHUMP00000018257. [Source:Uniprot/SPTREMBL;Acc:Q9H1T5]

TGAAAAGTACTATATATATAGGAGCTGTGCTTAACTACATTGTATTCTCCTGTTTTTTCTTTTGTAAGCGTTCAGTGGAG  
TGATTTTTTTTTTACTTTTT

In100 candidate1052 (in intron):

LOCUS ENSG00000064115

DESCRIPTION Transmembrane 7 superfamily member 3 precursor (Seven span  
tranmembrane protein). [Source:Uniprot/SWISSPROT;Acc:Q9NS93]

TTAGGGAAAATATATAGAGGTTAAGATTATTCTAGTCTTAACACTATTTGTGTCTTTTTTTTGGCTGTTCTTCCACAGGC  
TACTCATTCTTGATTTTTTTT

In100 candidate1053 (in intron):

LOCUS ENSG00000186472

DESCRIPTION PCLO\_HUMAN Isoform 3 of Q9Y6V0 - Homo sapiens (Human)

[Source:Uiprot/Varsplic;Acc:Q9Y6V0-3]

TTTGCTAGAGGATAGAAGAAAATACTATGGCTCTTAACCTGTAAATTTCTTCTCCTCCTGTATTTTATATCTCAGGTTTG  
GTTTTAGTTACATTATTCTT

In100 candidate1054 (in intron):

LOCUS ENSG00000165078

DESCRIPTION Carboxypeptidase A6 precursor (EC 3.4.17.1) (Carboxypeptidase B.

[Source:Uniprot/SWISSPROT;Acc:Q8N4T0]

TGAGAATAAACAAACCATATTCAAACCTATAACAATGGGAGACTTTTTATTGCTGATTCAGTCTCCTCACTCCATTATCAG  
TCTGTTTCAGATTTTCTATTT

In100 candidate1055 (in intron):

LOCUS ENSG00000165078

DESCRIPTION Carboxypeptidase A6 precursor (EC 3.4.17.1) (Carboxypeptidase B.

[Source:Uniprot/SWISSPROT;Acc:Q8N4T0]

TTGATGAATCTACATTTATGTCACTTTCTTATTGCTAACATCGGTCATTTCAATCTTCATTCTTTTGTCTTAAGCAGAT  
TTGCTAACAAATTTTCTATT

In100 candidate1056 (in intron):

LOCUS ENSG00000172995

DESCRIPTION cAMP-regulated phosphoprotein 21 (ARPP-21).

[Source:Uniprot/SWISPROT;Acc:Q9UBL0]

CCAATATAACCATAACTTTTAAATTTTGTCTGGCCTCAGACTCAGCTTTC AACAGGTCCATTTCTAACTTAGGACCTCTTG  
CCTGTTCTTTCTTTGCTTTT

In100 candidate1057 (in intron):

LOCUS ENSG00000172995

DESCRIPTION cAMP-regulated phosphoprotein 21 (ARPP-21).

[Source:Uniprot/SWISPROT;Acc:Q9UBL0]

TTATTGAGGTCACCGGTTTGTTTGTTTTTTTAACTAGGGTCTGCTGTCTTTTCTTCCTTGGCAGTTCTGCAACTGTGGT  
CATTGTCACATTTTTCTTTC

In100 candidate1058 (in intron):

LOCUS ENSG00000075213

DESCRIPTION Semaphorin-3A precursor (Semaphorin III) (Sema III).

[Source:Unprot/SWISSPROT;Acc:Q14563]

TTTTATGTAGGTTTTCTGTTAAGAACAAATCCTTACTAACAATGTCTCTGTCAAATTTTTGCTTCTTCTCTGTCCAGTTC  
TTTTAATGCACTTTCCTCCT

In100 candidate1059 (in intron):

LOCUS ENSG00000075213



DESCRIPTION Semaphorin-3A precursor (Semaphorin III) (Sema III).

[Source:Unprot/SWISSPROT;Acc:Q14563]

AAACATGAAAAATAACACTAAATCCCATTCGCTGTTACCTGTTTGGTACTTTTTCATCTTCCCTTTCATTCTCCAGCCT  
TCATAATCCTTCTTTTACCT

In100 candidate1060 (in intron):

LOCUS ENSG00000165935

DESCRIPTION

TCTATAGATGATCAATAGAGGAGTGTTGAAATCTCCAAGTAACTGTAGATATGTCTATTTCTGCTTGCAGAGCTATCA  
GTTTTTGCTTCATGTACTTT

In100 candidate1061 (in intron):

LOCUS ENSG00000165935

DESCRIPTION

TAGGTTGTCTCATAACCCATAACTCACTGATGTTCTGGGCTTTTTTTTTCTCTCTTTTCTTTCTGTGTTTCATTTTCAGAC  
TTTCTATCACTATATCTTAA

In100 candidate1062 (in intron):

LOCUS ENSG00000165084

DESCRIPTION Vest-1 protein. [Source:Uniprot/SPTREMBL;Acc:Q96Q28]

AGACACCTTTTTCTCTGCTTTATATCATGTCTAACCCCTTCTACTTCGTTCTTTTTTGCCAGATTGGCATCATTGCTC  
CTGTCTTTTTGGGTTTGTCT

In100 candidate1063 (in intron):

LOCUS ENSG00000165084

DESCRIPTION Vest-1 protein. [Source:Uniprot/SPTREMBL;Acc:Q96Q28]

TAACTTTTTTGTGATTGTTCTACATGTCCCTAAGACTGTTTTTTTTGTCTTATTTTTCTCTTTGTTGTTTCAGATTAGTTA



In100 candidate1067 (in intron):

LOCUS ENSG00000137573

DESCRIPTION Extracellular sulfatase Sulf-1 precursor (EC 3.1.6.-) (HSulf-1)

[Source:Uniprot/SWISSPROT;Acc:Q8IWU6]

AAATCTGACTCCATACCCGCTACCATTAAGTCTTATTCCACATTTTCCTTTTTTTCCTTTAAGCTCAGTTGACTTT  
TTAACGAATGTCTTTTCCTC

In100 candidate1068 (in intron):

LOCUS ENSG00000167323

DESCRIPTION Stromal interaction molecule 1 precursor.

[Source:Uniprot/SWISSROT;Acc:Q13586]

AGGGAATGGTGAAGAGGAAGTGTAACATGTTTTTGTGTCTTCAATAGCTTTTCAGCACTCTTTTTTTTTTTCCTCCTCT  
TTTCTTCTGGAGACTTTGCA

In100 candidate1069 (in intron):

LOCUS ENSG00000167323

DESCRIPTION Stromal interaction molecule 1 precursor.

[Source:Uniprot/SWISSROT;Acc:Q13586]

CATTCTCTCCTCTCCTTCTGAGAATCTAATATTTATGTTAGATCTTTTAACTGTATTCCACATGTCTCTTATGCTCAGTT  
CTGTTCTTTTTTCTCTCTGT

In100 candidate1070 (in intron):

LOCUS ENSG00000137571

DESCRIPTION Solute carrier organic anion transporter family member 5A1 (Solute carrier family 21 member 15) (Organic anion transporter polypeptide-related protein 4) (OATP-RP4) (OATPRP4). [Source:Uniprot/SWISSPROT;Acc:Q9H2Y9]

EXON

CTCATTCATAGAAAAGTCCACTCCTTTATGACCTATGATTTAACCCTGGTTACCTCTTCGACTTTATCTCCTTTCAGTC  
CCACTTGTTTATTGTGTGTT

In100 candidate1071 (in intron):

LOCUS ENSG00000140396

DESCRIPTION Nuclear receptor coactivator 2 (NCoA-2) (Transcriptional  
intermediary factor 2). [Source:Uniprot/SWISSPROT;Acc:Q15596]

CTCACTGTATTCTGTGCTATATAACCCTTTTTTCCCATGTTTATTTTCAGCACTCTAATTTAAGACATCTTTTCTCACCT  
TAACTCATCTCTGCTTCTTT

In100 candidate1072 (in intron):

LOCUS ENSG00000144674

DESCRIPTION Golgin subfamily A member 4 (Trans-Golgi p230) (256 kDa  
golgin)(Golgin-245) (Protein 72.1). [Source:Uniprot/SWISSPROT;Acc:Q13439]

AGGTTGCTTCCTTGTTTTAGTGGTAAAGACATATCTAACCTTCTATGCTTTCCTTCTGCTTTTTAAATACCTGCAGACAT  
CTGTTTCTTATCATTATATC

In100 candidate1073 (in intron):

LOCUS ENSG00000196567

DESCRIPTION similar to microtubule associated testis specific serine/threonine  
protein kinase (LOC375449), mRNA [Source:RefSeq\_dna;Acc:NM\_198828]

CTTTAGCCATTACTACACTATTTTTTAACAAGGGTAGACATATGTTTCTATATTTGCTCTTCTTTTACAGGTTTTTATGTA  
GTACGTTTCATCTACTCATTT

In100 candidate1074 (in intron):

LOCUS ENSG00000069020

DESCRIPTION Microtubule-associated serine/threonine-protein kinase 4 (EC  
2..11.1). [Source:Uniprot/SWISSPROT;Acc:O15021]

TTTAGTTTAAAACATTAAAACCATACAAACATTGTATATTTGGAACACCTAACCTCTTCTAAGTGTCTGTACCTCAGCA  
CTTTTTTTTATCTTGGGTGTT

In100 candidate1075 (in intron):

LOCUS ENSG00000133110

DESCRIPTION Periostin precursor (PN) (Osteoblast-specific factor 2) (OSF-2)  
[Source:Uniprot/SWISSPROT;Acc:Q15063]

TAGAAATAAAATTACGTTCATACTGTTTGAATAGTCCTAGTTGGTTAACTTTTTGAAAAGCTTGTATTTTACTCTCAGAA  
ATGTATAATTTTTCTCTCTC

In100 candidate1076 (in intron):

LOCUS ENSG00000123106

DESCRIPTION Coiled-coil domain-containing protein 91 (GGA-binding partner)  
p56 accessory protein). [Source:Uniprot/SWISSPROT;Acc:Q7Z6B0]

TCTTCAAAGGTTAACATTTTACCACATTGCTTTATCATTTTCTTCCCTTTCCTTCTCATTTTCTTATTCTCCTCAGTA  
TTTATTTAGTGTTCTTTTTG

In100 candidate1077 (in intron):

LOCUS ENSG00000123106

DESCRIPTION Coiled-coil domain-containing protein 91 (GGA-binding partner)

p56 accessory protein). [Source:Uniprot/SWISSPROT;Acc:Q7Z6B0]

TATCTGTAGGGTTACCACTTATTTGATTCTGTGCACTGAAACATATAACTTGTATTTGTACCTTTTTTTAATCAGTATTT  
GCACCTTTTTTATCAGTATTT

In100 candidate1078 (in intron):

LOCUS ENSG00000123106

DESCRIPTION Coiled-coil domain-containing protein 91 (GGA-binding partner)

p56 accessory protein). [Source:Uniprot/SWISSPROT;Acc:Q7Z6B0]

TCTGCTACCCCATGGGAATTATTAACCATTTGTCCTATCTTTTTATATTTGTTGGTCAATGTATTCTATTTTCTTTCAGCC  
ATTATTTTTCTAATTTTTGT

In100 candidate1079 (in intron):

LOCUS ENSG00000035115

DESCRIPTION SH3 domain containing, Ysc84-like 1

[Source:RefSeq\_peptide;Acc:P\_056492]

TTTACTCATTGAACTTGCTATATTAACCTTTTTTATTTCCCATTTTTTGTCTGTTCCATTGTTTCTGTTTCATTCAGGTT  
ACCATCTGGTGTCAATTCCT

In100 candidate1080 (in intron):

LOCUS ENSG00000085563

DESCRIPTION Multidrug resistance protein 1 (EC 3.6.3.44) (ATP-binding cassette sub-family B member 1) (P-glycoprotein 1) (CD243 antigen).

[Source:Uniprt/SWISSPROT;Acc:P08183]

TTTTTTAACAAGTCTAATTTCTCTCTGTTGTTTCAGATTAGGAAATTTCTATTGTTTTGTCTTTCAGTTCACCTGGTTCTT  
CCACTGTAACCTCCCATTTTC

In100 candidate1081 (in exon):

LOCUS ENSG00000085563

DESCRIPTION Multidrug resistance protein 1 (EC 3.6.3.44) (ATP-binding cassette sub-family B member 1) (P-glycoprotein 1) (CD243 antigen).

[Source:Uniprt/SWISSPROT;Acc:P08183]

AATAGTAACTTGTTTTCACTATTGTTTCTAGCCCTTGGAATTATTTCTTTTATTACATTTTTCCTTCAGGTAAATGTTTC  
CATTTTCACTATATTCATTT

In100 candidate1082 (in intron):

LOCUS ENSG00000085563

DESCRIPTION Multidrug resistance protein 1 (EC 3.6.3.44) (ATP-binding cassette sub-family B member 1) (P-glycoprotein 1) (CD243 antigen).

[Source:Uniprt/SWISSPROT;Acc:P08183]

TAATGACAAACGTTAGGCTTAAATTACAAATAATAATATACCTAACATTGGAAATTTCCATCATTCCTAGTTTGTTCAGAC  
TCCTTTATCTTGCTAATTG

In100 candidate1083 (in intron):

LOCUS ENSG00000087502

DESCRIPTION Endoplasmic reticulum-Golgi intermediate compartment protein

2.[Source:Uniprot/SWISSPROT;Acc:Q96RQ1]

AACATTTTGGATGTATTTTGGATGTGTCTAAAGTCTGTTTTATAACCTTTTTTAATATTTTGTATTACTTTCCAGTAG  
TTTCCTTTTCACTTTTCTTC

In100 candidate1084 (in intron):

LOCUS ENSG00000149932

DESCRIPTION

AATTAACCATATATGTGAGGATTTATTTCTGGGTTCTCTATTCTACTCCATTTGTTTCTCTATCTACCCTTAGGTCAGTA  
TCACACTGGGTTTTTTCTTT

In100 candidate1085 (in intron):

LOCUS ENSG00000144677

DESCRIPTION CTD small phosphatase-like protein (CTDSP-like) (Small C-terminl  
domain phosphatase 3) (Small CTD phosphatase 3) (SCP3) (Nuclear LIM  
interctorinteracting

factor 1) (NLI-interacting factor 1) (NIF-like protein) (RSP3) (YA22  
protein) (HYA22). [Source:Uniprot/SWISSPROT;Acc:O15194]

AGTATTTTGATTGATATACCCTCTATAACATTTTAATATCTTTATCTCAATTATTCTTTCCTAATGTTGCAGTTAACTGT  
ATTTTTTCATTTTGCTACGT

In100 candidate1086 (in intron):

LOCUS ENSG00000187950

DESCRIPTION Ovochymase-1 precursor (EC 3.4.21.-).

[Source:Uniprot/SWISSPROTAcc:Q7RTY7]



AGCTCTGTGTGATTGGGCCTCCCCACTTAACCTCTTCCACATAATTTCCCTCTATTTTTCTTGTGGTTAACCTTCAGATA  
CCGTGGCCTTTCTTCTTTCT

In100 candidate1087 (in intron):

LOCUS ENSG00000185787

DESCRIPTION Mortality factor 4-like protein 1 (MORF-related gene 15 protein  
(Transcription factor-like protein MRG15) (MSL3-1 protein).

[Source:Unipro/SWISSPROT;Acc:Q9UBU8]

AGTATTCTTAAGTATTTGTAATAATAAAAACAAAATTATAACTTTTATTAAGAGGTCATTTTATTTCTACCAGAATTA  
CTGATCTGATTTTTCTACTT

In100 candidate1088 (in intron):

LOCUS ENSG00000105784

DESCRIPTION Rap2-binding protein 9 [Source:RefSeq\_peptide;Acc:NP\_612147]

GTGCCACCCCTTCTCTGCTTAACCTAACTCTAGTTTTCTAGTTTTTCTGTCTCTGTTTTCTCTCCTCCAAAACAGGGCTT  
TTTAAATACTCTTTGGTTTT

In100 candidate1089 (in intron):

LOCUS ENSG00000105784

DESCRIPTION Rap2-binding protein 9 [Source:RefSeq\_peptide;Acc:NP\_612147]

TCTATTAATTTTTTTAACCTTTCAAAAACCAACTTTTCATTTAACTGATCCTTTGGGTTGATTTTTTTTTGTCTCAGTT  
TCATTCAGTTCTGCTCTGAT

In100 candidate1090 (in intron):

LOCUS ENSG00000167346

DESCRIPTION Matrix metalloproteinase-26 precursor (EC 3.4.24.-) (MMP-26)  
(Mtrilysin-2) (Endometase). [Source:Uniprot/SWISSPROT;Acc:Q9NRE1]

CATCTGATTTTCATTTTTTCCTGTAAAATATTAGTAAACGCTGGTCAATTAAGTGAATCTTCTATTTCTTGCTCTCAGAT  
CTATGTTCTGACCTTCAGTT

In100 candidate1091 (in intron):

LOCUS ENSG00000167346

DESCRIPTION Matrix metalloproteinase-26 precursor (EC 3.4.24.-) (MMP-26)  
(Mtrilysin-2) (Endometase). [Source:Uniprot/SWISSPROT;Acc:Q9NRE1]

CTGTAAACATTTGCCCTTTCCTCGTTTTCTGTTCTCTCCTTTTTCTTTGTCCTATTTACACACTTTCAGCATTCCTATG  
CATAGTTAATTTTATCTTTT

In100 candidate1092 (in intron):

LOCUS ENSG00000133107

DESCRIPTION Short transient receptor potential channel 4 (TrpC4) (Trp-relatd  
protein 4) (hTrp-4) (hTrp4). [Source:Uniprot/SWISSPROT;Acc:Q9UBN4]

GTGGGAACATTCATAACATTGTTGCAATATTTCCCCTTCTAGGCCTTTATATCAGGCATCTCTTGACGTTGGCCCTATTC  
CTTTGTTTCATCTATTGCAAT

In100 candidate1093 (in intron):

LOCUS ENSG00000133107

DESCRIPTION Short transient receptor potential channel 4 (TrpC4) (Trp-relatd  
protein 4) (hTrp-4) (hTrp4). [Source:Uniprot/SWISSPROT;Acc:Q9UBN4]

GGTGTGAGCTGCCAATACTAACTTTTTAGTTATCTACATACTCACTTTTGCTGTGATCTTTATTTTCTCATACAGCTTTG  
TGCTACTGTCTAATGTCCTT

In100 candidate1094 (in intron):

LOCUS ENSG00000133107

DESCRIPTION Short transient receptor potential channel 4 (TrpC4) (Trp-related  
protein 4) (hTrp-4) (hTrp4). [Source:Uniprot/SWISSPROT;Acc:Q9UBN4]

TAACTTTAAACAAAGTATTTAACCTTCCTCAGTCTCTAGTTCCTTACCTGTGAAATAGACATTTTATTCTTACCTTTTAC  
ATATCTCCATATACTCCTTC

In100 candidate1095 (in intron):

LOCUS ENSG00000182674

DESCRIPTION Potassium voltage-gated channel subfamily B member 2 (Voltage-gated  
potassium channel subunit Kv2.2). [Source:Uniprot/SWISSPROT;Acc:Q92953]EXON

TATCTGTCTTTTCATAAAATTGTATCTAGATATACTTCCCTGTATCTAACCTATGACTTTTTTTTTTGCTCTGTGACAGTT  
CTCCTTTAAATTTTTCATTT

In100 candidate1096 (in intron):

LOCUS ENSG00000182674

DESCRIPTION Potassium voltage-gated channel subfamily B member 2 (Voltage-gated  
potassium channel subunit Kv2.2). [Source:Uniprot/SWISSPROT;Acc:Q92953]EXON

TTATATTCATTAGTGAGAATAGTCTGTAACCTTTATTGTACTTTCTTGTTCACTTTTAGCTACTAGCCAGATGAGTTAGGT  
AGCTTTCTCTTTTCTATCC

In100 candidate1097 (in intron):

LOCUS ENSG00000008277

DESCRIPTION ADAM 22 precursor (A disintegrin and metalloproteinase domain 2)

(Metalloproteinase-like, disintegrin-like, and cysteine-rich protein 2)  
(etalloproteinase-disintegrin ADAM22-3). [Source:Uniprot/SWISSPROT;Acc:Q9P0K]  
CCCTGTCTTTTCCAACAAAATAAATTCAAGCTATTTAACCTTTTGTGTGACTTTATTCACCAGACTTTGTCATTCGCT  
GCCTGGAGCTGCATTTTCTT

In100 candidate1098 (in intron):

LOCUS ENSG00000008277

DESCRIPTION ADAM 22 precursor (A disintegrin and metalloproteinase domain 2)  
(Metalloproteinase-like, disintegrin-like, and cysteine-rich protein 2)  
(etalloproteinase-disintegrin ADAM22-3). [Source:Uniprot/SWISSPROT;Acc:Q9P0K]  
GGTGAAACCTGTCGTTTGCATATCCTTAACATTAGGGACTTAACTGCTTTTATTTTCTCTTCTTTTTTAGCAGGTACT  
TTGCTCTTAGAGTATTTCTT

In100 candidate1099 (in intron):

LOCUS ENSG00000008277

DESCRIPTION ADAM 22 precursor (A disintegrin and metalloproteinase domain 2)  
(Metalloproteinase-like, disintegrin-like, and cysteine-rich protein 2)  
(etalloproteinase-disintegrin ADAM22-3). [Source:Uniprot/SWISSPROT;Acc:Q9P0K]  
AGTGTTTTTGACTGCTAACTTTTCCTTTTGATTCTTTCTTAGAATTTTCTCTCTCTGCTTACATTATTCATCAGCTCTT  
GGATGTTGTCTACTTTTCC

In100 candidate1100 (in intron):

LOCUS ENSG00000008277

DESCRIPTION ADAM 22 precursor (A disintegrin and metalloproteinase domain 2)  
(Metalloproteinase-like, disintegrin-like, and cysteine-rich protein 2)  
(etalloproteinase-disintegrin ADAM22-3). [Source:Uniprot/SWISSPROT;Acc:Q9P0K]  
TATGGCCCCTATATTTTATGGTGTTACCATCTTTTAATAAGATTAACTCCTTCCTCATCACTTTTATTCCTATCCAGTG  
GTTTTCTACTGTCTTTCTTT

In100 candidate1101 (in intron):

LOCUS ENSG00000008277

DESCRIPTION ADAM 22 precursor (A disintegrin and metalloproteinase domain 2)  
(Metalloproteinase-like, disintegrin-like, and cysteine-rich protein 2)  
(etalloproteinase-disintegrin ADAM22-3). [Source:Uniprot/SWISSPROT;Acc:Q9P0K]  
TTTTTTTCTTTCAATTACTGAGGGAGGATTGTTGAAATCCTTAACTATAACTTTGAATTTGTCTATTTCTCCTTTCAGGT  
CTGTCACTTTTTACTTTCATG

In100 candidate1102 (in intron):

LOCUS ENSG00000008277

DESCRIPTION ADAM 22 precursor (A disintegrin and metalloproteinase domain 2)  
(Metalloproteinase-like, disintegrin-like, and cysteine-rich protein 2)  
(etalloproteinase-disintegrin ADAM22-3). [Source:Uniprot/SWISSPROT;Acc:Q9P0K]  
ACATGCACCATAAAGGCATGCTCTGCTAATTAACAAAATAAAATGTCCTCATATATTGTATTGTTTTTCCAGTCAAACT  
TTTGCATCTTCCTCATTGTT

In100 candidate1103 (in intron):

LOCUS ENSG00000189292

DESCRIPTION RGPG542. [Source:Uniprot/SPTREMBL;Acc:Q6UX46]

TCTGTTTGCTTATTTATAACGATTTCAATCTATTTCTTAACTTCTCATGTTGCTTATGTATTTCTGATTTTCATTCAGTT  
GTCTATCTGTGTCCCCTTGT

In100 candidate1104 (in intron):

LOCUS ENSG00000189292

DESCRIPTION RGPG542. [Source:Uniprot/SPTREMBL;Acc:Q6UX46]

ATAGAATTACATTTTTTAAACATGTTCAAGATTATTTTTTAACCTTTTATACTCCTTTCTGGTTTTCACTGTTTCAGAGGCTA  
TTTTAAAGCTCTTCCTCCTT

In100 candidate1105 (in intron):

LOCUS ENSG00000138760

DESCRIPTION Lysosome membrane protein 2 (Lysosome membrane protein II) (LIM  
II) (Scavenger receptor class B member 2) (85 kDa lysosomal membrane  
sialolycoprotein) (LGP85) (CD36 antigen-like 2).

[Source:Uniprot/SWISSPROT;Acc:Q4108]

TCTGTAGAGGGCTGTGGTCCTGATTACTATAGATGTAACCAAGAAAGAAATTATACTTTCCACATACCATTTTTGCAGTG  
TTTCATTTATTTATTCATTT

In100 candidate1106 (in intron):

LOCUS ENSG00000172554

DESCRIPTION Gamma-2-syntrophin (G2SYN) (Syntrophin 5) (SYN5).

[Source:Uniprt/SWISSPROT;Acc:Q9NY99]

AAAATTTTCATAAATATTTTATAACCTCTTACACATTTTCCATTCTCTTTCTTTTCTCAACTTTGTATATCCTTCAGTT  
TATCTTTTCTTTCTTCTTT

In100 candidate1107 (in intron):

LOCUS ENSG00000138771

DESCRIPTION shroom family member 3 protein

[Source:RefSeq\_peptide;Acc:NP\_06910]

TAGTAATCCTTTTTTCCAAAAGGTGATCATACTGTTTTGTAAACATGCTTTTTCTTTTCTTTTTTTTTTTTTTTGGCAGAG  
TTTTTGCTCTTGTTGCCAG

In100 candidate1108 (in intron):

LOCUS ENSG00000182348

DESCRIPTION zinc finger 804B [Source:RefSeq\_peptide;Acc:NP\_857597]

TTGTTGTAAGGGCTACATGAAAGTATTCTGCTACTTTAACTTACTCTGCTTACAAATCTCCTCAATTTTTTTTTTCCAGGT  
CAACTTACCATTTTTCTTTT

In100 candidate1109 (in intron):

LOCUS ENSG00000182348

DESCRIPTION zinc finger 804B [Source:RefSeq\_peptide;Acc:NP\_857597]

ATCCAATTCTGCTAATTAAGTAATTATTGAAGACAAAATAACTCATAGAGAAGCCCTATATATCCATATTTTTCCAGTC  
TCTCCTCATTTAATATTCTT

In100 candidate1110 (in intron):

LOCUS ENSG00000182348

DESCRIPTION zinc finger 804B [Source:RefSeq\_peptide;Acc:NP\_857597]

AATAATTATTTAATGTAAGTATATTCATTCTGTGTAAGTGGATGCTAACTTTGACTCTTTCCTCTTTGTTTGTGCCAGAC  
TTCTGAATAGCCCTTTTTTC

In100 candidate1111 (in intron):

LOCUS ENSG00000182348

DESCRIPTION zinc finger 804B [Source:RefSeq\_peptide;Acc:NP\_857597]

GAATGTCTTTGTATCTGAGTGATTTAATTCTTTCATCATATGCTAACTCTTCTTCATTAATTTTTTTTATTCAGCTGCCT  
CTTGCCTAATGCTTTCAGTT

In100 candidate1112 (in intron):

LOCUS ENSG00000182348

DESCRIPTION zinc finger 804B [Source:RefSeq\_peptide;Acc:NP\_857597]

ATGGTTTATTGAATTTGTTTATCTTTCAAAAAGCTAACTTTTGTTCATTGATCTTTTCTATTTTGTTAGTCTCAGTT  
TTGTTTAGTTCTTTTCTGAG

In100 candidate1113 (in intron):

LOCUS ENSG00000183323

DESCRIPTION coiled-coil domain containing 125

[Source:RefSeq\_peptide;Acc:NP789786]

ACCATGTCCAACTGATGTAACTTTTTACATATTTTATTTATTTATTTGTTTATTTATTTATTTATTTTACACAGGGT  
CTTGCTCTGTTGCCAGTTT



In100 candidate1114 (in intron):

LOCUS ENSG00000086666

DESCRIPTION AN1-type zinc finger protein 6 (Zinc finger A20 domain-containing protein 3) (Associated with PRK1 protein). [Source:Uniprot/SWISSPROT;Acc:6FIF0]  
AAATTGATGCGAGAGCAAAGGTTTATTTGGTTTCCATAACTATTTACTAATTTTATGCTTGCCAGATTTTAAGATTAAAC  
TGTTTGCCATCTCTTTTTTTT

In100 candidate1115 (in intron):

LOCUS ENSG00000040341

DESCRIPTION Double-stranded RNA-binding protein Staufn homolog 2.  
[Source:niprot/SWISSPROT;Acc:Q9NUL3]  
GTTGCCTTTCACCTTTCTCTAGTGCCTCCTTGAGCTGCTTAATAACCGACCTACTGAATTCTTTTTCTGGTAATTCAGAT  
ATTTCTTCCTGGTTTGGATC

In100 candidate1116 (in intron):

LOCUS ENSG00000188321

DESCRIPTION Zinc finger protein 559. [Source:Uniprot/SWISSPROT;Acc:Q9BR84]  
EXON  
TATATAGGCTTTCTACTCATTTCTCTCTCTGCTCCCTCTGTAACCTCTTTAATGTTTCTGTTCACTTGGCAGAGTTCCAC  
AGGTTCTTTAGGCTTTCTTC

In100 candidate1117 (in intron):

LOCUS ENSG00000172939

DESCRIPTION Serine/threonine-protein kinase OSR1 (EC 2.7.11.1) (Oxidative stress- responsive 1 protein). [Source:Uniprot/SWISSPROT;Acc:095747]  
TCCTGATTCCTAACTTAGGGCTCTGTTTCCTTCTGAATCTTATCTGTCTGTTTCACATATATATTCCTCAGCTTCTTAG

CACTGAGTTCTTTAATTTT

In100 candidate1118 (in intron):

LOCUS ENSG00000136379

DESCRIPTION

TTGTTGACTTTCTGCAAAGAAGTGAGAATTTTCTTGGTTAACCAATTTGCGGACTTCCTTTACTATTTCCAGTGTTT  
TATAGTTATTTTGGTTCTT

In100 candidate1119 (in intron):

LOCUS ENSG00000198028

DESCRIPTION Zinc finger protein 560. [Source:Uniprot/SWISSPROT;Acc:Q96MR9]

EXON

TGTTTACTTGTGATTTTCTTTTTCATATAGGCATTTATTGCTATTAAGTGCCTCTTTAAATCCTTGCTTGTTTCAGGT  
GTGTGTTACTTCATTTCCAC

In100 candidate1120 (in intron):

LOCUS ENSG00000198028

DESCRIPTION Zinc finger protein 560. [Source:Uniprot/SWISSPROT;Acc:Q96MR9]

EXON

CTGGAAGTTGGATGTTTTGGGATATCTTAAGTTTTCATCCTCCATTGCTTTGCATCTATCCAGACTTCCCTATTACCTAAC  
AAATGACCTTCTTTATGTTT

In100 candidate1121 (in intron):

LOCUS ENSG00000138759

DESCRIPTION Extracellular matrix protein FRAS1 precursor.

[Source:Uniprot/SISSPROT;Acc:Q86XX4]

GGTGAAAAATTTGAGTCTCTTGAAACACTCGTTCTCAATTGAGGTCTAACAAAGTGACATTGTTTCTTCTTGTTTCAGCT  
CTTCTCTCTCTCTCTATTTT

In100 candidate1122 (in intron):

LOCUS ENSG00000138759

DESCRIPTION Extracellular matrix protein FRAS1 precursor.

[Source:Uniprot/SISSPROT;Acc:Q86XX4]

CTTTTGACTTATATTTCCCATATCCCCCTCCTCGTCGCTCCTGGTAACCACTGTTCTCTTTGTTTCTGTGTATCCAGCT  
TTTGGAGTTTTTTGTTCCCA

In100 candidate1123 (in intron):

LOCUS ENSG00000150893

DESCRIPTION FRAS1-related extracellular matrix protein 2 precursor (ECM3  
hoolog). [Source:Uniprot/SWISSPROT;Acc:Q5SZK8]

TAGGAATACTGATCTGTATAACATATTCTAATTTCTCTTACGTAGAATATCATGTTCCCTCCCTTTTCTTTAATCAGAT  
TCTCATTACACATCTTTTAA

In100 candidate1124 (in intron):

LOCUS ENSG00000150893

DESCRIPTION FRAS1-related extracellular matrix protein 2 precursor (ECM3  
hoolog). [Source:Uniprot/SWISSPROT;Acc:Q5SZK8]

TGATAAGTATATTATTCTAGAGTAAAAATAACATTTACTTGGTTTAACTACACTTACTTTTATCCTACTGACTTTCAGTC

ATTTTACTGTATCTGTTCA

In100 candidate1125 (in intron):

LOCUS ENSG00000150893

DESCRIPTION FRAS1-related extracellular matrix protein 2 precursor (ECM3  
hoolog). [Source:Uniprot/SWISSPROT;Acc:Q5SZK8]

AAAAATAAAGATTCAATCCCTAGAAGAAAAATAAAGGCTCATATTAACAAATCTACCTCTTTTCTTTATAGATCAGGTA  
TCTCTACTTCCTTCATGTCT

In100 candidate1126 (in intron):

LOCUS ENSG00000127914

DESCRIPTION A-kinase anchor protein 9 (Protein kinase A-anchoring protein 9  
(PRKA9) (A-kinase anchor protein 450 kDa) (AKAP 450) (A-kinase anchor protin 350  
kDa) (AKAP 350) (hgAKAP 350) (AKAP 120-like protein) (Protein hyperin) (Protein  
yotiao) (Centrosome- and Go [Source:Uniprot/SWISSPROT;Acc:Q9999]

AATTTTAACTTGAGCCTATCATTTATTTATCATTTAAGTACTTTTTTTTTTAAACCATTGTTGCCTTTCTTTCAGTTAAT  
CTATCTTGTATATTCTGCTC

In100 candidate1127 (in intron):

LOCUS ENSG00000170456

DESCRIPTION CDNA FLJ43333 fis, clone NT2RI3006376.

[Source:Uniprot/SPTREMBLAcc:Q6ZUT9]

GCCTTATCTCTGAACTTACTATATATAACATTGATATAACCTTTTCTATTGTTTTTGACGCCTATTTTATTCAGTTAGCA  
TTATTTCCCTTGGCATCCTT

In100 candidate1128 (in exon):

LOCUS ENSG00000139160

DESCRIPTION

TATTTTAAATTTATGATCTGGTAATTCTAAAATGTCTGCCATAACTGAGTCTGGTTCTGATGCTTGTTTTCTTTTCAGAC  
TGTTTTTTTGTCTTTTAGCA

In100 candidate1129 (in intron):

LOCUS ENSG00000174718

DESCRIPTION CDNA FLJ10652 fis, clone NT2RP2005886.

[Source:Uniprot/SPTREMBLAcc:Q9NVL6]

GTTTTCAAGGCTCATTTATGTTAACACATGTATGTTACTTCATTCGTTTTTATTACCAGATATTCGGTTGTATGGATATG  
CCACTTTTGCTTATTCTTCC

In100 candidate1130 (in intron):

LOCUS ENSG00000185313

DESCRIPTION Sodium channel protein type 10 subunit alpha (Sodium channel  
prtein type X subunit alpha) (Voltage-gated sodium channel subunit alpha Nav18)  
(Peripheral nerve sodium channel 3) (hPN3). [Source:Uniprot/SWISSPROT;Ac:Q9Y5Y9]  
TATTTCTCTAACTCTTCTTCTGCCCTCTTTATTGTCTCTTTTTCTTTTCTTTTCTTTTCTTTTTTTTTTTTTTTTTCAGTT  
GTTTGGTTGCTTTGGTTTCT

In100 candidate1131 (in intron):

LOCUS ENSG00000140598

DESCRIPTION elongation factor Tu GTP binding domain containing 1 isoform 2

Source:RefSeq\_peptide;Acc:NP\_001035700]

GACTAGAATGCAAGGCTTGGGTGTAGCCTAACAAATCTCTGGCTCCGTTTTTTAAAATGTATTTTCCTTTTACAGGAAC  
TTGTTCTCCAATTTCCTTT

In100 candidate1132 (in intron):

LOCUS ENSG00000140598

DESCRIPTION elongation factor Tu GTP binding domain containing 1 isoform 2

Source:RefSeq\_peptide;Acc:NP\_001035700]

AGACCATCACATTCCATACTATGGAAATCATCAACTTGAAATAACTTTCACATTATTTTCCTAACCTACATTTTGCAGCA  
CTTCTCTCTGGTTTTCTCA

In100 candidate1133 (in intron):

LOCUS ENSG00000151746

DESCRIPTION Protein bicaudal D homolog 1 (Bic-D 1).

[Source:Uniprot/SWISSPRT;Acc:Q96G01]

AGTTCTAACATGTTTAGCTAGGTTCTTCCTATTTTTTGTGCTTCATCAGATCATTTGGGCTCAGTGTTTTCTTTCTTTT  
ATTTTTTTCTTTTTTTTTTGA

In100 candidate1134 (in intron):

LOCUS ENSG00000183722

DESCRIPTION Lipoma HMGIC fusion partner precursor.

[Source:Uniprot/SWISSPRO;Acc:Q9Y693]

CCTGTTTTTCCCGTAACCTCTTTTCTTAGCCTGTACTTTTCTACTATTTTGCTTTGTTTTGTTTTGTTTTTTGGTCAGCT  
GTTCTTTCTCCTGGTTGGCA

In100 candidate1135 (in intron):

LOCUS ENSG00000183722

DESCRIPTION Lipoma HMGIC fusion partner precursor.

[Source:Uniprot/SWISSPRO;Acc:Q9Y693]

CACATTTCCCTAATAACTAGTGATGTTGAACTTCTTTTCATGTACTTATTGCCCATTTGTATACCTTCTTTTGTGCAGTG  
TCTGTTCAAATCTTTTGCTC

In100 candidate1136 (in intron):

LOCUS ENSG00000183722

DESCRIPTION Lipoma HMGIC fusion partner precursor.

[Source:Uniprot/SWISSPRO;Acc:Q9Y693]

AGCTTTATTCAATAACCTATTCATACCTACCTGGTGTTTCTCATTTTTTCACAGTTTTTCATTTATTTAAGCTTTCTTACAA  
CTTTATTCCTTTATTGTGTG

In100 candidate1137 (in intron):

LOCUS ENSG00000183722

DESCRIPTION Lipoma HMGIC fusion partner precursor.

[Source:Uniprot/SWISSPRO;Acc:Q9Y693]

ATTGCATAATACAAGTATGTTAAATTGGATTAAAATGAATAACAAATGCTATTTTTCTTCGTTAAATATTCCAGATTTC  
TTTGATTAGATATCATCTCT

In100 candidate1138 (in intron):

LOCUS ENSG00000188659

DESCRIPTION

TTTACTAACTGGCCACCTCTGCCTAGTTATCATTTCTGTTTCTTTACAGGTCTATTTTGAATGTAAC TTCAGCTTTCCAT  
AGCTCTTAGCTTTACCTCCT

In100 candidate1139 (in intron):

LOCUS ENSG00000164683

DESCRIPTION Hairy/enhancer-of-split related with YRPW motif 1 (Hairy and  
enancer of split-related protein 1) (HESR-1) (Cardiovascular helix-  
loophelixfactor

2) (HES-related repressor protein 2) (HERP2).

[Source:Uniprot/SWISSPOT;Acc:Q9Y5J3]

TTTTATTTTGTATTGATTAACGAAATAACCACCTTTTTTTTGTCTTTGAAATTTACAGTCGTAATGGTAATGCCTT  
CCTTTGTTTTGCTTGCCCTC

In100 candidate1140 (in intron):

LOCUS ENSG00000147586

DESCRIPTION Mitochondrial 28S ribosomal protein S28 (S28mt) (MRP-S28) (MRP-  
35). [Source:Uniprot/SWISSPROT;Acc:Q9Y2Q9]

TTTTCTTAGTCTGGCTAGAAAGCTTACCTCAAATAACCAACTTTTGCTTTCGTTGATTCTATTGATTTTCCTGTTTTCAGTT  
TCATTGCTTTCTGTGCTAAT



In100 candidate1141 (in intron):

LOCUS ENSG00000001631

DESCRIPTION Krev interaction trapped protein 1 (Krev interaction trapped 1)(Cerebral cavernous malformations 1 protein).

[Source:Uniprot/SWISSPROT;AccO00522]

CACACTCTGCTTTCTCTTTTTCACCTCTTCATAAACCTTAACCTTTTCTGAGTTTTTGATCTGTTTCCCTGCTCTGCAGCA  
TTTAATTCTTGACTACTTTT

In100 candidate1142 (in intron):

LOCUS ENSG00000205574

DESCRIPTION

AGTTGTATAAACATTGAGAATTATAATGCATTGCTAATGAGCTTAACCTTTTATCATTCATCTCTGATATTTTCAGCTTA  
TTTTGAATCCTACTTTCTCT

In100 candidate1143 (in intron):

LOCUS ENSG00000076554

DESCRIPTION Tumor protein D52 (N8 protein).

[Source:Uniprot/SWISSPROT;Acc:P5327]

TTAACCATTTGAAGCTATCTACTTTTACACTTTTCTTTGGGAGATTTTGTACTTGTTCAATCTCTTTACTTGTTTCAGAT  
TTCTTCTATTTTGTGGGTC

In100 candidate1144 (in intron):

LOCUS ENSG00000130812

DESCRIPTION Angiopoietin-related protein 6 precursor (Angiopoietin-like 6)  
Angiopoietin-related growth factor) (Angiopoietin-related protein 5).

[Source:Uniprot/SWISSPROT;Acc:Q8NI99]

GAGCCACCGCGCCTGGCCCTACTGTTATTTTTAGCATTTAACATTGTCTAATATGCTCTATTTATTCATCCTATACAGTA  
CATATTTATTTTTTTTGCCCA

In100 candidate1145 (in intron):

LOCUS ENSG00000001629

DESCRIPTION Ankyrin repeat and IBR domain-containing protein 1 (Fragment).

Source:Uniprot/SWISSPROT;Acc:Q9P2G1]

AGCCAAATAACTTCATTGTGCATTTCTTTTCTTTTGAAGCCACTAACTTTCTCCTGTTACAGTTTTTCATGTCATCCCTT  
GAACTGTCCTCTGCTAATTT

In100 candidate1146 (in intron):

LOCUS ENSG00000179978

DESCRIPTION Baculoviral IAP repeat-containing 1 variant (Fragment).

[SourceUniprot/SPTREMBL;Acc:Q59GI6]

TTTTAAAGATGTTACACTTTGCTGTGAGAGATGTAGCTGACATAACTAAATTTTTATTTTCCCTTTCATAGTTGCCAGTT  
TGCCAAATTTTATTTCTCTG

In100 candidate1147 (in intron):

LOCUS ENSG00000197826

DESCRIPTION Uncharacterized protein C4orf22.

[Source:Uniprot/SPTREMBL;Acc:QV702]

TCATTACCACTGTCCTTGAGCTAAAATGTTCTCTTAACCATCAAGTCTATAATTCTTCTTCCAGAGTATCTGTAGGGTT  
TACCATTTCTTTCTATTTT

In100 candidate1148 (in intron):

LOCUS ENSG00000205570

DESCRIPTION Beta-glucuronidase-like protein SMA3.

[Source:Uniprot/SWISSPROTAcc:Q15486]

AGTTGTATAAACATTGAGAATTATAATGCATTGCTAATGAGCTTAACCTTTTATCATTCCATCTCTGATATTTTCAGCTTA  
TTTTGAATCCTACTTTCTCT

In100 candidate1149 (in intron):

LOCUS ENSG00000138669

DESCRIPTION cGMP-dependent protein kinase 2 (EC 2.7.11.12) (CGK 2) (cGKII)

Type II cGMP-dependent protein kinase). [Source:Uniprot/SWISSPROT;Acc:Q1323]

AGGCGTGAGGCACTGCACTCTGCCTGATTTAAGCTAACTCTTAAATATGATTCCTTCATATATTGTTTCAGCTCAATTAT  
TTCTCTTTCTTCAGGGTCCC

In100 candidate1150 (in intron):

LOCUS ENSG00000080603

DESCRIPTION Snf2-related CBP activator protein

[Source:RefSeq\_peptide;Acc:N\_006653]

TCTTATACATAGTAAGTGCTCAAGAAATGTAACCTGTAATTTCTGTGTTTCTCTTTATTCAGTGTTATTTCTGGTTTTTT  
AAAAATACTTTTTTCATCCCC

In100 candidate1151 (in intron):

LOCUS ENSG00000139117

DESCRIPTION Copine-8 (Copine VIII). [Source:Uniprot/SWISSPROT;Acc:Q86YQ8]

GATTTTCCAATCCATTAACATGGAGGTTTTTCCATTTTTTTGTCTTCTTATTTATTTTCATTCATGCTTTGTGTTTCAGTG  
TCTTTTACCTTCTTAGTTAA

In100 candidate1152 (in intron):

LOCUS ENSG00000139117

DESCRIPTION Copine-8 (Copine VIII). [Source:Uniprot/SWISSPROT;Acc:Q86YQ8]

CATGTCAACTGTGGTTTTTCCCATTTGGTTAAGGGCTCCCTTAACAATGTCGAAGTCTAATTTTCATGCCTTTCCAGTCACT  
TTTGTTTCTTAGAACCATCT

In100 candidate1153 (in intron):

LOCUS ENSG00000139117

DESCRIPTION Copine-8 (Copine VIII). [Source:Uniprot/SWISSPROT;Acc:Q86YQ8]

GTCCTATTCCTTCTAACAAAAAATGCTTCTCTTTCTGCCTTCTTCTTCCCTTCTTGCTGTTATTGCCTTAGTTCAGAT  
TCTCATTACTTTTCTACCGA

In100 candidate1154 (in intron):

LOCUS ENSG00000139116

DESCRIPTION Kinesin family member 21A (Kinesin-like protein KIF2) (Renal  
cacinoma antigen NY-REN-62). [Source:Uniprot/SWISSPROT;Acc:Q7Z4S6]

TCTGGCACATAGTAATCCTGAAATGTTAGTTGGGACTAACTTGCAAAAATCTATTTCTTTAACAGAGATTCTTTCTAGTC  
TTCACTTGGGCCCCCTTTT

In100 candidate1155 (in intron):

LOCUS ENSG00000139116

DESCRIPTION Kinesin family member 21A (Kinesin-like protein KIF2) (Renal  
cacinoma antigen NY-REN-62). [Source:Uniprot/SWISSPROT;Acc:Q7Z4S6]

TGGTTATTAAC TTTGCCAATATCACTGACATTCTTGCTTTCTCATACCTTGCATCATTCTGATATGTTTTTTCAGCTTTT  
TTTTTTATGGTAATGTATTC

In100 candidate1156 (in intron):

LOCUS ENSG00000064726

DESCRIPTION BTB/POZ domain-containing protein 1 (Hepatitis C virus  
NS5Atrnsactivated  
protein 8) (HCV NS5A-transactivated protein 8).

[Source:UniprotSWISSPROT;Acc:Q9H0C5]

ATTCTTTTCAAGTGCTTAACGTCTTCTTTTCACAAATTCCTCTTTTCTCTATCCCTGTTAGATTGCAGTTTATCATTTT  
ATTCTAGTATATTAGCCTCT

In100 candidate1157 (in intron):

LOCUS ENSG00000081770

DESCRIPTION Baculoviral IAP repeat-containing protein 1 (Neuronal  
apoptosisinhibitory protein). [Source:Uniprot/SWISSPROT;Acc:Q13075]

TTTTAAAGATGTTACACTTTGCTGTGAGAGATGTAGCTGACATAACTAAATTTTTATTTTCCCTTTCATAGTTGCCAGTT  
TGCCAAATTTTATTTCTCTG

In100 candidate1158 (in intron):

LOCUS ENSG00000184672

DESCRIPTION RALY-like protein isoform 1 (RALY-like protein isoform 2).

[Source:Uniprot/SPTREMBL;Acc:Q86SE5]

ATAATGATTATTTGTGTTATTTTAACTCAATAAAACCCAAACAATATCTATCTTTTCTTTTCCTGTGTCTTTTCCAGAT  
TTTCTTCTTCCTTCTCTTTT

In100 candidate1159 (in intron):

LOCUS ENSG00000151692

DESCRIPTION Ubiquitin-conjugating enzyme 7-interacting protein 4 (UbcM4-  
ineracting protein 4) (RING finger protein 144).

[Source:Uniprot/SWISSPROT;Ac:P50876]

AACACTCTTGACTTTGTTGACCCTCTGTATTGTAACCTTACTTTGTGTTTTATTTATTTTTGTTTTGTTTGTACAGGT  
CTTCTTTTGCTCTCTTTGAT

In100 candidate1160 (in intron):

LOCUS ENSG00000173208

DESCRIPTION ATP-binding cassette sub-family D member 2  
(Adrenoleukodystrophrelated  
protein) (hALDR) (Adrenoleukodystrophy-like 1).

[Source:Uniprot/SISSPROT;Acc:Q9UBJ2]

AGGAACAATTTATCTTTTTCCTTTATTTAACTTTTTCCTTTATTTATCTTTTTCCTTTCAAATTCAGATGCCTTTTATTT  
CTTTTCTTGCCTAATTGCT

In100 candidate1161 (in intron):

LOCUS ENSG00000120688

DESCRIPTION WW domain-binding protein 4 (WBP-4) (Formin-binding protein 21)

[Source:Uniprot/SWISSPROT;Acc:O75554]

AACCCATAGTTTTAGATAAGTTTTAACACCTGGTAGAACTAAATTCTCCTTTTTCTTTTTATTACAGTTTTCCTTCCCT  
TACATGTTTATTTTTCCGAA

In100 candidate1162 (in intron):

LOCUS ENSG00000136404

DESCRIPTION Transmembrane 6 superfamily member 1.

[Source:Uniprot/SWISSPROTAcc:Q9BZW5]

AGGCAAGGCCGGCTTCCCTTCTCTGTGAATTAACCATCCCCACACTCCTCTCCATTTCTTTTTTCACAGCTTTTCTTATA  
TTCACCATCAGATTTTTCTT

In100 candidate1163 (in intron):

LOCUS ENSG00000133739

DESCRIPTION sodium channel associated protein 2 isoform a

[Source:RefSeq\_petide;Acc:NP\_208325]

GGTAACATAAATTTTTCACTCACTTTACTTGTCTTCCTTTACATCTTCATTATGTAATTTCTTTGTCTTGTTCTGCAGTA  
CTTTACATTACTTCTATTAC

In100 candidate1164 (in intron):

LOCUS ENSG00000180116

DESCRIPTION CDNA FLJ40126 fis, clone TESTI2011028.

[Source:Uniprot/SPTREMBLAcc:Q8N818]

TATTAATGGTTTGATTTTCTGGTGTGGTAACATTTGAGTCGTTTTCTTCCTTATTTGTATCTTTGCTCTACCAGTTAGT  
TTTATACTTTCATGCATTTT

In100 candidate1165 (in intron):

LOCUS ENSG00000180116

DESCRIPTION CDNA FLJ40126 fis, clone TESTI2011028.

[Source:Uniprot/SPTREMBLAcc:Q8N818]

TTTATATTTATCTATAGGAAAACATAAATTGTTTAACAAGTTGGACTTACTTGTCTTAATTCTTTTCAGTTTTTTAGGAT  
AATTGCTCTCTGTCATCTCT

In100 candidate1166 (in intron):

LOCUS ENSG00000180116

DESCRIPTION CDNA FLJ40126 fis, clone TESTI2011028.

[Source:Uniprot/SPTREMBLAcc:Q8N818]

TAGGAAATTAAATAAAGAATAACAAATTTCCAAATTGCCTTAATATGTTTGTCTTTCTTCAGCTGCATTTACTATGATTA  
CCTGAAGCTTTTCCTTTTTC

In100 candidate1167 (in intron):

LOCUS ENSG00000180116

DESCRIPTION CDNA FLJ40126 fis, clone TESTI2011028.

[Source:Uniprot/SPTREMBLAcc:Q8N818]

TTCATTTCTTGGCAAGTGTCTATTCTGTTGCTTGTTGTTTTTTAACGAATTTAAATTTTCATTTTATTGTTTACCACAGGC  
TAATTTTTTCTTTGTGGTTTA

In100 candidate1168 (in intron):



LOCUS ENSG00000004948

DESCRIPTION Calcitonin receptor precursor (CT-R).

[Source:Uniprot/SWISSPROT;Acc:P30988]

TTTGTGTTTCATAGAATTTCAGCTCACAAAAAGTCGCAAGAATAGTAACAAAAATCCTGTATGTTCTTTATCCAGAT  
TTACCAATCCATGTTCTTTA

In100 candidate1169 (in intron):

LOCUS ENSG00000145293

DESCRIPTION Enolase-phosphatase E1 (EC 3.1.3.77) (2,3-diketo-5-methylthio-1  
phosphopentane phosphatase) (MASA homolog). [Source:Uniprot/SWISSPROT;Acc:9UHY7]

GGTAAGATTGTGGAAGAACTGGATCTTTTACAAGCTGATAAAAGCTAACTCTTGTATTTTCTTTTACTCTTTTATCCAGGA  
CATTTTATTTTCTTACATCG

In100 candidate1170 (in intron):

LOCUS ENSG00000151229

DESCRIPTION Proton myo-inositol cotransporter (H(+)-myo-inositol  
cotransporter) (Hmit). [Source:Uniprot/SWISSPROT;Acc:Q96QE2]

AGATTTGGCCCATGAGCTATAGGTTGCTGATTCCTTCTTTAACCATTAAGTATGTCTGTTTTTATCAGTTTCCTCAGTTT  
TTATTCTTTGGACTAATTG

In100 candidate1171 (in intron):

LOCUS ENSG00000166503

DESCRIPTION Hepatoma-derived growth factor-related protein 3 (HRP-3)  
(Hepatoma-derived growth factor 2). [Source:Uniprot/SWISSPROT;Acc:Q9Y3E1]

TAGTACTTCGTTGGATATTAGTTTTGTAACCTGTTTTCATTTTGGCTTTTATTTCACTAATACATCTTTATCCAGAATTT  
TACTCAAACTTTTCTGTTT

In100 candidate1172 (in intron):

LOCUS ENSG00000166503

DESCRIPTION Hepatoma-derived growth factor-related protein 3 (HRP-3)

(Hepatoma-derived growth factor 2). [Source:Uniprot/SWISSPROT;Acc:Q9Y3E1]

TAGAACATCACAATTAAC TTGTATCTATTTACGTATTCTTTCCAGTCCCTCTTCCTACCCAGAGATGAGCACTAATGTTG  
TATTATTCCTTTTCTTTTT

In100 candidate1173 (in intron):

LOCUS ENSG00000145284

DESCRIPTION stearyl-CoA desaturase 4 isoform a

[Source:RefSeq\_peptide;Acc:P\_001032671]

GACAATATTGAGTCTTCCTATTTATGAGCATGGGATAACTCTTCATCTATTTAGTTCTTCTTTGATTTCTTTCATCAGTG  
TTTTATGATCTTCCTCATAC

In100 candidate1174 (in intron):

LOCUS ENSG00000140600

DESCRIPTION SH3-containing GRB2-like protein 3 (Endophilin-3) (Endophilin-A)

(SH3 domain protein 2C) (EEN-B2). [Source:Uniprot/SWISSPROT;Acc:Q99963]

TCGTCTACTATGATTCCTACCACACCACTGCTGGTTAACTTTTAACTCTCTGTTCACTATGTTTTATTTTCCAGCCTCT  
CTTCTCTGTCCAAC TTTT

In100 candidate1175 (in intron):

LOCUS ENSG00000140600

DESCRIPTION SH3-containing GRB2-like protein 3 (Endophilin-3) (Endophilin-A)  
(SH3 domain protein 2C) (EEN-B2). [Source:Uniprot/SWISSPROT;Acc:Q99963]

TTCATTGCCGTATCTTGGGAACACTATATCACCCATAGGCTTGTTAACACACTGTCACCTCTTCTGTCTTTGCAGAGAAG  
TTTATTCCTCATTATTCCTC

In100 candidate1176 (in exon):

LOCUS ENSG00000179859

DESCRIPTION

TGGGGGTATAAACCTCAATTTTTGTAAACCCTATTTTGGCATTTCCTGTCCTTACATCTCAGCTTAAATGCTCCCTCTTT  
TGGGAGGCCTTTTTCTGCCT

In100 candidate1177 (in intron):

LOCUS ENSG00000120662

DESCRIPTION Peptide chain release factor 1, mitochondrial precursor (MRF-1)  
[Source:Uniprot/SWISSPROT;Acc:O75570]

TAGTTCTTTTTCCTACCCTTTTTCTGATTGTAAAAAATTATTTTTTTAACTTTTGAGAGCTCTTTCTTGTTCTCAGAA  
TTGTTTTCTCATAGCATCCT

In100 candidate1178 (in intron):

LOCUS ENSG00000145734

DESCRIPTION transcription factor-like nuclear regulator  
[Source:RefSeq\_peptde;Acc:NP\_060899]

CCACATCTGTTGATTACTGAGAAAGGAGTGTTGAAGTCTCCATCTGTAAGTGTGGATTGCCTGTTTCTTTTTTTCAGTT  
CTATTTGTTTTTGCTCCATA

In100 candidate1179 (in intron):

LOCUS ENSG00000143797

DESCRIPTION Membrane-bound O-acyltransferase domain-containing protein 2 (E2.3.--) (O-acyltransferase domain-containing protein 2).

[Source:Uniprot/WISSPROT;Acc:Q6ZWT7]

TCTTATGAACCAAAATATGGGATGTAAAGAACTGTAACCCACATAGTCTTGTTGCCCTTGCTTTTAAGTGCTTTTCAGAA  
TTATTTGAATTACTTTTTTTT

In100 candidate1180 (in intron):

LOCUS ENSG00000156218

DESCRIPTION ADAMTS-like protein 3 precursor (ADAMTSL-3) (Punctin-2).

[Source:Uniprot/SWISSPROT;Acc:P82987]

CTTCATTTATTCAAGTATATTTTAGACCCCTTAGTAAAGTTTTGTAACCTTAATAATGAGCTTTATTTCTTTTCAGGTCTA  
TACCTACATCTATGTACTTT

In100 candidate1181 (in intron):

LOCUS ENSG00000156218

DESCRIPTION ADAMTS-like protein 3 precursor (ADAMTSL-3) (Punctin-2).

[Source:Uniprot/SWISSPROT;Acc:P82987]

GTAGGCATGCTTCATTATTTTTTATTCTTTTTTCTTTTGTCTCCTCTAACTGTATTTTAAAATACCCTGTTTTTCAGGCTC  
ACCAGTTCTTTCTTCTGGTT

In100 candidate1182 (in intron):

LOCUS ENSG00000065989

DESCRIPTION cAMP-specific 3',5'-cyclic phosphodiesterase 4A (EC 3.1.4.17)  
(PDE2) (PDE46). [Source:Uniprot/SWISSPROT;Acc:P27815]

CTACAAAATAAAATAAATTTTAAAAGAAATCCATGCTCTGCTACTAATAACCATAGTATTTATCCTTTATGTGCCTCAGTT  
TCTTTCTTTCTTCCTTCCTT

In100 candidate1183 (in intron):

LOCUS ENSG00000121236

DESCRIPTION Tripartite motif-containing protein 6 (RING finger protein  
89). [Source:Uniprot/SWISSPROT;Acc:Q9C030]

AGAAATTCCCAACTTATGTGGTTTCCTCCATTTCTACACTCTCATAACCCTGGATCCCAATCTACTTCTTTCAGGCTTTA  
CCTCGGCTTTTCTTTGTTTA

In100 candidate1184 (in intron):

LOCUS ENSG00000121236

DESCRIPTION Tripartite motif-containing protein 6 (RING finger protein  
89). [Source:Uniprot/SWISSPROT;Acc:Q9C030]

TTTTCATATAACTCACTTCTGATTTTTCCATTTTTTTTCTACTGTTCTTCTTTCTTTCATTAGTCTTACACCAGTCTTT  
ATACACTTTGACTCATGTTT

In100 candidate1185 (in intron):

LOCUS ENSG00000018236

DESCRIPTION Contactin-1 precursor (Neural cell surface protein F3)  
(Glycoprotein gp135). [Source:Uniprot/SWISSPROT;Acc:Q12860]

CTTAAAATTCACATTCTTTTTATTCTTCCATCTAACCTATAAACTTATTTTTCTGGTACTGTCAACTATGTTTCTCAGGC

CAGTCTATTACTTTCTATTT

In100 candidate1186 (in intron):

LOCUS ENSG00000189136

DESCRIPTION CDNA FLJ43276 fis, clone KIDNE2011532, moderately similar to Hoo sapiens melanoma-associated chondroitin sulfate proteoglycan 4.

[Source:Uiprot/SPTREMBL;Acc:Q6ZUW4]

ACAAC TAA AATTAATTGAAATTAACATTTCAATGTAAGTTGTTCTGGTCTTTTTCTGTGCTTATTT CAGCATAATTTAAATTCCTTTCTATTCCTTTGTGT

In100 candidate1187 (in intron):

LOCUS ENSG00000168038

DESCRIPTION

ATTCTAACATAATCATGCAAAC TTTGTTTTGATTAATATTTGCCTGCTATATGTTTTTTCATTCTTTTCCTTCAGACATCTACTTTTATGTTTTAGATCT

In100 candidate1188 (in intron):

LOCUS ENSG00000168038

DESCRIPTION

ATTCTTCTAACCCATGAGCATAGGATATTTTCTATTTATTTTGTCTCTTCAGTTTCTTATGTTTTGAAGTTTTCCTTTTAGAGGTATTTTACCTCCT

In100 candidate1189 (in intron):

LOCUS ENSG00000168038

DESCRIPTION

CATCAAGTTAACTAATGAACAAGGTATAGCTTTCCATTTATTTAAGTCCTTTTTACTTTCAGCAATATTTTGTATTTTTC  
ATGCACATGTCCTTCATCCT

In100 candidate1190 (in intron):

LOCUS ENSG00000168038

DESCRIPTION

TTATCTAAATGATAACCTTCCTTGCCTTATTTTTATTTCATTTCTACCTTATTTATATTCTTTAGGTTACCAGTCCTATTC  
TTTTTTTAGATGGAGCCTCTC

In100 candidate1191 (in intron):

LOCUS ENSG00000176371

DESCRIPTION Zinc finger and SCAN domain-containing protein 2 (Zinc finger  
potein 29 homolog) (Zfp-29). [Source:Uniprot/SWISSPROT;Acc:Q7Z7L9]

TCTTACTGTTAGCCACCCTGGGTAGTTTTTGTGGCCCATGGTGTAACCTTTCACATGTTCTTATATCCTTACAGGTTTT  
ATCTTTAAGTATTAGTTCTT

In100 candidate1192 (in intron):

LOCUS ENSG00000189308

DESCRIPTION lin-54 homolog [Source:RefSeq\_peptide;Acc:NP\_919258]

GTCCTGTTTTTAAGTGAATTAACATCAAGTTGCCTTTTTCTGATACCAGTTATCCTCAGGAATTGCGGATTTTCTGTATG  
AATTTTTTTTTTTTTTTTTTTT

In100 candidate1193 (in intron):

LOCUS ENSG00000138663

DESCRIPTION COP9 signalosome complex subunit 4 (Signalosome subunit 4) (SGN)  
(JAB1-containing signalosome subunit 4). [Source:Uniprot/SWISSPROT;Acc:Q9T78]  
TAACCTCTAGGCCTCTTACTCTGTCTTTTCCATTTCAATGCTTTATTCTGGATTAGTTCTTCAGGCCTACCTTCTAGTTT  
ATCACTTCTTCAACTGTGTT

In100 candidate1194 (in intron):

LOCUS ENSG00000138663

DESCRIPTION COP9 signalosome complex subunit 4 (Signalosome subunit 4) (SGN)  
(JAB1-containing signalosome subunit 4). [Source:Uniprot/SWISSPROT;Acc:Q9T78]  
TATTTGAAATATCTCACTCTGGCCATAACCTTTTTCTTGTTTCTCTAGTGGTCTGTGGTCTGTCTCCGTTACTCTCAGTT  
CAATTCTTCCTTGACCTTAT

In100 candidate1195 (in intron):

LOCUS ENSG00000182606

DESCRIPTION Trafficking kinesin-binding protein 1 (106 kDa O-GlcNAc  
transfease- interacting protein). [Source:Uniprot/SWISSPROT;Acc:Q9UPV9]  
CCTCTGCTGCTTCCTAAAATGGATTAAAAATAACTTCCTAATATATTCTCCCTTCCTTTATATATCAGTTGCCCTGTTCA  
CTTGGTTGCCCTTTTCATTT

In100 candidate1196 (in intron):



LOCUS ENSG00000165966

DESCRIPTION PDZ domain-containing RING finger protein 4 (Ligand of Numbproein  
X 4) (SEMACAP3-like protein). [Source:Uniprot/SWISSPROT;Acc:Q6ZMN7]

TAAGTATGTAAC TTGTTTCTTCACTATTCTTCTACTAACAATTTTCTTTCTCAGCCCCTCCATTTCTGTCTGCTAAAT  
ATATCCCATCTTATTATATT

In100 candidate1197 (in intron):

LOCUS ENSG00000165966

DESCRIPTION PDZ domain-containing RING finger protein 4 (Ligand of Numbproein  
X 4) (SEMACAP3-like protein). [Source:Uniprot/SWISSPROT;Acc:Q6ZMN7]

CCTTCTTTGCTTATAGATAGGTTAATATAATAACATCATTTATAGTCTCTTTGGTGTTCCAGCAGTTGTTAGTCTTTAAC  
ATAGCTTTTGTTCTTCCCCT

In100 candidate1198 (in intron):

LOCUS ENSG00000165966

DESCRIPTION PDZ domain-containing RING finger protein 4 (Ligand of Numbproein  
X 4) (SEMACAP3-like protein). [Source:Uniprot/SWISSPROT;Acc:Q6ZMN7]

GAATAAGTAAAACTGAACATGCTAGAGGAATTCTTAGAATGAGTAACTTCATAGATAATTTTGTTTTAATTTTACAGTT  
CATTTTTTGATTACTTTTCT

In100 candidate1199 (in intron):

LOCUS ENSG00000158528

DESCRIPTION Neurabin-1 (Neurabin-I) (Neural tissue-specific F-  
actinbindingprotein

I) (Protein phosphatase 1 regulatory subunit 9A).

[Source:Uniprot/SISSPROT;Acc:Q9ULJ8]

CTATTGCACAAGAAGAATAAGTTAGGATTTTATGGAAAGTAACTGTCTCTACTGTTTTGCCTGTTTACATATCTTCAGTA  
ATGTATACCTTTTTCCTCTC

In100 candidate1200 (in intron):

LOCUS ENSG00000158528

DESCRIPTION Neurabin-1 (Neurabin-I) (Neural tissue-specific F-  
actinbindingprotein

I) (Protein phosphatase 1 regulatory subunit 9A).

[Source:Uniprot/SISSPROT;Acc:Q9ULJ8]

CACTTTGTCCCAAATTATATTTTGTCTCATAATAAAAAATTAAGTCTGGCTTCTTTTGCTTTATATTTGTTTCACAGCA  
TCTATTTTTTCCATCTTATG

In100 candidate1201 (in intron):

LOCUS ENSG00000173085

DESCRIPTION Para-hydroxybenzoate--polyprenyltransferase, mitochondrial  
precursor (EC 2.5.1.-) (PHB:polyprenyltransferase) (hCOQ2).

[Source:Uniprot/SWISPROT;Acc:Q96H96]

AAGACCCTCTGATTCCTCTCTCCCTCCTCTAAAGTCTAACTAACTTAGATAGTTTTGTTTTATGCCTTTGCAGGAC  
CCTGTGCTTGTCTGTTGTT

In100 candidate1202 (in intron):

LOCUS ENSG00000134283

DESCRIPTION Periphilin-1 (Gastric cancer antigen Ga50).

[Source:Uniprot/SWISPROT;Acc:Q8NEY8]

CTAAGAATCTGATAGTTTGCAAGACATAGCCCCTAACTTTATCATCTCTTATGATTATGCTGTTTTTTTTTCCCTGCAGTG  
TCCTTTTTTTCCTACCTGGG

In100 candidate1203 (in intron):

LOCUS ENSG00000170289

DESCRIPTION Cyclic nucleotide-gated cation channel beta 3 (CNG channel beta3)  
(Cyclic nucleotide-gated channel beta 3) (Cone photoreceptor cGMP- gatedchannel  
subunit beta) (Cyclic nucleotide-gated cation channel modulatory suunit).

[Source:Uniprot/SWISSPROT;Acc:Q9NQW8]

AGGTGTTGTAACCTTCTAGATCTATTCTCCATATGCTTTTCTTACCTGATGTAACCTCAGTCCTGTCTTACTTTCCTTGTG  
TACTTTTACACCTGTTGTCC

In100 candidate1204 (in intron):

LOCUS ENSG00000136383

DESCRIPTION Alpha-protein kinase 3 (EC 2.7.11.-) (Muscle alpha-protein  
kinase). [Source:Uniprot/SWISSPROT;Acc:Q96L96]

CCACATACCTAGGTGTGATACCTTATTGTCTATCTTCTTCTAACCATGGTAACTGCCTTTTAAAATTTTTTTCTGCAGTC  
ATTTAAGTTCTCCTTTTACC

In100 candidate1205 (in intron):

LOCUS ENSG00000151694

DESCRIPTION ADAM 17 precursor (EC 3.4.24.86) (A disintegrin and  
metalloprotease domain 17) (TNF-alpha-converting enzyme) (TNF-alpha convertase)  
(Snak venom-like protease) (CD156b antigen).

[Source:Uniprot/SWISSPROT;Acc:P7853]

AGGCTGGTCTCAAACCCCTAACCTCGTGGTCCACCTGCCTCATCTTTTTTTTTTTTTTTTTTTTTTTTGGAGACAGAATTT

CTCTCTTGTTGCCTAGGCTG

In100 candidate1206 (in intron):

LOCUS ENSG00000102763

DESCRIPTION OTTHUMP00000018323. [Source:Uniprot/SPTREMBL;Acc:Q5JUE1]

TTGTTGTATCCTACCTCTCCATTCTTGTTGCCATAACCTTACTGTAGGACTTTTTCCTTTTATAGGCAGATTATTGAAGT  
AGCTTTCTGTTTCCTGTCTC

In100 candidate1207 (in intron):

LOCUS ENSG00000176571

DESCRIPTION cyclic nucleotide binding domain containing 1

[Source:RefSeq\_petide;Acc:NP\_775809]

TACCTTAGTGCAAAACACTATCATCTGTCACCTAGCTCACTGTAATAACCTCCTACTGATTCTCTGCTTCTACTCAGGC  
TTTCCTCAATCATTTATTTT

In100 candidate1208 (in intron):

LOCUS ENSG00000176571

DESCRIPTION cyclic nucleotide binding domain containing 1

[Source:RefSeq\_petide;Acc:NP\_775809]

TTTTTCTTAGCTTGCTTATGATTATTTTGAATTTTTTGTGGGTAACCTATACCGCCATTTCTTTAGTGTCAGTTTCT  
GAAGTTTTATTTATTTATTT

In100 candidate1209 (in intron):

LOCUS ENSG00000139174

DESCRIPTION Prickle-like protein 1 (REST/NRSF-interacting LIM domain protein 1). [Source:Uniprot/SWISSPROT;Acc:Q96MT3]

AGTGAATTTCTTCAAACCTTCTTGGTTTTAACCAAATGATATTGCTTCTTCTTTTCCTCATTTTAAAGTTCAGTCATTTACTCAACAGATTTTTTCTTTCT

In100 candidate1210 (in intron):

LOCUS ENSG00000156103

DESCRIPTION Matrix metalloproteinase-16 precursor (EC 3.4.24.-) (MMP-16) (Membrane-type matrix metalloproteinase 3) (MT-MMP 3) (MTMMP3) (Membrane-type matrix metalloproteinase) (MT3-MMP) (MT3MMP) (MMP- X2).

[Source:Uniprot/SWSSPROT;Acc:P51512]

AACATACAAAGATGATAACAAAAATGTCTGTGTTTCTGCAACCTATGATATTTTCCTTTTAATCTTTTACTCTGCAGTTTTTGCTGCTCTGATTCATC

In100 candidate1211 (in intron):

LOCUS ENSG00000156103

DESCRIPTION Matrix metalloproteinase-16 precursor (EC 3.4.24.-) (MMP-16) (Membrane-type matrix metalloproteinase 3) (MT-MMP 3) (MTMMP3) (Membrane-type matrix metalloproteinase) (MT3-MMP) (MT3MMP) (MMP- X2).

[Source:Uniprot/SWSSPROT;Acc:P51512]

AAAATATGTTGGATCTCTTAACTACATTCTAAATTTTCCATTTTCTCCATCCCGTGTCTCAATATTCTTTAAATACAGCA

TTACTTATTCTCTCGGTCAT

In100 candidate1212 (in intron):

LOCUS ENSG00000156103

DESCRIPTION Matrix metalloproteinase-16 precursor (EC 3.4.24.-) (MMP-16)  
(Membrane-type matrix metalloproteinase 3) (MT-MMP 3) (MTMMP3) (Membrane-  
typematrix

metalloproteinase) (MT3-MMP) (MT3MMP) (MMP- X2).

[Source:Uniprot/SWISSPROT;Acc:P51512]

ACCTACAACATATATAACTATTTGCTGTTGTTATTGGTTTTTTGTACTTGTTTTTGTCTTCCCCTCTTCCAGTGCCTTCT  
CTGGTTTTAGTTGACCATTT

In100 candidate1213 (in intron):

LOCUS ENSG00000114857

DESCRIPTION NK-tumor recognition protein (Natural-killer cells cyclophilinrelated  
protein) (NK-TR protein). [Source:Uniprot/SWISSPROT;Acc:P30414]

TGTTTCTTCTCCCATTTAAATGTGATATATTTAACTTGCTTACTATTTTTTTCCTATGTATTTTATTTTCAGTTGGTCGC  
ATTATGTTTCAGCTCTTCTC

In100 candidate1214 (in intron):

LOCUS ENSG00000073417

DESCRIPTION High-affinity cAMP-specific and IBMX-insensitive 3',5'-cyclic  
phosphodiesterase 8A (EC 3.1.4.17). [Source:Uniprot/SWISSPROT;Acc:O60658]

TTTTAAGGGTTTTTTTCTGGTAACCTAGTATATCATGTTTTTCTAATATTTATAAATATTTTCTTTCTTTCCATTCAGAC  
TTTATTTTTTTATCTATTTGA

In100 candidate1215 (in intron):

LOCUS ENSG00000158560

DESCRIPTION Cytoplasmic dynein 1 intermediate chain 1 (Dynein intermediate chain 1, cytosolic) (DH IC-1) (Cytoplasmic dynein intermediate chain 1).

[Source:Uniprot/SWISSPROT;Acc:O14576]

ATGCTATGTGGTTTGCACACTTGATCCTTCCATCTCATGACAATAACTTCCATAGCCATCTCTCTGGATTTTTTTCAGCT  
ATTTGTTTTTCATGATTCTGC

In100 candidate1216 (in intron):

LOCUS ENSG00000163625

DESCRIPTION WD repeat and FYVE domain-containing protein 3 (Autophagy-linked FYVE protein) (Alfy). [Source:Uniprot/SWISSPROT;Acc:Q8IZQ1]

CTATTTTAAATCACCTTAACTAGTCCTTGAGCTGCCTCTAAATCATTTATCTTCTAAACTCTTATTCAGCACCGTTTACT  
CATTTATGAATCATTTTTTTT

In100 candidate1217 (in intron):

LOCUS ENSG00000163625

DESCRIPTION WD repeat and FYVE domain-containing protein 3 (Autophagy-linked FYVE protein) (Alfy). [Source:Uniprot/SWISSPROT;Acc:Q8IZQ1]

CATGTTTGTAAGTGTGTTCTATTTGTTGCATTTGTTCTTTGTTCTTCCTCCCTTCTTTTCTTGCCTTCTCAGGTTTAAAC  
AGCATTTTCTATGATTTCTT

In100 candidate1218 (in intron):

LOCUS ENSG00000163625

DESCRIPTION WD repeat and FYVE domain-containing protein 3 (Autophagy-linked FYVE protein) (Alfy). [Source:Uniprot/SWISSPROT;Acc:Q8IZQ1]

CAAACAAACCTCTGGTCTAGGGCCCACATAGTAGTAGGGACCTTGGGTCTAACTGCTCTTGAACATATTTTCCACCAGTC  
CTTCTCTGTGTAGTTGCTTA

In100 candidate1219 (in intron):

LOCUS ENSG00000163625

DESCRIPTION WD repeat and FYVE domain-containing protein 3 (Autophagy-linked  
FYVE protein) (Alfy). [Source:Uniprot/SWISSPROT;Acc:Q8IZQ1]

AGTAACATTGGCTATTGTCTGTTTCCCTCATATTCTTTCAAGTTATACTTCTTTTGCTAGCTTTCAGGTGTTAATATCCT  
GGTCTTACATCTTTCTTAC

In100 candidate1220 (in intron):

LOCUS ENSG00000163625

DESCRIPTION WD repeat and FYVE domain-containing protein 3 (Autophagy-linked  
FYVE protein) (Alfy). [Source:Uniprot/SWISSPROT;Acc:Q8IZQ1]

CTGGATAGAAATGTTAACACATACTGAATTACTTCCTTCTTTGTTAATGCAGCATGTTTATCAGTTGCTGATTTTGCACT  
TACTGTTATATTCCTCTTCT

In100 candidate1221 (in intron):

LOCUS ENSG00000198001

DESCRIPTION Interleukin-1 receptor-associated kinase 4 (EC 2.7.11.1) (IRAK-)  
(NY-REN-64 antigen). [Source:Uniprot/SWISSPROT;Acc:Q9NWZ3]



AGTTTAGAAAGTAAACCTCTCCACTATGGAGGAGACATTGGTAGTAGGTAACCTCTTTTTGATTG TTCCTTTTGCAGTTT  
TGTCTTCTTTGTCCCATATG

In100 candidate1222 (in intron):

LOCUS ENSG00000115750

DESCRIPTION TATA box-binding protein-associated factor RNA polymerase I  
subnit B (TATA box-binding protein-associated factor 1B) (TBP-associated facto  
1B) (TBP-associated factor RNA polymerase I 63 kDa) (TAFI63) (Transcriptio  
factor SL1). [Source:Uniprot/SWISSPROT;Acc:Q53T94]

AGCTTTATTACACTTCTAATTATGACCTCTTTAACATGTGTTTTTTTTTTCCTTTAGACAGACATTACTTACATTCCTTT  
TTTCTTTTTTTTTTTCTCCT

In100 candidate1223 (in intron):

LOCUS ENSG00000102780

DESCRIPTION Diacylglycerol kinase eta (EC 2.7.1.107) (Diglyceride kinase et)  
(DGK-eta) (DAG kinase eta). [Source:Uniprot/SWISSPROT;Acc:Q86XP1]

GCCGTGATGCTTCCTCTAGCGCTATCTGGGCTTTAACCAATCCATTCCTTTCACATTTTGATTTTCTTTTCTTATCAGAT  
TTTTCTTTGCTTTGTTCTTT

In100 candidate1224 (in intron):

LOCUS ENSG00000102780

DESCRIPTION Diacylglycerol kinase eta (EC 2.7.1.107) (Diglyceride kinase et)  
(DGK-eta) (DAG kinase eta). [Source:Uniprot/SWISSPROT;Acc:Q86XP1]

AACTTTTTTTGAAGAAGTTATCACTGTTCTATAATGTTTAGTGTTTATAACTTATTCCTGTGTTATCCCTATTATCAGAG  
TAGGTTTTTCTCCTTTTCAT

In100 candidate1225 (in intron):

LOCUS ENSG00000173811

DESCRIPTION Coiled-coil domain-containing protein 13.

[Source:Uniprot/SWISSROT;Acc:Q8IYE1]

TTCTTCCTATTCATGTGCATGAGATAACTATTTGTTTAGTTCTTGATTTTATCAGAGTTTATAGTTTATAGTCTTTTCC  
CAGAGTTTATATTTCTCCT

In100 candidate1226 (in intron):

LOCUS ENSG00000170776

DESCRIPTION A-kinase anchor protein 13 (AKAP 13) (Protein kinase A-anchoring protein 13) (Breast cancer nuclear receptor-binding auxiliary protein) (Huan thyroid-anchoring protein 31) (Guanine nucleotide exchange factor Lbc) (KAP-Lbc) (LBC oncogene) (P47) (Lymphoid [Source:Uniprot/SWISSPROT;Acc:Q1280]

AGAGGAAAAAAGGTGTAACCTCTTTTAAAGGTTTTTCGTCATGTTTAACTTATGTGTTATTCCCAGATTTTCTCCGATGT  
TCATACTGTCTCTTGAAACC

In100 candidate1227 (in intron):

LOCUS ENSG00000170776

DESCRIPTION A-kinase anchor protein 13 (AKAP 13) (Protein kinase A-anchoring protein 13) (Breast cancer nuclear receptor-binding auxiliary protein) (Huan thyroid-anchoring protein 31) (Guanine nucleotide exchange factor Lbc) (KAP-Lbc) (LBC oncogene) (P47) (Lymphoid [Source:Uniprot/SWISSPROT;Acc:Q1280]

TGAGAGAAATCTTTCTGGAATATTTGCTGCCTTTAACACCCCCCTCACCCCCCATTTTTCTTTCAGTATATACCACATAAG  
ACTGTCTTTTTTTTTTTTCTT

In100 candidate1228 (in intron):

LOCUS ENSG00000164331

DESCRIPTION Ankyrin repeat family A protein 2 (RFXANK-like 2).

[Source:Unipot/SWISSPROT;Acc:Q9H9E1]

TACCCTGAATAATAAACTATTCTCTTAGGATAACATCACCCAAGATTAATATATTTTCTTCCAGAACTTTCACTATGGT  
TATGTAGACTTTTTTTTTTTC

In100 candidate1229 (in intron):

LOCUS ENSG00000196636

DESCRIPTION ACN9 protein homolog, mitochondrial precursor.

[Source:Uniprot/WISSPROT;Acc:Q9NRP4]

ACAACTGAAGTTTTACATAGGGAGTAGAATTAAGTAAAGAGAGCTTCTGATTGTTTTGTTAAGCCCCTGTTTTTCAGTT  
GGTGCACTTTTTTTTTTCCTT

In100 candidate1230 (in intron):

LOCUS ENSG00000139173

DESCRIPTION Transmembrane protein 117. [Source:Uniprot/SWISSPROT;Acc:Q9H0C3

CCTGCTAAATAATAAAAGTTCTCTAGAACGTTTTAACTGTAATCAACCTCTTCTTACTTCCATGCGATTGCTGTTTCAGGG  
TTCTAGTTCTTTTTTTTGGTT

In100 candidate1231 (in intron):

LOCUS ENSG00000139173

DESCRIPTION Transmembrane protein 117. [Source:Uniprot/SWISSPROT;Acc:Q9H0C3

CTTCTTTTGGATGATGTTGGTGGCAATCTGTCTCTCATTAACCTTTGCTTCCTATTTCTCCTCTATTACTTTTTTTTCAGTT

CTTCTCATTCCTTTTAAATG

In100 candidate1232 (in intron):

LOCUS ENSG00000139173

DESCRIPTION Transmembrane protein 117. [Source:Uniprot/SWISSPROT;Acc:Q9H0C3

AGATGGACTCTCACTAGGGAGGCTTCTTATAACTATTTAATATATATGTGCTTTTTCATTATATCCAGACTTATATTTGC  
TTATTTATTTCTCCATATC

In100 candidate1233 (in intron):

LOCUS ENSG00000139173

DESCRIPTION Transmembrane protein 117. [Source:Uniprot/SWISSPROT;Acc:Q9H0C3

TGCTTTAATATAAGAATTTTAAAAATGTATCCTTAACTTATTAAAGTCTTACATTCACCTATTTTCCCTTCTTCCAGTT  
TGCTTTCTTTTATTTTAATT

In100 candidate1234 (in intron):

LOCUS ENSG00000139173

DESCRIPTION Transmembrane protein 117. [Source:Uniprot/SWISSPROT;Acc:Q9H0C3

AGAAATCTCTTTGTGAATATTTAACATTCTCCTCAAGTCTCATCATGTTTTCCAGTCAACTCCCAGATAATTTGTCTTTT  
TTTTTTTTACTTTTATTTTA

In100 candidate1235 (in intron):

LOCUS ENSG00000180694

DESCRIPTION transmembrane protein 64 [Source:RefSeq\_peptide;Acc:NP\_00100849]

CCTTTGACTAACATTTTTAAATAATCATCATGTTTTCTCTGATTTTGTTTTTCCTAAGTACAGGCAATTACTTGTTCA  
CAATCTCTTGTTAATTCTTT

In100 candidate1236 (in intron):

LOCUS ENSG00000079805

DESCRIPTION Dynamin-2 (EC 3.6.5.5). [Source:Uniprot/SWISSPROT;Acc:P50570]

CCCTGAAAAATTTGCAACTCATTTTCATGGCTAACTTAGATCTCTCATTTTTTATCCCAGTTGTTACAAGTATTCACATAT  
TTTTATTTTTATTTATTTTT

In100 candidate1237 (in intron):

LOCUS ENSG00000184613

DESCRIPTION Protein kinase C-binding protein NELL2 precursor (NEL-like protein  
2) (Nel-related protein 2). [Source:Uniprot/SWISSPROT;Acc:Q99435]

TGCAATTCCCACAAAGTGGAGAAATAATAACTTTGCTTTTTCTTGGTCTCTTCCTCTCTCTTGCTAGTCATTAACAGTC  
CCTCTTTGGTATTTGATTTT

In100 candidate1238 (in intron):

LOCUS ENSG00000038102

DESCRIPTION Rho-guanine nucleotide exchange factor

[Source:RefSeq\_peptide;Ac:NP\_001073948]

TGAATATTTTTAAAGTATAGAAATTATGTATTAGGCATGCAATTAACAAATGTTTCCATTTTGCCATATTTATTTTCAGAT  
CTTCGCCTTTTTGCTTTTTT

In100 candidate1239 (in intron):

LOCUS ENSG00000138639

DESCRIPTION Rho GTPase activating protein 24 isoform 1

[Source:RefSeq\_peptie;Acc:NP\_001020787]

TGCCTGGAGCAACATGAGCAAAGCTAACTTTTAAAATAAGCTCTTTCATTTTTTGCTTTTAAATCTCCTATCATCAGTT  
TACGTTTCACTTATGTTTTA

In100 candidate1240 (in intron):

LOCUS ENSG00000138639

DESCRIPTION Rho GTPase activating protein 24 isoform 1

[Source:RefSeq\_peptie;Acc:NP\_001020787]

ATTTGATAAATATCTCTAATTTTCTAAAATGCTTAAACTCCCTAACACATTGTGTCCTTGCTTTCTTCCTTCTTTCAGCT  
TTACACTTTTCTTCTAGACT

In100 candidate1241 (in intron):

LOCUS ENSG00000147606

DESCRIPTION solute carrier family 26, member 7 isoform a

[Source:RefSeq\_peptide;Acc:NP\_439897]

TGGATTATCTCTCTTTAACATTTAACTTTTGACCATCTCTTTAATTTTGAAATTTTCTTTTCTCACACCTTCAGAGATT  
CCTTGCTAATCTGGTTCTTC

In100 candidate1242 (in intron):

LOCUS ENSG00000147606

DESCRIPTION solute carrier family 26, member 7 isoform a

[Source:RefSeq\_peptide;Acc:NP\_439897]

ATATACTCATCACCTAGATTCTAAAATTAACATTTACTATATTTGCCTTATTAAATATCTATTTATTCCTCTATTCAGTC  
ATCAGTCTATCTTATTTTTT

In100 candidate1243 (in intron):

LOCUS ENSG00000147606

DESCRIPTION solute carrier family 26, member 7 isoform a

[Source:RefSeq\_peptide;Acc:NP\_439897]

TATTACAATATTTATAAATTTTAACAATATCACCTTTATGGTTTTTGTTCCTTTTTATCTTTTTCTTTAAGTCTTCAGGT  
GTTTTGCTTTTTTAAGCCTAT

In100 candidate1244 (in intron):

LOCUS ENSG00000109339

DESCRIPTION Mitogen-activated protein kinase 10 (EC 2.7.11.24) (Stressactivated  
protein kinase JNK3) (c-Jun N-terminal kinase 3) (MAP kinase p49 3F12)

[Source:Uniprot/SWISSPROT;Acc:P53779]

TCTTCGTCTCTTTTGATCTTTGTTGGTTTAACAAATCCAACAAGTCTCTGTTTTATCAGAGACTAGGATTGTAACCTCTG  
CCTTTTTTTGTTTTCCATTT

In100 candidate1245 (in intron):

LOCUS ENSG00000109339

DESCRIPTION Mitogen-activated protein kinase 10 (EC 2.7.11.24) (Stressactivated  
protein kinase JNK3) (c-Jun N-terminal kinase 3) (MAP kinase p49 3F12)

[Source:Uniprot/SWISSPROT;Acc:P53779]

TATATGTACATAACAATTTTTAACACCTTTAATACTTTTTTCACTTTCCTTCCAGATGACTCCTTTATACATGTGCTAAT

TCATCATATGTCTTTTTTCT

In100 candidate1246 (in intron):

LOCUS ENSG00000189079

DESCRIPTION AT-rich interactive domain-containing protein 2 (ARID  
domaincontaining

protein 2) (BRG1-associated factor 200) (BAF200).

[Source:Uniprot/WISSPROT;Acc:Q68CP9]

CCCTACCACTTTCCCCCTTGGTAATCACCATTCTGTTCTGTGTTTCTAACCATTTCTTAATTTGTTTCATCTATCAGAC  
TGTTTGTTTGTTTGTTTGTG

In100 candidate1247 (in intron):

LOCUS ENSG00000160746

DESCRIPTION transmembrane protein 16K (TMEM16K), mRNA

[Source:RefSeq\_dna;Ac:NM\_018075]

CTCCCACTCTGTGGGTTGTCTGTAACTCTGCTGATTGTTTCTTTTGCTGTGCAGAAGCTTTTGTAGTTTAATTAAGTCCC  
ATCTATTTATCTTTATTTTT

In100 candidate1248 (in intron):

LOCUS ENSG00000164715

DESCRIPTION Serine/threonine-protein kinase LMTK2 precursor (EC 2.7.11.1)

(emur tyrosine kinase 2) (Serine/threonine protein kinase KPI-2)

(Kinase/phosphatase/inhibitor 2) (Apoptosis-associated tyrosine kinase 2) (Brain



enrichd kinase) (hBREK) (CDK5/p35-regulated k

[Source:Uniprot/SWISSPROT;Acc:Q8IWU]

TTCCCTTCTAATTAAAGAAATTTAACTAGCTTTTCTTTTCTCTCTTTTTTTTAAAAACCCATTTTTTTGCAGGATTCCTT  
TTATTTTTTAAATAAATTCTC

In100 candidate1249 (in intron):

LOCUS ENSG00000139218

DESCRIPTION SFRS2-interacting protein (Splicing factor, arginine/serine-rich  
2- interacting protein) (SC35-interacting protein 1) (CTD-associated SR protein  
11) (Splicing regulatory protein 129) (SRrp129) (Renal carcinoma antigen NY-REN-  
40). [Source:Uniprot/SWISSPROT;Acc:Q99590]

TATTAACATCCTTTCCCACTTTTCTCATTTTTACCTTTTTATAAGCACCATTTTCCTAGTCTTTTAGGCCAGGATATTGT  
CTCCTTCACTGTAGTTGCTC

In100 candidate1250 (in intron):

LOCUS ENSG00000163629

DESCRIPTION Tyrosine-protein phosphatase non-receptor type 13 (EC  
3.1.3.48)(Protein-tyrosine phosphatase 1E) (PTP-E1) (hPTPE1) (PTP-BAS)  
(Proteintyrosine  
phosphatase PTPL1) (Fas-associated protein-tyrosine phosphatase 1)  
(FAP1). [Source:Uniprot/SWISSPROT;Acc:Q12923]

TAAATAGCATAACTTATTTTTTCTGCTTTTCTTTTTTTTTCCTCAGATTACCTCATTAGTCAAACATGTTTCACACTTTTA  
ACCTGTTAATCCCTTTCTTT

In100 candidate1251 (in intron):

LOCUS ENSG00000111371

DESCRIPTION amino acid transporter system A1

[Source:RefSeq\_peptide;Acc:NP\_01070952]

ATCCCTCTTCTTCTATGTTTTCTATACCTTAGGGAAGAAGATTCCATAACTTCTTTCTGTATTCAATTTTCATGTCAGAA  
AATTCTTCTCTTGCTTTCAT

In100 candidate1252 (in intron):

LOCUS ENSG00000120658

DESCRIPTION proliferation-inducing protein 38 (PIG38), mRNA

[Source:RefSeq\_na;Acc:NM\_017993]

TCTCATCTGTAAAATTATGGTATGGGATCTCTAAAAACATAACTAGCTAACAACAAGTTCTCTGATTCTGTCTTCCAGAG  
CTGTCCTCTATTTTTGTGAC

In100 candidate1253 (in intron):

LOCUS ENSG00000120658

DESCRIPTION proliferation-inducing protein 38 (PIG38), mRNA

[Source:RefSeq\_na;Acc:NM\_017993]

TGTTTTTCTCAATTAATCTAGGTAAAGGTTTGTCAATTTGTTTAACTTTTCGAAAAACCAACTTTTCATTTTCATCAGTC  
ATTTGTATTGTCTTCATTTT

In100 candidate1254 (in intron):

LOCUS ENSG00000120658

DESCRIPTION proliferation-inducing protein 38 (PIG38), mRNA

[Source:RefSeq\_na;Acc:NM\_017993]

ATAAGATACTCTTTAAAAATATATTTTTTGAAAACAAAACATATAACAAGAAGGTTAGTATCCTTTCACATTTTTGCAGAT  
CTTTTTAGTGTCTTACTCTG

In100 candidate1255 (in intron):

LOCUS ENSG00000120658

DESCRIPTION proliferation-inducing protein 38 (PIG38), mRNA

[Source:RefSeq\_na;Acc:NM\_017993]

TCTGTGTTGTTTCTGTTAACCTGCGTTTTAATGCATTTACCCATTTATCTGCTTTATACTGACCTATTTTTCCAGGTCTC  
CCTTCTTTGGAGTGAGTTTC

In100 candidate1256 (in intron):

LOCUS ENSG00000196367

DESCRIPTION Transformation/transcription domain-associated protein  
(350/400kDa PCAF-associated factor) (PAF350/400) (STAF40) (Tra1 homolog).

[Source:Uiprot/SWISSPROT;Acc:Q9Y4A5]

GTAAAGTAAGTCTTGGGCCTTCACAACCAAAACATAACCAAGTTACTATTTACTGCTTCTATCAGGACAAAGCTCTCCAC  
TTGTTTTCTGTTTGTCTGTC

In100 candidate1257 (in intron):

LOCUS ENSG00000197302

DESCRIPTION Zinc finger protein 720. [Source:Uniprot/SPTREMBL;Acc:Q7Z2F6]

TCATTTGGTCATGGGCTTTTTCTCATTGGATTTTTTTTATAACTGCTTCAATCTCCTTTCTTATTATTGGTCTGTTTCAGTG  
TTTCTGTTTCTTTGTGATTT

In100 candidate1258 (in intron):

LOCUS ENSG00000197302

DESCRIPTION Zinc finger protein 720. [Source:Uniprot/SPTREMBL;Acc:Q7Z2F6]

AGTCTCTGGTAACCACTGTTATACTCTGCTTATATCAGCTTTTTTTTCCTTTTCTTTTCTTTTTTTTTTTAAGACAGA  
GTCTTGCTCTGTTGCCCAGG

In100 candidate1259 (in intron):

LOCUS ENSG00000145700

DESCRIPTION Ankyrin repeat domain-containing protein 31 (Fragment).

[SourceUniprot/SPTREMBL;Acc:Q8N7Z5]

ACTTTATGGATTTCTCAAGCCTCTCTTAACATGTTTCTTTGTATTAGCCTTTTTTTTTTTAATGTGCCAGTGTTAACATTC  
TCAGTGGCTGTTCCCTTCTT

In100 candidate1260 (in intron):

LOCUS ENSG00000198742

DESCRIPTION Smad ubiquitination regulatory factor 1 (EC 6.3.2.-)

(Ubiquitinprotein

ligase SMURF1) (Smad-specific E3 ubiquitin ligase 1) (hSMURF1).

[ource:Uniprot/SWISSPROT;Acc:Q9HCE7]

CAAGCCAAAAATAACATTACTATTCCTTTTTTAAATTTGCCTATATATTTTCCTTTATTAGTGTTCTTTATTTCTCAGGT  
TACTGTCTAATGTTCTTTTT

In100 candidate1261 (in intron):

LOCUS ENSG00000102804

DESCRIPTION TSC22 domain family protein 1 (Transforming growth factor beta--induced transcript 4 protein) (Regulatory protein TSC-22) (TGFB- stimulatd clone 22 homolog) (Cerebral protein 2). [Source:Uniprot/SWISSPROT;Acc:Q1514]

AGTCCCTGTAACCTTTAAATATGTATCTGCCTATCTTATTCTCCTTTCAGCTTTCCTTGATCAGATGCTATGTGCTTTGA  
ACTTCCTTCTCTTATTTATT

In100 candidate1262 (in intron):

LOCUS ENSG00000102804

DESCRIPTION TSC22 domain family protein 1 (Transforming growth factor beta--induced transcript 4 protein) (Regulatory protein TSC-22) (TGFB- stimulatd clone 22 homolog) (Cerebral protein 2). [Source:Uniprot/SWISSPROT;Acc:Q1514]

GTCAATTCCTGATTGAGGGGTGTTTAAGTCTTTAACTATGATAGTGGATTTGACTAGTCCTCCTTACATTTCTATCAGTT  
TTTGTCTCATATTTTGATGC

In100 candidate1263 (in intron):

LOCUS ENSG00000197275

DESCRIPTION DNA repair and recombination protein RAD54B (EC 3.6.1.-) (RAD54homolog B). [Source:Uniprot/SWISSPROT;Acc:Q9Y620]

AGAAACTGTAACTAGACTCATATTTCTCCCAAATCTGCTTTTTCTTTCGAAGGTCTTATCTCAGTTGGTCTGTGAATC  
ATCTTTGATTTCTTCTCTCT

In100 candidate1264 (in intron):

LOCUS ENSG00000083635

DESCRIPTION Nuclear fragile X mental retardation-interacting protein 1 (Nuclear FMRP-interacting protein 1). [Source:Uniprot/SWISSPROT;Acc:Q9UHK0]

TGTGTATTCTGCTGACTGGCCTAACTTAAGGATTGTTTTTCTTTGTTTATTTTGGTATCTCATTAGTTAGCATCCAGTT

CATTTTGTTGCCATTGTTTA

In100 candidate1265 (in intron):

LOCUS ENSG00000130158

DESCRIPTION Dedicator of cytokinesis protein 6.

[Source:Uniprot/SWISSPROT;Ac:Q96HP0]

AAATTCTCCATCTTTTGTCTCATTTTTGCTCATCTTTTCTTCTAACTTTAAAAGTTTCTGTTTGCTGACTTCCAGATTG

ATCATCCATGTGTCTGCTTC

In100 candidate1266 (in intron):

LOCUS ENSG00000113163

DESCRIPTION Goodpasture antigen-binding protein (EC 2.7.11.9) (GPBP) (Collaen type IV alpha-3-binding protein) (StAR-related lipid transfer protein 11 (StARD11) (START domain-containing protein 11)).

[Source:Uniprot/SWISSPROT;cc:Q9Y5P4]

CCTGGCTTTTTGTTGTTGTTTCCCACGTTTTTAACTCTGTTTTTTGTTTTTTTAACTCTGTCAGCCCTCTTTTCATCACT

TGTCACCTTAATTCTTCTTT

In100 candidate1267 (in intron):

LOCUS ENSG00000166579

DESCRIPTION Nuclear distribution protein nudE-like 1 (Protein Nudel) (Mitosnassociated

protein 1). [Source:Uniprot/SWISSPROT;Acc:Q9GZM8]

TGTGTACCATACCTACTCTTTAACCTCATCAAGAGTATTACCCATTTTTTTAGTGTGTTTGTTTTTATCAGCCATCTCTT  
GCTTTCACCTTCCTTTCTATT

In100 candidate1268 (in intron):

LOCUS ENSG00000164941

DESCRIPTION Integrator complex subunit 8 (Int8) (KAONASHI protein 1)  
(KAONASHI1). [Source:Uniprot/SWISSPROT;Acc:Q75QN2]

TTAAGTTTGCCCTCTTTCTATAACTCTGGGCCCTTGTTCCCTTCACAGTTTTCAGTTGATGCTTATTGTCAGGTATTAT  
TTGTTTTTGTTTTTGTTTTT

In100 candidate1269 (in intron):

LOCUS ENSG00000133026

DESCRIPTION Myosin-10 (Myosin heavy chain 10) (Myosin heavy chain, nonmuscl  
IIB) (Nonmuscle myosin heavy chain IIB) (NMMHC II-b) (NMMHC-IIB) (Cellularmyosin  
heavy chain, type B) (Nonmuscle myosin heavy chain-B) (NMMHC- B).  
[Source:Uniprot/SWISSPROT;Acc:P35580]

TAACACATGAATTCTTAATTGTAGTTACTGGTTTTCTTTTTTGTTTTGTTTTGTTTTGTTTTGTTTTTCAGTTTTAGAA  
TTTTCATTGGGGTTTTTCCT

In100 candidate1270 (in intron):

LOCUS ENSG00000171241

DESCRIPTION SHC SH2 domain-binding protein 1.  
[Source:Uniprot/SWISSPROT;Acc:Q8NEM2]

TTTCTGCCAATTGTTGAGAGAGGGGTGTTGAAGTCTCTAACTATAACTGAATTGTTTGTTTGCCTTTTCAGTACTATTA  
GTTTTTGCTTCACATATTTT

In100 candidate1271 (in intron):

LOCUS ENSG00000163810

DESCRIPTION Protein-glutamine gamma-glutamyltransferase 4 (EC 2.3.2.13)  
(Trnsglutaminase-4) (TGase-4) (Prostate transglutaminase) (TGP) (TG(P))  
(Prostte-specific transglutaminase) (Fibrinoligase).

[Source:Uniprot/SWISSPROT;Ac:P49221]

AATAAATAAATAAATAAAAAATAAATAATTAAAAAATAAGTGTTAGCATAACACTTTCATCTACTATCTATATTCCAGTT  
TGGTCACTTTTTTTTTTAATT

In100 candidate1272 (in intron):

LOCUS ENSG00000156471

DESCRIPTION Phosphatidylserine synthase 1 (EC 2.7.8.-) (PtdSer synthase 1)  
PSS-1) (Serine-exchange enzyme I). [Source:Uniprot/SWISSPROT;Acc:P48651]

GAATTAACCTCTTTGCTGTATTAAATATTCTGATTCTTGATCACGCTGCATCTCTCTTTATTCCCATTTTCTTCTCAGTC  
TTTCTATGCACTTTGCTATT

In100 candidate1273 (in intron):

LOCUS ENSG00000145063

DESCRIPTION CDNA FLJ33534 fis, clone BRAMY2007411.

[Source:Uniprot/SPTREMBLAcc:Q8N2B8]

AGTGGTTTTTTTTTTTTTAACCTTATTGGTATATTTTTTACCCCTTTCTTTGCTCATCTCAGGCCTTCCTTCTGCGTTCAA  
TTTTCTTCTTTTTTGAAGCAC



In100 candidate1274 (in intron):

LOCUS ENSG00000118777

DESCRIPTION ATP-binding cassette sub-family G member 2 (Placenta-specific  
APbinding

cassette transporter) (Breast cancer resistance protein) (Mitoxatrone  
resistance-associated protein) (CD338 antigen) (CDw338).

[Source:Unipot/SWISSPROT;Acc:Q9UNQ0]

ATAACACTGAACATTTTGTAGTTTCTGAGTAGACCTTTTTATTTACACCTTTTTCATCTTATTCTTCCACCTTCAGTA  
CTTTTCTTTTCTTCTTAG

In100 candidate1275 (in intron):

LOCUS ENSG00000104324

DESCRIPTION plasma glutamate carboxypeptidase

[Source:RefSeq\_peptide;Acc:NP057218]

GTAGATTTGTCACCAATTGCAAAGCCTTTTCTGACCCTCATAGAAATAACTATCAACTCTCTCCTCTATATTTTCCAGAT  
TTCTTGGTATGTTTCATCTCT

In100 candidate1276 (in intron):

LOCUS ENSG00000104324

DESCRIPTION plasma glutamate carboxypeptidase

[Source:RefSeq\_peptide;Acc:NP057218]

ACCTGGTCATTCATTTGTTTAATCGCTTGACTGTACTAACTCTGTGATGTCTATTTCTCCTACACTGTTTCAGCTTCTGAT  
GTTCTGTGTTTAGATTGTTTT

In100 candidate1277 (in intron):

LOCUS ENSG00000104324

DESCRIPTION plasma glutamate carboxypeptidase

[Source:RefSeq\_peptide;Acc:NP057218]

TTCTAACATTTTCTATTAAAGTTGCTATTTTGCTCCTTTTTTCTCCTTGTTTGCTTTCTATTGGATTCAGTGGTTTTTC  
TTACCCTCTCTCCTCATTTT

In100 candidate1278 (in intron):

LOCUS ENSG00000160868

DESCRIPTION Cytochrome P450 3A4 (EC 1.14.13.67) (Quinine 3-monooxygenase)

(YPIIIA4) (Nifedipine oxidase) (Taurochenodeoxycholate 6-alpha- hydroxylase)(EC  
1.14.13.97) (NF-25) (P450-PCN1). [Source:Uniprot/SWISSPROT;Acc:P08684]

EXON

AACTCTTAACCTCGTGTAGAGTGATTCTTCCCACTTTTATTGACTTATTTTTTCAGATTTGTTTTAACTCTTCCTGGTCC  
TCTGCTTTTCCATAAAAATT

In100 candidate1279 (in intron):

LOCUS ENSG00000102893

DESCRIPTION Phosphorylase b kinase regulatory subunit beta (Phosphorylase  
knase subunit beta). [Source:Uniprot/SWISSPROT;Acc:Q93100]

CACATGATTATTAGTCCATTAAAAAAGAATTATTCCTTTATGTTTAACTTACTGGTTTTATAGCTTTCTTCTCTTTCAGTT  
CATATTTACAAATTTTCTT

In100 candidate1280 (in intron):

LOCUS ENSG00000147649

DESCRIPTION Protein LYRIC (Lysine-rich CEACAM1 co-isolated protein) (3D3/lyic) (Metastasis adhesion protein) (Metadherin) (Astrocyte elevated gene-1 potein) (AEG-1). [Source:Uniprot/SWISSPROT;Acc:Q86UE4]

CACTGCCCTACTTTAGGACTTTATTACCTTTTGTTTAGACTGTTCTAACATCATCCTAACTAGTTTTCTGCTTCCAGTT  
TCTTTTTTGGCCAATCTTTTC

In100 candidate1281 (in intron):

LOCUS ENSG00000134318

DESCRIPTION Rho-associated protein kinase 2 (EC 2.7.11.1) (Rho-associated, oiled- coil-containing protein kinase 2) (p164 ROCK-2) (Rho kinase 2). [Souce:Uniprot/SWISSPROT;Acc:O75116]

TGATAACATATCTACAACATACATTCTTTTTTCCCCTATTGCTCCAAATCTGCTTCATTTCTTTGGTTTTAGATTCAGTG  
ATTGTTTCCACTATCCATTT

In100 candidate1282 (in intron):

LOCUS ENSG00000134318

DESCRIPTION Rho-associated protein kinase 2 (EC 2.7.11.1) (Rho-associated, oiled- coil-containing protein kinase 2) (p164 ROCK-2) (Rho kinase 2). [Souce:Uniprot/SWISSPROT;Acc:O75116]

GTCTTCCATTCTTTTTCTGTCTTTTTTGGTTTTAACTGATCATTTAATGTGATTTTCATTTTCTCTCCTTTCTTAGCAGAT  
TGTTTATACTTTTTTTTTTTG

In100 candidate1283 (in intron):

LOCUS ENSG00000134318

DESCRIPTION Rho-associated protein kinase 2 (EC 2.7.11.1) (Rho-associated,

oiled- coil-containing protein kinase 2) (p164 ROCK-2) (Rho kinase 2).

[Souce:Uniprot/SWISSPROT;Acc:O75116]

AGTTATGTTAATCTTGTAATAATGATGACAAACCTCTCTTCATATATTTGTCAGTCATTTCTGTTTTGTGAATTACCTG  
TTTATATCTTTTAACTCTTT

In100 candidate1284 (in intron):

LOCUS ENSG00000170310

DESCRIPTION Syntaxin-8. [Source:Uniprot/SWISSPROT;Acc:Q9UNK0]

AACAATATTAATTCTTCCAATCCATGAGCATGAAATAACTTTGCCTTTGTCTGTATCCTCTTCAATTTCTTTCATCAGTG  
TTTTGTAGTTTTTCTTTTAG

In100 candidate1285 (in intron):

LOCUS ENSG00000170310

DESCRIPTION Syntaxin-8. [Source:Uniprot/SWISSPROT;Acc:Q9UNK0]

TAGTTTGAGGAGAATTGATATTTTAACACTATTGAGTCTCAAATTCCTCTCAGCAATGCCTTTTAGTTTTGCTATACGTG  
TCTTATATATCTTTTATCCT

In100 candidate1286 (in intron):

LOCUS ENSG00000170310

DESCRIPTION Syntaxin-8. [Source:Uniprot/SWISSPROT;Acc:Q9UNK0]

AGTGTTGTCTAGAGCATTCTGGAGTAACGCAATCTCCCTTCCTTTCTCTTCTCTTCATTTTTCTCCAGTGCTGTGTG  
CGTATGTCTTTTTCTCTTTC

In100 candidate1287 (in intron):

LOCUS ENSG00000136152

DESCRIPTION Conserved oligomeric Golgi complex component 3 (Vesicle dockingprotein SEC34 homolog) (p94). [Source:Uniprot/SWISSPROT;Acc:Q96JB2]

AGATACTATTTAATAACCTTTTCTTTATTTTTCTCAAAATGTCTTTCAGATCCACTGTTAGTCACTTTTGGTTTCTTAAT  
GTTCACTCTTTTGACTCTTA

In100 candidate1288 (in exon):

LOCUS ENSG00000166596

DESCRIPTION WD repeat protein 16 (WD40-repeat protein up-regulated in HCC). [Source:Uniprot/SWISSPROT;Acc:Q8N1V2]

AGTCCTGTTGAAGACTGAGTTTAGATAACTCCAACACTAGTCTTCATTTCTCACAGCTCTGTTTTTGTTCCTTGAGTCAAT  
TTTTCTCTTTTTCTTTATAG

In100 candidate1289 (in intron):

LOCUS ENSG00000163818

DESCRIPTION leucine zipper transcription factor-like 1  
[Source:RefSeq\_peptie;Acc:NP\_065080]

CCCGTAATCTTCCTACCCTAAAATAACCACTTTTAACTTTCTGTTGTTTTCCCTCCCAGCCGTGTTTCTATGCATTCGTA  
CACTTTGAACTTTTATTTTC

In100 candidate1290 (in intron):

LOCUS ENSG00000171295

DESCRIPTION Zinc finger protein 440. [Source:Uniprot/SWISSPROT;Acc:Q8IYI8]

EXON

AGGCGTGAGCCACTGCACCTGGCTAACAACCTAATTCATTATGGTTTTTTTTCCCCCAGAGCTTGTTTTCTTTAAAGCTC

GTTTTTATTTTCCTTTTCAAT

In100 candidate1291 (in intron):

LOCUS ENSG00000138640

DESCRIPTION Protein FAM13A1. [Source:Uniprot/SWISSPROT;Acc:O94988]

AGTGCTATTGAAGGCAAATAACTATAGTCATGTTTATTTGTGTTTCCAGTTTGCTTTGTTTTGATTAAATTTTTGTTTTG  
TGTTTTGTTTTTGAATTTTA

In100 candidate1292 (in intron):

LOCUS ENSG00000196757

DESCRIPTION Zinc finger protein 700. [Source:Uniprot/SWISSPROT;Acc:Q9H0M5]

EXON

AGCCACTGCACCTGGCTAACAACTTAATTCGTAATGGTTTACTTTTTTCCCCCAGAGCTTGTTTTCTTTTCTTTCTAGCT  
GGTTTTTATTTTCCTTTTCAA

In100 candidate1293 (in intron):

LOCUS ENSG00000104361

DESCRIPTION NIPA-like protein 2. [Source:Uniprot/SWISSPROT;Acc:Q9H841]

TAGCTATTATAAATAACCTTACTTCAAAATCAATTTTGTCTTCTTTTCCTGTGTTACAGGTATCATATTTTATCAGGAAT  
TCCTTGGTGCTCCTTTTCTC

In100 candidate1294 (in intron):

LOCUS ENSG00000123200

DESCRIPTION Zinc finger CCCH domain-containing protein 13.

[Source:Uniprot/WISSPROT;Acc:Q5T200]

TCATTGTATCTTCTTTTCATTCTTAACTTTCAAATTTTTCATCTCTTTATCTGTTTCGCCTCTAGGTCATATTCTCAGGCT  
TACCTTCTAGTTTACCAATT

In100 candidate1295 (in intron):

LOCUS ENSG00000197054

DESCRIPTION zinc finger protein 440 like

[Source:RefSeq\_peptide;Acc:NP\_00102771]

AAAGTGCTGGGATTATAGACATGAGCAAATGCATGTGGATAACAACCTTAATTTGTAGTGGTTTGCTTTTTTCCCCCAGAG  
CTTGTTTTCTTTTCTTTCTA

In100 candidate1296 (in intron):

LOCUS ENSG00000007237

DESCRIPTION Growth-arrest-specific protein 7 (GAS-7).

[Source:Uniprot/SWISSROT;Acc:O60861]

CTCGAAGTAACCCTCCTCCCCATCCTCTTCTTTACCCTTACTCCCTTTTCTTTCTGTTTGACAGCTCTATTGAGATATA  
TCCCCATTCTATTCTATTCT

In100 candidate1297 (in intron):

LOCUS ENSG00000007237

DESCRIPTION Growth-arrest-specific protein 7 (GAS-7).

[Source:Uniprot/SWISSROT;Acc:O60861]

GAAATACCACACCTTGGATTTAACTTGCATTTGCATTTCTTCATTGCTAGTCAGGTCGTGTCTGTTTTCAAATGTTTAT

TTACCATTGAATTCCTCT

In100 candidate1298 (in intron):

LOCUS ENSG00000007237

DESCRIPTION Growth-arrest-specific protein 7 (GAS-7).

[Source:Uniprot/SWISSROT;Acc:O60861]

TTAGCACCAAGACTTTCTTTTGCTTCCCATTCCTAGCATAACCCTCTTGCTCCTCTGTTTCTCTTGATCTTCTCAGAT

TTCTGTTTTTATTCGTGTCC

In100 candidate1299 (in intron):

LOCUS ENSG00000113231

DESCRIPTION High-affinity cAMP-specific and IBMX-insensitive 3',5'-cyclic  
phosphodiesterase 8B (EC 3.1.4.17) (HSPDE8B).

[Source:Uniprot/SWISSPROT;Acc:O5263]

GCTGTGCTCTGTGGGAGTAACTGAGGTCTGGGAGAATCTGCTTGTTTCCCCTTTTCTTCTCTTTTTCCTTCTTCCAGCT

CTTATGTGTACTTCTCTGCC

In100 candidate1300 (in intron):

LOCUS ENSG00000102910

DESCRIPTION peroxisomal LON protease-like

[Source:RefSeq\_peptide;Acc:NP\_11378]



CAAAC TCACCTGCCAAGCACCCGCCTCCTATTCCTAACTCTACTGGAGGTGTTGTGTTTTTCAGTTTAGAGCTTCTCCTTT  
CCTGGCAGTTATCCCTTATT

In100 candidate1301 (in intron):

LOCUS ENSG00000102910

DESCRIPTION peroxisomal LON protease-like

[Source:RefSeq\_peptide;Acc:NP\_11378]

AACCTCTGTGCTTTGTGTAAC TTTTGCTAAATTCCTGTCTTTGTCTTCTTGGAACAGTCTTCTACTTGTTACAGGATCT  
TCCTATCTTTTGGATTTTAT

In100 candidate1302 (in intron):

LOCUS ENSG00000183801

DESCRIPTION Olfactomedin-like protein 1 precursor.

[Source:Uniprot/SWISSPRO;Acc:Q6UWY5]

TAGTAGCCTGAAGTGGCACTAAGGAGCTAGAAAAC TGTAACTCCTTCGTTTTACTTCATTTTTCTCCTTTCTTCCAGTTT  
AGATCCTTTATCATCCCAT

In100 candidate1303 (in intron):

LOCUS ENSG00000166387

DESCRIPTION Liprin-beta-2 (Protein tyrosine phosphatase receptor type f  
polypeptide-interacting protein-binding protein 2) (PTPRF-interacting  
proteinbnding

protein 2). [Source:Uniprot/SWISSPROT;Acc:Q8ND30]

TTGGACCTTGTCCTCCTTTTTTAATTCATGCTTCCTAACTCCTCTTTTATATTTTCACTTGTTGTCTCTGTTTGCAGCA  
TTCTTCAAATCTATCTTCCT

In100 candidate1304 (in intron):

LOCUS ENSG00000166387

DESCRIPTION Liprin-beta-2 (Protein tyrosine phosphatase receptor type f polypeptide-interacting protein-binding protein 2) (PTPRF-interacting protein-binding protein 2). [Source:Uniprot/SWISSPROT;Acc:Q8ND30]

TCATCTGCTATTTAACCTGTTCACTTAATTAATTTGCTTGGCTGCATTCTTTATTTTGGTTTGTATTTTTTTTTTCAGAT  
TTTCCTATTTTTTTAAAATCA

In100 candidate1305 (in intron):

LOCUS ENSG00000132549

DESCRIPTION Vacuolar protein sorting-associated protein 13B (Cohen syndrome protein 1). [Source:Uniprot/SWISSPROT;Acc:Q7Z7G8]

AGTTTAACTTCCTCCTTTCCATTTGGATTTTCTTTCCTTTTTTTTTTTTTTTTTTTTTTTGGTGTGGAAACCCAGGACTTTCT  
TTTCTTTCTTTTATTTTTTG

In100 candidate1306 (in intron):

LOCUS ENSG00000132549

DESCRIPTION Vacuolar protein sorting-associated protein 13B (Cohen syndrome protein 1). [Source:Uniprot/SWISSPROT;Acc:Q7Z7G8]

AGCTTGATATTTCACTGCTCTCTATTTAACCTAAATTGGGCTATCCATTATCATTTTCAGTAAGGCATGTTACCTTGCCTT  
GTTCAACTTTTCCTTTTTCA

In100 candidate1307 (in intron):

LOCUS ENSG00000132549

DESCRIPTION Vacuolar protein sorting-associated protein 13B (Cohen syndrome protein 1). [Source:Uniprot/SWISSPROT;Acc:Q7Z7G8]

AATCCTTTGTGCTCTGCCTATTCATCCCTTCCTCTCCCTAACCCTGGCAACCCTGATCTTTTTACTGTCCTCACAGTT  
TTGCCTTTTCTAGACTGTCA

In100 candidate1308 (in intron):

LOCUS ENSG00000132549

DESCRIPTION Vacuolar protein sorting-associated protein 13B (Cohen syndrome protein 1). [Source:Uniprot/SWISSPROT;Acc:Q7Z7G8]

CTGTTGAAGTAAATAATTGTTGGGTACCTATTTACTCTAACCAAATATTAACCTTTTTATTCTTTTCAGCTTTTAAGTAC  
TGCCCATTCCACTTCTATAT

In100 candidate1309 (in intron):

LOCUS ENSG00000132549

DESCRIPTION Vacuolar protein sorting-associated protein 13B (Cohen syndrome protein 1). [Source:Uniprot/SWISSPROT;Acc:Q7Z7G8]

ATAAATAGACGTAGCACTTGTGATCTCCATTACAAATATATTAACCTTTGTTTTGTTCTTTTGTTTTGGCAGGAAAGTTT  
TTGTTGGTGTTTTTTTTTTTT

In100 candidate1310 (in intron):

LOCUS ENSG00000132549

DESCRIPTION Vacuolar protein sorting-associated protein 13B (Cohen syndrome protein 1). [Source:Uniprot/SWISSPROT;Acc:Q7Z7G8]

GTCTACCCTATTATAACATTTTAAAAATATTAACATGTTTCTTCTTACACTTTCACCTTCTTAGCCTTCAGCAGTTT  
TCCTTTTGGAGTTTACTTTT

In100 candidate1311 (in intron):

LOCUS ENSG00000102921

DESCRIPTION NEDD4-binding protein 1 (N4BP1) (Fragment).

[Source:Uniprot/SWISPROT;Acc:O75113]

CATTTCCATAAAACATTCAAGTAAAGGAGATACAACCTTTTAACTTAAAGTGTGTTTATTACCATTCCAGTTTATATAAT  
CCTGTCAACCCTTACCTTTT

In100 candidate1312 (in intron):

LOCUS ENSG00000140575

DESCRIPTION Ras GTPase-activating-like protein IQGAP1 (p195).

[Source:Uniprt/SWISSPROT;Acc:P46940]

AACACTGCTAATATAATACCTGGTAACGTTTTGAGTACTTACTCTGTGCCAGGCACTGTTCTTAGTATTTTATATGTACT  
ATCATCTCTTTAATCCTCAT

In100 candidate1313 (in intron):

LOCUS ENSG00000197857

DESCRIPTION Zinc finger protein 44 (Zinc finger protein KOX7) (Gonadotropin  
inducible transcription repressor 2) (GIOT-2).

[Source:Uniprot/SWISSPROT;Ac:P15621]

AATTTCTAACCCATATCATTTTTTCTTTCTGATGAACTTCTTTTTTTTTTAACTCAGACCAGGTAATTTCAATTGTTT  
TACCTTCATTTTAGTTTTTTT

In100 candidate1314 (in intron):

LOCUS ENSG00000184305

DESCRIPTION

GAATGATGATTTCCAATTCATCCGTGTCCCTGGATTACCTGATGTAACATTTTTCCTTCTTTTATTTTTCACAGAAATT  
ATTTTATTAACATCTTTTTC

In100 candidate1315 (in intron):

LOCUS ENSG00000184305

DESCRIPTION

AGTGGTGATATCCCCTTTAACATTTTAAATACATCTATTTGATTCTTCTCTCTTTTCTTCTTTATTAGTCTTAGCAGTCT  
GTCGATTTTGTTGATCTTTT

In100 candidate1316 (in intron):

LOCUS ENSG00000184305

DESCRIPTION

AGTTGAATAACTCAATTTTTTATTGCTATTTCTTTAATATCCTTGTCAGATATATTTTCCTCATGTGTTACATCCCCTA  
TGGACACTTTAGTTTTCTTT

In100 candidate1317 (in intron):

LOCUS ENSG00000184305

DESCRIPTION

AAATTAACCTTACAATTGGTTTAGATGGCCTTTTTTTCTCTCTGCTGGTCTTTCCTTTTCTCTGCTGCCTCTGCCAGCT  
GCTTATACTGCTGTTCTTTT

In100 candidate1318 (in intron):

LOCUS ENSG00000184305

DESCRIPTION

TATGAAATTCATTATTTGTAATTTTAACATTTCTGCCTTATCTGACTCTGGTCTGATGCTCATTTCATTCTCTTCCAGCT  
GTGTTTATTTCCCTTTTAGTG

In100 candidate1319 (in intron):

LOCUS ENSG00000152208

DESCRIPTION Glutamate receptor delta-2 subunit precursor (GluR delta-2).

[Surce:Uniprot/SWISSPROT;Acc:O43424]

TGAAGAGCTGCCCCACTCTGGAGATTTGTTTCACTGTGATTAAACATTGTACCTCTCATTTACTTACTTGTTCAGAGGTTTTA  
TTCAGTTAGTATCTTTTTTCT

In100 candidate1320 (in intron):

LOCUS ENSG00000152208

DESCRIPTION Glutamate receptor delta-2 subunit precursor (GluR delta-2).

[Surce:Uniprot/SWISSPROT;Acc:O43424]

CACTATGATTTTTATCACCATGGACTGCTCCTTAACCTGACATGTATTCTTTTGCATCTGACTTCTTTCTTCCCTCAGGC  
TTTTGAGACTTTCCCATGTT

In100 candidate1321 (in intron):

LOCUS ENSG00000152208

DESCRIPTION Glutamate receptor delta-2 subunit precursor (GluR delta-2).

[Surce:Uniprot/SWISSPROT;Acc:043424]

AATCCCTAACACACCATATTTTCTATCTTCCTTCCTGCTCTATATTTGTCCATAGTACTTCTGTATAACATGTTTCAGTT  
TTTAATTAATTATCTCATTT

In100 candidate1322 (in intron):

LOCUS ENSG00000152208

DESCRIPTION Glutamate receptor delta-2 subunit precursor (GluR delta-2).

[Surce:Uniprot/SWISSPROT;Acc:043424]

GGAAATTAAATGAATATATGCCTGAATGGATGAATAAATAAAGTTAACCATCTGCTCCTTCTTGTTTCGTTTCCTTCAGAA  
CTCTTTATTCATATTGGTT

In100 candidate1323 (in intron):

LOCUS ENSG00000152208

DESCRIPTION Glutamate receptor delta-2 subunit precursor (GluR delta-2).

[Surce:Uniprot/SWISSPROT;Acc:043424]

ATCCCAAAGTATGCTTCTATATTATAACATAGTAGCCCATGTGTAACTTTTTTTTTCTCTTAATCTTTACAGTTTGTC  
AAATCTCTGCTCCATGCTTT

In100 candidate1324 (in intron):

LOCUS ENSG00000152208

DESCRIPTION Glutamate receptor delta-2 subunit precursor (GluR delta-2).

[Surce:Uniprot/SWISSPROT;Acc:043424]

TCCCATTTTAACCACGCTGGTCTCTTTGCTTATTTTTAGTCTCAGCATATTCTAACTTAGTTTATTTATGATTGCTTTTC  
TATTTGCTTGGATTTCTCCT

In100 candidate1325 (in intron):

LOCUS ENSG00000152208

DESCRIPTION Glutamate receptor delta-2 subunit precursor (GluR delta-2).

[Surce:Uniprot/SWISSPROT;Acc:O43424]

AGGCCTCCTAAATGCTATTTATTTTCTAGCTGTTGGTGTTAGATAACCTAATTATACAATAGTCTCTTCCAGATATTTTC  
TTTTTCTTATAGCTTATAGC

In100 candidate1326 (in intron):

LOCUS ENSG00000152208

DESCRIPTION Glutamate receptor delta-2 subunit precursor (GluR delta-2).

[Surce:Uniprot/SWISSPROT;Acc:O43424]

TGTGTAACCTTATTCATTAGTCCTGATATATCATTTGCATTCTTTACTACTCCCAACTGTTATTTTTTATTCTGCAGTAGAA  
GTTTGTCTTTATTCTTTTTT

In100 candidate1327 (in intron):

LOCUS ENSG00000152208

DESCRIPTION Glutamate receptor delta-2 subunit precursor (GluR delta-2).

[Surce:Uniprot/SWISSPROT;Acc:O43424]

AGGTCCCTACCTCCGTCTTTACTGACATCTGCTAACAAATCCTAGCTTTGCCCATTTTCCTTCAGCCGCACTGGTCTTTG  
TTTTTTCTTCCATGTGTATT

In100 candidate1328 (in intron):



LOCUS ENSG00000152208

DESCRIPTION Glutamate receptor delta-2 subunit precursor (GluR delta-2).

[Source:Uniprot/SWISSPROT;Acc:O43424]

TGATTGCAAAAACAAACAAGCAAAGAAGAACTAATGAAACTACACTTTAACTTCATCCCTTCTTTTAAGCTTTCAGTA  
GTTTCCATTTATATCTTACT

In100 candidate1329 (in intron):

LOCUS ENSG00000163104

DESCRIPTION SWI/SNF-related matrix-associated actin-dependent regulator of  
chromatin subfamily A containing DEAD/H box 1 (EC 3.6.1.-) (ATP- dependent  
helicase 1) (hHEL1). [Source:Uniprot/SWISSPROT;Acc:Q9H4L7]

TGAACATTTTCATTTAGGTGGAATTATATAATATGTAACTTTTATGTCTAGCCTCTTATTTTTTAATTTTCAGAAAAATGT  
GTTTTATTTGTTTTTTCTTT

In100 candidate1330 (in intron):

LOCUS ENSG00000163104

DESCRIPTION SWI/SNF-related matrix-associated actin-dependent regulator of  
chromatin subfamily A containing DEAD/H box 1 (EC 3.6.1.-) (ATP- dependent  
helicase 1) (hHEL1). [Source:Uniprot/SWISSPROT;Acc:Q9H4L7]

GGGAATTTTTTTTTTCCCCTAACAAAACAATAACTTCAAAATAGCCTGTTGCCTCATTTTCTTTCATTATCTCAGAAAAT  
CTTTAAATCACTTTTTTCCT

In100 candidate1331 (in exon):

LOCUS ENSG00000163104

DESCRIPTION SWI/SNF-related matrix-associated actin-dependent regulator of  
chromatin subfamily A containing DEAD/H box 1 (EC 3.6.1.-) (ATP- dependent

hlicase 1) (hHEL1). [Source:Uniprot/SWISSPROT;Acc:Q9H4L7]

AAGTGAAATTTAGAAAGTGAAGTTGTCTATTTGATATTTAACTCTTTATTAAATCTTTCCTTTAAATTTCTGCCTGTCAGTC  
TATATTGCTGTTTTTTATTAT

In100 candidate1332 (in intron):

LOCUS ENSG00000197299

DESCRIPTION Bloom syndrome protein (EC 3.6.1.-) (RecQ protein-like 3) (DNA  
elicase, RecQ-like type 2). [Source:Uniprot/SWISSPROT;Acc:P54132]

TACAATACTATAAATCATACTAGCTGAATAAATAACAAAGGGTTTTGTGTCCTCGTGGCTTTTACTATTCTGTCAGTA  
CTTGCTCCGCTGCTTTTTATT

In100 candidate1333 (in intron):

LOCUS ENSG00000132842

DESCRIPTION AP-3 complex subunit beta-1 (Adapter-related protein complex 3  
eta-1 subunit) (Beta3A-adaptin) (Adaptor protein complex AP-3 beta-1 subuni)  
(Clathrin assembly protein complex 3 beta-1 large chain).

[Source:UniprotSWISSPROT;Acc:O00203]

GTAGATGTATTTGTTTTAATGGAGTTTCTTTAATTGTAACCTTAAATGTGCTGAGTTTTCTTTATTTTCAGCCTACTAGTTA  
CTGTTATCCTGGCTTCATTT

In100 candidate1334 (in intron):

LOCUS ENSG00000132842

DESCRIPTION AP-3 complex subunit beta-1 (Adapter-related protein complex 3 eta-1 subunit) (Beta3A-adaptin) (Adaptor protein complex AP-3 beta-1 subunit) (Clathrin assembly protein complex 3 beta-1 large chain).

[Source:UniprotSWISSPROT;Acc:O00203]

TTGTAGCTCTTGACTGGCTTAGTAACAAATGAGATGCCATTTCTTTGTGTTTCCTATTCTCCCTATCTGTATATCCAGCT  
ATTATTTTTCTCTTTTGCTA

In100 candidate1335 (in intron):

LOCUS ENSG00000132842

DESCRIPTION AP-3 complex subunit beta-1 (Adapter-related protein complex 3 eta-1 subunit) (Beta3A-adaptin) (Adaptor protein complex AP-3 beta-1 subunit) (Clathrin assembly protein complex 3 beta-1 large chain).

[Source:UniprotSWISSPROT;Acc:O00203]

CTCCCACTCTGTGGGTTGTCTGTAACTCTGCTGATTATTTCTTATGCTGTGCAGAAGCTTTCTAGTTTAATTAAGTCCC  
ATCTATTTATCTTTGTTTTT

In100 candidate1336 (in exon):

LOCUS ENSG00000132842

DESCRIPTION AP-3 complex subunit beta-1 (Adapter-related protein complex 3 eta-1 subunit) (Beta3A-adaptin) (Adaptor protein complex AP-3 beta-1 subunit) (Clathrin assembly protein complex 3 beta-1 large chain).

[Source:UniprotSWISSPROT;Acc:O00203]

TTTCCCCCTTTTTGCTTTGCTAACCAAAGAGCATATATTTTACTGTCAGTTGTCTCAACTCTTGAATCCATGTGGCGTTT  
TCTCTGTCCTGCTGCTTCTT

In100 candidate1337 (in intron):

LOCUS ENSG00000163110

DESCRIPTION PDZ and LIM domain protein 5 (Enigma homolog) (Enigma-like PDZ and LIM domains protein). [Source:Uniprot/SWISSPROT;Acc:Q96HC4]

AGTGTAACATGACTGACCATTCTATTTTTTTATCCACAGACTTTTTTTTTTAATGGCTAATTTGTATTTTCCTGTTT  
TATTTTCTTCCCAAAGTTT

In100 candidate1338 (in intron):

LOCUS ENSG00000132554

DESCRIPTION Regulator of G-protein signaling 22 (RGS22).

[Source:Uniprot/SWISSPROT;Acc:Q8NE09]

AGCCTAATTCCTACCAAGATCTGAGTCTGATTCCAAGAGCTCTAACCACCTTCTATTATTTATTTATGTCTTCCAGCACTT  
ACTTCTCTTGTTGGCTAATT

In100 candidate1339 (in intron):

LOCUS ENSG00000132554

DESCRIPTION Regulator of G-protein signaling 22 (RGS22).

[Source:Uniprot/SWISSPROT;Acc:Q8NE09]

AAGCTAACTCTTCATTTGGCTTCTGTAGCATTACTCTGACTTGGTTTACCTCTTATCTCTCTGACTTCTATTTCTCAGGT  
TCTTTTACTATTTCTTCTGA

In100 candidate1340 (in intron):

LOCUS ENSG00000151779

DESCRIPTION neuroblastoma-amplified protein

[Source:RefSeq\_peptide;Acc:NP\_06993]

ACCGAAGCAAACGAAACAATAAAAAATCTCAAACAAATCTAACATAGAGTTTCACATCCTCTTTTTCTTCTTTGCAGCT  
GATAGCCTTTCTCTCTATTT

In100 candidate1341 (in intron):

LOCUS ENSG00000151779

DESCRIPTION neuroblastoma-amplified protein

[Source:RefSeq\_peptide;Acc:NP\_06993]

CTGTTTGGCACATCTTTATAAAAAGTTTCCATTAACAACAATAATAATACTCATTTTATGCTTTAATACTTATCTCAGTT  
CCTTCTTTGTCCTTTATAGG

In100 candidate1342 (in intron):

LOCUS ENSG00000151779

DESCRIPTION neuroblastoma-amplified protein

[Source:RefSeq\_peptide;Acc:NP\_06993]

ATTTTATTAAGGCACCTTATATAGCAAAAGCTGGAAATAACCTTCAACCCCATGCATTTATCCCTTTTATAGTTCAGACC  
TTCATTTTAACATCCTTAAT

In100 candidate1343 (in intron):

LOCUS ENSG00000163827

DESCRIPTION Leucine-rich repeat-containing protein 2.

[Source:Uniprot/SWISSROT;Acc:Q9BYS8]

GAAACGCCATCTCAAAAAAAAAAAAAAAAAAATCTAACTATAATTGTTGAATTGTCTCTTTGTCCTTTTAATTCCATCAGTT  
TTTACTTCATATATTTTACG

In100 candidate1344 (in intron):

LOCUS ENSG00000166405

DESCRIPTION resistance to inhibitors of cholinesterase 3 homolog

[Source:ReSeq\_peptide;Acc:NP\_078833]

AGGTCATAACTATCTCATGTGATTTCTCTGATTTTGCCTCCTTTCGGTTTTCTTTCTGTTTTCCAAACAGATTATCTCTT  
TTGTTTTAATCCTTCAACAG

In100 candidate1345 (in intron):

LOCUS ENSG00000085365

DESCRIPTION Secretory carrier-associated membrane protein 1 (Secretory carrier  
membrane protein 1). [Source:Uniprot/SWISSPROT;Acc:O15126]

CTCTGCTCCCTTTTCTGGCCACCTTCCTATAACTTAGCTTCTGTTTGTCACTCTTTCTACCATGGCTGTTGTCAGCTTCT  
ACTGCTGCTGTTATAGTTCC

In100 candidate1346 (in intron):

LOCUS ENSG00000085365

DESCRIPTION Secretory carrier-associated membrane protein 1 (Secretory carrier  
membrane protein 1). [Source:Uniprot/SWISSPROT;Acc:O15126]

TGCTTAATTTTTAACTCACTTTCAAGTCTGGATTTGCTGTCTTGTCACCCTTCAAATACTCATTCCTCTTTTTGTCAGCT  
TATACCATTTGCTTTATTCC

In100 candidate1347 (in intron):

LOCUS ENSG00000104450

DESCRIPTION Sperm-associated antigen 1 (Infertility-related sperm protein Sag-1) (HSD-3.8). [Source:Uniprot/SWISSPROT;Acc:Q07617]

AACAATTTTAAACATCTAAAAACAATGTTGAGGTATATGTATTCTGTAACCTAGAATGCTGCTTTTTAACTTTCAGCC  
TTCTCATTTTATTGGCTTGA

In100 candidate1348 (in intron):

LOCUS ENSG00000130413

DESCRIPTION Serine/threonine-protein kinase 33 (EC 2.7.11.1).  
[Source:Uniprt/SWISSPROT;Acc:Q9BYT3]

CTAGGTGAGAATCTTAATTTTTACTTCGTTTTAAATTTTTGTTTTTTAACAAAGTTATCTACAATTTTGTTTTTTCAGAA  
AGTCATTATTGTTTTTTTTT

In100 candidate1349 (in intron):

LOCUS ENSG00000138696

DESCRIPTION Bone morphogenetic protein receptor type IB precursor (EC 2.7.1.30) (CDw293 antigen). [Source:Uniprot/SWISSPROT;Acc:O00238]

CAATAATGTACATGTTCTTCTGTATGTTGCTTTGTACATGTAATAGTATAACATAAGGGTTTTTTTGTTTTGGTCCAGAT  
TTTTTGTAACATTATTTTT

In100 candidate1350 (in intron):

LOCUS ENSG00000138696

DESCRIPTION Bone morphogenetic protein receptor type IB precursor (EC 2.7.1.30) (CDw293 antigen). [Source:Uniprot/SWISSPROT;Acc:O00238]

CTGATGGGGAAGATGTATCTTTTGAAATGTGTCTTGATATTAATAAGTTTTTGCTTCTTACCCAATTTTACAGATTAA  
ATATTTCTCATAATTTCTTT

In100 candidate1351 (in intron):

LOCUS ENSG00000113273

DESCRIPTION Arylsulfatase B precursor (EC 3.1.6.12) (ASB) (Nacetylgalactosmine-4-sulfatase) (G4S). [Source:Uniprot/SWISSPROT;Acc:P15848]

TGCTTTGAGGAGACTTTTTATTCATTTTGAAGGCTTTGTTCTGAAGTAACCTTGGAAGTGCTTTGGTCTCTGTTTCAGAT  
AGTACCCTTCTCTTTTCCTT

In100 candidate1352 (in intron):

LOCUS ENSG00000113273

DESCRIPTION Arylsulfatase B precursor (EC 3.1.6.12) (ASB) (Nacetylgalactosmine-4-sulfatase) (G4S). [Source:Uniprot/SWISSPROT;Acc:P15848]

TGTCCTGTTTAACTGGTTCACCTCCTCATATTATTTTCTCTCTACTCCGTTTGCTGTTTTCTTTTGGCCCTCAGTGCTC  
TGTTTTCTGGGCGTCTGCTTT

In100 candidate1353 (in intron):

LOCUS ENSG00000186106

DESCRIPTION Ankyrin repeat domain-containing protein 46 (Ankyrin repeat small protein) (ANK-S). [Source:Uniprot/SWISSPROT;Acc:Q86W74]

CCTTACTGCTTATAATTTGGATTTTAAATTTCTATTGTGTTTTTATTTAACTTATAGTCTTTTTTTTTTTTAGTCCCAGTC  
CTCTTTAATACTGTTTTTTC



In100 candidate1354 (in intron):

LOCUS ENSG00000188803

DESCRIPTION FLJ45455-like protein. [Source:Uniprot/SPTREMBL;Acc:Q4PL63]

CTTAAC TTACACTTCCTGCCTATACAACAATCAATGTGATTATTCTACTTTTTTTTCTGCCTCCTTTCTCTTCCAGTT  
TTTAGTTGCATTATTTCTAC

In100 candidate1355 (in intron):

LOCUS ENSG00000007174

DESCRIPTION Ciliary dynein heavy chain 9 (Axonemal beta dynein heavy chain ).

[Source:Uniprot/SWISSPROT;Acc:Q9NYC9]

AGCTGGTTAGAGGTTCTAGGCTTTTGGACACCATGGTAACTTAAGTCCTGCCCTTTTCTTTGTTCCACCAGATAAGGCCTC  
TTTGTTTTGTTTTCTGTTTC

In100 candidate1356 (in intron):

LOCUS ENSG00000007174

DESCRIPTION Ciliary dynein heavy chain 9 (Axonemal beta dynein heavy chain ).

[Source:Uniprot/SWISSPROT;Acc:Q9NYC9]

GTGGTGTTGAAATATTTATTATTAATGCATTAGCATTCTGTATTATAACTGTATTTTTATTTCATTCTGTGTTTCAGATCAC  
TGCCAGATTTTTTTATATCT

In100 candidate1357 (in intron):

LOCUS ENSG00000174226

DESCRIPTION CDNA FLJ36587 fis, clone TRACH2013928.

[Source:Uniprot/SPTREMBLAcc:Q8N9S9]

TTTTACTTTTTCTAACACAATTTTCACTTTTGTAATGGCTTTATTTTCCTCTTCCATTTCTTCCGTGAACTTTACCAGCT  
CACTTTTATATCCTTTTGTT

In100 candidate1358 (in intron):

LOCUS ENSG00000163116

DESCRIPTION

TTATTCCAAGCAAGACAAGGTCTGTAGAATACTCTAACACATATCATAGTCTTCTTGACATATGCTTTTGTTCTTCAGTA  
TTTAAATCCTATCCTTTTCT

In100 candidate1359 (in intron):

LOCUS ENSG00000163116

DESCRIPTION

AGGTACACCTAACAAACGTAGATTTGTTCTTTTACACAGTTCCATATTTCTTGGAGGCTTTGTTTCATTCATTTTCATTT  
TTTTCTCTCATTTTCTCTTC

In100 candidate1360 (in intron):

LOCUS ENSG00000163116

DESCRIPTION

AGTGGCTGAAACAATTTACATTCCTACTAACAATGTATGAGTGTTCCCTTTTCTCTGCAGCTTTGCCAGCATCTATTTTT  
TTTTTTTTTTTACTTTTTAAT

In100 candidate1361 (in intron):

LOCUS ENSG00000163116

DESCRIPTION

TCCTTTTCTTTGAGACTTCCCTCACTAATGACATCATCTCTGTAATAACTTGAATAAAACATCTCATTATTTGTTTCAGTG  
CATTTTGTCTTTCTCATCAG

In100 candidate1362 (in intron):

LOCUS ENSG00000197093

DESCRIPTION Galactose-3-O-sulfotransferase 4 (EC 2.8.2.-) (Galbeta1-3GalNAc3'- sulfotransferase) (Beta-galactose-3-O-sulfotransferase 4).

[Source:Unipot/SWISSPROT;Acc:Q96RP7]

GAATCCCCTCCTCCTAATTAACACCCCCTATGTGTTTCTTTCTTCACAGCCATGTTCTCCTCGCTGTTTCTATTAGCCCC  
TTCTATGAGAATACTTTATT

In100 candidate1363 (in intron):

LOCUS ENSG00000177200

DESCRIPTION Chromodomain-helicase-DNA-binding protein 9 (EC 3.6.1.-)  
(ATPependent

helicase CHD9) (CHD-9) (Chromatin-related mesenchymal modulator) (ReMM)  
(Chromatin remodeling factor CHROM1) (Peroxisomal proliferator-activaed receptor  
A-interacting complex 320 k [Source:Uniprot/SWISSPROT;Acc:Q3L8U]

AAAGAGGTTTCCTAATCCTATTTTCTTTTCTATTGCTCTTGTTATTACATAACTATTTCTTAATCCATTTTTATGCAGTC  
TTACTCCTAATTTTTTGTTGG

In100 candidate1364 (in intron):

LOCUS ENSG00000177200

DESCRIPTION Chromodomain-helicase-DNA-binding protein 9 (EC 3.6.1.-)  
(ATPependent

helicase CHD9) (CHD-9) (Chromatin-related mesenchymal modulator) (ReMM)

(Chromatin remodeling factor CHROM1) (Peroxisomal proliferator-activated receptor A-interacting complex 320 k [Source:Uniprot/SWISSPROT;Acc:Q3L8U]

TAACACCGTTGATAATCTAGTCTGTTATATTTTAGTCCTTGTTGCTTATCATTCTCCACAGGCATCTCCTTTGCTTGTC  
ATGCCAAACTACTTGTTATT

In100 candidate1365 (in intron):

LOCUS ENSG00000177200

DESCRIPTION Chromodomain-helicase-DNA-binding protein 9 (EC 3.6.1.-)

(ATPdependent

helicase CHD9) (CHD-9) (Chromatin-related mesenchymal modulator) (ReMM)

(Chromatin remodeling factor CHROM1) (Peroxisomal proliferator-activated receptor A-interacting complex 320 k [Source:Uniprot/SWISSPROT;Acc:Q3L8U]

AGTGAAAGTGGTGAGAGGGAATGAAGTGTAAGTATGGTTGGTTCCTTAATGTTGCTTCAGAATATCTTTGTGTTTCTTCT  
GATTTCTGCTTCCAACATA

In100 candidate1366 (in intron):

LOCUS ENSG00000177200

DESCRIPTION Chromodomain-helicase-DNA-binding protein 9 (EC 3.6.1.-)

(ATPdependent

helicase CHD9) (CHD-9) (Chromatin-related mesenchymal modulator) (ReMM)

(Chromatin remodeling factor CHROM1) (Peroxisomal proliferator-activated receptor A-interacting complex 320 k [Source:Uniprot/SWISSPROT;Acc:Q3L8U]

AAAGCCATTAACTAACTAAATACCTATTTTAATTTTACCAGTTTTTCAACTAATGTCCCTTTTTGTTCCAAGATCCTAC  
AATGTATTTGGTTTTTCTTT

In100 candidate1367 (in intron):

LOCUS ENSG00000066923

DESCRIPTION Cohesin subunit SA-3 (Stromal antigen 3) (Stromalin 3) (SCC3 homolog 3). [Source:Uniprot/SWISSPROT;Acc:Q9UJ98]

GTTTCTGGCTATCTGTCTCTCCCTCTCCTAACCCAAACCTCATTTTTCAAACCCTTTGTTGTTACAGGTTATCCTGCCAG  
CCTTGACTCTTGTCTATTTT

In100 candidate1368 (in intron):

LOCUS ENSG00000168785

DESCRIPTION Tetraspanin-5 (Tspan-5) (Transmembrane 4 superfamily member 9) Tetraspan NET-4). [Source:Uniprot/SWISSPROT;Acc:P62079]

ATTTTAGCACATAGAAAGGCTTAAACCCTCTTGTGAACTCCTACTTAACCATTTCTTTATTATACTCTTCTTACTCAGAT  
TTATAAATTTTCCTTCCTTT

In100 candidate1369 (in intron):

LOCUS ENSG00000151247

DESCRIPTION Eukaryotic translation initiation factor 4E (eIF4E) (eIF-4E) (mRNA cap-binding protein) (eIF-4F 25 kDa subunit).  
[Source:Uniprot/SWISSPROT;cc:P06730]

TTAACATAGATCTCTGTTGTTTGCTGCTTCAGTCTGATATCCAAACACTTGTTGCATTGCCCTTTTTTTGGTATCAGTCT  
TTGTCCTAGTGCCTTTCTTT

In100 candidate1370 (in intron):

LOCUS ENSG00000197872

DESCRIPTION Protein FAM49A. [Source:Uniprot/SWISSPROT;Acc:Q9H0Q0]

TATACATTTAGCACCTATTAATTCTAACTATTTGGATAGTATTTTTGTATACATTTTTTCATCCACAGACACCTTCTAA  
GGTGATATTTTCATTTCTTT

In100 candidate1371 (in intron):

LOCUS ENSG00000065559

DESCRIPTION Dual specificity mitogen-activated protein kinase kinase 4 (EC .7.12.2) (MAP kinase kinase 4) (JNK-activating kinase 1) (c-Jun N-terminal inase kinase 1) (JNKK) (SAPK/ERK kinase 1) (SEK1).

[Source:Uniprot/SWISSPRO;Acc:P45985]

TTATAGATGGCATCTTCTTAGAATCCTAAGAATTTTGATAACTGGATAGGAAAGACTACTTAACTATCCTTTCTTCAGTC  
CTGGCTCTTTTTTCTGCGTG

In100 candidate1372 (in intron):

LOCUS ENSG00000065559

DESCRIPTION Dual specificity mitogen-activated protein kinase kinase 4 (EC .7.12.2) (MAP kinase kinase 4) (JNK-activating kinase 1) (c-Jun N-terminal inase kinase 1) (JNKK) (SAPK/ERK kinase 1) (SEK1).

[Source:Uniprot/SWISSPRO;Acc:P45985]

GTTAATTAGTTAATTAGGGACTGAACTAGATTTTCTCTCCTAACTAGATTCTGTGGTCAACTTTTTCAGTGCTGTATTCTG  
TTTTCATTATAGACTTTCCC

In100 candidate1373 (in intron):

LOCUS ENSG00000104490

DESCRIPTION Neurocalcin-delta. [Source:Uniprot/SWISSPROT;Acc:P61601]

GGCAAGAATG TTCCTAAAACATTTATGTTGTTTATTAACATACAAAAGCTTTTATTTTCATCCAGTCAAACCTATCAATT  
TACCCTTTTGTGATCTATTTC

In100 candidate1374 (in intron):

LOCUS ENSG00000104490

DESCRIPTION Neurocalcin-delta. [Source:Uniprot/SWISSPROT;Acc:P61601]

CTCATTTTATAAAAGTTCAAATAACATGATCTCATTTTCAACTTTTCATGACTTAATTTTTTTTCATTTTTCAGGCTTA  
GTTTTTTTAATGCTTGTGTT

In100 candidate1375 (in intron):

LOCUS ENSG00000104490

DESCRIPTION Neurocalcin-delta. [Source:Uniprot/SWISSPROT;Acc:P61601]

TAACTACCTTTTTATCACCTTCTTGTTTTTCAGTTCCACCTCTCACCTTTATTTTCAGAGGTATCTGGTGCCTCTAGTTC  
CTGAGCTTTTTCTGGCTTTT

In100 candidate1376 (in intron):

LOCUS ENSG00000104490

DESCRIPTION Neurocalcin-delta. [Source:Uniprot/SWISSPROT;Acc:P61601]

GTTAGGTCTCTTGGATCTCTCCTCTATGGTCTTAACTTTTTTCCCATATTTTCTTTCTTCCCTTTTATGTGCATTCAGAG  
GATTTTCTCAATTTTGTCTT

In100 candidate1377 (in intron):

LOCUS ENSG00000179136

DESCRIPTION CDNA FLJ34690 fis, clone MESAN2000894.

[Source:Uniprot/SPTREMBLAcc:Q8NAV9]

TTTTCTCCCATTCGTGTGTGTTGTCTGTAACTCTGCTGATTATTTATTTTGCTGTGCAGCTTTTATGTTTAATTAAGTCC  
CATCTATTTATATTTGTTTT

In100 candidate1378 (in intron):

LOCUS ENSG00000085514

DESCRIPTION Paired immunoglobulin-like type 2 receptor alpha precursor  
(Inhibitory receptor PILR-alpha) (Cell surface receptor FDF03).

[Source:Uniprot/WISSPROT;Acc:Q9UKJ1]

TGCCTGTGGCTATCTGTTCCCTAATTTATTCCTACGTAACCTTTCATTACTTTCTTCCTCTGAGTTTCTTTACAGCTGGC  
TCCTCCTGTTTGGGGTTTTT

In100 candidate1379 (in intron):

LOCUS ENSG00000175356

DESCRIPTION Signal peptide, CUB and EGF-like domain-containing protein 2  
precursor (Protein CEGP1). [Source:Uniprot/SWISSPROT;Acc:Q9NQ36]

TTTCTTGTCCTCCCTGAGGAAATTAATTACGAGATTTTAACTCCTCTTCTGTTCTCTAGATTATCTTTGTTTCCTCCAGGT  
TTCTTTTTTCCCGTTGGTTT

In100 candidate1380 (in intron):

LOCUS ENSG00000102468

DESCRIPTION 5-hydroxytryptamine 2A receptor (5-HT-2A) (Serotonin receptor 2)  
(5- HT-2). [Source:Uniprot/SWISSPROT;Acc:P28223]



AGTTGACAAAGGAAAATGCTCTAAGAAAAGATAACTTTTGTTCCTTATTCCCTTTTTATTTTTTAAGCATCAGAGCTATCA  
AACTGCATTCTCTTATTTTT

In100 candidate1381 (in exon):

LOCUS ENSG00000102468

DESCRIPTION 5-hydroxytryptamine 2A receptor (5-HT-2A) (Serotonin receptor 2)  
(5- HT-2). [Source:Uniprot/SWISSPROT;Acc:P28223]

AGACTTCAAATGTTATTCAATAACTATTGCTGCTTTCTCTTCTACTTCTTGTGCTTTACTCTGAATTTCCAGTGTGGTCT  
TGTTTAATATTTGTTCCCTCT

In100 candidate1382 (in intron):

LOCUS ENSG00000140718

DESCRIPTION fatso [Source:RefSeq\_peptide;Acc:NP\_001073901]

ATGCTCTGTTAACCTTTTTCTCCTGTCTTTTTCCTCTCTGTATTTTCATTTTGGATAATTTGCCTTGCTGTGTCTTCAGGT  
TCATTATTCTTTTCTTCTAT

In100 candidate1383 (in intron):

LOCUS ENSG00000172955

DESCRIPTION Alcohol dehydrogenase 6 (EC 1.1.1.1).  
[Source:Uniprot/SWISSPROTAcc:P28332]

AACTACATCTTACCTTAGCTAACTCCATCTTTGCTTGTTC AATTCTTACTTCCAGAAAGCACATTTTATTCTTATATTGC  
TTTGTACACATTCTTTTCCC

In100 candidate1384 (in intron):

LOCUS ENSG00000181555

DESCRIPTION Histone-lysine N-methyltransferase SETD2 (EC 2.1.1.43) (SET  
domin- containing protein 2) (hSET2) (Huntingtin-interacting protein HYPB)

(Huntingtin yeast partner B) (Huntingtin-interacting protein 1) (HIF- 1)

(p231HP). [Source:Uniprot/SWISSPROT;Acc:Q9BYW2]

CCTTCATTATGCCCCCTCCCTCCCAACTCCACAAATTTACAATATAACCTGAGCCTATTTTCATCATATTTTGTCAGGA  
TTATTCTTTTCATCTGCCTG

In100 candidate1385 (in intron):

LOCUS ENSG00000184014

DESCRIPTION Rab6-interacting protein 1 (Rab6IP1).

[Source:Uniprot/SWISSPROTAcc:Q6IQ26]

TTTTGTAACCTTTGACCTTCTAACTTTCTTGTGCCTTTTTTGACCACTAGATTTTTCAGATTTGTATCCCTCTAGGTGGT  
GGGTTCTTTGGTTCTTTCTC

In100 candidate1386 (in intron):

LOCUS ENSG00000006744

DESCRIPTION Zinc phosphodiesterase ELAC protein 2 (EC 3.1.26.11) (Ribonuclease  
Z 2) (RNase Z 2) (tRNase Z 2) (tRNA 3 endonuclease 2) (ElaC homolog protin 2)  
(Heredity prostate cancer protein 2). [Source:Uniprot/SWISSPROT;Acc:QBQ52]

AGAGTTTAGATGCTCTGTTTCTCAAAATAACCCATACTTTTATTTCTTTTAAATTTTTTTCCAGTGCCCTGTCAGCCT  
CCGTACATTTTTTTTTTTTTT

In100 candidate1387 (in intron):

LOCUS ENSG00000006695

DESCRIPTION Protoheme IX farnesyltransferase, mitochondrial precursor (EC 25.1.-) (Heme O synthase). [Source:Uniprot/SWISSPROT;Acc:Q12887]

AGAGGTCAAAGTAACGCTCTTTTCTAATTATCTCTTTCTTTTCTTTTCTTTTAAATCTTCAGTTATATTTTGCCATTCCTGAT  
GGTTTTTGTCTTCTGAATC

In100 candidate1388 (in intron):

LOCUS ENSG00000166478

DESCRIPTION Zinc finger protein 143 (SPH-binding factor).  
[Source:Uniprot/SISSPROT;Acc:P52747]

AGTATTTGTCTTTTTGTAAGTAAATAGCCTATGCTAATTTTATTCTCAGCAGGGGTCTTTTTTTTTTTTTTTTTTTT  
TTTACCACCCCCCATACGG

In100 candidate1389 (in intron):

LOCUS ENSG00000039319

DESCRIPTION Zinc finger FYVE domain-containing protein 16 (Endofin)  
(Endosome-associated  
FYVE domain protein). [Source:Uniprot/SWISSPROT;Acc:Q7Z3T8]

CTTTTAACCTAGTTTTTGTATTTTCTCTTCCTCGTCCCTCTGGGCATTACTTTAGGTAATTTCTTCAGATAGGTCTTCG  
ATGTCATTCAGTTCTCTCTT

In100 candidate1390 (in intron):

LOCUS ENSG00000133789

DESCRIPTION Switch-associated protein 70 (SWAP-70).  
[Source:Uniprot/SWISSPRT;Acc:Q9UH65]

AGGTTTTCTGTAAAATATTTTAAACCATGTTGGCGACTCCTATTTTGGCTATTTAATTTTCTCCTGAATCTAATCCAGGC

CCTTGATTCTCTCTCTTT

In100 candidate1391 (in intron):

LOCUS ENSG00000113318

DESCRIPTION DNA mismatch repair protein Msh3 (Divergent upstream protein)  
(UP) (Mismatch repair protein 1) (MRP1). [Source:Uniprot/SWISSPROT;Acc:P2058]

TGGGAAAGTCTTACCAATTTTATCTTTTCAAAAACTAACTTTGGTTTGTTGATCTTTGTATTTCTTTGTTTCAGTT  
TCATTTATTTCTGCTCTGAT

In100 candidate1392 (in intron):

LOCUS ENSG00000113318

DESCRIPTION DNA mismatch repair protein Msh3 (Divergent upstream protein)  
(UP) (Mismatch repair protein 1) (MRP1). [Source:Uniprot/SWISSPROT;Acc:P2058]

AGGTTTTCTTTTTATCCCCATTAGTAACATGTTATAAGGCTTTACTTTGATACCCAGTTGTTTGTGTGAAGTTTCTCAC  
TTCCTTTTGGCTTTTGTCTA

In100 candidate1393 (in intron):

LOCUS ENSG00000113318

DESCRIPTION DNA mismatch repair protein Msh3 (Divergent upstream protein)  
(UP) (Mismatch repair protein 1) (MRP1). [Source:Uniprot/SWISSPROT;Acc:P2058]

GACATGTTATACTTGAGCACAAATCTTGCTTTTCCCTTTTAACAACTATGTGACCTTTTCAAATTACTACTTCTCAGTG  
TCTCAGTTCTTTTCCTGTAA

In100 candidate1394 (in intron):

LOCUS ENSG00000113318

DESCRIPTION DNA mismatch repair protein Msh3 (Divergent upstream protein)  
(UP) (Mismatch repair protein 1) (MRP1). [Source:Uniprot/SWISSPROT;Acc:P2058]

AGATGGAGGAATTTTGATATCTCTAACTATAGTAGTATGTTTCATCTGTTTCTCTTTGTAGTTCTATCAGCTTTTGCCTCA  
TGTAGTTTGACATTCTCTTG

In100 candidate1395 (in intron):

LOCUS ENSG00000183571

DESCRIPTION

TTGCAAAGAAAAGTATCAAAAACAACTACAATTTAACACCAACCTTCACCCACATTTTTGACTTTTTAGTGTTTCAGTT  
TTATCTTTTTTATGTTGCCTA

In100 candidate1396 (in intron):

LOCUS ENSG00000133812

DESCRIPTION Myotubularin-related protein 13 (SET-binding factor 2).  
[SourceUniprot/SWISSPROT;Acc:Q86WG5]

CTGGGTGATGAAACAAGACCCTATCTCAAAAAAAAAAAGAAAGTGTTGTTTAACCTGCAAGTATTTCTGGATTTTCCAGCT  
ATCTGCCTGTTATTGATTTC

In100 candidate1397 (in intron):

LOCUS ENSG00000113319

DESCRIPTION Ras protein-specific guanine nucleotide-releasing factor 2  
[Souce:RefSeq\_peptide;Acc:NP\_008840]

AGAATTTTTATAACAATTGCTTTTTTTTATGCTCTATTATTATTTTTCTCCCTTAAGTTCTCCCACAGCATATTCCTATCA  
AGACTCTTCTATCTTTTCTT

In100 candidate1398 (in intron):

LOCUS ENSG00000113319

DESCRIPTION Ras protein-specific guanine nucleotide-releasing factor 2

[Source:RefSeq\_peptide;Acc:NP\_008840]

AGAAAATTTAAATTCGCTTATAACCATGGCCATCTTTGATTTTACCTTGTTTTTTCTCTTGCTTTTATTCAGTAGTTC  
ATCAATTTTATTATTCCTT

In100 candidate1399 (in intron):

LOCUS ENSG00000113319

DESCRIPTION Ras protein-specific guanine nucleotide-releasing factor 2

[Source:RefSeq\_peptide;Acc:NP\_008840]

GCTCACCTGTGGCTTCACCTCACACTAACCCCTGTCTCCATTCTCCTTTGGCAGAAGTCACCTTCCGCCTTTTTCCTGG  
CAGTATATTCTTGTTGCATT

In100 candidate1400 (in intron):

LOCUS ENSG00000185013

DESCRIPTION Retinol dehydrogenase 14 (EC 1.1.1.-) (Alcohol dehydrogenase

PA2). [Source:Uniprot/SWISSPROT;Acc:Q9HBH5]

TTGTTCTTCAAATAACAACTTTTGGTTTTTTGATCTTTTGTATATTTTTTCCCATCTCAATTTTCATTCAGTTCAGCTC  
TGATTATGGTTATTTCTTCT

In100 candidate1401 (in intron):

LOCUS ENSG00000068305

DESCRIPTION Myocyte-specific enhancer factor 2A (Serum response factorlikeprotein

1). [Source:Uniprot/SWISSPROT;Acc:Q02078]

CTCTTCATGTTCTTATTTTTCTTTGTCTTCTGTAACATACTAAGTTTATTTATAATCTTTTTTTAATGCCCTTGTCAGTT  
CTGTTAACTTTATCATTTTT

In100 candidate1402 (in intron):

LOCUS ENSG00000164035

DESCRIPTION Endomucin precursor (Endomucin-2) (Mucin-14) (Gastric cancer anigen Ga34). [Source:Uniprot/SWISSPROT;Acc:Q9ULC0]

TGTCACAATTAGTGAACATAACTGATAAATTATTGTAACTAAATTCTGATTCTTTTAGTCTTTACTCAGTCTTTTTT  
CTGTTCCAAGAAATTTGCCT

In100 candidate1403 (in intron):

LOCUS ENSG00000177112

DESCRIPTION

TAAAACACTATAACTTGTTCCCTCCTAATTTTATGTCCTTTAACAAATCTGTCTTTTCCTCCTCTCTTCCCTTTCCAGCCA  
CTAGTATCCTCTATTCTGTT

In100 candidate1404 (in intron):

LOCUS ENSG00000177112

DESCRIPTION

AATTAAACAAGCTCTCTATTCTTTTCTTGAATAAATCTTAAATAATAACCCCTCCCTCTTAATTATATTGCTTTCCAGGA  
TTTTTATTTACCTTGTGTT

In100 candidate1405 (in intron):

LOCUS ENSG00000133800

DESCRIPTION Lymphatic vessel endothelial hyaluronic acid receptor 1 precursor  
(LYVE-1) (Cell surface retention sequence-binding protein 1) (CRSBP-1)  
(Hyaluronic acid receptor) (Extracellular link domain-containing protein 1).

[Source:Uniprot/SWISSPROT;Acc:Q9Y5Y7]

GATTTGCTATTTCTCATGGTTTCATTTAACTTGTACTCCCATCCCATGTATTTCTTTTCTTTTTTCCAGAGATAATT  
TTATTTTATTATTTTATTTT

In100 candidate1406 (in intron):

LOCUS ENSG00000138814

DESCRIPTION Serine/threonine-protein phosphatase 2B catalytic subunit  
alpha isoform (EC 3.1.3.16) (Calmodulin-dependent calcineurin A subunit alpha  
isoform) (CAM-PRP catalytic subunit). [Source:Uniprot/SWISSPROT;Acc:Q08209]

ATTCTTCATAGCTCCATTTAATAACTCTCTCTTCCTCTCTTTTATCTTTCAGCTTTCCTTCACACTCATTCTTTGACAG  
TTTCTCCTCTTTTCTCTGTT

In100 candidate1407 (in intron):

LOCUS ENSG00000138814

DESCRIPTION Serine/threonine-protein phosphatase 2B catalytic subunit  
alpha isoform (EC 3.1.3.16) (Calmodulin-dependent calcineurin A subunit alpha  
isoform) (CAM-PRP catalytic subunit). [Source:Uniprot/SWISSPROT;Acc:Q08209]



AAAATAGAATAACCCCCAAATGCCTCAAATTTAATGACCTAATTTCTCTTTTTCTCCCCTCCTTGTTTAATCTTCAGAT  
TTCTTTTATTACTTACTATT

In100 candidate1408 (in intron):

LOCUS ENSG00000072952

DESCRIPTION JAW1-related protein isoform b

[Source:RefSeq\_peptide;Acc:NP\_56056]

GTCCACTCCTCTATAGAGTCTTCTTTAACTCCCCTCACTAAAGAGTTTCTTTTCCTTCCTCTGAGCTTTCACAGAATGT  
GGTCCATCCCTTGTTTCCTT

In100 candidate1409 (in intron):

LOCUS ENSG00000172497

DESCRIPTION Acyl-coenzyme A thioesterase 12 (EC 3.1.2.1) (Acyl-CoA  
thioestease 12) (Acyl-CoA thioester hydrolase 12) (Cytoplasmic acetyl-CoA  
hydrolase1) (CACH-1) (hCACH-1) (START domain-containing protein 12) (StARD12).

[Soure:Uniprot/SWISSPROT;Acc:Q8WYK0]

GCATTAATAAACTGCTGTTAATCTTATCTGGTTTGTTTTTTATTTTCAGATGTTGTATTTTTTTACCTTAGAAAGTCCAC  
TTTGATTTTTTTTATATTTTC

In100 candidate1410 (in intron):

LOCUS ENSG00000173473

DESCRIPTION SWI/SNF-related matrix-associated actin-dependent regulator of  
hromatin subfamily C member 1 (SWI/SNF complex 155 kDa subunit) (BRG1-associated  
factor 155). [Source:Uniprot/SWISSPROT;Acc:Q92922]

TGATGGGATGGAGATGTTATTGAAAAGAAGTGGGTTTATTAACCCTCCTTATGCTTATGATTTTTATACTACTTTCAGAG  
ATCTGGATTTTCATTTTCCT

In100 candidate1411 (in intron):

LOCUS ENSG00000118965

DESCRIPTION WD repeat protein 35. [Source:Uniprot/SWISSPROT;Acc:Q9P2L0]

TTTAAAGAATTTAGAAAGTGAGAGCTTATTAATAACTAAGCTTAATACGTTTTTTGAATGTCTTATTTTCTAACCCAGTA  
CTATATTTTGTCCCTTTTGA

In100 candidate1412 (in intron):

LOCUS ENSG00000118965

DESCRIPTION WD repeat protein 35. [Source:Uniprot/SWISSPROT;Acc:Q9P2L0]

AGAGTTTAGCCTTTTTCTAGTTCTAAGATACTTGAGTAACTTTTTTTTAGAGATCTATCTTTCCATTTTTTCCAGGTTTT  
GTAAAATAATCCTTTTTTCT

In100 candidate1413 (in intron):

LOCUS ENSG00000176406

DESCRIPTION Regulating synaptic membrane exocytosis protein 2 (Rab3-  
interacting molecule 2) (RIM 2). [Source:Uniprot/SWISSPROT;Acc:Q9UQ26]

TTAACTTAATTTAATAAGTTCGGCCATTGTTGTAGCATTTATTCTACCCTATTTTCTATTTTTCTTTTGATTTCTCAGTT  
ATTTGTATTTTCAGACTTTTT

In100 candidate1414 (in intron):

LOCUS ENSG00000176406

DESCRIPTION Regulating synaptic membrane exocytosis protein 2 (Rab3-interacing molecule 2) (RIM 2). [Source:Uniprot/SWISSPROT;Acc:Q9UQ26]  
AAAATAAATAATACCCTGCTTTTACATTTTAGTTAAGTATTAAGTCTCTAGAATATTCACCTTTTTTCAGGTAACTTTTT  
CCATAAGTATGCCTGCTTTT

In100 candidate1415 (in intron):

LOCUS ENSG00000153064

DESCRIPTION B-cell scaffold protein with ankyrin repeats.  
[Source:Uniprot/SISSPROT;Acc:Q8NDB2]

CAAATGTAGAGTCAAGTCTTCTTTTATTTTCATGAAGAATTTCTTAACTTATATCTAAGTTTACGGTTATTTTTCAGGG  
ACTCCTTTTTTATGTATTTT

In100 candidate1416 (in intron):

LOCUS ENSG00000153064

DESCRIPTION B-cell scaffold protein with ankyrin repeats.  
[Source:Uniprot/SISSPROT;Acc:Q8NDB2]

CTGTAACACGACTGCTCCTCCTATATGTACCATCTTATCCTGCTGTCTTGTCTGTTTCCATGTTTTTCAGCACTTTACCTC  
TTTCACACGTATGATCTTAT

In100 candidate1417 (in intron):

LOCUS ENSG00000145687

DESCRIPTION Single-stranded DNA-binding protein 2 (Sequence-specific single stranded-DNA-binding protein 2). [Source:Uniprot/SWISSPROT;Acc:P81877]  
GCTGTTTGCTATTGTCCTGTAAGTCTTGGATGATCTGTTCTCTTTTTTAATCCCACTTTTTTTCCTCTGTGTTTCAGTT  
TGAGTACTTTTTTCAATCT

In100 candidate1418 (in intron):

LOCUS ENSG00000145687

DESCRIPTION Single-stranded DNA-binding protein 2 (Sequence-specific single stranded-DNA-binding protein 2). [Source:Uniprot/SWISSPROT;Acc:P81877]

TGCTACCTCCTTCTTAAAAATCTAACTTGCTTGACTTTTTATATTTTCCTGATTTTCATCCAGTCACATATCCACCATT  
CTTCTCTATCTCTTTTTTTT

In100 candidate1419 (in intron):

LOCUS ENSG00000145687

DESCRIPTION Single-stranded DNA-binding protein 2 (Sequence-specific single stranded-DNA-binding protein 2). [Source:Uniprot/SWISSPROT;Acc:P81877]

AGCTATATAACATAGCATAGCATTTCCCAAATAAACCATGATTCTTTCTTTCTTTCTTTGTTTTTTATAGCAGTTCTT  
CTCTTTGTCTTTCTGATGGG

In100 candidate1420 (in intron):

LOCUS ENSG00000140470

DESCRIPTION ADAMTS-17 precursor (EC 3.4.24.-) (A disintegrin and metalloproeinase with thrombospondin motifs 17) (ADAM-TS 17) (ADAM-TS17).

[Source:Unirot/SWISSPROT;Acc:Q8TE56]

TGCCACCCCTCCCCTTCCCTAACCCTGGCACCCATTTATCTGTATTCCATCTTTATGATTTTCTCATCCCAATATCAGTT  
TATTTTTCAAATTTTGTTTT

In100 candidate1421 (in intron):

LOCUS ENSG00000139644

DESCRIPTION Bax inhibitor 1 (BI-1) (Testis-enhanced gene transcript)  
(Transmembrane BAX inhibitor motif-containing protein 6).

[Source:Uniprot/SWISSPRO;Acc:P55061]

CACCTACTCATTTAAATTTGTAACCCCAAATCAATACTCATGGCACTTTTTTTTTTTTTTTTTGAGACAGAGTCTCGCTC  
TGTTACTCATGGCACTTTTT

In100 candidate1422 (in intron):

LOCUS ENSG00000154227

DESCRIPTION LAG1 longevity assurance homolog 3.

[Source:Uniprot/SWISSPROT;Ac:Q8IU89]

GTCTAGCTAGCAATCTATTTTGTCTATCTTTTCAAAACTAACTTCTAATTTTGTTGATTCTTTGTAATTATTTTCAGTC  
TCTTTCATTTAGATTTGCTC

In100 candidate1423 (in intron):

LOCUS ENSG00000152348

DESCRIPTION Autophagy-related protein 10 (APG10-like).

[Source:Uniprot/SWISPROT;Acc:Q9H0Y0]

TATTCAAAAATATATGTGTATTTAACTTTACACCCATTTATCAACTCTTTCTCAATTCCATTATACTCTTGAATCCAGTT  
CTTACCATTTTCCTTTTCTG

In100 candidate1424 (in intron):

LOCUS ENSG00000047849

DESCRIPTION Microtubule-associated protein 4 (MAP 4).

[Source:Uniprot/SWISSROT;Acc:P27816]

CCATTCTTGCCCATGGCCCTAACTTCTATTTTGCTTGCTGTGTGTCTTCCCCACTTTGTCTCTTTCTCTGTTTCCCAGCT  
TCATTTAATTACATCCTTCT

In100 candidate1425 (in intron):

LOCUS ENSG00000147650

DESCRIPTION Low-density lipoprotein receptor-related protein 12 precursor  
(uppressor of tumorigenicity protein 7). [Source:Uniprot/SWISSPROT;Acc:Q9Y56]

CGACTTGTTGGCTGATTTGGACACGCTTTTAGGGGAATGCTATTTTAAACAAGCTGTGTTCTCTTTTTTCTTGTAGCAGTA  
CTGACTTCCCTTTTGATTAT

In100 candidate1426 (in intron):

LOCUS ENSG00000139687

DESCRIPTION Retinoblastoma-associated protein (PP110) (P105-RB) (RB).  
[Soure:Uniprot/SWISSPROT;Acc:P06400]

AGTTCTGTATTTAAATGGATTCTAAGGTTATCATAACTCCTATATCATAGTTTCTCCATTTCTCAGTTCTTTATTTTAT  
TCATCTCTTAGCTGGCTGTA

In100 candidate1427 (in intron):

LOCUS ENSG00000169946

DESCRIPTION Zinc finger protein ZFPM2 (Zinc finger protein multitype 2)  
(Frend of GATA protein 2) (FOG-2) (hFOG-2). [Source:Uniprot/SWISSPROT;Acc:Q8WW8]

AGCTGTAATAACTGGTCCCTTGAGATTTTTTATCTACTTATTATTTACTTTACAGCTTGGGTATAGCTTTCAGCAAGTCT  
TTGCTCCATTTTTTTTCTTC

In100 candidate1428 (in intron):

LOCUS ENSG00000169946

DESCRIPTION Zinc finger protein ZFPM2 (Zinc finger protein multitype 2)  
(Friend of GATA protein 2) (FOG-2) (hFOG-2). [Source:Uniprot/SWISSPROT;Acc:Q8WW8]  
AGTAACCTCAAAATGTGATTTTCTTGCTCTCTGCAGAACTTTGTCTTACTTTTCATGTTTAATGTTGAGGCCTAGATTA  
TATTTTTCCCACTTTCTTTC

In100 candidate1429 (in intron):

LOCUS ENSG00000164830

DESCRIPTION Oxidation resistance protein 1.  
[Source:Uniprot/SWISSPROT;Acc:QN573]  
CACATATACTATCTCTCTCTCTCTTAGGTTTTTCAATTTTAACTTTGTGTGCTATTTTCATTTTAGCCATTGTTTCAGCC  
AGCACCTTCTTGTTTTTTG

In100 candidate1430 (in intron):

LOCUS ENSG00000161800

DESCRIPTION Rac GTPase-activating protein 1 (MgcRacGAP).  
[Source:Uniprot/SWSSPROT;Acc:Q9H0H5]  
TTGACTCCTTACTCTTGCCTTTCATCATTAACCTTCATTCCTCTTCTCTTTTTTGTATTCATTTTTTTTTTGAGACAGAA  
TTTTTCGCTCTTTGTTGCCC

In100 candidate1431 (in intron):

LOCUS ENSG00000152422

DESCRIPTION DNA-repair protein XRCC4 (X-ray repair cross-complementing protein

4). [Source:Uniprot/SWISSPROT;Acc:Q13426]

AGTGGGCAAAATATATATGAGAAAAAGTATGTGGTCGCTTATTTAACTTAAACATTTAGTTTCTTGAACCTCTCAGTCTT  
TACCTTTTTTTATATATATAT

In100 candidate1432 (in intron):

LOCUS ENSG00000055917

DESCRIPTION Pumilio homolog 2 (Pumilio-2).

[Source:Uniprot/SWISSPROT;Acc:Q8B72]

AGTCTCGTAACAAATTCGAATTTATTTGCCGAATCTTCCGTATTTCTTTTTTCAGCCTTAGTGTTGTTTTGTTTTGTTT  
TGTTTTGTTTTTTTTTGAGAT

In100 candidate1433 (in intron):

LOCUS ENSG00000055917

DESCRIPTION Pumilio homolog 2 (Pumilio-2).

[Source:Uniprot/SWISSPROT;Acc:Q8B72]

TTGTGATTAACATATCCTTCTCATCTTTTAATATGGTCCCTTTCATGAAGCTTTCCTCAATCTTCCCAGTGCTCATTCAT  
TGATAATTACTCCCTTGTCT

In100 candidate1434 (in intron):

LOCUS ENSG00000147655



DESCRIPTION R-spondin-2 precursor (Roof plate-specific spondin-2)

(hRspo2). [Source:Uniprot/SWISSPROT;Acc:Q6UXX9]

TTTGTTTAGACTTGGCCGGAGTTAATAACAAGCAAGAATTATCTTATTTTTGCTCATAAACATGTTTCCTTTCTTCAGAA  
TCCCTTTCCTCATCTTTTGT

In100 candidate1435 (in intron):

LOCUS ENSG00000164049

DESCRIPTION F-box/WD repeat protein 12 (F-box and WD-40 domain protein 12) Fbox  
only protein 35). [Source:Uniprot/SWISSPROT;Acc:Q6X9E4]

AAAGAATGTGTGTTCTTCTCTTGTGGGCACAATGTTTTATAAGTAACAATTAGATCACCTTGGTTGATCTTCTTCAGTT  
CTTTTCTATCCTTTCTGATT

In100 candidate1436 (in intron):

LOCUS ENSG00000145681

DESCRIPTION Hyaluronan and proteoglycan link protein 1 precursor (Proteoglycan  
link protein) (Cartilage link protein) (LP).

[Source:Uniprot/SWISSPROT;Ac:P10915]

GGTAACATCCTCTTTGTCATTTCTAATCATGTTTATTTGGATATTCTCTCTTTTCTTCTTTATTACCCTAGTTAGCAGTC  
TTTCGATCTTATTAATTTTT

In100 candidate1437 (in intron):

LOCUS ENSG00000138778

DESCRIPTION centromere protein E [Source:RefSeq\_peptide;Acc:NP\_001804]

TATTTGATTTTCTAACTTTTGATGTTACAACGTGTTTCCTTCAGTACTTTTACTATATCATTGCACTCCCTCCTGGCCTG  
TGAGATTCCTCTTTGTTGTT

In100 candidate1438 (in intron):

LOCUS ENSG00000205038

DESCRIPTION fibrocystin L [Source:RefSeq\_peptide;Acc:NP\_803875]

TGCTTTGAGACTTGTCAAGGTTTTAGGTTGTTTGTCTTAACACTGGCTCTGCATCTTCTCGTTATGTTTTTGCATCAGGT  
TTCTGTAGTCCTTGTCTCTG

In100 candidate1439 (in intron):

LOCUS ENSG00000133030

DESCRIPTION Myosin phosphatase Rho-interacting protein (Rho-interacting  
proein 3) (M-RIP) (RIP3) (p116Rip). [Source:Uniprot/SWISSPROT;Acc:Q6WCQ1]

CTGTGATGCTATCCCTGTTTTATTTCTGATAACAATTTGTGCCATTATGTCTTTTTTTTTCTTTTTTGGTCTTGTCAGCA  
GTGTTTTTTTTGTTTTGTTTT

In100 candidate1440 (in intron):

LOCUS ENSG00000118961

DESCRIPTION CDNA: FLJ21820 fis, clone HEP01232 (Chromosome 2 open reading  
fame 43). [Source:Uniprot/SPTREMBL;Acc:Q9H6V9]

TGAGTACTTTTTCATAATTTGAGTAACTTCTGAAATTTCTGCTCTTGTCTATTGCCCATCTTGATGTTTGGTTTCCAGCC  
TTTTTCTTACTGGTTTGTAG

In100 candidate1441 (in intron):

LOCUS ENSG00000147654

DESCRIPTION Receptor-binding cancer antigen expressed on SiSo cells (Cancer associated surface antigen RCAS1) (Estrogen receptor-binding fragment- associated gene 9 protein). [Source:Uniprot/SWISSPROT;Acc:000559]

ATTTAAATAACTCGAGTACAATTTTAAATATTCTGGTCTTTTTTTTTTTTTTTTTTTTTTTTTTTTAAACAGTCACT  
GTTCTTTTCATCCTGTCAAT

In100 candidate1442 (in intron):

LOCUS ENSG00000147654

DESCRIPTION Receptor-binding cancer antigen expressed on SiSo cells (Cancer associated surface antigen RCAS1) (Estrogen receptor-binding fragment- associated gene 9 protein). [Source:Uniprot/SWISSPROT;Acc:000559]

ACTTTTTTTTTTCTTAATAACTATTCTTTTCTCTCTGAATTACCTTTGCATCTTTATCAGATTTTCAGTTTTTGTATATACG  
TGGGTCTATTCCTTTACTTT

In100 candidate1443 (in intron):

LOCUS ENSG00000164053

DESCRIPTION ATR-interacting protein (ATM and Rad3-related-interacting proten). [Source:Uniprot/SWISSPROT;Acc:Q8WXE1]

TGGTTTGGCCCTTTCTCACTCTCTGGGTCCTGGCTGCACTAACATTCTTTGAATTCTCTCTGCTTCTTTACAATACAGGA  
ACTTTATACATTGTTCTTTC

In100 candidate1444 (in intron):

LOCUS ENSG00000066084

DESCRIPTION DIP2 disco-interacting protein 2 homolog B  
[Source:RefSeq\_peptie;Acc:NP\_775873]

TCTGGCTTCCTAACCTTCCTCGTGCTCTCTCTGGGGTTTCTTCTACTCTTTCTTTCTCCTGATGAGGGTATTCCTCAGAT

TTGTGTCTGTTCTTCACCTC

In100 candidate1445 (in intron):

LOCUS ENSG00000066084

DESCRIPTION DIP2 disco-interacting protein 2 homolog B

[Source:RefSeq\_peptie;Acc:NP\_775873]

AGTTTAACTCTTAATTTGCCACTGTTTGTTTCATTTATGTTATTTTACCTTCTCAGTTAGACTTCAGGTTTCTTTCTT  
TTTTTTTTTTTTTTTTTTGA

In100 candidate1446 (in intron):

LOCUS ENSG00000066084

DESCRIPTION DIP2 disco-interacting protein 2 homolog B

[Source:RefSeq\_peptie;Acc:NP\_775873]

TCTCATTTTGGCCAAAGAATATGACACAATAACTAAAACAAATTTCTAGTTGTTTCTTGTGTTGTTTATTCTGTTTCAGAG  
GTTTCTTTTCTTTTCTTTT

In100 candidate1447 (in intron):

LOCUS ENSG00000066084

DESCRIPTION DIP2 disco-interacting protein 2 homolog B

[Source:RefSeq\_peptie;Acc:NP\_775873]

AGTTTTCTGTTGTCCTTTAACATTTTAAAATATGCCTACATCTCTTTCATTTTATGTTTCTTCACAGACTCCTTTTGT  
TACCTCCCTCTCTGGTGTTT

In100 candidate1448 (in intron):

LOCUS ENSG00000066084

DESCRIPTION DIP2 disco-interacting protein 2 homolog B

[Source:RefSeq\_peptie;Acc:NP\_775873]

AAATTACACCAAGTAATGTGTGTTAACATTATGTGTCTGTGATATCTTCCCTTTTTTTCTTGACAATCAGTGCATTTT  
GGTGTCTTAATTTTCATCTC

In100 candidate1449 (in intron):

LOCUS ENSG00000084674

DESCRIPTION Apolipoprotein B-100 precursor (Apo B-100) [Contains:

Apolipoprotein B-48 (Apo B-48)]. [Source:Uniprot/SWISSPROT;Acc:P04114]

AGAGAGAATTTCTCTGACCACCAAGTATGAAATAACACTTCTTCTATCCCTTTCTTTTATCCTTGTATCCAGTTTTACTC  
TTCTTCATAACATTCATTAC

In100 candidate1450 (in intron):

LOCUS ENSG00000138777

DESCRIPTION Inorganic pyrophosphatase 2, mitochondrial precursor (EC 3.6.1.)

(PPase 2) (Pyrophosphatase SID6-306). [Source:Uniprot/SWISSPROT;Acc:Q9H2U]

TAGCCATGCACACTGTTTATCCAAAGTTCTTAACACACTGAGCTTTTCACCCTTTCTTATATATACCAGGTAGTTTTGCA  
CCTTAGTGGTTTTATCTTTT

In100 candidate1451 (in intron):

LOCUS ENSG00000138777

DESCRIPTION Inorganic pyrophosphatase 2, mitochondrial precursor (EC 3.6.1.)

(PPase 2) (Pyrophosphatase SID6-306). [Source:Uniprot/SWISSPROT;Acc:Q9H2U]

AGCCTATATGCATAACTGTAGATTTTTATGGTTTTTTTCCTCCTAATGTTTAACTGTTTTCTTACCCAGGCCTAATTTTT

TTTTTCTTTTTTGTTTTAT

In100 candidate1452 (in intron):

LOCUS ENSG00000148925

DESCRIPTION BTB/POZ domain-containing protein 10.

[Source:Uniprot/SWISSPROTAcc:Q9BSF8]

AGTATTTTCTTTCAACCCTTCTAGTAACTTTGTAAAAATTTCTGCTATTATTTTGCATTTCTCAGAACTTTTCTTATTC

TTTAATTTTTTTTAAAATTGC

In100 candidate1453 (in intron):

LOCUS ENSG00000148925

DESCRIPTION BTB/POZ domain-containing protein 10.

[Source:Uniprot/SWISSPROTAcc:Q9BSF8]

AGGAAACTGACGTGAGTACAATACTAATACTAAATTATTGACCTTTCTTGTATTTTATCAGTTTTTACATGCACTTTAT

CTTTTTTTTATTACATGGTT

In100 candidate1454 (in intron):

LOCUS ENSG00000102531

DESCRIPTION Fibronectin type-III domain-containing protein 3a.

[Source:Unipot/SWISSPROT;Acc:Q9Y2H6]

TGCCGTCTTTATTTTGGTACAAAAACCCTACTTAACTGAAGTGGAGTATTATCTTCCATTTTGTTCCTTTAACAACAGAA  
ATTGCCTGTTTCATCTTTTA

In100 candidate1455 (in intron):

LOCUS ENSG00000102531

DESCRIPTION Fibronectin type-III domain-containing protein 3a.

[Source:Unipot/SWISSPROT;Acc:Q9Y2H6]

TCACTCTTGCTTTTTTATTTTGTCCCTGTAACCTTTTGAAAATTTGCCTTTTGTATTTTTCATTGATTTTATATGCAGAG  
TTTAGTTTGATTTTCTCTA

In100 candidate1456 (in intron):

LOCUS ENSG00000164796

DESCRIPTION CUB and sushi domain-containing protein 3 precursor (CUB and suhi  
multiple domains protein 3). [Source:Uniprot/SWISSPROT;Acc:Q7Z407]

AACTATCTGGACGTTTTTACTTAAAAGTAAATATTTAACAATTTAATTTTTGTTTCCTTTGACTATAAATCTCTTCAGAT  
CTCTTCTTCAATTAATGCTG

In100 candidate1457 (in intron):

LOCUS ENSG00000164796

DESCRIPTION CUB and sushi domain-containing protein 3 precursor (CUB and suhi  
multiple domains protein 3). [Source:Uniprot/SWISSPROT;Acc:Q7Z407]

CTTGTCAAAAAGCACACTCAATGTAAATCCATATATTATTTAACTATGGGTTTTAATTTCTATTTACAGTACTATTTTCA  
AATTCTACACTTACTATTTTC

In100 candidate1458 (in intron):

LOCUS ENSG00000152268

DESCRIPTION Spondin-1 precursor (F-spondin) (Vascular smooth muscle cell

grwth- promoting factor). [Source:Uniprot/SWISSPROT;Acc:Q9HCB6]

TTAAGTCCAAGTCTGGTAACTATAATATCTAGATCATTTGTAGGTCTATTTCTATTATTTGTTTTCCCTTGCTTCAGTT  
TCTTGGTATGTCTCATCATT

In100 candidate1459 (in intron):

LOCUS ENSG00000133027

DESCRIPTION Phosphatidylethanolamine N-methyltransferase (EC 2.1.1.17) (PEAT)  
(PEMT) (PEMT2). [Source:Uniprot/SWISSPROT;Acc:Q9UBM1]

CTGAGAGGACCATGGAGGGCCCTAACAAGAACTGTGGATTTGTCTTTTCCACCCTTTAGTTCTGTCAGCTTTTGCTTCAT  
ACCTCACCTCACTTCTTTTT

In100 candidate1460 (in intron):

LOCUS ENSG00000119778

DESCRIPTION ATPase family AAA domain-containing protein 2B.  
[Source:Uniprot/SWISSPROT;Acc:Q9ULI0]

CCAAAAGGGATTTGTGTGGTAGGTAAAAGAATTTATAACTGCTTAAGACTGGTTTTTCTTAACTTTTACTTGCTGCAGTG  
TATTTTTTTGTCTCAATTAT

In100 candidate1461 (in intron):

LOCUS ENSG00000138780



DESCRIPTION glutathione S-transferase, C-terminal domain containing isoform1

[Source:RefSeq\_peptide;Acc:NP\_001026890]

ACTTTGTTTCCTACTTAACCCATTTATTCTTTGTTCTTTTTTCCTCTTTTTCTGCCTGCTTTGAGGCAGTTTGAGTATTT  
TTTATGATTCTGTCTTATCT

In100 candidate1462 (in intron):

LOCUS ENSG00000081189

DESCRIPTION Myocyte-specific enhancer factor 2C.

[Source:Uniprot/SWISSPROT;cc:Q06413]

ACCAAATTATTTTAACTACTCCTCACCATTTTATCACTACCAGCTTCTAGCTTATGCTAACACTACAGTTTCAGTCTC  
TCCGTCGGCATTTTTTTTTTT

In100 candidate1463 (in intron):

LOCUS ENSG00000129083

DESCRIPTION Coatomer subunit beta (Beta-coat protein) (Beta-COP).

[Source:Uiprot/SWISSPROT;Acc:P53618]

AGAAAATATATTTAACTTTATGTCTTATATTTTATATGTTAATTTTATTCTTGATTTTTTTCCCAGTTAATTTCTCTTTG  
CCCTGATCTCCTCATTTGTT

In100 candidate1464 (in intron):

LOCUS ENSG00000159579

DESCRIPTION RING finger and SPRY domain-containing protein 1 precursor.

[Sorce:Uniprot/SWISSPROT;Acc:Q96DX4]

AGGATGCATGTTGCCCTAACCTACTATTTAATGTCTTTCTATGTTATGCTTTTTTCTGTACTCAGTGACTTTTTTTTTTTT  
TTTTTTTTTGAGACCGAGAT

In100 candidate1465 (in intron):

LOCUS ENSG00000173960

DESCRIPTION UBX domain-containing protein 4.

[Source:Uniprot/SWISSPROT;Acc:68543]

GCCAATAACTTAAGAATTTGTTACGGTTTTCTGGTCACGTTTCTTTATGGGTCCCTCTGTTTCAGGATTTTGGCTTATAA  
ATCCCAGCTTCTTGTCTCTC

In100 candidate1466 (in intron):

LOCUS ENSG00000135457

DESCRIPTION Alpha-globin transcription factor CP2 (Transcription factor LSF  
(SAA3 enhancer factor). [Source:Uniprot/SWISSPROT;Acc:Q12800]

TATACCTCCATGCTGAGGTGTGGATTTCCATTTAGGGGTATACATTTTAAACATACACTCAACTTATCCTTTTAACAGGT  
ATGATTTCTATATCTTTTCT

In100 candidate1467 (in intron):

LOCUS ENSG00000145348

DESCRIPTION TBC domain-containing protein kinase-like protein.

[Source:Uniprot/SWISSPROT;Acc:Q8TEA7]

AAACTTAAGAGCCATTATTCACCTCATCCTTGACCTTTAACTCCTGTATATTTTCTCTTTCTGTATTTTCCTATACAGGCT  
CTCATACATCTATCTTTTCTT

In100 candidate1468 (in intron):

LOCUS ENSG00000113356

DESCRIPTION DNA-directed RNA polymerase III subunit G (EC 2.7.7.6) (DNA-directed RNA polymerase III 32 kDa polypeptide) (RNA polymerase III C32 subunit).

[Source:Uniprot/SWISSPROT;Acc:O15318]

AACAAGTTTAAAAAGAGTTACATATGTAACCTCTTTAAAAACCTCTCATTTTCTCCTGTTGGTTAATATGTACAGTT  
TTAATGCTTTTTTTTTTGGTC

In100 candidate1469 (in intron):

LOCUS ENSG00000152270

DESCRIPTION cGMP-inhibited 3',5'-cyclic phosphodiesterase B (EC 3.1.4.17) (cyclic GMP-inhibited phosphodiesterase B) (CGI-PDE B) (CGIPDE1) (CGIP1).

[Source:Uniprot/SWISSPROT;Acc:Q13370]

TTACGTTGAAGTATTCTTTTATCCCTGCCACAACCTTCATTAACCGCATACTCCTTATTATCTGTGTTTCCACCAGATTTC  
TTGTAATTTGCGTAATCCTC

In100 candidate1470 (in intron):

LOCUS ENSG00000152270

DESCRIPTION cGMP-inhibited 3',5'-cyclic phosphodiesterase B (EC 3.1.4.17) (cyclic GMP-inhibited phosphodiesterase B) (CGI-PDE B) (CGIPDE1) (CGIP1).

[Source:Uniprot/SWISSPROT;Acc:Q13370]

TTTAAATTACCTTACCATCTATTTAACCTAAAAATAAGCCACTTTTATTATTTCAGTTAACAACTGAATATCATTCTTTG  
TTTTTATTTTTATTTTTTTT

In100 candidate1471 (in intron):

LOCUS ENSG00000164199

DESCRIPTION G-protein coupled receptor 98 precursor (Monogenic audiogenic

sizure susceptibility protein 1 homolog) (Very large G-protein coupled receptor 1) (Usher syndrome type-2C protein). [Source:Uniprot/SWISSPROT;Acc:Q8WXG]  
CTTACACTCAATATTCTATAATCATGAATTATTTTCTAATCTAACTCCTAAATGTTTGTTTTCTAATCCAGTTTCTCAT  
TTCAACCATCATCTCTTATT

In100 candidate1472 (in intron):

LOCUS ENSG00000164199

DESCRIPTION G-protein coupled receptor 98 precursor (Monogenic audiogenic sizure susceptibility protein 1 homolog) (Very large G-protein coupled receptor 1) (Usher syndrome type-2C protein). [Source:Uniprot/SWISSPROT;Acc:Q8WXG]  
AACTCACCTCTACTTGAATATGCTCCACTTAACTCAAATTCAAAATTTCTTTTTTTTTCTTTTCCAGATAATTCTTTTTT  
TATTTTAAATTATACTTTAA

In100 candidate1473 (in intron):

LOCUS ENSG00000104447

DESCRIPTION Zinc finger transcription factor Trps1 (Zinc finger protein GC7) (Tricho-rhino-phalangeal syndrome type I protein).  
[Source:Uniprot/SWISSPOT;Acc:Q9UHF7]  
AATTTTATTGTATATTCAATTTGGAGATTAGGCTCTAACCTACCCTATATTTGGCTCTGTTTCAGGATATTTAAATTTCT  
TTCATTGTAATTTTGTTC

In100 candidate1474 (in intron):

LOCUS ENSG00000175662

DESCRIPTION TOM1-like protein 2 (Target of Myb-like protein 2).

[Source:Unirot/SWISSPROT;Acc:Q6ZVM7]

AGTGTCTAGTTGCAATAACTGTCTTATCTCTCTGGTTCTTGGTAAAACATTTCTTCTTTTATTCCATTTGGTTTTTCAGCC  
TTCTTGTTTTATTGTCTTG

In100 candidate1475 (in intron):

LOCUS ENSG00000160967

DESCRIPTION Protein CASP. [Source:Uniprot/SWISSPROT;Acc:Q13948]

TTTTTAACCTATATACAATTAATCTTTTTCTCTTCACCATTTAAGATTTTCCTTTTCTAATTTTGATTTTCAGAAACTCTC  
TTACGCTTACTGGTGTTCTT

In100 candidate1476 (in intron):

LOCUS ENSG00000160967

DESCRIPTION Protein CASP. [Source:Uniprot/SWISSPROT;Acc:Q13948]

TACTGATATAACTCTTAACTTAAATTTCTCTTTATTGTTGAATTGTTGATCCTTTTCTTTTTTCTAATTCACAGTATCTC  
TGTCTTAGGCTTTCTGATCT

In100 candidate1477 (in intron):

LOCUS ENSG00000164023

DESCRIPTION Phosphatidylcholine:ceramide cholinephosphotransferase 2 (EC  
2..8.27) (Sphingomyelin synthase 2). [Source:Uniprot/SWISSPROT;Acc:Q8NHU3]

AGTGTTATCTCATAAGCCTGGTGAGCCTAATTGAATAGCCACCCTTTAACGTCCCATCCTGCTTTGTCTTCGTAGCAGTT  
TTAATCTTTCATTATTATTG

In100 candidate1478 (in intron):

LOCUS ENSG00000113391

DESCRIPTION

TAAATAACCATAACAATTATTTGTCATTTTAATATTTTCACCTCTCACTGCCAATCTTTTTATGCTGTCACCTTCAGGCATA  
TATGCTTAATTTTACTTCCT

In100 candidate1479 (in intron):

LOCUS ENSG00000139629

DESCRIPTION Polypeptide N-acetylgalactosaminyltransferase 6 (EC 2.4.1.41)  
(rotein-UDP acetylgalactosaminyltransferase 6) (UDP- GalNAc:polypeptide  
Nactylgalactosaminyltransferase

6) (Polypeptide GalNAc transferase 6) (GalNAc-6)  
(pp-GaNTase 6). [Source:Uniprot/SWISSPROT;Acc:Q8NCL4]

TTGAGAAAAAAACACTTTGAAGTCCCCCATTAACCATCTCTAATCCTGTACCGTTTTCTTCATCTTCAGAAACTGGTTAT  
GTCATTTCTTTAGCTTTCTT

In100 candidate1480 (in intron):

LOCUS ENSG00000185261

DESCRIPTION

TCATCAAATATTTTTCATTTTAAAAATGCAAGTTTTGTGTATAATCACATAACAATGTATTCCTTTAAATTTTTCAGAT  
ATATAATTCTTTCCTTCTCT

In100 candidate1481 (in intron):

LOCUS ENSG00000141034

DESCRIPTION Uncharacterized protein C17orf39.

[Source:Uniprot/SWISSPROT;Acc:Q8IVV7]

TATGTCACGGTTTACCTATGTAAGTGTGGAGATTATTTTGTACCCAGGTATTAAGCCTAGTACTGAATAGTTATTT  
CTTCTGCTCCTCTCCCTTCT

In100 candidate1482 (in intron):

LOCUS ENSG00000110693

DESCRIPTION Transcription factor SOX-6. [Source:Uniprot/SWISSPROT;Acc:P3571]

CAAACCTTCATAAAAATGATGTCATACTGTAACTCTTGTGACTTGCTTTTTATTCTTATATTCTATCATCAGTTTTGCTG  
TGTGAACTTTCATTCATTTT

In100 candidate1483 (in intron):

LOCUS ENSG00000110693

DESCRIPTION Transcription factor SOX-6. [Source:Uniprot/SWISSPROT;Acc:P3571]

CTCCCACTCTGTGGGTTGTCTGTAACTCTGCTGATTATTTCTTTTGTGTCAGAAGCTTTTATAGTTTAATTAAGTCCC  
ATCTATTTATCTTTGCTTTT

In100 candidate1484 (in intron):

LOCUS ENSG00000182197

DESCRIPTION Exostosin-1 (EC 2.4.1.224) (EC 2.4.1.225) (Glucuronosyl-  
Nacetylglucosaminyl-  
proteoglycan/N-acetylglucosaminyl-proteoglycan 4- alpha-  
Nacetylglucosaminyltransferase)

(Putative tumor suppressor protein EXT1) (Multiple  
exostoses protein 1). [Source:Uniprot/SWISSPROT;Acc:Q16394]

GCATCGATTTTACATGAATATTTGGTATTCAAACCTAAAGGCTATTTAACTGGTTTCAACTGCCTTTTATTTTATCCAGCT

TAATTTTATCTTCCTTCTGA

In100 candidate1485 (in intron):

LOCUS ENSG00000198677

DESCRIPTION Tetratricopeptide repeat protein KIAA0372 (TPR repeat protein KAA0372). [Source:Uniprot/SWISSPROT;Acc:Q6PGP7]

AAATAAAATAAAATAGATGGGGTTCTATGCTTTTGCTATTTTATATATTAACAAATTAAAAATGTTTTTATTGTCAGAT  
TTTACATTTTATTGGCATT

In100 candidate1486 (in intron):

LOCUS ENSG00000177570

DESCRIPTION Sterile alpha motif domain-containing protein 12.  
[Source:Uniprt/SWISSPROT;Acc:Q8N8I0]

TAACCTATGCTCGTCTATCTTTATCACAGCTTACTGATTATCCACATGCATTACTTTTACTTGATTATTTTCATGACATT  
TTATTTATTTATTTTATTTT

In100 candidate1487 (in intron):

LOCUS ENSG00000188517

DESCRIPTION Collagen alpha-1(XXV) chain (CLAC-P) (Alzheimer disease amyloid associated protein) (AMY) [Contains: Collagen-like Alzheimer amyloid plaqu component (CLAC)]. [Source:Uniprot/SWISSPROT;Acc:Q9BXS0]

GTGTTTTGGGTTTTTCTTTCACATTAACATTTTTTGCCCTCATGTTTTCATCAGAATTTTTTATACATTAGTTATACAT  
ATATATTTATTTTCTCCT



In100 candidate1488 (in intron):

LOCUS ENSG00000188517

DESCRIPTION Collagen alpha-1(XXV) chain (CLAC-P) (Alzheimer disease amyloid associated protein) (AMY) [Contains: Collagen-like Alzheimer amyloid plaqu component (CLAC)]. [Source:Uniprot/SWISSPROT;Acc:Q9BXS0]

TTCTTGAAATTCTCTCCAATCTTGATTTCTGTAACCTAATTTTGTTGTCATTGTTTTTAGGTTTTTTTTATCCTCAGTT  
TCCATTTTGGAACACTTTTC

In100 candidate1489 (in intron):

LOCUS ENSG00000188517

DESCRIPTION Collagen alpha-1(XXV) chain (CLAC-P) (Alzheimer disease amyloid associated protein) (AMY) [Contains: Collagen-like Alzheimer amyloid plaqu component (CLAC)]. [Source:Uniprot/SWISSPROT;Acc:Q9BXS0]

ACAATAAATGTGTCCACTTATCTCTCTCTTCTACTAACCACCAAATTCAACTTACTTTTCATGTTCTTGATTACTTCAGTG  
GCTTTCCAATTAATCTTTCT

In100 candidate1490 (in intron):

LOCUS ENSG00000188517

DESCRIPTION Collagen alpha-1(XXV) chain (CLAC-P) (Alzheimer disease amyloid associated protein) (AMY) [Contains: Collagen-like Alzheimer amyloid plaqu component (CLAC)]. [Source:Uniprot/SWISSPROT;Acc:Q9BXS0]

GTATAGGTTCTTTGCTCCAACCTATCATTTTTAACTAGTAGAGCACTAAGTCGTTTTTTTTTTTTTAAATCTATTTTCAGCT  
CAGCCTATTTTTTGGCCTTT

In100 candidate1491 (in intron):

LOCUS ENSG00000188517

DESCRIPTION Collagen alpha-1(XXV) chain (CLAC-P) (Alzheimer disease amyloid associated protein) (AMY) [Contains: Collagen-like Alzheimer amyloid plaqu component (CLAC)]. [Source:Uniprot/SWISSPROT;Acc:Q9BXS0]

GCACATCTCATATATTTCTGTTATGTATATCTCTTTTAACCTTTCAATATTCATGTTGCTTTGCTTCAGACATTATTCAG  
TTTTATTGTAACCTCCCATCC

In100 candidate1492 (in intron):

LOCUS ENSG00000188211

DESCRIPTION

AGTTTGGGAAGTTTCTATTAACATCTTCAAGCTCACTGATTCTTTCCTTGTCAGTTTCTTTTTTTTTTTGAGACGGAGTT  
TTGCTCTTGTTGCCCAGTCT

In100 candidate1493 (in intron):

LOCUS ENSG00000177302

DESCRIPTION DNA topoisomerase 3-alpha (EC 5.99.1.2) (DNA topoisomerase III lpha). [Source:Uniprot/SWISSPROT;Acc:Q13472]

TAACTTCTTATCCTTCAAGGCTCTGCTGAATTCATTCTCTCTCTCCCTTTTTTTTTTTTTTTTTTTAAGCAATCCAGAG  
GTCTTGTATTTATCTATTTT

In100 candidate1494 (in intron):

LOCUS ENSG00000102753

DESCRIPTION Importin alpha-3 subunit (Karyopherin alpha-3 subunit) (SRP1-gama). [Source:Uniprot/SWISSPROT;Acc:000505]

AGTTCTTAATTTTGGTTATGTGTCTAACTTAATAATTATTTTTTCATATCTCAGAGTTCTGTTTGGTTCTTTTCATTTT  
CAGATCTGGTCATTTCTGAT

In100 candidate1495 (in intron):

LOCUS ENSG00000102753

DESCRIPTION Importin alpha-3 subunit (Karyopherin alpha-3 subunit) (SRP1-gama). [Source:Uniprot/SWISSPROT;Acc:000505]

GTCTGCAAAGTCTGTAGTGATAGTACCTTTTTTCATTTCTAATATTATAACTCTGCATTTTCTCTTTTTTTTTTGGCCAGTC  
TGCTGATTTTTTTTTTTTTTTT

In100 candidate1496 (in intron):

LOCUS ENSG00000102753

DESCRIPTION Importin alpha-3 subunit (Karyopherin alpha-3 subunit) (SRP1-gama). [Source:Uniprot/SWISSPROT;Acc:000505]

TTAACACACATATGCACATATTTTAATTCTTTTGGGAGCTTTTTTCTGTCCCTCTGATTATATCTCCTCTTGATACAGAT  
CTTAACATTTACTTTCCTAT

In100 candidate1497 (in intron):

LOCUS ENSG00000102753

DESCRIPTION Importin alpha-3 subunit (Karyopherin alpha-3 subunit) (SRP1-gama). [Source:Uniprot/SWISSPROT;Acc:000505]

GGGATTTAACTTTGTAAAGTATCCTTTTTTCTTTGTAATTCTTTTTAGATTAAATTCTACTGGTCGTCTTTTAACAGGGT  
TACAACCTCAGCTTTCCTTT

In100 candidate1498 (in intron):

LOCUS ENSG00000064313

DESCRIPTION Transcription initiation factor TFIID subunit 2 (Transcription initiation factor TFIID 150 kDa subunit) (TBP-associated factor 150 kDa) (TAII-150) (TAFII150) (150 kDa cofactor of initiator function).

[Source:Unipro/SWISSPROT;Acc:Q6P1X5]

AGTTGAGGTGTTTAGGAAATTTCCAATATTAAATTTAACTCTTTCATTTAGATGATCTTCCTTGCTTCTTCTTTTCAGGT  
TACTCATTTTTGTTTGCCCC

In100 candidate1499 (in intron):

LOCUS ENSG00000161040

DESCRIPTION F-box/LRR-repeat protein 13 (F-box and leucine-rich repeat protein 13). [Source:Uniprot/SWISSPROT;Acc:Q8NEE6]

CACCCACTGAGTTTTAAATTTCAATAACTATATTTTAAATTTTCATGATTTTATTTGGTTCTTTTACAGATCTTCCCAGT  
CCTGTTTTGACAACATTTGT

In100 candidate1500 (in intron):

LOCUS ENSG00000161040

DESCRIPTION F-box/LRR-repeat protein 13 (F-box and leucine-rich repeat protein 13). [Source:Uniprot/SWISSPROT;Acc:Q8NEE6]

ATAACTTGATAAGTATTGTTTTAACTTTCTAAACCAACTATTCTATATTTGCTTTCCTCTTTCACTCAGTAATGTTTATT  
TATTTATTTATTTAATTTTT

In100 candidate1501 (in intron):

LOCUS ENSG00000161040

DESCRIPTION F-box/LRR-repeat protein 13 (F-box and leucine-rich repeat protein 13). [Source:Uniprot/SWISSPROT;Acc:Q8NEE6]

TCAATATTGTAATTATATTTATAATGAGTATGTAGTCTTAACCTCTAGGCCATTCATTGATGGTCTTTTTTTCTCACAGCT  
TACTTATTCTTTAGCCTTTT

In100 candidate1502 (in intron):

LOCUS ENSG00000164292

DESCRIPTION Rho-related BTB domain-containing protein 3.  
[Source:Uniprot/SWISSPROT;Acc:O94955]

TTCTTTAAGATCCTAGTGTTTGCTGCATCTGGAGCTAACCCCTTAAAATTATTTTATCTCTAGCTTATTTTATCCAGCT  
CTCTTCCTTTTTTATTTGAGC

In100 candidate1503 (in intron):

LOCUS ENSG00000138092

DESCRIPTION Centromere protein O (CENP-O) (Interphase centromere complex protein 36). [Source:Uniprot/SWISSPROT;Acc:Q9BU64]

TTAAACTTTATTCTTATTGCCCTTGTTTCTTGTTTAATAAATCTTTGTCTAACTTAAGATCATGCTGATCTTTTCCAGGT  
ATTTTATTTTTTTTTATTTTT

In100 candidate1504 (in intron):

LOCUS ENSG00000155792

DESCRIPTION DEP domain containing 6 [Source:RefSeq\_peptide;Acc:NP\_073620]

GCCTGGGTCTTATTCTGCCTCCACCATTTATTCTGTAACCTTAGGACAATATGTTTAGCCTCTCTGTGTCTCAGTTTCC  
TCTTCTACGAAATGTTATTC

In100 candidate1505 (in intron):

LOCUS ENSG00000187955

DESCRIPTION Collagen alpha-1(XIV) chain precursor (Undulin).

[Source:Unipro/SWISSPROT;Acc:Q05707]

AATTTTTTCAAAAACTAACTAACTACTGGATTCGTTGTCTTTTGAATATTTTTTCATGTCTTGATTCCTTCAGTTCAG  
CCCTGATCTTGGTTATTTCT

In100 candidate1506 (in intron):

LOCUS ENSG00000118985

DESCRIPTION RNA polymerase II elongation factor ELL2.

[Source:Uniprot/SWISSROT;Acc:O00472]

TCATATCATGTATTATTCTAAGCATATTATTGGCTTTTAACAAGAGCTGAGTGTATTTTATTTCTTCAGGATCAACTGTC  
TGATTTCTTGTGCTATTTTC

In100 candidate1507 (in intron):

LOCUS ENSG00000198218

DESCRIPTION Glutamine-rich protein 1.

[Source:Uniprot/SWISSPROT;Acc:Q2TAL8]EXON

AAGGCTTAAAGAATGGATTTTGATGGTTTATAGCAAGTAACTTTTGAAGCTTTTATTTTTTCTGACAGCTGAATATCTA  
GCTTATTTGCCTTTTGTCTC

In100 candidate1508 (in intron):

LOCUS ENSG00000198218

DESCRIPTION Glutamine-rich protein 1.

[Source:Uniprot/SWISSPROT;Acc:Q2TAL8]EXON

TTATATAAATTAAAAAAATTGAAGGGAAGTAATATAAATAACATTTAATTTCTTTTTTGTTTTTTTTTCGAGACAGAGT  
TTTGCTCTTTCACCTAGGCT

In100 candidate1509 (in intron):

LOCUS ENSG00000172167

DESCRIPTION Mdm2, transformed 3T3 cell double minute 2, p53 binding  
proteinbinding protein [Source:RefSeq\_peptide;Acc:NP\_071328]

AAGATGAGTAATTAACACCCTTATTTTTCTTCCCTTTTTATCTTCTATCTCTAAACCTTATGCTATTTGCAGTATACAAG  
TCTTAATTTTATTTTTCTTC

In100 candidate1510 (in intron):

LOCUS ENSG00000172164

DESCRIPTION Beta-1-syntrophin (59 kDa dystrophin-associated protein A1 basi  
component 1) (DAPA1B) (Tax interaction protein 43) (TIP-43) (Syntrophin  
2)(BSYN2). [Source:Uniprot/SWISSPROT;Acc:Q13884]

TTAAAATTATTTTAAAGAATTTCCCATTCCTTTAAGAGTTACAAGACTAACCATGCTCTCTATTTTCTTAGGTCAGTT  
TTGTTAAGTTTATTTTTTTC

In100 candidate1511 (in intron):

LOCUS ENSG00000172164

DESCRIPTION Beta-1-syntrophin (59 kDa dystrophin-associated protein A1 basi  
component 1) (DAPA1B) (Tax interaction protein 43) (TIP-43) (Syntrophin

2)(BSYN2). [Source:Uniprot/SWISSPROT;Acc:Q13884]

AAATATGGGTTTAAATCCCAAGTCTGTTACTTATTCCCTTTAACTTTAAGTAAATTATCCAATCTCTCTGATTTTCAGGT  
TCCTTCTTTGCTATAGTCTT

In100 candidate1512 (in intron):

LOCUS ENSG00000153113

DESCRIPTION Calpastatin (Calpain inhibitor) (Sperm BS-17 component).

[Source:Uniprot/SWISSPROT;Acc:P20810]

AAGTGGCCTGGCTCCAAAGCCATTCTTCTAACCATGACACAACTTTTTTCTTTTCTTTTCTTTTTTGAACAGGCTCTT  
GGGGTCTTGCTCTGTCACTT

In100 candidate1513 (in intron):

LOCUS ENSG00000141127

DESCRIPTION Phosphoribosyl pyrophosphate synthetase-associated protein 2 (PPP  
synthetase-associated protein 2) (41 kDa phosphoribosypyrophosphate  
syntetaseassociated

protein) (PAP41). [Source:Uniprot/SWISSPROT;Acc:O60256]

ATTAGTATATCTTACCAATTTAGAATTTAGAAAATAAGTTTTCTGACATAACTGCTGACTTTTACATGTTCTTTCAGTG  
TTTTTCCTTCTTTCTTTCTT

In100 candidate1514 (in intron):

LOCUS ENSG00000129158



DESCRIPTION Secretion-regulating guanine nucleotide exchange factor (Guanin nucleotide exchange factor-related protein) (Deafness locus-associated putative guanine nucleotide exchange factor) (DelGEF).

[Source:Uniprot/SWISSPRO;Acc:Q9UGK8]

ACCTGTGTATACTCTCTAGTTGTCTAATCTCAAAGTAACCTGTTTTATCCATCTATATCTTTCTAATCCATTTATCAGTC  
TCCATTTGTGTATCTATCTA

In100 candidate1515 (in intron):

LOCUS ENSG00000129158

DESCRIPTION Secretion-regulating guanine nucleotide exchange factor (Guanin nucleotide exchange factor-related protein) (Deafness locus-associated putative guanine nucleotide exchange factor) (DelGEF).

[Source:Uniprot/SWISSPRO;Acc:Q9UGK8]

GAGCTTATTACTGAAAGATGTCCTGCTGCAAGTCCTTCTGTTAAGGGGATAACCAATCCTTTGCTTTTCTGAGTTCAGCA  
TCCTGGCTTTTTTTTTTCCTA

In100 candidate1516 (in intron):

LOCUS ENSG00000138660

DESCRIPTION Uncharacterized protein C4orf16.

[Source:Uniprot/SWISSPROT;Acc:63HQ0]

ATTCTTCTGTTTCTTCATTTTACACATCTTTTTTAAAAATATGATTAACTTCCTTCTCTTTCTTTTAAATCTTACAGGAG  
CCCTTCTGTTTCCTTAAGTT

In100 candidate1517 (in intron):

LOCUS ENSG00000125107

DESCRIPTION CCR4-NOT transcription complex, subunit 1 isoform a

[Source:Refeq\_peptide;Acc:NP\_057368]

CTGGCCGAAATATGTATTCTTAACCTGTGTTTTGTTTTTGCTGTTTGTTTTACAGTTTCTTAAAATAGGTTCCATCCTGA  
TTCTTTGTGTTTTTACTTTT

In100 candidate1518 (in intron):

LOCUS ENSG00000125107

DESCRIPTION CCR4-NOT transcription complex, subunit 1 isoform a

[Source:Refeq\_peptide;Acc:NP\_057368]

CTAATAACTAACTTGGGCCCTGATTTTCTCCCTTTTCAGTACTTTAAAAAATTATTATATGCTTTTACTCTACTTTCTT  
TGGTTTTTCATTAGTTCTTTT

In100 candidate1519 (in intron):

LOCUS ENSG00000073331

DESCRIPTION Alpha-protein kinase 1 (EC 2.7.11.-) (Lymphocyte alpha-protein  
inase) (Chromosome 4 kinase). [Source:Uniprot/SWISSPROT;Acc:Q96QP1]

ATTATATACTAATTTATTAATTATTGACATTTGGTATAACACTGTGCTCTCCTCATTATTTTTCATCAGGAATGTCTTTA  
TTATTCTTGAAGTGTTC

In100 candidate1520 (in intron):

LOCUS ENSG00000166788

DESCRIPTION Protein SAAL1. [Source:Uniprot/SWISSPROT;Acc:Q96ER3]

ATCAAGTGGCATGGCTGGATCATACGGTAGGTGTATGCTTAACTTTTTTAAGAACTTTCAATTTGTTTTCCCTAAGCAGTT  
TTTTACCATTTTACATAACC

In100 candidate1521 (in intron):

LOCUS ENSG00000166788

DESCRIPTION Protein SAAL1. [Source:Uniprot/SWISSPROT;Acc:Q96ER3]

AAAAACAAAAAATTTCTGACATTTTGTGACATCGTGTTAACTTGATAGGATATGTTATGCCCTTTTATTTGTTTCAGGT  
CTTTTTTGTGTCCCTCAGTA

In100 candidate1522 (in intron):

LOCUS ENSG00000189056

DESCRIPTION Reelin precursor (EC 3.4.21.-).

[Source:Uniprot/SWISSPROT;Acc:P8509]

GATTTGCTTAATGTGACTTAAGTTTTATAACTGTGTTGTGACTCTTTATTACTGGATTTTGCTTTCATTCCTGATCAGTT  
GTCTTTCTTCTTTCCTCTCT

In100 candidate1523 (in intron):

LOCUS ENSG00000072134

DESCRIPTION Epsin-2 (EPS-15-interacting protein 2).

[Source:Uniprot/SWISSPRT;Acc:O95208]

AGAGCACATTTTTATGGAATACTTCTTGCCTCCTGGGGCATAACCCTAGCCTTGGAATTTTTTTTTTCCAGTTTTGTTCT  
GTTTGCTGTTTTGTTTAGTC

In100 candidate1524 (in intron):

LOCUS ENSG00000102786

DESCRIPTION Integrator complex subunit 6 (Int6) (Protein deleted in cancer )  
(Protein DDX26) (DBI-1) (Deleted in cancer 1) (DICE1).

[Source:Uniprot/SWSSPROT;Acc:Q9UL03]

TGCTAATGATAGGAATTCTTGCAACTAACTAGTTTACTATATTCTTCTTCTTCTTCTTCTTTTTTTTAATCTCAGGC  
CGTTCATATTCTGTGTGTTC

In100 candidate1525 (in intron):

LOCUS ENSG00000139668

DESCRIPTION WD repeat and FYVE domain-containing protein 2 (WD40- and FYVE  
omain- containing protein 2) (Zinc finger FYVE domain-containing protein 22.

[Source:Uniprot/SWISSPROT;Acc:Q96P53]

AACATTTTTTAATATCTGGTAGGGCTAACCTCCCTATCACATACCATATTGTTCTTATTTTCAGAGTATTCTTGGCTCTT  
TTTGCTTATTTATTTTCCA

In100 candidate1526 (in intron):

LOCUS ENSG00000138101

DESCRIPTION Dystrobrevin beta (Beta-dystrobrevin) (DTN-B).

[Source:Uniprot/WISSPROT;Acc:O60941]

AGAGAGCATGGTTCATATGATTTTAATCCTTTAACATTTATTGAGATTGCTTTATGGCTCAGGATATGGTCAATTTCTT  
TTTTTTTTTTTTTTTTTTTG

In100 candidate1527 (in intron):

LOCUS ENSG00000145362

DESCRIPTION Ankyrin-2 (Brain ankyrin) (Ankyrin-B) (Ankyrin, nonerythroid).

Source:Uniprot/SWISSPROT;Acc:Q01484]

TAAAATGTAAATATAATAGTGATTCCTATGTCATTAAACATTTCTTATTCTTTCATTCATCAAATATTTATTTCTCAGCA  
CTCATAACCTCTTCATTTTT

In100 candidate1528 (in intron):

LOCUS ENSG00000125166

DESCRIPTION Aspartate aminotransferase, mitochondrial precursor (EC 2.6.1.1  
(Transaminase A) (Glutamate oxaloacetate transaminase 2).

[Source:Uniprot/WISSPROT;Acc:P00505]

AGAAAGTTTGTGAAAGGGAAAAAATTAACCATAACTCTAGCTATTCTAACTCAGCTTTTTTTTTTCCCTTACCCATTGTTT  
GTTTGTTTTTTTCTTTATTTG

In100 candidate1529 (in intron):

LOCUS ENSG00000187416

DESCRIPTION Lipoma HMGIC fusion partner-like 3 protein.

[Source:Uniprot/SWISPROT;Acc:Q86UP9]

ATTTCTTCCTTTGCTTTCTTTAAGTTTATTTAGTTGTTTTTCCCTAACTTCATCTGGGATGCTTTATTTATTTTTCAGTC  
TTTCTTATTCATTGCTATAA

In100 candidate1530 (in intron):

LOCUS ENSG00000187416

DESCRIPTION Lipoma HMGIC fusion partner-like 3 protein.

[Source:Uniprot/SWISPROT;Acc:Q86UP9]

TTATTTTATTTTAGGTTTACTGTTTAACATACTTCATTTTTTTCTTCTTCTCCTTAATTTTCTGGCTTGGTCAGCT  
CTCTCTTCTTTGCATTTTTG

In100 candidate1531 (in intron):

LOCUS ENSG00000150394

DESCRIPTION Cadherin-8 precursor. [Source:Uniprot/SWISSPROT;Acc:P55286]

TTCAGTGGAGCTCTGCTCATTTTCTTTATTTTTTTTAACTGCTGTTCTTTGATTCTCTACTGATCTTCACTTTCAGTA  
ATTCTTTCTTCTGCCAATTT

In100 candidate1532 (in intron):

LOCUS ENSG00000173402

DESCRIPTION Dystroglycan precursor (Dystrophin-associated glycoprotein 1)

[ontains: Alpha-dystroglycan (Alpha-DG); Beta-dystroglycan (Beta- DG)].

[Souce:Uniprot/SWISSPROT;Acc:Q14118]

TTCTTGAGATCAATTTTATTAATCTTTTCAAATAACTAGTTATTTGTTTCAATGGTTTTTCTCTGTTTTTGTTTTCAGTT  
TCATTGGGGTTTTTTTGCTTT

In100 candidate1533 (in intron):

LOCUS ENSG00000181171

DESCRIPTION Putative uncharacterized protein C8orf54.

[Source:Uniprot/SWISSROT;Acc:Q8NA97]

AGCACTATGCTGGTACACTAACACTACTAGCATTTTTCTTGTTTCCTACAGAGTCTCTGTAGTAAGTCTTCCTTTGCTTT  
TTCCTACCTTTGATTTATGT

In100 candidate1534 (in intron):

LOCUS ENSG00000084733

DESCRIPTION Ras-related protein Rab-10. [Source:Uniprot/SWISSPROT;Acc:P6102]

ACTGTGCCCCGGCTAAATCTGATACCTCTTTGCTTAGAGCTTCAACTCCTAACTTAGATTGTTTTGTTTACCCTGCAGCA  
ATTCATCTTTGCTCTCTTTT

In100 candidate1535 (in intron):

LOCUS ENSG00000145349

DESCRIPTION Calcium/calmodulin-dependent protein kinase type II delta  
chain(EC 2.7.11.17) (CaM-kinase II delta chain) (CaM kinase II subunit delta)  
(CMK-II subunit delta). [Source:Uniprot/SWISSPROT;Acc:Q13557]

CATTCCTCAAGTTTTTATGAAATAAATTAAGTGCATTTTTTGTGTTCTTTTGTCTTTAGCAGATGATTTTAACCATA  
AATTTTGCCTTTTTATCCTT

In100 candidate1536 (in intron):

LOCUS ENSG00000145349

DESCRIPTION Calcium/calmodulin-dependent protein kinase type II delta  
chain(EC 2.7.11.17) (CaM-kinase II delta chain) (CaM kinase II subunit delta)  
(CMK-II subunit delta). [Source:Uniprot/SWISSPROT;Acc:Q13557]

AATTGATATGACTATGTTATATTCTAGTGCTTTTAACACACCTTCATCATCATCCTTAGTCTTTCTTTGTCTCCTCAGTT  
TCTTTTAATTTCTTTGTCTC

In100 candidate1537 (in intron):

LOCUS ENSG00000074319

DESCRIPTION Tumor susceptibility gene 101 protein.

[Source:Uniprot/SWISSPRO;Acc:Q99816]

GATGTCTTCATTCTTCTCTGAATAACTCCTTGAAGTAACTCTCTTTGTTATCTTCAGTACCTCTTCTCCGTTTTTCTCTT  
AAACCTCCTTTTGGACTTTT

In100 candidate1538 (in intron):

LOCUS ENSG00000136098

DESCRIPTION Serine/threonine-protein kinase Nek3 (EC 2.7.11.1) (NimA-relate  
protein kinase 3) (HSPK 36). [Source:Uniprot/SWISSPROT;Acc:P51956]

CATTCTTGATAATATAGAATATGTAACATATACATATTATTTTTTTAACTCAGTCACTGTAATGGTTCGTTTTAATT  
TTCATTTTGGATTTTTTTTTT

In100 candidate1539 (in intron):

LOCUS ENSG00000083290

DESCRIPTION Serine/threonine-protein kinase ULK2 (EC 2.7.11.1) (Unc-51-  
likekinase 2). [Source:Uniprot/SWISSPROT;Acc:Q8IYT8]

TAATAACTCTTTTCCACTAATCTTTTTATCAGTGTAGTACCCTTGCTTTTAATTTTTCCTGCTGTTCTGCAGTTCAGAGA  
CCCTCTGTTTTACTCTGTCC

In100 candidate1540 (in intron):

LOCUS ENSG00000083290

DESCRIPTION Serine/threonine-protein kinase ULK2 (EC 2.7.11.1) (Unc-51-  
likekinase 2). [Source:Uniprot/SWISSPROT;Acc:Q8IYT8]



GGTCATTGTTTAGTCTTTTCTACTTAAGGCCAATAACCCTTAGTTTTTGTTTTTTTTTTTTTTGGCAGCTTTTTTTTAGA  
TTTGTAGGCTTGCTTCATTC

In100 candidate1541 (in intron):

LOCUS ENSG00000146776

DESCRIPTION Ataxin-7-like protein 4. [Source:Uniprot/SWISSPROT;Acc:Q8N2T0]

EXON

AGGTAATAACATCCTAATATCTTTGAAGATAAGTTTTTTAGTTTTTTCTCTTCCATCATCGTCTTAGTTTTTTCCAGGT  
TTGTTTCCTTCCTCTGTTCA

In100 candidate1542 (in intron):

LOCUS ENSG00000180801

DESCRIPTION arylsulfatase family, member J (ARSJ), mRNA

[Source:RefSeq\_dna;cc:NM\_024590]

TCTCCCTTCCCACCTAATTTAATGTAAGTGCCTTCTGTCACTCTCTTGATTAGCTTATTTTGCTTTTTTCCCATAGCAGTT  
ATCACTACCTGAATTTTCTT

In100 candidate1543 (in intron):

LOCUS ENSG00000197585

DESCRIPTION

TTTTTTGTAAAGTAACTGTAAAGTTTTCTTACCCATTTTTCTCCTGGATTATTTGTCTTTTTTTCTCTTGATTGTCAGTT  
TTTTATATATTCTGATTTCC

In100 candidate1544 (in intron):

LOCUS ENSG00000128487

DESCRIPTION Sperm antigen with calponin homology and coiled-coil domains 1  
Nuclear structure protein 5) (NSP5) (Sperm antigen HCMOGT-1).

[Source:Uniprt/SWISSPROT;Acc:Q5M775]

CTTCCCGTAGTGCTGCTATTTGGTTGTGCATTCTGTCTGCTGAGACTGTAACCTCAATACACATCACATATTTTCCAGAT  
CATCCTGTTCTTTATCTCAG

In100 candidate1545 (in intron):

LOCUS ENSG00000128487

DESCRIPTION Sperm antigen with calponin homology and coiled-coil domains 1  
Nuclear structure protein 5) (NSP5) (Sperm antigen HCMOGT-1).

[Source:Uniprt/SWISSPROT;Acc:Q5M775]

AGGAAATGAATTAACAATTTGTACAAGAACTTTTCTGTTCTTCCTTCTCTAGGCATCTCATTATTTATACAGTTTCTTT  
TTGCTCAGCTATCCTTCATC

In100 candidate1546 (in intron):

LOCUS ENSG00000008282

DESCRIPTION Synaptophysin-like protein 1 (Pantophysin).

[Source:Uniprot/SWISPROT;Acc:Q16563]

GTATTACCTGTAACCAAGATCATGATTTTATTCATCTCTGAGACTTTCTTTCATCTAGTCAGATTTATATCTGGGAAGAT  
TAATTTCTTTTTTTTTTTTTT

In100 candidate1547 (in intron):

LOCUS ENSG00000138653

DESCRIPTION Bifunctional heparan sulfate N-deacetylase/N-sulfotransferase  
4(EC 2.8.2.8) (Glucosaminyl N-deacetylase/N-sulfotransferase 4) (NDST- 4)  
(Nheparan sulfate sulfotransferase 4) (N-HSST 4) [Includes: Heparan sulfate  
Ndeacetylase 4 (EC 3.-.-.-); Heparan sul [Source:Uniprot/SWISSPROT;Acc:Q9H3R]  
GTTTTGTATTCCTATTA ACTCTTTCAATTCCTTTTCTTTTCTTCAA ACTATTCTCAGCTTCTTCACCACCACTTTGTTT  
TCAACTCACTTTTAACATTTT

In100 candidate1548 (in intron):

LOCUS ENSG00000138653

DESCRIPTION Bifunctional heparan sulfate N-deacetylase/N-sulfotransferase  
4(EC 2.8.2.8) (Glucosaminyl N-deacetylase/N-sulfotransferase 4) (NDST- 4)  
(Nheparan sulfate sulfotransferase 4) (N-HSST 4) [Includes: Heparan sulfate  
Ndeacetylase 4 (EC 3.-.-.-); Heparan sul [Source:Uniprot/SWISSPROT;Acc:Q9H3R]  
CATGTAATTGTACTGAAGATTAAAATATTTAATAACTTCATTAATAATTTTCTTTTATTTTTTTTAACATCTGAAGCAGAT  
GTAGTTTACTTTCTCTTTTTT

In100 candidate1549 (in intron):

LOCUS ENSG00000138653

DESCRIPTION Bifunctional heparan sulfate N-deacetylase/N-sulfotransferase  
4(EC 2.8.2.8) (Glucosaminyl N-deacetylase/N-sulfotransferase 4) (NDST- 4)  
(Nheparan sulfate sulfotransferase 4) (N-HSST 4) [Includes: Heparan sulfate  
Ndeacetylase 4 (EC 3.-.-.-); Heparan sul [Source:Uniprot/SWISSPROT;Acc:Q9H3R]  
AGCAAAAATATGCTAAAATAATATTTTGTCTCTTATTGCCATATAACCTTTTACTTTCTTTTTTTTGTAACAGGAACA ACT  
GCACTTTATTTATTTCTTCT

In100 candidate1550 (in intron):

LOCUS ENSG00000164961

DESCRIPTION Uncharacterized protein KIAA0196.

[Source:Uniprot/SWISSPROT;AccQ12768]

TGAGGCTTGAAAAGATTACATCACTGCCCTATATTAACCTCTGTATAAATTCATTTACTCACTAATGTTTATCTCCAGGG  
TTTTTCTTCCTTTAGGGCTC

In100 candidate1551 (in intron):

LOCUS ENSG00000113532

DESCRIPTION CMP-N-acetylneuraminate-poly-alpha-2,8-sialyltransferase (EC  
2..99.-) (Alpha-2,8-sialyltransferase 8D) (ST8Sia IV) (Polysialyltransferase-1).

[Source:Uniprot/SWISSPROT;Acc:Q92187]

AGTCCCATGTACCGCTTTGTCTCATACATCCTGATAACAAGCCTGATTCATTCATCCTACTTTCTGGTTTTATCCAGCTC  
TCTAACCATTTGTTTTACTA

In100 candidate1552 (in intron):

LOCUS ENSG00000164100

DESCRIPTION Bifunctional heparan sulfate N-deacetylase/N-sulfotransferase  
3(EC 2.8.2.8) (Glucosaminyl N-deacetylase/N-sulfotransferase 3) (NDST- 3) (hDST-  
3) (N-heparan sulfate sulfotransferase 3) (N-HSST 3) [Includes: Heparansulfate  
N-deacetylase 3 (EC 3.-.-.-); H [Source:Uniprot/SWISSPROT;Acc:09580]

CTTATTTATTTTTTCAAAAACTAACTTCTGGTTTTGTTGATCTCTTACATGCTTTTTTATGTCTCAATTTTATTCAGTT  
CATTTTTTCACATCTCAGTT

In100 candidate1553 (in intron):

LOCUS ENSG00000164100

DESCRIPTION Bifunctional heparan sulfate N-deacetylase/N-sulfotransferase  
3(EC 2.8.2.8) (Glucosaminyl N-deacetylase/N-sulfotransferase 3) (NDST- 3) (hDST-  
3) (N-heparan sulfate sulfotransferase 3) (N-HSST 3) [Includes: Heparansulfate  
N-deacetylase 3 (EC 3.-.-.-); H [Source:Uniprot/SWISSPROT;Acc:09580]  
GAGTGCTAACCTTGGCTCCGCTTTGGCATTTCCTGTGTCTCCCACTCCATGTTCCCATGCATTTAACAATTTCTTTCAGTT  
TTTTCTTTCTTTTGTACCAG

In100 candidate1554 (in intron):

LOCUS ENSG00000164100

DESCRIPTION Bifunctional heparan sulfate N-deacetylase/N-sulfotransferase  
3(EC 2.8.2.8) (Glucosaminyl N-deacetylase/N-sulfotransferase 3) (NDST- 3) (hDST-  
3) (N-heparan sulfate sulfotransferase 3) (N-HSST 3) [Includes: Heparansulfate  
N-deacetylase 3 (EC 3.-.-.-); H [Source:Uniprot/SWISSPROT;Acc:09580]  
AAACTCCCTTTAACTGTAAAGCCATTAATTTTTCTTCTGATTTCTTCTTTTCTCTTTCCACCTTTGTCTTGCCCAGTT  
TTTACTTATTTTCATTCCTC

In100 candidate1555 (in intron):

LOCUS ENSG00000156831

DESCRIPTION E3 SUMO-protein ligase NSE2 (EC 6.-.-.-) (Non-structural  
maintenance of chromosomes element 2 homolog) (Non-SMC element 2 homolog)  
(hMMS21) [Source:Uniprot/SWISSPROT;Acc:Q96MF7]  
AGAGGTAACCTTTTCTCCTTCTATTCTGCCTTTCTGAATTCTTTTTCTGCATCACCTGTTCTTCAATCTTCCTGCAGCCCT  
TTAACTCTTCTTATTTTTGT

In100 candidate1556 (in intron):

LOCUS ENSG00000164099

DESCRIPTION Neurotrypsin precursor (EC 3.4.21.-) (Serine protease 12)  
(Motosin) (Leydin). [Source:Uniprot/SWISSPROT;Acc:P56730]

AGGATTCTAAATTTTAAAATGTTAACTCCATGAAAATATTTTGCTTAAGCCATCTTCTTTTCCTCAGCTTCCTCTATACC  
TCCTATAATATTCTTTTATC

In100 candidate1557 (in intron):

LOCUS ENSG00000205359

DESCRIPTION solute carrier organic anion transporter family, member 6A1  
[Source:RefSeq\_peptide;Acc:NP\_775759]

TGTTTTTTTATAACGACTGCACCATTTTACATTCCTGCAGTGCACAGGGTTCCAATTTCTCCACATCCTCACCAATACTGT  
TTTGTTTGTTTTTTCTGTTT

In100 candidate1558 (in intron):

LOCUS ENSG00000164597

DESCRIPTION Conserved oligomeric Golgi complex component 5 (13S Golgi  
transort complex 90 kDa subunit) (GTC-90) (Golgi transport complex 1).  
[Source:Uiprot/SWISSPROT;Acc:Q9UP83]

TATAACATATTGTCCTCTTCCTCATATGGTTGTTTTCATCTCCTAATCCTTTTGTGTCTCCCATCTCTAGGACTTCAGCA  
GTACTGTTTTCTCTCCATTC

In100 candidate1559 (in intron):

LOCUS ENSG00000164597

DESCRIPTION Conserved oligomeric Golgi complex component 5 (13S Golgi transport complex 90 kDa subunit) (GTC-90) (Golgi transport complex 1).

[Source:Uiprot/SWISSPROT;Acc:Q9UP83]

ATCTTTTGGCCTGTAGACTTGATAACACCCCGCACACTATTCATCTTCCACATTATTATCAGAGTGATTTTCTTTTCTT  
TTTTTTTGAGATGGAGTCTT

In100 candidate1560 (in intron):

LOCUS ENSG00000164597

DESCRIPTION Conserved oligomeric Golgi complex component 5 (13S Golgi transport complex 90 kDa subunit) (GTC-90) (Golgi transport complex 1).

[Source:Uiprot/SWISSPROT;Acc:Q9UP83]

TGGAAATGCCCTTGTCGCTCATTCTAACATCTATGTTAATTCCGGGTTTTTGTTTGGTTGAATTTTCTTTCCATCAGAC  
CTGATATTTTCTACTTATT

In100 candidate1561 (in intron):

LOCUS ENSG00000127527

DESCRIPTION Epidermal growth factor receptor substrate 15-like 1 (Eps15-related protein) (Eps15R). [Source:Uniprot/SWISSPROT;Acc:Q9UBC2]

TAATTCCTCCTTTTCATTTGCAAGTAACTCTCCCCTCTGCCTTTTTTTTTTTTTTACTGTTAGAAGCTTGCAGTGTATTTT  
TCTGCTCAGCCATGATTTTTT

In100 candidate1562 (in intron):

LOCUS ENSG00000145730

DESCRIPTION Peptidyl-glycine alpha-amidating monooxygenase precursor (PAM)

Includes: Peptidylglycine alpha-hydroxylating monooxygenase (EC 1.14.17.3) PHM);  
Peptidyl-alpha-hydroxyglycine alpha-amidating lyase (EC 4.3.2.5)  
(Pepidylamidoglycolate lyase) (PAL)]. [Source:Uniprot/SWISSPROT;Acc:P19021]  
GCGGAGTATTGAAATGTTAACAAGACTGAAATGATTTTCCACCCCTTCTTTTTTTTAAATACCAGTCTGCCACAACATTT  
TTCCTCTTAGGCTTTTATGT

In100 candidate1563 (in intron):

LOCUS ENSG00000172403

DESCRIPTION Synaptopodin-2 (Myopodin) (Genethonin 2).

[Source:Uniprot/SWISSROT;Acc:Q9UMS6]

AGTTAGAATTTTAACATAAATTTGATTCTGACTTTTTGTCAGTTGTTCTAGTTATCATATTTTAGTACTTTTTATCATCT  
CCTTCATTGCTTCCTTCCCA

In100 candidate1564 (in intron):

LOCUS ENSG00000172403

DESCRIPTION Synaptopodin-2 (Myopodin) (Genethonin 2).

[Source:Uniprot/SWISSROT;Acc:Q9UMS6]

TGTTTTTAAATTTGGCTTTTACTCCCTAACTTTGGCATTTGTATTAACTTTGCCATTTTCCTTTATACAGGATACATGAT  
TTTCTCCCCACTTCTAATTT

In100 candidate1565 (in intron):



LOCUS ENSG00000153310

DESCRIPTION Protein FAM49B (L1). [Source:Uniprot/SWISSPROT;Acc:Q9NUQ9]

TGGGACCTACTCTAACTTATTTTTTTCATTTATCTCTTGCATAGTTTCAGTTGGTTTTGCCCTGTACTTTGAAATATCTTT  
ATTCTGGTGTCATCTTTCTT

In100 candidate1566 (in intron):

LOCUS ENSG00000178636

DESCRIPTION CDNA FLJ40807 fis, clone TRACH2009268.

[Source:Uniprot/SPTREMBLAcc:Q8N7N2]

CAATAAGAGCACACCATTAACCTCTTCCCTCCGTTTCTCTAATGTCATTTTCTCCTCATTCTGCAGCTACTTTTCTGGTGC  
ACTTTAAATACTGTTTTTCC

In100 candidate1567 (in intron):

LOCUS ENSG00000132294

DESCRIPTION Protein EFR3-like. [Source:Uniprot/SWISSPROT;Acc:Q14156]

AGTATTTGAAAAATTATTCTTTGCATTTTCTAACACAATCCTTTTGTAATTTTCTTTCTGTTTATTCAGAGGTCTTCTCT  
TTCTGCTCTTATTGTGCTGA

In100 candidate1568 (in intron):

LOCUS ENSG00000185238

DESCRIPTION Protein arginine N-methyltransferase 3 (EC 2.1.1.-) (Heterogeneous  
nuclear ribonucleoprotein methyltransferase-like protein 3).

[Source:Unirot/SWISSPROT;Acc:O60678]

TTAACTCATGTAACTTACCTTCTTGGTTCTCTTACTTTTGTGGCTCCAGCTTCTCGGTCAAGTCCCTTGAATTCTAGT  
ATTCATTATCTATTCTCCCT

In100 candidate1569 (in intron):

LOCUS ENSG00000185238

DESCRIPTION Protein arginine N-methyltransferase 3 (EC 2.1.1.-) (Heterogeneous nuclear ribonucleoprotein methyltransferase-like protein 3).

[Source:Unirot/SWISSPROT;Acc:O60678]

AGTGCTTACAACCTGAAGTAACTATATCTGTCATTTTCTTTGTCTTAAACTTATTTTTTGGTTACCCAGAACTTCCCA  
GTATTTCTTTCACCTATATTA

In100 candidate1570 (in intron):

LOCUS ENSG00000184156

DESCRIPTION Potassium voltage-gated channel subfamily KQT member 3  
(Voltagegated potassium channel subunit Kv7.3) (Potassium channel subunit alpha  
KvLT3) (KQT-like 3). [Source:Uniprot/SWISSPROT;Acc:O43525]

ATGAAATCACATTCGTCCTTGAACATGATTAACCTCATTTCCACCTTCTGATTTTTGCACCAGCTGCTCCCTCTGCCTGGA  
ATATGCTTTCTGTATATCTT

In100 candidate1571 (in intron):

LOCUS ENSG00000184156

DESCRIPTION Potassium voltage-gated channel subfamily KQT member 3  
(Voltagegated potassium channel subunit Kv7.3) (Potassium channel subunit alpha  
KvLT3) (KQT-like 3). [Source:Uniprot/SWISSPROT;Acc:O43525]

GGCACCTGGTAAGTGATACGTAAGTGTTTGTACTGCTAACTTCATTTCTCCCTTTTTGTTCCGATCAGGCTGAATGAAATATTCTGTCTTTTTTTTTTTT

In100 candidate1572 (in intron):

LOCUS ENSG00000184156

DESCRIPTION Potassium voltage-gated channel subfamily KQT member 3 (Voltagegated potassium channel subunit Kv7.3) (Potassium channel subunit alpha KvLT3) (KQT-like 3). [Source:Uniprot/SWISSPROT;Acc:O43525]

AACTTTTAAGTAACAATCTCCCTGCCACCCACTTCCTCTTCCATTCTTTCATTGGTGATGTTCTTTCTCTATTTGCAGCCCTACCTTGTCGGTTTTTTTC

In100 candidate1573 (in intron):

LOCUS ENSG00000145725

DESCRIPTION Histidine acid phosphatase domain containing 1 [Source:RefSeq\_pptide;Acc:NP\_056031]

AGTGCAATCACATTTAACAAATTGAAAATTCTTACTATGGCTTCTCAGTCCTTGTGTGCATCTTAGCTACTTATCTGACATGATTTTTTACCATTTTTTC

In100 candidate1574 (in intron):

LOCUS ENSG00000145725

DESCRIPTION Histidine acid phosphatase domain containing 1 [Source:RefSeq\_pptide;Acc:NP\_056031]

ACCTTTCTAACCTCCTCATATATTTGTTTTTCCCCTCTTCTTTTAAGTGTTCTTTTTGTAGCTGTTACGAATTTTCAGGTACCTGTTTTTCTCTTTCTTA

In100 candidate1575 (in intron):

LOCUS ENSG00000165970

DESCRIPTION Sodium- and chloride-dependent glycine transporter 2 (GlyT2)  
(GyT-2) (Solute carrier family 6 member 5). [Source:Uniprot/SWISSPROT;Acc:Q9Y45]  
AACGGGGGTTTAATAGTGTTGAGTGCTTGAATAATTCACGCCACCACCCTAACACGTGTGTCACCTTTCTCTTTCCAGTT  
TATCCTTTGCTTCAGCTTTT

In100 candidate1576 (in intron):

LOCUS ENSG00000157884

DESCRIPTION calcium and integrin binding family member 4  
[Source:RefSeq\_peptide;Acc:NP\_001025052]

GCTTATTAGATATAACTAATATGCTTATTCTTATTTATATCTAACCTTCTATACTGAATATCTTCTATATTCCAGGTGAT  
GTCCATGTATTTTCTTATTT

In100 candidate1577 (in intron):

LOCUS ENSG00000138738

DESCRIPTION PR domain zinc finger protein 5 (PR domain-containing protein 5.  
[Source:Uniprot/SWISSPROT;Acc:Q9NQX1]

CATAACCTCCTATATTATTTTCTACTTTTCTTCTTACGTTTATTTACAGGACATCATATTGAGAATTTTCATGTTCAATA  
CCTTTCCCTTTTATTTCTTC

In100 candidate1578 (in intron):

LOCUS ENSG00000165973

DESCRIPTION Protein kinase C-binding protein NELL1 precursor (NEL-like protein 1) (Nel-related protein 1). [Source:Uniprot/SWISSPROT;Acc:Q92832]

AGATTTAACTTTTTTAAAAGGGCTTCAACCTGCTTTTTCAGTTCCTTCTCTGAACTGACATGTTTTCTGGTTCTGAGTTT  
TCTCCTCTCCTTTACTTCTT

In100 candidate1579 (in intron):

LOCUS ENSG00000165973

DESCRIPTION Protein kinase C-binding protein NELL1 precursor (NEL-like protein 1) (Nel-related protein 1). [Source:Uniprot/SWISSPROT;Acc:Q92832]

AGTCTCTAACTCTTGGGTTTATTCTTTACCCATTAGTTTTCTTCAAACTTTGTCTCACTACTATGCAGTTTTTTTCCTT  
CTTCGAATTCTCTCACCTTT

In100 candidate1580 (in intron):

LOCUS ENSG00000165973

DESCRIPTION Protein kinase C-binding protein NELL1 precursor (NEL-like protein 1) (Nel-related protein 1). [Source:Uniprot/SWISSPROT;Acc:Q92832]

AATTAAATGTAAATACCTACATTTAATTGCCTGCTTTTTCTCTAGATGATAACATTTTAAATAAATATTCTTCACCAGTA  
TCTTCTTTATTTTCTTTT

In100 candidate1581 (in intron):

LOCUS ENSG00000165973

DESCRIPTION Protein kinase C-binding protein NELL1 precursor (NEL-like protein 1) (Nel-related protein 1). [Source:Uniprot/SWISSPROT;Acc:Q92832]

TTGAATTTTTATGATATTAGAGATGGGAAATGTTCACTTAATTTTGTTAACATTTCTTTTCTCTCTATTATCGCAGGC  
TAAATTTTCCACTTTCTTA

In100 candidate1582 (in intron):

LOCUS ENSG00000165973

DESCRIPTION Protein kinase C-binding protein NELL1 precursor (NEL-like protein 1) (Nel-related protein 1). [Source:Uniprot/SWISSPROT;Acc:Q92832]

TCCTTATGCAATCAATTTGACTTTAACTATTTCTCTCTCTCTCTCTATTTTCTCACTTTCCTATTACTTGTGTCAGTA  
CCTGAGTTTTTTCTTATCCT

In100 candidate1583 (in intron):

LOCUS ENSG00000165973

DESCRIPTION Protein kinase C-binding protein NELL1 precursor (NEL-like protein 1) (Nel-related protein 1). [Source:Uniprot/SWISSPROT;Acc:Q92832]

ATAATATTAAGTGCCTATTCCATTTTTTTGTGTCCTCTTCAATTTATTTTCATCAACATTTTGTAGTTTTTATTGCAGAA  
GTCTTTTACTTCCTTGGTTA

In100 candidate1584 (in intron):

LOCUS ENSG00000091129

DESCRIPTION Neuronal cell adhesion molecule precursor (Nr-CAM) (NgCAM-related cell adhesion molecule) (Ng-CAM-related) (hBravo).

[Source:Uniprot/SWISSPOT;Acc:Q92823]

AATAGAATTAACCCAAAACAATTTACATTGTCCTGTGTTACTTTTTTTCTTTTTCAGGAATCTTTGTGACATTCTCTCTC  
AGCATTCTTTATCCCCTGTT

In100 candidate1585 (in intron):

LOCUS ENSG00000091129

DESCRIPTION Neuronal cell adhesion molecule precursor (Nr-CAM) (NgCAM-related cell adhesion molecule) (Ng-CAM-related) (hBravo).

[Source:Uniprot/SWISSPOT;Acc:Q92823]

CTATTAATCTTTTACCTGTGTCTTATTAAGTTGTTTACTTGTCCAATACATTTTTTCATTTAAATCATTTTTTTCAGGA  
AGTTCTATTTGGTTCTTTTT

In100 candidate1586 (in intron):

LOCUS ENSG00000091129

DESCRIPTION Neuronal cell adhesion molecule precursor (Nr-CAM) (NgCAM-related cell adhesion molecule) (Ng-CAM-related) (hBravo).

[Source:Uniprot/SWISSPOT;Acc:Q92823]

GATACTTTCTCCTATTCCATAGGTTGCCTTTAACTCTATTGATAATTCCTTTCCTGTACAGATTTTTTGTTGTTGTTGT  
TGTTTGATATAGTCCCACTT

In100 candidate1587 (in intron):

LOCUS ENSG00000091129

DESCRIPTION Neuronal cell adhesion molecule precursor (Nr-CAM) (NgCAM-related cell adhesion molecule) (Ng-CAM-related) (hBravo).

[Source:Uniprot/SWISSPOT;Acc:Q92823]

GGGATAACAAGTATTCTCAATTTACATCTGTTCTTTCAGACCTTTTCTTAATCTTTCATCATATTTGCACATTTAGAG  
ATCCATGGTCCCTTTGCTCT

In100 candidate1588 (in intron):

LOCUS ENSG00000184349

DESCRIPTION Ephrin-A5 precursor (EPH-related receptor tyrosine kinase ligand 7) (LERK-7) (AL-1). [Source:Uniprot/SWISSPROT;Acc:P52803]

AACTAATAGGAGTTTTTTGGTAGTAAGAAAAGTTTAACTTATTTTAAAATCCTTTCATTTTCAGGTATTTTAAAGACCA  
CCTTTCCATTCTATTTCTCC

In100 candidate1589 (in intron):

LOCUS ENSG00000102837

DESCRIPTION olfactomedin 4 precursor [Source:RefSeq\_peptide;Acc:NP\_006409]

EXON

GTGATTATATTGAGATATTTACCATTTACTGAGTAACATTTACATGTCTTCTCTGTATTTTTCGTAACATTTTGCAGAG  
TTGGTATTATTTTCTTCTG

In100 candidate1590 (in intron):

LOCUS ENSG00000145743

DESCRIPTION F-box/LRR-repeat protein 17 (F-box and leucine-rich repeat protein 17) (F-box only protein 13) (Fragment). [Source:Uniprot/SWISSPROT;Acc:Q9F56]

AAGAGCTCTTTCTTCTTCAACTAACAAGACACAAAACAATGTTAATGTTTTTCTCTTTTCCTGTCATCAGAGCAAATC  
TATCTTTTTTTTAGATTCTC

In100 candidate1591 (in intron):

LOCUS ENSG00000145743



DESCRIPTION F-box/LRR-repeat protein 17 (F-box and leucine-rich repeat protein 17) (F-box only protein 13) (Fragment). [Source:Uniprot/SWISSPROT;Acc:Q9F56]  
CATGTGCTAATTCATGTCTCTGTGTCATATTTGGTAACTCTCACAACCTTTTTTTTTTTCTAAATGTTACCTTCAGCT  
TTTTTTGTTGTTGAACTTTT

In100 candidate1592 (in intron):

LOCUS ENSG00000145743

DESCRIPTION F-box/LRR-repeat protein 17 (F-box and leucine-rich repeat protein 17) (F-box only protein 13) (Fragment). [Source:Uniprot/SWISSPROT;Acc:Q9F56]  
GACATTTTTTATGGATTGTGGTATATATATTTTAAACCAACATAGTTTCTTTGTACCTGATTCCTCTTATATCAGATCT  
CTTCAATTCCTGATTCTCAT

In100 candidate1593 (in intron):

LOCUS ENSG00000145743

DESCRIPTION F-box/LRR-repeat protein 17 (F-box and leucine-rich repeat protein 17) (F-box only protein 13) (Fragment). [Source:Uniprot/SWISSPROT;Acc:Q9F56]  
TATATACCCATGTAGATTTGTTAATTAATACTTTGATTTGTTTCATTTGAACTTGTCATTACCTGCTCTTCCAGTC  
TTTTTGTATATTTCCCCCTT

In100 candidate1594 (in intron):

LOCUS ENSG00000157851

DESCRIPTION Dihydropyrimidinase-related protein 5 (DRP-5) (ULIP6 protein) (ollapsin response mediator protein 5) (CRMP-5) (CRMP3-associated molecule) (CRAM). [Source:Uniprot/SWISSPROT;Acc:Q9BPU6]  
ACATTATTTTAATAACTGGCTTCATATTTTTTTCTTTTACCAACTGCTATACTAACCAGGATTTTTTTTCTTCATATAAC  
ACTATACCCTGAGTGTCTCC

In100 candidate1595 (in intron):

LOCUS ENSG00000157851

DESCRIPTION Dihydropyrimidinase-related protein 5 (DRP-5) (ULIP6 protein) (ollapsin response mediator protein 5) (CRMP-5) (CRMP3-associated molecule) CRAM). [Source:Uniprot/SWISSPROT;Acc:Q9BPU6]

AGGAATTGTATTGTATATATTTTATTAACCTTTAAGTAAAATATTTTCTCTCGACTTCTGATGCCCAGTTTTTCTCTTATCTTTCTGTCCTTTGGGTCCT

In100 candidate1596 (in intron):

LOCUS ENSG00000151422

DESCRIPTION Proto-oncogene tyrosine-protein kinase FER (EC 2.7.10.2) (p94-FR) (c- FER) (Tyrosine kinase 3). [Source:Uniprot/SWISSPROT;Acc:P16591]

AATTACTACTTTAGGCTGTAATAATATTTTAACAAGCATAATCACTGGCTTCTTCTGATGGCCTTTCAGACTTTTTTCGGTTTTTGAGACAGTCTTGCTCT

In100 candidate1597 (in intron):

LOCUS ENSG00000151422

DESCRIPTION Proto-oncogene tyrosine-protein kinase FER (EC 2.7.10.2) (p94-FR) (c- FER) (Tyrosine kinase 3). [Source:Uniprot/SWISSPROT;Acc:P16591]

TTCCCCTAACCTCCCATGGTTATCCTTCTCTCACAAGGCATTGTTTTCTCCTTTTTTGCATGTTTATGTTTTTAGCAGGGCTTTATCTTGCTTTTATTTT

In100 candidate1598 (in intron):

LOCUS ENSG00000198961

DESCRIPTION E3 ubiquitin-protein ligase Praja2 (EC 6.3.2.-) (Praja-2)  
(RINGfinger protein 131). [Source:Uniprot/SWISSPROT;Acc:O43164]

CATAAAGTTGTTTCTTAATTATTTAATGCCTATAACGTCTGTAGTGGTGTCTTTCCTTTCATTCTTGTTATTAGCAGTG  
TGACCTCTCATTTTTTATTTG

In100 candidate1599 (in intron):

LOCUS ENSG00000134343

DESCRIPTION Transmembrane protein 16C. [Source:Uniprot/SWISSPROT;Acc:Q9BYT9  
AAGCAACAAGTAAGTTTCCAAAAAGATGATTGAATATAACAAATCTGAAGTTTATAGTTTTTATACTTTGTTTTTCAGGA  
CTTATTGCTATTTTAATTTT

In100 candidate1600 (in intron):

LOCUS ENSG00000134343

DESCRIPTION Transmembrane protein 16C. [Source:Uniprot/SWISSPROT;Acc:Q9BYT9  
ATGCTTAACATAATTGGATGCTCGTAACTTTATGATTCTTTTCTCATCACTTTTGTGTGTCTCGGTTATTTGTTCCAGCT  
GACCTGTGTTTATATCTCTC

In100 candidate1601 (in intron):

LOCUS ENSG00000134343

DESCRIPTION Transmembrane protein 16C. [Source:Uniprot/SWISSPROT;Acc:Q9BYT9  
TTGCATGACTACAAAACAAGTGACATTAAGTGTGTTGACCACAATTTAGTTTTCACTTTCCAGTTGATGGACTATTTTATT  
TGTTTTTCAGCCTTCTGCTTT

In100 candidate1602 (in intron):

LOCUS ENSG00000112893

DESCRIPTION Alpha-mannosidase 2 (EC 3.2.1.114) (Alpha-mannosidase II)  
(Mannsyl- oligosaccharide 1,3-1,6-alpha-mannosidase) (MAN II) (Golgi  
alphanmannsidase

II) (Mannosidase alpha class 2A member 1).

[Source:Uniprot/SWISSPROTAcc:Q16706]

AGAAGCACTGGTAACCTAATAATTTGAAGGTTTTTTTCTTTGCTTCCAGCATTCATTTATCTTCTACTTACATTTTTTCC  
CCATTAGTTTATTGGCAGAT

In100 candidate1603 (in intron):

LOCUS ENSG00000112893

DESCRIPTION Alpha-mannosidase 2 (EC 3.2.1.114) (Alpha-mannosidase II)  
(Mannsyl- oligosaccharide 1,3-1,6-alpha-mannosidase) (MAN II) (Golgi  
alphanmannsidase

II) (Mannosidase alpha class 2A member 1).

[Source:Uniprot/SWISSPROTAcc:Q16706]

TATTTTCATCTTTTAGTGTTTGATATACAAAATTTTAACATATTTATCTACTCAAATCTGTTATTCTGTTTTCTTCAGAT  
ATTGCTTTTGCTGTCATGTT

In100 candidate1604 (in intron):

LOCUS ENSG00000112893

DESCRIPTION Alpha-mannosidase 2 (EC 3.2.1.114) (Alpha-mannosidase II)  
(Mannsyl- oligosaccharide 1,3-1,6-alpha-mannosidase) (MAN II) (Golgi alpha

mannsidase II) (Mannosidase alpha class 2A member 1).

[Source:Uniprot/SWISSPROTAcc:Q16706]

AGATTTATTATTTTGTTCATTTAACATTTCTTATCTCCATTTCTCTTATATTTTCCTTCAGCTTGATCTTTGACTCTCCT  
TTTGCTTGTTTTTTGTTAAC

In100 candidate1605 (in intron):

LOCUS ENSG00000139734

DESCRIPTION Protein diaphanous homolog 3 (Diaphanous-related formin-3) (DRF).

[Source:Uniprot/SWISSPROT;Acc:Q9NSV4]

TGTCCGTAGCTATCATCCCTTAACAAAATTATAAAGTTGTTACATTTTCATTGTTGTTATCTCACACCTTTTGTCTCAGAA  
TTTATCTTCCATTTTCTCTG

In100 candidate1606 (in intron):

LOCUS ENSG00000139734

DESCRIPTION Protein diaphanous homolog 3 (Diaphanous-related formin-3) (DRF).

[Source:Uniprot/SWISSPROT;Acc:Q9NSV4]

TCTAACTTGTGTATCTAGCTATTTTCTCCTTGTTACTTTTCTGCTCTACACATCGTTTACTCCAGTAACATTGGTCTCCT  
TTTTCTCTAAATTGGCTTT

In100 candidate1607 (in intron):

LOCUS ENSG00000139734

DESCRIPTION Protein diaphanous homolog 3 (Diaphanous-related formin-3) (DRF).

[Source:Uniprot/SWISSPROT;Acc:Q9NSV4]

CCCTCTTCTTTCTCAATGATTTTATAAAACACATATAATTTTTTTAATAACTCTTTTGTGAGCAATTTTACCTTCCAGAC  
TTTCTATACTTTGGCTTTCA

In100 candidate1608 (in intron):

LOCUS ENSG00000139734

DESCRIPTION Protein diaphanous homolog 3 (Diaphanous-related formin-3) (DRF).

[Source:Uniprot/SWISSPROT;Acc:Q9NSV4]

TTTGGCTAATATTTACATGCTTTTCTTGACTTTGTTGTTCTAACATATTGTCTTCTCTCTGGTCCTTGATTTCAGTGGTC  
CTATTCTATTTGTAACCTTC

In100 candidate1609 (in intron):

LOCUS ENSG00000184903

DESCRIPTION Mitochondrial inner membrane protease subunit 2 (EC 3.4.99.-)

(MP2- like protein). [Source:Uniprot/SWISSPROT;Acc:Q96T52]

CATTTCACTAAATAATAACTAATAAAAGTTGTGCCTTGTCACCTGTTTTGGTGCCTGTTTATACTATTCCTTCTCACAGTG  
ATGTTTTATTCCATTTTATT

In100 candidate1610 (in intron):

LOCUS ENSG00000184903

DESCRIPTION Mitochondrial inner membrane protease subunit 2 (EC 3.4.99.-)

(MP2- like protein). [Source:Uniprot/SWISSPROT;Acc:Q96T52]

AACTAAGAATTTTACTTTGTTGGCTCTTAACATAATGAAATATATTCTGGTTTTTCAGGCCCTTTTTTCGACTTTTGTTTC  
CTGCATGTTCTTTCTTTGTC

In100 candidate1611 (in intron):

LOCUS ENSG00000184903

DESCRIPTION Mitochondrial inner membrane protease subunit 2 (EC 3.4.99.-)  
(MP2- like protein). [Source:Uniprot/SWISSPROT;Acc:Q96T52]

CCCTCCCTCCCCTTCTCCCTCCCCCTCTCCTACTTTCCTTCCCTTTTATAACTATTGTCATACTATGCCTTTACCAGTG  
TTCTGTTTTTAATCCTCTAA

In100 candidate1612 (in intron):

LOCUS ENSG00000184903

DESCRIPTION Mitochondrial inner membrane protease subunit 2 (EC 3.4.99.-)  
(MP2- like protein). [Source:Uniprot/SWISSPROT;Acc:Q96T52]

TATATGACTTATTTTTTAACCCATGAATTAAATTTTCCTTATTAAATGTTTCATTTGCTTTTGCCTTTCATTTTTCAGGAA  
TCATTTCTCCTAGTCTGTCT

In100 candidate1613 (in intron):

LOCUS ENSG00000184903

DESCRIPTION Mitochondrial inner membrane protease subunit 2 (EC 3.4.99.-)  
(MP2- like protein). [Source:Uniprot/SWISSPROT;Acc:Q96T52]

TCTCTTAAAATAATTAATTAGATTTAAAATAAGACTGCATATGTAACCACCAAACCTATATCTTTTTTAACAGTTTATTG  
GCGTTAAGATTTTCTCCCTT

In100 candidate1614 (in intron):

LOCUS ENSG00000184903

DESCRIPTION Mitochondrial inner membrane protease subunit 2 (EC 3.4.99.-)  
(MP2- like protein). [Source:Uniprot/SWISSPROT;Acc:Q96T52]

TTTCCAATAGCATACTAACGTGCTGTTTGTTATCCTATATATTTTTTAAATCTCTGTCTCTCTGCTTCTGCCTCCAGTG  
ACTTCCTATTTCTCTCCTTT

In100 candidate1615 (in intron):

LOCUS ENSG00000083544

DESCRIPTION Tudor domain-containing protein 3.

[Source:Uniprot/SWISSPROT;Ac:Q9H7E2]

TTTCTTAGTTTCCTTATTGGTACTAACAAAGTTCTATCTTTGGTCCACTTTCTTGTTCTTCTGACTTTAACTGATCAGTC  
TCTCTCTCTCTTTTTTTTTT

In100 candidate1616 (in intron):

LOCUS ENSG00000128512

DESCRIPTION Dedicator of cytokinesis protein 4.

[Source:Uniprot/SWISSPROT;Ac:Q8N1I0]

AAGGCAAATAAAAGCTCATCGCTTTCTAAAACACTAAAATACTCTCAATTAACTTTTGCTGTTTTTTTATGTTTCCAGAA  
TCTCTTGATATTGTTTTATT

In100 candidate1617 (in intron):

LOCUS ENSG00000128512

DESCRIPTION Dedicator of cytokinesis protein 4.

[Source:Uniprot/SWISSPROT;Ac:Q8N1I0]

AGAGCTTTGAGATGATAACTAATTTTCACATATTTCTTTTTCTTTTCGCAGTTCTCTGAGTCTTACCTATTACAATTCTCT  
TTTGGTTCTCTTTTTCAGTA



In100 candidate1618 (in intron):

LOCUS ENSG00000128512

DESCRIPTION Dedicator of cytokinesis protein 4.

[Source:Uniprot/SWISSPROT;Ac:Q8N1I0]

CCAATATGCAATTTTATTTTACAAAAGTATTTACATTTCTTAACAATAAATCAAAATCATTCCTTATTTACCAGTT  
TCTGTATCAGCCCTTTGTAT

In100 candidate1619 (in intron):

LOCUS ENSG00000066827

DESCRIPTION Zinc finger protein 406 (ZFAT zinc finger 1).

[Source:Uniprot/SISSPROT;Acc:Q9P243]

CTTTACCCTAACTTTTATGTTTTCTTTGCTTTTATCTTGTGCTGCATTCTGCGTATTTACTTCTGATCCATTTTCCAGTT  
CACTATTTTTTACCTGTTAT

In100 candidate1620 (in intron):

LOCUS ENSG00000066827

DESCRIPTION Zinc finger protein 406 (ZFAT zinc finger 1).

[Source:Uniprot/SISSPROT;Acc:Q9P243]

TCCATCCCATTTTCTGTACCCTCTAAGCTCGAATAACTGGTGAGTTAATGGAATTTTCCTTTTCTTGTTCCCACAGAG  
GCACTTTTTTGACTTCTACT

In100 candidate1621 (in intron):

LOCUS ENSG00000138688

DESCRIPTION CDNA: FLJ21404 fis, clone COL03835.

[Source:Uniprot/SPTREMBL;Ac:Q9H742]

CTGTGAAATGAAGGTTTTCTTAAGGTTTGTTTCTGTTTAACAAACTCAAACATCTTTGACTTTTCTCTGTAAATCAGAT

CCTTTTAATGGTATG TTCCT

In100 candidate1622 (in intron):

LOCUS ENSG00000198839

DESCRIPTION Zinc finger protein 277. [Source:Uniprot/SWISSPROT;Acc:Q9NRM2]

EXON

AGTATCCATAAAATGTTTTGATAGCCATAGCTAATAACATCCATCTTGGTTTTACTTTCGTCTGTTAATCCAGGTTATT  
TCCATTGGATTTGTCCCTTT

In100 candidate1623 (in intron):

LOCUS ENSG00000134986

DESCRIPTION Neuronal protein 3.1 (Protein p311).

[Source:Uniprot/SWISSPROT;cc:Q16612]

GTTGTATACTTGATAGAAGAATATTGACCACTTAGTAACTGAGCAACACCTTCCCTTTTTGGTAGCAGTTGAGGCTGTG  
ATGCCTTTTTTTTCCATTTC

In100 candidate1624 (in intron):

LOCUS ENSG00000164603

DESCRIPTION CDNA FLJ31818 fis, clone NT2RP6000017.

[Source:Uniprot/SPTREMBLAcc:Q96MV7]

AGTCTCTGTACTTCCTCTTTAAGGCCAATAACTCTTAGATTTGCCCTTTGAGGCTATTTTCCAGACTTGTAAGCATTCT  
TCTTTCTTTTTCACTCCTTT

In100 candidate1625 (in intron):

LOCUS ENSG00000184226

DESCRIPTION Protocadherin-9 precursor. [Source:Uniprot/SWISSPROT;Acc:Q9HC56  
AAGATTCCCCAAACAAAGTTTTCTTCTCAATTTAACTTTGAAAAGTGCTTTTGCTTTGATAGTCTTCTGTCCAATCAGCT  
TTTTTAAAATTCCTCTTGAT

In100 candidate1626 (in intron):

LOCUS ENSG00000184226

DESCRIPTION Protocadherin-9 precursor. [Source:Uniprot/SWISSPROT;Acc:Q9HC56  
AGTAACTAGCTATTTGTTCTCTCCAAGGTTTTCTTTCTTATATAGAGATCATTTTTTCCCCTTCCTTAATCTACAGTGGG  
ATTTCTTTCTCTACTTCATT

In100 candidate1627 (in intron):

LOCUS ENSG00000129595

DESCRIPTION Band 4.1-like protein 4A (Protein NBL4).  
[Source:Uniprot/SWISSPOT;Acc:Q9HCS5]  
AGACTTGGTCTCCTGCTAATAACCTTTCTCCTCTTCCCTGTCATTTCTTCAATGTTTCAGGCTGGCCTTTGTGTTTCCTTAC  
CTCTTGTTTCATCAAAATCT

In100 candidate1628 (in intron):

LOCUS ENSG00000154415

DESCRIPTION Protein phosphatase 1 regulatory subunit 3A (Protein phosphatas 1  
glycogen-associated regulatory subunit) (Protein phosphatase type-1 glycogen  
targeting subunit). [Source:Uniprot/SWISSPROT;Acc:Q16821]  
AGTCTTGCTTTTAAAATTGGCCTGTGGCAATACATATATAAAGTCTTTTAACTGAGTATAAATTTAGCTGCCTTTCAGTT  
TTTtagTTAGCTTGTTTCTT

In100 candidate1629 (in intron):

LOCUS ENSG00000076382

DESCRIPTION Sperm-associated antigen 5 (Astrin) (Mitotic  
spindleassociatedprotein  
p126) (MAP126) (Deepest).

[Source:Uniprot/SWISSPROT;Acc:Q96R06]

GTTCTCTTCTGGAATTTCTTTTATTTAACTGTTAGGTATCCTGGGTTTATCTTCTAATTCTCTTAGCTTTTTCTTCAGAT  
TTACATTTCTTTATATTTTT

In100 candidate1630 (in intron):

LOCUS ENSG00000128573

DESCRIPTION Forkhead box protein P2 (CAG repeat protein 44) (Trinucleotide  
repeat- containing gene 10 protein). [Source:Uniprot/SWISSPROT;Acc:O15409]

AACTCTTAATAGTGGTTATGTCTGGGTAACCAAGCTAGGGGTAACTTTTTCTTGTTCTACATTTTTTAGTTTCTACAGTT  
ATCATGCATTCTTTATTTTG

In100 candidate1631 (in intron):

LOCUS ENSG00000128573

DESCRIPTION Forkhead box protein P2 (CAG repeat protein 44) (Trinucleotide  
repeat- containing gene 10 protein). [Source:Uniprot/SWISSPROT;Acc:O15409]

CTTGTTTTGAACTAACATGATTCATGTTATTCTTATCTCTTATTTGGACAGTTGCACGTACGTTTTTACAAGTCTTTATA  
CCTCTGTCTTGTCTCACTCT

In100 candidate1632 (in intron):

LOCUS ENSG00000102974

DESCRIPTION Transcriptional repressor CTCF (CCCTC-binding factor) (CTCFL  
paalog) (11-zinc finger protein). [Source:Uniprot/SWISSPROT;Acc:P49711]

TGTCTCAAAAAAAAAACAAAGTAACATTTTGTTTCTTTTGTTGTTTAACTTCTACATGTGTATCTTTGTTTTTTCAGCC  
TCTTTTATTCTTCATAGCTA

In100 candidate1633 (in intron):

LOCUS ENSG00000102974

DESCRIPTION Transcriptional repressor CTCF (CCCTC-binding factor) (CTCFL  
paalog) (11-zinc finger protein). [Source:Uniprot/SWISSPROT;Acc:P49711]

GTGATAAGCATAGCTGCTTTCAAATCCTAACAACTTGTACATTTATATTCCTACTCCAGATCTTTCTTTTGAGTTAGCCT  
TATATAACTGTGTATCCCTT

In100 candidate1634 (in intron):

LOCUS ENSG00000205160

DESCRIPTION

GTTCTCTTCTGGAATTTCTTTTATTTAACTGTTAGGTATCCTGGGTTTATCTTCTAATTCTCTTAGCTTTTTCTTCAGAT  
TTACATTTCTTTATATTTT

In100 candidate1635 (in intron):

LOCUS ENSG00000150361

DESCRIPTION Kelch-like protein 1. [Source:Uniprot/SWISSPROT;Acc:Q9NR64]

GGTAACGTCTCTTGTGTCATTTCTGATTGTGTTTATTTGGATCTTCTCTCTTTTCTTCTTTATTAGTCTAGCTAGCAGCC

TATCCTGTTTTTTGTTGTTG

In100 candidate1636 (in intron):

LOCUS ENSG00000150361

DESCRIPTION Kelch-like protein 1. [Source:Uniprot/SWISSPROT;Acc:Q9NR64]

GTGAATCAACTAAAGCACCAATTCCTAAATGTTTTTAAATAATAACCATCTTGAAAACATTATTTTACTTCAGTTTTG  
ACTATTTGTTAATATCTTCC

In100 candidate1637 (in intron):

LOCUS ENSG00000150361

DESCRIPTION Kelch-like protein 1. [Source:Uniprot/SWISSPROT;Acc:Q9NR64]

CAACCTCATCCTTGGCTGCATTTTAAATCTCTTTAATTAAGTGTCTTACTATCTTCTTTAGTGCCTATTTTAAATCAGAT  
ATATCCATCTCTATTTTATA

In100 candidate1638 (in intron):

LOCUS ENSG00000169519

DESCRIPTION methyltransferase 5 domain containing 1

[Source:RefSeq\_peptide;cc:NP\_689849]

CCTCTTCAACCTCCCCTTCTGCCAACATGCGTTACTTCCTACTTGATAACCATATGAGGCACATAATTTTCTTTTCAGGT  
CTCTGACTTTGCACTTGCTT

In100 candidate1639 (in intron):

LOCUS ENSG00000169519

DESCRIPTION methyltransferase 5 domain containing 1

[Source:RefSeq\_peptide;cc:NP\_689849]

CATGAATTTGATAGGAGAACTCCATATTGGTAACTCCTTCGGCATGTTATAACCTTTTCCAGCTCCATCTTTTCTCCTG  
AAACCTATCAAGAGTCTTTT

In100 candidate1640 (in intron):

LOCUS ENSG00000135272

DESCRIPTION MyoD family inhibitor domain containing isoform p40

[Source:RefSeq\_peptide;Acc:NP\_951038]

TTAGGGTTTGCTAAGTAGAACTATGAGAAGAGTTATTTTAACATGAATTTAATTTTCGTTTGTGGTTTTTACTTACAGTC  
TACTTCTGTTTTTCAGATTCA

In100 candidate1641 (in intron):

LOCUS ENSG00000135272

DESCRIPTION MyoD family inhibitor domain containing isoform p40

[Source:RefSeq\_peptide;Acc:NP\_951038]

AGACACTAAAACTTTTTTATTTTCATTCTGCTATCAAATCTTATTAACACCTCTTCTTCTTTTTGCTAATTATCAGATTTT  
TCTATCTGTCACTTAACTTC

In100 candidate1642 (in intron):

LOCUS ENSG00000165659

DESCRIPTION Dachshund homolog 1 (Dach1). [Source:Uniprot/SWISSPROT;Acc:Q9UI6]

AGAAAGTTTTAGCGATACCCATAAATGTTAACATTTTATAAAATTTTAGAATTTTTTTTATTTTCAGCATAAATATTTTAT  
TCTTTTTTTATTTATTTTATT

In100 candidate1643 (in intron):

LOCUS ENSG00000169398

DESCRIPTION Focal adhesion kinase 1 (EC 2.7.10.2) (FADK 1) (pp125FAK)

(Protein- tyrosine kinase 2). [Source:Uniprot/SWISSPROT;Acc:Q05397]

TCTGTGTCCATAGGAACTAACTCTGAATGATATCGTTTTCTTTACTCCAGCTGCTTGAGCTTACTGGTTTGTTGTGTT  
GTTTGTTGCTCTCACTTCTT

In100 candidate1644 (in intron):

LOCUS ENSG00000169398

DESCRIPTION Focal adhesion kinase 1 (EC 2.7.10.2) (FADK 1) (pp125FAK)

(Protein- tyrosine kinase 2). [Source:Uniprot/SWISSPROT;Acc:Q05397]

AGTCATTCTTATGTATTCTTTCAAATAACCAATTTCTGGTTTCATTTATCTTTTGCATGGTTTTTCATGTCTCAGTTCCA  
TTTAGTTCAGCTCTGATTTT

In100 candidate1645 (in intron):

LOCUS ENSG00000145375

DESCRIPTION spermatogenesis associated factor SPAF

[Source:RefSeq\_peptide;Ac:NP\_660208]

AGTTTTGTTTTTGTGTTTTGGCTGAACCTTTTAACTCCCCATCTGCGTCATGCTTTTCTTTTTTTCTTGACCACAGCTTCT  
AGGATCTTAGTCTGCTTCCT



In100 candidate1646 (in intron):

LOCUS ENSG00000145375

DESCRIPTION spermatogenesis associated factor SPAF

[Source:RefSeq\_peptide;Ac:NP\_660208]

AGACTTCCTTTAACCAACCTGTAGTTTTGTTTTCTTTCTTAATAGCCTCAGGTCTCAGACACAACCATCTTTTATTTATT  
TTTTCTTTCTTTCTGGAATC

In100 candidate1647 (in intron):

LOCUS ENSG00000145375

DESCRIPTION spermatogenesis associated factor SPAF

[Source:RefSeq\_peptide;Ac:NP\_660208]

AGAATTACTCAAGCCAATGATAATGCCGATTTGAGCATTTTAACATTCCACCTTATTTCTCTTCTTCCAAATTCTCAGTC  
TCTCTATTTCTCATTCTTT

In100 candidate1648 (in intron):

LOCUS ENSG00000170959

DESCRIPTION doublecortin domain containing 5

[Source:RefSeq\_peptide;Acc:NP\_40864]

TTGCTTAACGGCTTCTGTTTATATTTTTCTGCCTTCTCTTTATATTTATTTTGGCTTCAGGGTCACTGTACCATCTGA  
ACTACTTTCTTTGTGTCTTC

In100 candidate1649 (in intron):

LOCUS ENSG00000151458

DESCRIPTION Ankyrin repeat domain-containing protein 50.

[Source:Uniprot/SWSSPROT;Acc:Q9ULJ7]

TATGCTTTCTTTCTACTCATAAACATAACATATCTGTGCATTTATTCAAGTTTCTCCTTAGATTTTCCAGTTATCCTTCT

ATATGTCCTACACATATCTT

In100 candidate1650 (in intron):

LOCUS ENSG00000188682

DESCRIPTION CDNA FLJ44078 fis, clone TESTI4039038.

[Source:Uniprot/SPTREMBLAcc:Q6ZU04]

TAACCTGGGCTATAATGGTCCTATGATCCATCCTATTTGTCTTCCAGATGTTCTTGTTTTCACTCTACACTACACCTCT  
CTCATTTCTCTGATATATT

In100 candidate1651 (in intron):

LOCUS ENSG00000188682

DESCRIPTION CDNA FLJ44078 fis, clone TESTI4039038.

[Source:Uniprot/SPTREMBLAcc:Q6ZU04]

TTCCATGTCTCTTAACCTCTTCTTTAATATTTTTCATCTCTTTGTATCTTTATGATGCATTTTTGCATCTTATTTTCAGAC  
ATTTTTCTTCCATATTATTA

In100 candidate1652 (in exon):

LOCUS ENSG00000172795

DESCRIPTION mRNA decapping enzyme 2 (EC 3.-.-.-) (hDpc) (Nucleoside  
diphosphate- linked moiety X motif 20) (Nudix motif 20).

[Source:Uniprot/SWISSPROT;cc:Q8IU60]

GGGTCTCTTTCTGTATATAATTTCTCAAGCCATATTAAAGGAGAAAGTAACTTCCTTGACACTATTTATACTCTTCAGTC  
ATTGTCCGTTTTTGCTGCCT

In100 candidate1653 (in intron):

LOCUS ENSG00000172795

DESCRIPTION mRNA decapping enzyme 2 (EC 3.-.-.-) (hDpc) (Nucleoside  
diphosphate- linked moiety X motif 20) (Nudix motif 20).

[Source:Uniprot/SWISSPROT;cc:Q8IU60]

TTCTTTAAGTATTTAAACTCTGTCCCCTCTCCCCCACACAAATCTTAACCATTTCTGAATTTATCATATTTTCAGTCAAA  
ACAATTTATTTTCTCTCTCT

In100 candidate1654 (in intron):

LOCUS ENSG00000186688

DESCRIPTION Doublecortin domain-containing protein 1.

[Source:Uniprot/SWISSROT;Acc:P59894]

TGCTTTTTTCCTATTTGCTTTCTTTGATTGTTAGTCGGTTTAACACTGGCTTTATTTGTCCTTTTCATTATATGTCAGTC  
TTTCTTCTCATGTGACACTT

In100 candidate1655 (in intron):

LOCUS ENSG00000088538

DESCRIPTION Dedicator of cytokinesis protein 3 (Modifier of cell adhesion)  
Presenilin-binding protein) (PBP). [Source:Uniprot/SWISSPROT;Acc:Q8IZD9]

GCATATATATTTATAATTGTTATATTCTCTTGCTAACTTGATTGCTTTATTACTGTGTTGCCTTGTCTCTTTTTACAGCT  
TTTAACTACAGGTCTTTTTC

In100 candidate1656 (in intron):

LOCUS ENSG00000088538

DESCRIPTION Dedicator of cytokinesis protein 3 (Modifier of cell adhesion)  
Presenilin-binding protein) (PBP). [Source:Uniprot/SWISSPROT;Acc:Q8IZD9]  
TATAGGCATTTTAACAATATTAATTATTCCAATCCATGAATCTGGCATAACCTTCCATTTATTTTGTGTCCTTTTCAGTT  
TCTTTCATTAGTGTTTTGTA

In100 candidate1657 (in intron):

LOCUS ENSG00000088538

DESCRIPTION Dedicator of cytokinesis protein 3 (Modifier of cell adhesion)  
Presenilin-binding protein) (PBP). [Source:Uniprot/SWISSPROT;Acc:Q8IZD9]  
GTATTCCAAAGTGACTATGTTGTAACCTTGTGTATTTCCCTTGGTTTTCTTCCTGCTTGGGATTCATTCAGCTTCTTGAATG  
TGTACGTTTATGTCTTTTTC

In100 candidate1658 (in intron):

LOCUS ENSG00000088538

DESCRIPTION Dedicator of cytokinesis protein 3 (Modifier of cell adhesion)  
Presenilin-binding protein) (PBP). [Source:Uniprot/SWISSPROT;Acc:Q8IZD9]  
GGTGATAACCCCTTTATCGTTTTTTATTGCATCTATTTGATTCTTCTCTCTTTTCTTCTTTATTATTCTTGCTAGCAGTC  
TATCAATTTTGTTGATCTTT

In100 candidate1659 (in intron):

LOCUS ENSG00000170946

DESCRIPTION DPH4 homolog (CSL-type zinc finger-containing protein 3).

[Source:Uniprot/SWISSPROT;Acc:Q6P3W2]

AGTAATTCAACCACGTATCTTAACCTTTTACATTTCTTTATTTTTGTGAATTCTGTTTCTGCAGATCTATCTCTTAATTC  
TCTTTTTTTTTTTTTTTTTTTT

In100 candidate1660 (in intron):

LOCUS ENSG00000171444

DESCRIPTION Colorectal mutant cancer protein (Protein MCC).

[Source:UniprotSWISSPROT;Acc:P23508]

AGTGTGTATTAGCTATTATTATAAATATGACTATTAATATTATTGTTAACCTCTTCTCAATTCTTTGCTGTTACAGATAT  
TGTTTCATGTCTCCTCCATTT

In100 candidate1661 (in intron):

LOCUS ENSG00000171444

DESCRIPTION Colorectal mutant cancer protein (Protein MCC).

[Source:UniprotSWISSPROT;Acc:P23508]

AGAATGTTAATAAGCTAACAAGTGGCAATACTAATTCCTTTTAAATTTTATGACTTTTGCCCTAATTTTGTCCTCAGGTT  
TATTGTTTTCAATCCCTCTT

In100 candidate1662 (in intron):

LOCUS ENSG00000171444

DESCRIPTION Colorectal mutant cancer protein (Protein MCC).

[Source:UniprotSWISSPROT;Acc:P23508]

AGAGGGTAACAACTGCAACCTTTTAATGTCATTTCCCTACTTGAACCTTCCAGAGTCTCCCCATTATCTTTTCCTCTTTA  
TTTGCTTGTTGAACAGTTCA

In100 candidate1663 (in intron):

LOCUS ENSG00000105976

DESCRIPTION Hepatocyte growth factor receptor precursor (EC 2.7.10.1) (HGF  
eceptor) (Scatter factor receptor) (SF receptor) (HGF/SF receptor) (Met  
proooncogene

tyrosine kinase) (c-Met). [Source:Uniprot/SWISSPROT;Acc:P08581]

EXON

GGGATGCTTAAGATAGTGGTAAATGATGAATATAACATATCTAGTCCCTGGAGTTTTTGTACACCTTCTCTTTCTCCAGTT  
CTCTCTCTCTTTTTTTTTTTT

In100 candidate1664 (in intron):

LOCUS ENSG00000105976

DESCRIPTION Hepatocyte growth factor receptor precursor (EC 2.7.10.1) (HGF  
eceptor) (Scatter factor receptor) (SF receptor) (HGF/SF receptor) (Met  
proooncogene

tyrosine kinase) (c-Met). [Source:Uniprot/SWISSPROT;Acc:P08581]

EXON

TCCCATCTTTGGATCTCCTGAAAACAACTTGTTTCATTAACATGTCATGTAGTTTTAATGTTTGTTCAGATGCTCTGAA  
ATTTGTGACCCTTTTCCCTT

In100 candidate1665 (in intron):

LOCUS ENSG00000164066

DESCRIPTION PDZ domain-containing protein 6 (Inturned planar cell polarity  
ffector homolog). [Source:Uniprot/SWISSPROT;Acc:Q9ULD6]

TGTGCCACTCCTTCTATCCATAAATCCCCACCTCTAACAAGCAAGCCTGATTTATTTTTTTCCTAACTGACCTCCAGATA  
CACCTTGTGTGTCCATCTTT

In100 candidate1666 (in intron):

LOCUS ENSG00000164066

DESCRIPTION PDZ domain-containing protein 6 (Inturned planar cell polarity  
ffector homolog). [Source:Uniprot/SWISSPROT;Acc:Q9ULD6]

TGTGGGGTGTTAACTCTGATGATTATTTATTTTGCTATGCAGAACTTTAGTTTAATTAAGTCCCATCTATTTATCTTTG  
TTTTTGTTGCATTTGCTTTT

In100 candidate1667 (in intron):

LOCUS ENSG00000151475

DESCRIPTION solute carrier family 25 (mitochondrial carrier; adenine  
nucleoide translocator), member 31 [Source:RefSeq\_peptide;Acc:NP\_112581]

TGACCCCTTCATATGAAATGTAACTATCTTAACTATCCTTACTAGTTTTTAGCTTTATCTTTTTGCTTTTCAACAGTC  
CTGGAGTTTTTTTATTTGTT

In100 candidate1668 (in intron):

LOCUS ENSG00000151475

DESCRIPTION solute carrier family 25 (mitochondrial carrier; adenine  
nucleoide translocator), member 31 [Source:RefSeq\_peptide;Acc:NP\_112581]

AGCAAAGTATTTCAAAGACCTAACTGGACTTTTTTTGTGCTGTTGTGTGTGTTTTCTATTTCTTTTATTTCTGCCAGTTA  
TTTTCTTGTTTTTACTTTCT

In100 candidate1669 (in intron):

LOCUS ENSG00000164080

DESCRIPTION RAD54-like 2 [Source:RefSeq\_peptide;Acc:NP\_055921]

CCAATTTTCTTTGTTTTTTTAAAACAAATGCTAACATACCATAAAATACTATTTACTCCTTTTTTCACTCACCAGTAATA  
GTTTATTCCTTATCATTTCT

In100 candidate1670 (in intron):

LOCUS ENSG00000004866

DESCRIPTION suppression of tumorigenicity 7 isoform a

[Source:RefSeq\_peptid;Acc:NP\_060882]

AGAGTTCCTACCCCTTCTTACCTCCATAACAAACTGATGTGTCTTCCACTTTTTGGTTTCTGGTGTAACTCTTGCAGAT  
TCCCCGTTTTTTTTTTTTTTT

In100 candidate1671 (in intron):

LOCUS ENSG000000080709

DESCRIPTION Small conductance calcium-activated potassium channel protein

2(SK2). [Source:Uniprot/SWISSPROT;Acc:Q9H2S1]

GTACCACCTGATTTTAATGATTAAGTTATGTTTTAAATTTATGTGGCTGCTTCTCCCTTGTTACTCTTCCTTTTCAGAA  
TTTTCCTGGCTATTCTACTT

In100 candidate1672 (in intron):

LOCUS ENSG00000171045

DESCRIPTION t-SNARE domain-containing protein 1.

[Source:Uniprot/SWISSPROT;cc:Q96NA8]



GTGGCCTCTATGCTCTTGTGTCTGCTTGCTCTGCTGACCGCGCTGCCTGTAACTGTGGATTTGTGTGTTTCTTTCCAGTT  
CTATCAGTTTTTTGCTTCACG

In100 candidate1673 (in intron):

LOCUS ENSG00000164073

DESCRIPTION major facilitator superfamily domain containing 8

[Source:RefSeq\_peptide;Acc:NP\_689991]

TGACATTTCTCTATCCTGGCTTTCCTCTTAACTCTAATGACTTATTCTTAAATCTTTTGTGTATTCTTCCTTATCAGTT  
TATCCCTTGTTGGTTTTTCT

In100 candidate1674 (in intron):

LOCUS ENSG00000173389

DESCRIPTION IQ motif containing F1 [Source:RefSeq\_peptide;Acc:NP\_689610]

ACATATTGACATACTGATTCTTTGAAGAGAAATTTAGAACTCATACCTAACAACTTCTCCTCTTGCATTTCTTACAGCT  
CTTTCTCTTTAACTTCTTT

In100 candidate1675 (in intron):

LOCUS ENSG00000154438

DESCRIPTION Ankyrin repeat, SAM and basic leucine zipper domain-containing

rotein 1 (Germ cell-specific ankyrin, SAM and basic leucine zipper

domainontaining

protein) (Ankyrin-like protein 1).

[Source:Uniprot/SWISSPROT;Acc:8WWH4]

TTTGTTCCTTAACACTCTTTTCTTCCTTTATCTTCTCCATATTCACACTGGGTATTTTCTTTTGGTCTATCTTCCAGGCC  
ATTAATTCTCTTCTGTAGCT

In100 candidate1676 (in intron):

LOCUS ENSG00000154438

DESCRIPTION Ankyrin repeat, SAM and basic leucine zipper domain-containing  
rotein 1 (Germ cell-specific ankyrin, SAM and basic leucine zipper  
domainontaining  
protein) (Ankyrin-like protein 1).

[Source:Uniprot/SWISSPROT;Acc:8WWH4]

ATCTTTTCTCCTTTGAATCCATCCCTTTCATTGCCATTCATAACAACCTCTTAACACTGATTTTCTTCTACTTCTCAGGC  
TACGTTTCCTTTAGTGGCTT

In100 candidate1677 (in intron):

LOCUS ENSG00000125875

DESCRIPTION TBC1 domain family member 20.

[Source:Uniprot/SWISSPROT;Acc:Q96Z9]

GTGTGTATACACATTTAGTTTTATTGTAACAAGGCAACTCGTACACTTTTTTTTTTCCTTTTTCTTGTATAAGCAGGTG  
AATCCATGTTCTTTCTGCCT

In100 candidate1678 (in intron):

LOCUS ENSG00000001626

DESCRIPTION Cystic fibrosis transmembrane conductance regulator (CFTR)  
(cAMdependent

chloride channel) (ATP-binding cassette transporter sub- familyC  
member 7). [Source:Uniprot/SWISSPROT;Acc:P13569]

CATTGAATGTATTTGGGCCTGCATATGTCTAACATGAAAATTATAGTCCTTTTTTTGTTTCTTTGTTTGTATTTACAGTT  
TTAAGTTCCATTTTCAACCT

In100 candidate1679 (in intron):

LOCUS ENSG00000130193

DESCRIPTION mesenchymal stem cell protein DSCD75

[Source:RefSeq\_peptide;AccNP\_057731]

TTTCTTACAACCTTTCACAATCTTCAACATGTCTTAACTTTCTGCCTGCCTTTTACGCTATTTCTTTTTCTCAGTTTCACC  
CTCTATGTCTTCCTTTGATT

In100 candidate1680 (in intron):

LOCUS ENSG00000083535

DESCRIPTION Progesterone-induced-blocking factor 1.

[Source:Uniprot/SWISSPRT;Acc:Q8WXW3]

ACAACAAATAAAAAGCTGAGCTGGAAAATCATTAACCTTTCTTTTTTTTTTTTTTTTTTTTTTTTTTTTTTTTGAGACAGAG  
TTTTTCACTCTTTGTTGTCC

In100 candidate1681 (in intron):

LOCUS ENSG00000128534

DESCRIPTION U6 snRNA-associated Sm-like protein LSm8.

[Source:Uniprot/SWISSROT;Acc:O95777]

GGCTACTGAACTTTCTCTATTTTCTAACCTTACCTAGTTTCTTTAAATAATTTGATCCCTTATTTTCCATTCTTCAGTT  
TTGCTTTTGTTTCATTTTCTT

In100 candidate1682 (in intron):

LOCUS ENSG00000123338

DESCRIPTION Nck-associated protein 1-like (Membrane-associated protein HEM-)  
(Hematopoietic protein 1). [Source:Uniprot/SWISSPROT;Acc:P55160]

CCACCTCGGCCTCCCAAAGGCTGGACTGTGCCGGCCTATTTTAACTTTTGGAGGAAGTGCCTATACTGTTTTCCACAGTG

GCTGTACTCTTTTACATTCT

In100 candidate1683 (in intron):

LOCUS ENSG00000072736

DESCRIPTION Nuclear factor of activated T-cells, cytoplasmic 3 (NF-ATc3)  
(NATc3) (T cell transcription factor NFAT4) (NF-AT4) (NFATx).

[Source:UniprotSWISSPROT;Acc:Q12968]

ACTGATGTCTCTTCTAACCTCTTAACTCATTCTTCTTTTTCTCCCTAATCCTAAACTTTGGAGTTCCTTGTGCCTCAGTT  
GCCTACTTTCTTCTCTATTT

In100 candidate1684 (in intron):

LOCUS ENSG00000118922

DESCRIPTION Krueppel-like factor 12 (Transcriptional repressor AP-2rep).

[Source:Uniprot/SWISSPROT;Acc:Q9Y4X4]

AATGGACTCAAATTGTGTGCACTTTTGTAAGTGGTTTAATTTTATTTACATTGCGTTTTTTTTTTTCCATGTACCAGTT  
GTTTGTTCTCATTGTTTTAT

In100 candidate1685 (in exon):

LOCUS ENSG00000189184

DESCRIPTION Protocadherin-18 precursor. [Source:Uniprot/SWISSPROT;Acc:Q9HCL]



(AS160).[Source:Uniprot/SWISSPROT;Acc:O60343]

GATATAAACATAGGGCCCTTAACAATTGGTTCCTCTTCAATATGTATTCCTTCATGTTTCAGTCTAGTCTTGATGTCCTT  
CACAGCTCAGTGTTTTTTTTT

In100 candidate1690 (in intron):

LOCUS ENSG00000136111

DESCRIPTION TBC1 domain family member 4 (Akt substrate of 160 kDa)

(AS160).[Source:Uniprot/SWISSPROT;Acc:O60343]

TGGAGTACTAAGCTGATGTATAGCAACGACGCTTAACAAGAAAAGCCCTTGAGATGTCCTCTTCCCTATTTCTGTCAGTT  
TCTCATTCTGCTTTATAAAT

In100 candidate1691 (in intron):

LOCUS ENSG00000136111

DESCRIPTION TBC1 domain family member 4 (Akt substrate of 160 kDa)

(AS160).[Source:Uniprot/SWISSPROT;Acc:O60343]

CACATGCTTTTTTTGTGGTGAACATCTAGAATCACTGCTAACAACCACTGCAAATAACTGTCCTCTGCTTTATTCCAGTT  
TCTACATGTTGCTTTTATCA

In100 candidate1692 (in intron):

LOCUS ENSG00000169570

DESCRIPTION DTW domain-containing protein 2.

[Source:Uniprot/SWISSPROT;Acc:8NBA8]

CAAGTTTGAATAGTTTCTTCTTCTAACTCCTCACTTTGTCTTTTTTCTCTACTATATTGTTAGCTTCCTGTGGGTCAGCC  
TCTTCGTATTTCTTACGGTA

In100 candidate1693 (in intron):

LOCUS ENSG00000160551

DESCRIPTION Serine/threonine-protein kinase TAO1 (EC 2.7.11.1) (Thousand an  
one amino acid protein 1) (STE20-like kinase PSK2) (Kinase from chicken hoolog  
B) (hKFC-B). [Source:Uniprot/SWISSPROT;Acc:Q7L7X3]

TGGAGTTTTTTAAAAATTGTTGAATTTGAACAAGTTAAAAGAAAATAGCTAACACTTACTGTAGTGCTTATTACTCCAGAG  
TATTACTCTATGCTTTCATT

In100 candidate1694 (in intron):

LOCUS ENSG00000172869

DESCRIPTION Protein DmX-like 1 (X-like 1 protein).

[Source:Uniprot/SWISSPRO;Acc:Q9Y485]

GGTAACATCTCCTTGGTCATTTCTAATTGTGTTTATTTGTATCTTCTCTCTTTTCTTTTTTATTAGTCTAGCTGGCAGTC  
TGTCTGTCTTACTAATTTTT

In100 candidate1695 (in intron):

LOCUS ENSG00000186714

DESCRIPTION sarcoma antigen NY-SAR-79 [Source:RefSeq\_peptide;Acc:NP\_00100832]

AGATTTTCTCCCACTCTGTGGGTGTCTGTAACTCTGCTGATTATTTCTTTTGCTGTGCAGAATCTTTTAGTTTAATT  
AAGTCCCATCTATTCATCTT

In100 candidate1696 (in intron):

LOCUS ENSG00000014164

DESCRIPTION Zinc finger CCCH domain-containing protein 3.

[Source:Uniprot/SISSPROT;Acc:Q8IXZ2]

GTTGTTGAGAGAGGTGCTGAAGTCTCTAACTATAATTGTGGATTTGTCTGTTTCTCCTTTCATAGCTAACAGTTATTGCT  
TCATGTATTTTACAGCTTTT

In100 candidate1697 (in intron):

LOCUS ENSG00000118939

DESCRIPTION Ubiquitin carboxyl-terminal hydrolase isozyme L3 (EC  
3.4.19.12)(UCH- L3) (Ubiquitin thioesterase L3).

[Source:Uniprot/SWISSPROT;Acc:P15374]

TGTCTTTCTAACTTTAATTATTTCTTTTCTAGCCATCCCTTATTTCTTATTTTATTATTTCTATTCTTCTTGCAGTACTC  
TCTTTCTGAAAATATTCTTT

In100 candidate1698 (in intron):

LOCUS ENSG00000118939

DESCRIPTION Ubiquitin carboxyl-terminal hydrolase isozyme L3 (EC  
3.4.19.12)(UCH- L3) (Ubiquitin thioesterase L3).

[Source:Uniprot/SWISSPROT;Acc:P15374]

AGGTGTGAGCCACTAACAAAACACTTGACTTCTTCTTAGGCAGACCCTCTGCTTTGTTTGATTTTTTTTTTTTTTTAAG  
TCTGGATCATTTCTTTTCTAG



In100 candidate1699 (in intron):

LOCUS ENSG00000198720

DESCRIPTION Ankyrin repeat domain-containing protein 13B.

[Source:Uniprot/SISSPROT;Acc:Q86YJ7]

CACTGTGCCTGGCCTCCTGACATTCTTATACATTTAACATTTTTTGGCACTCTTCAATCCTTTGTACAGATTCAAGTTTC  
TATCTGGGATCATTTTCTTT

In100 candidate1700 (in intron):

LOCUS ENSG00000081803

DESCRIPTION Calcium-dependent secretion activator 2 (Calcium-dependent  
actiator protein for secretion 2) (CAPS-2). [Source:Uniprot/SWISSPROT;Acc:Q86UW]  
AACATTGGATCTGGTATAGCAAGTTACCATCATTTAATATGTAACCTGAATTTCTCTTTTACTTTTTTCAGTTTTT  
ACTATTTTTTTGTTTCTTTAT

In100 candidate1701 (in intron):

LOCUS ENSG00000081803

DESCRIPTION Calcium-dependent secretion activator 2 (Calcium-dependent  
actiator protein for secretion 2) (CAPS-2). [Source:Uniprot/SWISSPROT;Acc:Q86UW]  
TGTCTAACGTTTCGCTGCAATATATTTTGAATTTTTTTTGTATTTTCATTATTACCCATGGATTTTTTTTTTTCCTCCAGGT  
CTATTGCTATTGTGTTTCTG

In100 candidate1702 (in intron):

LOCUS ENSG00000184838

DESCRIPTION mesenchymal stem cell protein DSC54

[Source:RefSeq\_peptide;Acc:P\_057728]

AGCAATCATTAGATCTGGTTAACCCCTAGACGGTGTTTCATCTCTCATTGCTTTTTTTAAATTCCTGCCATGATCCAGGT

TCTATTTGTATTTTGACCTT

In100 candidate1703 (in intron):

LOCUS ENSG00000184838

DESCRIPTION mesenchymal stem cell protein DSC54

[Source:RefSeq\_peptide;Acc:P\_057728]

AATATAAAAGATGTCTGGATAATGTCAAATATTAGAGATATATTAACATGTTTACAATTACTGTTTTTCTTTAATCAGTT

GCATTCTTTTGTCATGCATT

In100 candidate1704 (in intron):

LOCUS ENSG00000184838

DESCRIPTION mesenchymal stem cell protein DSC54

[Source:RefSeq\_peptide;Acc:P\_057728]

TAACTTTTGTATTACTTCTCACTTCCACTTTTTCTGTATTCCACTTTCAAATTTGAAATCCTTCTGGGACTTCATCAGTA

CTTTTCCACCTTTTTATTA

In100 candidate1705 (in intron):

LOCUS ENSG00000184838

DESCRIPTION mesenchymal stem cell protein DSC54

[Source:RefSeq\_peptide;Acc:P\_057728]

TTATGTTTTGTAATCAATGCATAACTTGACTTACTTGTTTACCAATGCCTTTGTTTATCTATGCTTCTTGCATTCCAGTT  
CTTCCTTCTGATTATTTACC

In100 candidate1706 (in intron):

LOCUS ENSG00000110422

DESCRIPTION Homeodomain-interacting protein kinase 3 (EC 2.7.11.1) (Homolog of  
protein kinase YAK1) (Fas-interacting serine/threonine-protein kinase) (IST)  
(Androgen receptor-interacting nuclear protein kinase) (ANPK).

[Source:Uniprot/SWISSPROT;Acc:Q9H422]

CTGGTAATAAAAAATGCCACATCATTGTAGTGTTAGGAATAATAGATGCTAACAATATAATGCTGTTGTGTTTTTCAGTT  
TTTTCCCCCAAGTGTTTATT

In100 candidate1707 (in intron):

LOCUS ENSG00000136153

DESCRIPTION LIM domain only protein 7 (LOMP) (F-box only protein 20).

[Source:Uniprot/SWISSPROT;Acc:Q8WWI1]

TAGGTATTTTTTTAAACTATTAACATTTTATCTGTACCCATTTTATTGCAGACTTGGGTTTCAATGCAGGTATGGGTTC  
TTTGTCTCTTCTCTCTCCC

In100 candidate1708 (in intron):

LOCUS ENSG00000136153

DESCRIPTION LIM domain only protein 7 (LOMP) (F-box only protein 20).

[Source:Uniprot/SWISSPROT;Acc:Q8WWI1]

AAAATTCAAGTGTGTTTTGGACCACTTGAAGTCAAATAAGTCAAATTTATAACAAAGGATTTCTCTCTAGTCTGTCAGTT  
ACCACTACTTTTTCTTTTTC

In100 candidate1709 (in intron):

LOCUS ENSG00000136153

DESCRIPTION LIM domain only protein 7 (LOMP) (F-box only protein 20).

[Source:Uniprot/SWISSPROT;Acc:Q8WWI1]

GCTGATCTTGCTATTTTTCTGTTAATGGGTCCGTAACCTATAACCACATTATTATCTTTCTCAGTTCCCAATTTATCACGT  
ACTTTTCTGATCTGGTTCCT

In100 candidate1710 (in intron):

LOCUS ENSG00000141298

DESCRIPTION Protein phosphatase Slingshot homolog 2 (EC 3.1.3.48) (EC  
3.1.316) (SSH-2L) (hSSH-2L). [Source:Uniprot/SWISSPROT;Acc:Q76I76]

CTGAAATATTTATAAGAATGAAAGCTGCAACATCTTAAGTAGTGTAATTTGGTTTAATTTTTACTTTTCTCTCTTCAGGT  
CTGTTTTGTTTTGTTTTTGG

In100 candidate1711 (in intron):

LOCUS ENSG00000141298

DESCRIPTION Protein phosphatase Slingshot homolog 2 (EC 3.1.3.48) (EC  
3.1.316) (SSH-2L) (hSSH-2L). [Source:Uniprot/SWISSPROT;Acc:Q76I76]

CTACTTCACAAATTTTAAAAAGTAGAGTTTATATAAACCGAATCATAACACATTTCAAACTGTATTGTTTTTTACAGAT  
TTGATTGTTTTCTATAATTT

In100 candidate1712 (in intron):

LOCUS ENSG00000176927

DESCRIPTION EF-hand calcium binding domain 5 isoform 2

[Source:RefSeq\_peptie;Acc:NP\_001028734]

AAATACTTTTTCCCTCCTCTTCCATGATATCATACTTGTCTAACTTTCCTTCTGTTTCTCTATTTAGTCCTTCTCAGTGT  
CCTTTTCTGGCTCATTCTCT

In100 candidate1713 (in intron):

LOCUS ENSG00000164675

DESCRIPTION IQ and ubiquitin-like domain-containing protein.

[Source:Unipro/SWISSPROT;Acc:Q8NA54]

TATATGTTGACATTTTAACTGTTTTTCATTTTATACTTTTATCTCTTATGTTTTTTTTTGCTGCTTTTGGGACAGTT  
TCTTCATATGTATCTTTTGTG

In100 candidate1714 (in intron):

LOCUS ENSG00000181135

DESCRIPTION Zinc finger protein 707. [Source:Uniprot/SWISSPROT;Acc:Q96C28]

EXON

AGTGTGCCTTTTCATGTTTTTATAGACCGTTGTATAACTTTGGTTGAAGTGTCTGTTCTAATATTTTGCCCAGTTTAAAT  
TTTATTTCTCTTTTTTATTG

In100 candidate1715 (in intron):

LOCUS ENSG00000205302

DESCRIPTION Sorting nexin-2 (Transformation-related gene 9 protein) (TRG-9)

[Source:Uniprot/SWISSPROT;Acc:O60749]

AGTTCTAACATTTTGTTTTCTTCTTTTGTAGCAGCTTCTTTTTTGCAGCAGCTTCTGTTTCTTTGCTGAGAGC  
TGTCATTTCACTCACTTCAA

In100 candidate1716 (in intron):

LOCUS ENSG00000170153

DESCRIPTION ring finger protein 150 [Source:RefSeq\_peptide;Acc:NP\_065775]

TAACATAGTCTTGTTTTTTCTGCTATTCATTTTATTCCCTTTCACCTTACACCCACCATTATTTATTCTTTCCAGACT  
TTCAACTCATACTTTTAT

In100 candidate1717 (in intron):

LOCUS ENSG00000170153

DESCRIPTION ring finger protein 150 [Source:RefSeq\_peptide;Acc:NP\_065775]

GTACATTAAACCTTCTCATCCCCTGTCCTCTGTATCTCTTAACCTCTTTTGCATATTTTCTATCTCCAGGTCTCTGTGCT  
GCATTCTGAGTAATTTCTCC

In100 candidate1718 (in intron):

LOCUS ENSG00000170153

DESCRIPTION ring finger protein 150 [Source:RefSeq\_peptide;Acc:NP\_065775]

ACAATTTAGTCTAGTTATTGAGGTTATTTAATTGAATAACTGATTGAATGACTATATTCATCATTTTCAGGTACAATTTGG  
TTATTTGTTTTTCATCTGCCT

In100 candidate1719 (in intron):

LOCUS ENSG00000135363

DESCRIPTION Rhombotin-2 (LIM domain only protein 2) (Cysteine-rich protein TG-2) (T-cell translocation protein 2). [Source:Uniprot/SWISSPROT;Acc:P2579]  
TGGAAACATTTCTCTAACTGAAGATAAGAATTTTTTTTCTCTCTCTTCTCCTTTCTACTTCTAGCTGTCTAAACCAGAG  
GGTTCCTCTCATTTTCTTTC

In100 candidate1720 (in intron):

LOCUS ENSG00000168807

DESCRIPTION Beta-2-syntrophin (59 kDa dystrophin-associated protein A1 basi component 2) (Syntrophin 3) (SNT3) (Syntrophin-like) (SNTL).  
[Source:Uniprt/SWISSPROT;Acc:Q13425]

GTATTAACCTTTGGATTTTGCCTTTCTTTTCCATTTAAACAGTTTCCATAAACCTCCCTTTCCCTTTTTTATTGCAG  
TGGGAATCCATTGCTTGTTT

In100 candidate1721 (in intron):

LOCUS ENSG00000108582

DESCRIPTION Carboxypeptidase D precursor (EC 3.4.17.22)  
(Metallo-carboxypeptidase D) (gp180). [Source:Uniprot/SWISSPROT;Acc:075976]  
TCTATCTCTGTGAATTTGCCATTTTAGATATTTTATATAACTGGAGTTATACAATATTCCTTCCTTTTGCATCAGGCTTA  
TTTTTCTTAACATAATATTC

In100 candidate1722 (in intron):

LOCUS ENSG00000108582

DESCRIPTION Carboxypeptidase D precursor (EC 3.4.17.22)  
(Metallo-carboxypeptidase D) (gp180). [Source:Uniprot/SWISSPROT;Acc:075976]  
AGTGATAACAATAGTAGGCCTTTTGCTATTGTTCTTAAATTTTTTCTTCTTTTTTTTCAGATCTTTTTTTCTTCTTCT  
CTGTTATTCATAAGGCAATT

In100 candidate1723 (in intron):

LOCUS ENSG00000109445

DESCRIPTION Zinc finger protein 330 (Nucleolar cysteine-rich protein)

(Nucleolar autoantigen 36). [Source:Uniprot/SWISSPROT;Acc:Q9Y3S2]

GGTGCCTTAGTGGTCTGGGCGTTACGTTACCGAAATAACCACCTATTAAATCTGGCTATTTTTCAGTTGCTACCGTACTG  
CTTACCACCTGTTTTGTTTT

In100 candidate1724 (in intron):

LOCUS ENSG00000064652

DESCRIPTION Sorting nexin-24. [Source:Uniprot/SWISSPROT;Acc:Q9Y343]

CTGAATTATTTAATTATCTATCATAGTAGGAAAATGTCATCTCATAGTAACTGAGAATTAATTTTAGTTTCACTCAGGTG  
GGGTCTTTTACCACCTTCCT

In100 candidate1725 (in intron):

LOCUS ENSG00000064652

DESCRIPTION Sorting nexin-24. [Source:Uniprot/SWISSPROT;Acc:Q9Y343]

CACTTTCTCCCTTTTATTTTATGTACTTTTACATAACATTTTATGTATTTTACATTTTCCACATGCAGTCATCAGC  
TTATCCTGTTGGTTCTACTT

In100 candidate1726 (in intron):

LOCUS ENSG00000108587



DESCRIPTION Golgi SNAP receptor complex member 1 (28 kDa Golgi SNARE protei)  
(28 kDa cis-Golgi SNARE p28) (GOS-28). [Source:Uniprot/SWISSPROT;Acc:O9529]  
TGATGTTAAGCCTTCCTTCAAGTGCTTATTAACCATTACGTATCTTCTTTTTATTATTACAACTCACAGGTTATTGT  
GACATTTGTATATCTTCTTT

In100 candidate1727 (in intron):

LOCUS ENSG00000108587

DESCRIPTION Golgi SNAP receptor complex member 1 (28 kDa Golgi SNARE protei)  
(28 kDa cis-Golgi SNARE p28) (GOS-28). [Source:Uniprot/SWISSPROT;Acc:O9529]  
AAGTCCTATATACCCTTTACCCAACTTCTACAAAGTTTAACATACATTGATGCTCTTTACTCCTAAATATTTTCAGTGTTT  
GTTTCCTAAATATCTGTTTC

In100 candidate1728 (in intron):

LOCUS ENSG00000108587

DESCRIPTION Golgi SNAP receptor complex member 1 (28 kDa Golgi SNARE protei)  
(28 kDa cis-Golgi SNARE p28) (GOS-28). [Source:Uniprot/SWISSPROT;Acc:O9529]  
TCTTTTTGTTTAACATTCTGGGAGATTTACTGAATTTCTCCTTCCAATTCTTCTATTACATTTTTATATCAGCTCTTCAT  
TTAATTTACATGAGCTCTTT

In100 candidate1729 (in intron):

LOCUS ENSG00000168944

DESCRIPTION coiled-coil domain containing 100  
[Source:RefSeq\_peptide;Acc:NP694955]  
CTTGTTTCTTATTCCTGTTTTTGTCTGTAACCTTTTTCCCACATTTGTGGTTTTAATTTTCTCTTTCTTGCATATCAGTT  
ATACTTTTTTGTTTTTTGTT

In100 candidate1730 (in intron):

LOCUS ENSG00000109452

DESCRIPTION Type II inositol-3,4-bisphosphate 4-phosphatase (EC 3.1.3.66)  
(inositol polyphosphate 4-phosphatase type II).

[Source:Uniprot/SWISSPROT;Acc:O15327]

ATCTGTTTAATATTCCGGCCAATATTTTACACATTATATGTAACAAAATTAAAGCACATTTGGTTACTTTTCTCCCAGTT  
CTTCTATGATTCACTCTGTA

In100 candidate1731 (in intron):

LOCUS ENSG00000178734

DESCRIPTION CDNA FLJ35379 fis, clone SKMUS2006481.

[Source:Uniprot/SPTREMBLAcc:Q8NAG9]

ACCAAACCTCTGAACATGACTTTGCTTAACTTTTATTTTCTATTTTATTAATTTAATCACCTTGTATTTTGCCTCTCAGAT  
CTCTTGTTTCATGTGTTTAC

In100 candidate1732 (in intron):

LOCUS ENSG00000128513

DESCRIPTION Protection of telomeres 1 (hPot1) (POT1-like telomere end-binding  
protein). [Source:Uniprot/SWISSPROT;Acc:Q9NUX5]

ATCTTTTTTTTCTTATTGATTCTCTTTAACTTTAAATAATATATTTGTCTTTCATTTCTTATTCGTCAACTTTATTCAGTG  
TTGTTGTTTACTTTCTTCTC

In100 candidate1733 (in intron):

LOCUS ENSG00000128513

DESCRIPTION Protection of telomeres 1 (hPot1) (POT1-like telomere end-binding protein). [Source:Uniprot/SWISSPROT;Acc:Q9NUX5]

CTTCTGTAACCATACATATTTCTTCCATTCTTTGGCTATCTCTATGCTACATTTTAGTTTTCTTCATATTTGGATCAGAT  
ATTCCTGTATAGCCTTTTAT

In100 candidate1734 (in intron):

LOCUS ENSG00000128513

DESCRIPTION Protection of telomeres 1 (hPot1) (POT1-like telomere end-binding protein). [Source:Uniprot/SWISSPROT;Acc:Q9NUX5]

AACATCACAACAATTACGTATCCACCATTTAGATTTAACAATCGTAACGTTTTGACATTATTCAGACTTTTTTTTTTTT  
TTTTTTTTTTTTGGAGACAGT

In100 candidate1735 (in intron):

LOCUS ENSG00000197522

DESCRIPTION SUZ12P protein. [Source:Uniprot/SPTREMBL;Acc:Q86WX1]

ACTTAATGATGCATCATTTATGCATCTCATTGTTTTCCCATTTGTTCTGTAACTGGTAAAAGACTTCCTTTTTTTCAGTT  
TGGCTTCCTTCTACTTTAAG

In100 candidate1736 (in intron):

LOCUS ENSG00000151292

DESCRIPTION Casein kinase I isoform gamma-3 (EC 2.7.11.1) (CKI-gamma 3).  
[Source:Uniprot/SWISSPROT;Acc:Q9Y6M4]

TAAATTGCATCTTATACTTCTTCTCTGTGCCACCATTTGACACGTAAGTAGGGACCTGCTTAGAATTTTCTTTCAGAA  
TTTCTTTTTTCATCTTTCTTC

In100 candidate1737 (in intron):

LOCUS ENSG00000179603

DESCRIPTION Metabotropic glutamate receptor 8 precursor (mGluR8).

[Source:Uiprot/SWISSPROT;Acc:O00222]

CTATATATAAGAATGTGCATCCATTCAAGTAACTTTGGATGTCTTGTTTATTTCATTTTCTTCTCTTCCCCAAGCCAGTG  
ATTTTTCACTTCTTTTTTAAA

In100 candidate1738 (in intron):

LOCUS ENSG00000179603

DESCRIPTION Metabotropic glutamate receptor 8 precursor (mGluR8).

[Source:Uiprot/SWISSPROT;Acc:O00222]

AGGGAGAACGTGTACTGGGGATGCTGTATGGGCCAAAAATAACTCGGGGCTTTTTTTAATGCTTTTTTCCAACCAGATCCA  
CTTTTTCTTGATTACTGTAG

In100 candidate1739 (in intron):

LOCUS ENSG00000179603

DESCRIPTION Metabotropic glutamate receptor 8 precursor (mGluR8).

[Source:Uiprot/SWISSPROT;Acc:O00222]

CTTTTTTTGTCTTCTCTGAAATTATTTTAACTGATCAAGTTTTCTCTCATTTTTTTTCATTTGATAGTTCAGGAGTTTTA  
GATACTATTTTCATTTTTTT

In100 candidate1740 (in intron):

LOCUS ENSG00000176208

DESCRIPTION chromosome fragility associated gene 1

[Source:RefSeq\_peptide;Ac:NP\_079133]

CATTTT TAGAGTTACATTA ACTTAACTTTCTATAAAATTTCTTTTTTTTTTAATTTTTTTTTTTTTTTGGAGACAGAGT  
CTTGCTCTGTTTCCCATAGT

In100 candidate1741 (in intron):

LOCUS ENSG00000176208

DESCRIPTION chromosome fragility associated gene 1

[Source:RefSeq\_peptide;Ac:NP\_079133]

TTTTCTATATGAGTATATATATATATAGGTATATAGTATTCTTATGTA ACTATAACGTACAATCACTTTTAGCTTCAGGA  
GTCTTTAAATTCTGTCTTTC

In100 candidate1742 (in intron):

LOCUS ENSG00000109458

DESCRIPTION GRB2-associated-binding protein 1 (GRB2-associated binder 1).

[Source:Uniprot/SWISSPROT;Acc:Q13480]

TTGTCCAATGTTTCTTAACCTTTTCTAACCCACTCCTCTCTCATGTATTGTTTGAGTGTCCTTTGGCTTTTAATCCAGTT  
TTACTTTCTATGATTTGCAT

In100 candidate1743 (in intron):

LOCUS ENSG00000121691

DESCRIPTION Catalase (EC 1.11.1.6). [Source:Uniprot/SWISSPROT;Acc:P04040]

CACTGCTTAGAATGCCATGGGCTCTTCTTTTGAGATACTTACCTTTAACCCATTTCTTTTTTTTTTTTTTAAGTGCAGCT  
TGCTGCCAGTGCTCTTTTCT

In100 candidate1744 (in intron):

LOCUS ENSG00000102908

DESCRIPTION Nuclear factor of activated T-cells 5 (T-cell transcription factor NFAT5) (NF-AT5) (Tonicity-responsive enhancer-binding protein) (TonE-binding protein) (TonEBP). [Source:Uniprot/SWISSPROT;Acc:O94916]

AACTGAGTTACCTAATAACCTGAGATGAAAATACTCTTTTTGTTTCAGGTTTGCTTTTATAGTTTCTCCTTCCTTTTCCCC  
AGTCTGTCTGCTAAATAGCC

In100 candidate1745 (in intron):

LOCUS ENSG00000155324

DESCRIPTION GRAM domain-containing protein 3 (HCV NS3-transactivated protein 2). [Source:Uniprot/SWISSPROT;Acc:Q96HH9]

CTCTCAACTTCCTGTTTTGATGGAAAAGAATCAACTCCCTTATACTAACTCCCTCCTTCCTCTCTTCCTTTTAACAGGC  
GTATCTTTCTAGTTCCTATT

In100 candidate1746 (in exon):

LOCUS ENSG00000155324

DESCRIPTION GRAM domain-containing protein 3 (HCV NS3-transactivated protein 2). [Source:Uniprot/SWISSPROT;Acc:Q96HH9]

CTTCAAACAAGTAACATCTACATTTTGTCTTTTTTTTTTTCAGTTCTCCTGTTATGTTCTGGTTGAAATCACCTGTGTGTC  
TTAATTTCTCAATTCCTTTT

In100 candidate1747 (in exon):

LOCUS ENSG00000181019

DESCRIPTION NAD(P)H dehydrogenase [quinone] 1 (EC 1.6.5.2) (Quinone reductase 1) (NAD(P)H:quinone oxidoreductase 1) (QR1) (DT-diaphorase) (DTD) (Azoreductase) (Phylloquinone reductase) (Menadione reductase).

[Source:Uniprot/SWISPROT;Acc:P15559]

AGATCAAAGCTAGAAAATGAGATTCCTTAGCCTGGATTTCCTTCTAACATGTTATCAAATCTGGGTATCTTTCCAGGCTT  
CCCTGACTTGCTTTAGTTTT

In100 candidate1748 (in intron):

LOCUS ENSG00000183090

DESCRIPTION FRAS1-related extracellular matrix protein 3 precursor.

[SourceUniprot/SWISSPROT;Acc:P0C091]

TTTTCAAAGATAATATCTTTGAAAAAATATATTTTTTGTTTTATTTAACTTTTGTATTTTTTGTGTTGTTTGTTCAGTT  
TCACTTAGTTCTGCTCTGAT

In100 candidate1749 (in intron):

LOCUS ENSG00000197157

DESCRIPTION Staphylococcal nuclease domain-containing protein 1 (p100 coactivator)

(100 kDa coactivator) (EBNA2 coactivator p100).

[Source:Uniprot/SWSSPROT;Acc:Q7KZF4]

ACATGTTAACCCCCACCCCCATTTTATTCTTGCTTCAGGAATTTTGTCTCTGTTTTCTCCTTGTAAGTCTTTTGCCA  
TCCCCATTGTTGTAGAAGCC

In100 candidate1750 (in intron):

LOCUS ENSG00000197157

DESCRIPTION Staphylococcal nuclease domain-containing protein 1 (p100  
coactivator)

(100 kDa coactivator) (EBNA2 coactivator p100).

[Source:Uniprot/SWSSPROT;Acc:Q7KZF4]

CTCCCTCAACACTTTTGTCTTAAAAAGAAATATAAGTTTATAGAATAACATAACAAACATCTGGGTCCTTTTTCAGCC  
TTGATATTCTTCCCTGTGTG

In100 candidate1751 (in intron):

LOCUS ENSG00000197157

DESCRIPTION Staphylococcal nuclease domain-containing protein 1 (p100  
coactivator)

(100 kDa coactivator) (EBNA2 coactivator p100).

[Source:Uniprot/SWSSPROT;Acc:Q7KZF4]

AGTTCTTTTGTTCCTTGGGATTTTGTGCTATTGGCTATTCTCTTTTAACTAGTGTTATTTTAAATTGTCCTTCAGTC  
TTCTATCCTATTATATCTGC

In100 candidate1752 (in intron):

LOCUS ENSG00000197157

DESCRIPTION Staphylococcal nuclease domain-containing protein 1 (p100  
coactivator)

(100 kDa coactivator) (EBNA2 coactivator p100).

[Source:Uniprot/SWSSPROT;Acc:Q7KZF4]

TTGTTAACTAATAGGTTTAGTCTATTCCCATTTTCCCATGCTGTTTTCTGTGCTGTTATGTTTACCTCTCACCAGCCCTT  
TCTAGTTTCATGCCTACTAT



In100 candidate1753 (in intron):

LOCUS ENSG00000110435

DESCRIPTION Pyruvate dehydrogenase protein X component, mitochondrial precursor (Dihydrolipoamide dehydrogenase-binding protein of pyruvate dehydrogenase complex) (Lipoyl-containing pyruvate dehydrogenase complex component X) (3-binding protein) (E3BP) (proX).

[Source:Uniprot/SWISSPROT;Acc:O00330]

ACCACACTTTTAATTAGAAATGTTTTATTGTATGCTTTAAAATCTGATAACAATAGCTTTGCTCTTTTTTTAAATCAGTT  
TTCTTAGTTCATTCTTATTT

In100 candidate1754 (in intron):

LOCUS ENSG00000110435

DESCRIPTION Pyruvate dehydrogenase protein X component, mitochondrial precursor (Dihydrolipoamide dehydrogenase-binding protein of pyruvate dehydrogenase complex) (Lipoyl-containing pyruvate dehydrogenase complex component X) (3-binding protein) (E3BP) (proX).

[Source:Uniprot/SWISSPROT;Acc:O00330]

TATTAAGTTATCTAGTATTTCTGTGATACTGATCTCATTTGATTTCTGTTCTTTATTTTTTTTTTCTCTTTGCTTTCAGTT  
TACTTTGCTCTTTTATTTCT

In100 candidate1755 (in intron):

LOCUS ENSG00000005810

DESCRIPTION Probable E3 ubiquitin-protein ligase MYCBP2 (EC 6.3.2.-) (Mycbinding protein 2) (Protein associated with Myc) (Pam/highwire/rpm-1 protein)

[Source:Uniprot/SWISSPROT;Acc:O75592]

CTTCTTCATAATTCTTATTTTCACTTAATTTTCATAACCTTTTTGTATTGGATATCTTTTCTGTTTTTTTCTTACCCAGAG  
GATCTTCCCCTCTTTTTTTAA

In100 candidate1756 (in intron):

LOCUS ENSG00000005810

DESCRIPTION Probable E3 ubiquitin-protein ligase MYCBP2 (EC 6.3.2.-) (Mycbinding  
protein 2) (Protein associated with Myc) (Pam/highwire/rpm-1 protein)

[Source:Uniprot/SWISSPROT;Acc:075592]

GTTTTAATTCGTATTTTCCTCCAAGTTTAGTTAAATAACTTTTCTAGTCTTTATTGACCTTTCAGATTCTTCTTCAGAG  
AATTGTCTTGACTGTCTTTT

In100 candidate1757 (in intron):

LOCUS ENSG00000198373

DESCRIPTION NEDD4-like E3 ubiquitin-protein ligase WWP2 (EC 6.3.2.-) (WW  
doain- containing protein 2) (Atrophin-1-interacting protein 2) (AIP2).

[Source:Uniprot/SWISSPROT;Acc:000308]

TTGCATTCTAACTTTGTATGTTTTTAACTTTCTGTAGTCCAATCTGTCACCCTTTATGTTTTTCAGCATTTTCTTTCATGC  
TTTGGAAGGCATTCCCCCTT

In100 candidate1758 (in intron):

LOCUS ENSG00000145794

DESCRIPTION MEGF10 protein [Source:RefSeq\_peptide;Acc:NP\_115822]

AGTATTATATTGGTCTAGACATGTATTCCATATTTCTTCATAACTAGTTTGAAATACTTTGCTTTTCAGACTTTTATTAT  
GTTTAATAGCTAATTTTTCC

In100 candidate1759 (in intron):

LOCUS ENSG00000064651

DESCRIPTION Solute carrier family 12 member 2 (Bumetanide-sensitive sodium-  
(potassium)-chloride cotransporter 1) (Basolateral Na-K-Cl symporter).

[Souce:Uniprot/SWISSPROT;Acc:P55011]

GATGTTTAATGTAATCTACCACATACTTTTTGTTTAATAACAATAAACTTTTTTTTTGTTTTTGCCAGATTTTCTTCTT  
AATCTTGAAAAGTACTTCTT

In100 candidate1760 (in intron):

LOCUS ENSG00000167491

DESCRIPTION Transcriptional repressor p66 alpha (Hp66alpha) (GATA zinc fingr  
domain-containing protein 2A). [Source:Uniprot/SWISSPROT;Acc:Q86YP4]

AGGGTCCATGTATTATTTTAACCGAGTTCATACTTTATTCTGATTTCCCTCAGTTTTTCCAGCTGTCCTTTTCCCTTAC  
GTTATATTTAATCCTTGCGT

In100 candidate1761 (in intron):

LOCUS ENSG00000167491

DESCRIPTION Transcriptional repressor p66 alpha (Hp66alpha) (GATA zinc fingr  
domain-containing protein 2A). [Source:Uniprot/SWISSPROT;Acc:Q86YP4]

AGTGGTAGGACTAACTTGGGGAAGTGAAGTGTGTCCTTTTTCTCTGTACAGGATTTTCTTTTTCTTTTTTTTTTTT  
TCTTTTTTTTTTTTTTTTTTTT

In100 candidate1762 (in intron):

LOCUS ENSG00000164162

DESCRIPTION Anaphase-promoting complex subunit 10 (APC10) (Cyclosome subunit 10). [Source:Uniprot/SWISSPROT;Acc:Q9UM13]

AAATTTGTGACCCATGTGGTAACAATTGTATATATTTATTTCTATACACTAATCTTGGCCCTCAGTTATTTATTTTGTCA  
TATTATGGCATATTTCTTTT

In100 candidate1763 (in intron):

LOCUS ENSG00000110436

DESCRIPTION Excitatory amino acid transporter 2 (Sodium-dependent glutamate/aspartate transporter 2). [Source:Uniprot/SWISSPROT;Acc:P43004]

ATTCCCTTTAAATCACTTCCTGGATATTTGCATAGCACATGTATCCTGATAACTCCCAAATGTATGTTTCTATTTTCAGGC  
CTTTTTTCTAGGTTCTAGAT

In100 candidate1764 (in intron):

LOCUS ENSG00000149090

DESCRIPTION regeneration associated muscle protease isoform b  
[Source:RefSeq\_peptide;Acc:NP\_001001991]

GAGTAGTGTTAGATAACAACATTATCTGTATTCTTTATAAATGTGTTTCTATTGTCTGTATTTCTCTTGATTTTCAGTCT  
TGCCTTCTGTCTTAGTCAGT

In100 candidate1765 (in intron):

LOCUS ENSG00000126858

DESCRIPTION Mitochondrial Rho GTPase 1 (EC 3.6.5.-) (MIRO-1) (hMiro-1)  
(Rashomolog gene family member T1) (Rac-GTP-binding protein-like protein).

[Souce:Uniprot/SWISSPROT;Acc:Q8IXI2]

AGTAGTACATTGAACTTCCCTAAATCCTTCACTTAAATTTACTAGGTAACGTTTTGCCACGTTTGCCTTATCTATCAGTT  
TTTCTGTCTGTTTCATACACA

In100 candidate1766 (in intron):

LOCUS ENSG00000126858

DESCRIPTION Mitochondrial Rho GTPase 1 (EC 3.6.5.-) (MIRO-1) (hMiro-1)  
(Rashomolog gene family member T1) (Rac-GTP-binding protein-like protein).

[Souce:Uniprot/SWISSPROT;Acc:Q8IXI2]

TAAGTCCTTATGTGTCTGACCTTTGATCCTCTTTCTAACCCCATTTTATACCTTTTTCTCTTTACTCAGTACTCTGTAGC  
CATTCTGGCATTTCCTGTT

In100 candidate1767 (in intron):

LOCUS ENSG00000163935

DESCRIPTION Scm-like with four MBT domains protein 1 (Renal ubiquitous protein  
1). [Source:Uniprot/SWISSPROT;Acc:Q9UHH3]

TAAAATAAAATAAAATAAAATAAAATAAAATAACTTCAACCTGATATTACTAATTCTTTCTCTTTTTCCATATATATAGCCAGTT  
TTATTACTTTTTAATTTATT

In100 candidate1768 (in intron):

LOCUS ENSG00000166326

DESCRIPTION Tripartite motif-containing protein 44 (Protein DIPB).

[Source:niprot/SWISSPROT;Acc:Q96DX7]

ACTTTAATGGAAAATCTTATATTTAGTTGCAACAAGTTTATACTTGGTAACAAAAATGGCATGTTTCTTTGCTTACAGTT

AACTGTTTTTCTCCCATGGT

In100 candidate1769 (in intron):

LOCUS ENSG00000170365

DESCRIPTION Mothers against decapentaplegic homolog 1 (SMAD 1) (Mothers  
against DPP homolog 1) (Mad-related protein 1) (Transforming growth factor-  
beta signaling

protein 1) (BSP-1) (hSMAD1) (JV4-1).

[Source:Uniprot/SWISSPROT;Ac:Q15797]

AGATAAATTCTGTCCCACAAAGCACCTCATATTTTGTATAATTA ACTATCTTCATGGCATTTGCATTTTCTACAGTTCAC  
TGATTTTACCTCTTCAGCTT

In100 candidate1770 (in intron):

LOCUS ENSG00000179241

DESCRIPTION low density lipoprotein receptor class A domain containing 3

[Source:RefSeq\_peptide;Acc:NP\_777562]

CTGTAGATAACCAATCTCTTTAGTTTCTGGTTTATCCTCCTGTATTTCTTTTGCACAGATAAGCCAATACATGTATGTTT  
TCTTATACCCCTTCTCTTCT

In100 candidate1771 (in intron):

LOCUS ENSG00000179241

DESCRIPTION low density lipoprotein receptor class A domain containing 3

[Source:RefSeq\_peptide;Acc:NP\_777562]

TAACCTCTCGTCCATATTTTCTCTTTTTGTGTCTCTTTCTGCTGCGTTCTGAATAATTCTTCTTGAGCTATCATTTCAGTT  
CATTTATTCTTTTTTTCATCT

In100 candidate1772 (in intron):

LOCUS ENSG00000120519

DESCRIPTION Sodium/bile acid cotransporter 7 (Na+)/bile acid cotransporter7)  
(Solute carrier family 10 member 7). [Source:Uniprot/SWISSPROT;Acc:Q0GE1]

TTTATTGCATTATTTATAAACACTAATGCTTGATAACTGATTTGAAGTAATTCTAACTCCTATTTTCTTGTTTTACAGCT  
TGGTTCATCTTCTTCTGTGC

In100 candidate1773 (in intron):

LOCUS ENSG00000145808

DESCRIPTION ADAMTS-19 precursor (EC 3.4.24.-) (A disintegrin and  
metalloproeinase with thrombospondin motifs 19) (ADAM-TS 19) (ADAM-TS19).  
[Source:Unirot/SWISSPROT;Acc:Q8TE59]

AGAGTGAGACTCCGTCTCAAAAAAAAAAAAAAGTTAACTTCTGATATTGCTCCTCAACTATGTTCTTTTGACAGTTTTTA  
CCATTTTCATTATTTGCCATC

In100 candidate1774 (in intron):

LOCUS ENSG00000179832

DESCRIPTION CDNA FLJ35542 fis, clone SPLEN2002917.

[Source:Uniprot/SPTREMBLAcc:Q8NAD1]

AGAAGTTCAACATTTTCATGGGATTAACCATGCTCAACTTCCCTTTGTTAATTCATCAATCACATTTATGCTTTTCAGCGT  
TCACTTTGTTTTCCCATAT

In100 candidate1775 (in intron):

LOCUS ENSG00000137473

DESCRIPTION NYD-SP14 protein [Source:RefSeq\_peptide;Acc:NP\_114162]

CATCATATCTCATTCTTCCCTTTAACTCCTGACATTTTATCTTGGTAATCTCTCTGCTCCATTGTTTATGTCCTCCAGGT  
TCTCTCTGTAGTTCTACGTA

In100 candidate1776 (in intron):

LOCUS ENSG00000137473

DESCRIPTION NYD-SP14 protein [Source:RefSeq\_peptide;Acc:NP\_114162]

TTGCATTTCCCTGTTGGCCCGTAACATTGAGCATTTTTTTTCATGTGCTTCTTGGCCATTTGTATATCTTCTCGGCAGAC  
GTTTTTATTCAGATTCTTTG

In100 candidate1777 (in intron):

LOCUS ENSG00000198108

DESCRIPTION Chondroitin sulfate synthase 3 (EC 2.4.1.175) (Glucuronosyl-  
Ncetylgalactosaminy-

proteoglycan 4-beta-N- acetylgalactosaminytransferase I)

(Chondroitin synthase 2) (N- acetylgalactosaminy-proteoglycan 3-

betaglcuronosyltransferase

II) (EC 2.4.1.226) [Source:Uniprot/SWISSPROT;Acc:Q70JA]

AAATACTTGTTATTTTGATTACCACATCTCTAATAACTTCCTTGTGTTTTTTCTTCATCTTTCAGTTTTAGTCATTTTCT  
ATTGACTTAGTTAACTTTCC

In100 candidate1778 (in intron):

LOCUS ENSG00000198108



DESCRIPTION Chondroitin sulfate synthase 3 (EC 2.4.1.175) (Glucuronosyl-Ncetylgalactosaminy-

proteoglycan 4-beta-N- acetylgalactosaminytransferase I)

(Chondroitin synthase 2) (N- acetylgalactosaminy-proteoglycan 3-beta-glucuronosyltransferase

II) (EC 2.4.1.226) [Source:Uniprot/SWISSPROT;Acc:Q70JA]

TGTCTGTCATTAACCTCTTTATTTCTATTTCACTTTCCTAATTTCTGCCGTTCTATCCCTTAATAATAGCTTTCCACAGTG  
CCTATTTTTTTTCTGATTTTA

In100 candidate1779 (in intron):

LOCUS ENSG00000197124

DESCRIPTION Zinc finger protein 682. [Source:Uniprot/SWISSPROT;Acc:O95780]

EXON

AGTTGTGTTTGGTTCTTTCAAAGGAAGTAGTGAGATCCTTTTGAGGTAACGAAACACTCTGGCTTTCTGTATTGCCAGCT  
TTCTTTTCGCTTTCACATCTG

In100 candidate1780 (in intron):

LOCUS ENSG00000158985

DESCRIPTION CDC42 small effector 2

[Source:RefSeq\_peptide;Acc:NP\_001033791]EXON

AGCATTTGATGTGGTTGATAACATCATGTTTGAAATCTTCCCTTTGTTTCTGGCATATTACTGCCTGTTTTTCAGTTTCTT  
TTGTTGGTTCCTTTTTCATTG

In100 candidate1781 (in intron):

LOCUS ENSG00000164168

DESCRIPTION transmembrane protein 34 [Source:RefSeq\_peptide;Acc:NP\_060711]

EXON

TTTTTATTTTATTTTATTTTATTTTGCTTAGTATTCTGTTATGTGGATATAACTTTTTACTAATCTCCTTTTGATATTCAGGT  
TGTCCTAATTTTTTTTACCA

In100 candidate1782 (in intron):

LOCUS ENSG00000163798

DESCRIPTION Kanadaptin (Kidney anion exchanger adapter protein) (Solute  
carrier family 4 anion exchanger member 1 adapter protein) (Lung cancer oncogen 3  
protein). [Source:Uniprot/SWISSPROT;Acc:Q9BWU0]

AGAACTGTCACCTGGGACTTAACTTTCCTATCATCCTTAAGATTTCTTTGTCCTTTCTCCAGGGTTGACTTTTCTGTTTC  
TTGATTCTCATATTCTCATA

In100 candidate1783 (in intron):

LOCUS ENSG00000158987

DESCRIPTION Rap guanine nucleotide exchange factor 6 (PDZ  
domaincontainingguanine  
nucleotide exchange factor 2) (PDZ-GEF2) (RA-GEF-2).

[Source:Unipro/SWISSPROT;Acc:Q8TEU7]

CACCTGCTTAACTGATTTTATTGATCACTTTTATTTTCACTTGTATATCCCCATTATTTCAACTCATTTTACAGTT  
GTCTTTGGTACTTCTTTTAG

In100 candidate1784 (in intron):

LOCUS ENSG00000149084

DESCRIPTION Estradiol 17-beta-dehydrogenase 12 (EC 1.1.1.62) (17-beta-HSD 1)  
(17- beta-hydroxysteroid dehydrogenase 12) (3-ketoacyl-CoA reductase) (EC1.3.1.-  
) (KAR). [Source:Uniprot/SWISSPROT;Acc:Q53GQ0]  
GTTGTCTTAACCCACTGATGCTGTCTTTAGTTTTTATTGAGTTTCTTTCTCTCTGTGTTTCATTTTTGGACAGTGTTT  
ATTTATATGCCTTCACATTC

In100 candidate1785 (in intron):

LOCUS ENSG00000151623

DESCRIPTION Mineralocorticoid receptor (MR).  
[Source:Uniprot/SWISSPROT;Acc:08235]  
TCTTATTGAAAGTGGTCATCCCCTGCCTTCTAACACATCACCTTCTTTGTCTCTCTTCATAGCAGTACCTGTCAGAATGA  
TCTTTCTTTACTTCATTTCT

In100 candidate1786 (in intron):

LOCUS ENSG00000151623

DESCRIPTION Mineralocorticoid receptor (MR).  
[Source:Uniprot/SWISSPROT;Acc:08235]  
TTAAATAACGTTTCCTTGTTGGTTTTGCTGTATGTGATTTTTCCCCCTCAGCTCTGTTTCCTTCCCGTTCCTTCTAACCTC  
ATCTCTGATTTTCATTGTGTT

In100 candidate1787 (in intron):

LOCUS ENSG00000157445

DESCRIPTION calcium channel, voltage-dependent, alpha 2/delta 3 subunit  
[Sorce:RefSeq\_peptide;Acc:NP\_060868]  
TCTGAGCCTTTTTTGCTCATTTTTTTTTCTTTTCCTTTAACTTGTTTTTTTTCTCCTTAAAATTTCTTTTCTGCCAGAT  
ACATTTCTACTTTGCCTTTT

In100 candidate1788 (in intron):

LOCUS ENSG00000157445

DESCRIPTION calcium channel, voltage-dependent, alpha 2/delta 3 subunit

[Source:RefSeq\_peptide;Acc:NP\_060868]

CAAATGAGACTGAGATTTTCTTCACCTTTAACATTTGAGGATGTTTAGCTCTTGTTTCAGCCCTCACCTATTAAAAGTTCT  
ATTTGTTTTGTTGTCTGTTT

In100 candidate1789 (in intron):

LOCUS ENSG00000157445

DESCRIPTION calcium channel, voltage-dependent, alpha 2/delta 3 subunit

[Source:RefSeq\_peptide;Acc:NP\_060868]

ACTGTTGCGCATGAATAAATGCTCGATAAATGGCTATCACTCCTGTCAATAACAATGACTCTCTCTTAGTCCTATCAGCT  
AAGTATTGTTATCCTCTTTT

In100 candidate1790 (in intron):

LOCUS ENSG00000157423

DESCRIPTION hydrocephalus inducing isoform b

[Source:RefSeq\_peptide;Acc:NP\_60028]

TATAATGATGGCAATATGGTGACACTAAGTTAATTCTGACTAACATCTATTTCAATTCTATTTGCCACTTTTTATACAGTA  
TTTCATTTTCTACAATTCTG

In100 candidate1791 (in intron):

LOCUS ENSG00000151348

DESCRIPTION Exostosin-2 (EC 2.4.1.224) (EC 2.4.1.225) (Glucuronosyl-Nacetylglucosaminyl-

proteoglycan/N-acetylglucosaminyl-proteoglycan 4- alpha-

Naceylglucosaminyltransferase)

(Putative tumor suppressor protein EXT2) (Multiple

exostoses protein 2). [Source:Uniprot/SWISSPROT;Acc:Q93063]

ACTGCTTTTAACTCTAACTTTTCTCTGATACTTTCTTCCTATTTCCCCATTAATGCTGTTTTTAAATTTCTTACTCAGAA

ACCTCTTTTTACTTCAAGTT

In100 candidate1792 (in intron):

LOCUS ENSG00000158467

DESCRIPTION Putative adenosylhomocysteinase 3 (EC 3.3.1.1) (S-adenosyl-Lhomocysteine

hydrolase 3) (AdoHcyase 3). [Source:Uniprot/SWISSPROT;Acc:Q96HN2]

AACTTTGTAAATCCCTTGCTGCTAATTCTAACATATATGTCAATTTTGTTAGCTTCAGTTGATTGATTTTTTTCTTCT

TCATGGGTCATATTTTCTTT

In100 candidate1793 (in intron):

LOCUS ENSG00000158019

DESCRIPTION Protein BRE (Brain and reproductive organ-expressed protein)

(BCA1/BRCA2-containing complex subunit 45). [Source:Uniprot/SWISSPROT;Acc:Q9NR7]

TTTCTCTGTCTTTTTTTGGATGAGCTCTCACTTGCACTTAACAATTTCCCCCTGTGTTTTTCTAGTTCTTTCTTCCAGTT

CTCATTCATTTTTTCTTCAC

In100 candidate1794 (in intron):

LOCUS ENSG00000158019

DESCRIPTION Protein BRE (Brain and reproductive organ-expressed protein)

(BCA1/BRCA2-containing complex subunit 45). [Source:Uniprot/SWISSPROT;Acc:Q9NR7]

CTGTTTCCCAAAGTGGATTATTTTGAAACAAATTCATACATTTAAATTAAGTAAATACTTTAGCTCCTGTTTCAGTT  
TTTAATGCCATGCTGCCTTT

In100 candidate1795 (in intron):

LOCUS ENSG00000164398

DESCRIPTION Long-chain-fatty-acid--CoA ligase 6 (EC 6.2.1.3) (Long-chain acyl-

CoA synthetase 6) (LACS 6). [Source:Uniprot/SWISSPROT;Acc:Q9UKU0]

AACCCCTATGGATAACTGGTCTTTTTAGTTTTTGGCTTATCCTTCCTGTGTTTCTTTTGTACAAATCAGGAGATATCCAT  
GTATTTCTTTATATCCTCTT

In100 candidate1796 (in intron):

LOCUS ENSG00000139746

DESCRIPTION RNA-binding protein 26 (RNA-binding motif protein 26) (CTCL tumr

antigen se70-2). [Source:Uniprot/SWISSPROT;Acc:Q5T8P6]

GATTTATCATAGTTTTTTTTTCTTAAGTATTGACTATTTTAAATTTTATTTTTTAATTCAGTGGCCTCTCAGGATT  
ATTACCTGCATTTTTTTTTC

In100 candidate1797 (in intron):

LOCUS ENSG00000198589

DESCRIPTION Lipopolysaccharide-responsive and beige-like anchor protein (CD4-

like protein) (Beige-like protein). [Source:Uniprot/SWISSPROT;Acc:P50851]EXON

TCTTTCTAGGATTATTGTAACACCCTTCAAACTGTTCTTGTTCTCTGCCAGTCATTCTATACCTCCATATATTTTCCCA  
CATGATATTTATACTTATCT

In100 candidate1798 (in intron):

LOCUS ENSG00000198589

DESCRIPTION Lipopolysaccharide-responsive and beige-like anchor protein (CD4-  
like protein) (Beige-like protein). [Source:Uniprot/SWISSPROT;Acc:P50851]EXON  
TTTATATTAATGGTAGGTTTTGAAATGGTAGTATGAGTCTTCTAACTTTGTTCTTCTTCATTTTTTTTTTTTGAGACAGAT  
TTTTGTTCTTGTCACCCTGG

In100 candidate1799 (in intron):

LOCUS ENSG00000198589

DESCRIPTION Lipopolysaccharide-responsive and beige-like anchor protein (CD4-  
like protein) (Beige-like protein). [Source:Uniprot/SWISSPROT;Acc:P50851]EXON  
AAACTGATTATATCCAAAATTTTTGACATTAAGTATTAACAATTAGTCTCATTTTTTACCATTAGTTTCTATTTACAGGCA  
TGCCTCATTTTTACTGTGCTT

In100 candidate1800 (in intron):

LOCUS ENSG00000198589

DESCRIPTION Lipopolysaccharide-responsive and beige-like anchor protein (CD4-  
like protein) (Beige-like protein). [Source:Uniprot/SWISSPROT;Acc:P50851]EXON  
TCATGAACATGGTATACTTTTTTCTTTAAGTTTAACTTTTTTTTTTTTTTTTACCATTCTTTCTGTTTGACATGCAGAA  
TTCTAGCACATTTTTTGTTTC

In100 candidate1801 (in intron):

LOCUS ENSG00000198589

DESCRIPTION Lipopolysaccharide-responsive and beige-like anchor protein (CD4-

like protein) (Beige-like protein). [Source:Uniprot/SWISSPROT;Acc:P50851]EXON  
TAACTGTTAACTTTATCTTCTAAAGTGATTTTTTATTTTCTATTTAATTTCTGTTCTTATCCTTATTTAACTTTCAGTG  
TTCACTGGCTGTTCTTTTTC

In100 candidate1802 (in intron):

LOCUS ENSG00000198589

DESCRIPTION Lipopolysaccharide-responsive and beige-like anchor protein (CD4-  
like protein) (Beige-like protein). [Source:Uniprot/SWISSPROT;Acc:P50851]EXON  
ATAACCTTGTTTAAATGCTGCTGGAATTCTCAAGCTTCCATTTTCTCTCTTGCTTTTTGATTCTACCAGACTTTTTTGCT  
AGAATGGTCTTTATTGTCTC

In100 candidate1803 (in intron):

LOCUS ENSG00000198589

DESCRIPTION Lipopolysaccharide-responsive and beige-like anchor protein (CD4-  
like protein) (Beige-like protein). [Source:Uniprot/SWISSPROT;Acc:P50851]EXON  
CCTTGCCTTTGCTTTAAAGGTTTCCTTTATTCCCACCCAAGACTAACTTCTAAAATTCCTCTTTATACAATTCAGCTTTT  
CATCTCCCTAGCATAGTGTT

In100 candidate1804 (in intron):

LOCUS ENSG00000198589



DESCRIPTION Lipopolysaccharide-responsive and beige-like anchor protein (CD4-like protein) (Beige-like protein). [Source:Uniprot/SWISSPROT;Acc:P50851]EXON  
TTCTCTGAGATTCTAGGCTTTGAATGTAATAACTAATTCTGCCATCTGTTTCTCACTACTCTTTGTATTGATCAGTTCTA  
TTCCTGATGTTTACATTTC

In100 candidate1805 (in intron):

LOCUS ENSG00000132141

DESCRIPTION T-complex protein 1 subunit zeta-2 (TCP-1-zeta-2) (CCT-zeta-2) (TCP-1- zeta-like) (CCT-zeta-like) (Testis-specific Tcp20) (Testis-specific rotein TSA303). [Source:Uniprot/SWISSPROT;Acc:Q92526]

GTTACTTTCTCTTTATAACTTTTGAATTTTTTTTTTCTAAAGGTGTTTTAAAATCTTTTTTCCTTCCAGATGTTTGGTGT  
AGACTACTTCTATCTTTTTT

In100 candidate1806 (in intron):

LOCUS ENSG00000106459

DESCRIPTION Nuclear respiratory factor 1 (NRF-1) (Alpha palindromicbindingprotein)

(Alpha-pal). [Source:Uniprot/SWISSPROT;Acc:Q16656]

ATTTTTGTGCCTTGTGTATCATATTTCTTCCTTATTAAGGAGGGTGGATTACCCACTTTCTTGGGTTTTTCAGTTAGT  
ACTTTTATCCATCAGTTTTC

In100 candidate1807 (in intron):

LOCUS ENSG00000163947

DESCRIPTION Rho guanine nucleotide exchange factor 3 (Exchange factor found in platelets and leukemic and neuronal tissues) (XPLN).

[Source:Uniprot/SWISPROT;Acc:Q9NR81]

AACACGTTATTTCCACAACCTACCACACCAAAAAGCCTTTAACTTGGTTATTTTGTGCTTTATCCTGTTTTTCAGTCTTCT  
TAAATATACATTTTATTCCC

In100 candidate1808 (in intron):

LOCUS ENSG00000144730

DESCRIPTION Interleukin-17 receptor D precursor (IL-17 receptor D) (IL-17RD  
(Interleukin-17D receptor) (IL-17D receptor) (IL17Rhom) (Interleukin- 17  
rceptor-like protein) (Sef homolog) (hSef). [Source:Uniprot/SWISSPROT;Acc:Q8FM7]  
CCACCCTCTAGTCTCTAGTTCTTCCTGCATATGTGGCCCTAACACTGTTTTGTTGTTATCATTCCTTTCCTGGTTCAGTT  
TCCTTTAATGTTTTTTGTTT

In100 candidate1809 (in intron):

LOCUS ENSG00000144730

DESCRIPTION Interleukin-17 receptor D precursor (IL-17 receptor D) (IL-17RD  
(Interleukin-17D receptor) (IL-17D receptor) (IL17Rhom) (Interleukin- 17  
rceptor-like protein) (Sef homolog) (hSef). [Source:Uniprot/SWISSPROT;Acc:Q8FM7]  
TACTAACCTTGGCTTCTAGATTATAGTTTTCTTTTCCTCCCATGATGTTACTCTGCTTTCCTCTTCATTCTAGCCCAGTT  
ATCCTTCTCCTTGTTAAGCT

In100 candidate1810 (in intron):

LOCUS ENSG00000128607

DESCRIPTION

TTCTTGTTTATAACCGGCTCTTGATTTTTTAAACTTAGTTCCAATATTTTCTTTTTTTATTAATTTGTTTCTTTCAGTT  
TTCTTTTTTTTTTTTTTTTTTTT

In100 candidate1811 (in intron):

LOCUS ENSG00000146842

DESCRIPTION CDNA FLJ14803 fis, clone NT2RP4001442.

[Source:Uniprot/SPTREMBLAcc:Q96SK2]

AGCTCTTCTTTAGTAATGTCTAAACTGTTATTTAACTAATTCATTGAGTTTTTTAATTTTCAGCCACTTGTTCTCATTTT  
ATAGTTTTATTTGGTCCTTT

In100 candidate1812 (in intron):

LOCUS ENSG00000166747

DESCRIPTION AP-1 complex subunit gamma-1 (Adapter-related protein complex  
1gamma- 1 subunit) (Gamma-adaptin) (Adaptor protein complex AP-1 gamma-1 subnit)  
(Golgi adaptor HA1/AP1 adaptin subunit gamma-1) (Clathrin assembly proein  
complex 1 gamma-1 large chain). [Source:Uniprot/SWISSPROT;Acc:043747]

TGTTTACTTTAAAATAAACTCTTTAAAGTTAACATATGGTAAAATTGACTCTTCTGGTTTATTGTTTTACAGTTCTGTGA  
GGATTTTTTGTGTTTTGTTTT

In100 candidate1813 (in intron):

LOCUS ENSG00000168387

DESCRIPTION Ankyrin repeat and SOCS box protein 14 (ASB-14).

[Source:Unipro/SWISSPROT;Acc:Q8WXK2]

AGTCATTGCCTCCTATGAAAGTTCATCCCGGATTAACACTACTGCTACCATTACCCTTTCCTTTTGATTTATATCAGATAAC  
AGTTTTTTCTCCTCAGTTT

In100 candidate1814 (in intron):

LOCUS ENSG00000163669

DESCRIPTION CDNA FLJ40427 fis, clone TESTI2039113.

[Source:Uniprot/SPTREMBLAcc:Q8N7R9]

TAACTCTGCTGATTATTTCTTTTGCTGTGCAGGAGGTTTTAGTTTAATTAAGTCCCATCTATTTATCTTTGTTTTGTT  
GCATTTGTTTGTTGTTCTTT

In100 candidate1815 (in intron):

LOCUS ENSG00000163669

DESCRIPTION CDNA FLJ40427 fis, clone TESTI2039113.

[Source:Uniprot/SPTREMBLAcc:Q8N7R9]

TGTTTTCTCTTCTATTTTTCTGTCTTCTCTGGTTTTAACTATTTTGTATGATTCCATTTTTTCTCTTCTCTTAGCAGAT  
CAATTATACTTACTTTTTTA

In100 candidate1816 (in intron):

LOCUS ENSG00000109670

DESCRIPTION F-box/WD repeat protein 7 (F-box and WD-40 domain protein 7)

(Fbox protein FBX30) (hCdc4) (Archipelago homolog) (hAgo) (SEL-10).

[Source:Uiprot/SWISSPROT;Acc:Q969H0]

TCCTGATTAATATAACTAGAAATTAGTTATTTTTTTCCACTGGTTACCCACAGTATCTCTGTGGCTTTTATAGCACTTAAC  
ATCCTTATTTGTATTTTTCT

In100 candidate1817 (in intron):

LOCUS ENSG00000109670

DESCRIPTION F-box/WD repeat protein 7 (F-box and WD-40 domain protein 7)  
(Fbox protein FBX30) (hCdc4) (Archipelago homolog) (hAgo) (SEL-10).

[Source:Uiprot/SWISSPROT;Acc:Q969H0]

GAATCATTCAAATCATTGATTTTCTGGTTAACTTTGTTAGTAGTTTGTTTTTTTCTGAGTCTTTTGTTTTAATCCAGAT  
AGTCAGTCTTTTCTCCTTT

In100 candidate1818 (in intron):

LOCUS ENSG00000109670

DESCRIPTION F-box/WD repeat protein 7 (F-box and WD-40 domain protein 7)  
(Fbox protein FBX30) (hCdc4) (Archipelago homolog) (hAgo) (SEL-10).

[Source:Uiprot/SWISSPROT;Acc:Q969H0]

CTACAACATTAATTCTAACACCAAGTAACATTATAACCCACTTAAACTGTTCTTTTTTCTTTCTTTTTTTTAGTACAGAC  
AGAACTTTTTTTTTTTTAAT

In100 candidate1819 (in intron):

LOCUS ENSG00000174844

DESCRIPTION CDNA FLJ44290 fis, clone TRACH2019473.

[Source:Uniprot/SPTREMBLAcc:Q6ZTR8]

CTGACCATTTATTTCTTTCTAACATTCCTTTATGTTTATTCATCTGGTTCTCTATTATTTCTCTGTCATCTCCACAGGT  
TCCTCTTTCTTGACTGGCTG

In100 candidate1820 (in intron):

LOCUS ENSG00000187008

DESCRIPTION Polycystic kidney disease 1-like protein 3.

[Source:Uniprot/SPTEMBL;Acc:Q7Z443]

ATTCCATTTTATATTAATAAGAAAGTTGACATACTGATATTATTTCTATTGTTTGTTCTTATCTTTTTACTTTCAGCC  
CTTTTTATGGTTTTGCTTAG

In100 candidate1821 (in intron):

LOCUS ENSG00000187008

DESCRIPTION Polycystic kidney disease 1-like protein 3.

[Source:Uniprot/SPTEMBL;Acc:Q7Z443]

TGTAACCTCCTGGAGTTCTGATTTTCTTATATTTTGGCTTCTGTTTTCCATCTTTTTCATCTAATATCTGCAGTATTTAAT  
TTTTATCTTCTAAACTATTT

In100 candidate1822 (in intron):

LOCUS ENSG00000135365

DESCRIPTION PHD finger protein 21A (BRAF35-HDAC complex protein BHC80)

(BHC0a). [Source:Uniprot/SWISSPROT;Acc:Q96BD5]

GAGCTTTTGTACATGGGCTTTTTTTATAGGCCTAAGAATTCTTTAACGTTTTGATCACATTAATTTTCTCAGGTGTATGT  
TTTGTCTGCTTTGCGATTTT

In100 candidate1823 (in intron):

LOCUS ENSG00000170006

DESCRIPTION transmembrane protein 154 (TMEM154), mRNA

[Source:RefSeq\_dna;Ac:NM\_152680]

TATGTGTTAGAGGGTAGCCCTCTAACACATCAAGTAAGGTCTTTCATCTACTTTTATTGCACCTTGTTACTTTTACAGAT  
TTTTTTTTTGCATTGATTGT

In100 candidate1824 (in exon):

LOCUS ENSG00000170006

DESCRIPTION transmembrane protein 154 (TMEM154), mRNA

[Source:RefSeq\_dna;Ac:NM\_152680]

TATTTATGCCAAAATTGCATACAATTGTTTTCTGAATCATAACTTGTCTATTTTTCTGCCTATGTGTGCTACTTTCAGTT  
TGTTTCTCATCAACATTTTG

In100 candidate1825 (in intron):

LOCUS ENSG00000164144

DESCRIPTION Arfaptin-1 (ADP-ribosylation factor-interacting protein 1).

[Source:Uniprot/SWISSPROT;Acc:P53367]

GAAATGTGTATTTTCTTATATCCCCCTTCATTCTTACATGAACATAACATACCATAGGGATTTTTTTGCTTTTTTTCAGAC  
TTTGCTTTTTTTCAGTTAACA

In100 candidate1826 (in intron):

LOCUS ENSG00000158623

DESCRIPTION testis specific, 13 [Source:RefSeq\_peptide;Acc:NP\_443165]

AGGAACATTATCTCTACTAACACCATTTCCTATTTACTTCCTTAATCTCTTTCTCTGTATCAGGTCCTTATATGTAAGTGT  
CTTCTGTCTTTACCTCCACA

In100 candidate1827 (in intron):

LOCUS ENSG00000128585

DESCRIPTION Muskelin. [Source:Uniprot/SWISSPROT;Acc:Q9UL63]

TGACATAACTTCCATCATTTTTGTTTTGTTTTGTTTTTCATTTTAGTGCTTTCTTAATTTCTGGTATTACAGGATGCTCC

AGGCTCATCTTGTTTATTTT

In100 candidate1828 (in intron):

LOCUS ENSG00000128585

DESCRIPTION Muskelin. [Source:Uniprot/SWISSPROT;Acc:Q9UL63]

AGAAGTCTAACAACCTTTCATGCCTTGGCATTCCCAATCTTTTATTTTCAGCTAGCTATTGCTGTCGATTTTTTGTTCTGTT  
CTCAGTCCTTTGGCTATTTTC

In100 candidate1829 (in intron):

LOCUS ENSG00000146938

DESCRIPTION Neuroligin-4, X-linked precursor (Neuroligin X) (HNLX).

[SourceUniprot/SWISSPROT;Acc:Q8N0W4]

TTGTTTTATGAGTTATGATGAATGCACCTTAGCTGTTTCTAACCCCGCTCCCATTCCTGTTTTTATTTGTAAGTCAGAA  
CCCAGCATTTTTACATTTTTT

In100 candidate1830 (in intron):

LOCUS ENSG00000146938

DESCRIPTION Neuroligin-4, X-linked precursor (Neuroligin X) (HNLX).

[SourceUniprot/SWISSPROT;Acc:Q8N0W4]

AGCTAACCTGGTTGCTAATCTCTGCAAGCTCGTACTTTTTCTGCAGCACGTGATTCTGTTCTCATTTACTCTTGTAATCC  
TTCTGTTTCCTTCTGACCAG



In100 candidate1831 (in intron):

LOCUS ENSG00000121211

DESCRIPTION GAJ protein [Source:RefSeq\_peptide;Acc:NP\_115493]

AAGGAAAAGTAAACTCTGGGCATAACCTGAAGCTGTTCTATTTCTCTTCAGTTGACAGTAGCAACTACTACTTCTTTAT  
TTGTTCTTTTTGTTTGTTTT

In100 candidate1832 (in intron):

LOCUS ENSG00000121211

DESCRIPTION GAJ protein [Source:RefSeq\_peptide;Acc:NP\_115493]

ATCATGAAAAATCTGAGTTTCACGATAACCAAATCGGACCCTTCATTTACTCTTACTTGCCTTTTTTCCTGATTTTCAGTT  
TTGTGTGATTCTTGTACTTT

In100 candidate1833 (in intron):

LOCUS ENSG00000179399

DESCRIPTION Glypican-5 precursor. [Source:Uniprot/SWISSPROT;Acc:P78333]

TGTGCTCTTGATCTCTCTTTCTTCTTTACCTTTATAACCTTCTTGTGTTGTTTATCCCTTGTGTCATTGCATTTTCAGTT  
TCTTTCATTCTTTTGGCTCT

In100 candidate1834 (in intron):

LOCUS ENSG00000179399

DESCRIPTION Glypican-5 precursor. [Source:Uniprot/SWISSPROT;Acc:P78333]

GTTTTTTGTTTTTGTTTTTTTAAATGAATATCCCTTAACAATAAGAGATATATGTTCTTCCCTGACATTTTACAGCTTTA  
TTCTCTTAATCCAGTAACTT

In100 candidate1835 (in intron):

LOCUS ENSG00000179399

DESCRIPTION Glypican-5 precursor. [Source:Uniprot/SWISSPROT;Acc:P78333]

TTTCCCCTTATGATCTAAGTAATAAATCTCTTAACTGGTGCGAACATTTAGATATCTAATCTTGTTCCCTCATTCAGTT  
TTATCTTTTAATATTATTTT

In100 candidate1836 (in intron):

LOCUS ENSG00000179399

DESCRIPTION Glypican-5 precursor. [Source:Uniprot/SWISSPROT;Acc:P78333]

AGAAATCTCTTAATATTCCCAAGTTCCTAACCATTTTTTTCTCCCTGTTTTTCTATATTCATTTACAGAGGTCCCTTCT  
GTTAAATACATTGCTTTTTTC

In100 candidate1837 (in intron):

LOCUS ENSG00000179399

DESCRIPTION Glypican-5 precursor. [Source:Uniprot/SWISSPROT;Acc:P78333]

CCTTCAAATTCATCTATTCTTTAGTTTTTCATAGTGCTTTAACTTTGAAGTTTTCTTCCTTCGTTCTTTTCACTTTCAGCT  
CTTTTTGGCTTTTTTATTACT

In100 candidate1838 (in intron):

LOCUS ENSG00000179399

DESCRIPTION Glypican-5 precursor. [Source:Uniprot/SWISSPROT;Acc:P78333]

AAAAGCTCAAATTCTGAAGAATTCAAAAGATGTCATTAAAAATACGTAAGTAGAAATCAAGATTTTCAAATTCTTCAGTA  
TTTTTAATAGGTCCTTTTTT

In100 candidate1839 (in intron):

LOCUS ENSG00000179399

DESCRIPTION Glypican-5 precursor. [Source:Uniprot/SWISSPROT;Acc:P78333]

CTTTGGGGATAGATACAATTTAGCCAAATTATTGCCACTTTGTAACAAAAATGGTCTTTCTTCACTCCATTTTTCAGTA  
AGATTTTCCTCATTTATCTC

In100 candidate1840 (in intron):

LOCUS ENSG00000179399

DESCRIPTION Glypican-5 precursor. [Source:Uniprot/SWISSPROT;Acc:P78333]

GTGTGATGTCAAATGGATATAACTTACAAAGTGTTTTTCTTCATTTTTTTCCCTTTATAAGTGGCACAGAAAATTTGTTT  
TTACTTATGTTTTTGCATCC

In100 candidate1841 (in intron):

LOCUS ENSG00000179399

DESCRIPTION Glypican-5 precursor. [Source:Uniprot/SWISSPROT;Acc:P78333]

AAGTATCTTTTCCCTGTCATCTACCCATTAATATTTTCTAGTTAACTTGGAGGTAAATCCTTGCTTTTCATGTCACAGAA  
TTCTTTAATATTTTCTTAA

In100 candidate1842 (in intron):

LOCUS ENSG00000205045

DESCRIPTION Schlafen 5 (Fragment). [Source:Uniprot/SPTREMBL;Acc:Q6IEE8]

TTCTTACTTCTGTCTAGAAAATTCTTCCCCCCTTCTTCACCAAATTA ACTCTTCACCTCATTTGCATTCTTCAGATCTT  
AACTCAAATGTTACTTTTTC

In100 candidate1843 (in intron):

LOCUS ENSG00000205045

DESCRIPTION Schlafen 5 (Fragment). [Source:Uniprot/SPTREMBL;Acc:Q6IEE8]

CCTCTAGAAGCCCTGTCCGGGCGTAACAAAGGGCTCACACTTGTTTTCTGGTCACTTTTCATCATGTCCCTTCAGCTCCT  
ATCTCTGTATGGCCTGGTTT

In100 candidate1844 (in intron):

LOCUS ENSG00000110497

DESCRIPTION CDNA FLJ20294 fis, clone HEP05851.

[Source:Uniprot/SPTREMBL;AccQ9NXE7]

ATATTAATATTACATCTATATGTATTACAAACCCAACAATGTGGTGTAACTTATTGATTAATACAATCTTTTCTCAGGC  
ATCCTTCTGTTTGTTCCTG

In100 candidate1845 (in intron):

LOCUS ENSG00000183098

DESCRIPTION Glypican-6 precursor. [Source:Uniprot/SWISSPROT;Acc:Q9Y625]

TTCTTTTGCTTGGTCTAGTCTCTTGGTAAACTTTTCACTGCATTTTGTAACCTCCCTAAATGAGTCTTTCATTTCCAGAA  
GTTCTGTGTTTTGTTTTGTT

In100 candidate1846 (in intron):

LOCUS ENSG00000183098

DESCRIPTION Glypican-6 precursor. [Source:Uniprot/SWISSPROT;Acc:Q9Y625]

ACCTAATTACCATGTGATTTTGGTTTGTATTCTATGGTTAGTAACTATATGAAAACCTACTTTTATATCATTTTTTCAGTT  
TGAACCATCCTTTAATTTCT

In100 candidate1847 (in intron):

LOCUS ENSG00000183098

DESCRIPTION Glypican-6 precursor. [Source:Uniprot/SWISSPROT;Acc:Q9Y625]

TGATGTTGCTTTGCTAACTTTTCCATTTGTTTGGAATTTTTTCTTTGTTCTTTTTTGCTTTCTATCAGAATTAACCTCC  
GAAAGCTTCTGCTTTTCTC

In100 candidate1848 (in intron):

LOCUS ENSG00000183098

DESCRIPTION Glypican-6 precursor. [Source:Uniprot/SWISSPROT;Acc:Q9Y625]

ATGTATTATCTTAAGGTATTCATCATTAGACTAACATTTTTCTCTAATTTTCATTATTTTTTACTGTGGCTCTTACAGTC  
TATTTCTTGTTCCAATTTT

In100 candidate1849 (in intron):

LOCUS ENSG00000183098

DESCRIPTION Glypican-6 precursor. [Source:Uniprot/SWISSPROT;Acc:Q9Y625]

CCTTAGTTTTTAACGACCCCTAATTTCTTCAAGTCTAATCTTTGCTTGTTTTATCTCACAGTTATATCCTCATTCTTC  
AGCAATCACTCTAATTCTTT

In100 candidate1850 (in intron):

LOCUS ENSG00000183098

DESCRIPTION Glypican-6 precursor. [Source:Uniprot/SWISSPROT;Acc:Q9Y625]

TCTTTACATTGTGGTCTCATTCATGATAAATGTTGCCAATAACTTATGTATAAGTTGTCTATTTTTTAGTGTTTACAGGG  
ACATTTCTTTTTTCTACATG

In100 candidate1851 (in intron):

LOCUS ENSG00000140836

DESCRIPTION Alpha-fetoprotein enhancer-binding protein (AT motif-binding factor) (AT-binding transcription factor 1). [Source:Uniprot/SWISSPROT;Acc:Q1511]  
TTTGCCCAAGGAAAGTACTTTGGCTTTTAACATTTAAAGGGGATTTTTCTTTCTTTGACGTTTCTGCCTTTCAGCCTTC  
ATTCATGGAGTTTCTTGCTT

In100 candidate1852 (in intron):

LOCUS ENSG00000006125

DESCRIPTION AP-2 complex subunit beta-1 (Adapter-related protein complex 2 eta-1 subunit) (Beta-adaptin) (Plasma membrane adaptor HA2/AP2 adaptin betasubunit) (Clathrin assembly protein complex 2 beta large chain) (AP105B).  
[Source:Uniprot/SWISSPROT;Acc:P63010]

TAACTTCTTTGCTGCTGCTCTCCCCTTCATTTTCTCTATTTCTTATCAGACGTCTTGCTATTTGGATGTTGATTCTCCTG  
GACTGACTCTGTTTTCCCCT

In100 candidate1853 (in intron):

LOCUS ENSG00000175224

DESCRIPTION Uncharacterized protein KIAA0652.  
[Source:Uniprot/SWISSPROT;Acc:O75143]

AGGTGTGCACCACCGTGCCCGACCAAAAAAATTTAACGTGTACCCATTATTTCTCTTTTCAGCTCTCCTTTTGTTTAT  
TCTTTTCCTTAAAATCTTTT

In100 candidate1854 (in intron):

LOCUS ENSG00000115295

DESCRIPTION CAP-GLY domain-containing linker protein 4 (Restin-like  
protein2). [Source:Uniprot/SWISSPROT;Acc:Q8N3C7]

ATCAATTTATAGGTAAGCATTTCTATGCTTAATTAGACTTTAACTACTTTGAAAATTCTGCTTTGTTTTACCTACCAGGT  
ATTGGCCGTTTTTTTTCTGT

In100 candidate1855 (in intron):

LOCUS ENSG00000130021

DESCRIPTION Haloacid dehalogenase-like hydrolase domain-containing protein A  
(GS1 protein). [Source:Uniprot/SWISSPROT;Acc:Q08623]

TGTTTCAAATATATTAATGAACCTTATCATTTCTGATTACTGATTTATTTAACCTTGTAAGGACTGTCTCCATGTCAGTT  
GTCACATTTTCTTGGTGCC

In100 candidate1856 (in exon):

LOCUS ENSG00000130021

DESCRIPTION Haloacid dehalogenase-like hydrolase domain-containing protein A  
(GS1 protein). [Source:Uniprot/SWISSPROT;Acc:Q08623]

AGTCTGAGTGGGAAAGTCCTGTTTTTGATGAGCACTCCTTGTTAGCTAACATTTAAATTCTTTTGTGACCTCAGAATGT  
CTCTGGATCTTTCCTCATTG

In100 candidate1857 (in intron):

LOCUS ENSG00000106554

DESCRIPTION Coiled-coil-helix-coiled-coil-helix domain-containing protein 3

[Source:Uniprot/SWISSPROT;Acc:Q9NX63]

AGGAGTGGGGTGGTTGGTGATGTTATGTTTGGAATAACATATTAAGGATTTCTATTTTTGGATTCTTATTTACAGGTAAG  
TTTTTTTTTTCTTTAATTAG

In100 candidate1858 (in intron):

LOCUS ENSG00000149488

DESCRIPTION Transmembrane channel-like protein 2 (Transmembrane cochlearexpressed  
protein 2). [Source:Uniprot/SWISSPROT;Acc:Q8TDI7]

AGTTGTTTCTATTTGGAAACTATTATGAATAACTCTACTATAAAACATTCACTTTCAGGTCTTTTTCTTTTATATCTTTA  
TTTTTATATTACTAATTTCT

In100 candidate1859 (in intron):

LOCUS ENSG00000131558

DESCRIPTION Exocyst complex component 4 (Exocyst complex component Sec8).

[ource:Uniprot/SWISSPROT;Acc:Q96A65]

AATAATAGGCTTGGAAACTTATTTCTTAAGTTGTTTCTTTAGTGCTTATATTCTTAAGTATCTCTTTTCCTCTTCAGTT  
TGTACTTTCAGTCTATTCAT

In100 candidate1860 (in intron):

LOCUS ENSG00000131558



DESCRIPTION Exocyst complex component 4 (Exocyst complex component Sec8).

[source:Uniprot/SWISSPROT;Acc:Q96A65]

CGTCGAAAGTCCATTTTTATATATGGTATTAAGTCTAATTTTATCTTCTCTATATAGTCTGTTGGCTCAGGC  
TGTTTATTGAATCCTTTTTC

In100 candidate1861 (in intron):

LOCUS ENSG00000131558

DESCRIPTION Exocyst complex component 4 (Exocyst complex component Sec8).

[source:Uniprot/SWISSPROT;Acc:Q96A65]

GTAATTCATTCCTAACTATTTTGTCTTTTAAAGATTTTTTTTCTGTTTACATATGTTGGTTTTCTTTTTATCTTTCAGTT  
CTTGTTTTTTTTTTTTTTCC

In100 candidate1862 (in intron):

LOCUS ENSG00000131558

DESCRIPTION Exocyst complex component 4 (Exocyst complex component Sec8).

[source:Uniprot/SWISSPROT;Acc:Q96A65]

TTCCATTTAACTTTTCTGTTTGTGATTTTTTTCCTCTGTTCCCTCTGAGCATTTGTACTTGCCATTCCTGTACTGCAGAT  
ACACCTTTGTTTTCTTCTCT

In100 candidate1863 (in intron):

LOCUS ENSG00000131558

DESCRIPTION Exocyst complex component 4 (Exocyst complex component Sec8).

[source:Uniprot/SWISSPROT;Acc:Q96A65]

GCTACCTCTGACTCTTTTCTATAAGTTTTAGCTAACTCTAACAAGATACTTTTTCACTCTTCTCCATATTTAGTTCAGAT  
CTGTCTTTGTCTGTAGATCT

In100 candidate1864 (in intron):

LOCUS ENSG00000131558

DESCRIPTION Exocyst complex component 4 (Exocyst complex component Sec8).

[source:Uniprot/SWISSPROT;Acc:Q96A65]

CTTTCATATATTTAATAACTATTATTAGGTTATCCTTATGCTGTCATTTCTTCAGCCACAATAATCCCAGTTCCTTTAAG  
CTTTATTTTTTATCCTGCTTT

In100 candidate1865 (in intron):

LOCUS ENSG00000131558

DESCRIPTION Exocyst complex component 4 (Exocyst complex component Sec8).

[source:Uniprot/SWISSPROT;Acc:Q96A65]

AGAGTTGGGAGTCTTCTCTGACAATTAACTTTGCGTCATCTCTCATCAAATTATTTTGCTTTTTTCCTGTGCAGTACCTT  
TTAGATCTGCCCTTTCTTAT

In100 candidate1866 (in intron):

LOCUS ENSG00000131558

DESCRIPTION Exocyst complex component 4 (Exocyst complex component Sec8).

[source:Uniprot/SWISSPROT;Acc:Q96A65]

AAAGAAACATTAAC TTATCACTCATAGTTTTGATTTTCTTTGCATTTTACTCTTGTTATTTTATTTATTCAC TAACAGTA  
TTATTTTGCCTCTTCATGTC

In100 candidate1867 (in intron):

LOCUS ENSG00000131558

DESCRIPTION Exocyst complex component 4 (Exocyst complex component Sec8).

[Source:Uniprot/SWISSPROT;Acc:Q96A65]

TGGTGCTCTGTCCCAAGATCATTGCCCTCCCTGGAAGGATTTATTATTAAC TGCTCTCCCTATCTCTCTCTTTTTCAGGG  
TTCACTGTTTCCACTATCTT

In100 candidate1868 (in intron):

LOCUS ENSG00000163686

DESCRIPTION abhydrolase domain containing 6

[Source:RefSeq\_peptide;Acc:NP\_05727]

TCCCACGTACATAAGCATAACAAATATATTTTCTCTCTCACTCTCTGT TTTTTCAGTGTTAGGGTATTACTCTTATCCACT  
GTCTTCTGTTCATGCTTTT

In100 candidate1869 (in intron):

LOCUS ENSG00000090863

DESCRIPTION Golgi apparatus protein 1 precursor (Golgi sialoglycoprotein  
MG160) (E-selectin ligand 1) (ESL-1) (Cysteine-rich fibroblast growth factor  
receptor) (CFR-1). [Source:Uniprot/SWISSPROT;Acc:Q92896]

GTCCGTCTTCCATGTCTCTTTAACTTTTTCTTTGGTACTTTTCATTTCTTTGTACTACATTTTAGGTAACTCCTCAGTTC  
TCTTTCCCAGCATATAATTT

In100 candidate1870 (in intron):

LOCUS ENSG00000155530

DESCRIPTION leucine-rich repeats and guanylate kinase domain containing

[Source:RefSeq\_peptide;Acc:NP\_653249]

TTACTCCCCTCAACTCCTGGTAACCTCGAATCTACTTTCTTTTCTCTATGAGTTTGCCTACTCTCGATATTTTCACAGTT

TTATTTTCAATTTAACCTT

In100 candidate1871 (in intron):

LOCUS ENSG00000121297

DESCRIPTION Teashirt homolog 3 (Zinc finger protein 537).

[Source:Uniprot/SISSPROT;Acc:Q63HK5]

TTTGTGGCTGGGAAGAAGGTAACATAAATAATTAGTTTCATTTATTCAGTCATTCATTCGTTCTGTCACTCATTCATTCAT  
TCATTCATTCATTCCTTTAT

In100 candidate1872 (in intron):

LOCUS ENSG00000171094

DESCRIPTION ALK tyrosine kinase receptor precursor (EC 2.7.10.1) (Anaplasti  
lymphoma kinase) (CD246 antigen). [Source:Uniprot/SWISSPROT;Acc:Q9UM73]

ATTAAGCAATGACTCCCCATTCCCCACCCTAGTAACCTCTAGTCTACTTTCTGTCTCTATTTATTTGCATGTATCAGAA  
TTTCATTCTTTTCTGAGGCT

In100 candidate1873 (in intron):

LOCUS ENSG00000171094

DESCRIPTION ALK tyrosine kinase receptor precursor (EC 2.7.10.1) (Anaplasti  
lymphoma kinase) (CD246 antigen). [Source:Uniprot/SWISSPROT;Acc:Q9UM73]

TCCTATTTTCTATCTCTTTATCTTATAACCCTCTGTTGACTTTTCCCATTCTACTATAATCTTTTAAATTCACCAGTC  
TTGTTTTGCTATCATAATT

In100 candidate1874 (in intron):

LOCUS ENSG00000011201

DESCRIPTION Anosmin-1 precursor (Kallmann syndrome protein) (Adhesion molecule- like X-linked). [Source:Uniprot/SWISSPROT;Acc:P23352]

TATGGTGTCTAACATTTTAAAAATCCTATTTGACATATTTTTCATTTCTTCCTTTTTACTTCTGGAATTTCTATGCAGCT  
CTGTTCTGTAGCTTTCATTC

In100 candidate1875 (in intron):

LOCUS ENSG00000151962

DESCRIPTION

CACATATGTTAAACCTTTTTACTGTAAACCTGTGTATTGATTATATTTCTTCTGTATTGTCCATCCTTTTGTATGTCAGTC  
TGTATATTTTCTTACCTGTC

In100 candidate1876 (in intron):

LOCUS ENSG00000173809

DESCRIPTION ES cell associated transcript 8.

[Source:Uniprot/SPTREMBL;Acc:Q87J7]

CTCCCATTCCTGTAGGTTTTCTGTAACTCTGATGATAGTTTCTTCTGCTGTGCAGAAGCTCTTTAGTTTAATTCAATCCC  
ATTTGTCAATTTTACTTTT

In100 candidate1877 (in intron):

LOCUS ENSG00000185082

DESCRIPTION limb bud and heart development homolog

[Source:RefSeq\_peptide;Ac:NP\_112177]

TATATAATATAAATTTCTATTAATAAAAAATTAAATAAAAAATAACACTTTAGCCACCATTCTATTTTTTTATTGTCAGTA  
GAATTTTTTTTTTTTTTTTTTTT

In100 candidate1878 (in intron):

LOCUS ENSG00000172954

DESCRIPTION lysocardiolipin acyltransferase isoform 1

[Source:RefSeq\_peptid;Acc:NP\_872357]

AGCCATTGGTAACATTTTGATGTACTTCTATCTAGTGCTTTTTTTGTTTCAGTGATTTCACTCTCTAGTTTTTGGTCCCCT  
TTTGTTCTCTTGCTTTGCTT

In100 candidate1879 (in intron):

LOCUS ENSG00000113522

DESCRIPTION DNA repair protein RAD50 (EC 3.6.-.-) (hRAD50).

[Source:UniprotSWISSPROT;Acc:Q92878]

TTCTTCCTTAGTATTTTGATTCCTTCTTGAATGTGTCTTTACTCATTTTAACTATACACATTTTATATTCTCTTTCAGAT  
TGTTATTTTTTTAATTTTCAACA

In100 candidate1880 (in intron):

LOCUS ENSG00000164116

DESCRIPTION Guanylate cyclase soluble subunit alpha-3 (EC 4.6.1.2) (GCS-alpha-3) (Soluble guanylate cyclase large subunit) (GCS-alpha-1).

[Source:Uniprt/SWISSPROT;Acc:Q02108]

AATACTGTCTTATTTAGGCAAAATATAAATACTTAATGTTAAATACTTTTAACAACATTTTAAATTCCTTTCTTTCAGAG  
ATACTTCACTTTTCTTCCAT

In100 candidate1881 (in intron):

LOCUS ENSG00000131941

DESCRIPTION Rhophilin-2 (GTP-Rho-binding protein 2) (76 kDa RhoB effector  
potein) (p76RBE). [Source:Uniprot/SWISSPROT;Acc:Q8IUC4]

GGAGCTACATTTCAATCCACAATAGACATTATAATGATGATAACCATGATCATGATGTTTATTCTTTTCACCTAGCAGGT  
CCTCTTTAATTTTTTTTAAAA

In100 candidate1882 (in intron):

LOCUS ENSG00000152749

DESCRIPTION Integral membrane protein GPR180 precursor (Intimal thicknessrlated  
receptor). [Source:Uniprot/SWISSPROT;Acc:Q86V85]

AAATAGTAACATACTAAACATTTTTCTATATCTTGTTTTTTTCTCCCTATATCTTTAATGTACCAAACATTTCAACAGCT  
ATTTATTAAC TTATTTTTTA

In100 candidate1883 (in intron):

LOCUS ENSG00000163689

DESCRIPTION CDNA FLJ42117 fis, clone TESTI2005376.

[Source:Uniprot/SPTREMBLAcc:Q6ZVT6]

TTATTGTGAAGAATAAAATTAAAACTATGCTTGAGCTAACCACCTAAGTTAGTTTCATTTGGTATATTTCTTTTCAGTC  
TTTTTTGCCATTACACTTT

In100 candidate1884 (in intron):

LOCUS ENSG00000163689

DESCRIPTION CDNA FLJ42117 fis, clone TESTI2005376.

[Source:Uniprot/SPTREMBLAcc:Q6ZVT6]

AGTATTATATTTTAACTGGAAAATCTCTACTTTATTTTGAAGTTTTTTTCCTACAGTCATTCCTTTTTTCTTTCTTT  
TTTTTATTTTTTTTTTATTAT

In100 candidate1885 (in intron):

LOCUS ENSG00000163689

DESCRIPTION CDNA FLJ42117 fis, clone TESTI2005376.

[Source:Uniprot/SPTREMBLAcc:Q6ZVT6]

TACTATTTACCATTTGTGGCTTGGTGATATTCTGTAATCATAACATTTTATCTTCTTTGTTTGTTTACCCTACCAGTGTTT  
TTTATATATTTTGTGTGTTTT

In100 candidate1886 (in intron):

LOCUS ENSG00000189283

DESCRIPTION Bis(5'-adenosyl)-triphosphatase (EC 3.6.1.29) (Diadenosine  
5',5''- P1,P3-triphosphate hydrolase) (Dinucleosidetriphosphatase) (AP3A  
hydrolse) (AP3AASE) (Fragile histidine triad protein).

[Source:Uniprot/SWISSPROT;cc:P49789]

TACACATAAGCCATTTTCTGCCGCATTTAAGGAAACCATTAACCACTTGCTTCTGTTATTCTCTTCATGTATATTCAGCC  
CCTTTCTCTGTTCTGCTTTG

In100 candidate1887 (in intron):



LOCUS ENSG00000189283

DESCRIPTION Bis(5'-adenosyl)-triphosphatase (EC 3.6.1.29) (Diadenosine 5',5''- P1,P3-triphosphate hydrolase) (Dinucleosidetriphosphatase) (AP3A hydrolse) (AP3AASE) (Fragile histidine triad protein).

[Source:Uniprot/SWISSPROT;cc:P49789]

AAAAGGATTGTTATTGCTTGGTAGTGAGATTAAGTGGTGATCTAAATTTTCTCCTATGTGTTTTTCTGTCTCTTCCAGAT  
TTTCTATGCTGTAAGTTTTT

In100 candidate1888 (in intron):

LOCUS ENSG00000189283

DESCRIPTION Bis(5'-adenosyl)-triphosphatase (EC 3.6.1.29) (Diadenosine 5',5''- P1,P3-triphosphate hydrolase) (Dinucleosidetriphosphatase) (AP3A hydrolse) (AP3AASE) (Fragile histidine triad protein).

[Source:Uniprot/SWISSPROT;cc:P49789]

AGAAAACAAAGAAGGATTCTAATCATGTATAACATAATTTTCCCATTAACTTATGCTATTTTCTTCTTCTCAGAGCTCA  
GCACTTTTAGTATTTTTTTT

In100 candidate1889 (in intron):

LOCUS ENSG00000189283

DESCRIPTION Bis(5'-adenosyl)-triphosphatase (EC 3.6.1.29) (Diadenosine 5',5''- P1,P3-triphosphate hydrolase) (Dinucleosidetriphosphatase) (AP3A hydrolse) (AP3AASE) (Fragile histidine triad protein).

[Source:Uniprot/SWISSPROT;cc:P49789]

TATGAAACTGGTAACTTCTGTTTCTCATACTTTTATCCATTTCAGTCAGTCACAACTTCTGTGCTTCTGCCTGTGTTGTGT  
CTCGCACATTGTTCTTTTCT

In100 candidate1890 (in intron):

LOCUS ENSG00000144724

DESCRIPTION Receptor-type tyrosine-protein phosphatase gamma precursor (EC .1.3.48) (Protein-tyrosine phosphatase gamma) (R-PTP-gamma).

[Source:Unipro/SWISSPROT;Acc:P23470]

TTTGCCCTTAATATGTTTATATTGTTGCTGTAACTTTATTGTTTTGTCTGTCTTACCAGACACAAGGCAAGATTTG  
TTTCTCTCTTCACTCTCTTT

In100 candidate1891 (in intron):

LOCUS ENSG00000125257

DESCRIPTION Multidrug resistance-associated protein 4 (ATP-binding  
cassettesub- family C member 4) (MRP/cMOAT-related ABC transporter)  
(Multispecificorganic  
anion transporter-B) (MOAT-B).

[Source:Uniprot/SWISSPROT;Acc:O15439]

AATTATAGGCCATCCAAGTAAAGATTTCTAATGTAATGTCCTGTAACCTTAAACCTGATCATTATCCTGTTATTTTCAGGG  
ATGTTCTTGTCATGTTTTTT

In100 candidate1892 (in intron):

LOCUS ENSG00000125257

DESCRIPTION Multidrug resistance-associated protein 4 (ATP-binding  
cassettesub- family C member 4) (MRP/cMOAT-related ABC transporter) (Multi

specificorganic anion transporter-B) (MOAT-B).

[Source:Uniprot/SWISSPROT;Acc:O15439

TCTAAATTTCTGTAATCTTTTAACTAAAAAGAAGGGAATTTTTTTTATCTTTCTGTATTTTACCTACAGAATACTTTTAT  
TGATCATACTGTGTTTTTCT

In100 candidate1893 (in intron):

LOCUS ENSG00000125257

DESCRIPTION Multidrug resistance-associated protein 4 (ATP-binding  
cassettesub- family C member 4) (MRP/cMOAT-related ABC transporter)  
(Multispecificorganic  
anion transporter-B) (MOAT-B).

[Source:Uniprot/SWISSPROT;Acc:O15439

CCTAGGCTAAGTTGTTTAACTTATTTGCACTTCCATCTTTATCTCTGGCTGTCAGCATCTTGATAGACTGTTTCTTGCTC  
ATCTTTGAATCTCCCATTCC

In100 candidate1894 (in intron):

LOCUS ENSG00000145431

DESCRIPTION platelet-derived growth factor C precursor

[Source:RefSeq\_peptie;Acc:NP\_057289]

AGCTTTTTGTTTTAATTCTGAATTTTAACTTTAATTTTGATTATATCTCTTACAGCTTTTGTCTTTATTAATTTTCACCT  
GATATTTTGTTTTGATTTGC

In100 candidate1895 (in intron):

LOCUS ENSG00000109738

DESCRIPTION Glycine receptor subunit beta precursor (Glycine receptor 58 kD  
subunit). [Source:Uniprot/SWISSPROT;Acc:P48167]

AGCTGATTAACCACCTTCATTGGCTATTTCTTATTGTCCTTCCTGACATATTGAGTTTTCCAGATATTCATCCTTAGTTC  
TTT TAGCTTCTTGCTTATCA

In100 candidate1896 (in intron):

LOCUS ENSG00000109738

DESCRIPTION Glycine receptor subunit beta precursor (Glycine receptor 58 kD subunit). [Source:Uniprot/SWISSPROT;Acc:P48167]

AGTCATCCTGTTTCATAACTTTGTCTCAATTTTTTCCTTCTTCCTTGAATCAGTAACTGTTTTCAAATGTTTTCTCTGCTT  
TTTTTCACATCTGTCCTATC

In100 candidate1897 (in intron):

LOCUS ENSG00000080802

DESCRIPTION CCR4-NOT transcription complex subunit 4 (EC 6.3.2.-) (E3 ubiquitin protein ligase CNOT4) (CCR4-associated factor 4) (Potential transcriptinal repressor NOT4Hp). [Source:Uniprot/SWISSPROT;Acc:O95628]

GTGAAAAATGACAAAATAGAAGAAAAGTCAACCAAGATAACTATTGGTAAAAGTTTGCTTTAATGTGTTTCCTTTCAGTC  
TTTTTGTTTATTTGTTTGTT

In100 candidate1898 (in intron):

LOCUS ENSG00000120251

DESCRIPTION Glutamate receptor 2 precursor (GluR-2) (GluR-B) (GluR-K2) (Gluamate receptor ionotropic, AMPA 2) (AMPA-selective glutamate receptor 2). [ource:Uniprot/SWISSPROT;Acc:P42262]

TGGTAGCATAATATACACTGTTCTTTATCTTGATTGTTTTCTTCTTAACATAAATCGGAGTTCTGCTTTTATGTGCAGAG  
ATTTTCCTCTTCTTTTTTTC

In100 candidate1899 (in intron):

LOCUS ENSG00000120251

DESCRIPTION Glutamate receptor 2 precursor (GluR-2) (GluR-B) (GluR-K2)  
(Gluamate receptor ionotropic, AMPA 2) (AMPA-selective glutamate receptor 2).  
[ource:Uniprot/SWISSPROT;Acc:P42262]

ACAAATATATCTTCCTTAAAAATATATTCACTGGCAATTTTCATAACACAATCCTGAGTTATTCACGTATCTTTATCAGTC  
ATCATTTTTCTTTGCCTTCC

In100 candidate1900 (in intron):

LOCUS ENSG00000120251

DESCRIPTION Glutamate receptor 2 precursor (GluR-2) (GluR-B) (GluR-K2)  
(Gluamate receptor ionotropic, AMPA 2) (AMPA-selective glutamate receptor 2).  
[ource:Uniprot/SWISSPROT;Acc:P42262]

AGAAGTGTTTAACTTTTTCCATCCTTTCATATTTATTTTTTTGTATTTTCATACAGACTTTGTGATAAAGTCCCTTAATTA  
TATTCTTTTTGTATTCTT

In100 candidate1901 (in intron):

LOCUS ENSG00000163618

DESCRIPTION Calcium-dependent secretion activator 1 (Calcium-dependent  
actiator protein for secretion 1) (CAPS-1). [Source:Uniprot/SWISSPROT;Acc:Q9ULU]  
GTAACATTATTTAACTGGTTGTATTGATTTCTCTTTCTTTTTTTACTACTCTATACATTCTGCAGTAAGCATCTTTGTGT  
ACTTACCTTTCTACACTTCT

In100 candidate1902 (in intron):

LOCUS ENSG00000146950

DESCRIPTION Apical-like protein (Protein APXL).

[Source:Uniprot/SWISSPROT;Ac:Q13796]

AAGCAATGAACCAATATTGCTACATTATTTGTTGTAACTAAAGCCCAAACCTTGTTTCCTATTTCTTAGTTTCCCAGTT  
TCCCATTAATGTCCTTTTCT

In100 candidate1903 (in intron):

LOCUS ENSG00000134873

DESCRIPTION Claudin-10 (OSP-like protein).

[Source:Uniprot/SWISSPROT;Acc:P7369]

CTCAAATGGTTAAGATGAGAAGTGGAATAATTTTCTAACAATAAATTATTTCTATCTGAATTATTTTCTGTCAGGA  
CTTTCTGTACTTCCTCTGA

In100 candidate1904 (in intron):

LOCUS ENSG00000152910

DESCRIPTION Contactin-associated protein-like 4 precursor (Cell  
recognitionmolecule Caspr4). [Source:Uniprot/SWISSPROT;Acc:Q9C0A0]

GTATATTGTTACTTTTAAAGGCTAACCCTAGTTCTATTCTCCAATGCTTTTTATTTTGATTAATTTCTTTTTGTCAGTT  
AGTTGATATTTTACCTTTTT

In100 candidate1905 (in intron):

LOCUS ENSG00000171509

DESCRIPTION Relaxin receptor 1 (Relaxin family peptide receptor 1)  
(Leucinerich repeat-containing G-protein coupled receptor 7).

[Source:Uniprot/SWISSROT;Acc:Q9HBX9]

TTCAAGAATTGTCCTTAGCATTCAACAATTCGGCTAACTGGTGCATGAGGCCTGGTTTTTTGACTTATCTCAGCTTTCAAA  
ATGCCTTCCTTACTATGTTT

In100 candidate1906 (in intron):

LOCUS ENSG00000181072

DESCRIPTION Muscarinic acetylcholine receptor M2.

[Source:Uniprot/SWISSPROTAcc:P08172]

CTAATTTACCATCTGTATATGTTTTCTGGTGAGTTATCCATTAAGATAACTGTGGGTTTGTCTTTTCATTTCTCTCAGTC  
TGTGGCTTCTTTGCTCATTG

In100 candidate1907 (in intron):

LOCUS ENSG00000163632

DESCRIPTION Putative uncharacterized protein C3orf49.

[Source:Uniprot/SWISSROT;Acc:Q96BT1]

ACCCAAAGTACTATATCATCTTAGAATACACATTTTTTATAGCTAACATTTACTGTATTCTTTCCATTAATACAGTAATT  
GTTATTATTCTTTTACCACC

In100 candidate1908 (in intron):

LOCUS ENSG00000140873

DESCRIPTION ADAMTS-18 precursor (EC 3.4.24.-) (A disintegrin and  
metalloproeinase with thrombospondin motifs 18) (ADAM-TS 18) (ADAM-TS18).

[Source:Unirot/SWISSPROT;Acc:Q8TE60]

AGCATTTTAAAGTTTCTGTGTGAATTTATAACAATCTATAGTAATTTGCCTTTCTCTTTCCAGTTTAAATAACTCT  
GTCTCTCACTTGGTTTTGTT

In100 candidate1909 (in intron):

LOCUS ENSG00000126261

DESCRIPTION SUMO-activating enzyme subunit 2 (EC 6.3.2.-) (Ubiquitin-like 1  
activating enzyme E1B) (Anthracycline-associated resistance ARX).

[Source:niprot/SWISSPROT;Acc:Q9UBT2]

GAGAGAATCCACTTTCGGTAAAGGCTAACTTTTGCATGTGGTGTTTTGCTTTCCTTTTGTACCATTCTTCAGACAGGATT  
TTCGTCTCTGTCCTGTGTCT

In100 candidate1910 (in intron):

LOCUS ENSG00000162959

DESCRIPTION Protein memo (Mediator of ErbB2-driven cell motility)  
(C21orf19like protein) (Hepatitis C virus NS5A-transactivated protein 7) (HCV  
NS5A- ransactivated protein 7). [Source:Uniprot/SWISSPROT;Acc:Q9Y316]

TCATTTTAACTCTTTACTTAGTAGTATTTTTCTGCATTTAATCTCCTGTTTTCTATATTAGGTTTTCTTGACCAGTT  
ACTTTGAATTCTTGGTCTTC

In100 candidate1911 (in intron):

LOCUS ENSG00000052795



DESCRIPTION CDNA FLJ12906 fis, clone NT2RP2004373.

[Source:Uniprot/SPTREMBLAcc:Q9H994]

AGCCCTACCCATGCTTCTTAAGTATTTACTCCATTTTTTTCTTTCCAGTTACAGGGTTCTTCTTTTTTCTTTTTCTT  
TCTTTCTTTTTTTTTTTTAA

In100 candidate1912 (in intron):

LOCUS ENSG00000052795

DESCRIPTION CDNA FLJ12906 fis, clone NT2RP2004373.

[Source:Uniprot/SPTREMBLAcc:Q9H994]

AGTGGCCCCGGTGGCCCTTGAATTGTAACTAAAAGTAGTTGATGATATTTTTATCTCTTTCCAGCATTCATTTCTTTCT  
TGAATATTTAGACTTCCCTC

In100 candidate1913 (in intron):

LOCUS ENSG00000052795

DESCRIPTION CDNA FLJ12906 fis, clone NT2RP2004373.

[Source:Uniprot/SPTREMBLAcc:Q9H994]

AGTTAACTTGCAACATGTCTCTTTGTCGTTTTTTTTTTTGCTTTTGTTTATATCTCTCTACCAGCCTCATACTTCAATC  
CTGCCTTATTAGTTTTTTTTT

In100 candidate1914 (in intron):

LOCUS ENSG00000141140

DESCRIPTION myosin head domain containing 1 isoform 2

[Source:RefSeq\_peptid;Acc:NP\_001028751]

GGGTACTTTGTGTGGGTCTTTTAACTTGGAACTCATGTCCTTTTGTTTCAGGAAAGTATTTTTGTGTTATATCTAATAA  
TTTCCTCCCCTGTTTTCTCC

In100 candidate1915 (in exon):

LOCUS ENSG00000102580

DESCRIPTION DnaJ homolog subfamily C member 3 (Interferon-induced, doublestranded RNA-activated protein kinase inhibitor) (Protein kinase inhibitor p5)

(Protein kinase inhibitor of 58 kDa). [Source:Uniprot/SWISSPROT;Acc:Q1321]

TGCTATTTTTATTTCTATAACACGAAGTCTATTATCTCCTTAATAATTTTAAATTTCCATCCTTAGAACTTCTTCAGCT  
CTGCTACTTTTTCCTTAAGG

In100 candidate1916 (in intron):

LOCUS ENSG00000186153

DESCRIPTION WW domain-containing oxidoreductase isoform 2

[Source:RefSeq\_petide;Acc:NP\_570607]

GCCTCTGATCCATCCTAACCCGACATTCCCTTGATCTCTCCTGATCTGTGAGCATCCTGGCCCTTCTTTTCTTTTCAGTT  
TTAATTTTTGCGCTGGCTCC

In100 candidate1917 (in intron):

LOCUS ENSG00000186153

DESCRIPTION WW domain-containing oxidoreductase isoform 2

[Source:RefSeq\_petide;Acc:NP\_570607]

TTTTGTAACTTATTTTGTAGTTTCCTCAATCTTGTCGTCAGCTGTGTCTTGTATTCTGTTAACTATATGCTGAATTCT  
TCTTTACTCTTATTACTCTT

In100 candidate1918 (in intron):

LOCUS ENSG00000186153

DESCRIPTION WW domain-containing oxidoreductase isoform 2

[Source:RefSeq\_petide;Acc:NP\_570607]

TAACTGATTTATTTTTCCCTCTTGGAGTTGCTTATTCTTTTCTTCTCCAGTTGCATCTCTCCCTCTACTTAGATACACA  
TTTCCATTTTACTTCTATTT

In100 candidate1919 (in intron):

LOCUS ENSG00000168843

DESCRIPTION Follistatin-related protein 5 precursor (Follistatin-like 5).

[ource:Uniprot/SWISSPROT;Acc:Q8N475]

CAATATTTTCTCTATTTTCCCCTTTTCTTTCAACCTTTTTTTATTAACTTTTTTCTTACCACATTTTTTATCAGTCCCTAT  
ATTTCTTCTCATTCATATT

In100 candidate1920 (in intron):

LOCUS ENSG00000168843

DESCRIPTION Follistatin-related protein 5 precursor (Follistatin-like 5).

[ource:Uniprot/SWISSPROT;Acc:Q8N475]

CCAACTAGCTTCAATTGAAAATTGTTTAATGTGGAAGTTTTTAACTGATTAAAAATTCCTATCTTTACTTTGTACAGAA  
ATTTCTTCTCTTTAAACTTT

In100 candidate1921 (in intron):

LOCUS ENSG00000168843

DESCRIPTION Follistatin-related protein 5 precursor (Follistatin-like 5).

[ource:Uniprot/SWISSPROT;Acc:Q8N475]

AGCCTTGAGTACTCTGCCTAACCCCTCTTGCCCCATGCCTTTGCAATTCTCATTTCTTTAATCATTCAGCTTTCTCAACTC

ATCCATGATTCCTTTTAC

In100 candidate1922 (in intron):

LOCUS ENSG00000168843

DESCRIPTION Follistatin-related protein 5 precursor (Follistatin-like 5).

[ource:Uniprot/SWISSPROT;Acc:Q8N475]

TTTTCTGTTTTCTCATTCTGGGATTCAAAAGAACCCTGGTTTCATTAACCGTATCTGGTTTTGCTTTTTATTCAGTAAAG

TTTCATTTAATCTCTTTTCT

In100 candidate1923 (in intron):

LOCUS ENSG00000168843

DESCRIPTION Follistatin-related protein 5 precursor (Follistatin-like 5).

[ource:Uniprot/SWISSPROT;Acc:Q8N475]

GCAAGTTCTCCATAACACAAGCTGTTCTCTGATTCCATTGTTTTATTACTACTGTTCTTTTTTTTTTTTTTTTGAGACAGAG

TTTCATTCTTATTGCCCTGG

In100 candidate1924 (in intron):

LOCUS ENSG00000122779

DESCRIPTION Transcription intermediary factor 1-alpha (TIF1-alpha) (Tripartite motif-containing protein 24) (RING finger protein 82).

[Source:Uniprot/SISSPROT;Acc:O15164]

AGTTGATAATAACCTCTTGGTAATTCTTTCTCTGTGTCATCTAACGTTATGAATTTTCTTTTTCATTCCCAGTGCTGATT  
TTATAGGCCTTCCCTATTTC

In100 candidate1925 (in intron):

LOCUS ENSG00000021574

DESCRIPTION Spastin. [Source:Uniprot/SWISSPROT;Acc:Q9UBP0]

AATTTTAGTTAATTTATAACAACTCTTAATAATTTCTTTTCTTCTTCTTCTTTTTTTTTTTTTTTTTTTGAGTCAGGG  
TCTTGCTCTTTTGCTCAGGT

In100 candidate1926 (in intron):

LOCUS ENSG00000021574

DESCRIPTION Spastin. [Source:Uniprot/SWISSPROT;Acc:Q9UBP0]

GTTGTGGTTTTGATTTGCATTTCCCTCATAATTAACGATGTTGAGCATTTTTTCATATCTTTGTTTTTGACGGTCCAGCT  
AGTTTTATTGGTTACTTTTT

In100 candidate1927 (in intron):

LOCUS ENSG00000102595

DESCRIPTION UDP-glucose:glycoprotein glucosyltransferase 2 precursor (EC  
2..1.-) (UDP-glucose ceramide glucosyltransferase-like 1) (UDP-- Glc:glycoprotein  
glucosyltransferase 2) (HUGT2). [Source:Uniprot/SWISSPROT;Acc:Q9NYU1]

GAGGAAGAGCTGGGTTGCCAAGATCTTTTGGGGACTTGCCCTACAATAACATCATATAAAATGTGTTTTTCCCTCAGTG  
TTCTTCACATTCTCAATTTT

In100 candidate1928 (in intron):

LOCUS ENSG00000102595

DESCRIPTION UDP-glucose:glycoprotein glucosyltransferase 2 precursor (EC  
2..1.-) (UDP-glucose ceramide glucosyltransferase-like 1) (UDP-- Glc:glycoprotein

glucosyltransferase 2) (HUGT2). [Source:Uniprot/SWISSPROT;Acc:Q9NYU1]

TTTCTTCTTTTAAAAGGGCATATATTTATGTTGGTAGTTCTAATTAACCTCTACCTTTATTTTCATCTCTTTAAACCAGTT  
TCCTCCTTTTCCATTATATG

In100 candidate1929 (in intron):

LOCUS ENSG00000166446

DESCRIPTION Chromodomain Y-like protein 2 (CDY-like 2).

[Source:Uniprot/SWISPROT;Acc:Q8N8U2]

GGCTTGGCTAACACCACTCCCCGTTTTCTTCCCTGTGTACCAAACCTTACTGACTCTTTTTTGTTCATGCAGCTATCCTTT  
GCTTCATGACCTTTGCTCAT

In100 candidate1930 (in intron):

LOCUS ENSG00000108270

DESCRIPTION Protein AATF (Apoptosis-antagonizing transcription factor) (Rbinding  
protein Che-1). [Source:Uniprot/SWISSPROT;Acc:Q9NY61]

CTTTTTTTGTTTTTTGTTTTGAATCCATGGGTTTCTCTAATTAACATGGTTTGTTTCTACTTGACTTTTCAGTTTTAGGC  
ATTACTTGTTGACTCCCCTT

In100 candidate1931 (in intron):

LOCUS ENSG00000151276

DESCRIPTION Membrane-associated guanylate kinase, WW and PDZ domain-containing protein 1 (BAI1-associated protein 1) (BAP-1) (Membrane-associated guanylate kinase inverted 1) (MAGI-1) (Atrophin-1-interacting protein 3) (AIP3) (W domaincontaining

protein 3) (WWP3) ( [Source:Uniprot/SWISSPROT;Acc:Q96QZ]

ACTATGAGTGTAAATTTTCTCAATATAGTAGCTCTCAATAGATGGTAACTGACATTATTATTTTCCTTATTAGTACAGAT  
TCTTTCAGTGTGTGTTACT

In100 candidate1932 (in intron):

LOCUS ENSG00000151276

DESCRIPTION Membrane-associated guanylate kinase, WW and PDZ domain-containing protein 1 (BAI1-associated protein 1) (BAP-1) (Membrane-associated guanylate kinase inverted 1) (MAGI-1) (Atrophin-1-interacting protein 3) (AIP3) (W domaincontaining

protein 3) (WWP3) ( [Source:Uniprot/SWISSPROT;Acc:Q96QZ]

AAATAATAGTTTCTCTTTTCCCTTTCTTTCCTTTATTTTTATGACGAATTAACCTACCTGGAATCAAGTTTTTTTCAGAA  
TTTGAGTTCCAACCTTTTTC

In100 candidate1933 (in intron):

LOCUS ENSG00000145416

DESCRIPTION E3 ubiquitin-protein ligase MARCH1 (EC 6.3.2.-) (Membraneassociated RING finger protein 1) (Membrane-associated RING-CH protein I) (MARCHI) (RING finger protein 171). [Source:Uniprot/SWISSPROT;Acc:Q8TCQ1]

TGTTAGTCTGAATGATATTAACCTACTGTCCATCTTGTTCTCTATTTATGAAGTATGTTACTTCTCCTTTCCACTGCAGAT  
CAGTTTGCTTGACTTCCTCT

In100 candidate1934 (in intron):

LOCUS ENSG00000145416

DESCRIPTION E3 ubiquitin-protein ligase MARCH1 (EC 6.3.2.-) (Membraneassociated RING finger protein 1) (Membrane-associated RING-CH protein I) (MARCHI) (RING finger protein 171). [Source:Uniprot/SWISSPROT;Acc:Q8TCQ1]

AAAAAAATTACAAAATAATACAAATAGTAACTACACAAACAATTATATCCATCCAGGTTCCCAGCATGGATGTGGTTTT  
ATCTTCTTCCTCCATCCTTT

In100 candidate1935 (in intron):

LOCUS ENSG00000152683

DESCRIPTION solute carrier family 30 (zinc transporter), member 6  
[Source:RfSeq\_peptide;Acc:NP\_060434]

AGAATAACCCTTATATATCCTTAATTATTTTTTCATGAACCTTTCCTCATGTTCCAGTATCCTCTTAGTTGCTTCTCCTT  
TGTGCTCTGGTGGTACCTTG

In100 candidate1936 (in intron):

LOCUS ENSG00000132142

DESCRIPTION Acetyl-CoA carboxylase 1 (EC 6.4.1.2) (ACC-alpha) [Includes:  
Bitin carboxylase (EC 6.3.4.14)]. [Source:Uniprot/SWISSPROT;Acc:Q13085]

ATAGTCTGATTTTCTGTTTAACATGTGCTGGGCTCTCTCTCTCTTTTTTTTTTCCCTCAATCTATTACTAACTCTCAGAGT  
AACCTCTTCATTTCTTTCT

In100 candidate1937 (in intron):

LOCUS ENSG00000183439



DESCRIPTION Putative tripartite motif-containing protein 61.

[Source:Unipro/SWISSPROT;Acc:Q5EBN2]

TGAATCCTATTGTGATGGCGTCTTTTTCCATCTCCTGGGAAGACAATTCTAACAAACAACCTCTATTATATCTATCCAGTT  
TGATTTTGTCTCTTTCTCT

In100 candidate1938 (in intron):

LOCUS ENSG00000205582

DESCRIPTION

TGAAAGCCCAATAACAAGCTGGTGGTTTGTTTTATTGCTTTTTTAACACTTTTATTTATCAGTTCATAGTAGTCATGATT  
CTCTTGCTTATTTTATCTTC

In100 candidate1939 (in intron):

LOCUS ENSG00000088881

DESCRIPTION Transcription factor COE4 (Early B-cell factor 4) (EBF-4) (Olf-  
/EBF- like 4) (OE-4) (O/E-4). [Source:Uniprot/SWISSPROT;Acc:Q9BQW3]

TTTTTATTATATATGAATAATTTTTTTTAACTCTGCTAAATTTCTGCTCACCTTTTCCTTCTTGCATTTTGCAGCTTTT  
TGGAGGGCCATTTTCTTTCT

In100 candidate1940 (in intron):

LOCUS ENSG00000144741

DESCRIPTION solute carrier family 25, member 26

[Source:RefSeq\_peptide;Acc:P\_775742]

AGTAAGGTGATAACTTTGGAATATTTTCACTTTCCTCTTGTTTCAGCTTTCCCCACACCCAGCCAAAAAGTTTTTTGTTTT  
TTTTTGTTTGTTTGTTTGTT

In100 candidate1941 (in intron):

LOCUS ENSG00000105948

DESCRIPTION tetratricopeptide repeat domain 26

[Source:RefSeq\_peptide;Acc:N\_079202]

AGTTAGCTTCATAACTGCCATCCTGTTATTAGTTCTCTATTTGCCCAGCTGGTCCATGTGGTCTGTGTTCCCTTTTTCTCT  
CCTTTCTTGCCTTTTTTTTGG

In100 candidate1942 (in intron):

LOCUS ENSG00000105948

DESCRIPTION tetratricopeptide repeat domain 26

[Source:RefSeq\_peptide;Acc:N\_079202]

TTAGAGAGTGGGATTAGAAAGAGAAGTAACAATATGGAAATTTTTCTTTCATAATACTTTATTTTTTTTCCAGTGAACACA  
TATTACTTTTATTTTTTTTTT

In100 candidate1943 (in intron):

LOCUS ENSG00000109472

DESCRIPTION Carboxypeptidase E precursor (EC 3.4.17.10) (CPE)

(Carboxypeptidase H) (CPH) (Enkephalin convertase) (Prohormone-processing  
carboxypeptidase). [Source:Uniprot/SWISSPROT;Acc:P16870]

CTTGACTTTCCTAACCCCTGCTCAACCTTCTGTCTTTAGCTTAAATGTTACCTTCTCAGGGAAACCTTCCTTGTCTTTCC  
AGACTGATTTAGTTTTTTTC

In100 candidate1944 (in intron):

LOCUS ENSG00000185352

DESCRIPTION Heparan-sulfate 6-O-sulfotransferase 3 (EC 2.8.2.-) (HS6ST-3).

Source:Uniprot/SWISSPROT;Acc:Q8IZP7]

G TTCCTAACTTTAAATGTATACCTATATACAAC TTTCTCTCTCCCCATTTT TAGTTCAATTGCTCATATTATCAGGATT  
ATATATTTAAATTCTTTTCT

In100 candidate1945 (in intron):

LOCUS ENSG00000185352

DESCRIPTION Heparan-sulfate 6-O-sulfotransferase 3 (EC 2.8.2.-) (HS6ST-3).

Source:Uniprot/SWISSPROT;Acc:Q8IZP7]

G TTTTTTTCTTCTAACTCTTATACTTTTATTTATCTTTCCATTTCCCTTATTTATTTCTGCCACTCCTTAATTACAGTT  
TTTTGTTTGTTTGTTTTTGT

In100 candidate1946 (in intron):

LOCUS ENSG00000185352

DESCRIPTION Heparan-sulfate 6-O-sulfotransferase 3 (EC 2.8.2.-) (HS6ST-3).

Source:Uniprot/SWISSPROT;Acc:Q8IZP7]

A TAACTACTAGCTTCTGCTTCTTTCTATGTTTTAGCCCAATTTTTTTCCTTCTATAGACCAGATTTCTTCTTCTCAGCA  
TCCTTTTCCTTCTTCTGAGT

In100 candidate1947 (in intron):

LOCUS ENSG00000185352

DESCRIPTION Heparan-sulfate 6-O-sulfotransferase 3 (EC 2.8.2.-) (HS6ST-3).

Source:Uniprot/SWISSPROT;Acc:Q8IZP7]

T TGGGTCTTTATTATTTTCTTCTTCTTATAACCTCTGGCTTACTTTTGCATTTTGCCTAATTTCTTGCAGCCTTAGAT  
TATTTTAGATCTTCTGTTT

In100 candidate1948 (in intron):

LOCUS ENSG00000185352

DESCRIPTION Heparan-sulfate 6-O-sulfotransferase 3 (EC 2.8.2.-) (HS6ST-3).

Source:Uniprot/SWISSPROT;Acc:Q8IZP7]

TCAAATATTTGCCCATTTTGTTCCTTCAAAGAAATAACTTTTGACATTTTAGTTTTTCTATTGTCTATTGTTTTCCAGTT  
CTTTATTCTCTTTGTGAATG

In100 candidate1949 (in intron):

LOCUS ENSG00000127688

DESCRIPTION Gigaxonin (Kelch-like protein 16).

[Source:Uniprot/SWISSPROT;Ac:Q9H2C0]

ATGCTTGATAACCTCTGTAGGTCCTAATTTTCCCTTCAGTTTTGCCTTGTTATCTTGTTGGCTTCTCCTCTTCTAAGAAG  
ATTATTATTGTTGTTATTTT

In100 candidate1950 (in intron):

LOCUS ENSG00000146963

DESCRIPTION Putative RNA-binding protein Luc7-like 2.

[Source:Uniprot/SWISSROT;Acc:Q9Y383]

ACTTTTCATCAACATTGAAAACATTTTCTCTTAATTTTTTCTCATTAACATAATGAACCATATTCATTTCTTGGTCAGTT  
GTGAGCCATTCTTTTATTCC

In100 candidate1951 (in intron):

LOCUS ENSG00000018699

DESCRIPTION tetratricopeptide repeat domain 27

[Source:RefSeq\_peptide;Acc:N\_060205]

TTCTGAATACCTTTTTACTCTGTAACCGCCTTCTGAGTATTTTTTTGTTCTTATTAATGGTTTGATCTTTTCAGATCAA  
GGCATCATTTTTGCCTCTTT

In100 candidate1952 (in intron):

LOCUS ENSG00000107104

DESCRIPTION Ankyrin repeat domain-containing protein 15 (Kidney ankyrin  
repat- containing protein). [Source:Uniprot/SWISSPROT;Acc:Q14678]

TAATTGGTGAAGAAGTGGTGAAGAGGATAAGGATTAGTCTAACAAGTTTGTTTGTAATATTTCCCTCAGACTCTTCCCCT  
CCTTGATGATGATAATATTT

In100 candidate1953 (in intron):

LOCUS ENSG00000107104

DESCRIPTION Ankyrin repeat domain-containing protein 15 (Kidney ankyrin  
repat- containing protein). [Source:Uniprot/SWISSPROT;Acc:Q14678]

AGTTTTTTTTTAACTAAACTTTTGTTTTGTTGATCTTCAGTAATGTTTAAATCTCAATTTCAATTTATTTTGCTCTGATC  
TTTATTATTTTCCTTTCTCCT

In100 candidate1954 (in intron):

LOCUS ENSG00000172340

DESCRIPTION Succinyl-CoA ligase [GDP-forming] beta-chain, mitochondrial  
preursor (EC 6.2.1.4) (Succinyl-CoA synthetase, betaG chain) (SCS-betaG)  
(GTPspecific

succinyl-CoA synthetase subunit beta).

[Source:Uniprot/SWISSPROT;Ac:Q96I99]

TCTTAATTACTGTATTTATATAAATTCTGAAATTGAGTAGAATAACTCTTGTCACCTTTATTCTTCTTTTCCAAAACAGTT  
TTACCTGTTCTAGTTCCTAT

In100 candidate1955 (in intron):

LOCUS ENSG00000172340

DESCRIPTION Succinyl-CoA ligase [GDP-forming] beta-chain, mitochondrial  
preursor (EC 6.2.1.4) (Succinyl-CoA synthetase, betaG chain) (SCS-betaG)  
(GTPspecific

succinyl-CoA synthetase subunit beta).

[Source:Uniprot/SWISSPROT;Ac:Q96I99]

TCTTTTTTTTCATGACTCATCCTTCCTTAACATCATCTTTCTTATCCTCTGAAGCTTTCTTTTCAGAGAATCAAAATAGCT  
TTCTTCATCTTTTTTTTTCTT

In100 candidate1956 (in intron):

LOCUS ENSG00000172340

DESCRIPTION Succinyl-CoA ligase [GDP-forming] beta-chain, mitochondrial  
preursor (EC 6.2.1.4) (Succinyl-CoA synthetase, betaG chain) (SCS-betaG)  
(GTPspecific

succinyl-CoA synthetase subunit beta).

[Source:Uniprot/SWISSPROT;Ac:Q96I99]

GTCCTTTTAACTCCTTGTCTCCTTTTCCTATTTATAATGCCATTCAATATTTCCATCTTCAGATTTTCTTCTCCTGAAA  
ATCCTGTTAATACCTGACTT

In100 candidate1957 (in intron):

LOCUS ENSG00000196104

DESCRIPTION Testican-3 precursor (SPARC/osteonectin, CWCV, and Kazal-like  
domains proteoglycan 3). [Source:Uniprot/SWISSPROT;Acc:Q9BQ16]

CACCTGATCTACCTTTTGGTTTAACTATGACATATTTTTCATCTCATTTAAGTTTCTTTTAATCAATCATTTTCCAGTT  
TCTTTATGTTTTACCACTAA

In100 candidate1958 (in intron):

LOCUS ENSG00000196104

DESCRIPTION Testican-3 precursor (SPARC/osteonectin, CWCV, and Kazal-like  
domains proteoglycan 3). [Source:Uniprot/SWISSPROT;Acc:Q9BQ16]

TTTAGTTAACATGATATTTGATATTTTCTGCTTTTACTTTTATGTGTATTTATTTTATGCTGATTGTTTTCCCCAGGC  
CATAAGTTTTTGTTTCTTCA

In100 candidate1959 (in intron):

LOCUS ENSG00000183662

DESCRIPTION Protein FAM19A1 precursor (Chemokine-like protein Tafa-1).  
[Source:Uniprot/SWISSPROT;Acc:Q7Z5A9]

ATATTTTGGCATTTTTTCTCTAATATATCATAGCTAACGTTTGTCTCTGTAATTTTCCATTTTGGCTGTATTCAGCTCAT  
TTTGCCACCTATGACGTTTT

In100 candidate1960 (in intron):

LOCUS ENSG00000049323

DESCRIPTION Latent-transforming growth factor beta-binding protein, isoform1L  
precursor (LTBP-1) (Transforming growth factor beta-1-binding protein  
1)(TGFbeta1-

BP-1). [Source:Uniprot/SWISSPROT;Acc:Q14766]

GGAAATTTAACATGCTGAACACTCTTTTCATTTGCCTCTTTGTTTATTGTGTTGTTTCAGTCTTGTCTCTTATCAATTTTA  
GAAGCCTCATTCTGATTTC

In100 candidate1961 (in intron):

LOCUS ENSG00000163377

DESCRIPTION Protein FAM19A4 precursor (Chemokine-like protein TAFA-4).

[Souce:Uniprot/SWISSPROT;Acc:Q96LR4]

TTGGTCCTCATTACCTAACACCTAACATTATTTCTGTTTATCTTCTTTTCAAATTATCTCCATCCTCTAGGGTACAGGC  
ATTGTTTTTCTATGTTTGCA

In100 candidate1962 (in intron):

LOCUS ENSG00000163377

DESCRIPTION Protein FAM19A4 precursor (Chemokine-like protein TAFA-4).

[Souce:Uniprot/SWISSPROT;Acc:Q96LR4]

GAACAAGGCATCCCCCTGTACCTTTTTAGAGAAGTAAGTAAGTTTATAACAAGAGCTGCTAGTTTCTTGCATTTTCAGCT  
TTCATTTTTCTCCATCCTA

In100 candidate1963 (in intron):

LOCUS ENSG00000015171

DESCRIPTION Zinc finger MYND domain-containing protein 11 (Adenovirus 5 E1A  
binding protein) (BS69 protein). [Source:Uniprot/SWISSPROT;Acc:Q15326]



TCAATTCAAAAAATAACCTAATTAGATATTTAATCTTTCATTGCATATATATTTTTTCCTGTTTCAGCAGTAATTCCTGAT  
TTTTATCTCAGGTTTCTTTT

In100 candidate1964 (in intron):

LOCUS ENSG00000072364

DESCRIPTION AF4/FMR2 family member 4 (ALL1-fused gene from chromosome  
5q31)(Major CDK9 elongation factor-associated protein).

[Source:Uniprot/SWISSPRO;Acc:Q9UHB7]

GCTTATATTTGTAACCTGATTATGTCCATCATAAATAATTTACTCTCTTCTTTGTTTACCATTTGCCTTCAGAGAGCTAG  
TTTTGTTCTTTGTGTTTTTT

In100 candidate1965 (in intron):

LOCUS ENSG00000059377

DESCRIPTION Thromboxane-A synthase (EC 5.3.99.5) (TXA synthase) (TXS)  
(Cytochrome P450 5A1). [Source:Uniprot/SWISSPROT;Acc:P24557]

TTCTTCTTCTTCTTACAAAATAGTTTATAGCTAACTATATTTTCCTTACTCTCATTTGTTCCCTTCCCTGTATTCAGTGTCT  
CCCCATCAATATCTTTTATT

In100 candidate1966 (in intron):

LOCUS ENSG00000059377

DESCRIPTION Thromboxane-A synthase (EC 5.3.99.5) (TXA synthase) (TXS)  
(Cytochrome P450 5A1). [Source:Uniprot/SWISSPROT;Acc:P24557]

AAAATAAAACTCTGTCAATATTTCCATGTAACATTGGGTTTTGCTTTTTTTTTTTCCTCACGTAAAATCCACATATCAGGA  
ATTCCTCTATTTATTCCGTC

In100 candidate1967 (in intron):

LOCUS ENSG00000086696

DESCRIPTION Estradiol 17-beta-dehydrogenase 2 (EC 1.1.1.62) (17-beta-HSD 2)(Microsomal 17-beta-hydroxysteroid dehydrogenase) (20 alphahydroxysteroiddehydrogenase) (20-alpha-HSD) (E2DH).

[Source:Uniprot/SWISSPROT;Acc:P37059]EXON

AGAACATTGTAAGTGGACCCTGACTTCTTTCTGCCCTAGTCTTTTGAGTTTCAGATCTTTGAGTCATCTTGGATTTGTTT  
TTCCCCATGCCTCTCTCTTC

In100 candidate1968 (in intron):

LOCUS ENSG00000140945

DESCRIPTION Cadherin-13 precursor (Truncated-cadherin) (T-cadherin) (Tcad)(Heart-cadherin) (H-cadherin) (P105).

[Source:Uniprot/SWISSPROT;Acc:P55290]EXON

TATTATTAATGAAAGAGTGAGTAACGCTGCCTTATTCTCCTTTTATTTCTCACCCACTCTTTTTGTGTTCAGATCACTAG  
ATTTTAATTTTACGCCCTTT

In100 candidate1969 (in intron):

LOCUS ENSG00000140945

DESCRIPTION Cadherin-13 precursor (Truncated-cadherin) (T-cadherin) (Tcad)(Heart-cadherin) (H-cadherin) (P105).

[Source:Uniprot/SWISSPROT;Acc:P55290]EXON

TTTAGGTGTTTGTGTGTGTATATTTTTTACCAAAATGAGATCGTACCATAACGTTATTTTCAAATCTGATTTTCTCAGTT  
AACAAATCTCTATCTTTCTAT

In100 candidate1970 (in intron):

LOCUS ENSG00000140945

DESCRIPTION Cadherin-13 precursor (Truncated-cadherin) (T-cadherin) (Tcad)(  
Heart-cadherin) (H-cadherin) (P105).

[Source:Uniprot/SWISSPROT;Acc:P55290]EXON

CCATGACAATACAAATTCTTACTATTTTTTTCATAGCTATGGTAGCCTTGTAAC TTATTTACTGATTTCCCTTTTTCAGCC  
ATCTTCCTGTTGTTTTGCAA

In100 candidate1971 (in intron):

LOCUS ENSG00000140945

DESCRIPTION Cadherin-13 precursor (Truncated-cadherin) (T-cadherin) (Tcad)(  
Heart-cadherin) (H-cadherin) (P105).

[Source:Uniprot/SWISSPROT;Acc:P55290]EXON

AGTGTTCTCTTTGGTGAAATGTCTAACTATGTCTTTTGCCTATTTTTTGTTTCGTTTTGTTTTACAGGCCATTTTCAGGA  
CTTTAACTTTTGCCCATTTT

In100 candidate1972 (in intron):

LOCUS ENSG00000137090

DESCRIPTION Doublesex- and mab-3-related transcription factor 1 (DM domain  
xpressed in testis protein 1). [Source:Uniprot/SWISSPROT;Acc:Q9Y5R6]

TGAGAGAGTGGAGCGTGCTGATCATTATTAACCAAATTTAAAAAATACAACCTTTTAAATTTTCCTTTCTCTCCAGCCATT  
TTACTGAAACTCTGTTTCTT

In100 candidate1973 (in intron):

LOCUS ENSG00000137090

DESCRIPTION Doublesex- and mab-3-related transcription factor 1 (DM domain  
expressed in testis protein 1). [Source:Uniprot/SWISSPROT;Acc:Q9Y5R6]

GTTGCTCTTCTTTTCCTCATTTAACTCCCTAGAATTTCATTTCATTTCATTTCTACCTCTGAATTTCAGAAAATTTCTAA  
TCCATGCCATCTTTGCCTTT

In100 candidate1974 (in intron):

LOCUS ENSG00000030066

DESCRIPTION Nuclear pore complex protein Nup160 (Nucleoporin Nup160) (160 ka  
nucleoporin). [Source:Uniprot/SWISSPROT;Acc:Q12769]

TTGTTCATAGTGTACATACCTTAAGAATCCTTTGCCAAACCTAAGGTCATAACGATTTACTCTTATGTTTTCTTCTCAGAG  
TTTTATACTTTTAGCTTTTA

In100 candidate1975 (in intron):

LOCUS ENSG00000006459

DESCRIPTION K1718\_HUMAN Isoform 2 of Q6ZMT4 - Homo sapiens (Human)  
[Source:niprot/Varsplice;Acc:Q6ZMT4-2]

ACCTTTGCCTGAATGTACCTTGATACACACTTGGGTTGGTTTTAGGTAACCTTATATGACCTCTTTATTTTACATGCAGCT  
TTTTTCCTAGTACTTTTTTC

In100 candidate1976 (in intron):

LOCUS ENSG00000114541

DESCRIPTION FERM domain-containing protein 4B (GRP1-binding protein  
GRSP1).[Source:Uniprot/SWISSPROT;Acc:Q9Y2L6]

CCTGGTGCTTGCCAATAAATCTTTTTTTCTTAACTCCTTTTTCATATTTCTATGTTCTCCTGACCTGTGGCTTCCAGTT  
TTGTTGTTTTGTTTTAATCG

In100 candidate1977 (in intron):

LOCUS ENSG00000169933

DESCRIPTION PDZ domain containing 10 [Source:RefSeq\_peptide;Acc:NP\_055543]

EXON

CTTTGTGGTTTAGTTTGCATTTCCCTGATGACTAACGATGATGAGCATCTTTTCTTGCTTACTTACCATTTCAGGTATC  
TTCTTTGGTTAAGTGTCTTT

In100 candidate1978 (in intron):

LOCUS ENSG00000187098

DESCRIPTION Microphthalmia-associated transcription factor.

[Source:UniprotSWISSPROT;Acc:O75030]

TGTCCCTATCCTTTCTTCACCCATCCCCTTCCTAGTTTCTGGTAACTACTGTTCTGTTTTCTACTTTTATGATGTCAGCT  
TGTTTTACCCCTTAGATTTC

In100 candidate1979 (in intron):

LOCUS ENSG00000187098

DESCRIPTION Microphthalmia-associated transcription factor.

[Source:UniprotSWISSPROT;Acc:O75030]

GTCTTATAAAAGGTAGTTTAAAAATGATTTCTAACTTCTTGAGCTTCTATTTCTGCTGCAGTTTGTTTTAACAGATACT  
TTAGATTTTTTTTCATTCTTT

In100 candidate1980 (in intron):

LOCUS ENSG00000154447

DESCRIPTION SH3 domain containing ring finger 1

[Source:RefSeq\_peptide;Acc:P\_065921]

CCTCTAGGTTTTCTAGTTTATGCATGTAAAGGTGTTCATAGTAACCTCGAATGATCTTTTGTATTTCTGTGTTGTCAGTT  
GTAATGTCTCTCGTTTTGTT

In100 candidate1981 (in intron):

LOCUS ENSG00000154447

DESCRIPTION SH3 domain containing ring finger 1

[Source:RefSeq\_peptide;Acc:P\_065921]

AGTCGTGTCCTAACACATTTGCTTCTTGTTGACTTTTTTTTTCCAGTTTTTTTTGTTCTGTTTGTGTTTGTGTTTTTTTTT  
TTTAAAGAGACAGCATCTCA

In100 candidate1982 (in intron):

LOCUS ENSG00000154447

DESCRIPTION SH3 domain containing ring finger 1

[Source:RefSeq\_peptide;Acc:P\_065921]

AGGTGTAAGCCACTGTGCCCCGGCCTCTAACGTTCATTTTCTTTGTTCAAATGATTTTTCTTCCTCCTCCCAGGTGGTTTT  
TTTTTTTTTTGTATTGTTTT

In100 candidate1983 (in intron):

LOCUS ENSG00000170606

DESCRIPTION Heat shock 70 kDa protein 4 (Heat shock 70-related protein APG-)  
(HSP70RY). [Source:Uniprot/SWISSPROT;Acc:P34932]

TAACTTTCTGAGATGTTTTCCCTCCCTCTTTTGTGTTTACTGTGTTGTTCTGCTTAGTTTGGATTTTTTAATCAGTAGTT  
TTTCTTCAGTGAGTTCTTTT

In100 candidate1984 (in intron):

LOCUS ENSG00000150938

DESCRIPTION Cysteine-rich motor neuron 1 protein precursor (CRIM-1) (Cysteine-rich  
repeat-containing protein S52). [Source:Uniprot/SWISSPROT;Acc:Q9NZV1]

ATATTTCTGTTGTCCATTGTACAAATTTTAATAACTTGTCTTTCCTTTTTTTAGGTCTCTGTGTTCCAGATTTTTTTTTTG  
TAACTATGAAATCCTTGCCT

In100 candidate1985 (in intron):

LOCUS ENSG00000137601

DESCRIPTION Serine/threonine-protein kinase Nek1 (EC 2.7.11.1) (NimA-related  
protein kinase 1) (Renal carcinoma antigen NY-REN-55).

[Source:Uniprot/SWISSPROT;Acc:Q96PY6]

CTTTAAATTTTCCATAACTACTTTAATCTGTGATATTTTCCTTCTCTACATTCCTATCACATTTCTCATTATCACCAGTT  
CTTAATTTTAATTGCCCGCT

In100 candidate1986 (in intron):

LOCUS ENSG00000137601

DESCRIPTION Serine/threonine-protein kinase Nek1 (EC 2.7.11.1) (NimA-related  
protein kinase 1) (Renal carcinoma antigen NY-REN-55).

[Source:Uniprot/SWISPROT;Acc:Q96PY6]

AGTTTGTACACTACTAACCATTCACTGATGATGCTCCCTATTTTGTTTCAGTCTTTTTTTTTTCTCTGTGTGTTTCATT  
TGGGTTGTTCTATTGCTGTG

In100 candidate1987 (in intron):

LOCUS ENSG00000137601

DESCRIPTION Serine/threonine-protein kinase Nek1 (EC 2.7.11.1) (NimA-relate  
protein kinase 1) (Renal carcinoma antigen NY-REN-55).

[Source:Uniprot/SWISPROT;Acc:Q96PY6]

GAATTCTTTCCTTCTCATAACTCTTAGGACTATTTTCTGTCCTTGACGTTCTGAACTTCACTTGAATATTTCTCAGTT  
GTTTTGTTTTGTCTTACTGG

In100 candidate1988 (in intron):

LOCUS ENSG00000132670

DESCRIPTION Vacuolar protein sorting-associated protein 16 homolog (hVPS16)

[Source:Uniprot/SWISSPROT;Acc:Q9H269]

TCAAAAATAACCCTTCAATCAATTTTTTTTTTCTGGTCAAATTGGATTTTGTGTTTCTTTTATATATTCCTTGTCAGGC  
CCTACAGTTATTTTAATTTT

In100 candidate1989 (in intron):

LOCUS ENSG00000132670



DESCRIPTION Vacuolar protein sorting-associated protein 16 homolog (hVPS16)

[Source:Uniprot/SWISSPROT;Acc:Q9H269]

AAACAAACCCATAAAGTGATTACATTTCTAACTTTCGGAAGTACTCTTCAACCTCCTTTTTTTAGGTTAATTTTCAGCAC  
TCTTTCCTTCTTTCTTCCTT

In100 candidate1990 (in intron):

LOCUS ENSG00000132670

DESCRIPTION Vacuolar protein sorting-associated protein 16 homolog (hVPS16)

[Source:Uniprot/SWISSPROT;Acc:Q9H269]

CCTGTTATTTCCAATAACTTACTTCCTATGGATTCTTGTAGATTTTCTTTTTTTTTTTTTTAATTTTTTTATTTTCAGAT  
GTTTTCTCGCTTGTGTCACCA

In100 candidate1991 (in intron):

LOCUS ENSG00000198673

DESCRIPTION Protein FAM19A2 precursor (Chemokine-like protein TAFA-2).

[Souce:Uniprot/SWISSPROT;Acc:Q8N3H0]

AACACTTTATATTTTTGAATGACATAGATTCTAAGCTGATAACTGTTCCCCAATTTTCTTTTATTTCAACAGTTTTTGTGTC  
ATTCTGCATTTCTCAGATTT

In100 candidate1992 (in intron):

LOCUS ENSG00000198673

DESCRIPTION Protein FAM19A2 precursor (Chemokine-like protein TAFA-2).

[Souce:Uniprot/SWISSPROT;Acc:Q8N3H0]

ATGAAAATTTTGGGGCACCTTTAACATTTGGTACAACATTTTCTATTCCTTATTGTTTCTTTCCTCAGATATTTTTGTGTC  
CCCCATAAACAGATTTTTTTT

In100 candidate1993 (in intron):

LOCUS ENSG00000135655

DESCRIPTION Ubiquitin carboxyl-terminal hydrolase 15 (EC 3.1.2.15) (Ubiquitin thioesterase 15) (Ubiquitin-specific-processing protease 15) (Deubiquitinating enzyme 15) (Unph-2) (Unph4). [Source:Uniprot/SWISSPROT;Acc:Q9Y4E8]

TCTGTCCGTTTTGTTTCTCTTTTCAAAGAACTAACTTTTCATTTTCATTGATCTTTTTGTATTGTGTTTTTGGTCTCAGTG  
TCACTTACTTTTCCTCTGAT

In100 candidate1994 (in intron):

LOCUS ENSG00000135655

DESCRIPTION Ubiquitin carboxyl-terminal hydrolase 15 (EC 3.1.2.15) (Ubiquitin thioesterase 15) (Ubiquitin-specific-processing protease 15) (Deubiquitinating enzyme 15) (Unph-2) (Unph4). [Source:Uniprot/SWISSPROT;Acc:Q9Y4E8]

TACTTTCTTAACTCCACCCCTTATTAATTCTTACCTTTGTTGTTTTTATAGTTCCCTAACTGGTCTCCCAATCTTCAGTC  
TTTTTCTCTTCCTTAAAAGT

In100 candidate1995 (in intron):

LOCUS ENSG00000135655

DESCRIPTION Ubiquitin carboxyl-terminal hydrolase 15 (EC 3.1.2.15) (Ubiquitin thioesterase 15) (Ubiquitin-specific-processing protease 15) (Deubiquitinating enzyme 15) (Unph-2) (Unph4). [Source:Uniprot/SWISSPROT;Acc:Q9Y4E8]

GGTGATAACCCCTTTATCATTTTTTTATTGCGTCTTTTTGATTCTTCTCTCTTTTCTTCTTTATTAGTCTGGCTAGCAGTC  
TGTCTATTTTGTTTATCTTT

In100 candidate1996 (in intron):

LOCUS ENSG00000157764

DESCRIPTION B-Raf proto-oncogene serine/threonine-protein kinase (EC 2.7.111)  
(p94) (v-Raf murine sarcoma viral oncogene homolog B1).

[Source:Uniprot/WISSPROT;Acc:P15056]

GATTAAC TCATTTTGTGCTTCGTGTCTTTCATATTTTCCATTCATTTATCTCTGCCTTTTGGCTAATTTTCTCAGAATCA  
CCTTCTAGTCCTTTAATTCT

In100 candidate1997 (in intron):

LOCUS ENSG00000114861

DESCRIPTION Forkhead box protein P1. [Source:Uniprot/SWISSPROT;Acc:Q9H334]

EXON

CCCTAACTGCTGGGCTATGTTACTTTTACTTCCAGGTTTTTTGTTTTTAAATTTTCTCACTGTTAATGTCAGAATAGCCTG  
AGATCTCTTTTTTTTTTTTTC

In100 candidate1998 (in intron):

LOCUS ENSG00000114861

DESCRIPTION Forkhead box protein P1. [Source:Uniprot/SWISSPROT;Acc:Q9H334]

EXON

TTTTTTTTTACAAAAAATAGCTTTCAATTTGGTAAAAGCTATTCCTAGTAACGTTTTATAAAATCATCTTCTTTTCAGGG  
TGTGTTTTATTTTCCTTTCCA

In100 candidate1999 (in intron):

LOCUS ENSG00000182053

DESCRIPTION similar to Tripartite motif protein 49 (RING finger protein 18)(Testis-specific ring-finger protein) (LOC642569), mRNA

[Source:RefSeq\_dna;cc:XR\_016180]

ACTTGGAGTGAAGTCTCAATGATAACTGGGAAATGTTTTCTTCCTCTTTATCTAACTATATTACACTTATCCATCAGGC  
TTCATTGTATTAATCTATCC

In100 candidate2000 (in intron):

LOCUS ENSG00000006530

DESCRIPTION Acylglycerol kinase, mitochondrial precursor (EC 2.7.1.94) (EC .7.1.107) (hAGK) (Multiple substrate lipid kinase) (Multi- substrate lipid inase) (MuLK) (HsMuLK). [Source:Uniprot/SWISSPROT;Acc:Q53H12]

CCTCCACAACCTGGCTAATTTTAACTACTTTTTGATTATCACTTTTAGACCTTATCTTTGACCTCTTTGTTATACAGGCA  
TACCTCATTTTATTACACTT

In100 candidate2001 (in intron):

LOCUS ENSG00000127359

DESCRIPTION KIAA1147 (KIAA1147), mRNA [Source:RefSeq\_dna;Acc:NM\_001080392]

EXON

TTTTTCTTCTTTAATAAAATATTTAACTTTTGCATTCTGTTTTTTTCTTCTCCAGGAATACCCATGATGCATATGTTTTT  
CTCCCATTTGTCTTCCCTGTT

In100 candidate2002 (in intron):

LOCUS ENSG00000174473

DESCRIPTION polypeptide N-acetylgalactosaminyltransferase 17

[Source:RefSeqpeptide;Acc:NP\_001030017]

ATTTGTTCTACTTAAAACAATGAGGATAACTTTAGATTACCGTATTGTCTCTAGTTTTCTACCCCATTTTTTTTCAGGTA  
ACCTATATTTTCATCCTTACT

In100 candidate2003 (in intron):

LOCUS ENSG00000177990

DESCRIPTION dpy-19-like 2 [Source:RefSeq\_peptide;Acc:NP\_776173]

ATGGCTATATACCTACAAAATATGCATTATGCCAATATATGTAATAACCATAAAAATGTATTTTTTTCATTTTTTTCAGAT  
TTCAGTTACCCTTAGTTTCA

In100 candidate2004 (in intron):

LOCUS ENSG00000152767

DESCRIPTION FERM, RhoGEF and pleckstrin domain-containing protein 1

(Chondrcyte- derived ezrin-like protein). [Source:Uniprot/SWISSPROT;Acc:Q9Y4F1]

CTTTAATCTGTTGCATGTAACATTTTCTTTGGATGTTTCATCTGTCATTTTTCTTTTTTCTTGCAGCATCTTTGTAAAGGT  
TTTTTTGTTTGTTTGTTTTT

In100 candidate2005 (in intron):

LOCUS ENSG00000163412

DESCRIPTION eukaryotic translation initiation factor 4E member 3

[Source:ReSeq\_peptide;Acc:NP\_775495]

AGTTATTGCTGTGTTGTTCTTTAACTACTGAGGTCCCTAACTGGTATTCCACTTTTTGGCCTCTTTCAGAGTCTTCTTAT  
GTTTATTTTATATAATGTTC

In100 candidate2006 (in intron):

LOCUS ENSG00000163412

DESCRIPTION eukaryotic translation initiation factor 4E member 3

[Source:ReSeq\_peptide;Acc:NP\_775495]

AAAGTTTTGTTTTCTTTTGGGGTAGTTCCTTCTGAATGCTCCTGAAGTAACATTTAGAATACTATTTTCTTCCCAGCT  
TTCAGTTAAGTTTTTCTTTT

In100 candidate2007 (in intron):

LOCUS ENSG00000164104

DESCRIPTION High mobility group protein B2 (High mobility group protein 2)

HMG- 2). [Source:Uniprot/SWISSPROT;Acc:P26583]

GAAAAAGGACCCCAATGCTCCTAAAAGGCCACCGTAAGTTTAAAATAACCCAAATTGCTCCTTGGATTTTTCCTTCAGTT  
TATTAAACTCTGTTGCTTCC

In100 candidate2008 (in intron):

LOCUS ENSG00000008869

DESCRIPTION HEAT repeat containing 5B

[Source:RefSeq\_peptide;Acc:NP\_061897]EXON

CCCAAGACGCTGTTAGGTTTTGGTTCCTCTCCCACTTCACTAACTACTACTTCTTGTTCTTTTTTAACTCTTCCTCAGTT  
CAGGGCATTTTTTTTTTTTTT

In100 candidate2009 (in intron):

LOCUS ENSG00000008869

DESCRIPTION HEAT repeat containing 5B

[Source:RefSeq\_peptide;Acc:NP\_061897]EXON

TTGACCTTTCTTTCTTTGGATTTCTTAACTGTTATTTTCTTCCTCATTGTGTCTTGCCTTTTACCTTAGTTCTCAGAG  
ATCCTCACAGGTTTTTTCTT

In100 candidate2010 (in intron):

LOCUS ENSG00000179087

DESCRIPTION Maltase-glucoamylase, intestinal [Includes: Maltase (EC 3.2.1.2) (Alpha-glucosidase); Glucoamylase (EC 3.2.1.3) (Glucan 1,4-alpha- glucosidase)].

[Source:Uniprot/SWISSPROT;Acc:O43451]

GTAACCTTTTCCAAAATATGTGCCTCTTTCTGGCCCACTTTAATTCTCTCTGCCTTCGTGGTTGTTATTCTTCACCAGAA  
TGACTTGATCTCCTTTCTTT

In100 candidate2011 (in intron):

LOCUS ENSG00000196935

DESCRIPTION SLIT-ROBO Rho GTPase-activating protein 1 (srGAP1) (Rho GTPaseactivating

protein 13). [Source:Uniprot/SWISSPROT;Acc:Q7Z6B7]

TGTTTGTTCCATGACATGTCGTTTCTTCCTAACTGGTCTGTAGCTTCTTTCCTTTCTATCTCTTTTAGATTGCTGCAGAT  
TCACATTTATCATGTTTCTT

In100 candidate2012 (in intron):

LOCUS ENSG00000163602

DESCRIPTION RING1 and YY1-binding protein (Death effector domainassociatedfactor)

(DED-associated factor) (YY1 and E4TF1-associated factor 1)

(Apopti-associating protein 1) (APAP-1). [Source:Uniprot/SWISSPROT;Acc:Q8N488]

CTGAAGTTTTTCCCTCAAGTTCTGCTTTAGTTGTAACCCACAAATTTGATATTTTGTGTTTTTCATTTTCATTCAGTT  
TCAGATGCTTTCTAATTTTT

In100 candidate2013 (in intron):

LOCUS ENSG00000006837

DESCRIPTION Cyclin-dependent kinase-like 3 (EC 2.7.11.22)

(Serine/threonineprotein kinase NKIAMRE). [Source:Uniprot/SWISSPROT;Acc:Q8IVW4]

CTAACATTTCCATCACTCTCCAAAATTTCAATTGTGTCCTTTTACAATTCATCTTTTCTTCCATTTCTGTCCCCAGATAAC  
CACTGATTTGCTTTCTATTC

In100 candidate2014 (in intron):

LOCUS ENSG00000103194

DESCRIPTION Ubiquitin carboxyl-terminal hydrolase 10 (EC 3.1.2.15) (Ubiquitin thioesterase 10) (Ubiquitin-specific-processing protease 10) (Deubiquitinating enzyme 10). [Source:Uniprot/SWISSPROT;Acc:Q14694]

TTAAAAATATCTTTAGGAAATTCTTCCCATCCTTTAGATAACGAAGATATTTGTCTGTTTTCTTCTAAAAGTTTTCAGAT  
TTTGTTTTACGCTTCAGTG

In100 candidate2015 (in intron):

LOCUS ENSG00000119048



DESCRIPTION Ubiquitin-conjugating enzyme E2 B (EC 6.3.2.19) (Ubiquitin-protein ligase B) (Ubiquitin carrier protein B) (HR6B) (hHR6B) (E2-17 kDa).

[Source:Uniprot/SWISSPROT;Acc:P63146]

CCACTCTCTGTTATGGTTTGCTCCATGAAATGGTATCTGTAAACATTTAAATGAATTTACTCTTTGTTTTACATAGCAGTT  
CACTTCTAGAAATTTTTTCT

In100 candidate2016 (in intron):

LOCUS ENSG00000102572

DESCRIPTION Serine/threonine-protein kinase 24 (EC 2.7.11.1) (STE20-like kinase MST3) (MST-3) (Mammalian STE20-like protein kinase 3).

[Source:Uniprot/WISSPROT;Acc:Q9Y6E0]

TCTATTTCCCTAGGATAAACTAACTGGAAGTGGGGTTTTTGCCTTTTGCTTATTTTCATTTTCAGGTATGGAACATCTTT  
TCTGATCACTTTTCCATCTT

In100 candidate2017 (in intron):

LOCUS ENSG00000172986

DESCRIPTION similar to CG9996-PA [Source:RefSeq\_peptide;Acc:NP\_001073862]

GAAGTTGTTTTGATGATAACAATTTACACTTTCTCTAGCTTTTTTCACATTTCTCTCTCTTCTTGCTTATAAACAGTT  
TCTCTCTATATACCTTTTTTC

In100 candidate2018 (in intron):

LOCUS ENSG00000163605

DESCRIPTION protein phosphatase 4, regulatory subunit 2

[Source:RefSeq\_peptide;Acc:NP\_777567]

AGCCAAATACTACCTTTATGAATTTTTCCACATTCTTGTAACATCTGTACAATTACTTCTTTAATGCTTTTTTTCAGGTC  
AGCTGAGTTTTTTTCCCTCA

In100 candidate2019 (in intron):

LOCUS ENSG00000183735

DESCRIPTION Serine/threonine-protein kinase TBK1 (EC 2.7.11.1) (TANK-binding kinase 1) (T2K) (NF-kappa-B-activating kinase).

[Source:Uniprot/SWISSPROT;cc:Q9UHD2]

AGCCTAACCTGTCCAACCATTTCTTTTAGGTCTTAACATATTTCTCAGACCTTTATATATTTGGCCCTATCTTTTGTTTTG  
TTTGTTTTGTTTTTTTGAGA

In100 candidate2020 (in intron):

LOCUS ENSG00000121440

DESCRIPTION PDZ domain-containing RING finger protein 3 (Ligand of Numbprotein X 3) (Semaphorin cytoplasmic domain-associated protein 3) (Protein SEMAAP3). [Source:Uniprot/SWISSPROT;Acc:Q9UPQ7]

AGTTCTCATGACTGCCTTTGTAACACTTGTCTGTTTTCCATTTTTCCTTATGTCTTCACCAGCATCTGTTGTCCTGCTTT  
TTGTTTTATCTTTTCTTTC

In100 candidate2021 (in intron):

LOCUS ENSG00000121440

DESCRIPTION PDZ domain-containing RING finger protein 3 (Ligand of Numbprotein X 3) (Semaphorin cytoplasmic domain-associated protein 3) (Protein SEMAAP3). [Source:Uniprot/SWISSPROT;Acc:Q9UPQ7]

AGCACTCTTGATAAAGTAAAGATAATTAGAAATTATAGTCAAGTAATAACCTTTTCCATTTATCTGGTTTTCTTCAGAGC  
TTTATCCCTTATCTGATCTT

In100 candidate2022 (in intron):

LOCUS ENSG00000113805

DESCRIPTION Contactin-3 precursor (Brain-derived immunoglobulin  
superfamilyprotein 1) (BIG-1) (Plasmacytoma-associated neuronal glycoprotein).  
[SourceUniprot/SWISSPROT;Acc:Q9P232]

AACAAAGGTAAAATCATATTACCACAATGTCAAGATAACCCTCATTTTGGTCTATTTATTCTCAGTCTTATTTTTTTCCT  
TACACATTTTCCCCATAATT

In100 candidate2023 (in intron):

LOCUS ENSG00000150625

DESCRIPTION Neuronal membrane glycoprotein M6-a (M6a).  
[Source:Uniprot/SWISPROT;Acc:P51674]

AAAGTCTTACAAATACTATATTTTAACATTTAGTATTATCTCTGCTCCTGTAAGTATTTTATTTAGTTTCAGAGCTCTACTTT  
CTTACTCAACTAAATATTTT

In100 candidate2024 (in intron):

LOCUS ENSG00000150625

DESCRIPTION Neuronal membrane glycoprotein M6-a (M6a).  
[Source:Uniprot/SWISPROT;Acc:P51674]

AGGCGTGAGCCACTGCACACTGCCAAGTTTATTTTTTAAACCATAGTTTGAAGTCTTAGGCTTATTTCTCAGAGTTTATT  
TATTTATTTGTCTTGCATCT

In100 candidate2025 (in intron):

LOCUS ENSG00000150625

DESCRIPTION Neuronal membrane glycoprotein M6-a (M6a).

[Source:Uniprot/SWISPROT;Acc:P51674]

ACTCATTATATAACTCATTATAGTCATTTGTATAACTTTTAGTACTTCTCTGTCTCTTGTCTATTTTCTTCCCCAGAA  
GCTTTTAATCCCTTAATTTT

In100 candidate2026 (in intron):

LOCUS ENSG00000080608

DESCRIPTION KIAA0020 (KIAA0020), mRNA [Source:RefSeq\_dna;Acc:NM\_014878]

TATCCATTAGTTAAATCTCTTAGTTTTAACTTTTTATTAACCTCTTCCCTCTTCACTAGCTTTTAGGTTCTATGCAGTA  
GTCTGCATTTCTTTTTGTCC

In100 candidate2027 (in intron):

LOCUS ENSG00000156076

DESCRIPTION Wnt inhibitory factor 1 precursor (WIF-1).

[Source:Uniprot/SWISPROT;Acc:Q9Y5W5]

TTTGTTTGGGTCTTTAACATTGAACTATTTTCCTTTCTTGCTTATTTTAGATTTTTTCTGGCCCTTCACTTACAGCGTAC  
GATCTATTTTACATCTCTTT

In100 candidate2028 (in intron):

LOCUS ENSG00000150627

DESCRIPTION WD repeat protein 17. [Source:Uniprot/SWISSPROT;Acc:Q8IZU2]

GTTCTCCTTTGACATTTAACATATTATTTTCTCTATTATTTTATTATTGTATCTCTTTGCTTGGTTGTCTTTTCAGAC  
TCCTTTTTCTTTCCTGTACT

In100 candidate2029 (in intron):

LOCUS ENSG00000174106

DESCRIPTION Inner nuclear membrane protein Man1 (LEM domain-containing protein  
3). [Source:Uniprot/SWISSPROT;Acc:Q9Y2U8]

ATATAAACTATATATGTATATAAGTGAAGTCATAACTTTTAACTGCTCTTTTTTTTCCAGTTTTTGCCTGCCTCCTCTT  
ACTAAGACCTTCTATTTAT

In100 candidate2030 (in exon):

LOCUS ENSG00000196454

DESCRIPTION

CGTCATCAATAACATATTCATATATTTTCGATAGTACTATGTTTGGTTTTCTTCCCATTTCAGGGATCCTTTTGTCTTACT  
ATAAAATTGTCCCCTCCATT

In100 candidate2031 (in intron):

LOCUS ENSG00000046653

DESCRIPTION Neuronal membrane glycoprotein M6-b (M6b).

[Source:Uniprot/SWISPROT;Acc:Q13491]

AAAAAAAAAAGCACCTCTCGTATTTTCATTTTTGCTTTTTCTTAACAATACCTTTGGCCATTTTTTTCCAGTTCACTAT  
GTTTGTATACTAACTTTTCT

In100 candidate2032 (in intron):

LOCUS ENSG00000174099

DESCRIPTION methionine sulfoxide reductase B3 isoform 1

[Source:RefSeq\_peptide;Acc:NP\_932346]

GTCCATTTCTAATAGAGGGGTGTTGAAGTCTCTAACTATAATAATGGATTTGTCTGTTTCTCTTTGAAGTTCTATCAGTT  
TTTGCCTCGTGTATTTTGAT

In100 candidate2033 (in intron):

LOCUS ENSG00000174099

DESCRIPTION methionine sulfoxide reductase B3 isoform 1

[Source:RefSeq\_peptide;Acc:NP\_932346]

TTTCTTTTATTCTCTCTGACTGTATTTTTTAAGATAACTTGTCTTTGAGTTCATAGATTCTTTCTTCTGCTTAATCAGTT  
CTTTTTACTTCTCTATGGGT

In100 candidate2034 (in intron):

LOCUS ENSG00000185736

DESCRIPTION Double-stranded RNA-specific editase B2 (EC 3.5.-.-) (dsRNA  
adenosine deaminase B2) (RNA-dependent adenosine deaminase 3) (RNA-editing  
deaminase 2) (RNA-editing enzyme 2). [Source:Uniprot/SWISSPROT;Acc:Q9NS39]

GTTCTCAATACTCCCTGCCCCTTTAACATCTTGACCCACACTAGCTTTTTTATCATTCTGTGCTTCCAGGCTCTCTGAGA  
CCCTATCAGATTTATTCTTT

In100 candidate2035 (in intron):

LOCUS ENSG00000185736

DESCRIPTION Double-stranded RNA-specific editase B2 (EC 3.5.-.-) (dsRNA  
adeosine deaminase B2) (RNA-dependent adenosine deaminase 3) (RNA-editing  
deamnase 2) (RNA-editing enzyme 2). [Source:Uniprot/SWISSPROT;Acc:Q9NS39]  
CTTATCATATCCCCTTTATTTTAAATTCTTAAAAATATTTCTAACATCTATTTAATGTCCTTATCTGCTAATTTTCAGCA  
TCATTAGATCTTTTTACTTC

In100 candidate2036 (in intron):

LOCUS ENSG00000185044

DESCRIPTION Zinc finger protein 717. [Source:Uniprot/SPTREMBL;Acc:Q5XG89]  
CTCTAGATAATGTTTAATATTTTCTCACATGACACATCTGCTGGTAACAAGTTTCCTCAACTTTTGTTTGTCCAGGGAAT  
GTTTTATTTCTCATTTACTT

In100 candidate2037 (in intron):

LOCUS ENSG00000080298

DESCRIPTION Transcription factor RFX3. [Source:Uniprot/SWISSPROT;Acc:P48380]  
CTTTAACACACTTTCATCATTGTGTTTTATTTTGTCTTCTATTTTGAGCGCTTCGCTTTCCTACACTGCAGGATGCTCC  
AGATTCGCCTTTTATATTTTC

In100 candidate2038 (in intron):

LOCUS ENSG00000080298

DESCRIPTION Transcription factor RFX3. [Source:Uniprot/SWISSPROT;Acc:P48380]  
TATCAACTATGGAAAAAGAATGCTGAAGTCTCCAATTGTAAGTGGATTTTTAAATTTCTTCTTTCCGTTATATCAGTT  
TTTGCTTCATGTCTTCTGAA

In100 candidate2039 (in intron):

LOCUS ENSG00000080298

DESCRIPTION Transcription factor RFX3. [Source:Uniprot/SWISSPROT;Acc:P48380]

AAGAAAACAAAAATCCCTATAACTTACCTAAAAATTTATTATTTCTGATGTTCTCATTTCTTTATGTAGATCTCAGTT  
TCCATCTAGTATTCTTTTTC

In100 candidate2040 (in intron):

LOCUS ENSG00000169855

DESCRIPTION Roundabout homolog 1 precursor (H-Robo-1) (Deleted in U twenty  
twenty). [Source:Uniprot/SWISSPROT;Acc:Q9Y6N7]

TGAGGAAGGAGTAACTTCTTCTGGAATGAGAAGTTTCTCACTTCTTCCTCTTCTTTCCAGTCACATCATTTCTTTCTTCC  
CTTAGCGGCATTTCAATTTT

In100 candidate2041 (in intron):

LOCUS ENSG00000155957

DESCRIPTION Transmembrane BAX inhibitor motif-containing protein 4 (Z-proten)  
(SlR protein). [Source:Uniprot/SWISSPROT;Acc:Q9HC24]

GCAAGTTGTTTATCCTTATAGTTAATATATTTAACTCTTCCTACTTTGTCATTAGTTTTTTTAACTTTCTATGCCAGTT  
TTGTTTAATCTGTATGTTTT

In100 candidate2042 (in intron):

LOCUS ENSG00000090376



DESCRIPTION Interleukin-1 receptor-associated kinase 3 (EC 2.7.11.1) (IRAK-)  
(IL- 1 receptor-associated kinase M) (IRAK-M).

[Source:Uniprot/SWISSPROT;cc:Q9Y616]

ATAACCCCCTCAAAAAGCCTATTTTTATCTTTCAGAAAAATTTAGATATATATAATTCTTTTTCCTCAGATTTTTCCTG  
TTTCCCCCAGTGCCTCCCC

In100 candidate2043 (in intron):

LOCUS ENSG00000159763

DESCRIPTION Prolactin-inducible protein precursor (Prolactin-induced protei)  
(Secretory actin-binding protein) (SABP) (Gross cystic disease fluid protin 15)  
(GCDFP-15) (gp17). [Source:Uniprot/SWISSPROT;Acc:P12273]

AGGCTGTAATTAGTAGTTAGTCTTCATCTAACATGCTGATCCACATCTTGTTTCATAATTTATACCTTTGTTTCAGATTTCT  
GCTCAGTAACTTTACCTTC

In100 candidate2044 (in intron):

LOCUS ENSG00000175161

DESCRIPTION immunoglobulin superfamily, member 4D

[Source:RefSeq\_peptide;Ac:NP\_694854]

ATGTTAACTTAACTCATAATCTTTATATGGCCTTTTCTTTTCACCTCTATTGCCATAACCTTGTTTGAATCCTTGCACTC  
TTTCATCTTTACTACTGCTA

In100 candidate2045 (in intron):

LOCUS ENSG00000109716

DESCRIPTION Teneurin-3 (Ten-3) (Tenascin-M3) (Ten-m3) (Protein Odd  
Oz/tenmhomolog

3). [Source:Uniprot/SWISSPROT;Acc:Q9P273]

TTTACCTATATTACTACTTTTAGTCAAGTAATTCTAATATAAAGTTAACAAAAATAATTCAATTCTACTATCTTCAGGT  
GTTTTTAATTGCTCTAACTT

In100 candidate2046 (in intron):

LOCUS ENSG00000109716

DESCRIPTION Teneurin-3 (Ten-3) (Tenascin-M3) (Ten-m3) (Protein Odd  
Oz/tenmhomolog

3). [Source:Uniprot/SWISSPROT;Acc:Q9P273]

GGTCTATGTAGTATTTCCCCTCTTACTGCTACTGTTTTTATAACTAGTTGTATTATTTTCTGCTGATTTGCAGATGGGTTT  
CGTGCATTTTCTAATTTTCCT

In100 candidate2047 (in intron):

LOCUS ENSG00000109716

DESCRIPTION Teneurin-3 (Ten-3) (Tenascin-M3) (Ten-m3) (Protein Odd  
Oz/tenmhomolog

3). [Source:Uniprot/SWISSPROT;Acc:Q9P273]

CACTAACCTTAAATCTGGCTTTATCTTATGTTTCACACTTTTATTTTCTTGTATTCTATCTTTATTTTGGCAGTGTG  
TACTTTATCTTGTTACACTT

In100 candidate2048 (in intron):

LOCUS ENSG00000167258

DESCRIPTION Cell division cycle 2-related protein kinase 7 (EC 2.7.11.22)  
(DC2- related protein kinase 7) (Cdc2-related kinase, arginine/serine-rich)  
CrkRS). [Source:Uniprot/SWISSPROT;Acc:Q9NYV4]

TTACACTGCTGTTACCTACTTTTACTAACTTTTTTGGTTATTTTTGTTTTCTTATTCTTTACATTTCCCACAGTCTTTG  
CCTTCCCATTTTAATCCTTT

In100 candidate2049 (in intron):

LOCUS ENSG00000154118

DESCRIPTION Junctophilin-3 (Junctophilin type 3) (JP-3).

[Source:Uniprot/SWSSPROT;Acc:Q8WXH2]

GCAATGGAGTCTGATTCTGTACACTTCTCATGCATAACTTGAGTTAGTAATTGTCTCGCTTTTTTTTCAGTTGCAATTTTC  
TTTAAATCACTGGTTCTTTT

In100 candidate2050 (in intron):

LOCUS ENSG00000107249

DESCRIPTION Zinc finger protein GLIS3 (GLI-similar 3) (Zinc finger protein

15). [Source:Uniprot/SWISSPROT;Acc:Q8NEA6]

TGAAATTATATCACCCCTTTCATTCCTATTATTATTAACACATGTCATCTTCTTTTTCTTTATTAGCCTAGGCAGCAATT  
TGTTAACTTTATTATTCTTC

In100 candidate2051 (in intron):

LOCUS ENSG00000107249

DESCRIPTION Zinc finger protein GLIS3 (GLI-similar 3) (Zinc finger protein

15). [Source:Uniprot/SWISSPROT;Acc:Q8NEA6]

ATGCATTTTGTAGTTTTTAATTTTCCACAAATTATTCTGTAATTAACTAAAGAAGACTTCCTTTTTCTTCAGGAAAGTCC  
TTCTTGACTGTTTCTTGCTT

In100 candidate2052 (in intron):

LOCUS ENSG00000107249

DESCRIPTION Zinc finger protein GLIS3 (GLI-similar 3) (Zinc finger protein

15). [Source:Uniprot/SWISSPROT;Acc:Q8NEA6]

GTTAAGGTATTTAGGATGTCCCACAACCAAGCACAAATATGTTTTTTATTTAACTATAGTCACCTTATTCTGTTACCAGAC  
ATTGAATTTATTCCTTCTAT

In100 candidate2053 (in intron):

LOCUS ENSG00000106144

DESCRIPTION Caspase-2 precursor (EC 3.4.22.-) (CASP-2) (ICH-1 protease) (IC-  
1L/1S) [Contains: Caspase-2 subunit p18; Caspase-2 subunit p13; Caspase-2subunit  
p12]. [Source:Uniprot/SWISSPROT;Acc:P42575]

CTTCCTTTCTGAGAACTCTTACTCTTTTCTGTGCTTCATTAACCTCTGGTGCCCTTTTTTTGGTTACTCATTCCAGTTACG  
GATTTTTTGATCTGTCTTTTT

In100 candidate2054 (in intron):

LOCUS ENSG00000134882

DESCRIPTION phosphoglycerate dehydrogenase like 1  
[Source:RefSeq\_peptide;Ac:NP\_808882]

AGTGTC AACATTCCTGTGGTTTGATATTTCTTTTATAACCTGATAACATTTGATTCACATTTCACTTCCAGCACTATTAC  
TTTTTGTTGCTTTGCTGTAT

In100 candidate2055 (in intron):

LOCUS ENSG00000184500

DESCRIPTION Vitamin K-dependent protein S precursor.

[Source:Uniprot/SWISSPOT;Acc:P07225]

CATGACCTCACACAAACATTAAGCAATAACCTGTGCATTTTGATTTTCTTGTTGTTTATTTGGTTTCTTTTATTCCAGGT  
TGTTTCAGTGTGCCTTCCCT

In100 candidate2056 (in intron):

LOCUS ENSG00000184500

DESCRIPTION Vitamin K-dependent protein S precursor.

[Source:Uniprot/SWISSPOT;Acc:P07225]

ACACATTTTCTTTCTGTAGAATCTTCTGGTAAATGTTCTATAACGTGCTGGTGGCAATCCCTGGTTTTTCTTTCTCAGGG  
CCTCTTCATTTATTTTATCC

In100 candidate2057 (in intron):

LOCUS ENSG00000166693

DESCRIPTION Seven transmembrane helix receptor.

[Source:Uniprot/SPTREMBL;Ac:Q8NH86]

TGTTTTCTTATAATTTCTTTTTTTAACATTTTCTTTCTTTAAATATTTTTTTTAAATTCCTTATTTCTCAGAGATCTTT  
GTTCTGACCTGTAATTTCTT

In100 candidate2058 (in intron):

LOCUS ENSG00000127314

DESCRIPTION Ras-related protein Rap-1b precursor (GTP-binding protein smg  
p1B). [Source:Uniprot/SWISSPROT;Acc:P61224]

TTCTTCATAACCACCCCATATAAAACCATCCATTCTTATCTCTTTTTTTTTTTCTCCATACTGCTTATCACAGCTGACACT  
TTATACTGACTTTGTTTCCC

In100 candidate2059 (in intron):

LOCUS ENSG00000127314

DESCRIPTION Ras-related protein Rap-1b precursor (GTP-binding protein smg p1B). [Source:Uniprot/SWISSPROT;Acc:P61224]

AGCCGCCTTTAACTTCTTGAAGGTTGTCATCTTAAAATTTCTTTCAGAGTTTTTCTGTTGATTATAGTTTTTGTTTTTC  
TTCCAAAATCTCTTCACTTT

In100 candidate2060 (in intron):

LOCUS ENSG00000080224

DESCRIPTION Ephrin type-A receptor 6 precursor (EC 2.7.10.1) (Tyrosine-protein kinase receptor EHK-2) (EPH homology kinase 2).

[Source:Uniprot/SWISSPRO;Acc:Q9UF33]

GATTCTTCTAACCCATGAACATGGAATATTTTCCATTTTTTGTTGTAATCTTCATTTTCCTTCATCAGTGTTTTATAGT  
TTTCATTATAGATCTCCTTC

In100 candidate2061 (in intron):

LOCUS ENSG00000080224

DESCRIPTION Ephrin type-A receptor 6 precursor (EC 2.7.10.1) (Tyrosine-protein kinase receptor EHK-2) (EPH homology kinase 2).

[Source:Uniprot/SWISSPRO;Acc:Q9UF33]

TTTAACTTTTCAAAAAATGAGCTTCTGTTTCATTGATCTTTTGTATTTTTTTTCATTTCAATTTCAATTTATTTTCAGCT  
GTGATCTTTATTGTTTCTTC

In100 candidate2062 (in intron):

LOCUS ENSG00000080224

DESCRIPTION Ephrin type-A receptor 6 precursor (EC 2.7.10.1) (Tyrosine-protein kinase receptor EHK-2) (EPH homology kinase 2).

[Source:Uniprot/SWISSPRO;Acc:Q9UF33]

ATAATTTT TAGTCTTTGGGGACATATTTCTTTCTTCTAACTTGTTTCTTTATGCATATCATTTTTTCCCTGCTACCAGAT  
TCTAAGATTTCTTTGCTTTC

In100 candidate2063 (in intron):

LOCUS ENSG00000080224

DESCRIPTION Ephrin type-A receptor 6 precursor (EC 2.7.10.1) (Tyrosine-protein kinase receptor EHK-2) (EPH homology kinase 2).

[Source:Uniprot/SWISSPRO;Acc:Q9UF33]

TTACTTTCCCAATTTGTAACTATAAATATTTTCTTACATTGTTTTGTATCCTTTATTTTCTTTCCCCAGCTATTGATTGT  
TTCTTCTGGGACTCTATTTTC

In100 candidate2064 (in intron):

LOCUS ENSG00000080224

DESCRIPTION Ephrin type-A receptor 6 precursor (EC 2.7.10.1) (Tyrosine-protein kinase receptor EHK-2) (EPH homology kinase 2).

[Source:Uniprot/SWISSPRO;Acc:Q9UF33]

TAACCTAAAAATTAATCTCCTCTTCATTTTTATTTTCATGTTTATTTCTCGACAAGCCTGTTCCACTATCCAGTATTTATG  
TTTGCCAGCAATTCTTTTCT

In100 candidate2065 (in intron):

LOCUS ENSG00000198420

DESCRIPTION

AATAACTCTCCCACAATCTTTCTATTATATCTATTTGAACCTCAGATCAGATGTGTCTTAGGTCTTCTCACTATATGCTC  
TATATCGTCTATCCTTTTTC

In100 candidate2066 (in intron):

LOCUS ENSG00000130234

DESCRIPTION Angiotensin-converting enzyme 2 precursor (EC 3.4.17.-) (ACEreated  
carboxypeptidase) (Angiotensin-converting enzyme homolog) (ACEH).

[Souce:Uniprot/SWISSPROT;Acc:Q9BYF1]

GCATTAGACAAGATTTACAAGTTGTCTTCAAATGCTTTTTTTTTTTAACCGACTTCCACATTGTCATTCTTTTCCAGAT  
TTCCTTGACCTCTCTGATTG

In100 candidate2067 (in intron):

LOCUS ENSG00000125246

DESCRIPTION citrate lyase beta like [Source:RefSeq\_peptide;Acc:NP\_612124]

AGTTATGTATTGTAACATACTGCATCTTTTGACCCTGTCTTCTCTGTTTCAACAGAGCTTATCTTTTTCTATGTATTTCT  
GCTGCTACTGCTTTTCCAAA

In100 candidate2068 (in intron):

LOCUS ENSG00000196511



DESCRIPTION Thiamin pyrophosphokinase 1 (EC 2.7.6.2) (Thiamine pyrophosphoknase 1) (hTPK1) (Placental protein 20) (PP20).

[Source:Uniprot/SWISSPROT;Ac:Q9H3S4]

TCTATATCTAGTATACACCTAGGAATAAAATTGCCATATGTTTTTATTGTAACTCCATGTTTAATCATTTATTGCCAGAT  
TGTTTTCTCCTCTATTCAGA

In100 candidate2069 (in intron):

LOCUS ENSG00000167635

DESCRIPTION Zinc finger protein OZF (Only zinc finger protein) (Zinc fingerprotein 146). [Source:Uniprot/SWISSPROT;Acc:Q15072]

GGGAGCCACTACACCTGGACTCATTCTTAAGTTATAATTAACATAATATCAATTCTTATTTTGGCATCTCCAGAGTTTC  
TGTCTTGCCTTACACAACTT

In100 candidate2070 (in exon):

LOCUS ENSG00000197621

DESCRIPTION Olfactory receptor 5H6. [Source:Uniprot/SWISSPROT;Acc:Q8NGV6]

ACTGTGACATTATCCCATTGTTAAAGATTTCTGTACTGATTCCTCTATTAACTTTCTAATGGTTTTTATTTTCGCAGGT  
TCTGTTCAAGTTTTTACCAT

In100 candidate2071 (in intron):

LOCUS ENSG00000174469

DESCRIPTION Contactin-associated protein-like 2 precursor (Cell recognitionmolecule Caspr2). [Source:Uniprot/SWISSPROT;Acc:Q9UHC6]

CTATGAGATTGCTTCAAAGTTACTAACTCAAGATATATTTGAGATTTTCCATTTTGCCCCCTTCTGCAGATAGCTGATGT  
AATTCCTGCATTTCTTCTT

In100 candidate2072 (in intron):

LOCUS ENSG00000174469

DESCRIPTION Contactin-associated protein-like 2 precursor (Cell  
recognitionmolecule Caspr2). [Source:Uniprot/SWISSPROT;Acc:Q9UHC6]

CCCTCATTTCACTGTTTCAATAACAATACATTTACTAACTAGTTCATTGCTTCTCTGTTACCAGACTATCTCTCAACAA  
TTATTTCAACCATTGCTTTT

In100 candidate2073 (in intron):

LOCUS ENSG00000174469

DESCRIPTION Contactin-associated protein-like 2 precursor (Cell  
recognitionmolecule Caspr2). [Source:Uniprot/SWISSPROT;Acc:Q9UHC6]

ATAATTTAATTAATTTACATTCAAAGTAATTATTGATAGGTAATAACTTACTACACTATATTGTTTCATTGTTTCCCAGTT  
GTTTTGAAGATTCTTTCTTC

In100 candidate2074 (in intron):

LOCUS ENSG00000174469

DESCRIPTION Contactin-associated protein-like 2 precursor (Cell  
recognitionmolecule Caspr2). [Source:Uniprot/SWISSPROT;Acc:Q9UHC6]

AGTATACTGTTAACCACATCAAAGTTACTTTTATTTCTGTTACAGTGTTTTTTAGCTCTAGCATTTCTCTTTAGCTCTTA  
AGATTTCCATCTCTCTGCTT

In100 candidate2075 (in intron):

LOCUS ENSG00000174469

DESCRIPTION Contactin-associated protein-like 2 precursor (Cell  
recognitionmolecule Caspr2). [Source:Uniprot/SWISSPROT;Acc:Q9UHC6]

AGGAAATTAACATTATTTCACTAGTTCTTTCTAATCCTCAGATTCATTTGAGTTTCACCAGTTGTCCCAAGAGTATTCT  
TTTTTTTTTTTTTTTTTTTTTTT

In100 candidate2076 (in intron):

LOCUS ENSG00000174469

DESCRIPTION Contactin-associated protein-like 2 precursor (Cell  
recognitionmolecule Caspr2). [Source:Uniprot/SWISSPROT;Acc:Q9UHC6]

AGACATATTTAGAATTTTCTAACTTGTAGTGAATTTACCTTTTTTCATTGTATACTAACCTTCCTTATCTCTCAGAGC  
GCCTTTTTCCTTGTGTTGTC

In100 candidate2077 (in intron):

LOCUS ENSG00000174469

DESCRIPTION Contactin-associated protein-like 2 precursor (Cell  
recognitionmolecule Caspr2). [Source:Uniprot/SWISSPROT;Acc:Q9UHC6]

CTGACCTATATCATTTTTGTTTCCTCTGAATAACTTCATTTAACATTTTTTTTTTGCAAGTCAGATCTACTGGCAACAAATT  
TCCTCTATCTTTATTTGTCT

In100 candidate2078 (in intron):

LOCUS ENSG00000174469

DESCRIPTION Contactin-associated protein-like 2 precursor (Cell  
recognitionmolecule Caspr2). [Source:Uniprot/SWISSPROT;Acc:Q9UHC6]

CTATTGCTTCTATAACTCCATTTACATTCATTTACATTTCACTTTTCAGCATCATCACTCTCTGTTTCTTGATGCACTTT  
TATCTTAGTTAGCCAATTCT

In100 candidate2079 (in intron):

LOCUS ENSG00000094880

DESCRIPTION Cell division cycle protein 23 homolog (Anaphase-promoting complex subunit 8) (APC8) (Cyclosome subunit 8). [Source:Uniprot/SWISSPROT;Acc:QIJX2]

AGAATGCTACCTTTTAAACCCTTGAGGTACCTGTTTTTTTTTTTTTGAGACAGAATCATACCTCTTTTTTTCCTTTTTTTT  
TAAGATGTTGTTTTGCTCTA

In100 candidate2080 (in intron):

LOCUS ENSG00000181007

DESCRIPTION Zinc finger protein 545. [Source:Uniprot/SWISSPROT;Acc:Q8N141]

EXON

GCTTTATTACTTCTATTTCTGTATTCTAACTAATTCTGCTTTTATATCGGTTAATATTTTTCTTCTGCTTTACTTCAGCT  
TAATTTTATTTTCTTTTTTTT

In100 candidate2081 (in intron):

LOCUS ENSG00000088812

DESCRIPTION Attractin precursor (Mahogany homolog) (DPPT-L).

[Source:Unipro/SWISSPROT;Acc:O75882]

TGTACCTAACCTTCACCTCATTGCTGACCTGCTTCTGTTGCACTTTTACTGTTTTCTTACACCTGCAGAGTCTGCTTCA  
CACTTTGTCATATCAGTCTT

In100 candidate2082 (in intron):

LOCUS ENSG00000088812

DESCRIPTION Attractin precursor (Mahogany homolog) (DPPT-L).

[Source:Unipro/SWISSPROT;Acc:O75882]

CTTTCTCTCTCCCTCTCCTGTTCTCCTTCTTAACTCTAATATCTTCTTTTCATTTTTTCAGATTCCTACCACCTTTCCTTC  
TGTTTTTCATTCTCAGTTAAT

In100 candidate2083 (in intron):

LOCUS ENSG00000175198

DESCRIPTION Propionyl-CoA carboxylase alpha chain, mitochondrial precursor EC  
6.4.1.3) (PCCase subunit alpha) (Propanoyl-CoA:carbon dioxide ligase subnit  
alpha). [Source:Uniprot/SWISSPROT;Acc:P05165]

TTGGCTAACAAAGTTCCCATCCATCTTTGCTTTAGTTCAATTGCCATTAGTTTCCCAGAGTACTTTCTAATTCCTCTACC  
ACAGTACTCATGCTTTATTT

In100 candidate2084 (in intron):

LOCUS ENSG00000175198

DESCRIPTION Propionyl-CoA carboxylase alpha chain, mitochondrial precursor EC  
6.4.1.3) (PCCase subunit alpha) (Propanoyl-CoA:carbon dioxide ligase subnit  
alpha). [Source:Uniprot/SWISSPROT;Acc:P05165]

CTTATAATAGTATTTGTAACAACTGTTTTAAGAGTCTTCATTTCTGGGTTTCTTTCTGTCAGCTATTTTCCTTCTGATAT  
GAATCACATTTTGCATCTTT

In100 candidate2085 (in intron):

LOCUS ENSG00000175198

DESCRIPTION Propionyl-CoA carboxylase alpha chain, mitochondrial precursor EC

6.4.1.3) (PCCase subunit alpha) (Propanoyl-CoA:carbon dioxide ligase subunit alpha). [Source:Uniprot/SWISSPROT;Acc:P05165]

AGATGAGGTGAGGGGTAACAAGTACCATCAACTTGATCATTTCTGATTTTCCAGGAATGCCAACTTTTGACTAAATATT  
TTTTTCCTTCCACTTCCCAT

In100 candidate2086 (in intron):

LOCUS ENSG00000175198

DESCRIPTION Propionyl-CoA carboxylase alpha chain, mitochondrial precursor EC

6.4.1.3) (PCCase subunit alpha) (Propanoyl-CoA:carbon dioxide ligase subunit alpha). [Source:Uniprot/SWISSPROT;Acc:P05165]

AAAGTAGGGATGAGGGACTGAACTGTTGGATATTATTTAACATTATCTGTGTGGATTATTCTTTTCCCTCCTCTTCAGAT  
TTCTAAGTATTGTTTCTCCA

In100 candidate2087 (in intron):

LOCUS ENSG00000175198

DESCRIPTION Propionyl-CoA carboxylase alpha chain, mitochondrial precursor EC

6.4.1.3) (PCCase subunit alpha) (Propanoyl-CoA:carbon dioxide ligase subunit alpha). [Source:Uniprot/SWISSPROT;Acc:P05165]

ACATATTGACATATTAATTCTTTGAAACGAAATTTAGAACTCATATCTAACAACCCCTCCCCTTGTATTTCTTACAGCT  
TTCTTTTCAAACCTTTTTTTT

In100 candidate2088 (in intron):

LOCUS ENSG00000096968

DESCRIPTION Tyrosine-protein kinase JAK2 (EC 2.7.10.2) (Janus kinase 2) (JA-2). [Source:Uniprot/SWISSPROT;Acc:O60674]

CATTCTCTCTAACCACCTATTTTAGCTGTATTCCCCCAAATTTTATTGTTTATTATCATTCAGGTGAAAATAATTTCTGAT  
TTCCCTTTTAATTTCTTCTT

In100 candidate2089 (in intron):

LOCUS ENSG00000198561

DESCRIPTION Catenin delta-1 (p120 catenin) (p120(ctn)) (CadherinassociatedSrc substrate) (CAS) (p120(cas)).

[Source:Uniprot/SWISSPROT;Acc:O60716]

AGGTATAGTAACTTTTGAGACCAAGACTTTTACTTTTTTTTTTCTTGGTCCCAGGATAATGCTTCTGTTTTCTTTCGTTTC  
TTCCATTTACCATCATGCT

In100 candidate2090 (in intron):

LOCUS ENSG00000154556

DESCRIPTION sorbin and SH3 domain containing 2 isoform 2

[Source:RefSeq\_peptide;Acc:NP\_066547]

ACTGGTAATATTTTAGTACTATTATGAAGAAGTTTTCATGTAACTGCCTATCAAATTCTTCTTGACCTTCTCAGCTACA  
GTAATTTTCGCCTTCATTTTC

In100 candidate2091 (in intron):

LOCUS ENSG00000196761

DESCRIPTION

CCTATTCTAGGATCTTGGCTAGGCTAACACATTGCATTGAGTCATTATGTTTCCCTTGGCTCCTCTTTGCTTTGACAGCT  
TTTCAGGCTTTTCCTTGTTTG

In100 candidate2092 (in intron):

LOCUS ENSG00000144810

DESCRIPTION Collagen alpha-1(VIII) chain precursor (Endothelial collagen).

Source:Uniprot/SWISSPROT;Acc:P27658]

ATCCTTCAATCCAATCGAGTTGACACTCAATATTA ACTATCACAATTCTACCTTACTTGATTTCCATTTTCCTGTCAGAA  
ATGTCCTGACTTTTTTACCT

In100 candidate2093 (in intron):

LOCUS ENSG00000197863

DESCRIPTION Zinc finger protein 790. [Source:Uniprot/SWISSPROT;Acc:Q6PG37]

EXON

TCTCATTTTTTCACTCATGTAACAAAAAGGTAAGTGCCATTCTTTTCTCCAGTGGCCCTTATTTTATCTATGATTTGGATC  
AAGTTCCTTCTCATCTCCCT

In100 candidate2094 (in intron):

LOCUS ENSG00000167637

DESCRIPTION Zinc finger protein 345 (Zinc finger protein HZF10).

[Source:Unprot/SWISSPROT;Acc:Q14585]

CTAATATTTTTTATGTTAGTAACATCTGGTACAATCAAGCCTGCTTTTTCGTTATCTTTTACTCTTCTCACTTATCAGAT  
TTCTTTTTTTTCTTTTCTTT



In100 candidate2095 (in intron):

LOCUS ENSG00000184220

DESCRIPTION Uncharacterized protein C3orf26.

[Source:Uniprot/SWISSPROT;Acc:9BQ75]

AATATACTAACCTTAAATACTTGTCTTCCTCATTTGTTCTCTTTTTATCCATCTGTGAACTTTTTTCCTTTTACTCAGCT  
TTTCTTTTTTTTGTACCCTTT

In100 candidate2096 (in intron):

LOCUS ENSG00000184220

DESCRIPTION Uncharacterized protein C3orf26.

[Source:Uniprot/SWISSPROT;Acc:9BQ75]

TGTTTGATATTAACATAGCTATATAATCTTTCTTTTAATTAGTAGTTACTAATGTCTTTTCTGACCTTTTACTTTCAGCT  
TTACCATACCCTTATGTTCT

In100 candidate2097 (in intron):

LOCUS ENSG00000184220

DESCRIPTION Uncharacterized protein C3orf26.

[Source:Uniprot/SWISSPROT;Acc:9BQ75]

CTCTCCTTAATCTCTTATAACCTAGATTAGACACATGTTAGACTTTCTTTATCTTCACATCCCTTAACTACTCTTCAGTT  
ATTCCATCTGTTTGGCTTTC

In100 candidate2098 (in intron):

LOCUS ENSG00000184220

DESCRIPTION Uncharacterized protein C3orf26.

[Source:Uniprot/SWISSPROT;Acc:9BQ75]

GTGAATATAAACATCTCTGTTACTCTCTTCCTAACATAAAATGATCTTTGCCCATTCCTGCCTTTATTCCTTTGTCCAGCT

GTCAGATTCTATTTTTTTCT

In100 candidate2099 (in intron):

LOCUS ENSG00000036054

DESCRIPTION TBC1 domain family, member 23

[Source:RefSeq\_peptide;Acc:NP\_06079]

TTTCTTAAATTAGAAAATATAATTATTTTATATTTCTCTTAGGGAAAATAACCTTAAATTTTACTTATTTATCTCAGGA  
TTGATTTTATTATTTTCCTT

In100 candidate2100 (in intron):

LOCUS ENSG00000127325

DESCRIPTION Bestrophin-3 (Vitelliform macular dystrophy 2-like protein 3).

Source:Uniprot/SWISSPROT;Acc:Q8N1M1]

CATCTCATTCCTACTTTTATAACTATTATTGTTATTATCACTTCCTGATTCTTAAGCTTCATCAGCACCAGAACACTTAA  
TTCTCTTCAATTCCTTTTT

In100 candidate2101 (in intron):

LOCUS ENSG00000197050

DESCRIPTION Zinc finger protein 420. [Source:Uniprot/SWISSPROT;Acc:Q8TAQ5]

EXON

AGTATTTGTTAGTGTTTTTTAAGAAATCGGATGCACCATTTACATATTAACAATATTGAATCCTTTTATTG TTCAGCATG  
CTAAATCTGCTTTTCTTTTT

In100 candidate2102 (in intron):

LOCUS ENSG00000044115

DESCRIPTION Catenin alpha-1 (Cadherin-associated protein) (Alpha Ecatenin)(  
NY- REN-13 antigen). [Source:Uniprot/SWISSPROT;Acc:P35221]

GTTTGGCTCTTATGTATGGCTTTGAAACTCATCTAGTATAACCTTATATTCCATCTCATGTTCTGTCCTATCAGGATTCC  
TGCTGCATTTTTTCCACATAT

In100 candidate2103 (in intron):

LOCUS ENSG00000044115

DESCRIPTION Catenin alpha-1 (Cadherin-associated protein) (Alpha Ecatenin)(  
NY- REN-13 antigen). [Source:Uniprot/SWISSPROT;Acc:P35221]

GTGACTAATGGTGACTTAGTATATATGGCGACTTAGTATATAACTGAAGTGACTTTTTTTTTTTTAACTTTCGTTTCAGTT  
TTTTTTTGTGTTGTTTTGTT

In100 candidate2104 (in intron):

LOCUS ENSG00000205111

DESCRIPTION Cyclin-dependent kinase-like 4 (EC 2.7.11.22).  
[Source:Uniprot/WISSPROT;Acc:Q5MAI5]

CTCTGGTCTTGGACTTTTTTTCATTGGTAACTTTTAAATTATCATTTCAATCTCGCTGCTTCTTATTGGTCTGTTTCAGAG  
GTTCTATTTCTTCCTGGTTT

In100 candidate2105 (in intron):

LOCUS ENSG00000011566

DESCRIPTION Mitogen-activated protein kinase kinase kinase kinase 3 (EC  
2.7.11.1) (MAPK/ERK kinase kinase kinase 3) (MEK kinase kinase 3) (MEKKK 3)  
(Geminal center kinase-related protein kinase) (GLK).

[Source:Uniprot/SWISSPRO;Acc:Q8IVH8]

AACTTAATAAAAATAACTTTTAAAAGTTTCTTTTTATGTTGCCTTAAACAATTTTATTTTCTCTCAGTTTCCTAAATGTT  
TCTCATTTTTTTTAAATAGCT

In100 candidate2106 (in intron):

LOCUS ENSG00000107020

DESCRIPTION Uncharacterized protein C9orf46.

[Source:Uniprot/SWISSPROT;Acc:9HBL7]

AGGAGATTAATATTGGTATAATACTATTAACCACTGATTTTTTTTTTTTTTTTGATATTTACCAGTTTTTTCCTAAAGT  
CCCTTTTCTGTTCCAGGATC

In100 candidate2107 (in intron):

LOCUS ENSG00000181220

DESCRIPTION Zinc finger protein 746. [Source:Uniprot/SWISSPROT;Acc:Q6NUN9]

EXON

GGGGATGCCACCATGCCTGGCTAACTTTTTTTAAAACTTTTTTTTTTCCCCTCTGTGGAGACAGGGTCTTCTATGTTGC  
CTAGGCTGGCTTTTTTTTGT

In100 candidate2108 (in intron):

LOCUS ENSG00000154175

DESCRIPTION Target of Nesh-SH3 precursor (Tarsh) (Nesh-binding protein) (NehBP) (ABI gene family member 3-binding protein).

[Source:Uniprot/SWISSPROT;cc:Q7Z7G0]

CAACAATAGGTAATAAAGCTTTTTTTAATGAGTGAAAACAAAGTATCTTTAACACTCTCCATGTTCAACTTTGTTTCAGCT  
TTGGGTTTTGTTTTTTTTTTT

In100 candidate2109 (in intron):

LOCUS ENSG00000111596

DESCRIPTION CCR4-NOT transcription complex subunit 2 (CCR4-associated factor 2). [Source:Uniprot/SWISSPROT;Acc:Q9NZN8]

AGATCCTATTTTTTTTTTTAATTTAACATTGTATTTTGCTTATTCTTTCCTTTATATACTCATTAACTTTTTAGCAGGC  
CATGTTCTCCTGTGTCGTTT

In100 candidate2110 (in intron):

LOCUS ENSG00000135643

DESCRIPTION Calcium-activated potassium channel subunit beta 4 (Calcium-activated potassium channel, subfamily M subunit beta 4) (Maxi K channel subunit beta 4) (BK channel subunit beta 4) (Slo-beta 4) (K(VCA)beta 4) (Charybdotxin receptor subunit beta 4) (BKbeta4) [Source:Uniprot/SWISSPROT;Acc:Q86W47]

TCTTATTTTCATTTAAAAGATTTTGAAGATTTTGAGACAAAGGCGGTGCTAACTTTGCTCCGTGATTAATCCTTCCAGAG  
TTTGTTGCCATCTTGATTTT

In100 candidate2111 (in intron):

LOCUS ENSG00000120727

DESCRIPTION Polyadenylate-binding protein-interacting protein 2 (Poly(A)-binding protein-interacting protein 2) (PABP-interacting protein 2) (PAIP-2).

Source:Uniprot/SWISSPROT;Acc:Q9BPZ3]

TTAACTTAAATTTGCTGATTCTTTTGTCTCTCTGCTCATATCTGCTGTTGAACCCCTCTAGTAAATTTTTCATTTTCAGTT  
GTACCTTTTTTTTTTTTTTTTTT

In100 candidate2112 (in intron):

LOCUS ENSG00000127329

DESCRIPTION Receptor-type tyrosine-protein phosphatase beta precursor (EC  
31.3.48) (Protein-tyrosine phosphatase beta) (R-PTP-beta).

[Source:Uniprot/SISSPROT;Acc:P23467]

AGAGGAGGACATAATTCTTAACTTTGCTTCTCTATATGTAAGTTGTTTTTCCCCCTCTGGCTTCTTTCAGGAATTTTCT  
TTATCTTTGATTTTCTGTAG

In100 candidate2113 (in intron):

LOCUS ENSG00000081148

DESCRIPTION interphotoreceptor matrix proteoglycan 2

[Source:RefSeq\_peptideAcc:NP\_057331]

AGGCTTTTTGGGGGAGCATCCTTTTAGTTTTTGATCTTAGTTTGCTAACCCAAGATCACAAAGTTTTTCTTTCTCAGTC  
TTTTCCTGTAGAATTTTAC

In100 candidate2114 (in intron):

LOCUS ENSG00000081148

DESCRIPTION interphotoreceptor matrix proteoglycan 2

[Source:RefSeq\_peptideAcc:NP\_057331]

AACCAAAGCTACATTGCCAAAAATGTTTGCTAACATTGCATCATATACTTTTTATCACTTTTCTTTTCCCTTCCAGATT  
TTTATTTTCTGGCTAAATTT

In100 candidate2115 (in intron):

LOCUS ENSG00000107036

DESCRIPTION KIAA1432 (KIAA1432), mRNA [Source:RefSeq\_dna;Acc:NM\_020829]

TTTTACCTATAAATTTCTCTCTGAGGACTTCATTCACCTGTATCCCATAACGTTGCATGTTTGTTTTTCATTAGTTTCAGAG  
CATTTCCCTGATTTCCCTTTT

In100 candidate2116 (in intron):

LOCUS ENSG00000141753

DESCRIPTION Insulin-like growth factor-binding protein 4 precursor (IGFBP-4  
(IBP- 4) (IGF-binding protein 4). [Source:Uniprot/SWISSPROT;Acc:P22692]

GAGAGAGAGAGAGAGACTCTGAGAAGGCCCTTGCCCTAACCTCATTCTTACACTTTCTTTTTTTGTTTCTCAGTTTCTCC  
TTAGACTCTCAGTCTCTTTT

In100 candidate2117 (in intron):

LOCUS ENSG00000138050

DESCRIPTION THUMP domain-containing protein 2.

[Source:Uniprot/SWISSPROT;Ac:Q9BTF0]

TGTTTCGTGTCCTAACTCTTTCCTGTAACTTTCTTCTGCTGTCAGGCTACTGCTTTTAATACATGCAGTCTTTAGGATTC  
TGTCATTTGCCTTTTCCTTT

In100 candidate2118 (in intron):

LOCUS ENSG00000138468

DESCRIPTION Sentrin-specific protease 7 (EC 3.4.22.-) (Sentrin/SUMO-specific protease SENP7) (SUMO-1-specific protease 2).

[Source:Uniprot/SWISSPROT;Ac:Q9BQF6]

TTTCATTCTTTTTTAAATAAAGCATAACATTAAATTTACATAAGCATCTGTTTCCTTTCTGTTCTTCAGATTGAATATTT  
CTATTGGTCTATCTATTTCC

In100 candidate2119 (in intron):

LOCUS ENSG00000138468

DESCRIPTION Sentrin-specific protease 7 (EC 3.4.22.-) (Sentrin/SUMO-specific protease SENP7) (SUMO-1-specific protease 2).

[Source:Uniprot/SWISSPROT;Ac:Q9BQF6]

AGTAACTGACTAAAAACCCTTTCCTGCTTCTCATGTCTATTTTCAGGTCTTGTCTTATTTTCCACTTTCACAACCATATT  
TCTCAACTACTTTCATTTGC

In100 candidate2120 (in intron):

LOCUS ENSG00000102452

DESCRIPTION voltage gated channel like 1 [Source:RefSeq\_peptide;Acc:NP\_44309]

CTATTTATGTCACTGTTTAAACCAAACCTAATATTTAGTCTTTAACAAGAGATTTAACATTTTCATCAATTTCTTTCAGGT  
CTCCATTCTTTTGCTGACAT

In100 candidate2121 (in intron):



LOCUS ENSG00000153233

DESCRIPTION Receptor-type tyrosine-protein phosphatase R precursor (EC 3.1..48) (Protein-tyrosine phosphatase PCPTP1) (NC-PTPCOM1) (Ch-1PTPase).

[Source:Uniprot/SWISSPROT;Acc:Q15256]

CTTTTCAAATAACTAGCTTTTGTTCACCTCGTTTTCTCTCTGTATTTTCAATGTAATGATTTCTACTTTTAACAGTT  
TAATTTCTTTACATTTATTT

In100 candidate2122 (in intron):

LOCUS ENSG00000153233

DESCRIPTION Receptor-type tyrosine-protein phosphatase R precursor (EC 3.1..48) (Protein-tyrosine phosphatase PCPTP1) (NC-PTPCOM1) (Ch-1PTPase).

[Source:Uniprot/SWISSPROT;Acc:Q15256]

GTTACATATACTTGTATTTAACTATCCATTTATTTTCCATTCTTGGTCTATATTTTATTTTCATTTTGTATTTTTCAGTA  
TTGAAATTGCTTTTCTTCTC

In100 candidate2123 (in intron):

LOCUS ENSG00000186660

DESCRIPTION Zinc finger protein 91 homolog (Zfp-91).

[Source:Uniprot/SWISSPROT;Acc:Q96JP5]

ATCCCATTCATCTTGGCCTCTTGTCAACTTGCAACCTCAATATAACATTGACTGTTTTTACTTCCTTTACAGATGTGTCT  
GTTTTATAGTATACTTTTTT

In100 candidate2124 (in intron):

LOCUS ENSG00000171130

DESCRIPTION ATPase, H<sup>+</sup> transporting V0 subunit e2 (ATP6V0E2), mRNA

[Source:efSeq\_dna;Acc:NM\_145230]

ACTATTAACACATGGTTTAACTTAAACCCACTTTTTTTTTTTTTTTTCAAAATTCTTCCTGGACAGAGCATTCTCTGAGGT  
CCTTTCTCTAATGCTATTTTC

In100 candidate2125 (in intron):

LOCUS ENSG00000183023

DESCRIPTION Sodium/calcium exchanger 1 precursor (Na(+)/Ca(2+)-exchange  
proein 1). [Source:Uniprot/SWISSPROT;Acc:P32418]

AGTCTCCTTGGCAACATAACGTAGAGGTTGATTTTTCTCTTTTTTATATCTATCTCTGACTAGCAGGTTTGGTTTTTCCC  
TTTGTCTGAAGCTTATCTAC

In100 candidate2126 (in intron):

LOCUS ENSG00000158458

DESCRIPTION Pro-neuregulin-2, membrane-bound isoform precursor (Pro-NRG2)  
[ontains: Neuregulin-2 (NRG-2) (Neural- and thymus-derived activator for ERB  
kinases) (NTAK) (Divergent of neuregulin-1) (DON-1)].  
[Source:Uniprot/SWISPROT;Acc:O14511]

CCTATCTAAAATTGCAACCCCATAACCCTCCCAACCCTACTCTGTTTTATTTTTCACCTCAGCTCTTATCATTATCTGAC  
ATCATATTTTACCAACTTTT

In100 candidate2127 (in intron):

LOCUS ENSG00000158458

DESCRIPTION Pro-neuregulin-2, membrane-bound isoform precursor (Pro-NRG2)  
[ontains: Neuregulin-2 (NRG-2) (Neural- and thymus-derived activator for ERB  
kinases) (NTAK) (Divergent of neuregulin-1) (DON-1)].  
[Source:Uniprot/SWISPROT;Acc:O14511]

AAATTTTAAATAAATACTAGTTTATTTGAGCCTTTTTCATTTATGGTTTAACCATCCAATATGTCTGTTTACTTCAGTT  
CTTTTCTTCTTGACACTTC

In100 candidate2128 (in intron):

LOCUS ENSG00000080371

DESCRIPTION Ras-related protein Rab-21. [Source:Uniprot/SWISSPROT;Acc:Q9UL2]

ATTCTTAGCTCCTATGCTAGCATGAATGGGAGAAGACATTTATTGTCATAACATGTATTTGGTCTTCTCATTTTTTCAGGT  
TACTTTGCTGTTTTGGCATT

In100 candidate2129 (in intron):

LOCUS ENSG00000080371

DESCRIPTION Ras-related protein Rab-21. [Source:Uniprot/SWISSPROT;Acc:Q9UL2]

AGTAACTCTTGATACTCTTCTTTCTTTCCTATCTTCATGGTCTTAGTTCAGATCTCCTTTTTTATATTTTTCTCCAATTT  
TGTAAGTGTTCTTTCTACCT

In100 candidate2130 (in intron):

LOCUS ENSG00000102466

DESCRIPTION Fibroblast growth factor 14 (FGF-14) (Fibroblast growth factor  
omologous factor 4) (FHF-4). [Source:Uniprot/SWISSPROT;Acc:Q92915]

GGTATATGAGTTCCTTGTGTATCTTAGATATTAACCCCTTATCAAATGCATTTACATATATCTTCTCCCATTTACAGAC  
TGTCTCTTCACTCTGTTGAT

In100 candidate2131 (in intron):

LOCUS ENSG00000102466

DESCRIPTION Fibroblast growth factor 14 (FGF-14) (Fibroblast growth factor homologous factor 4) (FHF-4). [Source:Uniprot/SWISSPROT;Acc:Q92915]

CTGTTAAATATTGTGAAGATACATTTTAAAGGTCACATAACTGCTTTTGCATAATTTTATTTACATGTTTTTCAGTTAC  
ATTCTCTTTCTTCCTACAGT

In100 candidate2132 (in exon):

LOCUS ENSG00000139287

DESCRIPTION Tryptophan 5-hydroxylase 2 (EC 1.14.16.4) (Tryptophan 5-monooxygenase 2) (Neuronal tryptophan hydroxylase).

[Source:Uniprot/SWISSPROT;Acc:QIWU9]

ACCAAAGTGCATCTAGTTAAAATTTGTAACAAATAGCCCTCTTATGAGTCTCATTTATGCCCTTTTCTTTTTCAGATCTA  
AGCCTTTCCTCTGTGTTCAT

In100 candidate2133 (in intron):

LOCUS ENSG00000137033

DESCRIPTION Interleukin-33 precursor (IL-33) (Interleukin-1 family member 1) (IL-1F11) (Nuclear factor from high endothelial venules) (NF-HEV).

[Source:Uniprot/SWISSPROT;Acc:O95760]

TTCTTTTTTCTGCTTCTCTGTCTGGTCTTCTTATTAAC TTCGTTTCTCCTCTTCCCCCTTACATGTTAGATATTCCAGAG  
TTTCATCTTCTTACAGCTTT

In100 candidate2134 (in intron):

LOCUS ENSG00000170017

DESCRIPTION CD166 antigen precursor (Activated leukocyte-cell adhesion molecule) (ALCAM). [Source:Uniprot/SWISSPROT;Acc:Q13740]

TCTTTTAAATTATACAAAATCACTTCACATGTAATGTAAGAAGGTAACAAGCATACACTTCTATTTCCCTTTCAGGTATT  
TTGTGCCATTGTTGTTATTT

In100 candidate2135 (in intron):

LOCUS ENSG00000113068

DESCRIPTION Prefoldin subunit 1. [Source:Uniprot/SWISSPROT;Acc:O60925]

AGGTTCTCTAACCTGATACCCCATTTTCATTAGTATTTGCTAGGTTCCCTTTTACCCAGCTTTGTTCTTTCTGTTTCTTT  
ATACTTGCCCTCTCCTGATT

In100 candidate2136 (in intron):

LOCUS ENSG00000177324

DESCRIPTION Uncharacterized protein CXorf20.

[Source:Uniprot/SWISSPROT;Acc:8NDZ0]

AGTAGCTTTTCTTAAACCTAGGTTCTTATATAATAACTTCTTTGCCTACCTCCTTTATTAATCAGCTCTTTTATTCTCAT  
ATTCTCTTTTCTTGGCTTT

In100 candidate2137 (in intron):

LOCUS ENSG00000166006

DESCRIPTION Shaw-related voltage-gated potassium channel protein 2 isoform V3.2c [Source:RefSeq\_peptide;Acc:NP\_715624]

CCATCATTTAAGTATGATATTGAAGTCACTAACTGCAATTGTTGAATTATCTATTTCTTCCTTTAATTCTGTCAGTTTTT  
GCTTCTGTATTCTGGGGTTC

In100 candidate2138 (in intron):

LOCUS ENSG00000166006

DESCRIPTION Shaw-related voltage-gated potassium channel protein 2 isoform

V3.2c [Source:RefSeq\_peptide;Acc:NP\_715624]

ACTTTGCCACAACTATAAAGGCAACTCTAAACACGTGACCTAACTTCTTAGGCTTTTTTTGTTTATTGTTTTTCAGTT  
ATTTTTGTTTTTTTGTGTTTG

In100 candidate2139 (in intron):

LOCUS ENSG00000147854

DESCRIPTION E3 ubiquitin-protein ligase UHRF2 (EC 6.3.2.-) (Ubiquitin-like HD  
and RING finger domain-containing protein 2) (Ubiquitin-like-containing HD and  
RING finger domains protein 2) (Np95/ICBP90-like RING finger protein (Np95-like  
RING finger protein) (Nucle [Source:Uniprot/SWISSPROT;Acc:Q96PU]

TTATTTAATACATGAATTAATTTATGTAATGTATAACATGCTCCATCTCTGATTGTTTGTCTACCCAGCATGGTTGGCT  
CTTAGGTTTTTATTTTTTCC

In100 candidate2140 (in intron):

LOCUS ENSG00000114439

DESCRIPTION HMG box transcription factor BBX (Bobby sox homolog) (HMG  
boxontaining

protein 2). [Source:Uniprot/SWISSPROT;Acc:Q8WY36]

TGTGTAGACATGTGTGCCTGTATGTTCCCTGTATGTAACCTTTTACTTACTTTGGGCCTTCTTTTCACTTCCACTTCAGCT  
TCTTAGTTTTGTTTTGTATA

In100 candidate2141 (in intron):

LOCUS ENSG00000180881

DESCRIPTION Calcyphosin-2 (Calcyphosine-2).

[Source:Uniprot/SWISSPROT;Acc:QBX5]

AAGCACTCTTCTCCATTTTTCTAACTCTTCCACCTCTTGTTCCCTGCCCCAATCTTCTATTGTTTTATGCAGAAATATTC  
AACCTATCCCTCTTTTTTTT

In100 candidate2142 (in intron):

LOCUS ENSG00000008086

DESCRIPTION Cyclin-dependent kinase-like 5 (EC 2.7.11.22) (Serine/threonine  
protein kinase 9). [Source:Uniprot/SWISSPROT;Acc:O76039]

TTATATAGGAATGTCATTTCTATTTATAACTGAATTAGAATATTTTTTCTAACAGCTTTAGCTCTCTTCCATATTTAAAC  
TTAAAATTCTTTGCTGTTTT

In100 candidate2143 (in intron):

LOCUS ENSG00000173401

DESCRIPTION GLIPR1-like protein 1 precursor.

[Source:Uniprot/SWISSPROT;Acc:6UWM5]

AAACACTTGCAAAGAGAGGCACCCTAAAACTAACACGGCACCTCAAAGTGGATCATTCTTGTCTTTCCTCTTCTTCAGAT  
TGTTGCCTACTTTTTTTTTTTT

In100 candidate2144 (in intron):

LOCUS ENSG00000173401

DESCRIPTION GLIPR1-like protein 1 precursor.

[Source:Uniprot/SWISSPROT;Acc:6UWM5]

ATTGCCTTAAAAAATTAAATGCTTTTGTATATTAGTCTATTAACACTTTTACCAAACCTCTCTTATTATTTCTGACAGTT  
TATTGATTTTCTTGGATTTT

In100 candidate2145 (in intron):

LOCUS ENSG00000180481

DESCRIPTION GLI pathogenesis-related 1 like 2

[Source:RefSeq\_peptide;Acc:NP689649]

TTTTATGATATATTTAACTGGCCAATTGATTTTTTAAAATTTCTAGACTTTTTTTTTTAATTTGCTCATATTCCCCCAGTG  
TCCTGTTTTCTCTTATGATT

In100 candidate2146 (in intron):

LOCUS ENSG00000110077

DESCRIPTION Membrane-spanning 4-domains subfamily A member 6A (Four-span  
trnsmembrane protein 3) (CD20 antigen-like 3).

[Source:Uniprot/SWISSPROT;Acc:9H2W1]

TCATTTTTTCCATTATCCTATCTGTCAACCAAACCTATATTTATAACCACACATGTGGCCTTTTATTTTATTACAGGGTAA  
TATTTTATTTTCAATTCTACTT

In100 candidate2147 (in intron):

LOCUS ENSG00000086717



DESCRIPTION Serine/threonine-protein phosphatase with EF-hands 1 (EC 3.1.3.6)  
(PPEF-1) (Protein phosphatase with EF calcium-binding domain) (PPEF)  
(Serine/threonine-protein phosphatase 7) (PP7).

[Source:Uniprot/SWISSPROT;Acc:O4829]

TGATTACTGTAGCTTTGTGGGAAGTTTAAACATTGGGAAGTGTGAGTTCTCCAACCTTCTTCTTCTTTTCCAGATCGTT  
TTGGCTATTCTGGGCCCCCTT

In100 candidate2148 (in intron):

LOCUS ENSG00000187109

DESCRIPTION Nucleosome assembly protein 1-like 1 (NAP-1-related protein)  
(hRP). [Source:Uniprot/SWISSPROT;Acc:P55209]

TTTTTTTTTTTTTAACTTTTAACTAGTATGTCTTTTTTTTCCATCTTTTCATCTGTGTGTCTTCCTCTAGTATCAGTG  
TTTGCTGCTTTTATTTTTTG

In100 candidate2149 (in intron):

LOCUS ENSG00000173848

DESCRIPTION Neuroepithelial cell-transforming gene 1 protein (p65 Net1  
protoncogene)  
(Rho guanine nucleotide exchange factor 8).

[Source:Uniprot/SWISPROT;Acc:Q7Z628]

CCAAATTCTTAGTACTAACTTGGAGATTCAAATCACATATAACTTCATTACTAATTTCTTTCGTACTTATCCAGTTCAA  
ATGTAACTCTTTTTGTTTTT

In100 candidate2150 (in intron):

LOCUS ENSG00000173848

DESCRIPTION Neuroepithelial cell-transforming gene 1 protein (p65 Net1  
protoncogene)

(Rho guanine nucleotide exchange factor 8).

[Source:Uniprot/SWISPROT;Acc:Q7Z628]

CCTCTTTGCTGTAATTAACATTTTTTTCTTCCCTTGGCTTTTGCTTTGTTTCTTTCCTTCTAACTATTCCTTTTGCAGAA  
TTTTCCTTCCCTTGGCTTTC

In100 candidate2151 (in intron):

LOCUS ENSG00000144821

DESCRIPTION Myosin-15 (Myosin heavy chain 15).

[Source:Uniprot/SWISSPROT;Ac:Q9Y2K3]

TCCAAGATTAGAAATAAGGTCTAAAGAAACCCTGAAGAACATAACCATTAATCTAAATTTTCACTTAGTTGTTCCCAGAC  
TTTTTCTGAATGAGTTTTCT

In100 candidate2152 (in intron):

LOCUS ENSG00000152527

DESCRIPTION pleckstrin homology domain containing, family H (with MyTH4  
domin) member 2 [Source:RefSeq\_peptide;Acc:NP\_742066]

AAGGTAAAGTTAACACAATATCATTTTTCTGTCTTCTGAACAGTGATCTTCACATTATTCAACTACCCATTGAATATTTCT  
TCATCTTCCTTTGTATTATT

In100 candidate2153 (in intron):

LOCUS ENSG00000110079

DESCRIPTION Membrane-spanning 4-domains subfamily A member 4A (Four-span  
trnsmembrane protein 1) (CD20 antigen-like 1).

[Source:Uniprot/SWISSPROT;Acc:96JQ5]

AGACCTTTTAATTCTACACTTCTAATCTTTTAACCTCCCTTCTATTATGACCATTTTCTTGTTTCTCTACAGAATTCTTG  
GTGATTTCTTCAAATTTTTC

In100 candidate2154 (in intron):

LOCUS ENSG00000091039

DESCRIPTION Oxysterol-binding protein-related protein 8 (OSBP-related proten  
8) (ORP-8). [Source:Uniprot/SWISSPROT;Acc:Q9BZF1]

TCTCCTTTTCCCTTATATTTTATAGGTAACCTTACTGTGCTTTTCCCTTCTCTCTGATAGTTGATATTATTAGTTCAGTT  
TGTTTCTTCTGCTCCCCTGT

In100 candidate2155 (in intron):

LOCUS ENSG00000091039

DESCRIPTION Oxysterol-binding protein-related protein 8 (OSBP-related proten  
8) (ORP-8). [Source:Uniprot/SWISSPROT;Acc:Q9BZF1]

AGTTCATGACTAGGTAACCTGATCTAGCACTTTCTTTCCTCATTTTTAAATTTAATTCTCACACTCCAGTATTTCTTCTT  
AGCTATTCTTTATCTAAACA

In100 candidate2156 (in intron):

LOCUS ENSG00000091039

DESCRIPTION Oxysterol-binding protein-related protein 8 (OSBP-related proten  
8) (ORP-8). [Source:Uniprot/SWISSPROT;Acc:Q9BZF1]

TGTGATTATCCATTAAGCTCTTATTTTAACATTTGTATCGTTTACCTTTTTACAGAATATTTATTTTCCTAATTGAATTG  
TTAGCTTCTTTAATTCCCTC

In100 candidate2157 (in intron):

LOCUS ENSG00000107077

DESCRIPTION Jmjc domain-containing histone demethylation protein 3C (EC 1.1.11.-) (Jumonji domain-containing protein 2C) (Gene amplified in squamous cell carcinoma 1 protein) (GASC-1 protein). [Source:Uniprot/SWISSPROT;Acc:Q9HR0]

GTATAACAAATGTAACCTCTGATCTTTCCTCTCAGCTCTGCTTCTCTGGAATTTCTCCTGCATCTCATCTCATTTTCATTGCTCACTCATTTTCATTATGAGT

In100 candidate2158 (in intron):

LOCUS ENSG00000107077

DESCRIPTION Jmjc domain-containing histone demethylation protein 3C (EC 1.1.11.-) (Jumonji domain-containing protein 2C) (Gene amplified in squamous cell carcinoma 1 protein) (GASC-1 protein). [Source:Uniprot/SWISSPROT;Acc:Q9HR0]

TCAAGGTCTAGGTTTAATTCTAGTAGCCACTAATTTGCTGCATGTCTTAACAATTTCTGTGCCTCAATTTCTTGTCAGAGCCATTTTTCATTTGTTTGTT

In100 candidate2159 (in intron):

LOCUS ENSG00000107077

DESCRIPTION Jmjc domain-containing histone demethylation protein 3C (EC 1.1.11.-) (Jumonji domain-containing protein 2C) (Gene amplified in squamous cell carcinoma 1 protein) (GASC-1 protein). [Source:Uniprot/SWISSPROT;Acc:Q9HR0]

AAGATCTTAACCCCTTCTGAGAACTACTTATATCCTTACTCTTTTCCCCTAATTTTCCTTATCTAGATCTTTACAGATTGC  
TTTGTCAAAATTTTCATTTTT

In100 candidate2160 (in intron):

LOCUS ENSG00000107077

DESCRIPTION JmjC domain-containing histone demethylation protein 3C (EC  
1.1.11.-) (Jumonji domain-containing protein 2C) (Gene amplified in squamous cell  
carcinoma 1 protein) (GASC-1 protein). [Source:Uniprot/SWISSPROT;Acc:Q9HR0]

GATTCCAATGAGGATAACAAACACGATTGTCCTCTGTAGTTCTGTGTTCTGTTGTAGCCTCCTTTCTCTCGTAGTCAGGG  
TTCTTGGCTTCTCAGTGTTT

In100 candidate2161 (in intron):

LOCUS ENSG00000198919

DESCRIPTION E3 ubiquitin-protein ligase DZIP3 (EC 6.3.2.-)  
(DAZinteractingprotein  
3) (RNA-binding ubiquitin ligase of 138 kDa) (hRUL138).

[Source:Unirot/SWISSPROT;Acc:Q86Y13]

ACATTTGCAAGTAGTTTAACTGCTTGTTACAAATATATTTTTTCCTGTTTTTTAGCCAGTATAATATTTATAGCTTCTTG  
AATCTTTAGTCTCTTTTTTTT

In100 candidate2162 (in intron):

LOCUS ENSG00000173698

DESCRIPTION G-protein coupled receptor 64 precursor (Epididymis-specific  
prtein 6) (He6 receptor). [Source:Uniprot/SWISSPROT;Acc:Q8IZP9]

ATACCAACTTTATTCTTTTTTGTGTTGTTTGTGTTTAACTCCTCACTCCCACTTGGAGCTCTCTTTTCTTCAGAT  
ACTTTCTTTTCCTTGGGGAT

In100 candidate2163 (in intron):

LOCUS ENSG00000067798

DESCRIPTION neuron navigator 3 [Source:RefSeq\_peptide;Acc:NP\_055718]

ACACTTATGACTGATGGAATTGATTATCTTTTCTGTATTTAACTGGCCATTTGGATATCTTCCGTTGTGTTTCATTCAGGT  
TTTCTGCTTACTTTTCTAAT

In100 candidate2164 (in intron):

LOCUS ENSG00000067798

DESCRIPTION neuron navigator 3 [Source:RefSeq\_peptide;Acc:NP\_055718]

AATCCTACATTTCCCTGCTCCACTCTTTCATTCTCTTAACAAATAATTCACAACCTATTCTTTCTCCTCAAATTTCCAGTC  
TTTCTTTCCCTTTCTCAGTT

In100 candidate2165 (in intron):

LOCUS ENSG00000133612

DESCRIPTION Centaurin-gamma 3 (ARF-GAP with GTP-binding protein-like, ankyrn  
repeat and pleckstrin homology domains 3) (AGAP-3) (MR1-interacting proten)  
(MRIP-1) (CRAM-associated GTPase) (CRAG). [Source:Uniprot/SWISSPROT;Acc:96P47]

CCTCACCGGTGCTGACCGACTTGTGCGGGGCTTGAGTATAACTTGCCAAAATCTTTATTCTTTTCGATATTTGCAGATATG  
TGCCACTGTTTCCAACCTTTT

In100 candidate2166 (in intron):

LOCUS ENSG00000153707

DESCRIPTION Receptor-type tyrosine-protein phosphatase delta precursor (EC .1.3.48) (Protein-tyrosine phosphatase delta) (R-PTP-delta).

[Source:Unipro/SWISSPROT;Acc:P23468]

TCCACTTCTCATAGAAACAATAATTTCTACATAGATAACCTTCAAATAAATTCCTCGCTTGTCTCTGGAGTTCAGAC  
GTGCATTTCTATCTGCTTGT

In100 candidate2167 (in intron):

LOCUS ENSG00000153707

DESCRIPTION Receptor-type tyrosine-protein phosphatase delta precursor (EC .1.3.48) (Protein-tyrosine phosphatase delta) (R-PTP-delta).

[Source:Unipro/SWISSPROT;Acc:P23468]

AGGTCCTGTGATTGGATGGAGATACCATTTTAGAACCAATTCTTTAACCTAAAATTTAGTATATTCTTTTTTCTTCAGTT  
TGCTTTAGCTTCACTTATTT

In100 candidate2168 (in intron):

LOCUS ENSG00000153707

DESCRIPTION Receptor-type tyrosine-protein phosphatase delta precursor (EC .1.3.48) (Protein-tyrosine phosphatase delta) (R-PTP-delta).

[Source:Unipro/SWISSPROT;Acc:P23468]

TTGTCCATTATGGCTTTTTATAACTAAATGAAACGATTAATTCCTTAATATTCACTTTATTCGTTTCATTTTCATTCAGGC  
ATTCTTTTTTACAGACTTAT

In100 candidate2169 (in intron):

LOCUS ENSG00000067715

DESCRIPTION Synaptotagmin-1 (Synaptotagmin I) (SytI) (p65).

[Source:UniprotSWISSPROT;Acc:P21579]

TATTCTGATAATAACATGTTTTGAAAATGGAGGTGTTTTTTTTTTTTTTTTTTTTTGCCAAACTACTCTGCTCCATCAGGC  
TCTTTTGTATCCTAAATATT

In100 candidate2170 (in intron):

LOCUS ENSG00000067715

DESCRIPTION Synaptotagmin-1 (Synaptotagmin I) (SytI) (p65).

[Source:UniprotSWISSPROT;Acc:P21579]

CACCAAAATCTTGTTTATTCACATACTTTAATCGTATTTTTGTCTAAATTTCTTCTTCCAAGTTTTTTTTTTTCAGTCA  
GTAATCCTACTCTTCATTTT

In100 candidate2171 (in intron):

LOCUS ENSG00000067715

DESCRIPTION Synaptotagmin-1 (Synaptotagmin I) (SytI) (p65).

[Source:UniprotSWISSPROT;Acc:P21579]

TCACACTGATATGTCAACTGCCCATTAACCATGCCCCACCTGAGAATTCTTTCTTTGCCATATCCTTGTTTTCCAGCTTTT  
GTATATGCATCCCTACATTT

In100 candidate2172 (in intron):

LOCUS ENSG00000177425

DESCRIPTION PRKC apoptosis Wt1 regulator protein (Prostate apoptosis response  
4 protein) (Par-4). [Source:Uniprot/SWISSPROT;Acc:Q96IZ0]



TTAGTTGCTAACTTTGCACTTGCCTCCATTCTTGATTTTTTTTTTTTTTCTCTGTTTCCAACCTTCATAATGCGATCAGGGT  
CACTTCTTTCTCCTGTGCTT

In100 candidate2173 (in intron):

LOCUS ENSG00000138095

DESCRIPTION 130 kDa leucine-rich protein (LRP 130) (GP130) (Leucine-rich PP  
motif-containing protein). [Source:Uniprot/SWISSPROT;Acc:P42704]

AGGTACCTTAACCTTCACTTAAACTGTATTTATTGTCTTCAGAATTTGCTTCTACTATGAATTCCTCTCTAATCCCATCC  
TTTTTGTATTATTTCAGTAGC

In100 candidate2174 (in intron):

LOCUS ENSG00000058272

DESCRIPTION Protein phosphatase 1 regulatory subunit 12A (Myosin  
phosphatase targeting  
subunit 1) (Myosin phosphatase target subunit 1) (Protein phosphatase  
myosin-binding subunit). [Source:Uniprot/SWISSPROT;Acc:O14974]

GTTTTGTATTTTAGTAGAGGACTGATAAAATTGGAGGGCCATTGCTAACTCTTCATTATCTGTTACCTTATTTACAGAT  
CTGCATTTTGAATTTTTTTTG

In100 candidate2175 (in intron):

LOCUS ENSG00000101236

DESCRIPTION RING finger protein 24. [Source:Uniprot/SWISSPROT;Acc:Q9Y225]

AGTTTATCTCCTTAGCTCTCCTAATGATTATTGTTATTAAGCAAGGAATAACAACAAACAATTTTGGCTACATCTCAGTT  
CCCCTCTTTTATAAATATG

In100 candidate2176 (in intron):

LOCUS ENSG00000182346

DESCRIPTION D-amino acid oxidase activator (Protein G72).

[Source:Uniprot/SISSPROT;Acc:P59103]

TGGGTGATCTTCAATTTTGTAGCCAACTAACCCACTCTTGTCTACTCATTGTGTTGCTTTTGTCTCACAGATTGATTATCTCATCAATTCATTTATTT

In100 candidate2177 (in intron):

LOCUS ENSG00000144824

DESCRIPTION Pleckstrin homology-like domain family B member 2 (Protein LL5-eta). [Source:Uniprot/SWISSPROT;Acc:Q86SQ0]

ACATTTTATATTATTGCATAGCTTGAATTAGTCTTGCATACTAACCTTATATCACATATAATTTTGTCTACTTCCAGTTTTCCTTTTCTTCTTAGTT

In100 candidate2178 (in intron):

LOCUS ENSG00000144824

DESCRIPTION Pleckstrin homology-like domain family B member 2 (Protein LL5-eta). [Source:Uniprot/SWISSPROT;Acc:Q86SQ0]

CCATTTTGTATATATTTCTTTCAAAGCAAAGTCCTTCTTTCTAACTGGCATTAATTCTTGTCTATTCTAACATCTCAGATTTTTTTGTAGCCACACCTA

In100 candidate2179 (in intron):

LOCUS ENSG00000138032

DESCRIPTION Protein phosphatase 2C isoform beta (EC 3.1.3.16) (PP2C-beta).

Source:Uniprot/SWISSPROT;Acc:O75688]

TTGTATTATGGGTACATGAGTGTTGAGCTGAGATAACCATTTCTGTTGTACCTTGCTGTACTTCATCAGAGCAAGACTCT  
ATGCCCTTACCTTTTATTTT

In100 candidate2180 (in intron):

LOCUS ENSG00000057608

DESCRIPTION Rab GDP dissociation inhibitor beta (Rab GDI beta) (Guanosine  
dphosphate dissociation inhibitor 2) (GDI-2).

[Source:Uniprot/SWISSPROT;Acc:50395]

AACAAAAACAAAACAAAACATAAAATGTATGCATCTTAAATTTTACAATAACATTATTGTAAATACATCTCATTTCAGCT  
TCTTGTCTCATTTCAGTAACT

In100 candidate2181 (in intron):

LOCUS ENSG00000057608

DESCRIPTION Rab GDP dissociation inhibitor beta (Rab GDI beta) (Guanosine  
dphosphate dissociation inhibitor 2) (GDI-2).

[Source:Uniprot/SWISSPROT;Acc:50395]

AGCTGCTTTTAAACTGCGTATTTTAACATTTGGGCATCTGTTTCTGTTGTTTGTCTTCTGTTTCTTTGGATCACAGTT  
TTCTGTTTCTTCCCATGTCT

In100 candidate2182 (in intron):

LOCUS ENSG00000131828

DESCRIPTION Pyruvate dehydrogenase E1 component alpha subunit, somatic form  
mitochondrial precursor (EC 1.2.4.1) (PDHE1-A type I).

[Source:Uniprot/SWISPROT;Acc:P08559]

AACACATCTGTTTGATTGCTAAATATAACCATTGATTTGCTGTTTCACCTTCTCTCAGCTTTACTTCTTCCCAAATTCCT  
AAATTTCCCTTCACTTTTTTCT

In100 candidate2183 (in intron):

LOCUS ENSG00000131828

DESCRIPTION Pyruvate dehydrogenase E1 component alpha subunit, somatic form  
mitochondrial precursor (EC 1.2.4.1) (PDHE1-A type I).

[Source:Uniprot/SWISPROT;Acc:P08559]

CACTTTTTCTGAGATACATTAGTGGACTGTCTCTGCCTGTAAGTTAACTGAAACACTGATTCCTAGTATTTTCAGTTGTTT  
TCCTCCAGCACTGTCATTGT

In100 candidate2184 (in intron):

LOCUS ENSG00000106617

DESCRIPTION 5'-AMP-activated protein kinase subunit gamma-2 (AMPK gamma-2  
cain) (AMPK gamma2) (H91620p). [Source:Uniprot/SWISSPROT;Acc:Q9UGJ0]

TTGATGGCTGTGTACTGGGGAAGGGAACGTGGCCCTTGACCTAACGAAGGTGTCGCCTTGCTTGGCTTCAGCCTTTCTT  
GGGCATTTTGGGTCACCTTT

In100 candidate2185 (in intron):

LOCUS ENSG00000204442

DESCRIPTION similar to transmembrane protein 28 (LOC728215), mRNA

[Source:RfSeq\_dna;Acc:NM\_001080396]

AATACTTTAACTTTGAGTTCTTACTGTATTTGACATTGCTATTTTATCATTTTATTTATATTGTTTTCTCTGTCTCAGCC  
TCCTCCTCATGTGGTTTTAT

In100 candidate2186 (in intron):

LOCUS ENSG00000204442

DESCRIPTION similar to transmembrane protein 28 (LOC728215), mRNA

[Source:RfSeq\_dna;Acc:NM\_001080396]

TTCTCTAGCTTTTCTGGTTCTTTAACTCCCTCACTTTTTTTTCCATGGCTCATTTTTCTTTTCCAGATCCATAAATCTGGA  
TTCTTTCTAACATCTTTTTT

In100 candidate2187 (in intron):

LOCUS ENSG00000204442

DESCRIPTION similar to transmembrane protein 28 (LOC728215), mRNA

[Source:RfSeq\_dna;Acc:NM\_001080396]

AGAGTGGCCATTAACTTGAGTTAAGCTTTCTTACTCTGCTAGGTCAGTTACCCCTTCTCCATTTTCTTTTATTTCTTCAT  
GTGTTGTGATTACAGGTTTT

In100 candidate2188 (in intron):

LOCUS ENSG00000204442

DESCRIPTION similar to transmembrane protein 28 (LOC728215), mRNA

[Source:RfSeq\_dna;Acc:NM\_001080396]

CAACCTGAAGCGCCACTCATATTTTTTTAAACGATTTGTGTTGCCAATTTTTTTTTTTAACTCAGCATTCACCTGGTTGC  
TGTCAACTTTTGCCCATTTT

In100 candidate2189 (in intron):

LOCUS ENSG00000204442

DESCRIPTION similar to transmembrane protein 28 (LOC728215), mRNA

[Source:RfSeq\_dna;Acc:NM\_001080396]

ACGTTATTATATTCTAAATATATGTTTTAGAACTAACTATTGACATAGTTTAACTTTCTTCATACTTTCTCCATCCAGCC  
TTTCTCATTATATATTTCTA

In100 candidate2190 (in intron):

LOCUS ENSG00000204442

DESCRIPTION similar to transmembrane protein 28 (LOC728215), mRNA

[Source:RfSeq\_dna;Acc:NM\_001080396]

AGATGCAAGTGCTTGATCAAGGCTTGCTTATTAGAAGTGCCCTAACTTTCATAGTAATTCCATGTCTTTGACACTCAGCC  
ATTTTCAACTCTATTTTGTAG

In100 candidate2191 (in intron):

LOCUS ENSG00000204442

DESCRIPTION similar to transmembrane protein 28 (LOC728215), mRNA

[Source:RfSeq\_dna;Acc:NM\_001080396]

GTGAGTTATCTGTAACTCTGCTGATTGTTTCTTTTGCTGTGCAGAAGGCTTTTAGTTTAATTATGTCCCATCTACTTAT  
CTTTGTTGCATTTGCTTTTT

In100 candidate2192 (in intron):

LOCUS ENSG00000081842

DESCRIPTION Protocadherin alpha 13 precursor (PCDH-alpha13).

[Source:Unipro/SWISSPROT;Acc:Q9Y5I0]

CCCCTTCATCTCTAAACTTCAATTATGACCATAATAACTATGGATTATTTAAATTTGCTCCTCTTTGTCTTTTAGCAGAG  
TTTTGCCTTGATATTTCCAC

In100 candidate2193 (in intron):

LOCUS ENSG00000139220

DESCRIPTION Liprin-alpha-2 (Protein tyrosine phosphatase receptor type f  
poypeptide-interacting protein alpha-2) (PTPRF-interacting protein alpha-2).

Source:Uniprot/SWISSPROT;Acc:O75334]

GACTGCTGCGGCTGCTCTCTAGGCTTGGAAGTTGTCCCCTAAATAACCATATGGCTTGCTTTCTTTACCTTTTCAGGT  
CTTTACTCAAATATTTATTT

In100 candidate2194 (in intron):

LOCUS ENSG00000139220

DESCRIPTION Liprin-alpha-2 (Protein tyrosine phosphatase receptor type f  
poypeptide-interacting protein alpha-2) (PTPRF-interacting protein alpha-2).

Source:Uniprot/SWISSPROT;Acc:O75334]

AAACATATGCATAATCTATCTACTTCAATCACTTCCATAGCTAACACTTAGGTTCAAGTCACCTTTATCTTTTCCAGAT  
TCTTTCAATAGTCCTCTCAT

In100 candidate2195 (in intron):

LOCUS ENSG00000139220

DESCRIPTION Liprin-alpha-2 (Protein tyrosine phosphatase receptor type f  
poypeptide-interacting protein alpha-2) (PTPRF-interacting protein alpha-2).

Source:Uniprot/SWISSPROT;Acc:O75334]

CGAGCTTTCTGTGGCCTATAACATCTTCACTAATTTCTCCCCTCTGCTTTAAAAACTTGATTGTTTCAGTGCACTTACAG  
GTTTATATTTTCTCTTATTT

In100 candidate2196 (in intron):

LOCUS ENSG00000178234

DESCRIPTION Polypeptide N-acetylgalactosaminyltransferase 11 (EC 2.4.1.41)

Protein-UDP acetylgalactosaminyltransferase 11) (UDP- GalNAc:polypeptide

Ncetylgalactosaminyltransferase

11) (Polypeptide GalNAc transferase 11) (GalAc-

T11) (pp-GaNTase 11). [Source:Uniprot/SWISSPROT;Acc:Q8NCW6]

AAAGCATTGTGCTCGATGCTATGGAGATACAAATAAGTCTGTAATAAGTAAGTATTCCTCTTTGCTAGTATTCCAGCT  
CTTACCCTTCATTTCTTTTT

In100 candidate2197 (in intron):

LOCUS ENSG00000172139

DESCRIPTION sperm-specific sodium proton exchanger

[Source:RefSeq\_peptide;Ac:NP\_898884]

AGCTTCCTGGTTAACAACCTTGGTGCTGCCTCTAGTCTCTGTCTGTATTCTTCTGCATTTAACCTTCAGATTGTAAGCCT  
TTTTGGCAAGCTTTTCTTCT

In100 candidate2198 (in intron):

LOCUS ENSG00000107165



DESCRIPTION 5,6-dihydroxyindole-2-carboxylic acid oxidase precursor (EC 1.1.18.-) (DHICA oxidase) (Tyrosinase-related protein 1) (TRP-1) (TRP1) (TRP Catalase B) (Glycoprotein 75) (Melanoma antigen gp75).

[Source:Uniprot/SWISPROT;Acc:P17643]

TCTTGTGGAAGAAGCATATATTGATTTAACAAATATCAACACCTGTATCTGTTAGTGTGATTCTTTTTTTTCCTTCAGAT  
ACTTTTATGTATCTCATATC

In100 candidate2199 (in intron):

LOCUS ENSG00000139826

DESCRIPTION abhydrolase domain containing 13

[Source:RefSeq\_peptide;Acc:NP\_16248]

ACATAATTAAGTAATTTAAATTTTGTCTCATAGAAGTAGCTGCACTTAACACACTATTACATTTTATCTCAACAGTAGTT  
CAATTTAATCTTTCATCCTC

In100 candidate2200 (in intron):

LOCUS ENSG00000179104

DESCRIPTION transmembrane and tetratricopeptide repeat containing 2

[SourceRefSeq\_peptide;Acc:NP\_689801]

GGGTTAGGGGATACTTTTTTTTCCTCCAAAAATACCTTGCTAATCTGTATAACCAAAGTAAGTTTTCTTTTGACCCAGTC  
ACTTTTCTAGACTTATTTTA

In100 candidate2201 (in intron):

LOCUS ENSG00000179104

DESCRIPTION transmembrane and tetratricopeptide repeat containing 2

[SourceRefSeq\_peptide;Acc:NP\_689801]

TTTCTTTTTCTGTCATGATTTATTTTTCATCTAGACCTAACCAAATTATTCTGTATTCTATTGCTCAGAGGCATTTATT

GGATCTCAGTTTCTCTTCTT

In100 candidate2202 (in intron):

LOCUS ENSG00000179104

DESCRIPTION transmembrane and tetratricopeptide repeat containing 2

[SourceRefSeq\_peptide;Acc:NP\_689801]

AAATTTATGGAAATTAAAAACAATTTCTAATCTATCATTTTAACAACACTACAAGCATTTTTGTGTATTTTATTCCAGTC

TTTCATCTTTGCTTCAGTAT

In100 candidate2203 (in intron):

LOCUS ENSG00000179104

DESCRIPTION transmembrane and tetratricopeptide repeat containing 2

[SourceRefSeq\_peptide;Acc:NP\_689801]

TATATTTTGTGTATAGTAGACACAATATTAATTTGGGGGGTATATTAACCTATGAAAGAACTATCTTCTGTTTTTCAGAT

TATTTCTCTTCTGTTCACA

In100 candidate2204 (in intron):

LOCUS ENSG00000102524

DESCRIPTION Tumor necrosis factor ligand superfamily member 13B (TNF- and AOL- related leukocyte expressed ligand 1) (TALL-1) (B lymphocyte stimulator (BLyS) (B cell-activating factor) (BAFF) (Dendritic cell- derived TNFlikemolecule)

(CD257 antigen) [Contains: Tu [Source:Uniprot/SWISSPROT;Acc:Q9Y27]

ATTATATAGGGACATTTAAAGTATGATTTTAGACTAACTTCTATAGCTCTATTTTACTATTTTATCCTTATATTACAGTC  
CCTCAATCTTCTTTTATTC

In100 candidate2205 (in exon):

LOCUS ENSG00000102524

DESCRIPTION Tumor necrosis factor ligand superfamily member 13B (TNF- and  
AOL- related leukocyte expressed ligand 1) (TALL-1) (B lymphocyte stimulator  
(BLyS) (B cell-activating factor) (BAFF) (Dendritic cell- derived  
TNFlikemolecule)

(CD257 antigen) [Contains: Tu [Source:Uniprot/SWISSPROT;Acc:Q9Y27]

GTACCATACTTAAGAATGCTGTAATACTTATCTTTTATAACATGTTTCCTTCGCTTTGCTTGTCTTTTATGTCATCAGTT  
TTAACTGTTTACTTCATTTA

In100 candidate2206 (in intron):

LOCUS ENSG00000072041

DESCRIPTION Orphan sodium- and chloride-dependent neurotransmitter transporter  
NTT73 (Orphan transporter v7-3) (Solute carrier family 6 member 15).

[Source:Uniprot/SWISSPROT;Acc:Q9H2J7]

TAACTTTTCATTTCTTTTTTGTGAACTTTCTTTACATCTGTCCTCCATGCCTCAGATATAGTTTCAGTAGTGTTTATTCT  
AGTTTCTGTTGTTTCTTTTT

In100 candidate2207 (in intron):

LOCUS ENSG00000143919

DESCRIPTION CDNA: FLJ23451 fis, clone HSI06456.

[Source:Uniprot/SPTREMBL;Ac:Q9H5G8]

TTTCCCCCCTTGGGTAATTTTTTTTAATTGTCTAAGGGATTAACTGTACCTCATTATCTTTGTTAATCACTTTCAGAG

CTTTTCGCTATTGTTTCATCA

In100 candidate2208 (in intron):

LOCUS ENSG00000161241

DESCRIPTION F-box only protein 17 (F-box only protein 26).

[Source:Uniprot/WISSPROT;Acc:Q96EF6]

TGATCGCTGGTGCCTCGTTTTTAACTTTTTCCACTTTTTATTCTCTGGTATCTATTTCCAAATCTTTACAGCATATTTT

TGGATTGTTATTTCTTATTT

In100 candidate2209 (in intron):

LOCUS ENSG00000133640

DESCRIPTION leucine-rich repeats and IQ motif containing 1 isoform 2

[Source:RefSeq\_peptide;Acc:NP\_115541]

GATTGTTTTCTGTGCATTTGGAAAATCACTGCTGTAATTCTCTTAACAATAAATTGTATTTTTATATGTCAGTAATTATT

TTTCTACTTGTATTTATCAT

In100 candidate2210 (in intron):

LOCUS ENSG00000041515

DESCRIPTION myosin heavy chain Myr 8 [Source:RefSeq\_peptide;Acc:NP\_055826]

EXON

TCGGTGCCTAAAGTGATGCTTGTAACTTTTACATCATCCTTCTCCATTGCCTACTATTCATTTCCAATGTTGTTTCAGCT

CTCATTCATTCATTTGTTTG

In100 candidate2211 (in intron):

LOCUS ENSG00000041515

DESCRIPTION myosin heavy chain Myr 8 [Source:RefSeq\_peptide;Acc:NP\_055826]

EXON

AAAGATAGATTTCTAAATTATTTTATTTTATGAATTTTCTGATTAACACATTCTTGTTCTTGCTTCTAACTTGTCAGCA  
TTCTTCTTTTTTCTAAAATTA

In100 candidate2212 (in intron):

LOCUS ENSG00000041515

DESCRIPTION myosin heavy chain Myr 8 [Source:RefSeq\_peptide;Acc:NP\_055826]

EXON

AGAATTATTTGATTTTTATAACTTAAACATGAAAATATATCATTTTGCTTTTACCTTTTCAGCTTAACTGTGTTTTTTGT  
TATTTGTTTTGTTTTGTTTT

In100 candidate2213 (in intron):

LOCUS ENSG00000180318

DESCRIPTION Cartilage homeoprotein 1 (CART-1).

[Source:Uniprot/SWISSPROT;Ac:Q15699]

CTGATGTCAAATGTGGCCTATTAAGCCCTTAACTCCATTTAAAAATGTGTCTCTTTTTCTATGTTTTTTTTTTTCAGTT  
TTCAAATTGCTTATTCTCTA

In100 candidate2214 (in intron):

LOCUS ENSG00000204894

DESCRIPTION Phosphoserine phosphatase-like protein (L-3-phosphoserinephospatase  
homolog). [Source:Uniprot/SPTREMBL;Acc:O15172]

GAAGATTATTTATTTTAACCCTTCTTTGGGTTTTCTTCGTTCCCCTCTTTTTCTGTCTCTTAACCCTTTCATTTTCAGTG

TTCTTCACTTCACTTTATTA

In100 candidate2215 (in intron):

LOCUS ENSG00000134452

DESCRIPTION F-box only protein 18 (EC 3.6.1.-) (F-box DNA helicase 1).

[Source:Uniprot/SWISSPROT;Acc:Q8NFZ0]

CGAGAGGCGTTAACTCTCCTGCAACTAATTTTCGACTTTTCCCCTCGTCTTTTCTTTTTTCTGTTCCCGACAGTTGTCT  
GTTCCCGACAGTTGTTTCCT

In100 candidate2216 (in intron):

LOCUS ENSG00000133627

DESCRIPTION actin-related protein 3-beta isoform 2

[Source:RefSeq\_peptide;Ac:NP\_001035225]

AACATTTTTTTTCCATTAAAATTTATAACATTTACATTCTGTTCTTAATCCCAGAAAATAAAAGTCTTTTTTTTTTTTTTT  
TTTTTTTTTTTTTTTTTGAGAC

In100 candidate2217 (in intron):

LOCUS ENSG00000068784

DESCRIPTION S1 RNA binding domain 1 [Source:RefSeq\_peptide;Acc:NP\_060549]

AGAACTATTTGCATATAACCACTGCAAAAGAGTTGTTTTGTTTTTCTTTGTTTACTTAGCTGCTTACAGTATACACATTT  
CCACTTTATTCCCTGATGTT

In100 candidate2218 (in intron):

LOCUS ENSG00000068784

DESCRIPTION S1 RNA binding domain 1 [Source:RefSeq\_peptide;Acc:NP\_060549]

ACTTGTTTCCCTTATTCTAATGGCTCTTAACGATTATTCTTCCTTTTCCGGTTTGTTGTAGTTTTGTGTTTCCTCAGAT  
ATTTTTTCTTGTTGCTATCA

In100 candidate2219 (in intron):

LOCUS ENSG00000068784

DESCRIPTION S1 RNA binding domain 1 [Source:RefSeq\_peptide;Acc:NP\_060549]

GCTGTGGCCACCTTTTATCTTACTTTCCCTTAGACCTTCTAACCCATCACTCCTTCTTTTCATTGCTTACCCTCTCAGAA  
CTATCTGCCTCTAATTCTTT

In100 candidate2220 (in intron):

LOCUS ENSG00000130226

DESCRIPTION Dipeptidyl aminopeptidase-like protein 6 (Dipeptidylpeptidase V)

(Dipeptidylpeptidase 6) (Dipeptidyl peptidase IV-like protein) (Dipeptidyl  
aminopeptidase-related protein) (DPPX). [Source:Uniprot/SWISSPROT;Acc:P4268]  
CACATTAGTCAAACTAAGAACTGGCATTGATACACGGCTATTAAGTCAACTATAGACTTTCTTTGGATTTCACCAGTT  
TTCCCATGAATATTTTCTCT

In100 candidate2221 (in intron):

LOCUS ENSG00000130226

DESCRIPTION Dipeptidyl aminopeptidase-like protein 6 (Dipeptidylpeptidase V)

(Dipeptidylpeptidase 6) (Dipeptidyl peptidase IV-like protein) (Dipeptidyl  
aminopeptidase-related protein) (DPPX). [Source:Uniprot/SWISSPROT;Acc:P4268]  
TTTTTAAGGTCTTGTGACATTTGGGTTATGCTGGAATTTGTTTTTAAGTATTTAAAGATTTCTATTTTGTCCCACAGTG

GTTGTCTTCTTTATCTTTAA

In100 candidate2222 (in intron):

LOCUS ENSG00000171132

DESCRIPTION Protein kinase C epsilon type (EC 2.7.11.13) (nPKC-epsilon).

[Surce:Uniprot/SWISSPROT;Acc:Q02156]

TTGATGTCTTCATGATTTGGCTTAAAAGAAAGGGTATTTCCATTCATTTAACCTAATTTAGAGTTGTCTGTCTTTCAGGA

CCTATTACTTTATTCTTTTA

In100 candidate2223 (in intron):

LOCUS ENSG00000171132

DESCRIPTION Protein kinase C epsilon type (EC 2.7.11.13) (nPKC-epsilon).

[Surce:Uniprot/SWISSPROT;Acc:Q02156]

AATATTGAAGCTTCTAATCCATGAACATGAAATAACTCTTTATTTATTTAGATCTTCCTTGATTTCTTGTGTCAGTGGTC

TATAGTTTTCTTAGTTTTCT

In100 candidate2224 (in intron):

LOCUS ENSG00000116016

DESCRIPTION Endothelial PAS domain-containing protein 1 (EPAS-1) (Member ofPAS protein 2) (Basic-helix-loop-helix-PAS protein MOP2) (Hypoxia- inducibl factor 2 alpha) (HIF-2 alpha) (HIF2 alpha) (HIF-1 alpha-like factor) (HLF)

[Source:Uniprot/SWISSPROT;Acc:Q99814]



TATCACCTCCCTAGGGAAGCATTTTCTCACCTCCTTTAGTTAACCTCCCTCCTGTTCTGTTTTGTTTTGTTTTAGCAGTA  
CTTCCCACATGTTGTTATTT

In100 candidate2225 (in intron):

LOCUS ENSG00000198707

DESCRIPTION Centrosomal protein Cep290 (Nephrocystin-6) (Tumor antigen se2-).

[Source:Uniprot/SWISSPROT;Acc:O15078]

TTAACACATTCTCTGTTTTCTAATCTGCTTTACTCCTAATTACCTCTGTACTGTATATACTTCAGTCTGTCACTATCCAG  
TTGATTTGCCTTGCTGTTTT

In100 candidate2226 (in intron):

LOCUS ENSG00000198707

DESCRIPTION Centrosomal protein Cep290 (Nephrocystin-6) (Tumor antigen se2-).

[Source:Uniprot/SWISSPROT;Acc:O15078]

TAACATACTAGACATGTACTTGTCTTTTGTTTCATCTTTTTTTTTTCTTTTTTTATTAGACCATAAACTTTGATGGCAGGA  
ACTTTGCCTATTTTATTTAT

In100 candidate2227 (in intron):

LOCUS ENSG00000198707

DESCRIPTION Centrosomal protein Cep290 (Nephrocystin-6) (Tumor antigen se2-).

[Source:Uniprot/SWISSPROT;Acc:O15078]

GCCTATATGTAATAACACCACAATACCCATGGTACCATTACGTTTGTTGTTTTCTGTTTTTCAATTGTTCTTTCAGTC  
TTGGTTCCCTTAATCTTAAT

In100 candidate2228 (in intron):

LOCUS ENSG00000146910

DESCRIPTION

AGGAACAATATTAAGTTATTAATAGTCTTTTTTTTTTGCCACCAATAACAGGTCAGGTTGGATTCAATCTGTTCTTTATA  
CTTTGCACCCATTTTTCTTC

In100 candidate2229 (in intron):

LOCUS ENSG00000139324

DESCRIPTION transmembrane and tetratricopeptide repeat containing 3

[SourceRefSeq\_peptide;Acc:NP\_861448]

AGTCTTTGGCATTCTTGGCTTGTAAGTCCATCACTTCAATCTACTTTGTCTTCACATTGCCTTCTTTTCCAGTGTATCT  
CTTTCTTCTCTTTTTATGAG

In100 candidate2230 (in intron):

LOCUS ENSG00000108774

DESCRIPTION Ras-related protein Rab-5C (RAB5L) (L1880).

[Source:Uniprot/SWISPROT;Acc:P51148]

AGGAATCCCATTGTCTTGACCTTATTTGTGTTTAACATTTGGGTATCTTTGTTCTCCGTTGGTCTTTTCCAATTCAGGT  
ATCATCTTTTTGATTGTCTT

In100 candidate2231 (in intron):

LOCUS ENSG00000184863

DESCRIPTION Proline-rich protein 8. [Source:Uniprot/SWISSPROT;Acc:Q9NSV0]

TTCATGACCTCTCACTGGTCTAGGACCCAAGCCACATAACCCATCGTTGTCTCTCCATTCCCCTTTGTTGTGTGACAGTT  
TCTTAGTGTTTCCCTGTATT

In100 candidate2232 (in intron):

LOCUS ENSG00000119878

DESCRIPTION postsynaptic protein CRIPT [Source:RefSeq\_peptide;Acc:NP\_054890  
GAGGAGGAGGCTGGGAGAACCTAACTGAGCTCTCCCGGGAACTTTGCTTTCTCGTTGTTTTTTCTTCGCCCACAGGTCTC  
AGATTCTATCCGCTGTCTTT

In100 candidate2233 (in intron):

LOCUS ENSG00000163617

DESCRIPTION KIAA1407 (KIAA1407), mRNA [Source:RefSeq\_dna;Acc:NM\_020817]  
CTTTTTCATATCTAATGTTTTGGATACATAACCTGGACTCCTTGCCTTTGTATTTTTCTTGTCCTCTTGTGTCCACAGTT  
ATTCTCCTGCGTCCTAATTT

In100 candidate2234 (in intron):

LOCUS ENSG00000105983

DESCRIPTION Limb region 1 protein homolog (Differentiation-related gene 14  
rotein). [Source:Uniprot/SWISSPROT;Acc:Q8WVP7]  
GAAAGATAAATTCTGGAAGCATGTATGTTTATGGATCAATAACAATAGAAAGAGCCTTCTTTTATGCTCCAGAATTTATC  
TTTTTAATCATACATGTCCC

In100 candidate2235 (in intron):

LOCUS ENSG00000105983

DESCRIPTION Limb region 1 protein homolog (Differentiation-related gene 14  
rotein). [Source:Uniprot/SWISSPROT;Acc:Q8WVP7]  
TATCCTAAATTAACCTTTACATTCTCCTGGATGACTTTATTCTGTCTTTTCTTCCCTCAGATCTTCACCTTACTCTCCACT

GGTGACCTTGTTTTCTATTT

In100 candidate2236 (in intron):

LOCUS ENSG00000171150

DESCRIPTION Suppressor of cytokine signaling 5 (SOCS-5) (CytokineinducibleSH2-containing protein 5) (Cytokine-inducible SH2 protein 6) (CIS-6).

[Source:Uniprot/SWISSPROT;Acc:O75159]

GTTTTCCTTGAGCAAAGATTTTAATTACTGATTCAAAGCTTTAACGGCTACTGATTTTTAATTTCTTCTTGAGTCAGTT  
TTGGTAATTTATGTTTTTCT

In100 candidate2237 (in intron):

LOCUS ENSG00000131504

DESCRIPTION Protein diaphanous homolog 1 (Diaphanous-related formin-1) (DRF).

[Source:Uniprot/SWISSPROT;Acc:O60610]

AAAGTCTTGGATATTGATGATCATTATAATAGCTAGTTATAACTGTAGCTCTTTTGTCTTCTCTCCAGGTATTTATGCC  
CTTACACTAGTGTATCTTTC

In100 candidate2238 (in intron):

LOCUS ENSG00000068724

DESCRIPTION Tetratricopeptide repeat protein 7A (TPR repeat protein 7A).

[Source:Uniprot/SWISSPROT;Acc:Q9ULT0]

AGCATTAAATTTCTAGTAAGGCTAACAATGCTATATCCCTTCTGTGTTTCTTACAGATTGTTTTTATTTTTTTGAGCTTTT  
TGTTTTTTGGCCTTGAAGCTT

In100 candidate2239 (in intron):

LOCUS ENSG00000196243

DESCRIPTION Putative uncharacterized protein C12orf37.

[Source:Uniprot/SWISPROT;Acc:Q96LM1]

TCTTTTCAACCTTTAACTTTCATTCTTCATTATATCCATTTTCTTTCAACAGACCTCCAGATAGTGCTATTACTTTGCTT  
TTATACTGTATTTTATTTTT

In100 candidate2240 (in intron):

LOCUS ENSG00000175893

DESCRIPTION Probable palmitoyltransferase ZDHC21 (EC 2.3.1.-) (Zinc  
fingerDHHC domain-containing protein 21) (DHHC-21).

[Source:Uniprot/SWISSPROT;Acc:Q8IVQ6]

TTGATAACTTTAACTTTGAGATCCCCTTGTGGGTCCGTTTCTGTTGACTCTTTTTTTCTTCTCAATTTCCAGATATTTGG  
CCCTGTCTTCTGACATGTCT

In100 candidate2241 (in intron):

LOCUS ENSG00000134905

DESCRIPTION Probable cysteinyl-tRNA synthetase, mitochondrial precursor  
(EC6.1.1.16) (Cysteine--tRNA ligase) (CysRS).

[Source:Uniprot/SWISSPROT;Acc:Q9A77]

TACACTCGCGGCATGTAATGATCTCCTTTCATTAACACAAGAGGTTCAATTTGTTCTGTTTGTTTCCAGTGTGGTGGTCTC  
TCTCTTCCCCTTTTCAATTT

In100 candidate2242 (in intron):

LOCUS ENSG00000177189

DESCRIPTION Ribosomal protein S6 kinase alpha-3 (EC 2.7.11.1) (S6K-alpha 3)(90 kDa ribosomal protein S6 kinase 3) (p90-RSK 3) (Ribosomal S6 kinase 2) RSK-2) (pp90RSK2) (Insulin-stimulated protein kinase 1) (ISPK-1) (MAP kinasactivated protein kinase 1b) (MAPKAPK1 [Source:Uniprot/SWISSPROT;Acc:P5181] AGTCTTTCAATTTTAACTTTATGTTGTTTAATTTATGCACGTTTTTTTCTTCAGGCAGATCTACCAATCTTCTTTTGTGATTTATTCTGACTCTCATTCT

In100 candidate2243 (in intron):

LOCUS ENSG00000139329

DESCRIPTION Lumican precursor (Keratan sulfate proteoglycan lumican) (KSPG umican). [Source:Uniprot/SWISSPROT;Acc:P51884] AGTACATAGTGGTCATTTGAAAAGGTAACATAATAGTTTCCTTTCTTTCTTCCTTATCTTTGTACATTTAGTCAGGTATTCTCCTTGTCTTTTTTATGTAT

In100 candidate2244 (in intron):

LOCUS ENSG00000033627

DESCRIPTION Vacuolar proton translocating ATPase 116 kDa subunit a isoform (V- ATPase 116 kDa isoform a1) (Clathrin-coated vesicle/synaptic vesicle poton pump 116 kDa subunit) (Vacuolar proton pump subunit 1) (Vacuolar adenoine triphosphatase subunit Ac116). [Source:Uniprot/SWISSPROT;Acc:Q93050]

TCAAAAAAAAAAATAATAATAAAAAATAAATAAATAGTAACATTAATGTCATTTTTATGGCATTTTCACCTTCAGAGTTC  
TTCAATATATTTATTTGTCT

In100 candidate2245 (in intron):

LOCUS ENSG00000095002

DESCRIPTION DNA mismatch repair protein Msh2 (MutS protein homolog 2).

[Source:Uniprot/SWISSPROT;Acc:P43246]

AACACACAAGTTTGTGTGATGCTGTTTGTCTGGGGTCCACGCTTGCCTAACTTCTGATGTGATTATTTCTGCCAGTTTCT  
TTTTTTGTTGTTGTTTTATT

In100 candidate2246 (in intron):

LOCUS ENSG00000181722

DESCRIPTION Zinc finger and BTB domain-containing protein 20 (Zinc finger  
potein 288) (Dendritic-derived BTB/POZ zinc finger protein).

[Source:UniprotSWISSPROT;Acc:Q9HC78]

TATTTTTGTGGAAGCATTTTATTTCTTCTCTAATTATTTCTAACTTTTCTCTGCATTTGTCTTCCCTAGTTTGCTCAGTT  
TTCCTTTTACTACCTCTTC

In100 candidate2247 (in intron):

LOCUS ENSG00000181722

DESCRIPTION Zinc finger and BTB domain-containing protein 20 (Zinc finger  
potein 288) (Dendritic-derived BTB/POZ zinc finger protein).

[Source:UniprotSWISSPROT;Acc:Q9HC78]

TAGGGCTAACATGTTTTGTTTTTCTTAATTTTCTCTGTATTTTCAGATCAAATTTCACTCCTCTGTTATACTCTTATTCTT  
CTAGATTTTATGTACAATT

In100 candidate2248 (in intron):

LOCUS ENSG00000181722

DESCRIPTION Zinc finger and BTB domain-containing protein 20 (Zinc finger protein 288) (Dendritic-derived BTB/POZ zinc finger protein).

[Source:UniprotSWISSPROT;Acc:Q9HC78]

TCTCTATCTCTTTATTAACTTCTCATTTTGTTCTTGTATCTTTTTCCTAATTTTATTAGCTATCTCTCAGTGTCTCT  
TGTAACCTCACTGGGCTTCTT

In100 candidate2249 (in intron):

LOCUS ENSG00000181722

DESCRIPTION Zinc finger and BTB domain-containing protein 20 (Zinc finger protein 288) (Dendritic-derived BTB/POZ zinc finger protein).

[Source:UniprotSWISSPROT;Acc:Q9HC78]

GTAACCAATTTTGGTGTGAGTTATGATTACTTATTTTCCCTTTTTTTCAATTGCACTATTATTGTTTTCTCTTAGCAGAA  
TTTGTCTCACTCTTTATCAC

In100 candidate2250 (in intron):

LOCUS ENSG00000155093

DESCRIPTION Receptor-type tyrosine-protein phosphatase N2 precursor (EC 3.13.48) (R-PTP-N2) (Islet cell autoantigen-related protein) (ICAAR) (IAR) (Phgrin). [Source:Uniprot/SWISSPROT;Acc:Q92932]



GTCAAGTAGTGACAATTCTCTGGGAATGGGGCTTTGAAGGCACTCTAACCCACCCCTGTGCTTTCTGGTGGCTTCCAGGC  
TGTTGGTTTTTACTGCCATT

In100 candidate2251 (in intron):

LOCUS ENSG00000155093

DESCRIPTION Receptor-type tyrosine-protein phosphatase N2 precursor (EC  
3.13.48) (R-PTP-N2) (Islet cell autoantigen-related protein) (ICAAR) (IAR)  
(Phgrin). [Source:Uniprot/SWISSPROT;Acc:Q92932]

CCCTCTAGCACGGGGACCCTAAAAAATTCTTGATGTTGAAGCAATATAACTTGTGTTGCAATTTTACTTCTTTGGCAGTG  
TTGTCTTTTCCTTTGCGATG

In100 candidate2252 (in intron):

LOCUS ENSG00000185565

DESCRIPTION Limbic system-associated membrane protein precursor (LSAMP).  
[Source:Uniprot/SWISSPROT;Acc:Q13449]

CACTTAACATCTCTCTTCCTTAACATCTCAATTCTGTTTCTTCTTATTTTCTCTCCCATTTATTACTACCCATACACAGGC  
CCATATTATTTCTTGCTTAG

In100 candidate2253 (in intron):

LOCUS ENSG00000185565

DESCRIPTION Limbic system-associated membrane protein precursor (LSAMP).  
[Source:Uniprot/SWISSPROT;Acc:Q13449]

TTCTATTTTTTCCATTAGGTAAGGAGAGAATATTTTAACATTTCAATTCCTTTTCTACATTTATCTTTTTCAGGTTTATTC  
TTCTAGTGGAGTTTGCTTTC

In100 candidate2254 (in intron):

LOCUS ENSG00000185565

DESCRIPTION Limbic system-associated membrane protein precursor (LSAMP).

[Surce:Uniprot/SWISSPROT;Acc:Q13449]

GTTTTTGCCTCTTGCTAACATTCCTGTTTACGCTTTGTAATATTTTTCTCACAGACTAATCATATATATTATATAACTA  
ATCTTTTTCATTTTTCCTCT

In100 candidate2255 (in intron):

LOCUS ENSG00000185565

DESCRIPTION Limbic system-associated membrane protein precursor (LSAMP).

[Surce:Uniprot/SWISSPROT;Acc:Q13449]

AGAGAAGAAAGTAATGAACATAGGAGCGCCTGAGGAAACTAACATTTCCACTGAAATCTTCTTCAACTTCAGAAATGCCC  
CTTTTCCTTTTTTTCAGTTC

In100 candidate2256 (in intron):

LOCUS ENSG00000185565

DESCRIPTION Limbic system-associated membrane protein precursor (LSAMP).

[Surce:Uniprot/SWISSPROT;Acc:Q13449]

AACTCGTGCTAACTATGCTCAATGTTCTTTTGAACTCAGTTAACTCAAATAGCTCTCAAGCATGTTTTATTTCTTTTGCT  
TTCTAACCCCTACATTCCTT

In100 candidate2257 (in intron):

LOCUS ENSG00000155158

DESCRIPTION C9orf52 protein (Chromosome 9 open reading frame 52).

[Source:Uiprot/SPTREMBL;Acc:Q8IXZ6]

TGTGGCAATTGGAGACAATCATCTCTTCCGTAACCTCTGTTACGACTGACCTGTTCTGTTGTCTCTAGCTGTTTCTCAGCT  
TTCTTAATTTTGGCAGTTCT

In100 candidate2258 (in intron):

LOCUS ENSG00000102189

DESCRIPTION Early endosome antigen 1 (Endosome-associated protein p162) (Zic  
finger FYVE domain-containing protein 2). [Source:Uniprot/SWISSPROT;Acc:Q5075]

TAACATGACTATTCATAGTGTTCCTGCACCTTTGTTTATGCTCCTCCATTTGCTTAGAATGCTTTTCTCTCTGCCAGGT  
AAACTCCTATTTATTCTTTC

In100 candidate2259 (in intron):

LOCUS ENSG00000013561

DESCRIPTION E3 ubiquitin-protein ligase RNF14 (EC 6.3.2.-) (RING finger  
proein 14) (Androgen receptor-associated protein 54) (Triad2 protein)  
(HFB30).[Source:Uniprot/SWISSPROT;Acc:Q9UBS8]

GTAGAATTCTTAATCAAATAAATGTTTATGCATATAATTAACATTTTAATTGGTCTCTTATATTCCTTCTTGGTTCAGTT  
CTTGTTTGTGCTGTACCCT

In100 candidate2260 (in intron):

LOCUS ENSG00000170802

DESCRIPTION Forkhead box protein N2 (Human T-cell leukemia virus enhancer  
factor). [Source:Uniprot/SWISSPROT;Acc:P32314]

AGTACTATTAACATACATACTTTATTCCTATTTTCGCTAATTTTCCCTAATGTCTTTTTTTTGTTCAGAAATTTCACTTTC  
TATGACTTCTCTTTGTTTTG

In100 candidate2261 (in intron):

LOCUS ENSG00000068781

DESCRIPTION Stonin-1 (Stoned B-like factor).

[Source:Uniprot/SWISSPROT;Acc:9Y6Q2]

AAAATGTCTGAAGAATAAAAGAAAAACCCCTAGAGATAACCACCATTAACATATTGGTGTATTTTTTTCCAGCCTTTGTG  
GATGAGATTTTTTTTTTTTTT

In100 candidate2262 (in intron):

LOCUS ENSG00000068781

DESCRIPTION Stonin-1 (Stoned B-like factor).

[Source:Uniprot/SWISSPROT;Acc:9Y6Q2]

TTGATTCATTTGGTGTCTTGGTGTATAATGTAACATATGGTTTCAACTTTTTATTTTTTTTTTTCCAGGTGGCTAC  
TCAATCTTCCTAACATTTTT

In100 candidate2263 (in intron):

LOCUS ENSG00000138039

DESCRIPTION Lutropin-choriogonadotropic hormone receptor precursor (LH/CG-R  
(LSH- R) (Luteinizing hormone receptor) (LHR).

[Source:Uniprot/SWISSPROT;Ac:P22888]

AAACAAGGAAAAGGTTGGAAAGATTTTGTTTAACCATATACATGGCACTATTTGCATGTTTCCTCTTCAGCCTTCTGATTT  
AAATTTAATTGTCATTTCTT

In100 candidate2264 (in intron):

LOCUS ENSG00000173588

DESCRIPTION Coiled-coil domain-containing protein 41 (Renal carcinoma antigen NY- REN-58). [Source:Uniprot/SWISSPROT;Acc:Q9Y592]

TTTCGTTGAATTTTCTATCTGTATTCTCTTGATCTTTCCAAGTTTCCTTAACATTGTTATTTTAAATTTCTTTTCAGGC  
ATTTTTTTAGATTTCTTTTTC

In100 candidate2265 (in intron):

LOCUS ENSG00000170820

DESCRIPTION Follicle-stimulating hormone receptor precursor (FSH-R)  
(Follitopin receptor). [Source:Uniprot/SWISSPROT;Acc:P23945]

CTTTTGGTATCCTCTCTCCACATAGACTTCCCTGCCTCCAATAACCACTATTCTACTCTCTGCTTCTTTGAAGTCAGAC  
TTTTTTTAGCTTCCACATATG

In100 candidate2266 (in intron):

LOCUS ENSG00000170820

DESCRIPTION Follicle-stimulating hormone receptor precursor (FSH-R)  
(Follitopin receptor). [Source:Uniprot/SWISSPROT;Acc:P23945]

ACATCCCCTTGAGTATGCTAACTCCTTATTTTGATTCTCTTCTGTTTTATTTTACAGTCCCTTTTATCATCTTTTCCCAG  
TCCAATCATTAAACTTTGTT

In100 candidate2267 (in intron):

LOCUS ENSG00000145819

DESCRIPTION Rho GTPase-activating protein 26 (Oligophrenin-1-like protein)  
GTPase regulator associated with focal adhesion kinase).

[Source:Uniprot/SWSSPROT;Acc:Q9UNA1]

ACATACTGACGTACTGATTCTTTGAAAATAAATTTAAAACTTATATCTAACAATCCCTCCTCTTGCATTTTCCTTACAGCT  
TTCTTTTTTAAACTTTTTTAAC

In100 candidate2268 (in intron):

LOCUS ENSG00000145819

DESCRIPTION Rho GTPase-activating protein 26 (Oligophrenin-1-like protein)  
GTPase regulator associated with focal adhesion kinase).

[Source:Uniprot/SWSSPROT;Acc:Q9UNA1]

AGCTCTGCCCTGTAACTAGGCCACGTTTCCTTGACATTTTCAGTTTGTTACTGGTGTGACCCATTTTCTGAGTGGCTTCA  
TGTCCACTTTTCTCTTTCCC

In100 candidate2269 (in intron):

LOCUS ENSG00000120798

DESCRIPTION Orphan nuclear receptor TR2 (Testicular receptor 2).

[Source:Unprot/SWISSPROT;Acc:P13056]

ATAGACTAAAAGCCTGATTTAGGATGGTTAACCTTTAAATGATTGTTAGTCCTTTTTTAACATTCAATTTTCAGCATTT  
CTCTAGTTTTCTGGGGTTTT

In100 candidate2270 (in intron):

LOCUS ENSG00000179915

DESCRIPTION Neurexin-1-beta precursor (Neurexin I-beta).

[Source:Uniprot/SWSSPROT;Acc:P58400]

AGAAAATATAAGCATATTTAAATAAGACAATGTCACCGCATGTAATCATTAACATAAGTAAGGATTTGTCTTATGCAGAG  
TTGCTTTTATTGTTTGTTTT

In100 candidate2271 (in intron):

LOCUS ENSG00000179915

DESCRIPTION Neurexin-1-beta precursor (Neurexin I-beta).

[Source:Uniprot/SWSSPROT;Acc:P58400]

AATTTGAAATTCAATCTGCTTGTTACCTAACCTTGTGCCTATTCCCTCATCTATATTTACCTATTAAATATTTTCCAGTA  
ATATTTCCCTTTGTATTCTTA

In100 candidate2272 (in intron):

LOCUS ENSG00000164989

DESCRIPTION Uncharacterized protein C9orf93.

[Source:Uniprot/SWISSPROT;Acc:6TFL3]

CCATACTTAAATTTCTTGTTTTTTTGCTTTTCAAATTTTAAACATTCTAGAGTTTCCTTATCCTAATTTGTTGCACAGAA  
TTCTTTTCTTTGCCCCTTTT

In100 candidate2273 (in intron):

LOCUS ENSG00000164989

DESCRIPTION Uncharacterized protein C9orf93.

[Source:Uniprot/SWISSPROT;Acc:6TFL3]

GTGCGTATAAAATATGTGCCAAATTGTTCTCTTAAGTGGGTGTAACAATTTCAAAGAAGAGTTTCTCTTCCTTTACAGCC  
TCTTGGTATTTTTCAGATT

In100 candidate2274 (in intron):

LOCUS ENSG00000164989

DESCRIPTION Uncharacterized protein C9orf93.

[Source:Uniprot/SWISSPROT;Acc:6TFL3]

TGTAACATACTTTTATTCTTACTCTTATTCTCCATATTCTACATTTCTTATTGGGTTATTTTTTTATCCCAGCCCCATTG  
CTGTGGTCTTAGCTCATTTT

In100 candidate2275 (in intron):

LOCUS ENSG00000164989

DESCRIPTION Uncharacterized protein C9orf93.

[Source:Uniprot/SWISSPROT;Acc:6TFL3]

AGATAAAAAATCATGGAAAGAAAAATTTAACCTTTCAAACCTTTTTTTTCTACCCAAACTCTAATTCAGTTCTTTTTTCC  
AAAGATTATTAAGTTTCTTT

In100 candidate2276 (in intron):

LOCUS ENSG00000125772

DESCRIPTION Putative glycerophosphodiester phosphodiesterase 5 (EC 3.1.-.-)

[Source:Uniprot/SWISSPROT;Acc:Q9NPB8]

AGCTCATGTGCATACAATGACTAACATTTTTCATCTTACTCTTGTTTTTATGTATATCCAGAACTGACCTTCCCTTTCCA  
AGTTGTGATTTTTTTTTTTTC

In100 candidate2277 (in intron):



LOCUS ENSG00000180263

DESCRIPTION FYVE, RhoGEF and PH domain-containing protein 6 (Zinc finger FYE domain-containing protein 24). [Source:Uniprot/SWISSPROT;Acc:Q6ZV73]

CCTTTTGAAGCTTGTTAACTTCATTCTTGATTATTCTGTCCCTCATTTTCTTTGCCTTCATAACTTTAAAATGATCAGAA  
TCTGTCATCTTGGCTTTCCT

In100 candidate2278 (in intron):

LOCUS ENSG00000205000

DESCRIPTION

AATGCAAGATCTATGTTGAGGCCAAATTTAACTCACTTTTAAATTTTTGTATAAATCCTGGTTTTGCTTTTATTTTCAGAA  
TGTTACTGTTTTTTTGTGTTG

In100 candidate2279 (in intron):

LOCUS ENSG00000028203

DESCRIPTION Vezatin. [Source:Uniprot/SWISSPROT;Acc:Q9HBM0]

CAATATGATTATTATAACTCTTTCCAAATATTGCTGTTTTTCAGCTATTCTCAGACACATCCCCCTTATACTCCCCTCTT  
TCTTTTCTTTTCTTTTTTTT

In100 candidate2280 (in intron):

LOCUS ENSG00000082701

DESCRIPTION Glycogen synthase kinase-3 beta (EC 2.7.11.26) (GSK-3 beta).

[Source:Uniprot/SWISSPROT;Acc:P49841]

GGTTACCTGTATATAACCTTGAGCAATTTTACTTATTTTTTGAGTCTCAGTTCCTTCTCCCTGATTTAGTACTGGTTCT  
TCCTCCTTTGTAGGACTGTT

In100 candidate2281 (in intron):

LOCUS ENSG00000082701

DESCRIPTION Glycogen synthase kinase-3 beta (EC 2.7.11.26) (GSK-3 beta).

[Surce:Uniprot/SWISSPROT;Acc:P49841]

TGTCCTTCTAGTCTGTCATTTTCTCTAACTGGGACTACATTCTCATTTTAGCAGAGCTATGGGCCTTTCCCCTTTCTGTC  
CTTCCAAATTTGCTATTTTT

In100 candidate2282 (in intron):

LOCUS ENSG00000082701

DESCRIPTION Glycogen synthase kinase-3 beta (EC 2.7.11.26) (GSK-3 beta).

[Surce:Uniprot/SWISSPROT;Acc:P49841]

ATGCATTTGGGAATTTAAAAAATTCTCTCATTTCTCTATAACATCTCTGACTTTCTTTCCCTCTTTTTTTTTCTATCAGTC  
TCTTTCTCTAGCCCTTTTTT

In100 candidate2283 (in intron):

LOCUS ENSG00000111142

DESCRIPTION Methionine aminopeptidase 2 (EC 3.4.11.18) (MetAP 2) (PeptidaseM  
2) (Initiation factor 2-associated 67 kDa glycoprotein) (p67) (p67eIF2).

Source:Uniprot/SWISSPROT;Acc:P50579]

CTCATCTGTGCTCATTATTCTCTGTGATCCTGCTGTAATAACTTCCTTATAGACTATTTTCTATATTTCTTTAACAGAA  
TTCTGTCTCTCTTTGTAGAC

In100 candidate2284 (in intron):

LOCUS ENSG00000068912

DESCRIPTION XTP3-transactivated gene B protein precursor.

[Source:Uniprot/SISSPROT;Acc:Q96DZ1]

TTCTTAGAGTGGATTTTTCTTGTTTATGTAGAGAAAAGTGTAGGAGCTAACTTCTTAGTGATCTTTGTCTTCTCAGGT  
TCTATCCTTTATTCCTTCAT

In100 candidate2285 (in intron):

LOCUS ENSG00000205549

DESCRIPTION

CTTTAAGTCCCCTGTGAGCTTCCCAATCAATTACAATTTCTCCTGCTTTTAACTACCAACACACTACATATCTTTCAGTT  
GGCATTCTCTTAACTTTTTA

In100 candidate2286 (in intron):

LOCUS ENSG00000171984

DESCRIPTION Novel protein. [Source:Uniprot/SPTREMBL;Acc:Q5TGA6]

TGTGTTGGGACTAGAGAGGAGTTGGCTACTCATACTTTTAACTTTTGTTGCTTGTGTTTCTCATTCAGAAGTGGTTACC  
TTTGTTTCATTCATTTGTTT

In100 candidate2287 (in intron):

LOCUS ENSG00000173068

DESCRIPTION Zinc finger protein basonuclin-2.

[Source:Uniprot/SWISSPROT;AccQ6ZN30]

CATTCCGATTAAAAAAGAATTGATCCTTTAACAACAAAATAATATCCTTTTGTTTTTCTTTAATTAAGCCCATCAGTT  
TTTCATTTCTCTCTGTAAAG

In100 candidate2288 (in intron):

LOCUS ENSG00000163430

DESCRIPTION Follistatin-related protein 1 precursor (Follistatin-like 1).

[source:Uniprot/SWISSPROT;Acc:Q12841]

AGAGGAATGATTGTGTAAGTAGTGGCTCCCCCTTCTCTGTGTGCTCTTCAAACGGGCCTTTTGTTTTTCCATTCAGTG  
AGTCCTTCTGTTCTCTATTA

In100 candidate2289 (in intron):

LOCUS ENSG00000044459

DESCRIPTION Uncharacterized protein C9orf39.

[Source:Uniprot/SWISSPROT;Acc:9NXG0]

GTAGATTATTGATTTGAGATTTTTCCTGTTTTGTAACGTACACCTTTAATTTTATAAATTTTCCTCTCAGCTGCTTTAAC  
TTCATCCCCCATATTTTGAT

In100 candidate2290 (in intron):

LOCUS ENSG00000044459

DESCRIPTION Uncharacterized protein C9orf39.

[Source:Uniprot/SWISSPROT;Acc:9NXG0]

TTAGATGATAATTGCTCTTTAACATTATATTTTCAATTTTTCCTTACCTTCTAGGAAGCTCAGAAGTTTGTTCATAATT  
GCAATTACTTCTTTTATCCC

In100 candidate2291 (in intron):

LOCUS ENSG00000044459

DESCRIPTION Uncharacterized protein C9orf39.

[Source:Uniprot/SWISSPROT;Acc:9NXG0]

GTAAAGGCCAATATTTGAACCCCTCCATTTAACACCTTTAATTTTTATCATATTTCAAGCTTATCTCTTTATCAGCTTCT  
GAATCACATTGTCTCATTTT

In100 candidate2292 (in intron):

LOCUS ENSG00000044459

DESCRIPTION Uncharacterized protein C9orf39.

[Source:Uniprot/SWISSPROT;Acc:9NXG0]

TATGTTAGATTATTTTTTGTCCGGCCTTCATATCTATTTTCTTAACAATTCTTTAATCTTTTGTCTTCTGCATCCAGTTT  
ATCTCAAGACTTTCCTTCAT

In100 candidate2293 (in intron):

LOCUS ENSG00000153767

DESCRIPTION Transcription initiation factor IIE subunit alpha (TFIIEalpha)(

General transcription factor IIE subunit 1) (General transcription factor

IE 56 kDa subunit). [Source:Uniprot/SWISSPROT;Acc:P29083]

AGATAATGAGAGGGTTGGAGTATTAACCTTTGTCTTAGCTGTGTTTCTATACTTTACCCCAGAGCATTTGCTTTTATGTT  
TATATATTAATCACCTTTCC

In100 candidate2294 (in intron):

LOCUS ENSG00000145087

DESCRIPTION Syntaxin-binding protein 5-like (Tomosyn-2) (Lethal(2) giant

larvae protein homolog 4). [Source:Uniprot/SWISSPROT;Acc:Q9Y2K9]

AATTTACATCATGTGAACTTTAATTCATGTTTTATAACTTTTATGAACTCCCTCTTATTCTTTTTTCAATGGCTCAGGT  
TTTTTTGCTCCCTGTCTCTT

In100 candidate2295 (in intron):

LOCUS ENSG00000145087

DESCRIPTION Syntaxin-binding protein 5-like (Tomosyn-2) (Lethal(2) giant  
larvae protein homolog 4). [Source:Uniprot/SWISSPROT;Acc:Q9Y2K9]

TTTAAAGATAACTTGTATTTTATATTTACCCATATATTTATCATTTTAAATGTTCTTTTTTCCTTTTTGTATATCCAGAT  
ACTATTTGATATCATTTCCC

In100 candidate2296 (in intron):

LOCUS ENSG00000145087

DESCRIPTION Syntaxin-binding protein 5-like (Tomosyn-2) (Lethal(2) giant  
larvae protein homolog 4). [Source:Uniprot/SWISSPROT;Acc:Q9Y2K9]

TCCACCTCATTTATCATGCACCTTTTTCCATAACTGATTTTTCCCTTAGCTCTCCTTTACGTTATTGATATTCTTCAGGA  
TATTATGTCTTTACCCTCAT

In100 candidate2297 (in intron):

LOCUS ENSG00000145087

DESCRIPTION Syntaxin-binding protein 5-like (Tomosyn-2) (Lethal(2) giant  
larvae protein homolog 4). [Source:Uniprot/SWISSPROT;Acc:Q9Y2K9]

CTATCTCATGCAAAATTATTCTCTTATCTTTACATCTATAACTCTCCTTACATCTCTTTCTGTCTCTACTATTTACAGTT  
CCTTTCTATCTTGTTTCTAT

In100 candidate2298 (in intron):

LOCUS ENSG00000145087

DESCRIPTION Syntaxin-binding protein 5-like (Tomosyn-2) (Lethal(2) giant  
larvae protein homolog 4). [Source:Uniprot/SWISSPROT;Acc:Q9Y2K9]

TGCCTGGCTAACAATTACGTATTTTCTCTAGTCTCTTTAAATCTCCAAACTTGCTTTTCTGTCTTCAATCTCAGCAATC  
ACCATGTGTCCTCTTTTATT

In100 candidate2299 (in intron):

LOCUS ENSG00000107295

DESCRIPTION SH3-containing GRB2-like protein 2 (EC 2.3.1.-) (Endophilin-1)  
Endophilin-A1) (SH3 domain protein 2A) (EEN-B1).

[Source:Uniprot/SWISSPROT;cc:Q99962]

TTTCCTCATCTTTAGTATTGATATTGCTTAACTTGTTTTAAATCTTATTTTGTCTGTTTTCTCACTCATTACTTCAGTA  
GTTATTTTTCCTCTATTTTTT

In100 candidate2300 (in intron):

LOCUS ENSG00000091009

DESCRIPTION RNA-binding protein 27 (RNA-binding motif protein 27).

[Source:niprot/SWISSPROT;Acc:Q9P2N5]

GAAGTACCAATATATGTGTATCTTTAATAAATATTAACAAATGTGAAAGTCAACTCCATTTTTACTTACTTTGTCCAGTA  
TGGTCTTATCTTTTTTTTTTT

In100 candidate2301 (in intron):

LOCUS ENSG00000147892

DESCRIPTION ADAMTS-like protein 1 precursor (ADAMTSL-1) (Punctin-1).

[Source:Uniprot/SWISSPROT;Acc:Q8N6G6]

TCCAATTCATAACACATGATATCTTTCCATTAATTTGTGTTTTCTTCAATTTTTTCATCAATCTTTTATAGTTTTCAGTG  
TCTTTCACCTTTCTTGATTAA

In100 candidate2302 (in intron):

LOCUS ENSG00000165990

DESCRIPTION Uncharacterized protein C12orf55 (Fragment).

[Source:Uniprot/SPREMBL;Acc:Q96N23]

GTAGTCAAACTATATTTGACTGAAAATGTCAAATGTGCCTTGATAACTTATCAAAATACATTTGACCTTTTCAGTTAGA  
CATTTACTCTATTTACTTTT

In100 candidate2303 (in intron):

LOCUS ENSG00000156475

DESCRIPTION Serine/threonine-protein phosphatase 2A 55 kDa regulatory subunit  
B beta isoform (PP2A, subunit B, B-beta isoform) (PP2A, subunit B, B55- bta  
isoform) (PP2A, subunit B, PR55-beta isoform) (PP2A, subunit B, R2-beta soform).

[Source:Uniprot/SWISSPROT;Acc:Q00005]

CCCTTGTTTGTTCTGCTCTAGGCACACTGATCCCTTAACACATGTTCAATTTCCCTCTTAGGGTCTTTCCATTGTCAGTTT  
CATCTCTTTGGAACACTCTT

In100 candidate2304 (in intron):

LOCUS ENSG00000188596



DESCRIPTION Putative uncharacterized protein C12orf63.

[Source:Uniprot/SWISPROT;Acc:Q6ZTY8]

GGTGATAACCCCTTTATCATTTTTTATTGTGTCTATCTGATTCTTCTCTCTTTTTTTCTTTATTAGTCTTGCTAGCAGTC  
TATCAATTTTGTTGATCCTT

In100 candidate2305 (in intron):

LOCUS ENSG00000088766

DESCRIPTION Cardiolipin synthetase (EC 2.7.8.-) (Cardiolipin synthase) (CLS  
(Protein GCD10 homolog). [Source:Uniprot/SWISSPROT;Acc:Q9UJA2]

TTCGAGGGCTCTGGGCTTTAGCTACTGTCACCCCATCATAACTGAGCTTCATGGATTGATTCTCTTTTTATCTTTCAGAT  
TTTCTTTTAAAAATCTTTGT

In100 candidate2306 (in intron):

LOCUS ENSG00000169302

DESCRIPTION Serine/threonine-protein kinase 32A (EC 2.7.11.1) (YANK1).

[Souce:Uniprot/SWISSPROT;Acc:Q8WU08]

ACATACTGACATATTAAGTCTTTGAAAAGAAATTTAGAACTCATATCTAACAATCCCTCCCCTTGTATTTTCCTTACAGCT  
TTCTTTTCAAACTTTTTTTTT

In100 candidate2307 (in intron):

LOCUS ENSG00000178031

DESCRIPTION Uncharacterized protein C9orf94 precursor.

[Source:Uniprot/SWISPROT;Acc:Q496M8]

GTTTAAGATTAAAAAAAATCAATCACACATTTTTTTTCTCCTATTATAACTTTGAATATTTTGTTATATTTTCCAGTC  
TCTTTTTTTAATTATACTTG

In100 candidate2308 (in intron):

LOCUS ENSG00000176049

DESCRIPTION Janus kinase and microtubule-interacting protein 2.

[Source:Unirot/SWISSPROT;Acc:Q96AA8]

GTTATATTTTTCTGTTTTATAACTTCTATTTTGTTCTTTCCCAAATTCCTATATAATATCACTTTTTATATTTTCAGGT  
TGCCTTTCAAATTTTTCATG

In100 candidate2309 (in intron):

LOCUS ENSG00000176049

DESCRIPTION Janus kinase and microtubule-interacting protein 2.

[Source:Unirot/SWISSPROT;Acc:Q96AA8]

CCTTCTGCCTAGAATATTCTTCTTTCCCACCATAACCCCTTGCTTACTGGTTCCTTCCTTCTTATTTTACAGATCTTAGT  
TACATATGTCACTTTTATTT

In100 candidate2310 (in intron):

LOCUS ENSG00000176049

DESCRIPTION Janus kinase and microtubule-interacting protein 2.

[Source:Unirot/SWISSPROT;Acc:Q96AA8]

ACACCTTACATTATGGTTTTAATTTTCCTCATTATTAAGAAGGTAGGGTAACTTTTCAAATATTTACTAGTCTTTCAGAT  
ATAATTTGTCCTTAGCCTTT

In100 candidate2311 (in intron):

LOCUS ENSG00000163406

DESCRIPTION Oligopeptide transporter, kidney isoform (Peptide transporter 2 (Kidney H+)/peptide cotransporter) (Solute carrier family 15 member 2).

[Source:Uniprot/SWISSPROT;Acc:Q16348]

AAAAAGAATCTCTGTGGTAACAAGGAAAGGCTATTCTTTTCATTATCAATTTTCCAATGTGTTTACATCCTCTTCAGTT  
GCGGTATCTTTTGTTTCCTTA

In100 candidate2312 (in intron):

LOCUS ENSG00000145103

DESCRIPTION immunoglobulin-like domain containing receptor 1

[Source:RefSeqpeptide;Acc:NP\_787120]

TTTTGTCTATAACACTTAAGTCTGATTTTTTTTTTTTTTTTACATTCGGCATCTGATTTTCCCCAAGCCAGCCCTCAGTTTT  
AGGGTACATCTGTCCTTCTT

In100 candidate2313 (in intron):

LOCUS ENSG00000155875

DESCRIPTION Uncharacterized protein C9orf138.

[Source:Uniprot/SWISSPROT;Acc:Q8IYX7]

ATTTGCATCTCTTTGTTATATGCGTACCAAATAACCATTAAGTTGCTTTTCTCTGACTTATACTTCAGGGGTGGCCCT  
GCTTTCTGTTATCCAATTC

In100 candidate2314 (in intron):

LOCUS ENSG00000125845

DESCRIPTION Bone morphogenetic protein 2 precursor (BMP-2) (BMP-2A).

[Source:Uniprot/SWISSPROT;Acc:P12643]

CCATTCCCTTGTTGTATTTTTTTTAAAATGGAATGTTTTTAACCTTTTGTATTTGATATTTTTTTTCTCCTTGATCAGTT

GTCTGTTATTTTATTATCTG

In100 candidate2315 (in intron):

LOCUS ENSG00000133710

DESCRIPTION Serine protease inhibitor Kazal-type 5 precursor (Lymphoepitheial  
Kazal-type-related inhibitor) (LEKTI) [Contains: Hemofiltrate peptide  
H6478; Hemofiltrate peptide HF7665]. [Source:Uniprot/SWISSPROT;Acc:Q9NQ38]

ACATTTTGTGTGTCTTGTTTCATAACTTGGTCAAACCTACCTTCCTTGACATTTTGCATAACTTTGGGTTTTCTCCAGCA  
TTTTTCTCTCTCTTCTATCT

In100 candidate2316 (in intron):

LOCUS ENSG00000197658

DESCRIPTION

TTTTATAAGATTAACGCTTTACAAAACCTTTTCACTTTGCTTAAACTTTCAGTTTTGTCTTATTCTCTCTTAGTTTAAGA  
CAGTCTTTAAAACCCCTCT

In100 candidate2317 (in intron):

LOCUS ENSG00000120868

DESCRIPTION Apoptotic protease-activating factor 1 (Apaf-1).  
[Source:Unipro/SWISSPROT;Acc:O14727]

AGGACTTTGTAACTGTTACTTCTCTTGTTGTATTAGTCTCTGCCACAAGTCTTCTTTCTTGCTTTTCTGCATGCAGCTT  
CTAAGATATTTTTTTTTCAT

In100 candidate2318 (in intron):

LOCUS ENSG00000147874

DESCRIPTION Protein FAM29A. [Source:Uniprot/SWISSPROT;Acc:Q7Z4H7]

AGATTTAACATATGAAAAAACTGGATTTTGTTCTAACTTCCTCCAGTAATATTCCTATTTTCTTTATTGCCTTTTTTTTTT  
CTCTATTATCCCATTTTGGA

In100 candidate2319 (in intron):

LOCUS ENSG00000184999

DESCRIPTION Solute carrier family 22 member 10 (Organic anion transporter 5.

[Source:Uniprot/SWISSPROT;Acc:Q63ZE4]

AAGGGCTTAACACTGCCATTTTGTTACCGATTTTCTACTTGTTTTGTACATTTTTTTCCCCTGCTTTCACCTTTACAGTT  
TTTATTTGTGGTTTTCTCTA

In100 candidate2320 (in intron):

LOCUS ENSG00000165632

DESCRIPTION Transcription initiation factor TFIID subunit 3 (TBPassociatedfactor  
3) (Transcription initiation factor TFIID 140 kDa subunit) (140  
kDa ATA box-binding protein-associated factor) (TAF140) (TAFII140).

[Source:Unirot/SWISSPROT;Acc:Q5VWG9]

AGTTAACACAACCTTAGTTTTGCTCTTTTTATTTCAGCATTATTTATGTTCTGCTTTTTTTTAAACGTATCATTTGTTATGTT  
TTCCTTGTTTCCTGTGTATTT

In100 candidate2321 (in intron):

LOCUS ENSG00000163001

DESCRIPTION Coiled-coil domain-containing protein 104.

[Source:Uniprot/SWISPROT;Acc:Q96G28]

AGTTTCTAACCATGCTACTTGTTATTGTACCATTTTCCTTTCTAACCCAGATTATCATCTCTGTTTCAAATTTCTTGCTGT  
GGTAACCTCACCTTAATTTTC

In100 candidate2322 (in intron):

LOCUS ENSG00000163001

DESCRIPTION Coiled-coil domain-containing protein 104.

[Source:Uniprot/SWISPROT;Acc:Q96G28]

TTTTGGCAAGTTTAAGCATTTGTTTTTAACTTTTTATACTTTTTTCTCCTTCTTTATTTTTGTCCTGGTAACTCACAGAA  
CAACATTTTTTTTTTTTTTTTTT

In100 candidate2323 (in intron):

LOCUS ENSG00000163001

DESCRIPTION Coiled-coil domain-containing protein 104.

[Source:Uniprot/SWISPROT;Acc:Q96G28]

CATTACTGGTATAAAGGAAAGTGATAAACTGTTATTAATTTGTATCCTGTAAACCTTGCTATATAATTATTCATTTTCAGTT  
TTTCTGTCAATTGTTTTGCA

In100 candidate2324 (in intron):

LOCUS ENSG00000114030

DESCRIPTION Importin alpha-1 subunit (Karyopherin alpha-1 subunit) (SRP1-bea)  
(RAG cohort protein 2) (Nucleoprotein interactor 1) (NPI-1).

[Source:Unirot/SWISSPROT;Acc:P52294]

GTGTGTTAAAGATTGATCCATGTTGTAACATGTATTGGTACTTCATTCCCTTTTCTCACTAAATATTCCATTGTGCAGAT  
ATACCACTTTTTGTTTATTG

In100 candidate2325 (in intron):

LOCUS ENSG00000114030

DESCRIPTION Importin alpha-1 subunit (Karyopherin alpha-1 subunit) (SRP1-bea)  
(RAG cohort protein 2) (Nucleoprotein interactor 1) (NPI-1).

[Source:Unirot/SWISSPROT;Acc:P52294]

TTTTGCCTTTTTCACTGTGCCTGTATTTTATGTTTCACACTAACATTCTCCCCCATTTTACTTTGCCATTCTACAGAA  
GTTTTTAAATCTTTTTTATT

In100 candidate2326 (in intron):

LOCUS ENSG00000182621

DESCRIPTION 1-phosphatidylinositol-4,5-bisphosphate phosphodiesterase beta  
(EC 3.1.4.11) (Phosphoinositide phospholipase C) (Phospholipase C- beta-  
1)(PLCbeta-

1) (PLC-I) (PLC-154). [Source:Uniprot/SWISSPROT;Acc:Q9NQ66]

TGATAAACCACTGTTAGATCCTCAAATGCTTCTCGTGAGGATGGATTTTAACTTAGAATACTCTGACTTTGTCAGCT  
TTTCTCCATCAGCTCTTTCT

In100 candidate2327 (in intron):

LOCUS ENSG00000182621

DESCRIPTION 1-phosphatidylinositol-4,5-bisphosphate phosphodiesterase beta

(EC 3.1.4.11) (Phosphoinositide phospholipase C) (Phospholipase C- beta-1) (PLCbeta-

1) (PLC-I) (PLC-154). [Source:Uniprot/SWISSPROT;Acc:Q9NQ66]

ATCATATTTCACTGTGATTAAATGTGAATGTTCTGGACTAACAAAGTTGAGCATCTTTTCGGATGTTTATTCAGGTTTT  
CACTTCTATGAAGTATCTTT

In100 candidate2328 (in intron):

LOCUS ENSG00000182621

DESCRIPTION 1-phosphatidylinositol-4,5-bisphosphate phosphodiesterase beta

(EC 3.1.4.11) (Phosphoinositide phospholipase C) (Phospholipase C- beta-1) (PLCbeta-

1) (PLC-I) (PLC-154). [Source:Uniprot/SWISSPROT;Acc:Q9NQ66]

TTAGCAATTTACTAGGTTGGTTATAACCCAAGAGATTTTTTTCTTTTTCTTTTAAGCTATGATTTTTTCCTTATTCCAGTT  
TTCCATTTGCTTGTTCTTTT

In100 candidate2329 (in intron):

LOCUS ENSG00000138041

DESCRIPTION SMEK homolog 2. [Source:Uniprot/SWISSPROT;Acc:Q5MIZ7]

GATATGTAATACTAAGCATAATTAAACTTTGTAACCTTGCTGTCATCTTTTTGATTATCAGATTGGTGCCTTTTTTATAC  
CAGAATTATTTCTTGTTTTT

In100 candidate2330 (in intron):

LOCUS ENSG00000164270

DESCRIPTION 5-hydroxytryptamine 4 receptor (5-HT-4) (Serotonin receptor 4) 5-HT4). [Source:Uniprot/SWISSPROT;Acc:Q13639]



TCATGTTTTCAAAAACCTAACTTCTGGGTTCATTGATCTTTTGAATGTTTTTTTGTGTCTTGATTTTCCTTCAATTCAGTT  
CTGATTTTGGTTATTTCTTG

In100 candidate2331 (in intron):

LOCUS ENSG00000164270

DESCRIPTION 5-hydroxytryptamine 4 receptor (5-HT-4) (Serotonin receptor 4) 5-HT4). [Source:Uniprot/SWISSPROT;Acc:Q13639]

AGACAAATATTAAAATTTTAAGGAAGCACCATCGGTTAACACTAGAACTCAATTTTTATTAATCCCTTTATTCAGTGATT  
TTTTTTTTCACCTACTTAATT

In100 candidate2332 (in intron):

LOCUS ENSG00000185046

DESCRIPTION cajalin 2 isoform a [Source:RefSeq\_peptide;Acc:NP\_690001]

TTGATTTTATCTGTTTAATATCCCTGTCGTTATTTTTTTTTTTAACTTTCTATTCCTTCTACTTCAGGT  
CCTTGTTATCTTTGATCTAG

In100 candidate2333 (in intron):

LOCUS ENSG00000185046

DESCRIPTION cajalin 2 isoform a [Source:RefSeq\_peptide;Acc:NP\_690001]

TTTATCTAACACTTAGGTTTATTTTACAAATCTCTTCAGGTTTTCACCTTTTCAGCCTTCATTTTTCATGTTTGGGGCTTT  
TCTAAAATGTCCTGTGATCC

In100 candidate2334 (in intron):

LOCUS ENSG00000185046

DESCRIPTION cajalin 2 isoform a [Source:RefSeq\_peptide;Acc:NP\_690001]

GCTCCCTGGGGACATTTGTTAAGAATTAATAACTGAATCCAAGAGTGTTGAATCCTATTTTTCCTTCTCCATGTCAGCTT  
CCCCTCCTTTACATTGTTGT

In100 candidate2335 (in intron):

LOCUS ENSG00000185046

DESCRIPTION cajalin 2 isoform a [Source:RefSeq\_peptide;Acc:NP\_690001]

CTGATTGGTCCTGGACTTTTTTTTTGGTAACTTTTAAATTAGCATTTCAATCTCACTGCTTGTTATTGGTCTCTTCAGAG  
TTTCTACTTCTTGGTTTAAT

In100 candidate2336 (in intron):

LOCUS ENSG00000185046

DESCRIPTION cajalin 2 isoform a [Source:RefSeq\_peptide;Acc:NP\_690001]

TCATATTTTTTAAATATTTGTTTAGATTTAGCCTCATATTAACCATTTCTCTTTATTTATCATTACTTCTTGCATCTCAGTT  
CCTTTTCTGAATTATATCCT

In100 candidate2337 (in intron):

LOCUS ENSG00000185046

DESCRIPTION cajalin 2 isoform a [Source:RefSeq\_peptide;Acc:NP\_690001]

TCATTGAAAAAACTTTCATAGTCTAACATTCTTTTTCTTTTCTCGTTATTGTCTTCATCTTCTTTCTCTTCTCTTCAGTC  
CTTCTCCATGTCTTTTTTCTT

In100 candidate2338 (in intron):

LOCUS ENSG00000185046

DESCRIPTION cajalin 2 isoform a [Source:RefSeq\_peptide;Acc:NP\_690001]

TGATTGTTTATTTGTAGTAATTCTTTATAAATTCTTCTGTAACCCCACAAGATATGGGTCCTTTCTCAGGTGTATGCACT  
CTAAATATTTTCTCCTACTC

In100 candidate2339 (in intron):

LOCUS ENSG00000185046

DESCRIPTION cajalin 2 isoform a [Source:RefSeq\_peptide;Acc:NP\_690001]

GAATGATCTTCCTTTCCCTCTTAACCTCTTTTATCCTTTAGCTCTAAGCGTACTTGTCACCTTTTTTTAGCTCTCAGTTC  
TTTTCTCAATCTCCAAGTAT

In100 candidate2340 (in intron):

LOCUS ENSG00000173200

DESCRIPTION Poly [ADP-ribose] polymerase 15 (EC 2.4.2.30) (PARP-15) (Baggrssive  
lymphoma protein 3). [Source:Uniprot/SWISSPROT;Acc:Q460N3]

ATTTCTAACTGGAAGTCTGCTGTCATTCTTATCTTTACCCTTCTGTGTGTAATTCTTTTTTCTTTAATTGCTGTTCAGAT  
TTTCTCCTTATCACTGGTTT

In100 candidate2341 (in intron):

LOCUS ENSG00000111647

DESCRIPTION

ATTTTTAATTTTAATTAGAGTGGTTAAGGATAACTCTTCGCTTTATTTTTCCCACTCATTATTTTATCCACTCAGTGTTT  
TTCAGAGTGTCTTTTTTGCTC

In100 candidate2342 (in intron):

LOCUS ENSG00000115380

DESCRIPTION EGF-containing fibulin-like extracellular matrix protein 1

precrsor (Fibulin-3) (FIBL-3) (Fibrillin-like protein) (Extracellular protein S-

5). [Source:Uniprot/SWISSPROT;Acc:Q12805]

CCTCTGCACTCCTGGACTCACTTGCTCAACATCATTTTTCTTTTACTAACATCTTACTGATTTTGCTGTGTTTCTCAGAT  
ATACCTTGTTACTCTGCTTC

In100 candidate2343 (in intron):

LOCUS ENSG00000048740

DESCRIPTION CUG triplet repeat, RNA binding protein 2 isoform 1

[Source:Refseq\_peptide;Acc:NP\_001020247]

AGATTTGTAACTGGAATTTCTGTACTTCCATCTCTTTTGTGACAGCTTCTCTTTGTTTCAGGTTCTCCATTTCCTGCA  
CATTTTTTAACACATTTGCAA

In100 candidate2344 (in intron):

LOCUS ENSG00000048740

DESCRIPTION CUG triplet repeat, RNA binding protein 2 isoform 1

[Source:Refseq\_peptide;Acc:NP\_001020247]

GTTGGTTTAAACAAGCGTCCAACCCTTTTGTCTTGTTGTTTTTGTCTTTCCTGCTCCCTGTCCCCTTGTTTCCCACAGGC  
TGTGCGTTTGTCACATTTTC

In100 candidate2345 (in intron):

LOCUS ENSG00000166153

DESCRIPTION DEP domain containing 4 [Source:RefSeq\_peptide;Acc:NP\_689530]

CCATTTCTCCCTAACTCTACCTTCTCTGTTCTAATTCCGATCTCTTATTCAGATATTGGACCTTCTTAACTAGTCCTCTA  
ATTTGTATATATTTTTCTCT

In100 candidate2346 (in intron):

LOCUS ENSG00000173210

DESCRIPTION Actin-binding LIM protein 3 (Actin-binding LIM protein family  
mmber 3) (abLIM-3). [Source:Uniprot/SWISSPROT;Acc:O94929]

ATTCTTTATGTAAAGTTTATTGCTAGCTACCAACTAACTTTTTTTAGCCTCTTTTATTTACAGATATACTACCAACTCCTA  
AATTCTGATTTTTTTCATTT

In100 candidate2347 (in intron):

LOCUS ENSG00000055813

DESCRIPTION Coiled-coil domain-containing protein 85A.

[Source:Uniprot/SWISPROT;Acc:Q96PX6]

TGTTTCTTTCTGTACCTCCTCTTTAAAGCCAATAACTCTTAGGTTTGCCCTTTTGAAGCTATTTTCCAGATGTTGTAGGA  
GTGCTTCATTTTTTTTCTTT

In100 candidate2348 (in intron):

LOCUS ENSG00000012504

DESCRIPTION Bile acid receptor (Farnesoid X-activated receptor) (Farnesol  
rceptor HRR-1) (Retinoid X receptor-interacting protein 14)  
(RXRinteractingprotein

14). [Source:Uniprot/SWISSPROT;Acc:Q96RI1]

AGTCCATGACTTTCTTAACCTTGACATCTCTAACTTTTCCTTCAGCCTCTGTTTTCATATTTTCATGAGTTACCAAAACCT  
GATGTTCTCTCTGTTTCCTC

In100 candidate2349 (in intron):

LOCUS ENSG00000119866

DESCRIPTION B-cell lymphoma/leukemia 11A (B-cell CLL/lymphoma 11A) (COUP-TF interacting protein 1) (Ecotropic viral integration site 9 protein homolog (EVI-9)). [Source:Uniprot/SWISSPROT;Acc:Q9H165]

AGACTGATTAAGTGTAAAGACTTGTACATTTTCTGCTTCAGTTTTATTAAGTGGCAGCATCCTGGATGTTTTGTATTTT  
GTGATTTTTTTTTTTTTTTTTT

In100 candidate2350 (in intron):

LOCUS ENSG00000145882

DESCRIPTION prenylcysteine oxidase 1 like  
[Source:RefSeq\_peptide;Acc:NP\_07633]

CTCCCTTCCCATTTCTATAACTCTGCTGTTTATAGCACTTCTTCCTTATATTCTCCAGATGTCACCCAAAGCTTATTTCTT  
TACCTCTCTTTCTGATATTT

In100 candidate2351 (in intron):

LOCUS ENSG00000101333

DESCRIPTION 1-phosphatidylinositol-4,5-bisphosphate phosphodiesterase beta  
(EC 3.1.4.11) (Phosphoinositide phospholipase C) (Phospholipase C- beta-  
4) (PLCbeta-  
4). [Source:Uniprot/SWISSPROT;Acc:Q15147]

GAGCTCTGCCTGACACTTGCCCTTCTAACTTTTTCTGGAGTAATTCTCTCCCTCATTTTTTCAGCTTTGCTTTTTTGTTTTA  
AGTTTGTCTAATATGCGTCT

In100 candidate2352 (in intron):

LOCUS ENSG00000173175

DESCRIPTION Adenylate cyclase type 5 (EC 4.6.1.1) (Adenylate cyclase type V (ATP pyrophosphate-lyase 5) (Adenylyl cyclase 5).

[Source:Uniprot/SWISSPRO;Acc:O95622]

TTGCTTGAACCTAGCATGCCTCCCAACAAAATTCCTCATCATCCCTAACTTGACTTTATTTTCGTTATTATCAGTTCTCTCTTTGCCTAGGTGCCTGTGT

In100 candidate2353 (in intron):

LOCUS ENSG00000155886

DESCRIPTION Sodium/potassium/calcium exchanger 2 precursor (Na(+)/K(+)/Ca(2)-exchange protein 2) (Retinal cone Na-Ca+K exchanger) (Solute carrier family 24 member 2). [Source:Uniprot/SWISSPROT;Acc:Q9UI40]

TCTAATGGATTAACTGGGTACTCATCCTTTCCTACTGGTAATACATCTTGTTTGTTTTCCCCTTTCATCTAAATCCAGAAATGTTCTTCTCTTGTATCTG

In100 candidate2354 (in intron):

LOCUS ENSG00000148429

DESCRIPTION USP6 N-terminal-like protein (Related to the N-terminus of tre)(RN- tre). [Source:Uniprot/SWISSPROT;Acc:Q92738]

AACTTAGTCCTACTAGCAAAACACAACCTGAGTTAACTGTTGGGATTTTGTCCATTCTCACACTTTTTTCAGTATAATCCTTTCTTTTCCCCTTTTTGTA

In100 candidate2355 (in intron):

LOCUS ENSG00000171843

DESCRIPTION Protein AF-9 (ALL1 fused gene from chromosome 9 protein)

(Myelod/lymphoid or mixed-lineage leukemia translocated to chromosome 3 protein)  
YEATS domain-containing protein 3). [Source:Uniprot/SWISSPROT;Acc:P42568]  
TTCCAATAACTCAAGTATTTATTTTTCCTTCTTTGCTTCTTACCTTTCCTCTTAAGCTTATTCTTAATGCAGAT  
GTTACTTGGACCTTTTTTGT

In100 candidate2356 (in intron):

LOCUS ENSG00000171843

DESCRIPTION Protein AF-9 (ALL1 fused gene from chromosome 9 protein)  
(Myelod/lymphoid or mixed-lineage leukemia translocated to chromosome 3 protein)  
YEATS domain-containing protein 3). [Source:Uniprot/SWISSPROT;Acc:P42568]  
GATTCTTATCACATTAAGTCAATTGAGGTTGGAGATTTGAGTTGTTCTTCCTATCTCCTGTCTCTTTCCTTTCTCAGGT  
TCTTCTCTACAAAAGTTTCT

In100 candidate2357 (in intron):

LOCUS ENSG00000171843

DESCRIPTION Protein AF-9 (ALL1 fused gene from chromosome 9 protein)  
(Myelod/lymphoid or mixed-lineage leukemia translocated to chromosome 3 protein)  
YEATS domain-containing protein 3). [Source:Uniprot/SWISSPROT;Acc:P42568]  
CTTTTAAATATCATAATTTTATATTTATTCCTATTGATGATAATAGTAACTAATATTTAGTCATCATTTATTCAGTGTTT  
TGTCCTAACTGCTTTGCGTT

In100 candidate2358 (in intron):



LOCUS ENSG00000101868

DESCRIPTION DNA polymerase alpha catalytic subunit (EC 2.7.7.7).

[Source:Unprot/SWISSPROT;Acc:P09884]

AGCCATTTATGCCACTTGACTTTTATCCTTCGTAGAATAACTAACATTTACCTGTATTTTCTACATTTATCAGAAGACCC  
CTTTCTCTTTTATTTTCATTT

In100 candidate2359 (in intron):

LOCUS ENSG00000101868

DESCRIPTION DNA polymerase alpha catalytic subunit (EC 2.7.7.7).

[Source:Unprot/SWISSPROT;Acc:P09884]

CCTTATTTTTCCTCAATTAGTAATTTTACTCCCATAACCTTCTCTTTGCTGCCATCCTTTTGTATTTCTCAGTTAATAGT  
ATTTTCTCTAGTGCCCTTCC

In100 candidate2360 (in intron):

LOCUS ENSG00000188352

DESCRIPTION KIAA1797 (KIAA1797), mRNA [Source:RefSeq\_dna;Acc:NM\_017794]

TTCCCCCACCTACTCTTTAACTGAGTATTATGAATCTTATTCTTCTGTGATTTGTGTATCTCTATTCTCTGCTCAGTT  
TGCTATTTTATGATCTGCTT

In100 candidate2361 (in intron):

LOCUS ENSG00000188352

DESCRIPTION KIAA1797 (KIAA1797), mRNA [Source:RefSeq\_dna;Acc:NM\_017794]

AGCAATAACATTGCAAATAATTTGGATAATTTTTTTTTTTGTTAATTTTCAGGTCAAATACCTGACTTTCTCTTCCTTCCA  
TTATTTGATTTTCAGCATCTT

In100 candidate2362 (in intron):

LOCUS ENSG00000188352

DESCRIPTION KIAA1797 (KIAA1797), mRNA [Source:RefSeq\_dna;Acc:NM\_017794]  
TATAGTTTTTTTATCCTCATGCTGCATTAACCCCTTTATCATTATATCCTGACCTTATCCTTTTTACAGACTTTGTCTTG  
AAATGTTTTGTCATTGCTCC

In100 candidate2363 (in intron):

LOCUS ENSG00000188352

DESCRIPTION KIAA1797 (KIAA1797), mRNA [Source:RefSeq\_dna;Acc:NM\_017794]  
GCTATTTAACCTTCTGCTGACTTTGCCTTATTCTGGTTCCTCTTCTTTCAGCATCTGCTGATGTGGCCTCTGCTTCTCT  
TTGTTCCCTGTGCTTCTCCTT

In100 candidate2364 (in intron):

LOCUS ENSG00000113716

DESCRIPTION SMF protein (Fragment). [Source:Uniprot/SWISSPROT;Acc:Q12766]  
GACTCTGTCTCAAAAAAAAAAAAAAAAAAAGGAGGTGACATTTAACTATCCTTGTAGATTTGTCTGTTTCTTACAGTT  
CTCTTAATTTTTGTGTCGCA

In100 candidate2365 (in intron):

LOCUS ENSG00000151461

DESCRIPTION Regulator of nonsense transcripts 2 (Nonsense mRNA reducing factor  
2) (Up-frameshift suppressor 2 homolog) (hUpf2).  
[Source:Uniprot/SWISSPRT;Acc:Q9HAU5]

CATGTGAAAGGTGATAAAATTAGGTAACAAGATATGTAATGCCCTTTCTTAGCTAGCTGGTTTTCAACTTCTTCAGTCTT  
AATTCTAACCATTCTTCCTT

In100 candidate2366 (in intron):

LOCUS ENSG00000115464

DESCRIPTION Ubiquitin carboxyl-terminal hydrolase 34 (EC 3.1.2.15) (Ubiquitin  
thioesterase 34) (Ubiquitin-specific-processing protease 34) (Deubiquitinating  
enzyme 34). [Source:Uniprot/SWISSPROT;Acc:Q70CQ2]

AATTCCTTTTGTTAGGTCCATATGTATTCCTGGTAACTTGATCCTTTTTTTTCGTTTTAAATGTCCTTTGTCTCTTTCAGAC  
ATTTTTTGGCTTAGTCTATT

In100 candidate2367 (in intron):

LOCUS ENSG00000173163

DESCRIPTION COMM domain-containing protein 1 (Protein Murr1).  
[Source:Uniprt/SWISSPROT;Acc:Q8N668]

AGTAACATTTTTTCTCTTTTCTTATTTTTAGTAACTTTTATCTTCCTGACTTCCATAGCCAGCATCTTATTTTCTTCTTG  
GTGTCCTTTTTCCCTTATCA

In100 candidate2368 (in intron):

LOCUS ENSG00000173163

DESCRIPTION COMM domain-containing protein 1 (Protein Murr1).  
[Source:Uniprt/SWISSPROT;Acc:Q8N668]

TATCTCCTGACATGAGCTATTTGTTAACATATTCACATAATCTCTCTTCTCTTTTTGAATTTCCATATACCACTACAGAG  
TTTATTTTTTCACTAATCAC

In100 candidate2369 (in intron):

LOCUS ENSG00000173163

DESCRIPTION COMM domain-containing protein 1 (Protein Murr1).

[Source:Uniprt/SWISSPROT;Acc:Q8N668]

CTTATATGTGTTTGCTAATCTTAAATGGCCATCACTTCTAACATTCTTGGTTTTTAACATTCTCTGTGTTCTACTCAGGG  
TAGCTTTATTTTCTGCTCTT

In100 candidate2370 (in intron):

LOCUS ENSG00000136048

DESCRIPTION damage-regulated autophagy modulator

[Source:RefSeq\_peptide;AccNP\_060840]

AGATAATTTGTGTCATATGGTCCTGTTTCATTAACCTTGTTAGTTTCCTCCTCTTTAATTGTTAACTGATTCTGCCAGCA  
CCTCATTGTTTCATTGACTTT

In100 candidate2371 (in intron):

LOCUS ENSG00000169306

DESCRIPTION X-linked interleukin-1 receptor accessory protein-like 1 precursor  
(IL1RAPL-1) (Oligophrenin-4) (Three immunoglobulin domain-containing ILreceptor-  
related 2) (TIGIRR-2). [Source:Uniprot/SWISSPROT;Acc:Q9NZN1]

TAGCTCCAATTGATGGCTAATTGGCCCTTCAAATTTAACATACTTAAAAGGAAATTTCTGTTTATCCTCTACTCTCAGAA  
TTGATTCTTCTTCAACTTCT

In100 candidate2372 (in intron):

LOCUS ENSG00000169306

DESCRIPTION X-linked interleukin-1 receptor accessory protein-like 1 precursor (IL1RAPL-1) (Oligophrenin-4) (Three immunoglobulin domain-containing ILreceptor-related 2) (TIGIRR-2). [Source:Uniprot/SWISSPROT;Acc:Q9NZN1]

GAGAAAGAGAGAACGAGAACACACCCTAAAAGGTTTTCTTATTAACTATTCTCAAGTATTATTTCTTATCAGCTATCATCAGCTATTTCTTCTTCAGCAT

In100 candidate2373 (in intron):

LOCUS ENSG00000169306

DESCRIPTION X-linked interleukin-1 receptor accessory protein-like 1 precursor (IL1RAPL-1) (Oligophrenin-4) (Three immunoglobulin domain-containing ILreceptor-related 2) (TIGIRR-2). [Source:Uniprot/SWISSPROT;Acc:Q9NZN1]

AGAATTCAAGAACTTATTTATCATATAACCGAAAGTTTGTACCCTTTGATATTTCACTGTCTTTTTTCAGCATGTTTTTAATATGTTTGTACCTTTTTTTT

In100 candidate2374 (in intron):

LOCUS ENSG00000169306

DESCRIPTION X-linked interleukin-1 receptor accessory protein-like 1 precursor (IL1RAPL-1) (Oligophrenin-4) (Three immunoglobulin domain-containing ILreceptor-related 2) (TIGIRR-2). [Source:Uniprot/SWISSPROT;Acc:Q9NZN1]

CTTTCCTTTAATCTTTGAGGTTGTTTCTGTAGGTGGCTTATCTAACTTTACATTGAAATTTGCATTCATTTTCAGGATAATACTTCCCCTGGGTTTCTTCT

In100 candidate2375 (in intron):

LOCUS ENSG00000169306

DESCRIPTION X-linked interleukin-1 receptor accessory protein-like 1 precursor

(IL1RAPL-1) (Oligophrenin-4) (Three immunoglobulin domain-containing ILreceptor-related 2) (TIGIRR-2). [Source:Uniprot/SWISSPROT;Acc:Q9NZN1]

TTATAGTATCTTGTTTACACCCATTAACTGATAGCACTCTATGTTACTTTATTTTCAATTTTTTCCTTCAGAGTCT  
CAGTTATTTAACCATTTTCC

In100 candidate2376 (in intron):

LOCUS ENSG00000169306

DESCRIPTION X-linked interleukin-1 receptor accessory protein-like 1 precursor  
(IL1RAPL-1) (Oligophrenin-4) (Three immunoglobulin domain-containing ILreceptor-related 2) (TIGIRR-2). [Source:Uniprot/SWISSPROT;Acc:Q9NZN1]

ACTTTCATGCTATCATTTTATGGCTGAATGAAAATGCCATTTTAACTTGAAAAAATCTTTACTTGTTCTAGCAGCT  
TTCTTAGTTATGTTTTCTTT

In100 candidate2377 (in intron):

LOCUS ENSG00000169306

DESCRIPTION X-linked interleukin-1 receptor accessory protein-like 1 precursor  
(IL1RAPL-1) (Oligophrenin-4) (Three immunoglobulin domain-containing ILreceptor-related 2) (TIGIRR-2). [Source:Uniprot/SWISSPROT;Acc:Q9NZN1]

TTTGTTTATTAAAATGCAAGAATGGCCTCATACCTGTGGTTTAACTGAGCACTTAATTCCTTTATTATTTTAGTGCAGAT  
GTCTCCATTTTTTTCCTTTG

In100 candidate2378 (in intron):

LOCUS ENSG00000169306

DESCRIPTION X-linked interleukin-1 receptor accessory protein-like 1 precursor (IL1RAPL-1) (Oligophrenin-4) (Three immunoglobulin domain-containing ILreceptor-related 2) (TIGIRR-2). [Source:Uniprot/SWISSPROT;Acc:Q9NZN1]

TGTGTATACTCATGTACATAAACACACTACACATTCCTAGTTTAACTATTTGCTAACCCCTGTCCATTGATTTTCACAGTA  
TATTTTTTTTCTCCTCTCAAT

In100 candidate2379 (in intron):

LOCUS ENSG00000120860

DESCRIPTION Coiled-coil domain-containing protein 53.

[Source:Uniprot/SWISSROT;Acc:Q9Y3C0]

CATCAAGTCCTGGGGGTTTTGTTTAGTGGGAGACTTAACTACTGATTTGATCTCTCTACTTATTATTGGTCTGTTCAGAT  
TACCTATTTCTTTATGATTT

In100 candidate2380 (in intron):

LOCUS ENSG00000181192

DESCRIPTION dehydrogenase E1 and transketolase domain containing protein 1

Source:RefSeq\_peptide;Acc:NP\_061176]

CTAACGTAAAGGTATTCATTTTTCTCTTACAGTAATTCTTTCATTTCTGCAGTAATAGAAAGTTTTGCTTTTTGTTTTGT  
TTTGTTTTGTTTTGTTTTCT

In100 candidate2381 (in intron):

LOCUS ENSG00000101349

DESCRIPTION Serine/threonine-protein kinase PAK 7 (EC 2.7.11.1) (p21-activaed kinase 7) (PAK-7) (PAK-5). [Source:Uniprot/SWISSPROT;Acc:Q9P286]

TCATACTGTAGATTGTCTCTTAACTTTGTCGATTGTTTCCTTTGCTGTTTCAGAAGTTTTTTAGCTTGATGTAATCCCAT

TGTCTACTTTTGGTTTTTTT

In100 candidate2382 (in intron):

LOCUS ENSG00000017427

DESCRIPTION Insulin-like growth factor IA precursor (IGF-IA) (Somatomedin C (Mechano growth factor) (MGF). [Source:Uniprot/SWISSPROT;Acc:P01343]

GTATATGAAACTGTGACTCACTTGATATAACTTTAGAGTGTATGTTTTGACACCTGCTTATTTTCTTACCAGTAGCCTTT  
CTGGTTTTCCAAAATCTTTC

In100 candidate2383 (in intron):

LOCUS ENSG000000160145

DESCRIPTION Huntingtin-associated protein-interacting protein (Protein Duo)  
[Source:Uniprot/SWISSPROT;Acc:O60229]

AGTCCCATGTTGGATTAAACAATTTGCAAATATTTTCTTCCATTCTACAGGTTGTCTCTTCACTCTGTTGATTGTTTCCCT  
TGCTGTGCAGAAGCTTTTTTA

In100 candidate2384 (in intron):

LOCUS ENSG000000160145

DESCRIPTION Huntingtin-associated protein-interacting protein (Protein Duo)  
[Source:Uniprot/SWISSPROT;Acc:O60229]

AGGAGAAGCTAGGAGTCCCGGCTCCAACTCAAGCTTAACCATCAACTGTATCACCTTGTGTTTAAGTCATTTTCCAGTC  
TGATCTCAGTTTCTTTTGAT



In100 candidate2385 (in intron):

LOCUS ENSG00000160145

DESCRIPTION Huntingtin-associated protein-interacting protein (Protein Duo)

[Source:Uniprot/SWISSPROT;Acc:O60229]

AACATTTTAACTTCTGAGAGCTCTTCTCACTCTACAACCTTTTCCCTTTATGTAAACAGCTTGTTCTTTTTTCATGGAT

ACAATATCCTCTCTTATCTT

In100 candidate2386 (in intron):

LOCUS ENSG00000160145

DESCRIPTION Huntingtin-associated protein-interacting protein (Protein Duo)

[Source:Uniprot/SWISSPROT;Acc:O60229]

AGTTTTTATAATTAACATTGTATCCTGCTTTTTTCCACTGAATGTTATCTAAGCATTTTCCTTCAGTTTTACAAATTTA

TAATCTCTCTTTTTTAATTT

In100 candidate2387 (in intron):

LOCUS ENSG00000143951

DESCRIPTION

AGTTAACATTACTGAGTACCCCTTGTTCTTGAAATTTTTTTTTTTTTTTGGTTCTTTCAGTGTTCTCTCTATTTCTTTTT

CAGGTCCGTGTTTCCTTTCCC

In100 candidate2388 (in intron):

LOCUS ENSG00000143951

DESCRIPTION

TATGGTCATTTTAACTATGTTAATTCTTTAATCCATGAGCATGGTATTTTCTTTTCACTTGTTTGTGTCCTCTTCAGTT

TCTTTCGTCAGTGTTTTACA

In100 candidate2389 (in intron):

LOCUS ENSG00000143951

DESCRIPTION

AGTGGAAAAATCTATTCATTATTTTATTCTAACTTGGTAATATCTAATTATGTTTTTTAGCTCTTCTCACAGACAGTTTT  
ATCATCTTATCATTTTTTGGC

In100 candidate2390 (in intron):

LOCUS ENSG00000143951

DESCRIPTION

GTTGTGTTTCTGATTGTTTTAAAATTTTATAGCTGTATCTCATTTTGCTTTAACATTTTATTTTGAATCCTCTTTCAGGC  
ATTTTACAGATTTCTTTTTC

In100 candidate2391 (in intron):

LOCUS ENSG00000143952

DESCRIPTION Vacuolar protein sorting-associated protein 54 (Tumor antigen SP-8p) (Hepatocellular carcinoma protein 8). [Source:Uniprot/SWISSPROT;Acc:QP1Q0]

ATGGAATTTTAATTGAAAGGCTATATTAGCTAACACAATAAATTGCTTTGCATTTGTCCCAGATATTTTATTTACATACT  
GGCTAATTTTATTTATTTTT

In100 candidate2392 (in intron):

LOCUS ENSG00000143952

DESCRIPTION Vacuolar protein sorting-associated protein 54 (Tumor antigen SP-8p) (Hepatocellular carcinoma protein 8). [Source:Uniprot/SWISSPROT;Acc:QP1Q0]  
ATGGTATAATATTAAAGTCTAGTTGCTGTATGACTAATGAATTTAACTTTCACTGAGATTTCTGCTATTCAGACAAGTTT  
GTTTATTTTCAGTTTGTCTCT

In100 candidate2393 (in intron):

LOCUS ENSG00000179088

DESCRIPTION Uncharacterized protein C12orf42.

[Source:Uniprot/SWISSPROT;AccQ96LP6]

TTTTCTCTCACTCTGTGGGTTTTCTCTTAACTCTGCTGATTATTTCTTTTGCTCTGCAGAAGCTTTTATGTTTAAGCCCC  
ATGTATTTATCTTTGTTTTT

In100 candidate2394 (in intron):

LOCUS ENSG00000179088

DESCRIPTION Uncharacterized protein C12orf42.

[Source:Uniprot/SWISSPROT;AccQ96LP6]

TATAACTGTGCTATTGTGTTGACATTCACTTCTTCATTTTATTTTGTCTGCACAGTCTTGATCTGCTAATTTTCATTTTTC  
CTGTTGCTAAACTGTATTTT

In100 candidate2395 (in intron):

LOCUS ENSG00000119844

DESCRIPTION Aftiphilin. [Source:Uniprot/SWISSPROT;Acc:Q6ULP2]

AATAAATGTTTCTCTCTCTTAACTTTAGCTTGAATTATCATATTGTCTTTTAACTTTGTGTGCTTTTATTCCCCCAGAT  
TTTTCTTATTGCCTTTAATA

In100 candidate2396 (in intron):

LOCUS ENSG00000179833

DESCRIPTION SERTA domain-containing protein 2 (Transcriptional regulator  
interacting with the PHD-bromodomain 2) (TRIP-Br2).

[Source:Uniprot/SWISSPROT;cc:Q14140]

AATAGTTGTCTAATAAAACCTAGAAAGGCCACCTTTGGTTTTAACTAAGATGTAATTTTATCTTTCACAGAATTGTTCTAA  
AACCTTATATTTCCCTGTTT

In100 candidate2397 (in intron):

LOCUS ENSG00000163848

DESCRIPTION Zinc finger protein 148 (Zinc finger DNA-binding protein 89)  
(Transcription factor ZBP-89). [Source:Uniprot/SWISSPROT;Acc:Q9UQR1]

TTTAATGTTATTGATTCTTCTAGTTCATTAACATGGAACCTTTTTTCGTTTGTTTATGTCATCTGTGATTTTCCTTCAGCA  
GTGTTTTTTAGTTCTTCTTA

In100 candidate2398 (in intron):

LOCUS ENSG00000163848

DESCRIPTION Zinc finger protein 148 (Zinc finger DNA-binding protein 89)  
(Transcription factor ZBP-89). [Source:Uniprot/SWISSPROT;Acc:Q9UQR1]

GCTTCTGGTTTTTCATGTCTTCTAATTGTTCTCACTGTAACCTTTAAATAATATTCTTATACCTCAGTTTCTTAGGTTACCA  
ATTTGTTATCATTTTACTTC

In100 candidate2399 (in intron):

LOCUS ENSG00000111696

DESCRIPTION 5'-nucleotidase domain containing 3 isoform 2

[Source:RefSeq\_petide;Acc:NP\_057659]

CTTTTCTGTTTTTTTTTTTTTTGTAACCTCTAAAATTCTCCGGGAAATTTTTCACCTCTTCCATTTCTTCTTCAGGGACT  
CCTGATCTGTATATTCTTTT

In100 candidate2400 (in intron):

LOCUS ENSG00000198947

DESCRIPTION Dystrophin. [Source:Uniprot/SWISSPROT;Acc:P11532]

TGTATCTATTTTATAGCATTAATAAAATGGATGAAGCTTTAACTCTATAATAAATTTCTCCACTTTAAATTTCTATACAGCT  
TGTCTTTCCCTGATTCTCTA

In100 candidate2401 (in intron):

LOCUS ENSG00000198947

DESCRIPTION Dystrophin. [Source:Uniprot/SWISSPROT;Acc:P11532]

TTTCTAACTTAGCAATCTTGTTCTAGCTTCTTTTTCTTCTGTGACTATGTGTGTTTCAGTCCCTTGAATTCCCCTTTGAA  
TCAGTTTAAATTTGTTGCCT

In100 candidate2402 (in intron):

LOCUS ENSG00000198947

DESCRIPTION Dystrophin. [Source:Uniprot/SWISSPROT;Acc:P11532]

TGATTCTTCTCTCTTTTCTTCCTTATTAGTCTAACTAGAAAGTCTACCTTTTTTATTTTATTTTTCCTTTTCCAAAAACCAGCT  
CCTGGATTCATTTAGTTTTT

In100 candidate2403 (in intron):

LOCUS ENSG00000198947

DESCRIPTION Dystrophin. [Source:Uniprot/SWISSPROT;Acc:P11532]

TTAGCATAACATACTATGTTTTATTTTCTTTCAGCGTTTATCGTGATTGTTAAATCTTTTATTTGCTTTTAAAAATT  
TCCCCGTCTATTCCCATTCT

In100 candidate2404 (in intron):

LOCUS ENSG00000198947

DESCRIPTION Dystrophin. [Source:Uniprot/SWISSPROT;Acc:P11532]

CCCTCTCATCTGCTCATTCTGTACTCCAACACTAACTTTGTTTTTTTTTTTTTTAGATTTCTCTAACTACAGTG  
CTGTAATCTCTTTTTCCTTT

In100 candidate2405 (in intron):

LOCUS ENSG00000198947

DESCRIPTION Dystrophin. [Source:Uniprot/SWISSPROT;Acc:P11532]

ATTACTAACTGTCTGGATTTTTTCTTGTTTATTGGCTGTTTACATTTTGTCAATTTCTTTTATGTTCTTTATCCAGTT  
TTCCAGTAGATTTTTCCTTT

In100 candidate2406 (in intron):

LOCUS ENSG00000198947

DESCRIPTION Dystrophin. [Source:Uniprot/SWISSPROT;Acc:P11532]

TATGTAAACATGGTGGCACCCCTTTTCATATAATTCTCTCCTCACTTCTATTTTGGGTTTTTACATGTTCTTGTTTCAGTC  
TCTTCTGCTCTTTCTATCTT

In100 candidate2407 (in intron):

LOCUS ENSG00000198947

DESCRIPTION Dystrophin. [Source:Uniprot/SWISSPROT;Acc:P11532]

ACCACAAGCTGACTTGGGGGAGGAATATTTCTCATTAGCTGTAGTTTAACTTTTGTTTTCACTGCATATTTTCAGTC  
TATTTTATTTTCTTTCCTCT

In100 candidate2408 (in intron):

LOCUS ENSG00000198947

DESCRIPTION Dystrophin. [Source:Uniprot/SWISSPROT;Acc:P11532]

TTATTTATGTGCCAATAACTCCCCTCTGTTTTTAGCTTTTGTATCTGTTACATCTCAGATACTTTATTCTCTATTTGTAA  
AACAACCACATTCCTCCTTT

In100 candidate2409 (in intron):

LOCUS ENSG00000198947

DESCRIPTION Dystrophin. [Source:Uniprot/SWISSPROT;Acc:P11532]

CTTTCCTTTGATGTGAGAACTTTTAAATACTGATGCAATCTCCTTAACTCTTTCCTTAGCTGTTACTGGTCTTTTCAGAT  
TTCCAATTTTCATTATTCAG

In100 candidate2410 (in intron):

LOCUS ENSG00000183049

DESCRIPTION Calcium/calmodulin-dependent protein kinase type 1D (EC 2.7.11.7)  
(CaM kinase ID) (CaM kinase I delta) (CaMKI-delta) (CaM-KI delta) (CaMKIdelta)  
(Camk1D) (CamKI-like protein kinase) (CKLiK).

[Source:Uniprot/SWISSPOT;Acc:Q8IU85]

TCGTTTGGAAATTTCTTCGGGAAAAAAATCTAGTTAACTCTCTTTGATTTTCTTTTATAGATCCGTTATGTTTCCCAGTT  
TGATTCTGTTACCTTCCCAT

In100 candidate2411 (in intron):

LOCUS ENSG00000183049

DESCRIPTION Calcium/calmodulin-dependent protein kinase type 1D (EC 2.7.11.7)  
(CaM kinase ID) (CaM kinase I delta) (CaMKI-delta) (CaM-KI delta) (CaMKIdelta)  
(Camk1D) (CamKI-like protein kinase) (CKLiK).

[Source:Uniprot/SWISSPOT;Acc:Q8IU85]

AGAAATAACCACTGTGAGATTTTTTATGTATTTCCAGACCTTTTCTGTGCATAGTCAACACAATTGCTTTTGTATTGTG  
TGTGTTTCTTCCCTTTTCC

In100 candidate2412 (in intron):

LOCUS ENSG00000143995

DESCRIPTION Homeobox protein Meis1. [Source:Uniprot/SWISSPROT;Acc:000470]

TAATCATGCTTAATGAACTGAACTAAGCATAATTCCTTGTTCTGTTTTTGTAACCTTGTGGATTCTTCTAATGCTCAGTT  
TCATGTGACTACTCATTCTT

In100 candidate2413 (in intron):

LOCUS ENSG00000198431

DESCRIPTION Thioredoxin reductase 1, cytoplasmic precursor (EC 1.8.1.9) (TR  
(TR1). [Source:Uniprot/SWISSPROT;Acc:Q16881]

TCTTTTATCCATTTTGAGGGGAGTTATAATTTAGAATCCTCACTCTTAACCACTGTGTTGGAGTTCTTCCATTCTCAGAT  
TTCTTAGAGTTTTCTTATTT



In100 candidate2414 (in intron):

LOCUS ENSG00000198431

DESCRIPTION Thioredoxin reductase 1, cytoplasmic precursor (EC 1.8.1.9) (TR  
(TR1). [Source:Uniprot/SWISSPROT;Acc:Q16881]

ATTAGGAAAATATCAAAAAGGAAATTTTAATTCATGAAGAGATAACTGCTATTAATATTTTTGTGTATTCCTTCCAGTT  
TCTTTTTTCTCTAAATATTTT

In100 candidate2415 (in intron):

LOCUS ENSG00000114544

DESCRIPTION solute carrier family 41, member 3 isoform 4  
[Source:RefSeq\_peptide;Acc:NP\_001008487]

TTAGAGTTTATTTTTGTACATGGTGTAAACATAAGCATCCAACCTTCATTCTTTTGCATGTGGATATTTTCGTTTTCCCAGCT  
CCATTTTTTTTGAAGACTCTC

In100 candidate2416 (in intron):

LOCUS ENSG00000099810

DESCRIPTION S-methyl-5-thioadenosine phosphorylase (EC 2.4.2.28) (5'-  
methythioadenosine phosphorylase) (MTA phosphorylase) (MTAPase).  
[Source:Uniprot/SWISSPROT;Acc:Q13126]

TGACTTGCATTTCCCTGATAATTAACAATATTGAGCATTTTTTCATGTTTGTTGGCCATTTGTATATCTTGTTTTTCAGAA  
TTTTCTATTCATATCCTTAG

In100 candidate2417 (in intron):

LOCUS ENSG00000196740

DESCRIPTION Uncharacterized protein C20orf61 (Fragment).  
[Source:Uniprot/SPREMBL;Acc:Q9NU29]

TTCTTAATGTTTTAAAGAAGTTAACTTCTGTTTGTTTTTCATCATTCTGGTCTCAGTTCAGACATCATTTG TTCAGAGTGG  
CCTGTCTTCTCTTTCCTTTC

In100 candidate2418 (in intron):

LOCUS ENSG00000143971

DESCRIPTION Ewing's tumor-associated antigen 1 (Ewing's tumour-associated  
atigen 16). [Source:Uniprot/SWISSPROT;Acc:Q9NY74]

CTGTGACCAACAAAGCTGTGGATTATCTCTCTTTAACCTGCGTCTCCTCTTTTTTTCCTTACCTACTAAGCTTCAGCTATA  
CCAGCTATCTTTTAGTTTTT

In100 candidate2419 (in exon):

LOCUS ENSG00000143971

DESCRIPTION Ewing's tumor-associated antigen 1 (Ewing's tumour-associated  
atigen 16). [Source:Uniprot/SWISSPROT;Acc:Q9NY74]

TTTCTAAGTTAGTAGAGACTGTTTTTG TAGTTTTACTTTCATTAAGTGTGCTTAAGGTTTTTATACACTTCCAGATTTT  
AATTAATACTTTCATATTTTC

In100 candidate2420 (in intron):

LOCUS ENSG00000144908

DESCRIPTION 10-formyltetrahydrofolate dehydrogenase (EC 1.5.1.6) (10-FTHFDH (Aldehyde dehydrogenase 1 family member L1)).

[Source:Uniprot/SWISSPROT;Acc:O75891]

CACACTTTTTTCTGCCTTTTCTGATCTTAAGTGGAGCATTTTATATGATTCCATTTTCTTTTCTCTCTTAGCATATCAGTT  
TTACTTTTTTGTTGTTGCTT

In100 candidate2421 (in intron):

LOCUS ENSG00000115953

DESCRIPTION Calcineurin subunit B isoform 1 (Protein phosphatase 2B regulatory subunit 1) (Protein phosphatase 3 regulatory subunit B alpha isoform 1).[Source:Uniprot/SWISSPROT;Acc:P63098]

TAACTCAAGCTTGATTGTTTAAAATTTATTCCTCATTTTTACCCTTCCAAGTAAGCCTTTTCTCCAGTAGCCCTCATCTT  
TTCTTCCCTTTCTGAATTTT

In100 candidate2422 (in intron):

LOCUS ENSG00000171310

DESCRIPTION Carbohydrate sulfotransferase 11 (EC 2.8.2.5) (Chondroitin 4-Osulfotransferase 1) (Chondroitin 4-sulfotransferase 1) (C4ST) (C4ST-1) (C4S1).

[Source:Uniprot/SWISSPROT;Acc:Q9NPF2]

AGTTAACATGAAGCCACTTCTTTCCTAAACCCTTTACGTTTTGTACCAGGTCCAGACCAGATCGTTTTCTTTAAAGGCCCA  
ATATTTTTCTCCTTTCTTTT

In100 candidate2423 (in intron):

LOCUS ENSG00000136052

DESCRIPTION solute carrier family 41, member 2

[Source:RefSeq\_peptide;Acc:N\_115524]

ATGGGATTCCAAGTTTGGATGGGCATTGCTGGCCTTCCTTTTAAGATGTAACGAAGGGAATCTTACTGTCATCTTCAGGG  
TTTTCTGTTTGTTCCTTA

In100 candidate2424 (in intron):

LOCUS ENSG00000113140

DESCRIPTION SPARC precursor (Secreted protein acidic and rich in cysteine)  
Osteonectin) (ON) (Basement-membrane protein 40) (BM-40).

[Source:Uniprot/TrEMBL;Acc:P09486]

AGGGTAACTTTTTGTTTTGTTTTGTTTTAGCTGCTATTTCACTTTGATCCTTCAACCTCAAACCTATCTCAGACAAGTCCT  
TCCTTGATGTTTTCTTTTCT

In100 candidate2425 (in intron):

LOCUS ENSG00000136051

DESCRIPTION KIAA1033 (KIAA1033), mRNA [Source:RefSeq\_dna;Acc:NM\_015275]

AGTTTTAACGTCTTATATTTAGTTTCTCTGGTTTCCTTGCTAGCTTCCTCAATTGCCATCTTTTTCAGTTGAAGTGTTT  
TTTTCCTTTCTTTTGGAGGC

In100 candidate2426 (in intron):

LOCUS ENSG00000089123

DESCRIPTION Threonine aspartase 1 (EC 3.4.25.-) (Taspase-1) [Contains:  
Threonine aspartase subunit alpha; Threonine aspartase subunit beta].

[Source:Uniprot/SWISSPROT;Acc:Q9H6P5]

AGACTGTAACCTTTTGGTATTTGCTTTTTTTTTTTTTTCCTTCCTCACTATAACTCTCTGGAGATAACATCCAGGTTGTGTT  
TATCAATAGCTTGTTTTTTT

In100 candidate2427 (in intron):

LOCUS ENSG00000089123

DESCRIPTION Threonine aspartase 1 (EC 3.4.25.-) (Taspase-1) [Contains:  
Threnine aspartase subunit alpha; Threonine aspartase subunit beta].  
[Source:Unprot/SWISSPROT;Acc:Q9H6P5]

AGACATGCCCGTGGTCACTTATTTCTCGTATAACTTCATTTATCTTTCATTTGAATTTCACTTCCAGCATTATCACTTTT  
GTTTTGTTTTGTTTTTGTTT

In100 candidate2428 (in intron):

LOCUS ENSG00000173046

DESCRIPTION

GAAATATTAAGTGTGACGTCTAATAATAACTTAGTTTGCTATTTTTATGTGCCAGCTTTGTGTTAAGTGTTTACATTGTC  
TTTTTACACATTGTCTTTTT

In100 candidate2429 (in intron):

LOCUS ENSG00000197763

DESCRIPTION Thioredoxin reductase 3 (Thioredoxin reductase TR2)  
(Fragment).[Source:Uniprot/SPTREMBL;Acc:Q86VQ6]

ACCATTATACACTGAAACATGAATAACTCATTTCAATTCTTGCTGCCTAGGTATTCTTTTTTTAATTTTTATTTTTCAGTG  
ATGACCTTTTTTCTCTGCCT

In100 candidate2430 (in intron):

LOCUS ENSG00000155511

DESCRIPTION Glutamate receptor 1 precursor (GluR-1) (GluR-A) (GluR-K1)

(Gluamate receptor ionotropic, AMPA 1) (AMPA-selective glutamate receptor 1).

[ource:Uniprot/SWISSPROT;Acc:P42261]

TTTATCTTGTCTATTGTACATTTATTTTCATTAACCTTCTACACTTTATTTACTTCTTCTTTTCTATGTTTAATTTGCAGGG  
CTTTTTCCTGACTTCTTAAA

In100 candidate2431 (in intron):

LOCUS ENSG00000155511

DESCRIPTION Glutamate receptor 1 precursor (GluR-1) (GluR-A) (GluR-K1)

(Gluamate receptor ionotropic, AMPA 1) (AMPA-selective glutamate receptor 1).

[ource:Uniprot/SWISSPROT;Acc:P42261]

TTTGTAAGCCTTGCATTTCTCTCTAAAGATAGACTTAACCACATCACTATTTTCTTGGCTTGTTTCAGATTTACTAAAT  
TTTAAATTTTTTTGACTTTT

In100 candidate2432 (in intron):

LOCUS ENSG00000169604

DESCRIPTION Anthrax toxin receptor 1 precursor (Tumor endothelial marker 8)

[Source:Uniprot/SWISSPROT;Acc:Q9H6X2]

AGAAATTTAGCACCCCTATTTATAACTGTAATTGGGCTGCCATTGTCCTTTTTATTACTACCTTTCTTTACAGTACTTTT  
GATTCTTTTTTTATTTAAATT

In100 candidate2433 (in intron):

LOCUS ENSG00000159685

DESCRIPTION Coiled-coil-helix-coiled-coil-helix domain-containing protein 6

[Source:Uniprot/SWISSPROT;Acc:Q9BRQ6]

CTTCTTAGAAATCTCCTTAGGGAAAATAGCAACCCGCTAACCCCTACAAGTGAGTCTGTCTTATGGTCTTCCCAGCACAT  
CTCTCTGTAATTATTTATCT

In100 candidate2434 (in intron):

LOCUS ENSG00000089048

DESCRIPTION ESF1 homolog (ABT1-associated protein).

[Source:Uniprot/SWISSPR;Acc:Q9H501]

GTGGCTGATGCTTGTTAATTCTTTTGGCATTCCAAATAACTAGATGACCATTTTATTTTTTTATTGTTACAGAACAGCTG  
AGTCCTTTTTTTCAATTTTCC

In100 candidate2435 (in intron):

LOCUS ENSG00000166046

DESCRIPTION t-complex 11 (mouse) like 2 [Source:RefSeq\_peptide;Acc:NP\_68998]

AGTTGCAAAGCTGGGTTTGGGCATGAGGCTGCCTAACTCTAAAAGGAAGTGTTTTTTCCTCAGTGCCTCACTGCCTTGTC  
CTTTCTTTTTTTAATTTTTC

In100 candidate2436 (in intron):

LOCUS ENSG00000111783

DESCRIPTION regulatory factor X4 isoform c

[Source:RefSeq\_peptide;Acc:NP\_99759]

TCTGAGGAAAGAAAAGAATTGCCTCTAATCCTACTATGTAGAGATAACCATTCTTGATGTTTTTGTGTTTCCTTCCAGTC  
TTTTTTCTTTCTAAGAATAC

In100 candidate2437 (in intron):

LOCUS ENSG00000111783

DESCRIPTION regulatory factor X4 isoform c

[Source:RefSeq\_peptide;Acc:NP\_99759]

AGAAGATAGTCTTGTCTTTGTCCTATATAGGTAACATGGGTTGTTTTTCTCTCTGGCTTTTTTCAGGATGTTTTTCGTTA  
TCTTTGATTTTCTATAGTTT

In100 candidate2438 (in intron):

LOCUS ENSG00000111783

DESCRIPTION regulatory factor X4 isoform c

[Source:RefSeq\_peptide;Acc:NP\_99759]

GGAGATAAATAAAGTGGGATGTTGCTGTAACTGCCTCTCTCCTCTTGTCTTTGGTGTCTCTCTGTCTCTCTCATCAGTC  
TTTCTGTATCTCCTTTTCAT

In100 candidate2439 (in intron):

LOCUS ENSG00000115977

DESCRIPTION AP2-associated protein kinase 1 (EC 2.7.11.1) (Adaptor-associated  
kinase 1). [Source:Uniprot/SWISSPROT;Acc:Q2M2I8]

GAAATTCTTCACCCTCTTCCCCACATAACACTCTCTGTCAAACCTTCTTGCTTTATTTTTCTCCACAGCGTTTATCACA  
ATCTAACGCACTTTTTTTTTT

In100 candidate2440 (in exon):



LOCUS ENSG00000087338

DESCRIPTION Germ cell-less protein-like 1.

[Source:Uniprot/SWISSPROT;Acc:Q9IK5]

GTTGGTGTATTGAAAGCTTTCCTTTAACATTTTCACCTGCTCATTGTGATTCCCTCTTTTAGTCTAATATCTTCCAGGT  
CATACTTGTTTTTAATCATT

In100 candidate2441 (in intron):

LOCUS ENSG00000096872

DESCRIPTION Intraflagellar transport 74 homolog (Coiled-coil domain-containng  
protein 2) (Capillary morphogenesis protein 1) (CMG-1).

[Source:Uniprot/WISSPROT;Acc:Q96LB3]

AAATAGAACGGCTCACTATTGTATCTTCTCATTTAACTGCTTCCTTTCAATTCCCTTACTTGTTACTATTTATTTTCAGCT  
ATTAACTTTTTTATCACTCT

In100 candidate2442 (in intron):

LOCUS ENSG00000101251

DESCRIPTION

TATTTGGTGAGTTGTAGAAGTTTTAAATATATTCTGGATATTAAGTTCTTATCTAATTTGCAAATATTTTCTCCCAGTC  
TGTGGGTTGTCTTTTCACTC

In100 candidate2443 (in intron):

LOCUS ENSG00000187715

DESCRIPTION kelch domain containing 6

[Source:RefSeq\_peptide;Acc:NP\_997218]EXON

GGAATTTTAACATTGATTCCATATTTTATTTATTCTACTCTTAGTCTTCTAATTTTTTCAGTTGACCTGGTAATGTTCT  
TTTTGTAGCACCTTTTCTCT

In100 candidate2444 (in intron):

LOCUS ENSG00000172264

DESCRIPTION C20orf133 protein. [Source:Uniprot/SPTREMBL;Acc:Q495E0]

GCAATGGCCCTTTGAATTTTATTCTTCTGCTTGCTAACTGAAAAAATAATTTTACCTGTTTTTTTTGTCTTCCAGGTTTT  
TCTAACAACTTAGTACTTCC

In100 candidate2445 (in intron):

LOCUS ENSG00000172264

DESCRIPTION C20orf133 protein. [Source:Uniprot/SPTREMBL;Acc:Q495E0]

TTAAGGTGAAACAATTTAACTTCTCCCATTTCTTTTTCTCTCACCTCTGTCTTTTAAATGATGTAGTTCGTGATTCAGAT  
TAAACTTTATTTTCAATTTT

In100 candidate2446 (in intron):

LOCUS ENSG00000172264

DESCRIPTION C20orf133 protein. [Source:Uniprot/SPTREMBL;Acc:Q495E0]

CTGATGTCTTTGCATTATTTATCTGTGTTCTCTTGTATCTGAGTTCCTTTAACATCATTATTTTGAATTCCTTTTCAGGA  
ATTCATAGATTTTTTTTTTC

In100 candidate2447 (in intron):

LOCUS ENSG00000172264

DESCRIPTION C20orf133 protein. [Source:Uniprot/SPTREMBL;Acc:Q495E0]

CAAAGTGAAATTAAGTGGTAGTTTAATACTTCATTGCCTTATGCCTTTTTAGCTGACCATTGACTGTTTCTCTCCAGTC  
TTGCTTTTTCATCTACAAGT

In100 candidate2448 (in intron):

LOCUS ENSG00000172264

DESCRIPTION C20orf133 protein. [Source:Uniprot/SPTREMBL;Acc:Q495E0]

CTGATTTTCTCTATTAACTTTCTATTTTAAATTCATTGATTTCTACTCTAATTTTATGTCTCTTTTTTCCAGGTTAT  
TTCAGATTTAATTTACTCTT

In100 candidate2449 (in intron):

LOCUS ENSG00000172264

DESCRIPTION C20orf133 protein. [Source:Uniprot/SPTREMBL;Acc:Q495E0]

AAATTAAGTCTGCTGGGTTTTTTTCTCTTTAAAAAGCCTGCTCTTCAGGTTTTTATTTGCAGACTGGTCTAGGCTTTTT  
GTTTGTTTGTTTGTTTGTTT

In100 candidate2450 (in intron):

LOCUS ENSG00000184434

DESCRIPTION Leucine-rich repeat-containing protein 19 precursor.

[Source:Unprot/SWISSPROT;Acc:Q9H756]

GTAGATCATATGCTAGGTAAAAATGCACGTAATTTTGTGAAATAACAAAAGAACTGATATTCCATCTTCTATTCCAGTT  
TTCTATTTTATATTAGCTCC

In100 candidate2451 (in intron):

LOCUS ENSG00000120156

DESCRIPTION Angiopoietin-1 receptor precursor (EC 2.7.10.1) (Tyrosine-protein  
kinase receptor TIE-2) (hTIE2) (Tyrosine-protein kinase receptor TEK) (p10 TEK)  
(Tunica interna endothelial cell kinase) (CD202b antigen).

[Source:Uiprot/SWISSPROT;Acc:Q02763]

GATCTTTTGTAAGGTTCCATTCCTGGTTCTTTGAATTGTTCACTGTGTATAACCATTCTGTTACTCTCTCTTGGTCAGTA  
CTTTATACTTTCAACTTCAT

In100 candidate2452 (in intron):

LOCUS ENSG00000170624

DESCRIPTION Delta-sarcoglycan (SG-delta) (35 kDa dystrophin-associated  
glycprotein) (35DAG). [Source:Uniprot/SWISSPROT;Acc:Q92629]

AGTGGTAACATCTCCCTTGTCGTTTCTGATTGTGTTTATTTGAATCTTCTCTTTTCTTCTTTGTCTGCCTAGCAGTCTAC  
CTATGTTATTAATTCTTTCA

In100 candidate2453 (in intron):

LOCUS ENSG00000116005

DESCRIPTION Prenylcysteine oxidase precursor (EC 1.8.3.5) (PCL1).

[Source:Uiprot/SWISSPROT;Acc:Q9UHG3]

AGTCTTATTTAGAATTCAACCCTCCTAACCCCATGTATTTCTAGTCTTCTTTTCAGACCATTTTCTCCTTTTTTTTTTTCT  
TTTGAGATGGAGTCTGTCTC

In100 candidate2454 (in intron):

LOCUS ENSG00000089177

DESCRIPTION Kinesin-like motor protein C20orf23 (Sorting nexin-23).

[SourceUniprot/SWISSPROT;Acc:Q96L93]

GAAAAAATATTTTTGTATTTAACTTTTAAAGATACTTCTTATGTACAGATATGTAATTCAAGTTACCAATTATCTACTT  
TTTCTTGACTTTTTATTTCT

In100 candidate2455 (in intron):

LOCUS ENSG00000120162

DESCRIPTION Mps one binder kinase activator-like 2B (Mob1 homolog 2b) (Protein  
Mob3B). [Source:Uniprot/SWISSPROT;Acc:Q86TA1]

GAGTAACTTAAGGTGAATGTTGTGGATTTTTCTTTTCCTTCTCTTCCTCCTCTCCATTCTTTTAGGCACAGAGCAT  
TCCTTTTAACATTGCCGTTT

In100 candidate2456 (in intron):

LOCUS ENSG00000120162

DESCRIPTION Mps one binder kinase activator-like 2B (Mob1 homolog 2b) (Protein  
Mob3B). [Source:Uniprot/SWISSPROT;Acc:Q86TA1]

AAATATGAGAAGGAAAAATGCATCCTGGCATATTTGCATGGGAAGCCTTAACAAGAGGCCCTTTTCATCTAGTCCAGCA  
GTCTTTCTCCTTCATTTGAG

In100 candidate2457 (in intron):

LOCUS ENSG00000120071

DESCRIPTION Uncharacterized protein KIAA1267.

[Source:Uniprot/SWISSPROT;Acc:Q7Z3B3]

TTGCTTTTCATTTTCTGGGTCCTGTGCTTATAAACTTCTATATAGTAACTACTTGTTAAAATAATATTTTTTTTCCAGAA  
ATTCTCTTAATTGTGCTCTT

In100 candidate2458 (in intron):

LOCUS ENSG00000120071

DESCRIPTION Uncharacterized protein KIAA1267.

[Source:Uniprot/SWISSPROT;AccQ7Z3B3]

TTAGATGCTTTTGTCACTGTGTTGTTTCCTTTAGTCCTGGGGCCTTTAACTAGTTTGCCTTCCCTTTTCTATCTTTCAGAG  
TTTTCCTTTGATTGCCTCTT

In100 candidate2459 (in intron):

LOCUS ENSG00000151474

DESCRIPTION FERM domain-containing protein 4A.

[Source:Uniprot/SWISSPROT;Ac:Q9P2Q2]

AACAACATATATCTGTTGCCTTTTTCGTGTAACACTCATTTTACATTCTTTTGCTACTCTCTTCTCCTTCTTTGCAGAA  
CTTTCACCTTCTTTGTAACT

In100 candidate2460 (in intron):

LOCUS ENSG00000176034

DESCRIPTION Uncharacterized protein CXorf59.

[Source:Uniprot/SWISSPROT;Acc:8N9S7]

TTTTGTGCTGTGAATAACTTTTCCCCACTGCTTCTATCTTCTTCTGTTTCCTGACATTACTTTTTGGCTTCAGCTTACGTT  
CTGGCTATGTTTATTGTCCT

In100 candidate2461 (in intron):

LOCUS ENSG00000174482

DESCRIPTION leucine rich repeat neuronal 6C

[Source:RefSeq\_peptide;Acc:NP\_69783]

CTAACATATGAACATGAAATATCTTTCTATCGTTTGGTGTCTCTTCAATTTCTTTCATCAGTGTTCATAGTTTTCATT  
ATTGAGCTATTTCACTTTTT

In100 candidate2462 (in intron):

LOCUS ENSG00000174482

DESCRIPTION leucine rich repeat neuronal 6C

[Source:RefSeq\_peptide;Acc:NP\_69783]

ATTTTATTTCTTCTAAAAGAAGTGTTTAAGTTTTTTTTTTTTTAATTTAACACTTTTGATACTGACACTTTTTCAGGA  
CTCAATCTTTCTTCAATTAT

In100 candidate2463 (in intron):

LOCUS ENSG00000174482

DESCRIPTION leucine rich repeat neuronal 6C

[Source:RefSeq\_peptide;Acc:NP\_69783]

CTTTTACGTTACATAGATGGCTGATTTCCATAAACTTCATGAACTAACATCTACTAGCCTCTAATTTTCTTATGCAGCT  
TCTTCACGTCTTTCATCCTT

In100 candidate2464 (in intron):

LOCUS ENSG00000174482

DESCRIPTION leucine rich repeat neuronal 6C

[Source:RefSeq\_peptide;Acc:NP\_69783]

CATTGGAATAAACATTTTTTTTTCTCTAAATAACACAAAGGAACCCTAGTTTTTGTCTCAGACTTCAATTACTTAGTATTTA  
CTTAGCACCTATTACTTTCT

In100 candidate2465 (in intron):

LOCUS ENSG00000130962

DESCRIPTION Transmembrane gamma-carboxyglutamic acid protein 1 precursor  
(Poline- rich Gla protein 1) (Proline-rich gamma-carboxyglutamic acid protein1).  
[Source:Uniprot/SWISSPROT;Acc:O14668]

CTTTCAAAGGTTGTTTGTGCCTAACCTTCTTCTGTTTTTCTGTTTGCATTCCTCATTTGCATTTTCAGTTCTTCACCTT  
TTAACTGAGGCTAGTTTTCT

In100 candidate2466 (in intron):

LOCUS ENSG00000130962

DESCRIPTION Transmembrane gamma-carboxyglutamic acid protein 1 precursor  
(Poline- rich Gla protein 1) (Proline-rich gamma-carboxyglutamic acid protein1).  
[Source:Uniprot/SWISSPROT;Acc:O14668]

CTACACTTACTACATCCTCTCTGATCTCAATAAGTAGTAACTCCATCCATCATGTTTGCTGATCTCCAGGCTTTTGGCCA  
TCTCTGACTCCTCTCTTTTT

In100 candidate2467 (in intron):

LOCUS ENSG00000130962

DESCRIPTION Transmembrane gamma-carboxyglutamic acid protein 1 precursor  
(Poline- rich Gla protein 1) (Proline-rich gamma-carboxyglutamic acid protein1).  
[Source:Uniprot/SWISSPROT;Acc:O14668]



ACTCTTCTAACTTGGTCCTCTCACTATTTCTTTATCTGCCTGATTTGAGGATCTCTCCCCTCTCTGACTTTGTCTCAGAT  
CATATATATTTTTTCTCTCC

In100 candidate2468 (in intron):

LOCUS ENSG00000073969

DESCRIPTION Vesicle-fusing ATPase (EC 3.6.4.6) (Vesicular-fusion protein NS)  
(N- ethylmaleimide sensitive fusion protein) (NEM-sensitive fusion protei).  
[Source:Uniprot/SWISSPROT;Acc:P46459]

CTTCTTTAAGCTGTCCATAATGGTGTAGTCGTGATTTCAAGCTAACTGTTCTTACTGCATTTTTCCCATGATTTTCAGAC  
CTGCTTTTGGTCCTCTGTTA

In100 candidate2469 (in intron):

LOCUS ENSG00000065809

DESCRIPTION Protein FAM107B. [Source:Uniprot/SWISSPROT;Acc:Q9H098]

GTGGTAACAAAGATCTGTTTTCTCCCTCAAGTTTTTATTTGTTTAACAGACTATCGTAACCTTTCTGTGGCTGTTTTAAG  
CTTCACAGTTTTTCCGCTTT

In100 candidate2470 (in intron):

LOCUS ENSG00000116035

DESCRIPTION Ventral anterior homeobox 2. [Source:Uniprot/SWISSPROT;Acc:Q9UI0]

AATGGAATCATATAGTGATAACTTTTGGGAACTGTTTTTTCCCCTCAGTATAATTTCTGTGTAAATTGTTGTGTGTTT  
CAATCGTTCTTCCTTTTTTTT

In100 candidate2471 (in intron):

LOCUS ENSG00000113282

DESCRIPTION Clathrin interactor 1 (Epsin-4) (Epsin-related protein) (EpsinR  
(Enthoprotin) (Clathrin-interacting protein localized in the trans- Golgi egion)

(Clint). [Source:Uniprot/SWISSPROT;Acc:Q14677]

GTAAATGAACATGGAATGCAAAGGGATGGTGTTAATTAACCTGGAAGGTACATACTTACTATTTGCTTTCAGATGACGGT  
TTTTATGTAGCTCTTTCTTC

In100 candidate2472 (in intron):

LOCUS ENSG00000108433

DESCRIPTION Golgi SNAP receptor complex member 2 (27 kDa Golgi SNARE protei)  
(Membrin). [Source:Uniprot/SWISSPROT;Acc:O14653]

ATTGTAGTCCCTTCTTTCAAAGCTCCCAAATAACGTGGGGCTGTGTCTAGGCTGTTTCTTTCCTCTTGGGCCAGCTGTA  
GGGTTTGCCTTTCCTTGTCT

In100 candidate2473 (in intron):

LOCUS ENSG00000164330

DESCRIPTION Transcription factor COE1 (OE-1) (O/E-1) (Early B-cell  
factor). [Source:Uniprot/SWISSPROT;Acc:Q9UH73]

AGGATGGATGAATTGCCTCGAGAGTTAAAGCAAAACCTCAAATCTCTCTAACCCAACCTTTTATTTTTTCTTCTTCAGTC  
TTTTTCTCTTTCATGACTAT

In100 candidate2474 (in intron):

LOCUS ENSG00000164330

DESCRIPTION Transcription factor COE1 (OE-1) (O/E-1) (Early B-cell factor). [Source:Uniprot/SWISSPROT;Acc:Q9UH73]

TTGTCAACCTAAGAAGCCCATTGTGGGTGTAGTGGCAATTGTTAATAACTTTTGGAAGAATTCTTAACTTTTTCAGCTACT  
CTGTTTAGTTCCTTAACATC

In100 candidate2475 (in intron):

LOCUS ENSG00000112685

DESCRIPTION Exocyst complex component 2 (Exocyst complex component Sec5).  
[Source:Uniprot/SWISSPROT;Acc:Q96KP1]

AGTAACCTAACAAACATTTTGCCTCTTTAAATGCTTCTGTGCAGTTGGTATTTTCATCCTCTATTTCTTATTTTATTACT  
GTTTTTGTACTTTCACTTTT

In100 candidate2476 (in intron):

LOCUS ENSG00000112685

DESCRIPTION Exocyst complex component 2 (Exocyst complex component Sec5).  
[Source:Uniprot/SWISSPROT;Acc:Q96KP1]

TAAATTTGCGTATAGTTCATTGCATTTTGAATTTGAGTGCTTTATTTGTAACTGTTTCCTACTTGCTTCTATGTTTCAGTC  
TCTCTGTTGATGTTTCTTCC

In100 candidate2477 (in intron):

LOCUS ENSG00000135083

DESCRIPTION cyclin J-like [Source:RefSeq\_peptide;Acc:NP\_078841]

TGTGTGTGTGCATGAATGTAGTTTAACTGGGATCGTACTCTAATCTTTTTTTGTTTTTATTCATCCCCTTAAAGACAGCT  
TATTCTTTCTCTTGTTTTTG

In100 candidate2478 (in intron):

LOCUS ENSG00000112699

DESCRIPTION GDP-mannose 4,6 dehydratase (EC 4.2.1.47) (GDP-D-mannose dehydratase) (GMD). [Source:Uniprot/SWISSPROT;Acc:O60547]

TTAATAGTTCCCATTCGCCTACTGAGAACACTTTAACCCCTGAACTGCTACTTCCCATGTTTCGATTTATTGCTTTCCAGTA  
ATTTCATTCTCTCTTGTTTG

In100 candidate2479 (in intron):

LOCUS ENSG00000112699

DESCRIPTION GDP-mannose 4,6 dehydratase (EC 4.2.1.47) (GDP-D-mannose dehydratase) (GMD). [Source:Uniprot/SWISSPROT;Acc:O60547]

TTTCCTTGCTACACTGTTTGTCTTTAACATTCATTTTTCTTTTTCTTCCCATTGTATTTTAAATCTCCTCAGTTGTGATT  
GGTTTTTGTTTTATTTACTT

In100 candidate2480 (in intron):

LOCUS ENSG00000137074

DESCRIPTION Aprataxin (Forkhead-associated domain histidine triad-like protein) (FHA-HIT). [Source:Uniprot/SWISSPROT;Acc:Q7Z2E3]

TTAGATAACTTACTAAACTGTAGACCTTATTTGAATTTACCCATTTTTCCTGTATTGTTCTTTTTCTACTCCAGAATCC  
AATCTCACATTTTCATTTATT

In100 candidate2481 (in intron):

LOCUS ENSG00000144036

DESCRIPTION Exocyst complex component Sec15B.

[Source:Uniprot/SWISSPROT;AccQ9Y2D4]

GTATTAACTTTTATAAATACATCTCCCCATTTTGTTGTCTATTTTTTCACCTAATTCATATTGCAAATTCTTATACAGAA  
ACTTAACTTTTTTTTTTTTTG

In100 candidate2482 (in intron):

LOCUS ENSG00000144036

DESCRIPTION Exocyst complex component Sec15B.

[Source:Uniprot/SWISSPROT;AccQ9Y2D4]

TCTTTGTTGGTTTAAAGTCTGTTTTGTCTGAAACTAGGTTTGTAACCCCTGCTTTTTTGTTTTCTATTGCTTGGCAGAT  
TTTTCTCCATCCCTTTATTT

In100 candidate2483 (in intron):

LOCUS ENSG00000144036

DESCRIPTION Exocyst complex component Sec15B.

[Source:Uniprot/SWISSPROT;AccQ9Y2D4]

TTACATTTGTCAAACTGAGAAATTAGTACTGGCACATCACTACTAACTAAAGTCTAGATTCATTTGTATTTACCAGTT  
TTTCTACTAATACTCTCTTT

In100 candidate2484 (in intron):

LOCUS ENSG00000144036

DESCRIPTION Exocyst complex component Sec15B.

[Source:Uniprot/SWISSPROT;AccQ9Y2D4]

AGGTCATGCTTTTGGTGTGTATCTAAAAGTTGTAAGTGAACCCAAGGTTACCTAGATTTTCTCTTGTTATTGTCCAGAA  
GTTTTATATTTTGTGTTTT

In100 candidate2485 (in intron):

LOCUS ENSG00000144036

DESCRIPTION Exocyst complex component Sec15B.

[Source:Uniprot/SWISSPROT;AccQ9Y2D4]

TGAGCACCTGGTGGCTCAATCAATTTGACACATAAAATTAACCATTACAAATGCTATACCCTTTCCTTTGTTTTGCAGTA  
TTTTTTTCTTGTGCCCCATG

In100 candidate2486 (in intron):

LOCUS ENSG00000144036

DESCRIPTION Exocyst complex component Sec15B.

[Source:Uniprot/SWISSPROT;AccQ9Y2D4]

GATATCTTGACAATATTGTCTTCCTATCCATGAATATGAAATAACTCATTTATTTGTTATTCTTTGATATTTTATCAGAG  
TTTCATAGTTTTTCTCATGT

In100 candidate2487 (in intron):

LOCUS ENSG00000172765

DESCRIPTION Transmembrane and coiled-coil domains protein 1.

[Source:Unipro/SWISSPROT;Acc:O94876]

AACAATTCTAAACAACTTTCCTTATTGCTTGGTTTGCTAACCATTCATGTGGTCTTTGGGGCTTTTATTTTACCAGTG  
TTCTCATTTTTTCACTGCTAC

In100 candidate2488 (in intron):

LOCUS ENSG00000172765

DESCRIPTION Transmembrane and coiled-coil domains protein 1.

[Source:Unipro/SWISSPROT;Acc:O94876]

AATTTTCTAATTAGAAGGTAAGTATATTATGGGTATTTTGCTGCCAGTACTTCTCTCCCAATTATTTTTTAACTTTACC  
CTCTTCACTCTATACTATGT

In100 candidate2489 (in intron):

LOCUS ENSG00000172765

DESCRIPTION Transmembrane and coiled-coil domains protein 1.

[Source:Unipro/SWISSPROT;Acc:O94876]

GGTATTAAGTACTCATCTCTGCTACCATCTTTTTTCTTCTGTTTTATTGTATTAACCTCCTAGCTAGTCTCCCAGCATCC  
GTTCTTGCTTAACACATTTT

In100 candidate2490 (in intron):

LOCUS ENSG00000172765

DESCRIPTION Transmembrane and coiled-coil domains protein 1.

[Source:Unipro/SWISSPROT;Acc:O94876]

TGGACTGTTCTGCATACTAGGCTGTAAACCTGAAATGCTTTTCCTTACCCTTTCTGTATCAGATACTAATTTCTTCAAGG  
CTCATTTTTATTGTTACCTC

In100 candidate2491 (in intron):

LOCUS ENSG00000145864

DESCRIPTION Gamma-aminobutyric-acid receptor subunit beta-2 precursor (GABAA)  
receptor subunit beta-2). [Source:Uniprot/SWISSPROT;Acc:P47870]

ATATTAGTCTTATTGATTTACTTAACTGTTTTTCATTTTATTGTATTTTACTCATATTTATTATTTCTTCTTTCCAGTT  
TGTGCTTAATTTGCATTTCT

In100 candidate2492 (in intron):

LOCUS ENSG00000145864

DESCRIPTION Gamma-aminobutyric-acid receptor subunit beta-2 precursor (GABAA)  
receptor subunit beta-2). [Source:Uniprot/SWISSPROT;Acc:P47870]

TTTCTGGAAAAAAAAAACAATAACAACAATCGCCTCTTGATCTTCTTTCACCAACTATTTTCTTTCCCATTATCAGTC  
TCATTTTCTTGCTGCTTCTA

In100 candidate2493 (in intron):

LOCUS ENSG00000145864

DESCRIPTION Gamma-aminobutyric-acid receptor subunit beta-2 precursor (GABAA)  
receptor subunit beta-2). [Source:Uniprot/SWISSPROT;Acc:P47870]

AGAATGATAGTATTCTTAACCTTGCAAAAATATTTAATTTCTATATATATTTTCTCTCTCTTACCAATCTTATCAGAT  
AAATCTTTTCCTTTCACAGT

In100 candidate2494 (in intron):

LOCUS ENSG00000206384

DESCRIPTION

ATGATATGTTGATGAAACCCTTAAATACTTTAACTTATAATTTAGTTTGTTTCTCAAATACTGCTATTTCACTTCCAGAT  
TTCAATTGTTTTGGCCCTTC

In100 candidate2495 (in intron):



LOCUS ENSG00000196455

DESCRIPTION Phosphoinositide 3-kinase regulatory subunit 4 (EC 2.7.11.1) (P3-kinase regulatory subunit 4) (PI3-kinase p150 subunit) (Phosphoinositide3-kinase adaptor protein). [Source:Uniprot/SWISSPROT;Acc:Q99570]

AGGAGTTAACTGAATTTTATAGATCTTAGTTTGACCTTTTCAGTTTTCAGTTTTCCTTTTTTTTTTTTTTATTTTTTGAGAC  
GGACGGAGTCTCGCTCTGTC

In100 candidate2496 (in intron):

LOCUS ENSG00000022355

DESCRIPTION Gamma-aminobutyric-acid receptor subunit alpha-1 precursor (GAB(A) receptor subunit alpha-1). [Source:Uniprot/SWISSPROT;Acc:P14867]

AGATATACTGCACTTTCTGTTTCTTAAACATAACACATTTAACACATTTATTTTCACCTCAGATCCTTGCCTCCTTCTT  
TTTTTTAATTTTTTTCCTCT

In100 candidate2497 (in intron):

LOCUS ENSG00000113327

DESCRIPTION Gamma-aminobutyric-acid receptor subunit gamma-2 precursor (GAB(A) receptor subunit gamma-2). [Source:Uniprot/SWISSPROT;Acc:P18507]

GTTTCATGAAACATCTTCATAATTATTTCTGGCATAACCATGTAAATTATTTTCTGTTTTTGTTGTTTTAATCCCAGTT  
TTTTCTTAGATTCCATGTTC

In100 candidate2498 (in intron):

LOCUS ENSG00000113327

DESCRIPTION Gamma-aminobutyric-acid receptor subunit gamma-2 precursor (GAB(A) receptor subunit gamma-2). [Source:Uniprot/SWISSPROT;Acc:P18507]

ACTACCTCTAAAATAATAATGATAATGATAATAATGACAATATGTGCTAACATTGTGAAGCACTTTCTATACATCAGCTC

ATTCATTTTTCACAGCCATT

In100 candidate2499 (in intron):

LOCUS ENSG00000139437

DESCRIPTION trichoplein [Source:RefSeq\_peptide;Acc:NP\_115676]

ACTATGGGATTAAAGCGTCAACCGTCCTGGCATTTATTAACATGTTACCTTTTCTGCATAATTCTCAGCTCGTCACTCA  
AGTTGTTATTACCTTCATT

In100 candidate2500 (in intron):

LOCUS ENSG00000116127

DESCRIPTION Alstrom syndrome protein 1. [Source:Uniprot/SWISSPROT;Acc:Q8TCU]

TTACATAACTTCTTTAAATTATTTCCCTTCTTGGGTTCTTCTGGTTTTTTTTCTACTCATCTGGCTGTTCTCTCTCAGTA  
TCCTTTGCTGCTTTATCTTC

In100 candidate2501 (in intron):

LOCUS ENSG00000116127

DESCRIPTION Alstrom syndrome protein 1. [Source:Uniprot/SWISSPROT;Acc:Q8TCU]

AGGATATATAACCAAGGTTTAGTTGGGTTTTCTTTTATTGTTTCCTTCATACTTCCTGAATTTCTACAATGATCAGGT  
TGTTTTGTTTGTTTGTTTGT

In100 candidate2502 (in intron):

LOCUS ENSG00000116127

DESCRIPTION Alstrom syndrome protein 1. [Source:Uniprot/SWISSPROT;Acc:Q8TCU]  
TTTTTAAGGAGAAAATAAAAATATATTTTTTTAACATCATTTTAGTCTCTAGTTTTATATCAGTGTTTTATATTTTACCAT  
CTAAATCATCTGTTATTTCT

In100 candidate2503 (in intron):

LOCUS ENSG00000139436

DESCRIPTION ARF GTPase-activating protein GIT2 (G protein-coupled receptor  
inase- interactor 2) (GRK-interacting protein 2) (Cool-interacting tyrosine  
phosphorylated protein 2) (CAT2) (CAT-2). [Source:Uniprot/SWISSPROT;Acc:Q1161]  
CCACCTGGTTGAAACTTTTTCTGTTATCTCTGTATTGGTGTGAATATAACGTTGCCATTTCTGTCATTTTTTTTCAGTC  
CTTGTTTCATTTTGTTTTTGT

In100 candidate2504 (in intron):

LOCUS ENSG00000141293

DESCRIPTION Src kinase-associated phosphoprotein 1 (Src family-associated  
posphoprotein 1) (Src kinase-associated phosphoprotein of 55 kDa) (pp55) (SKP-  
55). [Source:Uniprot/SWISSPROT;Acc:Q86WV1]  
GGTCAAATTTATTTATTTACTTTTATCACTTCTAACTTAAAATGTCCTTTCTTCTCTAGAGTTTTGTTCAACATTCAGTT  
CTTTTCTGGTTTTTCTATAA

In100 candidate2505 (in intron):

LOCUS ENSG00000141293

DESCRIPTION Src kinase-associated phosphoprotein 1 (Src family-associated  
posphoprotein 1) (Src kinase-associated phosphoprotein of 55 kDa) (pp55) (SKP-  
55). [Source:Uniprot/SWISSPROT;Acc:Q86WV1]  
AAAAACTTTAGCTTATGAAAAAGGAAAACACCATACTAAGAGTAAATTAACCACTTAAGTAACACTTTTAGTCTTCAGAC

TTTCTCAGCATTCTTCTTT

In100 candidate2506 (in intron):

LOCUS ENSG00000196353

DESCRIPTION Copine-4 (Copine IV) (Copine-8).

[Source:Uniprot/SWISSPROT;Acc:96A23]

TTTCTCCCACTGTGGGTTGCTTGTAACCTCTGCTGGTTATTTCTTTTACTGTGCAGAAGCTTTTGGTTTAATTAAGTCCC

ATCCATTTATCTTTATTTTT

In100 candidate2507 (in intron):

LOCUS ENSG00000196353

DESCRIPTION Copine-4 (Copine IV) (Copine-8).

[Source:Uniprot/SWISSPROT;Acc:96A23]

AGGTGCCCTGTCCTGAAGATACTCCTCTTACTGAATTCTAGTAACTGCTCCCTCCCACTCTTTCTGGTCAGTTTCCATTA

ACCTTTTCCACATGTTTGTG

In100 candidate2508 (in intron):

LOCUS ENSG00000145934

DESCRIPTION Teneurin-2 (Ten-2) (Tenascin-M2) (Ten-m2) (Protein Odd  
Oz/tenmhomolog

2). [Source:Uniprot/SWISSPROT;Acc:Q9NT68]

TCCTTGGGAGTAAATGTTGCAATGGGTTTAATTTCTAATGAAATAACTTAGCTTGGAATTCTAGTCCTGGTTTCTCAGCT

TCCTTAAACTACTTTTTACT

In100 candidate2509 (in intron):

LOCUS ENSG00000145934

DESCRIPTION Teneurin-2 (Ten-2) (Tenascin-M2) (Ten-m2) (Protein Odd  
Oz/tenmhomolog

2). [Source:Uniprot/SWISSPROT;Acc:Q9NT68]

TGTCTGGTCCTGGACTTTTCTTTTTCGGTAACTTTTAAATACCATTTTAATCTCACTTCTTGTTATTGGTCTGTTTCAGGG  
TATCTAATTCTTCCTGATTT

In100 candidate2510 (in intron):

LOCUS ENSG00000145934

DESCRIPTION Teneurin-2 (Ten-2) (Tenascin-M2) (Ten-m2) (Protein Odd  
Oz/tenmhomolog

2). [Source:Uniprot/SWISSPROT;Acc:Q9NT68]

AGAATTGCACCCACATCAATAAGAACTGAGTATTAGATCACATAACACTCTTTCTCCTGCTCTAATATGTCTCTCCAGGA  
ATTCTACTGTTTCTCTCCTT

In100 candidate2511 (in intron):

LOCUS ENSG00000145934

DESCRIPTION Teneurin-2 (Ten-2) (Tenascin-M2) (Ten-m2) (Protein Odd  
Oz/tenmhomolog

2). [Source:Uniprot/SWISSPROT;Acc:Q9NT68]

GTAAATGTTACATCTACCTAAGGATATTGTTAATGGAAGCAAAACCTAACCCCCCTTATTTGATTTTGCCCTTCAGACT  
TGAATTTTCTCCTAACGCT

In100 candidate2512 (in intron):

LOCUS ENSG00000145934

DESCRIPTION Teneurin-2 (Ten-2) (Tenascin-M2) (Ten-m2) (Protein Odd  
Oz/tenmhomolog

2). [Source:Uniprot/SWISSPROT;Acc:Q9NT68]

AGTTGATGTTGAAAACATATGGAATCTCCTTTTTTAAAAAGGTAACCTTTCATGATCCTCCTCTTAATGTTCTCAGTTTTTAT  
ACTCTTGTTTAGTTTTTATT

In100 candidate2513 (in intron):

LOCUS ENSG00000145934

DESCRIPTION Teneurin-2 (Ten-2) (Tenascin-M2) (Ten-m2) (Protein Odd  
Oz/tenmhomolog

2). [Source:Uniprot/SWISSPROT;Acc:Q9NT68]

TGTACGTGTCTGAGCTAATATTAAGTAGAAATTTGTCTACTACACTTCTTTTTTTTTTTTTTTTTTTTTTTTGGAGACAGAG  
TTTCTCTCTTATTTCCCAGG

In100 candidate2514 (in intron):

LOCUS ENSG00000145934

DESCRIPTION Teneurin-2 (Ten-2) (Tenascin-M2) (Ten-m2) (Protein Odd  
Oz/tenmhomolog

2). [Source:Uniprot/SWISSPROT;Acc:Q9NT68]

CACAATAAAGAAGAGAAACACACTAATCTGCTACATGAGGATAACCATTTGTCAACATTTTAAATTATTTTCCTTTCAGTC  
TTTTATTTTCTATGTGTATG

In100 candidate2515 (in intron):

LOCUS ENSG00000014257

DESCRIPTION Prostatic acid phosphatase precursor (EC 3.1.3.2).

[Source:Unipot/SWISSPROT;Acc:P15309]

TTAACTATTCTGTAAAATTATGTCCACCCTTCTGTCATCTCTTTTTTTTTTTAACTTCTCTTTTGAAAGCCATCAGTGTCT  
AATTCAGTGGCCTTTCTTTC

In100 candidate2516 (in intron):

LOCUS ENSG00000076513

DESCRIPTION Ankyrin repeat domain-containing protein 13A (Protein KE03).

[Source:Uniprot/SWISSPROT;Acc:Q8IZ07]

AAAAGTTAACATCGTAATGTATTTGGCTTTTATTTTGTACATCATCTCTAACTGTTGCCAGGAGTTTGAGTGTTTTTTG  
TTTGTTGTTTTGTTTTGTTT

In100 candidate2517 (in intron):

LOCUS ENSG00000076513

DESCRIPTION Ankyrin repeat domain-containing protein 13A (Protein KE03).

[Source:Uniprot/SWISSPROT;Acc:Q8IZ07]

TTTCTCTGAAGGATCCTAATGATAGTTAACCATTTCTCATTTTTATTTTGCTGGATTGTTTTCTGTTTTTTGCTTCAGCA  
TTCTTGCTTTTGCTGTGCTT

In100 candidate2518 (in intron):

LOCUS ENSG00000113645

DESCRIPTION WW domain-containing protein 1 (Kidney and brain protein) (KIBR)

(HBeAg-binding protein 3). [Source:Uniprot/SWISSPROT;Acc:Q8IX03]

TCTTTTGTATATGACACCCCCACCTTATAACTATAGAAAGGTTTTGTTTGTTTTTTAATGCTTTCAGCTTTGGGCTCA  
GGAAATCCCTTCTTTTCTTC

In100 candidate2519 (in intron):

LOCUS ENSG00000122970

DESCRIPTION Intraflagellar transport 81 (Carnitine deficiency-associated

prtein expressed in ventricle 1) (CDV-1 protein).

[Source:Uniprot/SWISSPROT;Ac:Q8WYA0]

TTTGTATTGAAAAGTGGACATTGGAATCTCATAATGTAGTAACTCTGGAAATTAGGTTCTCTCTTTTCCCAGGGGTTTAC  
TGTTTTTTTGTTATAGTTTTT

In100 candidate2520 (in intron):

LOCUS ENSG00000122970

DESCRIPTION Intraflagellar transport 81 (Carnitine deficiency-associated  
prtein expressed in ventricle 1) (CDV-1 protein).

[Source:Uniprot/SWISSPROT;Ac:Q8WYA0]

AGTCAAGTTGACACCTAATAGTAACCATCACATATATTTACTTTCATTTTTGCTTTTATAAATCAGGGCTTTTCTTTCCT  
TATGTCTTCCGACTGATTTT

In100 candidate2521 (in intron):

LOCUS ENSG00000122970

DESCRIPTION Intraflagellar transport 81 (Carnitine deficiency-associated  
prtein expressed in ventricle 1) (CDV-1 protein).

[Source:Uniprot/SWISSPROT;Ac:Q8WYA0]

AGTTACTGAGAGAAGTGTGTTAAAAATCTCTAACTATAATTATGGCTTTGTTGCTTTTTTTTAGTTCCATCAGTTTTTGCT  
TCATATTTTTTTCTTAAGTT



In100 candidate2522 (in intron):

LOCUS ENSG00000113971

DESCRIPTION Acyl-CoA dehydrogenase family member 11 (ACAD-11).

[Source:Uniprot/SWISSPROT;Acc:Q709F0]

TAATATAAGAATATGTATACTCTTAACCCTTTCTACACTCTTTATCCCTCCCTTTCTTATTGTAACCTGTATCAGCTACA  
GCTTATACTTTTCACATTTTC

In100 candidate2523 (in intron):

LOCUS ENSG00000163170

DESCRIPTION Bola-like protein 3. [Source:Uniprot/SWISSPROT;Acc:Q53S33]

AGGGAATTAATTGGCCCATGTAACAAAATTATCTGGTTTCTGGCATATCTAGATTCCTCTCTCTCTGAGCTTTCAGCT  
TCTTTCCCTGTGTTGGTCTC

In100 candidate2524 (in intron):

LOCUS ENSG00000184347

DESCRIPTION Slit homolog 3 protein precursor (Slit-3) (Multiple epidermal  
growth factor-like domains 5). [Source:Uniprot/SWISSPROT;Acc:O75094]

TTTGGAGTCTAAGTGCAACACTTTGCATTTATCCTAATTAACCTTTTGGCAAATCATTTTCATTTTCATCAGCTTTTCAGGAG  
CATTTTCTATTTTCGATTTCC

In100 candidate2525 (in intron):

LOCUS ENSG00000180182

DESCRIPTION CRSP complex subunit 2 (Cofactor required for Sp1 transcriptional  
activation subunit 2) (Transcriptional coactivator CRSP150) (Vitamin D3  
receptorinteracting  
protein complex 150 kDa component) (DRIP150) (Thyroid hormone

receptor-associated protein comple [Source:Uniprot/SWISSPROT;Acc:O6024]

TAAATTAAACTAGTCCTGTGCCTTTAAATAAGTTAACGTTTCACTGTTTTTTATATCTCCAATCTCAGTCTCTCCATAA  
GTCTAGTATTGTATTTTCTT

In100 candidate2526 (in intron):

LOCUS ENSG00000188687

DESCRIPTION sodium bicarbonate transporter 4 isoform c

[Source:RefSeq\_peptie;Acc:NP\_597812]

AAACAAACCTATGACAATCTCCTTGAAGATATTAAGTATCTTTGTTTTTGTCTTTGTTTTGTAATCTTTGTACAGGGGTC  
ATGCTTATCTTTTATTATTC

In100 candidate2527 (in intron):

LOCUS ENSG00000086065

DESCRIPTION Charged multivesicular body protein 5 (Chromatin-modifying protin  
5) (Vacuolar protein sorting 60) (Vps60) (hVps60) (SNF7 domain-contains protein  
2). [Source:Uniprot/SWISSPROT;Acc:Q9NZZ3]

AGAAGAAAATAAAATTTACCTAGATTCTTACTACTAGAAATAACCACCTTTAAATGCTAATTCTTCCAGTTTCTTTCC  
TCTGCTTCTGCATACGTGGT

In100 candidate2528 (in intron):

LOCUS ENSG00000086065

DESCRIPTION Charged multivesicular body protein 5 (Chromatin-modifying protin 5) (Vacuolar protein sorting 60) (Vps60) (hVps60) (SNF7 domain-containin protein 2). [Source:Uniprot/SWISSPROT;Acc:Q9NZZ3]

GTTTTATAGCTTTAACTTTTTATTTTGCTGTTGTGTGTGTGTAGGTCTGTTTTCTTCTGCTTTTTCAGTTGCTGCATAT  
CACTTTGTCAATGTTCTTTT

In100 candidate2529 (in intron):

LOCUS ENSG00000134516

DESCRIPTION Deducator of cytokinesis protein 2.

[Source:Uniprot/SWISSPROT;Ac:Q92608]

GACGGTATAATGGCCTCTTATATTAACAAGGAGATTTGCATTCATTCATTGTCAGAGTCTGTACCACCTTTTAAAAATGT  
ATCACCTTTTTTTTACTTTT

In100 candidate2530 (in intron):

LOCUS ENSG00000144868

DESCRIPTION Transmembrane protein 108 precursor.

[Source:Uniprot/SWISSPROT;cc:Q6UXF1]

ATAGATCCCCTCATCTAGCCTTAATCTCTTCCACCTACTAACTTCCATAACACTTTATCTTGTTTTTTTTTAATTCAGGG  
TATTTATTACTTCCTCTTTT

In100 candidate2531 (in intron):

LOCUS ENSG00000196850

DESCRIPTION T-cell activation protein phosphatase 2C

[Source:RefSeq\_peptideAcc:NP\_644812]

ACAATCTGATCTCTCTTGCTTTTCCCCACAAATACTAATTTATAACCATCTTTGTTGTTGTTGTTGTTGTTCCAGGATCT  
TGTGCTTGCCATCATCTTT

In100 candidate2532 (in intron):

LOCUS ENSG00000163781

DESCRIPTION DNA topoisomerase 2-binding protein 1 (DNA topoisomerase IIbeta-binding protein 1) (DNA topoisomerase IIbeta-binding protein 1) (TopBP1).

[Source:UniProt/SWISSPROT;Acc:Q92547]

ATAGGTCACCTTAACCTGTCCTTATCTTCCATCTTTTTGTCTTTCTGTGATTTATTATGTGTAATTCCTTCAGATTTTTTTT  
CCAGATCACGAATCATCTCT

In100 candidate2533 (in intron):

LOCUS ENSG00000136436

DESCRIPTION calcium binding and coiled-coil domain 2

[Source:RefSeq\_peptideAcc:NP\_005822]

[illegible]

In100 candidate2534 (in intron):

LOCUS ENSG00000136436

DESCRIPTION calcium binding and coiled-coil domain 2

[Source:RefSeq\_peptideAcc:NP\_005822]

ACTCATAACAATAAGTGGTTTCTTCTTTTCTAAAACTTCTTTAACTCAGCTGGCATTTCAGTTATTCTTTTAACTTTCCAA  
TTGCTTAATTTTTGTCATCT

In100 candidate2535 (in intron):

LOCUS ENSG00000204852

DESCRIPTION TECT1\_HUMAN Isoform 6 of Q2MV58 - Homo sapiens (Human)

[Source:niprot/Varsplice;Acc:Q2MV58-6]

TAAGAAATCATGGCATATTAACAAAACCTTCCCCTTCACCTCACACATTTTTTTTGCAGAGTGCATTATACCTTTTACGG  
GGTACTATTTTTTTTTTTTTTTT

In100 candidate2536 (in intron):

LOCUS ENSG00000148481

DESCRIPTION CDNA FLJ13397 fis, clone PLACE1001351 (Novel protein) (Chromosome  
10 open reading frame 97) (Hypothetical protein DKFZp547B174) (DERP5) (Dermal  
papilla derived protein 5). [Source:Uniprot/SPTREMBL;Acc:Q9H8M7]

GACAAATGAACTGTATTTATATTACAATTTTTATTCCGTGTAACAATCTATTTTACCTGTTCTTTCCTTTATTCCCAGCT  
TTGTTCTTTTTCTTGTGTTT

In100 candidate2537 (in intron):

LOCUS ENSG00000204764

DESCRIPTION Ran-binding protein 17. [Source:Uniprot/SWISSPROT;Acc:Q9H2T7]

CCCAAAGGCCCTCTCTCTTAAACCATCACATTGGAAATTAGATTTTAACATACGAATTTCCCGCATTTTTTCTGCAGCT  
CTGTTTGTTTTTTTATTCTTT

In100 candidate2538 (in intron):

LOCUS ENSG00000204764

DESCRIPTION Ran-binding protein 17. [Source:Uniprot/SWISSPROT;Acc:Q9H2T7]

TGTATCGTTTGAGTGGTTGTAGGAAATCTTATCCCTAGAGTAACTCTTCATTTTCTTTTCTTCATGGTTTCTCTCAGTT  
TTTGTCTAGATCTTGACCTT

In100 candidate2539 (in intron):

LOCUS ENSG00000204764

DESCRIPTION Ran-binding protein 17. [Source:Uniprot/SWISSPROT;Acc:Q9H2T7]

AGCCAAAAGACAAATATTTGTACTTAAGGTGGCATTTTTCACTTCACATAACACTTGCACTGATTTTTTACCTCACAGCT  
TACTTTCTGCCTATCCTTTG

In100 candidate2540 (in intron):

LOCUS ENSG00000204842

DESCRIPTION Ataxin-2 (Spinocerebellar ataxia type 2 protein)

(Trinucleotiderepeat-containing gene 13 protein).

[Source:Uniprot/SWISSPROT;Acc:Q99700]

CTGTGGCTTAGGTCCGTTGTCCTAACCTGTGGCTTAGGTTCTGTTTTTGTGCTTGCTACTTGCTCCCCCTTTTTCAGCC  
ATTCCTGTTTTCTTTCTTTT

In100 candidate2541 (in intron):

LOCUS ENSG00000204842

DESCRIPTION Ataxin-2 (Spinocerebellar ataxia type 2 protein)

(Trinucleotiderepeat-containing gene 13 protein).

[Source:Uniprot/SWISSPROT;Acc:Q99700]

AGCCAATTTTCTCCATGTTTGACCTAATTGTGATTTTCATAGATGTTAACTAAAACCTCTTAATTTTCGTTTTCTCAGTATG  
CTATTTTTTTTTTTTTTTTAGC

In100 candidate2542 (in intron):

LOCUS ENSG00000204842

DESCRIPTION Ataxin-2 (Spinocerebellar ataxia type 2 protein)  
(Trinucleotiderepeat-containing gene 13 protein).

[Source:Uniprot/SWISSPROT;Acc:Q99700]

AAAGATGAACCCATTTCTTTGCCTGACTTGCTTTATAACTTTTGGCAAATAGTTTCTACTTCTGTACCTGGTCTTCAGAT  
CTCTTTCCTGCTTTAACTAA

In100 candidate2543 (in intron):

LOCUS ENSG00000086102

DESCRIPTION Transcriptional repressor NF-X1 (EC 6.3.2.-) (Nuclear  
transcription factor, X box-binding, 1). [Source:Uniprot/SWISSPROT;Acc:Q12986]

TGCTAGCCCATTTCTGCATGTTTTTTTTTCCTTTCCTGCCTTTTAATGACTAACTTCCCTCTAGTTGTTGATTTTTCAGAT  
TTTGTTTCTTTACTGTCTGT

In100 candidate2544 (in intron):

LOCUS ENSG00000165983

DESCRIPTION Phosphotriesterase-related protein (Parathion  
hydrolaserelatedprotein)

(HPHRP). [Source:Uniprot/SWISSPROT;Acc:Q96BW5]

ACACTAACTCATTGTATTTCTATAATTACCGTGATTTTTTGTCTTCTCGTCTGTAGTGGCTCCCCCTTTTCTGGCAGCA  
TCTCTGTAACCTCTGTTCTT

In100 candidate2545 (in intron):

LOCUS ENSG00000198740

DESCRIPTION zinc finger protein 652 [Source:RefSeq\_peptide;Acc:NP\_055712]

ATAACTTTCAAAACTGAGTTGGCTTTTGTCTCCTGTCAGCTCCAGGTTCTCTAGCCACATCCACAGTTCTTTTCT  
TACCATACTTCTTTTTTTTTT

In100 candidate2546 (in intron):

LOCUS ENSG00000147044

DESCRIPTION Peripheral plasma membrane protein CASK (EC 2.7.11.1) (hCASK)  
(alcium/calmodulin-dependent serine protein kinase) (Lin-2 homolog).

[SourceUniprot/SWISSPROT;Acc:O14936]

AAATTAGTAATCTAACTATATATTATCAATCTTTTGCTGTCTTATCTTACAGGTTTTCTTTCTGGTTTTTCATACTGGATA  
GTCTCTATTGACCTAGCTTC

In100 candidate2547 (in intron):

LOCUS ENSG00000147044

DESCRIPTION Peripheral plasma membrane protein CASK (EC 2.7.11.1) (hCASK)  
(alcium/calmodulin-dependent serine protein kinase) (Lin-2 homolog).

[SourceUniprot/SWISSPROT;Acc:O14936]

AGTAAATCAACTAATAACTTAGTTACAATGTATTCACCTTTCAGTGTTGTCTTCCTGGAATTTCTCTTTTCTTATGTTCT  
TTTTCACATTTTTTTTACAGT

In100 candidate2548 (in intron):



LOCUS ENSG00000147044

DESCRIPTION Peripheral plasma membrane protein CASK (EC 2.7.11.1) (hCASK)  
(alciium/calmodulin-dependent serine protein kinase) (Lin-2 homolog).

[SourceUniprot/SWISSPROT;Acc:O14936]

CTCTTTCAAGGTGTTAATGTAATGTGATAATGGATTTCCCTGAATTCATAACACATTTATTTATTCCTTTACTCTCAGCT  
GTTAATTTTTTCCTCACTTT

In100 candidate2549 (in intron):

LOCUS ENSG00000148484

DESCRIPTION Ras suppressor protein 1 (Rsu-1) (RSP-1).

[Source:Uniprot/SWISSROT;Acc:Q15404]

AGATAACTGTAAAATATCTGCCATATCCGAGTGTGCTTCTTTTGCTTGATTTCTCTCCTCAGCCTTTCTTCTTTTTAGAG  
TACCTTGTAATTTTGTTGTA

In100 candidate2550 (in intron):

LOCUS ENSG00000148484

DESCRIPTION Ras suppressor protein 1 (Rsu-1) (RSP-1).

[Source:Uniprot/SWISSROT;Acc:Q15404]

AGTAACAAACTCATTGACCTTGCGTTTTGCTGTTTTTCAGTCTGAACCCTCTTTTGTCTAATTTTTTGCTGGTTCTTTAGC  
TTTTTTCCCCTGCCTATCTA

In100 candidate2551 (in intron):

LOCUS ENSG00000148484

DESCRIPTION Ras suppressor protein 1 (Rsu-1) (RSP-1).

[Source:Uniprot/SWISSROT;Acc:Q15404]

AGAAAAGGGTAGCATTTATGATCTGTCATCCAAAAATAACCACTTTAAATTCTGAGATTTTTTTCCAGTCTTTTCTCTGT

TCATATGCATATACACTTAT

In100 candidate2552 (in intron):

LOCUS ENSG00000125821

DESCRIPTION Probable D-tyrosyl-tRNA(Tyr) deacylase 1 (EC 3.1.--).

[Source:niprot/SWISSPROT;Acc:Q8TEA8]

AATGCTGGATGGAATATATTTCTTTAACTCTTTGTATTTTCATTTTATTCATTTTATTTTAAAAATTTTCCTACAGCT

TTCATAGGCTGACTTTCTTT

In100 candidate2553 (in intron):

LOCUS ENSG00000154928

DESCRIPTION EPHB1\_HUMAN Isoform 3 of P54762 - Homo sapiens (Human)

[Source:niprot/VarSplic;Acc:P54762-3]

AGACCTCTCTCTCTGTGGGTTAATATTAACAAAAATGATTGTTTCTGCTGACCAGAAGTCCTGTTTTTCTGTTGTGCTAT

CTCCTCCACTGATTTCTGAG

In100 candidate2554 (in intron):

LOCUS ENSG00000168246

DESCRIPTION Ubiquitin domain-containing protein 2 (Dendritic cell-derived ubiquitin-like protein) (DC-UbP) (Ubiquitin-like protein SB72).

[Source:Uniprot/SWISSPROT;Acc:Q8WUN7]

ACCTGGAACAATTAAAAGCTAAGCAAAGAATCTTGTAACCCTAAATTATCTATTTTTTTCTGTCATTCTAGTTTCCAGTT  
ACATGATTCTTTCCTTTTGG

In100 candidate2555 (in intron):

LOCUS ENSG00000198270

DESCRIPTION Transmembrane protein 116. [Source:Uniprot/SWISSPROT;Acc:Q8NCL8  
TCTGTATTCTCTCTCAACATTTAACTTTTTCTACCCACTCTACATTTTGTTCTTCCTTTTATTAGTTTTCTCTCCCAGGT  
TTCTTTTTTCTTAAACTCCT

In100 candidate2556 (in intron):

LOCUS ENSG00000185052

DESCRIPTION Sodium/potassium/calcium exchanger 3 precursor (Na(+)/K(+)/Ca(2)-  
exchange protein 3) (Solute carrier family 24 member 3).

[Source:UniprotSWISSPROT;Acc:Q9HC58]

AGGCCTATCTTTATTCTAACTTTTAGAACATTCCCAATTATTCTTCTGCTTTCAGCTTCAAAAATTTTGTTGTTCTTAT  
CAGCTCTTCTATTCTTTTG

In100 candidate2557 (in intron):

LOCUS ENSG00000118007

DESCRIPTION Cohesin subunit SA-1 (Stromal antigen 1) (SCC3 homolog 1).

[Souce:Uniprot/SWISSPROT;Acc:Q8WVM7]

AGCCACCGCATCTGGCCAAAATCTAAAGTAATATTAATTCAAATTTTAACTCTCTCTCTTTTACTTATGTCCTCAGAT  
TTTCTAATCCTTAGTTTGCC

In100 candidate2558 (in intron):

LOCUS ENSG00000118007

DESCRIPTION Cohesin subunit SA-1 (Stromal antigen 1) (SCC3 homolog 1).

[Source:Uniprot/SWISSPROT;Acc:Q8WVM7]

CACCTCTGCTTTTTTGAATATCTGTGCCTTAACTGGAATACCTTTTTCTGTAGCTAGATTATTTTCTCCTTCAGGACTC  
AGCTTACATGTTATCTTCTT

In100 candidate2559 (in intron):

LOCUS ENSG00000164463

DESCRIPTION adult retina protein (LOC153222), mRNA

[Source:RefSeq\_dna;Acc:N\_153607]

CTTTGACTCTTAAATGAATCTTAACACAACCTTGCATACTACCTTTTTGTGATATCTCATTTCTGATCTCAGCTAGTTTT  
GAGTACATGTTCTTCCTTCC

In100 candidate2560 (in intron):

LOCUS ENSG00000159374

DESCRIPTION CDNA FLJ26651 fis, clone MPE05072.

[Source:Uniprot/SPTREMBL;AccQ6ZP30]

ATCTTTTCGAGTCCTTGGCATTGCTTTCTTCAAAGAAAGCCTCAAATAACTGAACATTGACACTGTTTCTCCTTTTCAGAT  
ATTCCTTCCACATTTAATTT

In100 candidate2561 (in intron):

LOCUS ENSG00000159374

DESCRIPTION CDNA FLJ26651 fis, clone MPE05072.

[Source:Uniprot/SPTREMBL;AccQ6ZP30]

TTTAACTCCATCTTTGGTTTTTTATTCTTTCATATACCTTTTTCATATGTTCTTTTAAAATCTGATTTCAAGTCAGCTCC  
ATATTTAACTCTCTTGCCTT

In100 candidate2562 (in intron):

LOCUS ENSG00000171659

DESCRIPTION Probable G-protein coupled receptor 34.

[Source:Uniprot/SWISSPRt;Acc:Q9UPC5]

GTGAAGACACATATAACAAAGTGAAACCCTTTTCTCTATGGCTTTGTAAAGCATTCTCATCTCCAGGGTAACGTGCCTAT  
TTCCTTCAACTTGCTTCTTT

In100 candidate2563 (in intron):

LOCUS ENSG00000114098

DESCRIPTION armadillo repeat containing 8 isoform 1

[Source:RefSeq\_peptide;cc:NP\_054873]

TATTTTTATACAATAATTCTTCCTTATAAACTATTTACTAGTGCATAACGTACTAGTTACCTCACATTTTGGTTTCAGAA  
CTGATTTCTGTCACTTCTTA

In100 candidate2564 (in intron):

LOCUS ENSG00000089127

DESCRIPTION 2',5'-oligoadenylate synthetase 1 isoform 3

[Source:RefSeq\_peptide;Acc:NP\_001027581]

CTCCCATCTGTGGGTTGTCTGTAACTCTGCTAATTATTTCTTTTGCTTTGCAGAAGCTTTTGTAGTTTAATTAAGTCCC  
ATCTATTTATCTTTGTTTTT

In100 candidate2565 (in intron):

LOCUS ENSG00000089101

DESCRIPTION Uncharacterized protein C20orf26.

[Source:Uniprot/SWISSPROT;Acc:Q8NHU2]

GCACATGGCCCATCTGCTGTTTTGAGCTAATAACCTCTGTTGGCTCTTTGCTTTTTGTTTTTCAGTGATTTCTCAGCCCT  
ATACTTATCACTCATTTTAT

In100 candidate2566 (in intron):

LOCUS ENSG00000176204

DESCRIPTION Leucine-rich repeat transmembrane neuronal protein 4  
precursor.[Source:Uniprot/SWISSPROT;Acc:Q86VH4]

AGTGTTCCCTTTCTTTTATAACACTTTTCTTTTTCATTTTATCTCTTTATTTTCTTCAAGTCTTGTCAGATAGACTCA  
GTCTTCAATTTTTTTGTTTT

In100 candidate2567 (in intron):

LOCUS ENSG00000176204

DESCRIPTION Leucine-rich repeat transmembrane neuronal protein 4  
precursor.[Source:Uniprot/SWISSPROT;Acc:Q86VH4]

AGATATTCACCTGTGATTGGTGATCGTTACTTTGTAAAATATGTTACAATAACAATGTTATTATTTACCTTTCTAACAGTG  
TTTTCATTCTTCCCTTTATG

In100 candidate2568 (in intron):

LOCUS ENSG00000176204

DESCRIPTION Leucine-rich repeat transmembrane neuronal protein 4

precursor.[Source:Uniprot/SWISSPROT;Acc:Q86VH4]

AAGTTCACATATACTAACTTTAAATCTGAGCTTGATCCATTTTCGCTTACTTTCCTTTACAGATTTGTTGTTCCATCAAC  
AATGGTTTATTTACTTTCCC

In100 candidate2569 (in intron):

LOCUS ENSG00000176204

DESCRIPTION Leucine-rich repeat transmembrane neuronal protein 4

precursor.[Source:Uniprot/SWISSPROT;Acc:Q86VH4]

GCAAAACTCTGTCTCAAAAAAAAAAAAAAAAAAAAAAGGAAATGTAACGGTATTTTTTTTTTGCATTCCTTTTCCCAGGA  
ATCCTTTTGTATTCCTTTGT

In100 candidate2570 (in intron):

LOCUS ENSG00000176204

DESCRIPTION Leucine-rich repeat transmembrane neuronal protein 4

precursor.[Source:Uniprot/SWISSPROT;Acc:Q86VH4]

AGCTCCTGGATTCATTAACCTTTTTGAAGGGTTTTTGTGTCTCTATTTCTTCAGTTCTGCTCTGATTTTAGTTATTTCT  
TGCCTTCTGCTAGCTTTTGA

In100 candidate2571 (in intron):

LOCUS ENSG00000069535

DESCRIPTION Amine oxidase [flavin-containing] B (EC 1.4.3.4) (Monoamine

oxiase type B) (MAO-B). [Source:Uniprot/SWISSPROT;Acc:P27338]

ACAAAATCTAGTTTTTCGTGGATATACCCTTAAGCTGTATCTATAACTTGTGAAATGTCGATTTGCTTATTTTCAGGACTG  
TCTTTTGTATTTTATACAT

In100 candidate2572 (in intron):

LOCUS ENSG00000175115

DESCRIPTION Phosphofurin acidic cluster sorting protein 1 (PACS-1).

[Source:Uniprot/SWISSPROT;Acc:Q6VY07]

ATTACCTGGCTTGTGCTGCATCTTTATTTTTCCCTTCACCTCAAGTTAACTTTATCGTTCATATTTCTGATTTTGCAGTA  
GTGTCTCTAATTTCTCCTTG

In100 candidate2573 (in intron):

LOCUS ENSG00000188624

DESCRIPTION Insulin growth factor-like family member 3 precursor.

[Source:Uiprot/SWISSPROT;Acc:Q6UXB1]

GATAATCTCCACCTTTAAACCACCCTAACCTCTGTTTGTTTGTTTGTTGTTTTTCCATACTTGTCACATTCTCAGCTC  
CATGTTCAACCTTTTTTCCTT

In100 candidate2574 (in intron):

LOCUS ENSG00000066032

DESCRIPTION Catenin alpha-2 (Alpha-catenin-related protein) (Alpha N-cateni).

[Source:Uniprot/SWISSPROT;Acc:P26232]

TAACATACGTATTTTTTCTTATTTCTTCAACTATTTGTGCTTTTTTAAAATTCTTTTGGTTAATTTCTTCAGCT  
ATCTTCTAGTTTTTTTTCTT



In100 candidate2575 (in intron):

LOCUS ENSG00000066032

DESCRIPTION Catenin alpha-2 (Alpha-catenin-related protein) (Alpha N-cateni).

[Source:Uniprot/SWISSPROT;Acc:P26232]

TAGTTTATATGTAAAAGAACTGGAGGTTATAAAGGTAACAAAGACCTTAAACATTACATTGATTTTTTTTCTCAGAG  
CTTTTTTTCTTCTTGTTGTA

In100 candidate2576 (in intron):

LOCUS ENSG00000066032

DESCRIPTION Catenin alpha-2 (Alpha-catenin-related protein) (Alpha N-cateni).

[Source:Uniprot/SWISSPROT;Acc:P26232]

TGGATGCTCATGAGTTTCTTTTTTGTTTGCTTTTGGTGTTAACTTACTGCCTCTCTTGCGGTTTTCCAGATTGCTAAACC  
TTCTCTATTGAACTCTTCT

In100 candidate2577 (in intron):

LOCUS ENSG00000066032

DESCRIPTION Catenin alpha-2 (Alpha-catenin-related protein) (Alpha N-cateni).

[Source:Uniprot/SWISSPROT;Acc:P26232]

ATAACTTTTCTACCATACAAAGTCTTTTCCTTCTTCTCCTGAATCACATTCTTTTTCTCAGCAATCATTTACCATTGTA  
TTTGAACGTCTCTCTTTCTC

In100 candidate2578 (in intron):

LOCUS ENSG00000066032

DESCRIPTION Catenin alpha-2 (Alpha-catenin-related protein) (Alpha N-cateni).

[Source:Uniprot/SWISSPROT;Acc:P26232]

GAAAAAGCTATTAACTTGATCTCATAATGCCCAAGAGTTTTGCTTTTTTAACTTTTCCTATTTTTTTTTTAACTCTACAGTC

TTAAGTTTATTTTCTTTTAA

In100 candidate2579 (in intron):

LOCUS ENSG00000107341

DESCRIPTION ubiquitin-conjugating enzyme UBC3B

[Source:RefSeq\_peptide;Acc:N\_060281]

ATTGTCTTTGCTCCTAGTAAAATAAAATTATGTATTGTCTTTTAACATGTAAAAAATCATCTTTCTTATATTCAGTTTCT  
TTGTCTTTAGCTAGAGCTTT

In100 candidate2580 (in intron):

LOCUS ENSG00000051382

DESCRIPTION Phosphatidylinositol-4,5-bisphosphate 3-kinase catalytic subunit  
beta isoform (EC 2.7.1.153) (PI3-kinase p110 subunit beta) (PtdIns-3-kinase p110)  
(PI3K) (PI3Kbeta). [Source:Uniprot/SWISSPROT;Acc:P42338]

GTTTAGTAATTTATAGGTATCGATATAGAATCTACGTAGTAACAAATGGGAATTTCTGCTTGTTCTTCCCATTGTCAGGT  
TATCATATTTGTCTTCTGTA

In100 candidate2581 (in intron):

LOCUS ENSG00000051382

DESCRIPTION Phosphatidylinositol-4,5-bisphosphate 3-kinase catalytic subunit  
beta isoform (EC 2.7.1.153) (PI3-kinase p110 subunit beta) (PtdIns-3-kinase p110)  
(PI3K) (PI3Kbeta). [Source:Uniprot/SWISSPROT;Acc:P42338]

AACTTTCCTGTTCTCTCCTTTATGTCTCTTAACCTTCCATATTTTCTATCTTTTCATATCTTATCATTATAACAGTTTTC  
CTCAAGTCTCTGTGTGCTCT

In100 candidate2582 (in intron):

LOCUS ENSG00000163541

DESCRIPTION Succinyl-CoA ligase [GDP-forming] subunit alpha, mitochondrial  
recursor (EC 6.2.1.4) (Succinyl-CoA synthetase subunit alpha) (SCSalpha).  
[Source:Uniprot/SWISSPROT;Acc:P53597]

TAGCATTCTAACTGGCCTTTCTGTTTTTAGACATACCTTTCATCATTTTTGTGTCCTATTTTCAGACTACACTTCCCCAT  
AGTCTTTTAGTTGTAGTTCT

In100 candidate2583 (in intron):

LOCUS ENSG00000188559

DESCRIPTION OTTHUMP00000030392 (Fragment).  
[Source:Uniprot/SPTREMBL;Acc:Q5TK3]

TGCATATTTATTATTCAAAAGGTCAAGTAACTAAGACCTCTGTTCTTTTAAACCAAATCTGTTTTCTTCTCGGTCAGCAT  
TTTCTTTACCCAGAGCTCTT

In100 candidate2584 (in intron):

LOCUS ENSG00000188559

DESCRIPTION OTTHUMP00000030392 (Fragment).  
[Source:Uniprot/SPTREMBL;Acc:Q5TK3]

AGAAAATGCAATAGATCTAGGATGTATTATATAATTTTATTGTAAGTATATAATTCTTTCTCCATTTTAAATATCAGAT  
AATCCTGTCTTTTGGTATTT

In100 candidate2585 (in intron):

LOCUS ENSG00000188559

DESCRIPTION OTTHUMP00000030392 (Fragment).

[Source:Uniprot/SPTREMBL;Acc:Q5TK3]

GTATCTGTTTATAACCTTCACCCACTTTCATATGGGGTTGTTTGTTTGTTTGTTTTCTTTTTTTTACCATATACAGTT  
TTATTTTTTTAATTTATTTTT

In100 candidate2586 (in intron):

LOCUS ENSG00000147050

DESCRIPTION Ubiquitously transcribed X chromosome tetratricopeptide repeat  
rotein (Ubiquitously transcribed TPR protein on the X chromosome).

[Source:niprot/SWISSPROT;Acc:O15550]

TGGGTGACGATTAACCTGGGTTTCCTTTTTCTTCCCTCCATCCTTTTTGTGTGTGTTAATGATTATTCATTAGGCAGTT  
GTTTTGTTGTTGTTGTTGTT

In100 candidate2587 (in intron):

LOCUS ENSG00000147050

DESCRIPTION Ubiquitously transcribed X chromosome tetratricopeptide repeat  
rotein (Ubiquitously transcribed TPR protein on the X chromosome).

[Source:niprot/SWISSPROT;Acc:O15550]

AGTCTTTTTAACTTTAGCCCATCTGCCATTCTTGTTTTTTCTTCTTTCTTGTTTTCTTTCTTTCTTTCTCCTCCTCAGTCT  
TTTTAACTTTAGCCCGTCTA

In100 candidate2588 (in intron):

LOCUS ENSG00000147050

DESCRIPTION Ubiquitously transcribed X chromosome tetratricopeptide repeat  
rotein (Ubiquitously transcribed TPR protein on the X chromosome).

[Source:niprot/SWISSPROT;Acc:O15550]

ACATACTGACATATTGATTCTTTGAAAAGAAATTTAGAACTCATATCTAACAACCCCTCCCCTTGTATTTCTTCACAGCT  
TTCTTTTCAAACCTTTTTTTTA

In100 candidate2589 (in intron):

LOCUS ENSG00000147050

DESCRIPTION Ubiquitously transcribed X chromosome tetratricopeptide repeat  
rotein (Ubiquitously transcribed TPR protein on the X chromosome).

[Source:niprot/SWISSPROT;Acc:O15550]

ATTTGAGTTACTGCTAGTTTTTAAAAAAGTCTTATCCAATAGTAACTTTTAATGAAGTATTTAAATGCCTTTCCTTCAGAC  
TTCCAGTATTTTTTTTCTATA

In100 candidate2590 (in intron):

LOCUS ENSG00000186854

DESCRIPTION

CCGTCTCAAAAAAAAAAAAAAAAAAAAAAAGATTCACATGAAGTCTAACCTTTTGGGAGCAATTTGCTTTTATCTCAGTC  
TTTTGCTTTTTTTACATAATT

In100 candidate2591 (in intron):

LOCUS ENSG00000176407

DESCRIPTION potassium channel modulatory factor 1

[Source:RefSeq\_peptide;Ac:NP\_064507]

AATAGAACATCTCATCCACATGTCCATATCCACTAACTGGATCTTTGTTTTGATAATCCTCTTCCCTTTCTCTGCAGGTT  
TACTCCCAGTATATCCATTT

In100 candidate2592 (in intron):

LOCUS ENSG00000088930

DESCRIPTION 5'-3' exoribonuclease 2 (EC 3.1.13.-) (DHM1-like protein) (DHP  
rotein). [Source:Uniprot/SWISSPROT;Acc:Q9H0D6]

TTAGGCTTTGACCACCAAGTATGATGTAACTGTTAGGTTATTTTTTTGTTTGTTTGTTTTGTTTTTGCAGATGCCCTT  
TATGTTGAGAATTTCCCTTC

In100 candidate2593 (in intron):

LOCUS ENSG00000182404

DESCRIPTION Lyr motif-containing protein 4.

[Source:Uniprot/SWISSPROT;Acc:QHD34]

CACTCATAGGAGAAGAAAGCCCTGTAACCCCAAGGGTTGTTTCCTTGTTGTTACTTTTGTTGTTTGTCATGTCAGCCCTC  
TCTTCTTGTTTAAGGAATCT

In100 candidate2594 (in intron):

LOCUS ENSG00000145982

DESCRIPTION Phenylalanyl-tRNA synthetase, mitochondrial precursor (EC  
6.1.120) (Phenylalanine--tRNA ligase) (PheRS).

[Source:Uniprot/SWISSPROT;Acc:O9563]

TGGGGATTTAGGATTTCTAACTTTTAAATTTCTCTTTCTGTCCTTGAGTTTCCAGCCTTTCTTTGGCACAGTTTCTTTGC  
TAAACATTGGCATTTCCTT

In100 candidate2595 (in intron):

LOCUS ENSG00000145982

DESCRIPTION Phenylalanyl-tRNA synthetase, mitochondrial precursor (EC  
6.1.120) (Phenylalanine--tRNA ligase) (PheRS).

[Source:Uniprot/SWISSPROT;Acc:O9563]

TTCTGTAACTCCTTCCTGTGTATTTTTCATCTCATTCATTTGCTTCAGTTTGGATCTTTTTTAATATCATCCCTGTTTCT  
ACTTAACGTGTTTAGTCTTT

In100 candidate2596 (in intron):

LOCUS ENSG00000145982

DESCRIPTION Phenylalanyl-tRNA synthetase, mitochondrial precursor (EC  
6.1.120) (Phenylalanine--tRNA ligase) (PheRS).

[Source:Uniprot/SWISSPROT;Acc:O9563]

GTCTAAAATGTCAAAAGAAAAGTAGATGAGGAAAAAGCAATCGAAAATAACTCTATTACAAGCTTCCTTATAGTTCAGAT  
TCATCCCTTTCTTTTGGACC

In100 candidate2597 (in intron):

LOCUS ENSG00000114120

DESCRIPTION solute carrier family 25, member 36

[Source:RefSeq\_peptide;Acc:P\_060625]

TCTTTAATGATTTGTGCTTCTTTTGATGTCCATATAAGAAGTCTGTGCCTAACGCAAAGTTAAAAGATTTTTTTCCAGAT  
GTTTTTTTCCTAGATGTTT

In100 candidate2598 (in intron):

LOCUS ENSG00000123066

DESCRIPTION Thyroid hormone receptor-associated protein 2 (Thyroid hormone receptor-associated protein complex 240 kDa component-like).

[Source:UniprotSWISSPROT;Acc:Q71F56]

TCTGAGCACTGAGGATTCCTATTGCTACTAACTTACTCATACCTTTTAGGCCTTTTCAGTGAACAGACTTAGACGCATGT  
CTTTTTTTTTTTCTTTTTTT

In100 candidate2599 (in intron):

LOCUS ENSG00000123066

DESCRIPTION Thyroid hormone receptor-associated protein 2 (Thyroid hormone receptor-associated protein complex 240 kDa component-like).

[Source:UniprotSWISSPROT;Acc:Q71F56]

AGCCTCACTCTTGTCTTTTGTGGTAACTTACACTAGTCTTTCCTTATATGTCTTCACTTTTACCACCAGCTCTAGCACTG  
GACTGTTTTTTTATTTTTAT

In100 candidate2600 (in intron):

LOCUS ENSG00000123066

DESCRIPTION Thyroid hormone receptor-associated protein 2 (Thyroid hormone receptor-associated protein complex 240 kDa component-like).

[Source:UniprotSWISSPROT;Acc:Q71F56]



GTAAATTCTTCATTATTATTCTCTAGTTTATTAACCTCTTTCAATTTTACTGTTTACATTTTATCTCTTACTCAGTT  
TTTCATTTCCATTGCTTATT

In100 candidate2601 (in intron):

LOCUS ENSG00000065923

DESCRIPTION Sodium/hydrogen exchanger 7 (Na(+)/H(+) exchanger 7) (NHE-7)  
(Slute carrier family 9 member 7). [Source:Uniprot/SWISSPROT;Acc:Q96T83]

GAATTGCATTGTCATCTTTATCGAAAATCAATTAACCATAAACACACCATTTTATTTTGGACTCTCAGTTTGGCTCCAT  
TGAGCTATGTGTCTATCCTT

In100 candidate2602 (in intron):

LOCUS ENSG00000087206

DESCRIPTION Ubiquitin interaction motif-containing protein 1 (Retinoid X  
receptor- interacting protein 110) (Receptor-associated protein 80) (Nuclear zinc  
finger protein RAP80). [Source:Uniprot/SWISSPROT;Acc:Q96RL1]

TAATTTAGCTACTCAAAGATGATAACCTTTAATGTATTGGCCTATTTTCTTCCAGTCTTTTTTCTATGCATTGTTAATG  
TAATTAACACTATTCTCCCT

In100 candidate2603 (in intron):

LOCUS ENSG00000069849

DESCRIPTION Sodium/potassium-transporting ATPase subunit beta-3  
(Sodium/potassium- dependent ATPase beta-3 subunit) (ATPB-3) (CD298 antigen).  
[Source:Uniprot/SWISSPROT;Acc:P54709]

TTTTCCTAGCTTCATAATCCTAGCCACCCGTACCAAATTTTCATTAACACTCCCACCAACCTTGTCCTCATTTTATCAGGA  
TCTGGTAGTGCCTTTTCTTT

In100 candidate2604 (in intron):

LOCUS ENSG00000112799

DESCRIPTION Lymphocyte antigen 86 precursor (MD-1 protein).

[Source:UniprotSWISSPROT;Acc:O95711]

AGTAACTGAACAAGTCTTTCATGGCTATGTTGTTCTGTTCTGTTTTGTCTTCTTCCTTTGATCTAAGGTCAGCCTCTAA  
ATTTTTATTTTCTACCACTG

In100 candidate2605 (in intron):

LOCUS ENSG00000114126

DESCRIPTION Transcription factor Dp-2 (E2F dimerization partner 2).

[SourceUniprot/SWISSPROT;Acc:Q14188]

AAAAAATAATTTAATAATTTAACTTTCATTTCTTATATGATGTTCCCTTTGTTTGTTTCTTTCTATTTCTTTAATCAGCT  
CTTACTCATTTCTTTCTGTT

In100 candidate2606 (in intron):

LOCUS ENSG00000114126

DESCRIPTION Transcription factor Dp-2 (E2F dimerization partner 2).

[SourceUniprot/SWISSPROT;Acc:Q14188]

AAGGTCTTAAATACTTGGTAAATGAATAAATGTTGACTAGACTTTAATAACTAGGTCTGAACTATTTTTATGCTTCAGAG  
GTTATTGTTTGACTCTTTCC

In100 candidate2607 (in intron):

LOCUS ENSG00000174989

DESCRIPTION F-box/WD repeat protein 8 (F-box and WD-40 domain protein 8)  
(Fbox only protein 29). [Source:Uniprot/SWISSPROT;Acc:Q8N3Y1]

ACTGGAATAACTTCCTTTCCTCTTTCCTGTTCTTTGCCTGCCTTTTAAAGCTCAGCTTGAGTTCTGTCTCCTGTGTTAAT  
TCTTCCGTGATTTCTCCAGC

In100 candidate2608 (in intron):

LOCUS ENSG00000174989

DESCRIPTION F-box/WD repeat protein 8 (F-box and WD-40 domain protein 8)  
(Fbox only protein 29). [Source:Uniprot/SWISSPROT;Acc:Q8N3Y1]

ATTAAGTGCATTTTTATTTTTTTATTGGCTGTTTTGTGTATGATTTACTCTTTTGTCACTGGCTCCCCCTCTCCCCAGTT  
GTCTATCTTTCTCATTCCTG

In100 candidate2609 (in intron):

LOCUS ENSG00000008294

DESCRIPTION C-jun-amino-terminal kinase-interacting protein 4 (JNK-interactng  
protein 4) (JIP-4) (JNK-associated leucine-zipper protein) (JLP) (Spermssociated  
antigen 9) (Mitogen-activated protein kinase 8- interacting proten 4)  
(Human lung cancer protein 6) (HLC [Source:Uniprot/SWISSPROT;Acc:O6027]

CTCATTTTAGTGAATGGCTTCTCAAATGCCATCTATTATTTTAAACCAATGGTCTTTTATGACTTCTTTCCCAGTGTCT  
GTTTACTAATTTGTGTTCTT

In100 candidate2610 (in intron):

LOCUS ENSG00000008294

DESCRIPTION C-jun-amino-terminal kinase-interacting protein 4 (JNK-interactng  
protein 4) (JIP-4) (JNK-associated leucine-zipper protein) (JLP) (Spermssociated

antigen 9) (Mitogen-activated protein kinase 8- interacting protein 4)  
(Human lung cancer protein 6) (HLC [Source:Uniprot/SWISSPROT;Acc:O6027])  
CCCTACTCCATTTACTGAGGTACTTAAAAATAACTAGCATGCTGTATCTCTTTTTTTCCAGCTTTGTCTTGAATTGGCA  
TTGCCATCCTTGTTTTATCT

In100 candidate2611 (in intron):

LOCUS ENSG00000204904

DESCRIPTION Putative uncharacterized protein CXorf31.

[Source:Uniprot/SWISSPROT;Acc:Q5VT33]

TCACCTTTTGACCCCACTCCCCTTGTTTCCCCTTGCTTCTATAAGTAACTTGTATTAGTTTCTTATTTGCCCTTTCAGTG  
GTTCTTTTTTTGGGTTTTTTT

In100 candidate2612 (in intron):

LOCUS ENSG00000175054

DESCRIPTION Serine/threonine-protein kinase ATR (EC 2.7.11.1) (Ataxia  
telangiectasia and Rad3-related protein) (FRAP-related protein 1).

[Source:Uniprot/SWISSPROT;Acc:Q13535]

GAAGTACTTATTTTCTGTGTGCATGTGCTACCAATTTAACATTTAGTTAGGTTCACTTGTTTCAGTTTCTTTAAACTTT  
TAAGGGTTGCTTTTTCCCTC

In100 candidate2613 (in intron):

LOCUS ENSG00000148482

DESCRIPTION solute carrier family 39 (zinc transporter), member 12

[Source:efSeq\_peptide;Acc:NP\_689938]

TTTTTAATTGGAAATTGTCTGTTTTCTCTTAACTTTTAAAAGTTCCTTGTCTATTTTGGATACCATTCTTTATCAGAT  
GTTTTGCACATGTTTTCCCC

In100 candidate2614 (in intron):

LOCUS ENSG00000068654

DESCRIPTION DNA-directed RNA polymerase I largest subunit (EC 2.7.7.6)

(RNAPolymerase I 194 kDa subunit) (RPA194). [Source:Uniprot/SWISSPROT;Acc:O9560]

TTTCTCAAAAAGAAAAGTGTGACCTTAACTCTACATATTATCTTGTATTCTGTTTTTCTCACTCAGTAATATTTT  
TGGTTGTCCTCCCATGCCCT

In100 candidate2615 (in intron):

LOCUS ENSG00000171435

DESCRIPTION Kinase suppressor of ras-2 (hKSR2).

[Source:Uniprot/SWISSPROT;Ac:Q6VAB6]

TGTGGACATTTTAACAATATTAATTTTCCATTCTATGAACATGGGATATCTTCCATTTTCTCATGTCTTCTTCAGTT  
TCTTTTTTTCAGTGTTTTATA

In100 candidate2616 (in intron):

LOCUS ENSG00000120756

DESCRIPTION Plastin-1 (I-plastin) (Intestine-specific plastin).

[Source:Uniprot/SWISSPROT;Acc:Q14651]

AACATAACTAGAACTATGCTTTTTGGCCTTTTGACAAAATTACCTGTAACCTTTTCCCCTCTTCTTCATTTTCAGATCTG  
AATCTGTTAATTATCCTCTT

In100 candidate2617 (in intron):

LOCUS ENSG00000132305

DESCRIPTION Mitochondrial inner membrane protein (Mitofilin) (p87/89)  
(Proliferation-inducing gene 4 protein). [Source:Uniprot/SWISSPROT;Acc:Q16891]

AGGATATCTTGTACTATTCCTGTAACCTTGTGTGTATTCCTTTTTTTCTCACCAGCCTTAAATTTTTTTCTTTTTTTT  
TCTTTTGAGACAGAGTCTCG

In100 candidate2618 (in intron):

LOCUS ENSG00000165995

DESCRIPTION Voltage-dependent L-type calcium channel subunit beta-2 (CAB2)  
Calcium channel voltage-dependent subunit beta 2) (Lambert-Eaton  
myasthenicsyndrome antigen B) (MYSB). [Source:Uniprot/SWISSPROT;Acc:Q08289]

GGTACCTTTGTTATAATTAATGAACTAATACTGATATACTAACCAACTAAAGTCCATACTTTATTCAAATTTCTCAGTT  
TTTCCTTAAGTTACTTTTAC

In100 candidate2619 (in intron):

LOCUS ENSG00000165995

DESCRIPTION Voltage-dependent L-type calcium channel subunit beta-2 (CAB2)  
Calcium channel voltage-dependent subunit beta 2) (Lambert-Eaton  
myasthenicsyndrome antigen B) (MYSB). [Source:Uniprot/SWISSPROT;Acc:Q08289]

ATTACCACCATTTTATAACCATGCCAATTGCTGTGTATTTTTTTAAATCTGTTTTCTATTTGCTTCTCTGAACTCAGTT  
CCTATCTTTGGAGCTTTCTA

In100 candidate2620 (in intron):

LOCUS ENSG00000165995

DESCRIPTION Voltage-dependent L-type calcium channel subunit beta-2 (CAB2)

Calcium channel voltage-dependent subunit beta 2) (Lambert-Eaton

myasthenicsyndrome antigen B) (MYSB). [Source:Uniprot/SWISSPROT;Acc:Q08289]

ATAAGTTAACTTCTGTTTTTTGTTTTTTAACTTTTAAGTTCCTATCACCCAGGTATTAAGACTAGTACTCACCAGTTATT

TTTTCCTGATTCTCTTCTTC

In100 candidate2621 (in intron):

LOCUS ENSG00000144935

DESCRIPTION Short transient receptor potential channel 1 (TrpC1) (TRP-1

proein). [Source:Uniprot/SWISSPROT;Acc:P48995]

CTACTGGTTTTCTATCAATTTCTGGCAAGAGAGTATTAAGATTTCTAACAATTGCTCCATTATCTTTTTCTGTGTCAGTT

TTTGCTTTGTATATTTTCAG

In100 candidate2622 (in intron):

LOCUS ENSG00000135090

DESCRIPTION Serine/threonine-protein kinase TAO3 (EC 2.7.11.1) (Thousand an

one amino acid protein 3) (Jun kinase-inhibitory kinase) (JNK/SAPK- inhibiory

kinase) (Dendritic cell-derived protein kinase) (Cutaneous T-cell lymphma tumor

antigen HD-CL-09) (CTCL tumor [Source:Uniprot/SWISSPROT;Acc:Q9H2K8

ATTCTTTGTAGTAATACAATAGAAATGTAATTTCTAACCCCTAATCCTTGTTTGTTTTGATCTTTCAGGGTCTTCTTTT

TACTGTACAGAGTTATTTTT

In100 candidate2623 (in intron):

LOCUS ENSG00000115548

DESCRIPTION JmjC domain-containing histone demethylation protein 2A (EC 1.1.11.-) (Jumonji domain-containing protein 1A).

[Source:Uniprot/SWISSPROT;Ac:Q9Y4C1]

TTCAAGTTTGTGTTTATCGTTTGCTTATATTTACAATTTTAACATATATATTTGTATTCCTGCACAATATTCTTTCAGTT  
TTTAGCCTGCTTTTGAACCT

In100 candidate2624 (in intron):

LOCUS ENSG00000154975

DESCRIPTION Carbonic anhydrase-related protein 10 (Carbonic anhydrase-related protein X) (CARP X) (CA-RP X) (Cerebral protein 15).

[Source:Uniprot/SWISPROT;Acc:Q9NS85]

TCCCACTCTGTGGGTTGTCTATTAACCTCTGCTGATTTATTTCTTTTGCTGTGCAGAAGCTTTTATAGTTTAATTAAGTCCC  
ATCTGTTTATCTTTGTTTTT

In100 candidate2625 (in intron):

LOCUS ENSG00000122735

DESCRIPTION Dynein intermediate chain 1, axonemal (Axonemal dynein intermediate chain 1). [Source:Uniprot/SWISSPROT;Acc:Q9UI46]

GCCTCTCTATTTCTCTTAACAACCTATGTTTCATTCTTATTCTTATTTCCCAACTGGCCAGATTTCATGGTCTCCGCTCC  
CTCATAATTTTAGTCTGTTT



In100 candidate2626 (in intron):

LOCUS ENSG00000181804

DESCRIPTION Sodium/hydrogen exchanger 9 (Na(+)/H(+) exchanger 9) (NHE-9)  
(Slute carrier family 9 member 9). [Source:Uniprot/SWISSPROT;Acc:Q8IVB4]

GCCTAAGTATACTCAATTTTATAAAATTAGATATAATCATTAACCTTGTCTTAATAATTTACTTTTCCATGCCCAGTATAC  
TTTATTTTATATATCACTTT

In100 candidate2627 (in intron):

LOCUS ENSG00000181804

DESCRIPTION Sodium/hydrogen exchanger 9 (Na(+)/H(+) exchanger 9) (NHE-9)  
(Slute carrier family 9 member 9). [Source:Uniprot/SWISSPROT;Acc:Q8IVB4]

TAAGTGTTGATTTTTTTTTGGTGTTTGATTTTTTTTTGGTGACCCATCCTAACTATGGCTGCTGCTTTTTTACTCCACAGGC  
CTTTTTTAATGTTTTTTCAT

In100 candidate2628 (in intron):

LOCUS ENSG00000181804

DESCRIPTION Sodium/hydrogen exchanger 9 (Na(+)/H(+) exchanger 9) (NHE-9)  
(Slute carrier family 9 member 9). [Source:Uniprot/SWISSPROT;Acc:Q8IVB4]

CATGCCCATTAACATTCTTTTACATTTTACCTTTCTATCTTTTTGTTTTTTAACCTGTGTTCTGGATGATTCCCTCAGAT  
CCTGTTCTAATTCTCGGTTG

In100 candidate2629 (in intron):

LOCUS ENSG00000181804

DESCRIPTION Sodium/hydrogen exchanger 9 (Na(+)/H(+) exchanger 9) (NHE-9)  
(Slute carrier family 9 member 9). [Source:Uniprot/SWISSPROT;Acc:Q8IVB4]

AATAAGACTCAAGGACAATTCTGTTGCCTAAAGGCAACCACTGTAACCTGCTAATATTTTGACATTTTTTTCCTTCCAGTC

TTTGTAGCTATTTTCATTTA

In100 candidate2630 (in intron):

LOCUS ENSG00000181804

DESCRIPTION Sodium/hydrogen exchanger 9 (Na(+)/H(+) exchanger 9) (NHE-9)  
(Slute carrier family 9 member 9). [Source:Uniprot/SWISSPROT;Acc:Q8IVB4]

TTCTCTTTTTCTTTTGTCAATTATTGGTCAAATAAATGTAAGTAGATATCATTTACTTTTCTTCTCTCACAGCCTGTGGA

TTTGTATTATTTTCATTCTTT

In100 candidate2631 (in intron):

LOCUS ENSG00000115561

DESCRIPTION Charged multivesicular body protein 3 (Chromatin-modifying protein  
3) (Vacuolar protein sorting-associated protein 24) (hVps24) (Neuroendocrine  
differentiation factor). [Source:Uniprot/SWISSPROT;Acc:Q9Y3E7]

TAGAAAGTTAAAATCACCCCTGAAGTTCGACCACTTAGAGATAACCACCACAAACACTTTGGTGATCATCCTTTTCCAGAT

ATATTTCTCTCTGTTTTTGT

In100 candidate2632 (in intron):

LOCUS ENSG00000153561

DESCRIPTION Protein RMD5 homolog A. [Source:Uniprot/SWISSPROT;Acc:Q9H871]

CTTTTCCCTTAAAATTTAGTTCCACTAACCCATTTAATTCTTCATAGCTTAGTTTTTCTTTCTAATCATTTCTCAGTT

CTTCTCCTTTTTGAGACAG

In100 candidate2633 (in intron):

LOCUS ENSG00000105499

DESCRIPTION Cytosolic phospholipase A2 gamma precursor (EC 3.1.1.4) (cPLA2-  
gamma) (Phospholipase A2 group IVC). [Source:Uniprot/SWISSPROT;Acc:Q9UP65]

CACCCTACTCTGTGGAGTAACGATTCTTTCACCCCTTTGCTTTCTTAACAGACTTGCTTTCGCTTTGCACTGTGGACTCA  
CCCTGAATTCTTTCTTGAT

In100 candidate2634 (in intron):

LOCUS ENSG00000108924

DESCRIPTION Hepatic leukemia factor. [Source:Uniprot/SWISSPROT;Acc:Q16534]

EXON

ATTAATATACGATTGTTGTAAATAGGACTGTATAAAGAGTAACTTGAGTTCCCATATTCCATTTCCAGATTTAACTGTC  
CACAGTTTCTGCGTACTCTT

In100 candidate2635 (in intron):

LOCUS ENSG00000114698

DESCRIPTION Phospholipid scramblase 4 (PL scramblase 4) (Ca(2+)-dependent  
pospholipid scramblase 4) (TRA1) (Cell growth-inhibiting gene 43 protein).  
[ource:Uniprot/SWISSPROT;Acc:Q9NRQ2]

TGTAGATTACTAAGAATGGAGTGTAAGTCCTCAACTGTAAGTGTGGATTTCTCTTTATTTTTTTCAATTTTGCCAGTT  
TTTCCTTCATGTATTTTGAA

In100 candidate2636 (in intron):

LOCUS ENSG00000105483

DESCRIPTION Caspase recruitment domain-containing protein 8 (Apoptotic protin  
NDPP1) (DACAR) (CARD-inhibitor of NF-kappa-B-activating ligand) (CARDINA)

(Tumor-up-regulated CARD-containing antagonist of CASP9) (TUCAN).

[Source:Uniprot/SWISSPROT;Acc:Q9Y2G2]

GGGAGGCCCCGTCTCAAAGAAAAAAGATTCTTTCTCTAACTTACTGGTTTATCTTACTTTTGTAGCTTATTTTCAGGT  
GATTCGTTATGTTTCTCTAT

In100 candidate2637 (in intron):

LOCUS ENSG00000204740

DESCRIPTION Novel protein (Fragment). [Source:Uniprot/SPTREMBL;Acc:Q5VYJ5]

EXON

TCATGACTCTAGTATCTCTGTTATTGTCATCATCATTGTTAACTGTTAATTCTCTCTCAATTTCAAATTCTGTCAGCT  
CTCTTTCTCAGCTGATTATA

In100 candidate2638 (in intron):

LOCUS ENSG00000120594

DESCRIPTION Plexin domain-containing protein 2 precursor (Tumor  
endothelialmarker 7-related protein). [Source:Uniprot/SWISSPROT;Acc:Q6UX71]

TAACTTCTGACCTCATTTCTTTCTTGCTGATCTGCCATGCAGTCTTCTTCCTATGCAATGGCAAGACATCTGTGATTGCT  
TCTCTTTTATGTCTTTCTCT

In100 candidate2639 (in intron):

LOCUS ENSG00000120594

DESCRIPTION Plexin domain-containing protein 2 precursor (Tumor endothelialmarker 7-related protein). [Source:Uniprot/SWISSPROT;Acc:Q6UX71]  
AGATTTTCTCTCACTCTGTGGGTGTCGGTAACTCTGCTGATTATTTCTTTTGCTGTGCAGAAGCTTTTATGTTTATTT  
AAGTCCCACCTATTTATTTT

In100 candidate2640 (in intron):

LOCUS ENSG00000120594

DESCRIPTION Plexin domain-containing protein 2 precursor (Tumor endothelialmarker 7-related protein). [Source:Uniprot/SWISSPROT;Acc:Q6UX71]  
AAGTTCCTTATACATTTTGGATATGAGACCCAAGGATAACTTTGACATAAGCTTTTTTCACTTGTTTTCCCTCCAGAT  
TATTATTCATTTTTTTCACCA

In100 candidate2641 (in intron):

LOCUS ENSG00000120594

DESCRIPTION Plexin domain-containing protein 2 precursor (Tumor endothelialmarker 7-related protein). [Source:Uniprot/SWISSPROT;Acc:Q6UX71]  
CCTCTCCTAACCTTGCTCTCTAGTTCATCAATCTTTCTATTTTTCTCCAGTTTTTCAGGATCTCTGCATGTTACAATT  
ATCTTTGTTTCGTTTTGTTT

In100 candidate2642 (in intron):

LOCUS ENSG00000184943

DESCRIPTION MGC4677 protein (Hypothetical protein tmp\_locus\_54) (Hypothetical protein MGC4677). [Source:Uniprot/SPTREMBL;Acc:Q969Y7]  
TGTGTCGTTTATATTATGGAACATTTAACTTTTAAGTAGTTATTATTTTCCTTTTAACACCCAGGTTTTGTCTTGCTTA  
GAAAGTCTGTTCTACCCCT

In100 candidate2643 (in intron):

LOCUS ENSG00000121064

DESCRIPTION Retinoid-inducible serine carboxypeptidase precursor (EC 3.4.16-)  
(Serine carboxypeptidase 1). [Source:Uniprot/SWISSPROT;Acc:Q9HB40]

AGAAATTTTGTTGTATAGAAATATAACAAGTTTCTGTTCTCACCTCCATCATTGTTTCTTTTGTACAGTCTCTGGGGTTT  
GCTTAGATTCTTTCCTCATC

In100 candidate2644 (in intron):

LOCUS ENSG00000185304

DESCRIPTION RANBP2-like and GRIP domain containing 2  
[Source:RefSeq\_peptideAcc:NP\_001071638]

CTAAATTTCTTCATCTTTCTGTCATATTTGCTAACCTCTCTCTTTTGGTTATCTCATCCTTTATTTATCCAACCTTCAGAT  
ATTCTTGTTACCTCTTATG

In100 candidate2645 (in intron):

LOCUS ENSG00000078114

DESCRIPTION Nebulette (Actin-binding Z-disk protein).  
[Source:Uniprot/SWISSROT;Acc:O76041]

GTAGGGTATCCTCATCCAAATTGTAACCGATTTCCCCTCCTGCTTGATTACATTCTGCATTTCTTTTGCTCTTGGCAGGA  
TTATATCATCATTTTATTCT

In100 candidate2646 (in intron):

LOCUS ENSG00000078114

DESCRIPTION Nebulette (Actin-binding Z-disk protein).

[Source:Uniprot/SWISSROT;Acc:O76041]

CATGGATTGAAAACAATAACATATGGAAATGTTGTCTCTTTCCACATTGCTTTTATTGGTTTTCTGCAGTCCTGTGCTT  
TTCTCCAGCTGGGTTGCTTT

In100 candidate2647 (in intron):

LOCUS ENSG00000078114

DESCRIPTION Nebulette (Actin-binding Z-disk protein).

[Source:Uniprot/SWISSROT;Acc:O76041]

GAGTCTAGGTTTTTAACCACACACTATGCTATATTTTCCTACCATTCTAACCCTCTTTTTCTTGTTAAGCAAGCAGTT  
TACTTCTTTCCCCAGAATTT

In100 candidate2648 (in intron):

LOCUS ENSG00000105464

DESCRIPTION Glutamate [NMDA] receptor subunit epsilon 4 precursor (N-methylDaspartate  
receptor subtype 2D) (NR2D) (NMDAR2D) (EB11).

[Source:Uniprot/WISSPROT;Acc:O15399]

AGGTGTGAGCCACCATGCCTGGTCTATTTTCTTGAGGTTAGTAACTGTCTTTTTTCTTTTCTTTCCTTTTTCAGTTGC  
TTCATGGCTGTGTTTTCTTT

In100 candidate2649 (in intron):

LOCUS ENSG00000180891

DESCRIPTION CUE domain-containing protein 1.

[Source:Uniprot/SWISSPROT;Acc:9NWM3]

GATTATAACAAATTTTTATTACAATTATTTTATTTTATTTTTGGCTTCTCATGCTTATTCCTACCTAGGCAGAATT  
TAGATTTATTTTTTAGTTTT

In100 candidate2650 (in intron):

LOCUS ENSG00000181355

DESCRIPTION MRDS1 [Source:RefSeq\_peptide;Acc:NP\_694548]

AGTCCTTTATTTTATGAGTGCAAAAATACAATACACCTAACAAGTATTCAAGTCCTAGTTTGTTGGTTTTTCAGCCCTTT  
TTTTTTTTTTTTTCAGAGAA

In100 candidate2651 (in intron):

LOCUS ENSG00000181355

DESCRIPTION MRDS1 [Source:RefSeq\_peptide;Acc:NP\_694548]

TACCTCTATCATTTGGTGAAAGGGGAATGTTGAAATCCTTAACTAGAATTTGTAATTTTTCGATTCTTCTTTCATCAGTA  
TCAGTTTTTACTTTACTCAT

In100 candidate2652 (in intron):

LOCUS ENSG00000181355

DESCRIPTION MRDS1 [Source:RefSeq\_peptide;Acc:NP\_694548]

AGCGTAGAATACTGTATATCATAACATTTGATGCCCTTTTTTTTTTGCTTTTTTTCTTCCAGATGCTCCAAGATTTCTCT  
GTTTATCATTTTCCTTTCTGT

In100 candidate2653 (in intron):

LOCUS ENSG00000101463



DESCRIPTION UPF0338 protein C20orf39.

[Source:Uniprot/SWISSPROT;Acc:Q9H7V2]EXON

TATTGTCCATCCTTCTTCCTAACAAATACAAGGAGTTTAGAATCCCCTTGCTTCTTATGCTATTGTTCTGTATTTTCAGTT  
CCTTCTAACTTTTGTTCAG

In100 candidate2654 (in intron):

LOCUS ENSG00000204683

DESCRIPTION Putative uncharacterized protein C10orf113.

[Source:Uniprot/SWISPROT;Acc:Q5VZT2]

GTAGGGTATCCTCATCCAAATTGTAACCGATTTCCCCTCCTGCTTGATTACATTCTGCATTTCTTTTGCTCTTGGCAGGA  
TTATATCATCATTTTATTCT

In100 candidate2655 (in intron):

LOCUS ENSG00000204683

DESCRIPTION Putative uncharacterized protein C10orf113.

[Source:Uniprot/SWISPROT;Acc:Q5VZT2]

CATGGATTTGAAAACAATAACATATGGAAATGTTGTCTCTTTCCACATTGCTTTTATTGGTTTTCTGCAGTCCTGTGCTT  
TTCTCCAGCTGGGTTGCTTT

In100 candidate2656 (in intron):

LOCUS ENSG00000101474

DESCRIPTION Adipocyte plasma membrane-associated protein (BSCv protein).

[Source:Uniprot/SWISSPROT;Acc:Q9HDC9]

GATATGATCATGTGATTATTCTTGTTTAGATTGTTGAAGTCTCTAACTGTGATAGTGGATTCTGTTTCTCCTTGCAGTTT  
CATCAGTTTTTGCCTCACAT

In100 candidate2657 (in intron):

LOCUS ENSG00000078403

DESCRIPTION Protein AF-10. [Source:Uniprot/SWISSPROT;Acc:P55197]

AGTACTCGGATTGTACCTTTTTTTTTTTTTTTTTTTTTTTTTTTTACATAACACAAATAACTTTTTTATTTCTGTACAGGC  
TTTTTAGCCTGTACACTTTA

In100 candidate2658 (in intron):

LOCUS ENSG00000078403

DESCRIPTION Protein AF-10. [Source:Uniprot/SWISSPROT;Acc:P55197]

GAAGACCCATTAAGTGCCTAGTTGACCGTACAATTTTTCATTTTTCGACTTTCCTCAGATCCCATTAATTGGCCTGTGAG  
GCCTTTAATTTTCCTCTTCT

In100 candidate2659 (in intron):

LOCUS ENSG00000078403

DESCRIPTION Protein AF-10. [Source:Uniprot/SWISSPROT;Acc:P55197]

CTTCTTCTCTTTTCTTCTCTTCCCTGTATTCCCATTTTAACTATGTCATGTGTTTTGTATATGTCCCAGCATTCATGGAT  
ATTTTGTTTGCTTTTGTTTT

In100 candidate2660 (in intron):

LOCUS ENSG00000078403

DESCRIPTION Protein AF-10. [Source:Uniprot/SWISSPROT;Acc:P55197]

AGGAAGTTAACTTCAACTCTACCCTCTCATTTTCCTAGTCATCATTTTTTTTAAAAAGCTTTTTTCTATTATTGATCAGTT  
TAACTTCTTTTTCTTTTGTA

In100 candidate2661 (in intron):

LOCUS ENSG00000082996

DESCRIPTION RING finger protein 13. [Source:Uniprot/SWISSPROT;Acc:043567]

ATAGAAACAAAGGAAAATGAAAAAAATCTTCTACACTTTAACTGTGTCCCTCATATTTTGGCTTTTAGTTGTCTCAGTT  
CACATATTTTTATATTACCT

In100 candidate2662 (in intron):

LOCUS ENSG00000082996

DESCRIPTION RING finger protein 13. [Source:Uniprot/SWISSPROT;Acc:043567]

ATCATATCATAATAACTCTTTTTCTTTCTGTCTTTTTTTTTTTTTTTTTTTTTTTGGTGATTTTTTTGTTATCTCAGAAAGTA  
GCCCTCTAGTTTTTCCTTTCT

In100 candidate2663 (in intron):

LOCUS ENSG00000082996

DESCRIPTION RING finger protein 13. [Source:Uniprot/SWISSPROT;Acc:043567]

TTGTTCTTGAGTTATAGGAGTTCTTTGTATATTCTAGATAACATGATTGCAAATATTTTTTCCCATCTGTCTCAGTTGTC  
ACTTTCTTGATAATGTCCTT

In100 candidate2664 (in intron):

LOCUS ENSG00000111846

DESCRIPTION N-acetyllactosaminide beta-1,6-N-acetylglucosaminyltransferase(  
EC 2.4.1.150) (N-acetylglucosaminyltransferase) (I-branching enzyme)  
(IGNT. [Source:Uniprot/SWISSPROT;Acc:Q06430]

TGTATGGTTAGTGGGGTACACTGTTTCCTGTGTATCCCTCTAACCATTAAAGTTCCTTGTTTTTCATCTCTTCTCCAGAC

TGAATATTCTGTTTCCTCTA

In100 candidate2665 (in intron):

LOCUS ENSG00000157837

DESCRIPTION Signal peptide peptidase-like 3 (EC 3.4.23.-) (SPP-like 3 proten)  
(Intramembrane protease 2) (IMP2) (Presenilin-like protein 4).

[Source:Uiprot/SWISSPROT;Acc:Q8TCT6]

TTCTGCTGCCTTTCTGAAATAACCTACTATTCTGGGTTTTCTTCTCTGTCTCTCTTTCATCTTGGTTTTCTTTGCAGTT  
CCTTCTTCTACCTGATCTTT

In100 candidate2666 (in intron):

LOCUS ENSG00000157837

DESCRIPTION Signal peptide peptidase-like 3 (EC 3.4.23.-) (SPP-like 3 proten)  
(Intramembrane protease 2) (IMP2) (Presenilin-like protein 4).

[Source:Uiprot/SWISSPROT;Acc:Q8TCT6]

ACCTAATATACATTATCATAGTACCCTATACTTCTCTTTCTCTCTTTTGTAACATTCTTCATGATTATATTCATTCAGTT  
ATGTTTCATTTTTTTTATTTCT

In100 candidate2667 (in intron):

LOCUS ENSG00000113240

DESCRIPTION Dual specificity protein kinase CLK4 (EC 2.7.12.1) (CDC-like  
kiase 4). [Source:Uniprot/SWISSPROT;Acc:Q9HAZ1]

TTATTAGTCATTTGGGCAAGCTGAATGAGGTAACTGAGTGGGTTTTACTCCATTTTAGCTTTTTTCAGCTCCTTGCTGA  
ATTGTGAAATTCTTCTCTTT

In100 candidate2668 (in intron):

LOCUS ENSG00000136770

DESCRIPTION DnaJ homolog subfamily C member 1 (DnaJ protein homolog MTJ1).  
Source:Uniprot/SWISSPROT;Acc:Q96KC8]

TCCTTAATTTAAAAATGTTTATTAGCCTGTCTTGTAAC TGAGAATTCCTGCTTCTATTTGGTTTCTGGTTCCAGTGCTA  
TTTTTAAATTTTTTGGTTTT

In100 candidate2669 (in intron):

LOCUS ENSG00000136770

DESCRIPTION DnaJ homolog subfamily C member 1 (DnaJ protein homolog MTJ1).  
Source:Uniprot/SWISSPROT;Acc:Q96KC8]

CCTTTTGATGTCTACATGCCCTGTAGTGATTCTCCTTTTAAATATAGGTAAC TTTTGTCTTCTGTTTCCTTTGTCAGAT  
TCGCCAGTTGTTGATCTTTT

In100 candidate2670 (in intron):

LOCUS ENSG00000178338

DESCRIPTION zinc finger protein 354B [Source:RefSeq\_peptide;Acc:NP\_478137]  
EXON

CTGCTCCATTCTCTTGGTCACTCTTACACACTCACCCGCCTTAACTGAGTTTGTTTTATTCATTTGTTCACTTATCAGTT  
CAGCTGTCATCCATTATTTT

In100 candidate2671 (in intron):

LOCUS ENSG00000197586

DESCRIPTION Ectonucleoside triphosphate diphosphohydrolase 6 (EC 3.6.1.6)  
(TPDase 6) (CD39 antigen-like 2). [Source:Uniprot/SWISSPROT;Acc:O75354]

AATTTTGCATTTTGCTAACGATTCATGATGTTGAGCCTCTTTTGTATGCTTTTATCTGTTATTTTTTAAACAGATTGC  
TATTTTGTGGTTGACTTTT

In100 candidate2672 (in intron):

LOCUS ENSG00000178187

DESCRIPTION Zinc finger protein 454. [Source:Uniprot/SWISSPROT;Acc:Q8N9F8]

EXON

TGATAACTCTGGTATCTGTGTTCTACGGTTCTTTTTCTATTGTCTGTTTTCCCTCTTCATTGAATTTCTTAGCACAGCT  
GGCCTTTTTTATTGTATCCC

In100 candidate2673 (in intron):

LOCUS ENSG00000111837

DESCRIPTION Serine/threonine-protein kinase MAK (EC 2.7.11.22) (Male germ  
cell-associated kinase). [Source:Uniprot/SWISSPROT;Acc:P20794]

GTGCTTCCTTGTGAATAGATGCTGAATATAATGCTTTGTAACATAGTTTTTCTACTTTTTTCTTAATATATCAGATGGC  
ACTTATTTCCATATCTATTC

In100 candidate2674 (in intron):

LOCUS ENSG00000147117

DESCRIPTION Zinc finger protein 157 (Zinc finger protein HZF22).

[Source:Unprot/SWISSPROT;Acc:P51786]

GAAGCAATGCTTTGTGGAATACCATGATGGTGGATTTTCCTTTGTTGCATAACCCATGTATTCATTCCTTTACTTTCAGCT  
ATTATTTCTTTTTTTTATTTTC

In100 candidate2675 (in intron):

LOCUS ENSG00000121101

DESCRIPTION Testis-expressed protein 14 (Testis-expressed sequence 14)

(Protein kinase-like protein SgK307) (Sugen kinase 307).

[Source:Uniprot/SWISSPROT;Acc:Q8IWB6]

GCCCTTTCCTTTTCAAAGCTAACAATTTAGCATCTTCTGACTTTTCTTCTGTCTTTATATCTTTTTGTGGACCTCCAGAG  
TCCTTCTGTTTTTTTTTCTTT

In100 candidate2676 (in intron):

LOCUS ENSG00000110931

DESCRIPTION Calcium/calmodulin-dependent protein kinase kinase 2 (EC

2.7.1117) (Calcium/calmodulin-dependent protein kinase kinase beta) (CaM-kinase  
kinase beta) (CaM-KK beta) (CaMKK beta). [Source:Uniprot/SWISSPROT;Acc:Q96RR4

CTGCTCCCTAAGAGTATTTGTTACTCACATTAACATTTTTTCTTCTTTCTTTTGCCTGCTTTGTTTTTCTGTCAGAT  
ATTTATTACTCTCATTTTAC

In100 candidate2677 (in intron):

LOCUS ENSG00000175175

DESCRIPTION protein phosphatase 1E [Source:RefSeq\_peptide;Acc:NP\_055721]

TATGTAATTATTATAACGTTAAATGTATTACTTTCTAATTCTTTTGCTGAAAATGGCCTTTTATCTTTTTTCTTGCAGTA

ATTGCCCTTCCTTTTTGGCT

In100 candidate2678 (in intron):

LOCUS ENSG00000135956

DESCRIPTION Transmembrane protein 127. [Source:Uniprot/SWISSPROT;Acc:O75204

TTTTTTTAAAATTGTGGTAAAATATACATAACATAAACTTAGCATTTTAACTTTTTTTTTTTTTTTTTTTTGAGACAGAG

TTTCTCTCTTGTTGCCCATG

In100 candidate2679 (in intron):

LOCUS ENSG00000100997

DESCRIPTION Abhydrolase domain-containing protein 12.

[Source:Uniprot/SWISSROT;Acc:Q8N2K0]

GCCAAATCATAACACGACAACTATTTTTTTATCTTCCAGTTTTTATGGTTATACTTTGTATTTTCTCTTGCCTTATTGTT

TTAACTTGCACTTCCAGAAT

In100 candidate2680 (in exon):

LOCUS ENSG00000205269

DESCRIPTION Novel protein. [Source:Uniprot/SPTREMBL;Acc:Q5T4T1]

TTTATATTCCTGATGTTTTTACAAATTAAATTTAGGCATAACTTTTCCAAGTCAATCTGATTTTTTCTTTTCTGCCAGAC

TTGAATTGTGTTCTTCTTTT

In100 candidate2681 (in intron):



LOCUS ENSG00000108406

DESCRIPTION Probable ATP-dependent RNA helicase DHX40 (EC 3.6.1.-) (DEAH box protein 40) (ARG147) (Protein PAD). [Source:Uniprot/SWISSPROT;Acc:Q8IX18]

EXON

TGTGTACCTGCTAGTTTGCTAGAAAAGGAGAAACCAAAGTGGTTAACAATTAACAAGTCTTCTTTTATTTTCCAGAACT  
TAACTTGCTTTGATTCTTCT

In100 candidate2682 (in intron):

LOCUS ENSG00000095951

DESCRIPTION Zinc finger protein 40 (Human immunodeficiency virus type I enhancer-binding protein 1) (HIV-EP1) (Major histocompatibility complex-binding protein 1) (MBP-1) (Positive regulatory domain II-binding factor 1) (PRDIIBF1). [Source:Uniprot/SWISSPROT;Acc:P15822]

TCCATTTTGTAAAAATTGAGTTATCTTTTCTTAATATATTTTGAATAACTATTCATTTTATGTGCTTTATTTTTCAGAT  
TTATTTTCTACTTCATTTAA

In100 candidate2683 (in intron):

LOCUS ENSG00000114982

DESCRIPTION CDNA FLJ10081 fis, clone HEMBA1002018.

[Source:Uniprot/SPTREMBL;Acc:Q9NWE5]

AGTTTAGAAAATAGAAGGAAAAAATAACCCCAACTCTCCCTACTCTAGCATAGTTCATCTTTTTCATTTTCCAGTTTTC  
GTCCGTAATATCTTGCATTT

In100 candidate2684 (in intron):

LOCUS ENSG00000101003

DESCRIPTION DNA replication complex GINS protein PSF1.

[Source:Uniprot/SWISPROT;Acc:Q14691]

AATAACTTTTTTGTCTCTCATTTTCCTTCATTATTGCCTTCTTCAGTATTTAGTTGATTTTTTGAAACATTTAGATTTCTT  
TCTCATTTTCCTCATTACCCC

In100 candidate2685 (in intron):

LOCUS ENSG00000062716

DESCRIPTION transmembrane protein 49 [Source:RefSeq\_peptide;Acc:NP\_112200]

EXON

ACCACTATGCGGTATTGTTCTTTTTTCGTAACTTTGCCTAGTGTGTCATTTCTTCCCATCTGCATGTCTACTTTTTCAGTT  
TTCTTACCTTTCAATTTATG

In100 candidate2686 (in intron):

LOCUS ENSG00000101004

DESCRIPTION Ninein-like protein. [Source:Uniprot/SWISSPROT;Acc:Q9Y2I6]

GGCTTCATGGTATATGAGAAGTCTGATGTAATACTTAACTTTGCTCCTAAGGGTTTTTTTTTCTTCTGGCTTCTTTCAGGT  
TTCTCTTTGTTTTGGGTTCC

In100 candidate2687 (in intron):

LOCUS ENSG00000108443

DESCRIPTION Ribosomal protein S6 kinase beta-1 (EC 2.7.11.1) (Ribosomal  
proein S6 kinase I) (S6K) (S6K1) (70 kDa ribosomal protein S6 kinase 1) (p70 S

kinase alpha) (p70(S6K)-alpha) (p70-S6K) (P70S6K) (p70-alpha).

[Source:Unirot/SWISSPROT;Acc:P23443]

GTGTGTGTGTGTTTTTTCTTTTTAGTATATTATGAACTTATATGTTTTAACACATTTGTGTTTCATTTTCATCGCAGTT  
ATTTTTATTTTATTTTATT

In100 candidate2688 (in intron):

LOCUS ENSG00000112137

DESCRIPTION Phosphatase and actin regulator 1.

[Source:Uniprot/SWISSPROT;Ac:Q9C0D0]

TGTGTGTGTTTTTCGTTTTAACTCGACGTTTTGCTTGATGTTTAAACCTCTTTTGCTTGTTTTTTCTTTCATTGCTCAGGT  
AAGTGTTACCTTCCATTTTT

In100 candidate2689 (in intron):

LOCUS ENSG00000112137

DESCRIPTION Phosphatase and actin regulator 1.

[Source:Uniprot/SWISSPROT;Ac:Q9C0D0]

ATTCTCTGTAACCTCTGTCACCTTCACATACTGTATCATCCTCTTAATCTTTTGTTCTCTTCTTACACTCAGCATATCAC  
CATGGACTTTTTCTATCCTT

In100 candidate2690 (in intron):

LOCUS ENSG00000174953

DESCRIPTION Probable ATP-dependent RNA helicase DHX36 (EC 3.6.1.-) (DEAH box protein 36) (MLE-like protein 1) (RNA helicase associated with AU-rich element ARE). [Source:Uniprot/SWISSPROT;Acc:Q9H2U1]

CCTGACAACTGAAATTAGCCACTCATTTTCACTTCAAAAAAGGAGGTAACATATAGTTCATTTGCTTTGCTTCTTCAGGT  
TTGTTGTTTTATCACTGATT

In100 candidate2691 (in intron):

LOCUS ENSG00000113269

DESCRIPTION Goliath homolog precursor (RING finger protein 130).

[Source:Unprot/SWISSPROT;Acc:Q86XS8]

GGTAATTTAGATAAACATGTAACCAAATAATAATGTTGCTTTTAAATCTTTTATCAATCAGCAATATCAGATGCTTCTT  
ACTGGGTTTTTCTTTTTTTT

In100 candidate2692 (in intron):

LOCUS ENSG00000131620

DESCRIPTION transmembrane protein 16A

[Source:RefSeq\_peptide;Acc:NP\_060513]EXON

TTGAGTTTTTAACTCTTTTTATGATCTTTTTTATTTCTAGGAGTTCTATTTGGTTCTTTTCCAAGTCAGCTATGTCATGT  
TTTAATAGTTTCCTGTCCTT

In100 candidate2693 (in intron):

LOCUS ENSG00000158023

DESCRIPTION WD repeat domain 66 [Source:RefSeq\_peptide;Acc:NP\_653269]

GATTGTCTAATAACCCCAATGCTCGGATCTCCTGTGGCTTCTTTCTGCTGATTGCTTTTTCCCCTTGGTTTTTCAGTCATT  
TGGATGGGTCTTTTTTCTTT

In100 candidate2694 (in intron):

LOCUS ENSG00000174948

DESCRIPTION Probable G-protein coupled receptor 149 (G-protein coupled  
recetor PGR10). [Source:Uniprot/SWISSPROT;Acc:Q86SP6]

GATTTTTTTTCCCATGCTGTGGCTTGTCTGTTAACCTCTGCTGATTATTTCTTCACTGTGCAGAAGTTTTTTAGCTTACTT  
AAGTCCCATCTATTTATCTT

In100 candidate2695 (in intron):

LOCUS ENSG00000174948

DESCRIPTION Probable G-protein coupled receptor 149 (G-protein coupled  
recetor PGR10). [Source:Uniprot/SWISSPROT;Acc:Q86SP6]

ATTGATCTGTTAATAAAATAACTTTTTGTTTCATTAATTTCTCTTTGTTTTCTGTTTTCAATGTCATTGATATCAGCT  
TTTATCTATTTTCCTCCTTT

In100 candidate2696 (in intron):

LOCUS ENSG00000068097

DESCRIPTION amplified in breast cancer 1 (ABC1), mRNA  
[Source:RefSeq\_dna;Ac:NM\_022070]

TGTCTTATAGAATGTGAACTCTAAGCTCTGTCACCAAAGATAACAAAATAAATCACATTCTCAATTTGTCAGATTGTTTC  
TTTATGGTGTTAACCTACTC

In100 candidate2697 (in intron):

LOCUS ENSG00000170832

DESCRIPTION Ubiquitin carboxyl-terminal hydrolase 32 (EC 3.1.2.15) (Ubiquitin  
thioesterase 32) (Ubiquitin-specific-processing protease 32) (Deubiquitinating  
enzyme 32) (Renal carcinoma antigen NY-REN-60).

[Source:Uniprot/SWISSPOT;Acc:Q8NFA0]

ATTTAACCAAAAAAGAAGTGTAATGCTTGCCAATTTTCTTTTTTTTCTTTTTATTTATTTATTTTTTTGAGACAGAGT  
TTCGCTCTGTTGTCCATGCT

In100 candidate2698 (in intron):

LOCUS ENSG00000170832

DESCRIPTION Ubiquitin carboxyl-terminal hydrolase 32 (EC 3.1.2.15) (Ubiquitin  
thioesterase 32) (Ubiquitin-specific-processing protease 32) (Deubiquitinating  
enzyme 32) (Renal carcinoma antigen NY-REN-60).

[Source:Uniprot/SWISSPOT;Acc:Q8NFA0]

TTTTCTTGTTTTTGAATTAAACTTAAACACAACCTGCTTTTTTGTCTTCTGTCCTATTACTATCTGTCTTACCTTCAGAC  
TTTTACACATCCTGTTTTAC

In100 candidate2699 (in intron):

LOCUS ENSG00000114805

DESCRIPTION phospholipase C-like 3 [Source:RefSeq\_peptide;Acc:NP\_055811]

TTGCCAAACCTTTGCCTCTTTTATCCCTCCTAACTTCTCTTAGTATAATTATTTTTTTCATTCTTTTTCTATACTCAGAAT  
CACTCCTCCTATGTTTTGAT

In100 candidate2700 (in intron):

LOCUS ENSG00000114805

DESCRIPTION phospholipase C-like 3 [Source:RefSeq\_peptide;Acc:NP\_055811]

TCTTCATGAGTTTAATAACCATTTGCAAGCAATTTTCACCGTCTGCTTTGCAGATGTTGCTGCCAACTCATTTTCAGCCAA  
GTCCTTTGCTTTTCTGATTT

In100 candidate2701 (in intron):

LOCUS ENSG00000114805

DESCRIPTION phospholipase C-like 3 [Source:RefSeq\_peptide;Acc:NP\_055811]

AGATGTATTGTAACCTCTATTGTATGTTATTTATTTTCTCTTGCTGCTTTTAGGATTTTTTTTTTTTTTTGAGACAGAGTTT  
TGTCTTATCACCCATGCTG

In100 candidate2702 (in intron):

LOCUS ENSG00000145990

DESCRIPTION glucose-fructose oxidoreductase domain containing 1

[Source:RefSeq\_peptide;Acc:NP\_061861]

TTTATCTGACTTGCTAACAAATCTGTGTCATTCTTTTTTTTTTTTTTTCTTGCCCTCCAGTTGGCTGTTTCTCCAGGTCCA  
GCTGAGTTGTTTTTCTTCTT

In100 candidate2703 (in intron):

LOCUS ENSG00000174501

DESCRIPTION KIAA1641 (KIAA1641), mRNA [Source:RefSeq\_dna;Acc:NM\_025190]

CTTATGCAATCACATAACTATGTTTTTTTTTTTTTTTTTTTTTTTTTTTACAGGACCTATCTGAGTTTATAACTGTCA  
CCTTTTTATCTTGTTCTTC

In100 candidate2704 (in intron):

LOCUS ENSG00000113300

DESCRIPTION CCR4-NOT transcription complex subunit 6 (EC 3.1.--) (Cytoplasmic  
deadenylase) (Carbon catabolite repressor protein 4 homolog) (CCR4 carbo  
catabolite repression 4-like). [Source:Uniprot/SWISSPROT;Acc:Q9ULM6]

GTTTTCTCTGGTAACCCAAATTGCATCCCTCCTTTTTGTTTTTCAGCACTAATCGCTATTTTCTTTGGAAACTTCCTTG  
ATTCTTTACCTCCTTCACCT

In100 candidate2705 (in intron):

LOCUS ENSG00000062725

DESCRIPTION Amyloid protein-binding protein 2 (Amyloid beta precursor  
protenbinding

protein 2) (APP-BP2) (Protein interacting with APP tail 1).

[Souce:Uniprot/SWISSPROT;Acc:Q92624]

GGGCAATATCAAAACCAAGAAATTGACACTGGTGTTATACCATTAAGTAGACTACTGGCCTTACTTAGTTTTTCACCAGTT  
TTTACGTGCACTCATTTGTT

In100 candidate2706 (in intron):

LOCUS ENSG00000062725

DESCRIPTION Amyloid protein-binding protein 2 (Amyloid beta precursor  
protenbinding

protein 2) (APP-BP2) (Protein interacting with APP tail 1).

[Souce:Uniprot/SWISSPROT;Acc:Q92624]

CAAATCTAGAAGTAACTCTGCTTTATTGTCCTTATTTTTTTCTGCATGTTACATTTACCTTTAGCTATTTTCATACAGGT  
TTTCTCTTTGTCCCCCAATT

In100 candidate2707 (in intron):

LOCUS ENSG00000198722



DESCRIPTION Unc-13 homolog B (Munc13-2) (munc13).

[Source:Uniprot/SWISSPROT;Acc:O14795]

TTTTTATACTTTTCTCATGTTTAACTTAATATTCTTTCTCATTGAGCTTCCTTTTGATTTTATCTGCCTCTCAGCAGT  
CTTCCTCAGTCTTCTGCTTT

In100 candidate2708 (in intron):

LOCUS ENSG00000196912

DESCRIPTION Ankyrin repeat domain-containing protein 36B.

[Source:Uniprot/SWISSPROT;Acc:Q8N2N9]

AAATTATCTTATGCAATCACATAACTATGTTTTTTTTTTTTTTTTTTTTTTTACAGGACCTATCTGAGTTTATAACTGTCA  
CCTTTTTATCTTGGTTCTTC

In100 candidate2709 (in intron):

LOCUS ENSG00000141376

DESCRIPTION Breast carcinoma amplified sequence 3 (GAOB1) (Maab1 protein).

Source:Uniprot/SWISSPROT;Acc:Q9H6U6]

TATCATTAATAAAATTTAATGTTTAATTTTAACTGGTCTGTTTTGCCTCTCTATTCTTCTGTATTCCTCTGCCAGCA  
GTTTCTGCACTTTTGTTATC

In100 candidate2710 (in intron):

LOCUS ENSG00000141376

DESCRIPTION Breast carcinoma amplified sequence 3 (GAOB1) (Maab1 protein).

Source:Uniprot/SWISSPROT;Acc:Q9H6U6]

AGATTTTCTCCCACTCTGTGGGTGTATGTAACTTGGCTAATTATTTCTTTTGCTGTGCAGAAGCTTTTATGTTTAATT  
AATCCCATCTATTTATCTT

In100 candidate2711 (in intron):

LOCUS ENSG00000141376

DESCRIPTION Breast carcinoma amplified sequence 3 (GAOB1) (Maab1 protein).

Source:Uniprot/SWISSPROT;Acc:Q9H6U6]

AGGAGGAGAAGAAAAGCTTATAGTATTTAACCATGTTTTTGCTTACTATGTTTTTTCTTCCTTCCTACTGTTCCACAGTT  
ACTTCTTCATTTGTTTTCCC

In100 candidate2712 (in intron):

LOCUS ENSG00000130779

DESCRIPTION CAP-GLY domain-containing linker protein 1 (Restin) (Cytoplasmic  
linker protein 170 alpha-2) (CLIP-170) (Reed-Sternberg intermediate  
filament associated

protein) (Cytoplasmic linker protein 1).

[Source:Uniprot/SWISSPROT;Acc:P30622]

AGAATTTAATGGTTCATTAACAATTTAATAGATATCTTCTTCACTCATTTTCATATACAGCCACATTCCTTTAGTCAATTT  
TTGTGTTGTTCTCATCCATT

In100 candidate2713 (in intron):

LOCUS ENSG00000162105

DESCRIPTION SH3 and multiple ankyrin repeat domains protein 2 (Shank2).

[Source:Uniprot/SWISSPROT;Acc:Q9UPX8]

TCCAAATTGGGCTCTGCTCCTCTTCTAACTGATCACATCTCTGCTTTGTTCTTTTGGTTCTCCTCCCAGTTGGATCACTC  
ATTTATTCCTGTGCTTATTT

In100 candidate2714 (in intron):

LOCUS ENSG00000179766

DESCRIPTION

AAGGTCTCTAACACCCCCATCAAGACCCTCTATTCTATTAACCTGTTTTATTTTCCTCACAGCATTTATCACTAAATGGT  
ATTTTTTTCATTTCTTGTTT

In100 candidate2715 (in intron):

LOCUS ENSG00000198853

DESCRIPTION RUN and SH3 domain-containing protein 2.

[Source:Uniprot/SWISSPOT;Acc:Q8N2Y8]

ATCTTATCTCTTAACTTCTCATTCACCTTTCTGTTTCCTTTGTTTTTTGTGCTGTTTCTATGTGATTTCTTCAGATCGAT  
CTTCCAGTTCACCTAATTTCT

In100 candidate2716 (in intron):

LOCUS ENSG00000198853

DESCRIPTION RUN and SH3 domain-containing protein 2.

[Source:Uniprot/SWISSPOT;Acc:Q8N2Y8]

TTTTTATTTTAATAATTATGTTTCTAACTTCTGAACATATTTTCGTTCTTTTTTCAGATCTGCCTGGTTATTTCTAATAATT  
CATTGCCACTCGCTTACCTT

In100 candidate2717 (in intron):

LOCUS ENSG00000010017

DESCRIPTION Ran-binding protein 9 (RanBP9) (RanBP7) (Ran-binding protein

M) (RanBPM) (BPM90) (BPM-L). [Source:Uniprot/SWISSPROT;Acc:Q96S59]

TTATTTTGATTGGGAAGTTTAACATTTTCTTCATTTTGCCCATCTGTCTTTTCTATGCTTATTTTCTTTCTTACAGTT  
TTTACTTGATTTTCAATTCA

In100 candidate2718 (in intron):

LOCUS ENSG00000172890

DESCRIPTION Glutamine-dependent NAD(+) synthetase (EC 6.3.5.1) (NAD(+) syntase [glutamine-hydrolyzing]) (NAD(+) synthetase 1).

[Source:Uniprot/SWISSPRT;Acc:Q6IA69]

TCTGTGTCTGCCTGCCTTATCTTTCATCTTCTTTCTAACCATCACTGTCTTCGTTTATTTGTATTTTTTTTCTGGCAGTT  
TCATTCCCCTGAATTTGTCT

In100 candidate2719 (in intron):

LOCUS ENSG00000136492

DESCRIPTION Fanconi anemia group J protein (EC 3.6.1.-) (ATP-dependent RNA elicase BRIP1) (Protein FACJ) (BRCA1-interacting protein C-terminal helicase 1) (BRCA1-interacting protein 1) (BRCA1-associated C-terminal helicase

1).[Source:Uniprot/SWISSPROT;Acc:Q9BX63]

GTTTTTAGTATTTACCTTGGGGATTATAACTATCATCTGAATCTCTGTTCCCTTTTTATATTGTTATTGTCACAGAT  
TCCATCTTTATACTTTGTGT

In100 candidate2720 (in intron):

LOCUS ENSG00000108510

DESCRIPTION Thyroid hormone receptor-associated protein complex 240 kDa  
comonent (Trap240) (Thyroid hormone receptor-associated protein 1) (Vitamin  
D3receptor-interacting protein complex component DRIP250) (DRIP 250)  
(Activatrrecruited  
cofactor 250 kDa component) [Source:Uniprot/SWISSPROT;Acc:Q9UHV]  
TTCTACCCATTTGTTGTATAAATTGTGCATATAAACCATGTGTAACCTCTTAATACATGTCTTTGCTTTTATTCAGAAGCT  
CATATTGTGTCTGTTTTTCT

In100 candidate2721 (in intron):

LOCUS ENSG00000108510

DESCRIPTION Thyroid hormone receptor-associated protein complex 240 kDa  
comonent (Trap240) (Thyroid hormone receptor-associated protein 1) (Vitamin  
D3receptor-interacting protein complex component DRIP250) (DRIP 250)  
(Activatrrecruited  
cofactor 250 kDa component) [Source:Uniprot/SWISSPROT;Acc:Q9UHV]  
CACTGCTTCTTAACAAGAATGATAAGGTTTTTGTTTGTTTTTGTGTTTAGTTATATTATTTTAGTTTTCTGTCAGTT  
ACATTAATTTTTATTTTATT

In100 candidate2722 (in intron):

LOCUS ENSG00000168658

DESCRIPTION CDNA FLJ25975 fis, clone TST07107.

[Source:Uniprot/SPTREMBL;AccQ8N770]

TCCATATGATGTATATAATGTATCTTTTTTCTATAACTGCTTTTAAGATTTTTCCTCTTTATTCTTGTTTTTCAGCTATT  
GATATGCCTTCTTTTGTTT

In100 candidate2723 (in intron):

LOCUS ENSG00000168658

DESCRIPTION CDNA FLJ25975 fis, clone TST07107.

[Source:Uniprot/SPTREMBL;AccQ8N770]

AGTGGGTCTTGCATTCTTCGTGGCTTTAACCAATCTGTTGCTGTGTTCTCCTCTTTCCAGTATATTATTTAGTCTCTCTG  
CATCTTTTCTTCTCCGTCTT

In100 candidate2724 (in intron):

LOCUS ENSG00000168658

DESCRIPTION CDNA FLJ25975 fis, clone TST07107.

[Source:Uniprot/SPTREMBL;AccQ8N770]

AGACTGTTCTCATAACCATTCGATTATGCTGGTTTTCTTCAGAGACTCATTTTATCTGTCTGGTGTATCTCCTTTAACAG  
TCTTCTACATCTATTATTTT

In100 candidate2725 (in intron):

LOCUS ENSG00000179133

DESCRIPTION Uncharacterized protein C10orf67.

[Source:Uniprot/SWISSPROT;AccQ8IYJ2]

ACTCCCGCTAGTAACTTTTGAGGATGTCTCTTTCCTACATATTTGCCAATTTATTGTCTTCTTTTATACTTTCAGAAACA  
TTTTATAATTTTATTCTTTC

In100 candidate2726 (in intron):

LOCUS ENSG00000179133

DESCRIPTION Uncharacterized protein C10orf67.

[Source:Uniprot/SWISSPROT;AccQ8IYJ2]

TTCCACAATGGTTGAACTAATTTGCATTCCCCTAACGTGTAAAAGTGTTCCCTATTTCTCTGCAGCCTCACCAGCATCTA  
TTGTTTCCTGACTTTTTTAAT

In100 candidate2727 (in intron):

LOCUS ENSG00000008083

DESCRIPTION Jumonji protein (Jumonji/ARID domain-containing protein 2).

[Source:Uniprot/SWISSPROT;Acc:Q92833]

TTTTTCTCTTTCTCTTTTAACTCCTGACTGTTTATTTTACTCCCTCTTCTATTTGATTTTCCCCAAAGTCTGTGTCAGGT  
TTAAGAACCTTCTTTCTGTC

In100 candidate2728 (in intron):

LOCUS ENSG00000120549

DESCRIPTION KIAA1217 (KIAA1217), mRNA [Source:RefSeq\_dna;Acc:NM\_019590]

AAATAATATGCATCTGATTTTGTCTGCAAACAAATAAAGAGAAGGCTAACCCATACTTACCTTCCTTTCATGGTTCAGAC  
TTTCCTGATATTTTATGCCC

In100 candidate2729 (in intron):

LOCUS ENSG00000120549

DESCRIPTION KIAA1217 (KIAA1217), mRNA [Source:RefSeq\_dna;Acc:NM\_019590]

AGTCTAACATCACACTTCACATCTTAATAGTCTCTCTTTCATCTTCATTTTCTTGTTTACAGTTTCAATACTTCTGTCTC  
TAGTTTTGTATTTATTTTAA

In100 candidate2730 (in intron):

LOCUS ENSG00000120549

DESCRIPTION KIAA1217 (KIAA1217), mRNA [Source:RefSeq\_dna;Acc:NM\_019590]

AGTGGCACCATCATAACTGTTTTTACTACATATTTTGAGTTTATTCTTTCCAGTTTTCTTTTTCCTTTCCTTAATTGCTG  
TAGCAGTGATTCATTTTCAGT

In100 candidate2731 (in intron):

LOCUS ENSG00000120549

DESCRIPTION KIAA1217 (KIAA1217), mRNA [Source:RefSeq\_dna;Acc:NM\_019590]

GTGTGTGTGTGTGTGTGTGTGTGTGTGTGTGAATAGGCTTTAACTATAAAATTCACCTCCTCTTATTATTGGTTAATTCAGAC  
TTTGTATTGCTTCTCATGTA

In100 candidate2732 (in intron):

LOCUS ENSG00000120549

DESCRIPTION KIAA1217 (KIAA1217), mRNA [Source:RefSeq\_dna;Acc:NM\_019590]

AAAGTATAACAAAGTCTCCCATATCATTGTATTTTTATCTTTTTCTCCCTGCGTTCCTAAGAATTTGTTTCACAGGTTTT  
TAGTTATGATCACACCTTCT

In100 candidate2733 (in intron):

LOCUS ENSG00000120549

DESCRIPTION KIAA1217 (KIAA1217), mRNA [Source:RefSeq\_dna;Acc:NM\_019590]

CCTCTTCATTCTGTTTAGTGTCTGTAACTTTTTAAAAATATTATCTCTCTTGATTTACATTTGTTTGCATCTGTCAGGT  
ATGCCTTATCATTCATTTTC

In100 candidate2734 (in intron):

LOCUS ENSG00000120549



DESCRIPTION KIAA1217 (KIAA1217), mRNA [Source:RefSeq\_dna;Acc:NM\_019590]

TTTCTTAAACAAAGAAGGTCTTGGTCAAGGTCTAGGAATGCTGTGTTAACCACACAAGTTTCTTTATTGCTCCAGAAC  
TACTCAACTTTTCTGGCTTT

In100 candidate2735 (in intron):

LOCUS ENSG00000137522

DESCRIPTION RING finger protein 121. [Source:Uniprot/SWISSPROT;Acc:Q9H920]

EXON

ATGATTTAAAAAATACTCCACCTACTCTGTTATAACACTTATAATGAATTGTGGTTGGTTCTTCTCCTCAGTAGACTTG  
AGTTCTTCTCATTTATTCTC

In100 candidate2736 (in intron):

LOCUS ENSG00000197415

DESCRIPTION ventricular zone expressed PH domain homolog 1

[Source:RefSeq\_pptide;Acc:NP\_078897]

TGTCTTTCGTTTTCTTGAAATAACGACCTTATTTTTCTTCTATTTTGCTTATATTTTCACTTAGTTTTTCATCAGTGGTT  
TTATATTTGGTTTCATCTTT

In100 candidate2737 (in intron):

LOCUS ENSG00000146872

DESCRIPTION Serine/threonine-protein kinase tousled-like 2 (EC 2.7.11.1)

(Tusled- like kinase 2) (PKU-alpha). [Source:Uniprot/SWISSPROT;Acc:Q86UE8]

AGCCTTCTACATCTCAATAACTGTCAACTTTTCTCCTTCTAATTGTTACAGCTAAAATCCTTGGAGTCATTCTTGTCCTTT  
CTCTTCTTTTTATATTATAT

In100 candidate2738 (in intron):

LOCUS ENSG00000142552

DESCRIPTION Reticulocalbin-3 precursor (EF-hand calcium-binding protein RLP9). [Source:Uniprot/SWISSPROT;Acc:Q96D15]

GCCCCTAGCGGGCAAAAAATTTAGTCAAGGAGAACGCTAACAAGGAATTTTTTTTTTTTTTTTTTTTTTTGAGACAGTT  
TTTTTCTGTTGCTCAGGCTG

In100 candidate2739 (in intron):

LOCUS ENSG00000174891

DESCRIPTION Arginine/serine-rich coiled coil protein 1.

[Source:Uniprot/SWISPROT;Acc:Q96IZ7]

TTAATGATTTTAAACAATCTTCCTGGGTGAGATTTACGCGTAATTTTCTTTCCTGTTCTCTCTTTCCCCAGATTTAGTA  
TAGTAGTCTTCTCCTTATCT

In100 candidate2740 (in intron):

LOCUS ENSG00000174891

DESCRIPTION Arginine/serine-rich coiled coil protein 1.

[Source:Uniprot/SWISPROT;Acc:Q96IZ7]

AACCCTCCTTCTAGGATTCTTATTATATAGATGTTAACACTTCTACTCCTGTTCTTAATTCTATCAGTTGTTTGTCTTGT  
CTTTTTGCCCCCTCCCTATG

In100 candidate2741 (in intron):

LOCUS ENSG00000174891

DESCRIPTION Arginine/serine-rich coiled coil protein 1.

[Source:Uniprot/SWISPROT;Acc:Q96IZ7]

TAACATAGTACTGAATCTGGTTTTTCTACCAGCGTGACCATTCTGTCTCCTTTTCTTCTTGATTTCGAAGTGTTGTT  
TACAGGAACTCAGTCTTTTT

In100 candidate2742 (in intron):

LOCUS ENSG00000174891

DESCRIPTION Arginine/serine-rich coiled coil protein 1.

[Source:Uniprot/SWISPROT;Acc:Q96IZ7]

AACAAATGGGTATAAAAAAGGCTACATAACAATCTCCTATTCATCTTGTTTTTTTTTAATTTTACTTTTTAATTTTCAGCT  
TCTGATCTAATCCATTTTCAT

In100 candidate2743 (in intron):

LOCUS ENSG00000071073

DESCRIPTION mannosyl (alpha-1,3-)-glycoprotein beta-1,4-

Nacetylglucosaminytransferase,

isoenzyme A [Source:RefSeq\_peptide;Acc:NP\_036346]

CGTGAGATTGACACATAAAATTAACCATCACAAAGGTCCTCTAGTGAATTTTACTTCTATTGTACTTTTCAACTCCAGAA  
TTTCCATTTTCGTTCTTTCTT

In100 candidate2744 (in intron):

LOCUS ENSG00000071073

DESCRIPTION mannosyl (alpha-1,3-)-glycoprotein beta-1,4-

Nacetylglucosaminytransferase,

isoenzyme A [Source:RefSeq\_peptide;Acc:NP\_036346]

TTGTGGAAGCCAATATCCTGTTTCTTATCATACTTTTACCTACAAACGTTAACATCCTTTGATGATTTTTGCCTGCAGCA

ATTTTTTTTAAACTTTTATTT

In100 candidate2745 (in intron):

LOCUS ENSG00000071073

DESCRIPTION mannosyl (alpha-1,3-)-glycoprotein beta-1,4-

Nacetylglucosaminytransferase,

isoenzyme A [Source:RefSeq\_peptide;Acc:NP\_036346]

TTTTAGTTGCTCTAACAACTAAATTCCATTTTGTTTTATATTTCTGTCTCTTCGTTTTCTCTATTCATTGAGTCAGTTT

CCTCACATGGTCCTTTAGTT

In100 candidate2746 (in intron):

LOCUS ENSG00000071073

DESCRIPTION mannosyl (alpha-1,3-)-glycoprotein beta-1,4-

Nacetylglucosaminytransferase,

isoenzyme A [Source:RefSeq\_peptide;Acc:NP\_036346]

GGTTGATTTCAAGATTTCTTCTTTGTCTCTAGTTTTCTAACGTTCAATTGTGGTGTTTCTTTTCATGGGTTTCTTCAGGT

TTATCCTGTTTGGGTTTTGC

In100 candidate2747 (in intron):

LOCUS ENSG00000196872

DESCRIPTION similar to 2010300C02Rik protein (MGC42367), mRNA

[Source:RefSe\_dna;Acc:NM\_207362]

TAACTCTTTTCTCTTGCTGCTTTCAAGTTTTTCTCCTTATCTTTAGCTTTCACATTTTCACTCTGTGTCTGTGAGCAGTT

CTCTGTGTTTATCTTACTTG

In100 candidate2748 (in intron):

LOCUS ENSG00000135951

DESCRIPTION testis specific, 10 [Source:RefSeq\_peptide;Acc:NP\_079520]

GACCTTCTTTTGCCTTAGGACCTTTGTTAGAGCTGTAACCTTTGCTGCAATGTTTTTTGCCAGATTTTCACATGATTG  
ACTTCCTTTCCTCTGAAGTT

In100 candidate2749 (in intron):

LOCUS ENSG00000135951

DESCRIPTION testis specific, 10 [Source:RefSeq\_peptide;Acc:NP\_079520]

CTTCATCTACTACATTTCTTATAACTGTTATTTGTAACCTTTTTTCCTTGTCTTTTTTCATATTGATAATATCTAGCAGTG  
TCTTTTAGTTTTTTAAATTT

In100 candidate2750 (in intron):

LOCUS ENSG00000124788

DESCRIPTION Ataxin-1 (Spinocerebellar ataxia type 1 protein).

[Source:Uniprt/SWISSPROT;Acc:P54253]

AGCCTAGGATGTCCCTCACCATCATTTATAATGCTTTTAACTTACATTCCATTTTGTCTGATATTCAGAGTGCTATCCT  
GGTTTTTGTTTTTAGTTTTG

In100 candidate2751 (in intron):

LOCUS ENSG00000124788

DESCRIPTION Ataxin-1 (Spinocerebellar ataxia type 1 protein).

[Source:Uniprt/SWISSPROT;Acc:P54253]

TCTTAGTTGTGCATTGTACATTAGAAATATTAGTTTTGAAGATAACCTAAACACAAGTTTTTATTTCTTCTGTCACAGTT  
GCCTCTTTTCTTAAAATCGT

In100 candidate2752 (in intron):

LOCUS ENSG00000124788

DESCRIPTION Ataxin-1 (Spinocerebellar ataxia type 1 protein).

[Source:Uniprot/SWISSPROT;Acc:P54253]

ATGCATCTCATTTAGTCATCACCCCTAACCCCTGTAGGGTACGTGTTATTATCTCCATTTTCTTTATTTTTTGAGACAGGGT  
CTTGTTCTGTCTCCCAGGTT

In100 candidate2753 (in intron):

LOCUS ENSG00000099256

DESCRIPTION phosphoribosyl transferase domain containing 1

[Source:RefSeq\_ptide;Acc:NP\_064585]

TCCTGTGTTTTTCCTCTTTCTCCCTGCCTCCACCTAACCCCTGTTGACCACTGATCTTTTTACTGTCTCCACAGTTTTG  
CCTTTTCTAGAACGTCATTT

In100 candidate2754 (in intron):

LOCUS ENSG00000112186

DESCRIPTION Adenylyl cyclase-associated protein 2 (CAP 2).

[Source:Uniprot/SWISSPROT;Acc:P40123]

AGAGGAATTGTCTGCTAAATCTAGTAATTGAAATAACTTAGACTTGTAATACTTTCGTATTTTCAGTTTTTTTAATTTCA  
TTTTTCTAGTACTGCATTTT

In100 candidate2755 (in intron):

LOCUS ENSG00000051825

DESCRIPTION M-phase phosphoprotein 9.

[Source:Uniprot/SWISSPROT;Acc:Q99550]EXON

AAGATCTAGATCCTAACTGTGATTCTGGGTGTATGTTTTCTTCAGATTGAAGGCTTGTGTTTATTGCCTATGACATGAT  
CAATTCTTTTCCTTTCTCTC

In100 candidate2756 (in intron):

LOCUS ENSG00000173826

DESCRIPTION Potassium voltage-gated channel subfamily H member 6 (Voltagegated  
potassium channel subunit Kv11.2) (Ether-a-go-go-related gene  
potassiumchannel 2) (Ether-a-go-go-related protein 2) (Eag-related protein 2).

[Soure:Uniprot/SWISSPROT;Acc:Q9H252]

CTCATTTGGTCTTGAAGTGTCTCATTTTCTCAACCTTATATACGCCTAACTCCTGCACATATTCTTGCTCTGCAGATTCT  
GTTTTCTTAAGTATTAATCT

In100 candidate2757 (in intron):

LOCUS ENSG00000158417

DESCRIPTION Eukaryotic translation initiation factor 5B (eIF-5B) (Translatin  
initiation factor IF-2). [Source:Uniprot/SWISSPROT;Acc:O60841]

TTACATATTTTGTTAGATTTAAGTATGTTACTTTCTTTGGAATAACTATAAGTAATATGATTGTTTTTTCCCCCTCAGTT  
TTTCTGTTTGTTTGTTTTTT

In100 candidate2758 (in intron):

LOCUS ENSG00000151967

DESCRIPTION schwannomin interacting protein 1

[Source:RefSeq\_peptide;Acc:NP055390]

ACTCTGGTTTATTTAACAAAATATTTATCACTTTAGTAAATTTCTCATATCCCCAATTTTTTTGTATTTTTTTTCAGAATTC

TTTGTATCTCACTAAGCTT

In100 candidate2759 (in intron):

LOCUS ENSG00000151025

DESCRIPTION Probable G-protein coupled receptor 158 precursor.

[Source:Unipot/SWISSPROT;Acc:Q5T848]

GGTAATTCTAGCATTGGTCTTTAGGTAATCTTTTTTAACTTTTTTTTCCTTTTCTCCTCTTTATTTTCAAACAGCCTGT

CTTTGAGCTTGCTGCTGCTT

In100 candidate2760 (in intron):

LOCUS ENSG00000068885

DESCRIPTION Tripartite motif-containing protein 59 (Tumor suppressor TSBF-1

(RING finger protein 104). [Source:Uniprot/SWISSPROT;Acc:Q8IWR1]

TGAAATTTTAAGAATTTTTTCTAACACCTACCTTTTCTTTATCTTTTGAAGTTGTTTCTCCAGTTTTTTGGCTTTACT

CGTGGCATGTTTTAACTTTT

In100 candidate2761 (in intron):

LOCUS ENSG00000068885

DESCRIPTION Tripartite motif-containing protein 59 (Tumor suppressor TSBF-1

(RING finger protein 104). [Source:Uniprot/SWISSPROT;Acc:Q8IWR1]

TGCTCTGAGCCTCTTTTGAAGCATTAATGTAATATTTTACTTATTGCATAACCCATTTATTCATTTCTTTACTCTCAGCT

ATTATTTCTCCTATCCATTT



In100 candidate2762 (in intron):

LOCUS ENSG00000068885

DESCRIPTION Tripartite motif-containing protein 59 (Tumor suppressor TSBF-1 (RING finger protein 104)). [Source:Uniprot/SWISSPROT;Acc:Q8IWR1]

TCTTCTTAACTTTGATGCTCTCTTTTTCTCTAATCTTTGATGCTCTCTTTTTCTCTAATCTTTTGGAAGTCACACAGTC  
TATCTGTTTACTCTTAGTTA

In100 candidate2763 (in intron):

LOCUS ENSG00000095777

DESCRIPTION Myosin IIIA (EC 2.7.11.1). [Source:Uniprot/SWISSPROT;Acc:Q8NEV4]

GTCTTTTAAAAAACCAAAGATATTCCTCCTGCTATAACTAAATCTCCTCCTATTTCTTCTTATCTGTAAACAGCCCCA  
GAGATTTCTATTATTTTCTT

In100 candidate2764 (in intron):

LOCUS ENSG00000095777

DESCRIPTION Myosin IIIA (EC 2.7.11.1). [Source:Uniprot/SWISSPROT;Acc:Q8NEV4]

AATGTCTTCATTGACCCATTGGTTGTTTAGTATCATATTGGTTAACCCTTTTCTGTTTTTTTTTTAAGTACAGCTTGC  
TGCTATTGCTCATTTAATTT

In100 candidate2765 (in intron):

LOCUS ENSG00000144218

DESCRIPTION AF4/FMR2 family member 3 (Protein LAF-4) (Lymphoid nuclear protein related to AF4). [Source:Uniprot/SWISSPROT;Acc:P51826]

AAGAACAATCAACCTAAGATGCTGATATAACTTTTCCTATTTTCTCTTTCAACATACTTTCATATTTGCAGTTCACATA  
TTCCATTTTAAAGCCATCTT

In100 candidate2766 (in intron):

LOCUS ENSG00000144218

DESCRIPTION AF4/FMR2 family member 3 (Protein LAF-4) (Lymphoid nuclear protein related to AF4). [Source:Uniprot/SWISSPROT;Acc:P51826]

AGATATACTGAGAGAATGTTTCACTATGAACATAACATTTAAAGCACTCAACTTTCTATCCTTAACATTTTTACAGCCTC  
ATTCATTTGAGTCATTTTT

In100 candidate2767 (in intron):

LOCUS ENSG00000188026

DESCRIPTION CDNA FLJ39378 fis, clone PERIC2000214.

[Source:Uniprot/SPTREMBLAcc:Q8N1M0]

GTGGGATCCTACAACATGTGGTCCTGCCTGGCTTCTTTAACTTAGCATGTTTTCTTGTTAATCCAGGTCTCATATTTCA  
ACTCAAGGTTTCCTGCCTTT

In100 candidate2768 (in intron):

LOCUS ENSG00000186635

DESCRIPTION Centaurin-delta 2 (Cnt-d2) (Arf-GAP, Rho-GAP, ankyrin repeat and pleckstrin homology domain-containing protein 1).

[Source:Uniprot/SWISSPRO;Acc:Q96P48]

GATTGTGTACATTTATAAAGTAACTTAGACATCATTAATCTCTTTATGTTGTCTTCTATCCAGAACTTACTGTGCTCTGC  
CATTTGTCCAGGTCTTCTTT

In100 candidate2769 (in intron):

LOCUS ENSG00000163590

DESCRIPTION Protein phosphatase 2C isoform epsilon (EC 3.1.3.16) (PP2Cepsion)  
(Protein phosphatase 1L) (Protein phosphatase 1-like).

[Source:Uniprot/WISSPROT;Acc:Q5SGD2]

GGCCAATCACCCCATCTCTCAAATTGGCGGTTTGTAACGGGTTCATTGCTGCATACTCTTTGTTTTCCCTTTTGGCAGCA  
TACTTTTCTTATTCTTAACC

In100 candidate2770 (in intron):

LOCUS ENSG00000137478

DESCRIPTION FCH and double SH3 domains protein 2 (SH3 multiple domains 3)  
(arom). [Source:Uniprot/SWISSPROT;Acc:O94868]

AATTCATTTAACTCTCATTTATGACTTTTTGGCTGTTAGACCTTTTGACTCTGTTTCATGTCTTTTCTACTTTTTCAGCA  
TTTTGTTTTCCACCCTTTTT

In100 candidate2771 (in intron):

LOCUS ENSG00000090402

DESCRIPTION Sucrase-isomaltase, intestinal [Contains: Sucrase (EC 3.2.1.48)  
Isomaltase (EC 3.2.1.10)]. [Source:Uniprot/SWISSPROT;Acc:P14410]

TGCTTTATTAATTTATCATCTACCATAATCCCTTCTTTATTTCTGATAACATTTTATTGATCTCCTTTTTATTACAGAC  
TTTACCCCTTTTTGTTATTC

In100 candidate2772 (in intron):

LOCUS ENSG00000071054

DESCRIPTION Mitogen-activated protein kinase kinase kinase kinase 4 (EC  
2.7.11.1) (MAPK/ERK kinase kinase kinase 4) (MEK kinase kinase 4) (MEKKK 4)

(HP/GCK-like kinase HGK) (Nck-interacting kinase).

[Source:Uniprot/SWISSPROT;Ac:O95819]

ACCCTAACCTATTTTTCCATTCTTTTTCACTTTTAATACTAGCCTCAGAAAATAACTCATTATTCTCTAACACTTCCCTA  
CTTTTG TTCATATCATTTCCT

In100 candidate2773 (in intron):

LOCUS ENSG00000071054

DESCRIPTION Mitogen-activated protein kinase kinase kinase kinase 4 (EC

2.711.1) (MAPK/ERK kinase kinase kinase 4) (MEK kinase kinase 4) (MEKKK 4)

(HP/GCK-like kinase HGK) (Nck-interacting kinase).

[Source:Uniprot/SWISSPROT;Ac:O95819]

TGATGGTGGCTTAGATTCCCTGGCTGGAAGTGCTTCATGACCATGGTAACCATTCCTCTCTTTTCTTGCTTTTGCAGGT  
GTTCTTTGCCTCTGTTCGGT

In100 candidate2774 (in intron):

LOCUS ENSG00000175582

DESCRIPTION Ras-related protein Rab-6A (Rab-6).

[Source:Uniprot/SWISSPROT;Ac:P20340]

CTTAAGCCTTATATTCTGCCTCTCTCAAATTTAACCTCACCCCAATTTATCCTTTTGTGTTTCATATCCTTAACACAGTA  
GGACTTTATTTTTTATTTTT

In100 candidate2775 (in intron):

LOCUS ENSG00000174776

DESCRIPTION WD repeat protein 49. [Source:Uniprot/SWISSPROT;Acc:Q8IV35]

TTGTCCTTTTAACTTGTCCAAAAATAAACTTTTTGTTTCATTAATCTTCTGTATTTTTTTTCAATTTTATTTATTTTCAGCT  
CTGATCTTTATTATTTCTTT

In100 candidate2776 (in intron):

LOCUS ENSG00000136754

DESCRIPTION Abl interactor 1 (Abelson interactor 1) (Abi-1) (Spectrin SH3  
domain-binding protein 1) (Eps8 SH3 domain-binding protein) (Eps8-binding  
protein) (e3B1) (Nap1-binding protein) (Nap1BP) (Abl-binding protein 4) (AblBP).  
[Source:Uniprot/SWISSPROT;Acc:Q8IZP0]

TGTGTTGGCAACTGTTAGTAACTGTAAACGTGTTTAAACCTGTCTGTGTACTATTACTTTTTTCAGGTAGTTGTATGTTGT  
AATGCTTTTTTTTTTACCCCT

In100 candidate2777 (in intron):

LOCUS ENSG00000136754

DESCRIPTION Abl interactor 1 (Abelson interactor 1) (Abi-1) (Spectrin SH3  
domain-binding protein 1) (Eps8 SH3 domain-binding protein) (Eps8-binding  
protein) (e3B1) (Nap1-binding protein) (Nap1BP) (Abl-binding protein 4) (AblBP).  
[Source:Uniprot/SWISSPROT;Acc:Q8IZP0]

TTCTTTAACATAAAGTTTTTATGGGTATCATTTTATCTGTAGTATCTTCTTCCCTTTCTTCTCAGCCACTTTGTTTCATTT  
ATGTTAATACATTTGCCTTC

In100 candidate2778 (in intron):

LOCUS ENSG00000145996

DESCRIPTION CDK5 regulatory subunit associated protein 1-like 1

[Source:Refeq\_peptide;Acc:NP\_060244]

AACTCCCCATTCTCCTTTCTTCCAATCCCTGGTAACGACGATTCTACTTTCTGCCTCTCTGAATTTGACTGTTCCAGAT  
TCCTTTTATATCAGTCGCCTT

In100 candidate2779 (in intron):

LOCUS ENSG00000145996

DESCRIPTION CDK5 regulatory subunit associated protein 1-like 1

[Source:Refeq\_peptide;Acc:NP\_060244]

TCTGGTTATAACTTTCTGTCCTTTTTCTTTTCTCCTTCCTTTTTTTCCCTTCATTTTTTTCTTTCTCCAACCCCCAGCC  
ACTTCATTTCTTCTTTTCTG

In100 candidate2780 (in intron):

LOCUS ENSG00000145996

DESCRIPTION CDK5 regulatory subunit associated protein 1-like 1

[Source:Refeq\_peptide;Acc:NP\_060244]

ATGAAGATTGTTATTAACATTTTACCATCTTTATTATGTCATATCTTTCTTCATCCATTTCTATTCATCCATCAGTCCAA  
CTTATTTTTTTTAACATGTTT

In100 candidate2781 (in intron):

LOCUS ENSG00000107890

DESCRIPTION Ankyrin repeat domain-containing protein 26.

[Source:Uniprot/SWSSPROT;Acc:Q9UPS8]

CACTTGGAACATAATCTTACATTCAAATCATAACTGCATGTTTTATTAAACCTATATTCCTGTTTTTTCTCCAGTATAC  
TTCTGTCATGTTGCTGTCCT

In100 candidate2782 (in intron):

LOCUS ENSG00000107890

DESCRIPTION Ankyrin repeat domain-containing protein 26.

[Source:Uniprot/SWSSPROT;Acc:Q9UPS8]

ACCTCTGATGCCTTGGGGACAATGTTAGGAGCTAACTGCCTTTGAGACTCTTTAGTTCTTTTGGATCACCAACTCAGCTA  
TCTTCTTTTCCCCTACAATT

In100 candidate2783 (in intron):

LOCUS ENSG00000165434

DESCRIPTION Phosphoglucomutase-2-like 1 (EC 5.4.2.2) (PMMLP).

[Source:Uniprt/SWISSPROT;Acc:Q6PCE3]

CAAAGACATTTTAATGTCTACCTTGTTAGAAAACCTCTTTAACGTAAGTAATGGTTTTATGTTGTGTTTCTGCTTCAGAA  
TTTTTTCACGTCATTTTCTC

In100 candidate2784 (in intron):

LOCUS ENSG00000114248

DESCRIPTION Leucine-rich repeat-containing protein 31.

[Source:Uniprot/SWISPROT;Acc:Q6UY01]

AGAAAAATGTAGGGAAAATACTGAATTTCTTTTATTATAACACAAACGATCATTTCTTTAAGATTCTTTTCAGTCTTTT  
CTTTTCATATGCATGCATTT

In100 candidate2785 (in intron):

LOCUS ENSG00000115616

DESCRIPTION Sodium/hydrogen exchanger 2 (Na(+)/H(+) exchanger 2) (NHE-2)

(Slute carrier family 9 member 2). [Source:Uniprot/SWISSPROT;Acc:Q9UBY0]

AGTTTTTTTAAATTGTTTTTGATATTCTGCTATTTTTTTAACGTGTCTAAGTATAGATTTACTTTATTTTTCTTGCTCAGAA  
CTTGTTATACTTCCATGCTT

In100 candidate2786 (in intron):

LOCUS ENSG00000115616

DESCRIPTION Sodium/hydrogen exchanger 2 (Na(+)/H(+) exchanger 2) (NHE-2)

(Slute carrier family 9 member 2). [Source:Uniprot/SWISSPROT;Acc:Q9UBY0]

GGTATGTGTTTGCTATTTCTATCTGCCTTTTCTGATAACACTGGTTAAATTATGCTTTCTTTCCTTATTGTTGTACAGCT  
TCTTACTTTATATGACATTC

In100 candidate2787 (in intron):

LOCUS ENSG00000166240

DESCRIPTION

AGCACCCCATCTTTCTAACTCATCTCATCTCTGTCTAGCTTTGTTTAAACATGTGTGTTTTGTCTTCTGTCTCAGTC  
TGTTTCTCTGTGTTGCATGT

In100 candidate2788 (in intron):

LOCUS ENSG00000135972



DESCRIPTION 28S ribosomal protein S9, mitochondrial precursor (S9mt) (MRP-S).

[Source:Uniprot/SWISSPROT;Acc:P82933]

AGTGATTTTTTTTTCTTCTTCTTCTTTACTAACTCTTCTATTTTTTTAAACCTCTCAGGCTCCTCACCTATTTCTCTCTC  
TCTTTGTTCTTTATATCTCT

In100 candidate2789 (in intron):

LOCUS ENSG00000163558

DESCRIPTION Protein kinase C iota type (EC 2.7.11.13) (nPKC-iota)  
(Atypicalprotein kinase C-lambda/iota) (aPKC-lambda/iota) (PRKC-lambda/iota).

[Source:Uniprot/SWISSPROT;Acc:P41743]

GTAACTCTATCTTTTTTGCTCCACTTGATTCTCTCTTATAGTTTCCAGTTAGCCATATTTCAAGTCTATGTGTTGACTT  
ACTTTCTTACACTTCTCTTC

In100 candidate2790 (in intron):

LOCUS ENSG00000166435

DESCRIPTION X-ray radiation resistance associated 1 protein (Fragment).

[Source:Uniprot/SPTREMBL;Acc:Q7RTT7]

AGGCTTGTTTTAACTAATTAAAGGCCTTTTGAGCTTCAGGTTCTCAGGTTAGGAAATGAGTTTTAGCCACTTGAGTTTCT  
TTCTTTTTTTTTTTTTTTTTT

In100 candidate2791 (in intron):

LOCUS ENSG00000151948

DESCRIPTION glycosyltransferase 1 domain containing 1

[Source:RefSeq\_peptid;Acc:NP\_653270]

TAATAAATAAATATATTAAAAATTATATATATATATATAACATGGACTCATAGATATTTATTTTATTTCCCTTTACAGAT  
TATCTGTTACTATTTTTGTT

In100 candidate2792 (in intron):

LOCUS ENSG00000151952

DESCRIPTION transmembrane protein 132D (TMEM132D), mRNA

[Source:RefSeq\_dna;cc:NM\_133448]

TTCCTATTTATTTCTGCATCTAATGGACTATGGGAAGTAACATTGAATCTTGATCCTTTTTGTTTCTATGATTATCAGGT  
TACTTGCCTTTTATAGTTCC

In100 candidate2793 (in intron):

LOCUS ENSG00000151952

DESCRIPTION transmembrane protein 132D (TMEM132D), mRNA

[Source:RefSeq\_dna;cc:NM\_133448]

TTTAACTATTTTCTATTAATTTTCATGTGTTCTTTGTTCTGTATCTGCCCCTTTTCTGCCTGATTCCAGTATCTTATGTG  
ATTACATTTGCTATCCTCTC

In100 candidate2794 (in intron):

LOCUS ENSG00000163581

DESCRIPTION Solute carrier family 2, facilitated glucose transporter member2  
(Glucose transporter type 2, liver). [Source:Uniprot/SWISSPROT;Acc:P11168

AAACTGCTAACTCAAAGTCTGTGTTTGCTTTCTATCCAGGACTTCTGTGGACCTTATGTGTTTTTCCTCTTTGCTGGAGT  
GCTCCTGGCCTTTACCCTGT

In100 candidate2795 (in intron):

LOCUS ENSG00000122707

DESCRIPTION Reversion-inducing cysteine-rich protein with Kazal motifs  
precursor (hRECK) (Suppressor of tumorigenicity 15) (ST15).

[Source:Uniprot/SWISPROT;Acc:O95980]

TCTTAACTACTTCTAGGTTATAGTTTTTATTTTTTTTCTTTTCTCAAAGCCTGTATCTCTTATTTTTTAACTTGACAGTC  
TTATTTATCTTTTGTTTCCTT

In100 candidate2796 (in intron):

LOCUS ENSG00000068308

DESCRIPTION OTU domain-containing protein 5.

[Source:Uniprot/SWISSPROT;Acc:96G74]

TGGAAATCTTTAAGGAGGATCTGTGTCTCATCCTTAACTCATCCTTAATTTATTAATTTTTCCAGTTATTACGTACATCA  
ATATGGTCTTTTTTTTTTTTTT

In100 candidate2797 (in intron):

LOCUS ENSG00000111452

DESCRIPTION Probable G-protein coupled receptor 133 precursor (G-protein  
coupled receptor PGR25). [Source:Uniprot/SWISSPROT;Acc:Q6QNK2]

TTTCTGTCTTTACCTATTTTGGAGATTCCACATAAATGGAAATGTGTAACGTATAACCTTTTTGTCTTAATCTCTCAGAT  
TTTTTTTTTGCTCTGTAA

In100 candidate2798 (in intron):

LOCUS ENSG00000108854

DESCRIPTION Smad ubiquitination regulatory factor 2 (EC 6.3.2.-)  
(Ubiquitinprotein

ligase SMURF2) (Smad-specific E3 ubiquitin ligase 2) (hSMURF2).

[source:Uniprot/SWISSPROT;Acc:Q9HAU4]

GTTGCTGAAATATTTTCATTTTTATTAAAATTTTCCTGGGTAGTGCCTAACGAGTATATATACTGTTTTCAATTCAGGAA  
CATTTATCCTATTTCCACTT

In100 candidate2799 (in intron):

LOCUS ENSG00000176809

DESCRIPTION Leucine-rich repeat-containing protein 37A.

[Source:Uniprot/SWISPROT;Acc:O60309]

GTGGCTGTTTAAATTTGTAGTGGTTGAAAAGTCTTGAGATTGTCACACCTAACAACTCTTATACTTTTCTTCTCTCAGCT  
GCAGCTTGTTCTTTTCACCT

In100 candidate2800 (in intron):

LOCUS ENSG00000198382

DESCRIPTION UV radiation resistance-associated gene protein (p63).

[Source:niprot/SWISSPROT;Acc:Q9P2Y5]

CTTAACTGTTGATAGCGTCCTTCTTACATTAGCAGTTTGTCTGAGCTTTTCTGGTGAGATACTTCTTGGTTTTCTCATA  
TCTTTTAACCAGTCCTTTTC

In100 candidate2801 (in intron):

LOCUS ENSG00000159921

DESCRIPTION Bifunctional UDP-N-acetylglucosamine 2-epimerase/Nacetylmannosamine  
kinase (UDP-GlcNAc-2-epimerase/ManAc kinase) [Includes: UDP-N

acetylglucosamine 2-epimerase (EC 5.1.3.14) (Uridine diphosphate-  
Nacetylglucosamie-

2-epimerase) (UDP-GlcNAc-2-epimerase)

[Source:Uniprot/SWISSPROT;Acc:Q9Y22]

CGTGGATGTTCTTTAACATTTCTGCTGCTGGCTCTTTTCTGCCTTCCTCTTTGGTATTTTGATTTTGGCTTCTCTCAGAA  
ACTCATTTTAATTTTGTCT

In100 candidate2802 (in intron):

LOCUS ENSG00000112293

DESCRIPTION Phosphatidylinositol-glycan-specific phospholipase D precursor EC  
3.1.4.50) (PI-G PLD) (Glycoprotein phospholipase D)

(Glycosylphosphatidylinositol-  
specific phospholipase D).

[Source:Uniprot/SWISSPROT;Acc:P80108]EXON

CTGCCTGTTCTCCAAAATTGTTTGCTGGCCCTTGCCTTAGAAAATAACCATTATTAGTATTTTGCTATTTTCTTCCAGAC  
TTTCAGAGTTTTTTCTTTCT

In100 candidate2803 (in intron):

LOCUS ENSG00000075420

DESCRIPTION fibronectin type III domain containing 3B

[Source:RefSeq\_peptid;Acc:NP\_073600]

AACTTAACATTTTCTTAAATATCTTCTAGCACTTTATCTGTACTTTTCAGAAGACTTGACTTTTTTCATTGTTGTCTAATA  
GTCTCCTTGTCTCCCTTATT

In100 candidate2804 (in intron):

LOCUS ENSG00000075420

DESCRIPTION fibronectin type III domain containing 3B

[Source:RefSeq\_peptid;Acc:NP\_073600]

TAAATTGAAAAGACATAGAAGATTTTAACTACATATGAAGTACTATTTTAAGTCATTTGAGATTTTCTCTCCTCCAGAA  
TTTTTTAATCCTGTCATACT

In100 candidate2805 (in intron):

LOCUS ENSG00000075420

DESCRIPTION fibronectin type III domain containing 3B

[Source:RefSeq\_peptid;Acc:NP\_073600]

GTGGGCTAGTGACAAGAATCACACTTTTATAACAAGTTTAGAAAATGTCTTTCCAACCTTCATTGTCATTTTGCTTCAGGT  
TTTTGTTACTATTCATACTG

In100 candidate2806 (in intron):

LOCUS ENSG00000177192

DESCRIPTION tRNA pseudouridine synthase A (EC 5.4.99.12) (tRNA-uridine  
isomerase I) (tRNA pseudouridylate synthase I).

[Source:Uniprot/SWISSPROT;Acc:Q9606]

TGATAGAGTACCATCATCTAACATGTCCAAAGTAGGAACTCTCTTTTCTGTTTTCTTTTTCTTTTCTTCAGCTTCTTTG  
ATGTGGCATGCCTTTTATTT

In100 candidate2807 (in intron):

LOCUS ENSG00000179240

DESCRIPTION

AGATGATATCTTATTGTAGCAATGCACATTCTGATGTCAAGAAAAGTGAACACTTAACTGAACTTTGTTGTTTGCAGGA  
TGTTTTTCTTCTCTACTAGC

In100 candidate2808 (in intron):

LOCUS ENSG00000154240

DESCRIPTION Coiled-coil domain-containing protein 46.

[Source:Uniprot/SWISSROT;Acc:Q8N8E3]

TCTTTAGGTACACTAACTAGGTAAATGCTGGATCTCCATTTTGTTTTCTTCTATGTTGGTTGTTTGCTCTTACAGTTTTT  
ACTTGCTCATAATGTTATTT

In100 candidate2809 (in intron):

LOCUS ENSG00000154240

DESCRIPTION Coiled-coil domain-containing protein 46.

[Source:Uniprot/SWISSROT;Acc:Q8N8E3]

TAAAAATCCCATGGCGCGCTATAACTTGCCCCCTTTTTTATGATCTTGTCTCAGTTCCTTTCATGATGGATTTTTTTAA  
GGTATCTGCCCCCTTACCCCT

In100 candidate2810 (in intron):

LOCUS ENSG00000154240

DESCRIPTION Coiled-coil domain-containing protein 46.

[Source:Uniprot/SWISSROT;Acc:Q8N8E3]

AGTTCATGTGAACTCATAACATGTTTTAATTCTCCTTTTGAAGTTTTCTCCCCTTTCAGATAAGCACATACACTGATTGC  
TTTTTTTTTCTTTGTATTTTC

In100 candidate2811 (in intron):

LOCUS ENSG00000154240

DESCRIPTION Coiled-coil domain-containing protein 46.

[Source:Uniprot/SWISSROT;Acc:Q8N8E3]

TCTATTCTTTGGCTTTAGCTAACTTGCTCTTTTTCCTATCATTTTCACTTTTTCCTTCTTCTATGACATTAATTGCAGCT  
TCATGTCTGTAACTTCTTCC

In100 candidate2812 (in intron):

LOCUS ENSG00000154240

DESCRIPTION Coiled-coil domain-containing protein 46.

[Source:Uniprot/SWISSROT;Acc:Q8N8E3]

CTCACTAATTCTCTCCTTAGCTGTGTCTAACCTACTGTTAACTCATTCTTAATTTTGCTTATTATATTTTCCAGAGCTA  
GACTTTCTACTTAGTTCTTT

In100 candidate2813 (in intron):

LOCUS ENSG00000183495

DESCRIPTION E1A-binding protein p400 (EC 3.6.1.-) (p400 kDa SWI2/SNF2-related  
protein) (Domino homolog) (hDomino) (CAG repeat protein 32) (Trinucleotide  
repeat-containing gene 12 protein). [Source:Uniprot/SWISSPROT;Acc:Q96L91]

EXON

TATACTTTTAAACATTTTGGCTTTTGTTCCTTCATTTGATATTTTGTATTTTATATATCATCTTCATCAGTTATTTCC  
TATCAATGGTGTTCACTTTT

In100 candidate2814 (in intron):



LOCUS ENSG00000158636

DESCRIPTION Protein EMSY. [Source:Uniprot/SWISSPROT;Acc:Q7Z589]

CTGAATTTTAAAGTCTACTTACTATAACGCTTTTAACTGCCTTTGTTGCTGGATCTTATTTTCTCAGTAATTCTTCTCTC  
TTCCCTGCTTCTTGTCTAGT

In100 candidate2815 (in intron):

LOCUS ENSG00000114346

DESCRIPTION ECT2 protein (Epithelial cell-transforming sequence 2 oncogene)  
[Source:Uniprot/SWISSPROT;Acc:Q9H8V3]

AGTTGAGTTAATATCTAGTTAACTAGTCTAGCTATTTGGCTTTGTTCTCAGAATGCTATAATAGTTTCTTTTTTCTCCC  
TTTTCCATTCCCCTAACTTT

In100 candidate2816 (in intron):

LOCUS ENSG00000078124

DESCRIPTION Alkaline phytoceramidase (EC 3.5.1.-) (aPHC) (Alkaline ceramidae)  
(Alkaline dihydroceramidase SB89). [Source:Uniprot/SWISSPROT;Acc:Q9NUN7]EXON

ATTCTACCATTAACATTTTATTACACTTGTTTTTATCACATACCGATTCATTTTCCATTTCCTTTCTCCATCCATCAGTT  
CATTTTATTTTTTGATACAT

In100 candidate2817 (in intron):

LOCUS ENSG00000078124

DESCRIPTION Alkaline phytoceramidase (EC 3.5.1.-) (aPHC) (Alkaline ceramidae)  
(Alkaline dihydroceramidase SB89). [Source:Uniprot/SWISSPROT;Acc:Q9NUN7]EXON

ACAATTAGTATAGACTAACACTCATGATTGTATTTCTTCTGTTTTCTTTCTTTTCCTTTGCTTTTTCAGCATGAAGGTTG  
TATTTCTTGTTTTCTTTTTT

In100 candidate2818 (in intron):

LOCUS ENSG00000078124

DESCRIPTION Alkaline phytoceramidase (EC 3.5.1.-) (aPHC) (Alkaline ceramidae)  
(Alkaline dihydroceramidase SB89). [Source:Uniprot/SWISSPROT;Acc:Q9NUN7]EXON

AGCTTTTAAAAGTAACCTTTTATTCTTTTTTCCTGACTTTACAGTCTTACCTGATTTATCAATTTTTGCCTTTGTGGT  
TAATCCTTTTCATGTCCTAC

In100 candidate2819 (in intron):

LOCUS ENSG00000144962

DESCRIPTION spermatogenesis associated 16

[Source:RefSeq\_peptide;Acc:NP\_11461]

GGTGTAATATAATGCAAATTAACCAACAAGCATGTTCCATGTGCTTCTTCATCTTCATTCTTGTTAGTTACAGCCTTCATC  
CAAATTTTGACTATTTACTT

In100 candidate2820 (in intron):

LOCUS ENSG00000144962

DESCRIPTION spermatogenesis associated 16

[Source:RefSeq\_peptide;Acc:NP\_11461]

ATAGCATTCCACTTCCCAACTCCATAACTTTGCCTATGCTGTTACCATATCTGGCTCCCTGTTGTTTTTTCTTCAGCC  
TTGCTTGTGTCCCCTTTTTA

In100 candidate2821 (in intron):

LOCUS ENSG00000015568

DESCRIPTION Ran-binding protein 2-like 2 (RanBP2L2).

[Source:Uniprot/SWISSPOT;Acc:Q53T03]

CAAGTTAGATACTTTGAAGCACTCTTTAAAGATTTTCTTTAATAACTTGAAGGCACTGTTACACCTTTCCTGTATCAGAT  
TTTTTTTTTTTTTGGGAATTGA

In100 candidate2822 (in intron):

LOCUS ENSG00000196092

DESCRIPTION Paired box protein Pax-5 (B-cell-specific transcription  
factor)(BSAP). [Source:Uniprot/SWISSPROT;Acc:Q02548]

CTAACTGCGGCGTGTTTGTTATGTTTTTTCACCTATCTGTTACACACTTCTGCATCAGTCCAAATATCTGTGAGTTTGT  
CTGTGTTTTTCTCTGTTTCT

In100 candidate2823 (in intron):

LOCUS ENSG00000150054

DESCRIPTION palmitoylated membrane protein 7

[Source:RefSeq\_peptide;Acc:NP\_75767]

TCCTCCCAATCCCACCTTGTTTTTTCCTCTTAACCATTTCTTTGCCCCCTTTTCTTGTTGGGTATTTCATCAGTCTTCTGT  
TAATTTGATGAGCTCTTTTT

In100 candidate2824 (in intron):

LOCUS ENSG00000147905

DESCRIPTION Zinc finger CCHC domain-containing protein 7.

[Source:Uniprot/SWISSPROT;Acc:Q8N3Z6]

TTTAAATGTTTAATAATATAGCTAAAATATAACTTCTTGTATTTTCATTTCTGCTACATTTTCAGATTTTGTAGAGCCT  
GACTTTTAATGTTCTTTTTC

In100 candidate2825 (in intron):

LOCUS ENSG00000147905

DESCRIPTION Zinc finger CCHC domain-containing protein 7.

[Source:Uniprot/SISSPROT;Acc:Q8N3Z6]

TTTTGGGTGTGTCTTAACTTTGTTTATACAATATCAATTTGTTTTCTTGGATCTCTCACATTCCTTTGTTTACAGTT  
GTACATTCCTCCCTGTTTT

In100 candidate2826 (in intron):

LOCUS ENSG00000171634

DESCRIPTION bromodomain PHD finger transcription factor isoform 2

[Source:RfSeq\_peptide;Acc:NP\_004450]

AGTTTTGTGTCTCTATTCCATTGAGATTGTTGTAAGTTATTTAAGCATGACTATTTCTTCTCAGTTTCTCTTTTTTATAT  
TTTATTTTCATTTGTATGTT

In100 candidate2827 (in intron):

LOCUS ENSG00000095787

DESCRIPTION WW domain-containing adapter protein with coiled-coil.

[Source:niprot/SWISSPROT;Acc:Q9BTA9]

TTAAGTAATTTGTTAAAGTCAAGTAACTGTCTCTTCAATTTTCTGTTTTTGTGATCATTGTCTTGACAGTTTAGTTTATA  
AATCGTCTCAGTTTCTCTT

In100 candidate2828 (in intron):

LOCUS ENSG00000095787

DESCRIPTION WW domain-containing adapter protein with coiled-coil.

[Source:niprot/SWISSPROT;Acc:Q9BTA9]

TCACCTTTGTACATTTAACACTTTTAACTCCTTTTTGAAATTCTTCTCTGGCTTCTGTGATACTACACTCCTTCAGTT  
GCCTATTTCTGTTTCCTTCCT

In100 candidate2829 (in intron):

LOCUS ENSG00000184538

DESCRIPTION RANBP2-like and GRIP domain-containing protein 7 (RANBPL1 isoform

2). [Source:Uniprot/SWISSPROT;Acc:Q9H0B2]

CAAGTTAGATACTTTGAAGCACTCTTTAAAGATTTTCTTTAATAACTTGAAGGCACTGTTACACCTTTCCTGTATCAGAT  
TTTTTTTTTTTTTGGGAATTGA

In100 candidate2830 (in intron):

LOCUS ENSG00000149262

DESCRIPTION Integrator complex subunit 4 (Int4).

[Source:Uniprot/SWISSPROT;cc:Q96HW7]

GTGCTTTCTTGCCTTGACTTAACTCTTTTGGAGGACTGCTTGGTCTCCTTTACAGCTCCTGATTGTCGTTTATAACACCT  
AGTCATTTTCCATTGTCTTT

In100 candidate2831 (in intron):

LOCUS ENSG00000141337

DESCRIPTION Arylsulfatase G precursor (EC 3.1.6.-) (ASG).

[Source:Uniprot/SWISSPROT;Acc:Q96EG1]

TTCCAATCCATGAACATGGGATGTAACCATTTGTTTATGTCTTCTTTAATGTCTTTCAGCTATATTTTATGGTTTTTCATT

ATGCAAGTCTTTCACTTTTT

In100 candidate2832 (in intron):

LOCUS ENSG00000169760

DESCRIPTION Neuroligin-1 precursor. [Source:Uniprot/SWISSPROT;Acc:Q8N2Q7]

TATTATGATACCTGCAAGGAACCAAAACAATGCTGTCTTAGGAACTGGTAACTTTGATCTCTGAACTCTTTTCTACAGAT  
ATATATTTGTGTCCTCTTA

In100 candidate2833 (in intron):

LOCUS ENSG00000169760

DESCRIPTION Neuroligin-1 precursor. [Source:Uniprot/SWISSPROT;Acc:Q8N2Q7]

CTTCTATGACTGCTTCATAATAATGTATGGGGTATGTAATATGTGCTAACCACTGTGTTGAGTGTTTTATTCTGCAGTT  
TTTTTGTTTTGCTTTTAGTT

In100 candidate2834 (in intron):

LOCUS ENSG00000169760

DESCRIPTION Neuroligin-1 precursor. [Source:Uniprot/SWISSPROT;Acc:Q8N2Q7]

CTGAGAAAAGTCATGAAGTGTAATAAATTAGCTGCATTACTGACTTTTAAACAACAAAGATATGGGTCTTTTCTTCAGCC  
AGGGTCAGTTTTTTCTCTCT

In100 candidate2835 (in intron):

LOCUS ENSG00000169760

DESCRIPTION Neuroligin-1 precursor. [Source:Uniprot/SWISSPROT;Acc:Q8N2Q7]  
GATATAGTTCAAAAAGGATAAGGAGCTTAATTCCTTTCTCATAAATAACTGTGCCACTGAGTATATCTCTTTACTCAGCT  
ATTGCTCCTCTCTTGCTTTT

In100 candidate2836 (in intron):

LOCUS ENSG00000070601

DESCRIPTION FERM and PDZ domain containing 1

[Source:RefSeq\_peptide;Acc:NP\_55722]

GATAAATTAGACTGTGTCTAACTGTATTATACTGGGTTTTCTATCATTTATTTGTTATTTTATTCATTCATTCTGCAGAT  
TTTTTGTACCTTGTATTTGC

In100 candidate2837 (in intron):

LOCUS ENSG00000177565

DESCRIPTION F-box-like/WD repeat protein TBL1XR1 (Transducin beta-like 1Xrelated  
protein 1) (Nuclear receptor corepressor/HDAC3 complex subunit

TBLR1)(TBL1-related protein 1). [Source:Uniprot/SWISSPROT;Acc:Q9BZK7]

TAAATATTTTAAAAATATAGTTATTTGAAATTCATGTAACCTCCATAGTAAGTTCCCATTAATCTTTTCTTTCCAGTC  
TGTTTCCTTTATGAGCTTAC

In100 candidate2838 (in intron):

LOCUS ENSG00000172965

DESCRIPTION LOC541471 protein (Hypothetical protein MGC4677).

[Source:Uniprt/SPTREMBL;Acc:Q96C48]

TGTGTCGTTTATATTATGGAAC TATTTAACTTTTAAGTAGTTATTATTTTCCTTTTAACACCCAGGTTTTGTCTTGCTTA  
GAAAGTCTGTTTCCTACCCCT

In100 candidate2839 (in intron):

LOCUS ENSG00000108950

DESCRIPTION Protein FAM20A precursor.

[Source:Uniprot/SWISSPROT;Acc:Q96MK3]EXON

CTTCATCCTTGGACATCTGGATCTGCACTACCTCTGGTTCTGCTAACCATTCCCCTCTCTTCTGTTTATACCTGCAGAAG  
AATGTCTATTTCTTCCCTCT

In100 candidate2840 (in intron):

LOCUS ENSG00000141338

DESCRIPTION ATP-binding cassette sub-family A member 8.

[Source:Uniprot/SWISPROT;Acc:O94911]

GAACATAATAAACTCTCTATTTCTGATACTGCACTTTTTCATTCTAACATTTTCATTTGTTCTTTTTTAGAGTTTCAGTT  
CTTTACTATTTCTCATCTGC

In100 candidate2841 (in intron):

LOCUS ENSG00000121879

DESCRIPTION Phosphatidylinositol-4,5-bisphosphate 3-kinase catalytic subunit  
alpha isoform (EC 2.7.1.153) (PI3-kinase p110 subunit alpha) (PtdIns-3- kinase  
p110) (PI3K). [Source:Uniprot/SWISSPROT;Acc:P42336]

CCTTTCTTTTTATTCTGCCTTCTGGAAAATTGCCTTAACTTTAACTTCAAACATTTGTTGATTTTTTTTTTTTTTTCAGTT  
CTTATTCTCTGGTCTTATTG



In100 candidate2842 (in intron):

LOCUS ENSG00000121879

DESCRIPTION Phosphatidylinositol-4,5-bisphosphate 3-kinase catalytic subunit alpha isoform (EC 2.7.1.153) (PI3-kinase p110 subunit alpha) (PtdIns-3-kinase p110) (PI3K). [Source:Uniprot/SWISSPROT;Acc:P42336]

GGTTGTCTGTAACTTTGATGATTCTTTCTTTTGTTATGCAGAGGCTTTTAGTTTAATTAGGTCCCATTTATTTTGTTT  
GTTTTTGTGCGCATTTGCTTT

In100 candidate2843 (in intron):

LOCUS ENSG00000137513

DESCRIPTION Probable asparaginyl-tRNA synthetase, mitochondrial precursor (C6.1.1.22) (Asparagine--tRNA ligase) (AsnRS).

[Source:Uniprot/SWISSPROT;Ac:Q96I59]

CCTTAATTCCCAAGGATTAACACAAATGGAGGTTTTTTTCCATGCTCTTTCCATTGAGAAATTTGTGTCCTCGCTCAGAT  
TTAGGTATCTCCCATATTTTC

In100 candidate2844 (in intron):

LOCUS ENSG00000137513

DESCRIPTION Probable asparaginyl-tRNA synthetase, mitochondrial precursor (C6.1.1.22) (Asparagine--tRNA ligase) (AsnRS).

[Source:Uniprot/SWISSPROT;Ac:Q96I59]

TGACTTTTTTATTCTTATAACCCTCTACTCCCTTGACTTCTGTGACATCACATTATCCCTGTTTTTCTCCTTTCTCAGCA  
TTTATTCTTTCTTAGTCTCC

In100 candidate2845 (in intron):

LOCUS ENSG00000149256

DESCRIPTION Teneurin-4 (Ten-4) (Tenascin-M4) (Ten-m4) (Protein Odd  
Oz/tenmhomolog

4). [Source:Uniprot/SWISSPROT;Acc:Q6N022]

CCCTTATCCCCTTCCCATAGATAACCACTTTTTGTGTTTTTTGTGTATCCTCTCAGGGTTTCTTTCTGCAAATAGAAGTCT  
ATATTTTTGCCTTTTTCCCT

In100 candidate2846 (in intron):

LOCUS ENSG00000149256

DESCRIPTION Teneurin-4 (Ten-4) (Tenascin-M4) (Ten-m4) (Protein Odd  
Oz/tenmhomolog

4). [Source:Uniprot/SWISSPROT;Acc:Q6N022]

GATAATTGGCACTCCCCTGGGAACTAACTTGGCCCCTTCTTTTGTTTTGTTTTTTTACCTTTTTCCCTTATTCAGTAG  
CCATTTGCTTCATGCCTTTT

In100 candidate2847 (in intron):

LOCUS ENSG00000079691

DESCRIPTION Leucine rich repeat containing 16.

[Source:Uniprot/SPTREMBL;AccQ5VZK9]

CCACTGCACCACCCTAAATGCTTTTATTTAGTGAGAGCCATAACATCATATTGTTTCCATATTCTTTTCATCTTCCAGGA  
AATTCCTAAGCTTTTTTTTTT

In100 candidate2848 (in intron):

LOCUS ENSG00000198393

DESCRIPTION Zinc finger protein 26 (Zinc finger protein KOX20).

[Source:Unirot/SWISSPROT;Acc:P17031]

ACTTGTTTGCTAACATCATCTGGATCATCTGTGCATCTTTATCAATTATCTGCCTATTCCTTTTGTTCAGTCATATTTTCC  
TGCCTCATGTCTCAAAGTTT

In100 candidate2849 (in exon):

LOCUS ENSG00000188177

DESCRIPTION Zinc finger CCCH domain-containing protein 6.

[Source:Uniprot/SISSPROT;Acc:P61129]

TTGATCCAAGTCTTCACCATTTTGTAGCTATTGTGTAAGTGAAGCAATTCTTTTCACTCTTGTGACTATCTCAGTCCTC  
TGCTGTTTTGTAACTGGTTT

In100 candidate2850 (in intron):

LOCUS ENSG00000197321

DESCRIPTION Supervillin (Archvillin) (p205/p250).

[Source:Uniprot/SWISSPROTAcc:O95425]

TGCCAAATTTTATAAGATGAGGGGACTAGTACCACTAACCTTCCGCATTCCTCTCTTTTCCTGTTGTCCATCTTTCAGCT  
TTTCTCAGCTATGTCTTTAT

In100 candidate2851 (in intron):

LOCUS ENSG00000197321

DESCRIPTION Supervillin (Archvillin) (p205/p250).

[Source:Uniprot/SWISSPROTAcc:O95425]

AACCACATCTGACAATAACTATCCTTACCTTTTGCTACCCCTTAAATTCAGACTTCTTTACCTTTGGCATTGGTTTGCTC  
CTGATTCCTCTCCAAAATAT

In100 candidate2852 (in intron):

LOCUS ENSG00000154262

DESCRIPTION ATP-binding cassette sub-family A member 6.

[Source:Uniprot/SWISPROT;Acc:Q8N139]

GACTATTAACTTCCTGACACAATTTTCCTGTTTGTTTTTTTCCTTTTAAATGTGACCTGTCAAATTTGTTCCCTCCAGTT  
TTTCTCGGGTTTATTCTTTT

In100 candidate2853 (in intron):

LOCUS ENSG00000150672

DESCRIPTION Discs large homolog 2 (Postsynaptic density protein PSD-93)  
(Chnnel- associated protein of synapse-110) (Chapsyn-110).

[Source:Uniprot/SWISPROT;Acc:Q15700]

AGGTTGGAAACCATAAATAACTTGTGCTTTTTTTTTCTTACTCCATCATTCATGACAGCCCCTGTTTCCTCTCCCGCTC  
GATTTATTTTCATTTATAGT

In100 candidate2854 (in intron):

LOCUS ENSG00000150672

DESCRIPTION Discs large homolog 2 (Postsynaptic density protein PSD-93)  
(Chnnel- associated protein of synapse-110) (Chapsyn-110).

[Source:Uniprot/SWISPROT;Acc:Q15700]

ATGGTAACTTGTTGCACTTGGTTTCAAGTGTCTTTTGTGCCTCCCCTTTTTTTCTTTTTGTTTTTAATCACCAGGATTT  
TTACTTTGCTAGTAATTTCC

In100 candidate2855 (in intron):

LOCUS ENSG00000150672

DESCRIPTION Discs large homolog 2 (Postsynaptic density protein PSD-93)  
(Chnnel- associated protein of synapse-110) (Chapsyn-110).

[Source:Uniprot/SWISPROT;Acc:Q15700]

TTTTCCTCTAGTTTCATCTCCTGTAACCTCTTATTAATTTCTATATTTTCAGTTCTACAGGCCTATTTCCCGCCTTAGGA  
CTTTTGTATTTGTCATCTTT

In100 candidate2856 (in intron):

LOCUS ENSG00000150672

DESCRIPTION Discs large homolog 2 (Postsynaptic density protein PSD-93)  
(Chnnel- associated protein of synapse-110) (Chapsyn-110).

[Source:Uniprot/SWISPROT;Acc:Q15700]

CTTGTGACAAAACATACTTTTGGTTCTTTTACTTCCTCAATAACTTCTTCATATTACTTGTTTATATTACTTTTTCAGCC  
TCCTCAGATTTATTTTCTTT

In100 candidate2857 (in intron):

LOCUS ENSG00000150672

DESCRIPTION Discs large homolog 2 (Postsynaptic density protein PSD-93)  
(Chnnel- associated protein of synapse-110) (Chapsyn-110).

[Source:Uniprot/SWISPROT;Acc:Q15700]

CCAATCATAGCTGTGCCATATGATCTTTGGAAAGACATCTAACCTTTCTGGGTTTCAATTTTCTTACCCATACAGACATT  
TCTTAAGAACTTTTATTTTT

In100 candidate2858 (in intron):

LOCUS ENSG00000150672

DESCRIPTION Discs large homolog 2 (Postsynaptic density protein PSD-93)  
(Chnnel- associated protein of synapse-110) (Chapsyn-110).

[Source:Uniprot/SWISPROT;Acc:Q15700]

GCTACCAATATTTAATAACAAATTGACTTGTTTTTACATGAACCCTTGTGCCTCTCTGATCTTTGTGTCATCTGTCAGCT  
GGAATTACTTTTGTCTTTCT

In100 candidate2859 (in intron):

LOCUS ENSG00000150672

DESCRIPTION Discs large homolog 2 (Postsynaptic density protein PSD-93)  
(Chnnel- associated protein of synapse-110) (Chapsyn-110).

[Source:Uniprot/SWISPROT;Acc:Q15700]

AGGTATGTAGTAGTATCTTACTGGGGTTTTAATTTTCATTTCTCTAACAAGTCATGATGTTGATTATCTTTTCAGATGCT  
TATTTGATACCTATATCTTC

In100 candidate2860 (in intron):

LOCUS ENSG00000150672

DESCRIPTION Discs large homolog 2 (Postsynaptic density protein PSD-93)  
(Chnnel- associated protein of synapse-110) (Chapsyn-110).

[Source:Uniprot/SWISPROT;Acc:Q15700]

AGTCCCAACTCTCCCCTTTGTTTCCTGACTCACGGGGTAACCTTGAACAAATTACTGTTTCCTTTCACAGTCTATTTTCTCA  
TTCCCCAGTGTTCTATACTT

In100 candidate2861 (in intron):

LOCUS ENSG00000150672

DESCRIPTION Discs large homolog 2 (Postsynaptic density protein PSD-93)  
(Chnnel- associated protein of synapse-110) (Chapsyn-110).

[Source:Uniprot/SWISPROT;Acc:Q15700]

GAAAAAAATAACAAAACCTATCCTTTTGACATTTTCTTTTCTTAAAGTATGACCCTCTATTTACCCTCCAGAACAA  
TCTTTTCGTATCTTAGTCTT

In100 candidate2862 (in intron):

LOCUS ENSG00000150672

DESCRIPTION Discs large homolog 2 (Postsynaptic density protein PSD-93)  
(Chnnel- associated protein of synapse-110) (Chapsyn-110).

[Source:Uniprot/SWISPROT;Acc:Q15700]

AGTAATAAATGACAAGATTAAGACTAAAAGCTGGCCTTCTAACATAGAGTTCCTTTTTTTTTTTAATTTTACTCCCAGTA  
CCTTTTTTTTTTTAATTATTA

In100 candidate2863 (in intron):

LOCUS ENSG00000150672

DESCRIPTION Discs large homolog 2 (Postsynaptic density protein PSD-93)  
(Chnnel- associated protein of synapse-110) (Chapsyn-110).

[Source:Uniprot/SWISPROT;Acc:Q15700]

AACACGGTAACATGTCAACATTTTACATTCTTTATACTTTTATAATTTTATTATTATCCTAATTTTCAGAAAAAAATTT  
GCCTCTCCCCTTTTTCATTT

In100 candidate2864 (in intron):

LOCUS ENSG00000154263

DESCRIPTION ATP-binding cassette sub-family A member 10.

[Source:Uniprot/SWSSPROT;Acc:Q8WWZ4]

TCCTGGGAATGGAACCTGCCACTAAGGTAAACAAAACATGTTTGCTTGTCTCTTTGCTTCTTAAATCAGGTGAATGCTTC  
TAGAGTTTTTCTTTATTTCC

In100 candidate2865 (in intron):

LOCUS ENSG00000154263

DESCRIPTION ATP-binding cassette sub-family A member 10.

[Source:Uniprot/SWSSPROT;Acc:Q8WWZ4]

TATTTATAGCTTATATTCAAATTATTCTCTTTAAAAGTAACTACCCTGTCCTCATTCTTTTAATTTTTTCTTCTTCAGTT  
TTCTGTGGGTCTTACTCTTC

In100 candidate2866 (in intron):

LOCUS ENSG00000106714

DESCRIPTION Contactin-associated protein-like 3 precursor (Cell  
recognitionmolecule Caspr3). [Source:Uniprot/SWISSPROT;Acc:Q9BZ76]

CTTTATGATTAGAATTTGTCCTGAAAGTTTCATAACTTTTTGTGGGACACCTGGATTTTAGTTTTTTTTTTCTAACAGAG  
TTATTGAATTCATTTTCTTT

In100 candidate2867 (in intron):

LOCUS ENSG00000058056



DESCRIPTION Ubiquitin carboxyl-terminal hydrolase 13 (EC 3.1.2.15) (Ubiquitin thioesterase 13) (Ubiquitin-specific-processing protease 13) (Deubiquitinating enzyme 13) (Isopeptidase T-3) (ISOT-3). [Source:Uniprot/SWISSPROT;Acc:92995]  
CTGAGAGCCACTGTGCCTGGCTACCCTTTTTATATTTTAACTTGCTGTTCACATTTGGGTCTCTCTTCACTCTCTCAGTT  
GTGTTCTGTTGATCTTATTT

In100 candidate2868 (in intron):

LOCUS ENSG00000154265

DESCRIPTION ATP-binding cassette sub-family A member 5.  
[Source:Uniprot/SWISPROT;Acc:Q8WWZ7]

TATTAGATTTAAATTAATTATGAATTACTATTTCATTTTGAAAGCTTTTTTAACTCTGGAAGATAGTATTTTTTATCAGAT  
TACACTTTTACCTATCACTT

In100 candidate2869 (in intron):

LOCUS ENSG00000101391

DESCRIPTION CDK5 regulatory subunit-associated protein 1 (CDK5 activatorbiding protein C42). [Source:Uniprot/SWISSPROT;Acc:Q96SZ6]  
GGAAAACCTCTTTATTTTGAGGAGGAGTGTAACATGTGGATTTAACTTATTTTCCCTTCAGGCTGATGAACACTATCAG  
TTAGCCCTTCCTTTTCTTTT

In100 candidate2870 (in intron):

LOCUS ENSG00000114757

DESCRIPTION PEX5-related protein (Peroxin-5-related protein) (Pex5Rp)  
(PEX5like protein) (PEX2-related protein).  
[Source:Uniprot/SWISSPROT;Acc:Q8IYB4]EXON  
GGGGATATTTATAATACCTTGCTAACTTTTAGCTTCATTAGTTGCTAAGCATTTTCTTTCTCACTGTATTCATTTTCAGTT

GGTCATCATTTCCCTTTTCA

In100 candidate2871 (in intron):

LOCUS ENSG00000165757

DESCRIPTION Novel protein. [Source:Uniprot/SPTREMBL;Acc:Q5T992]

ATAACATCTGCATCACTTCAAGGTTCACTTCTACCTTTTTGCTCTCTGTTGCCAGTTCACCAGAAGCCCCTGTGATGATT  
ACTATTCTTTTTTTTTTTTTTT

In100 candidate2872 (in intron):

LOCUS ENSG00000153822

DESCRIPTION Inward rectifier potassium channel 16 (Potassium channel, inwardly  
rectifying subfamily J member 16) (Inward rectifier K(+) channel Kir5.1)  
[Source:Uniprot/SWISSPROT;Acc:Q9NPI9]

TGCTTGTAACACTTTCTTTACTTCGTATCACATGTCACAATTTTTCTCCTACTTCAAGCAATCTTTTTCTCAGTCTTC  
TTAGTTATAGCCTCCTCATT

In100 candidate2873 (in intron):

LOCUS ENSG00000145075

DESCRIPTION Coiled-coil domain-containing protein 39.  
[Source:Uniprot/SWISSROT;Acc:Q9UFE4]

ATATTGGAGGGTGGAATATTTTATCTCCTAACTGATATTATACTCTTTTGTTTCCTCTTCCTGCAAAACAGTTCATTCCTG  
CCTTCTCAGCATTTTCTTTT

In100 candidate2874 (in intron):

LOCUS ENSG00000078699

DESCRIPTION Protein CBFA2T2 (MTG8-like protein) (MTG8-related protein 1)  
(Meloid translocation-related protein 1) (ETO homologous on chromosome 20) (p5).  
[Source:Uniprot/SWISSPROT;Acc:O43439]

AGTGAATATTTATATCACTCCGAAAAGAAACCCCATACCCATTAACAATTACTGTCTATTTTTCCTTTCCCCAGTCCCTA  
ATCTACTTTTTTATTTTCC

In100 candidate2875 (in intron):

LOCUS ENSG00000133195

DESCRIPTION solute carrier family 39 (metal ion transporter), member 11  
[Sorce:RefSeq\_peptide;Acc:NP\_631916]

CATACCTCATAGCTTCACTTAACAAAAACATATCTTTTTTTTCCTTGCATATGGAGTTGTTTCCCATATTATTCCAGTT  
TTTTTTTTTTTTTTGGAGACA

In100 candidate2876 (in intron):

LOCUS ENSG00000133195

DESCRIPTION solute carrier family 39 (metal ion transporter), member 11  
[Sorce:RefSeq\_peptide;Acc:NP\_631916]

GCATCACACTCTTGGGTGGTGGGAAGAGAATGGTTAACACATGACTGTGTTCTTTAACTCCATTTCTGTTCCCTTCAGCC  
TTTCAGATTTATCTGTCCCT

In100 candidate2877 (in intron):

LOCUS ENSG00000133195

DESCRIPTION solute carrier family 39 (metal ion transporter), member 11  
[Sorce:RefSeq\_peptide;Acc:NP\_631916]

ATATTGTTTTGACCTCTAACACTGTGCTGTGTGTATGTCTTTTCAGATTTTTTTTTTCCACAAAAAATCTGTTCAAATTCC  
CCACCCCCAACTTTTTTTTTT

In100 candidate2878 (in intron):

LOCUS ENSG00000133195

DESCRIPTION solute carrier family 39 (metal ion transporter), member 11

[Source:RefSeq\_peptide;Acc:NP\_631916]

AGAGATTGCAATTAAAGTAACCAAGTATTGTCTTATTGTCACATTTTTATTAAACTCCTTCTTGACTGTGTCTTCCAGAC  
CTTCTTATAATCATTATCT

In100 candidate2879 (in intron):

LOCUS ENSG00000073921

DESCRIPTION Phosphatidylinositol-binding clathrin assembly protein (Clathrin assembly lymphoid myeloid leukemia protein).

[Source:Uniprot/SWISSPROT;AccQ13492]

CATAAGCTATCCTTGTAACATTTCCATCAACTCTCTCATTTGTTGACATCTGTTTTACCTTGTTTTGAATTATTCCAGGA  
CATTTTTTTGTTGTTGTTTC

In100 candidate2880 (in intron):

LOCUS ENSG00000058063

DESCRIPTION Probable phospholipid-transporting ATPase IF (EC 3.6.3.1) (ATPase class I type 11B) (ATPase IR). [Source:Uniprot/SWISSPROT;Acc:Q9Y2G3]  
CAACCCTCTTTTCCAAGATAACAATTCCACTTAAGCTTTTGATCCTTTTCTTTCATTCTGCTGTCCATACTCCATCAGTT  
ATCATTAGTATGTTTCTTTT

In100 candidate2881 (in intron):

LOCUS ENSG00000058063

DESCRIPTION Probable phospholipid-transporting ATPase IF (EC 3.6.3.1) (ATPase class I type 11B) (ATPase IR). [Source:Uniprot/SWISSPROT;Acc:Q9Y2G3]  
TTTAAAGACTTCTCCTCTGTAACTGTGAAATCCTTGAAGTCCATTTATTCTTTGTCTTTGTTCCCAGAACCTATCTCA  
ATGTCTGTTTCACAGTTTCT

In100 candidate2882 (in intron):

LOCUS ENSG00000167554

DESCRIPTION Zinc finger protein 610. [Source:Uniprot/SWISSPROT;Acc:Q8N9Z0]  
EXON  
TATAATGAAGTTACATGATATAACTTCATTATTTGTCTTTTTGTCTTTGTATGACTGGCTTATTTCACTTACCAGAGTGT  
CTTTCAGGTTCATCCATTTT

In100 candidate2883 (in intron):

LOCUS ENSG00000141219

DESCRIPTION lung cancer-related protein 8  
[Source:RefSeq\_peptide;Acc:NP\_06011]  
TAGTCACAAAGTCAAGCCCCTTCTCCGTAATAAACACATTTAATTATATTAACATTTGTGTTGCTTTGTGGTTTTTCAGAG  
TGCCTCCATCTGTATTTTTT

In100 candidate2884 (in intron):

LOCUS ENSG00000183621

DESCRIPTION Zinc finger protein 438. [Source:Uniprot/SWISSPROT;Acc:Q7Z4V0]

EXON

AGTGGGGCATCCTGTATATTATCTGGCAAACCTTAACCTCACTTTCTGTGAATTGTCTGCCTCTGCCTTTTTGTCAGATT  
TCAGTTGCACTTTCTATCTT

In100 candidate2885 (in intron):

LOCUS ENSG00000053524

DESCRIPTION Rho family guanine-nucleotide exchange factor

[Source:RefSeq\_petide;Acc:NP\_055893]

TGTTTCTGAACAACAACAAAAATTTTCCGTAACCAACCTGTTGAATATTCACACTTCCCTTCAATTTTCAGTTCATTGT  
GATAGATTTTTCCTTGTTTC

In100 candidate2886 (in intron):

LOCUS ENSG00000053524

DESCRIPTION Rho family guanine-nucleotide exchange factor

[Source:RefSeq\_petide;Acc:NP\_055893]

GTTTAAATGGCTTTATTATATGCATTTTACATATAACCTCTTCATCTTTTCTTTTATCTTCTACACCTTCTGGAACAGTT  
CATCTGATTTATTGTCTTTA

In100 candidate2887 (in intron):

LOCUS ENSG00000149201

DESCRIPTION coiled-coil domain containing 81

[Source:RefSeq\_peptide;Acc:NP\_68599]

GCTTGGCCTATTCATGCTCTTCTAACATGCCTGCCCTTCCCCAACTTCATCCTTTTGTTCAATTTTTTTTTTCTGCAGCC  
TGAATTGTCCTTCCTTTTCT

In100 candidate2888 (in intron):

LOCUS ENSG00000148516

DESCRIPTION Transcription factor 8 (NIL-2-A zinc finger protein) (Negative  
regulator of IL2). [Source:Uniprot/SWISSPROT;Acc:P37275]

TCTGTTTTATTTTATCACCTATTCCTATTCCTTGAAAATTCGTTATAAGTAACCTGTGCCTTATTTTTGTTTTTACAGAT  
CTCGCTTTTAAATACTCCTT

In100 candidate2889 (in exon):

LOCUS ENSG00000148516

DESCRIPTION Transcription factor 8 (NIL-2-A zinc finger protein) (Negative  
regulator of IL2). [Source:Uniprot/SWISSPROT;Acc:P37275]

AACTGTTTCCAAATGTTAGTTATTATGGACCCAATTTATTAACAACATTAGCTGATTTTTACCTATCAGTATTATTTTAT  
TTCTTTTAGTTTATAGATCT

In100 candidate2890 (in intron):

LOCUS ENSG00000151376

DESCRIPTION NADP-dependent malic enzyme, mitochondrial precursor (EC 1.1.1.0)  
(NADP-ME) (Malic enzyme 3). [Source:Uniprot/SWISSPROT;Acc:Q16798]

TCTGTCTGATATAACTAACCTGTTCTTCTTTGGTTTACATTTGCGTGGAATATCTTTTCCATCCCTCCACTTTCAGTT  
TCTGGTTTTTTTTTTGGTTTG

In100 candidate2891 (in intron):

LOCUS ENSG00000172578

DESCRIPTION Kelch-like protein 6. [Source:Uniprot/SWISSPROT;Acc:Q8WZ60]

CATTTACCAAACCTTTAACCCTCTTGTCCTATCATCATCTTTCCCATTTTGTGTTTATTTGTGTTTGTGTTTTCTTCAGAC  
AGACTTTTGTTCCTTGTTGCC

In100 candidate2892 (in intron):

LOCUS ENSG00000114796

DESCRIPTION Kelch-like protein 24 (Protein DRE1).

[Source:Uniprot/SWISSPROTAcc:Q6TFL4]

AATTAAAATTTTAAAAATTGACATTCTGCAAAAATGCTGATATTATATAACTGCACTACATCCTCTGCCTTTATTCAGAG  
TGCCCTTAGCATCTTTTTTTT

In100 candidate2893 (in intron):

LOCUS ENSG00000163872

DESCRIPTION YEATS domain-containing protein 2.

[Source:Uniprot/SWISSPROT;Ac:Q9ULM3]

ATTTTTCCTGTCATTTTTTAGTTAACTCTTGGAGCCATCTTTGATTCTTCCCTCTTCTAAATATTTGTTTAGTTGCAGAC  
CATCATTCTTTCTTCATAAT

In100 candidate2894 (in intron):



LOCUS ENSG00000166575

DESCRIPTION transmembrane protein 135 (TMEM135), mRNA

[Source:RefSeq\_dna;Ac:NM\_022918]

ATTTTCTTAATCACTCTTTAACATTTTCCTACTTTTTCATCTCTTTGTGCTGAATTCTGGTTATCTTTTCAGATTTGTCT  
TCAAGTTAACTCATCTATTT

In100 candidate2895 (in intron):

LOCUS ENSG00000165322

DESCRIPTION Rho GTPase-activating protein 12.

[Source:Uniprot/SWISSPROT;AccQ8IWW6]

AATGTAGCTTTATAGTAAGTGTTGAAAGTAACTAATATGTGTCTTCCTACTTGGTTGTACTTCAGTATTGTGTTGGCTGT  
TCTAAGTCTTTTGCTTTTCC

In100 candidate2896 (in intron):

LOCUS ENSG00000165322

DESCRIPTION Rho GTPase-activating protein 12.

[Source:Uniprot/SWISSPROT;AccQ8IWW6]

TGTATGTTAATTTAACCTTCTGATTGTTTCTTGAATCTGTCCCTGCTTCTGCATTCCTACTGTCTTGCCTATTGCAGCT  
CTCTTCATCTTCTGTCTGTA

In100 candidate2897 (in intron):

LOCUS ENSG00000165322

DESCRIPTION Rho GTPase-activating protein 12.

[Source:Uniprot/SWISSPROT;AccQ8IWW6]

CCATGTGACTTCTGTTAAGATACCTGTCTTAACTCTGATGAAATTTTACTTAATTTCTGTATTTATACTCATTCAGTC  
TTTTCTGTTGCTGATCATGC

In100 candidate2898 (in intron):

LOCUS ENSG00000154529

DESCRIPTION Contactin associated protein-like 3B.

[Source:Uniprot/SPTREMBL;cc:Q5RGR9]

TGATTAGAATTTGTCCTGAAAGTTTCATAACTTTTTGCGGGACACCTGGATTTATTTTAGTTTTTTTTTTTCTAACAGAG  
TTATCGAATTCATTTTCTTT

In100 candidate2899 (in intron):

LOCUS ENSG00000158352

DESCRIPTION shroom family member 4 [Source:RefSeq\_peptide;Acc:NP\_065768]

AGCACTTAACATTGTTGAACATTATTGTCTTCTAAAAATTTTATCTTCCTTTGGCTCCAGAAACACTATGCTTCCCCTGG  
TTTTTCTTTGCTTTCTCTTG

In100 candidate2900 (in intron):

LOCUS ENSG00000172794

DESCRIPTION Ras-related protein Rab-37. [Source:Uniprot/SWISSPROT;Acc:Q96AX]

AGCATCCCCCTACCTGGGTCCCACTGTAACATATCATCTTGTTCTGTTTTCTCACAGTACTTATCACTTCTCACTTCTT  
GAAATTATTTTTTTGTTTTTC

In100 candidate2901 (in intron):

LOCUS ENSG00000175497

DESCRIPTION Inactive dipeptidyl peptidase 10 (Dipeptidyl peptidase X)  
(Dipeptidyl peptidase-like protein 2) (DPL2) (Dipeptidyl peptidase IV-related  
protein 3) (DPRP-3). [Source:Uniprot/SWISSPROT;Acc:Q8N608]  
CATACTGACATACTGATTCTTTGAAGAGAACTTGGGGTTCACTATATTTAACAATCCCCATCTTGAATTTTTTCAGTT  
CTTCTCTTCAGACTTCCTT

In100 candidate2902 (in intron):

LOCUS ENSG00000175497

DESCRIPTION Inactive dipeptidyl peptidase 10 (Dipeptidyl peptidase X)  
(Dipeptidyl peptidase-like protein 2) (DPL2) (Dipeptidyl peptidase IV-related  
protein 3) (DPRP-3). [Source:Uniprot/SWISSPROT;Acc:Q8N608]  
TAGCTCTCTTTTATTAGTTATTTTGGCCAATCCCTGTAGAGGATATCTTAAGTATTTTATTTAATTCTTACAGCAA  
ACCTCCTTTTTGTTATCCAT

In100 candidate2903 (in intron):

LOCUS ENSG00000175497

DESCRIPTION Inactive dipeptidyl peptidase 10 (Dipeptidyl peptidase X)  
(Dipeptidyl peptidase-like protein 2) (DPL2) (Dipeptidyl peptidase IV-related  
protein 3) (DPRP-3). [Source:Uniprot/SWISSPROT;Acc:Q8N608]  
CTCTAGCATACATGTCTTTGCCTTAACATTTGCCTTTCTTTCTTTTGGGTCTTTCTATACACAGCATTTTCAACATGTG  
TCATCTTGATCTGCCTTTTC

In100 candidate2904 (in exon):

LOCUS ENSG00000168930

DESCRIPTION Tripartite motif-containing protein 49 (RING finger protein  
18)(Testis-specific ring-finger protein). [Source:Uniprot/SWISSPROT;Acc:Q9NS80]

ACTTGGAGTGAAGTCTCAATGATAACTGGGAAATGTTTTCTTCCTCTTTATCTAACTATATTACACTTATCCATCAGGT  
TTCATTGTATTAATCTATCC

In100 candidate2905 (in exon):

LOCUS ENSG00000173827

DESCRIPTION Tripartite motif-containing 49.

[Source:Uniprot/SPTREMBL;Acc:A0VR7]

ACTTGGAGTGAAGTCTCAATGATAACTGGGAAATGTTTTCTTCCTCTTTATCTAACTATATTACACTTATCCATCAGGT  
TTCATTGTATTAATCTATCC

In100 candidate2906 (in intron):

LOCUS ENSG00000198346

DESCRIPTION ZNF765 protein. [Source:Uniprot/SPTREMBL;Acc:Q7L2R6]

TAAAATGGGACACATCCAAATATGGCAAACCTTCATACTAGAAAGTAACTTTATTAAGTATTTCTATTGCATTTTCAGCT  
GACTTTATTTTTTATTTT

In100 candidate2907 (in intron):

LOCUS ENSG00000180773

DESCRIPTION solute carrier family 36 (proton/amino acid symporter), member

[Source:RefSeq\_peptide;Acc:NP\_689526]

CTTAAATGTCACCTGTTCTGTGAAACCTTTCTTAACTGTTTCCTTCATGTCTTCCTTTTCTTTATCTCTAGCCAGAATTT  
ATTGGTTTTTGTCTGGCTT

In100 candidate2908 (in intron):

LOCUS ENSG00000204794

DESCRIPTION

ACTATTTAGTAACCATTCTGGTTATTTTTACTACTGAATTGATCCTTTAATTATTCTATTTCCCCTTCTCCTCCCCAGTT  
TTTCATCTCTTTATTTTGTT

In100 candidate2909 (in intron):

LOCUS ENSG00000184770

DESCRIPTION

ACTATTTAGTAACCATTCTGGTTATTTTTACTACTGAATTGATCCTTTAATTATTCTATTTCCCCTTCTCCTCCCCAGTT  
TTTCATCTCTTTATTTTGTT

In100 candidate2910 (in intron):

LOCUS ENSG00000163075

DESCRIPTION

TCCACTATTTATCTTCCTGTGGTTTTAACCATGTATTTTATGTGATTCCATTTTCTCTCTTTTCTTTTAGCATACCAGTT  
ATATTTCTTTGTTTCCTTTT

In100 candidate2911 (in intron):

LOCUS ENSG00000150076

DESCRIPTION Coiled-coil domain-containing protein 7.

[Source:Uniprot/SWISSPOT;Acc:Q96M83]

AACTCCTTCAATTCCTGCTACCTAACACAATATTAACGTCTGTACTCATTTTCTCTTTCTTTTTTCCTGTTAAGACAGAT  
ATATTGTTCTTTCTTATACA

In100 candidate2912 (in intron):

LOCUS ENSG00000150076

DESCRIPTION Coiled-coil domain-containing protein 7.

[Source:Uniprot/SWISSPOT;Acc:Q96M83]

CTTATCTCGATGCATATTATTTAAAATTGTTATAACCTCTTGATGGATTGACCCCTTTATAATTTTTTTTATGCCCAGCT  
AATTTTTATTTATTTATTTA

In100 candidate2913 (in intron):

LOCUS ENSG00000150076

DESCRIPTION Coiled-coil domain-containing protein 7.

[Source:Uniprot/SWISSPOT;Acc:Q96M83]

TACCATTATGTAACGGCCTTCTTTGTCTCTTTTTATCTTTGTTGGTTTAAAGTCTGTTTTGTCAGATACTAGGATTGCAA  
CCCTTACCTTTTTTTTGTTTT

In100 candidate2914 (in intron):

LOCUS ENSG00000088179

DESCRIPTION Tyrosine-protein phosphatase non-receptor type 4 (EC 3.1.3.48)

Protein-tyrosine phosphatase MEG1) (PTPase-MEG1) (MEG).

[Source:Uniprot/SWISPROT;Acc:P29074]

AGGAGCTTAGACTTGATTTGAGACCTTCCCTTTTTTTAATGTAACATTTAGGTTTATAAATTTTCCTCTCAGCTCTGCTT  
TGGCCTTATTCCACAAGTTT

In100 candidate2915 (in intron):

LOCUS ENSG00000078747

DESCRIPTION E3 ubiquitin-protein ligase Itchy homolog (EC 6.3.2.-) (Itch)  
(trophin-1-interacting protein 4) (AIP4) (NFE2-associated polypeptide 1) (NAP1).  
[Source:Uniprot/SWISSPROT;Acc:Q96J02]

TAATTTTAACTATTTTCAAAAATAATCTTATATTTACTCACATTACTATTTCTGGTTCTCCTTATTTCTTTCCTCAGAT  
TCATTTTTTTTTTTTAAATCT

In100 candidate2916 (in intron):

LOCUS ENSG00000163882

DESCRIPTION DNA-directed RNA polymerases I, II, and III 17.1 kDa polypeptid  
(EC 2.7.7.6) (RPB17) (RPB8) (RPABC3). [Source:Uniprot/SWISSPROT;Acc:P52434

AAAAGGCTGTGTGTGTGTGTGTGTGTGTGTGGCTACTCTGTAACCCAATCCCTAGTTCCTTGGTTTTCTGTCCAGCT  
ATTTTTTCTTTTCTTTAAAG

In100 candidate2917 (in intron):

LOCUS ENSG00000115109

DESCRIPTION Band 4.1-like protein 5. [Source:Uniprot/SWISSPROT;Acc:Q9HCM4]

EXON

AGTTTTTCTGTATGTTTAAACATTTTTTATAACGATGAAAATTTTTTTTTTTGAATCCAGTTCTTTCATTTTCCTCTGCTCA  
GTAATTTGACTGCTATACTT

In100 candidate2918 (in intron):

LOCUS ENSG00000144118

DESCRIPTION Ras-related protein Ral-B. [Source:Uniprot/SWISSPROT;Acc:P11234

TCTGTCATTGACTGAAACTTCTTTATTTGGTGCATGACTGTATAACAACATTTTTTGTGTATATTTTCTCTCAGGTCTT

TGTTTTAGAGCTTGTGCTCT

In100 candidate2919 (in intron):

LOCUS ENSG00000177885

DESCRIPTION Growth factor receptor-bound protein 2 (Adapter protein GRB2)  
(H2/SH3 adapter GRB2) (Protein Ash). [Source:Uniprot/SWISSPROT;Acc:P62993]

AGTAACATAGTGAAAGTTTTTTCTTCGTTTTAACAGTGGCTTTATTTTCAACTAATTTATTCTTTAGTTTAATAGTGG  
ACTTTTTATTTCCTTTTTTTTT

In100 candidate2920 (in intron):

LOCUS ENSG00000074047

DESCRIPTION Zinc finger protein GLI2 (Tax helper protein).  
[Source:Uniprot/WISSPROT;Acc:P10070]

TGTTTATAACTATATCCCCTTTTTCATTCTCTATGTTATTTATTTGTCCCTTCCCTGTTTCTTGGTTAGTCTTCACAGAG  
TTTTATTTTTTTATTTATTTT

In100 candidate2921 (in exon):

LOCUS ENSG00000166025

DESCRIPTION Angiomotin-like protein 1. [Source:Uniprot/SWISSPROT;Acc:Q8IY63]

AGGATAGATTATGATCTCGGTCCCCATCCATCCTAACTTCTGAGTTCATCTCTGTCTCTGCTTTACAGTCTTTAATTTTT  
TGTTGTTTCCTTCATTTTTTT



In100 candidate2922 (in intron):

LOCUS ENSG00000156931

DESCRIPTION Vacuolar protein sorting-associated protein 8 homolog.

[Source:niprot/SWISSPROT;Acc:Q8N3P4]

CTAATAAATATTGTTGTTCCCCTTAACAAATGTGTTTTTCTGTGTCCATGATTTGCTCTCACTCTTCTCTTTGCCAGGT  
TTGCCTTCTCTGTTGACATT

In100 candidate2923 (in intron):

LOCUS ENSG00000074054

DESCRIPTION CLIP-associating protein 1 (Cytoplasmic linker-associated protein  
1) (Multiple asters homolog 1) (hOrbit1). [Source:Uniprot/SWISSPROT;Acc:QZ460]

AGTAACATTTTCTTCATCATTTCTAATTGTGTTTATTTGGATCTTCCCTTTTTTCTTCTTTGTTAGTCTAGCTAGCAGCC  
TATTTATCTTATTAATTTTT

In100 candidate2924 (in intron):

LOCUS ENSG00000074054

DESCRIPTION CLIP-associating protein 1 (Cytoplasmic linker-associated protein  
1) (Multiple asters homolog 1) (hOrbit1). [Source:Uniprot/SWISSPROT;Acc:QZ460]

TAGAGTTTATTTATAAGTTTTTCCTTAAACTGAAAAGTCATTGATTCTTAACTAGTTTTATTATTTTTTTAATGCCAGCT  
TTCTTTCATTGCTCTTTACC

In100 candidate2925 (in intron):

LOCUS ENSG00000074054

DESCRIPTION CLIP-associating protein 1 (Cytoplasmic linker-associated protein  
1) (Multiple asters homolog 1) (hOrbit1). [Source:Uniprot/SWISSPROT;Acc:QZ460]

AGCCACATTTATTATGATTAACATAATATGTTTGAGCTTCTATCTTATTTTGTGATTTTTATTACCAGGTTTCTGGTTAT

TTTATCCCCCTACTCCCTTT

In100 candidate2926 (in intron):

LOCUS ENSG00000073803

DESCRIPTION Mitogen-activated protein kinase kinase kinase 13 (EC 2.7.11.25  
(Mixed lineage kinase) (MLK) (Leucine zipper-bearing kinase).

[Source:Uniprot/SWISSPROT;Acc:O43283]

TGTATTATAACTTAAATTAGGTTTGTTTTGTTTGGTCCCCTTTATTATTTCTCAGATGCAACAGGCATTTCTAATTCAAT  
ATTATTTCTTTTTTTTTTTTTT

In100 candidate2927 (in intron):

LOCUS ENSG00000211460

DESCRIPTION Translin. [Source:Uniprot/SWISSPROT;Acc:Q15631]

AGTAACTTGCTGGTTGCTTTTTTGATCTTTCTGCTTCACTGTCAGTTTTTTTTTTTTTTTTTTTTTTGAGACAGAGTCC  
CGCTCTGTCGCCTAGGCTGG

In100 candidate2928 (in intron):

LOCUS ENSG00000101464

DESCRIPTION GPI transamidase component PIG-U (Phosphatidylinositol-glycan  
biosynthesis class U protein) (Cell division cycle protein 91-like 1) (CDC91-like  
1 protein). [Source:Uniprot/SWISSPROT;Acc:Q9H490]

CTCTCTACTCTGGAAACTGATAATAGTAAGGTTTAACTTAATTTTTTTTACATGTCTGTTTTTTTTCTGCAGACTCCATT  
AATAATATACCTCTTTCATT

In100 candidate2929 (in intron):

LOCUS ENSG00000101464

DESCRIPTION GPI transamidase component PIG-U (Phosphatidylinositol-glycan  
biosynthesis class U protein) (Cell division cycle protein 91-like 1) (CDC91-like  
1 protein). [Source:Uniprot/SWISSPROT;Acc:Q9H490]

AATTTATAACTTTTGTCTTTTTTCTCTCCCTTTGTTTTCTTAATTCAGACTTTCTGTTCCAGATCTCACTCCAAACATT  
GGTCTTTTCTGGTACTTCTT

In100 candidate2930 (in intron):

LOCUS ENSG00000073792

DESCRIPTION Insulin-like growth factor 2 mRNA-binding protein 2 (IGF-II  
mRNbinding  
protein 2) (IMP-2) (Hepatocellular carcinoma autoantigen p62).

[Surce:Uniprot/SWISSPROT;Acc:Q9Y6M1]

TGGTCAAATCTGCTGTTGAACTCCTTTAACAAATTTTTCTGTTCAATTGTATTTTTCAGCTCCAGAATTTGTTAGGTTCT  
TTCTTATAGTTTCTGTCTCT

In100 candidate2931 (in intron):

LOCUS ENSG00000155052

DESCRIPTION contactin associated protein-like 5 isoform 1

[Source:RefSeq\_petide;Acc:NP\_570129]

TTTGGATCTAAGAATCTTATTACTCTTTAACATGTCCTTATCCTTTTGCTTTTTCTCAGTCTGTTTCAGTTGTACTTATTT  
TTCATGCCAATTGTTACCC

In100 candidate2932 (in intron):

LOCUS ENSG00000155052

DESCRIPTION contactin associated protein-like 5 isoform 1

[Source:RefSeq\_petide;Acc:NP\_570129]

AGAGCAACATTTTAAGGAAAAGAAAACCTTCTTATTTAACATCATCCTTCCCTTCTTTAAATCAGCAATCAGCATTTTTTTT  
TTTTTGAGCTTTGGTTTTCC

In100 candidate2933 (in intron):

LOCUS ENSG00000155052

DESCRIPTION contactin associated protein-like 5 isoform 1

[Source:RefSeq\_petide;Acc:NP\_570129]

CTAGGTTCTCTAGTTTATGTGCATAAAGGTGTTTCATAATAACCTTTAATAATCTTTTGTATTTTGTGTTATCAGTAGTA  
ATACCTCCTGTTTCATTTCT

In100 candidate2934 (in intron):

LOCUS ENSG00000155052

DESCRIPTION contactin associated protein-like 5 isoform 1

[Source:RefSeq\_petide;Acc:NP\_570129]

AACAAATTTGGTAACCTGAGTAGGATATTTAAATATTTCTATCTATCTACTCTTCCAGCAATGTATTGCCCACTCCTTTA  
CTGTTTTATGTTTCACCAT

In100 candidate2935 (in intron):

LOCUS ENSG00000087053

DESCRIPTION Myotubularin-related protein 2 (EC 3.1.3.-).

[Source:Uniprot/SWISSPROT;Acc:Q13614]

GGTATTATAGATAACCTTGAAGCTAACTTGATTTTGCTTCTTCAAAGGTAATTTTTTTTCCACCTATATTCTTACAGTT  
TATATTTTAATTCTTTTAGT

In100 candidate2936 (in intron):

LOCUS ENSG00000198646

DESCRIPTION Nuclear receptor coactivator 6 (Amplified in breast cancer protein  
3) (Cancer-amplified transcriptional coactivator ASC-2) (Activating signal  
cointegrator 2) (ASC-2) (Peroxisome proliferator-activated receptor-interacting  
protein) (PPAR-interacting protein) [Source:Uniprot/SWISSPROT;Acc:Q1468]

TTTCATAGAACTATGAATTATACATTGTTGAATGCATAACTATGCATTGTAATGCTCTTTTGCATCTTCTCTTTTCAGAA  
GTTTTCTTATTGTCCTCTTG

In100 candidate2937 (in intron):

LOCUS ENSG00000161526

DESCRIPTION SAP30-binding protein (Transcriptional regulator protein HCNGP)  
[Source:Uniprot/SWISSPROT;Acc:Q9UHR5]

TGTGGACTGTCTCACCCTAAAGTAACTTGACTTTGAGCTGCTGATGCTTTTTTGTGTTTTTGTGTTTTTCCCCTCCAGAA  
TATCTCTTTTTCCCCTTATT

In100 candidate2938 (in intron):

LOCUS ENSG00000161526

DESCRIPTION SAP30-binding protein (Transcriptional regulator protein HCNGP)  
[Source:Uniprot/SWISSPROT;Acc:Q9UHR5]

TTATCCCTACCTGATAACATTTTATGTGCTTATGTTTTTTTGTCCATGTCTGTCCCTTGTTCTAATCCCCACCTACAGAA  
TTTTTCCTTCTTCTCTCAAC

In100 candidate2939 (in intron):

LOCUS ENSG00000149972

DESCRIPTION Contactin-5 precursor (Neural recognition molecule NB-2) (hNB-2).

[Source:Uniprot/SWISSPROT;Acc:O94779]

AGCTCCTGGATTCATTAAC TTTTGAAGGGTTTTTTTGGTCTCTATTTCTTCAGTCCTGCTCTGATTTTAGTTATATCT  
TGCCTTCTGCTAGCTTTTGA

In100 candidate2940 (in intron):

LOCUS ENSG00000171656

DESCRIPTION ETS translocation variant 5 (Ets-related protein ERM).

[Source:niprot/SWISSPROT;Acc:P41161]

GGCTTTTAAAAAATTATACTTGAATACAATTTTCTAACCCTGGAATGCCTCTTTTCCGTTTCGTTTATGGCAGTTTAT  
TTCTTTTAATTTTTTTAGAAT

In100 candidate2941 (in intron):

LOCUS ENSG00000110318

DESCRIPTION Uncharacterized protein KIAA1377.

[Source:Uniprot/SWISSPROT;AccQ9P2H0]

AGTTTTCTTAACATTTTCCAAAGCAACTTGTCTATGTTTTCTCTATTTTTTTTTTTTTTTGCTTACTACTTCATCAGTTTA  
TTTTCTTTTTATTAGATTCT

In100 candidate2942 (in intron):

LOCUS ENSG00000154330

DESCRIPTION Phosphoglucomutase-like protein 5 (Phosphoglucomutase-related  
potein) (PGM-RP) (Aciculin). [Source:Uniprot/SWISSPROT;Acc:Q15124]

ACTATTTAGTAACCATTCTGGTTATTTTTACTACTGAATTGATCCTTTAATTATTCTATTTCCCCTTCTCCTCCCCAGTT  
TTCATCTCTTTATTTTGTT

In100 candidate2943 (in intron):

LOCUS ENSG00000137693

DESCRIPTION 65 kDa Yes-associated protein (YAP65).

[Source:Uniprot/SWISSPRO;Acc:P46937]

TGAAAATGAACTAATACAATCCTTAAGTGCTTTTAACAAGCAAATGCTTACTTCATTTATATTTGTCCTTATCAGTATCA  
GTTTTGCTAGCTTACCTTTT

In100 candidate2944 (in intron):

LOCUS ENSG00000148498

DESCRIPTION Partitioning-defective 3 homolog (PARD-3) (PAR-3) (Atypical  
PKCisotype-specific-interacting protein) (ASIP) (CTCL tumor antigen se2- 5)  
(PR3-alpha). [Source:Uniprot/SWISSPROT;Acc:Q8TEW0]

CATTGAGGTGGGTAGGTGTAACCATGAGAATGGGTTGTCATCCTCATCTCCACAATTTATTTGTTATCACTTCTCCAGAT  
CCCTGTTTCTTCTTTCAGTC

In100 candidate2945 (in intron):

LOCUS ENSG00000148498

DESCRIPTION Partitioning-defective 3 homolog (PARD-3) (PAR-3) (Atypical PKCisotype-specific-interacting protein) (ASIP) (CTCL tumor antigen se2- 5) (PR3-alpha). [Source:Uniprot/SWISSPROT;Acc:Q8TEW0]

AGCACATGGCAATGTGACAATTGCTCACTGCATAACCAAATGGATACTCTGAATATATTTTCCTCTTCTACAGATTTTTTTT

TCTCCTGGGGCAATTTTTTTT

In100 candidate2946 (in intron):

LOCUS ENSG00000148498

DESCRIPTION Partitioning-defective 3 homolog (PARD-3) (PAR-3) (Atypical PKCisotype-specific-interacting protein) (ASIP) (CTCL tumor antigen se2- 5) (PR3-alpha). [Source:Uniprot/SWISSPROT;Acc:Q8TEW0]

TAAGGCTTTATTTGGACTTTGATCATAAATGTATTTACTTTGCATAGTTAACATGACTATTACTCTGTATTTTTTTCAGAT

TCTTATTTTGAGTTCTTCAT

In100 candidate2947 (in intron):

LOCUS ENSG00000148498

DESCRIPTION Partitioning-defective 3 homolog (PARD-3) (PAR-3) (Atypical PKCisotype-specific-interacting protein) (ASIP) (CTCL tumor antigen se2- 5) (PR3-alpha). [Source:Uniprot/SWISSPROT;Acc:Q8TEW0]

CTTTTTTTTTTTTTTGCTTTGTTTTTATTTTATTTATTAATAAGGAAAAGCTACTTCTTTTATAGCAGTCTGTTTAATA

GCACTTATTTTACCTGTTT



In100 candidate2948 (in intron):

LOCUS ENSG00000107242

DESCRIPTION Phosphatidylinositol-4-phosphate 5-kinase type-1 beta (EC 2.7.168) (Phosphatidylinositol-4-phosphate 5-kinase type I beta) (PtdIns(4)P-5-inase beta) (PIP5KIbeta) (Type I phosphatidylinositol-4-phosphate 5- kinasebeta) (Protein STM-7). [Source:Uniprot/SWISSPROT;Acc:O14986]

CTGTCTCTTGCTTTTTGCACCTTTAAAAGTCTAGACCAATTTAATAACCCACGCCCCATGGTCTCTTTGCTACTCAGCT  
GATTTTTTGATCCCAACTCT

In100 candidate2949 (in intron):

LOCUS ENSG00000107242

DESCRIPTION Phosphatidylinositol-4-phosphate 5-kinase type-1 beta (EC 2.7.168) (Phosphatidylinositol-4-phosphate 5-kinase type I beta) (PtdIns(4)P-5-inase beta) (PIP5KIbeta) (Type I phosphatidylinositol-4-phosphate 5- kinasebeta) (Protein STM-7). [Source:Uniprot/SWISSPROT;Acc:O14986]

TTTTTTTAACCCACCTTTGAAATTTTAGCACTCTTTTTACTTTGGTCATCTCTGTCTCTGTGCAGCTACCAATTTTTTAA  
AAATGTTCTCTTCTATTCTC

In100 candidate2950 (in intron):

LOCUS ENSG00000171402

DESCRIPTION G antigen family D member 4 (Placenta-specific gene 6 protein) Protein XAGE-3). [Source:Uniprot/SWISSPROT;Acc:Q8WTP9]

TGTGGGAAACTTCTGAAAGTTCCCACTTATCCCTCAAAAACACTTAACTTTTAGAAACAATTATTTGGCTTTTCCAGAT  
GTCTTACTGTCCTTTTCTAT

In100 candidate2951 (in intron):

LOCUS ENSG00000108094

DESCRIPTION Cullin-2 (CUL-2). [Source:Uniprot/SWISSPROT;Acc:Q13617]

CTGTTTAGTTACCCAATGGTAGAGTTCATATAGGAAAAGCAAATAACTGTTTGTTTCCTTTTAAATAACCCAGTT  
TTTTGTTTTTGTTTTGTTTT

In100 candidate2952 (in intron):

LOCUS ENSG00000182646

DESCRIPTION Transmembrane protein 29.

[Source:Uniprot/SWISSPROT;Acc:Q8NDB6]EXON

TAAGTGGGAAACTCAATCATTTTGAAATAACATTCCTTTCCTGTTTTACTTGCGTTTTCTTCCTTATTATTACTCAGCC  
ACTGTTTCTCTAATAATTTT

In100 candidate2953 (in intron):

LOCUS ENSG00000136709

DESCRIPTION WD repeat protein 33 (WD repeat protein WDC146).

[Source:Unipro/SWISSPROT;Acc:Q9C0J8]

TGGGTCACATGGTATTTTGACATTTAACATTTGAGGAAATTCTTGACTATTTTCCCACCTAATTTTCAGTTTATTTTATG  
CCTAACAACCACTATTCTTT

In100 candidate2954 (in intron):

LOCUS ENSG00000100991

DESCRIPTION Trpc4-associated protein (Short transient receptor potential  
chnnel 4-associated protein) (Trp4-associated protein) (TAP1 protein)  
(TNFrceptor  
ubiquitous scaffolding/signaling protein) (Protein TRUSS).

[Source:Uiprot/SWISSPROT;Acc:Q8TEL6]

TTATCAATCGTATTGATCTTTTTAAAGAACTAACTTTTGGTTTTGTTTTCTCTCTTGATTTTTTGTTTTCAATTTTCAGTG  
ATGTTTGCTCTCATTTTTAT

In100 candidate2955 (in intron):

LOCUS ENSG00000100991

DESCRIPTION Trpc4-associated protein (Short transient receptor potential  
chnnel 4-associated protein) (Trp4-associated protein) (TAP1 protein)  
(TNFrceptor  
ubiquitous scaffolding/signaling protein) (Protein TRUSS).

[Source:Uiprot/SWISSPROT;Acc:Q8TEL6]

ATTTTGATAAGTTATATTTTCATTTAGTTTAAAATATTTTAACTGTAAGAGTTGATTTGCCATTTTTTTGTCTGGCAGTT  
CTTTTAGGCAGTTTTTGCCT

In100 candidate2956 (in intron):

LOCUS ENSG00000136715

DESCRIPTION mSin3A-associated protein 130

[Source:RefSeq\_peptide;Acc:NP\_07821]

GATTTTCCCCTGAAAGTAACACTTCGTATAATTCCTTTTTTTATGTGCGATTTTTTTCAAGCCAGTCTCCTTTTGATGGA  
TGTTTTTCCTAGTATCCATTT

In100 candidate2957 (in intron):

LOCUS ENSG00000187240

DESCRIPTION dynein, cytoplasmic, heavy polypeptide 2

[Source:RefSeq\_peptideAcc:NP\_001073932]

TGTAAGTGAATTTATTTCTTATACTCTGCCATTTAGGTTGGTATTTCTTTTATTTTCTTAGAATTCTCTCCTTCAGGC  
TTTGAGAGTTTTCCTTGCTT

In100 candidate2958 (in intron):

LOCUS ENSG00000187240

DESCRIPTION dynein, cytoplasmic, heavy polypeptide 2

[Source:RefSeq\_peptideAcc:NP\_001073932]

CCTGCTGTAACTTTGATTTCTTTTCCTCCTCTTATCTAATATTTTCACTATGATCAGTATGTTCCATGAAATATATAT  
ATTCCTTATTTTCTCTCCT

In100 candidate2959 (in intron):

LOCUS ENSG00000187240

DESCRIPTION dynein, cytoplasmic, heavy polypeptide 2

[Source:RefSeq\_peptideAcc:NP\_001073932]

CGGTGGTGATACCCCCTTTAACATTTTTATTGCATCTATTTGATTCTGCTCTCTTTTCTTATTAGTGTTGCTAGCAGTC  
TATCAATTTTGTTGATCTTT

In100 candidate2960 (in intron):

LOCUS ENSG00000145012

DESCRIPTION Lipoma-preferred partner (LIM domain-containing preferred  
translocation partner in lipoma). [Source:Uniprot/SWISSPROT;Acc:Q93052]

CTGGTAAACTCTTATTTAACTTCAAGATCTGTCTCTAATATTAAGTTCTTGGAGAAGTTTGACCATTCTTCCAGTTCCC  
ACATATTATTAGCTTATCTT

In100 candidate2961 (in intron):

LOCUS ENSG00000145012

DESCRIPTION Lipoma-preferred partner (LIM domain-containing preferred  
translocation partner in lipoma). [Source:Uniprot/SWISSPROT;Acc:Q93052]

CATTTTTATGATTTTTGGTGGATTTAGCATCATTTTCTATGCTTAGTAACTGCTTGCCTATTCATATCCTTTATCCAGGT  
TTTTTGTTTTGTTTTGTTTC

In100 candidate2962 (in intron):

LOCUS ENSG00000095794

DESCRIPTION cAMP-responsive element modulator.

[Source:Uniprot/SWISSPROT;Ac:Q03060]

CAAAAAGAATTAAAATCATCCATGGCTCTAACCACCTTAGGATACCTCCTATTATAGTCTATGTACTTCCAGTCAGCTCTC  
ATTTTCTCTCACTTTTTCTT

In100 candidate2963 (in intron):

LOCUS ENSG00000136731

DESCRIPTION UDP-glucose:glycoprotein glucosyltransferase 1 precursor (EC  
2..1.-) (UDP-glucose ceramide glucosyltransferase-like 1) (UDP-- Glc:glycoprotein  
glucosyltransferase) (HUGT1). [Source:Uniprot/SWISSPROT;Acc:Q9NYU2]

AAAAAAAAACACTTTCTGGTAAGAGTTTTTAACCTGTGTGTATCTTTTTTCCTTTAGTTGTCAAATATTTAATTTTCAGGG  
GTTTTTTTTGTTCTTTTTAT

In100 candidate2964 (in intron):

LOCUS ENSG00000188001

DESCRIPTION Protein FAM79B. [Source:Uniprot/SWISSPROT;Acc:Q6ZUI0]

TTAAGGGATGGAGTGGTAGAGGCCTGGCATTTCCTTCCCATCTCTACGTAACAATCCCAAATTTCTGTGTTTACCAGGGT  
TTCTGTTACTCCCCTGATGT

In100 candidate2965 (in intron):

LOCUS ENSG00000188001

DESCRIPTION Protein FAM79B. [Source:Uniprot/SWISSPROT;Acc:Q6ZUI0]

TAACCCTTTTTATAATTATTCACCTCTCACTTGATCTAAATTCTGCTCTTGATTTAACCTCAAGTCTTTTCTTCTGCAGGT  
TAAGATCACTTTTTTTCACC

In100 candidate2966 (in intron):

LOCUS ENSG00000073282

DESCRIPTION Tumor protein p73-like (p73L) (p63) (Tumor protein 63) (TP63)

(51) (p40) (Keratinocyte transcription factor KET) (Chronic ulcerative stomatitis  
protein) (CUSP). [Source:Uniprot/SWISSPROT;Acc:Q9H3D4]

AGCATGAAAAGAAAAGGCCATGAAAATCCCCTAACATAGACCGTTAATTTTTCTTTCCTTTTTATTTTAAAGAAACAGAC  
ACTTTCCTTAACTGGACTTT

In100 candidate2967 (in intron):

LOCUS ENSG00000204711

DESCRIPTION Uncharacterized protein C9orf135.

[Source:Uniprot/SWISSPROT;AccQ5VTT2]

TTTTTAGAAAGATAACTGAATGTTTAACTCTTCACCTGTATTTACTTTGCATACTCAGTGTAGTTAATCTATATCTCTT  
TATATTCTAATTTTATTTTT

In100 candidate2968 (in intron):

LOCUS ENSG00000204711

DESCRIPTION Uncharacterized protein C9orf135.

[Source:Uniprot/SWISSPROT;AccQ5VTT2]

AAATAATGTGGGATGTATTTTTAGGGCACATAAATCATTAACCATTGCATTATATATTTATGCTTTTAATTTTTTCAGCA  
TTATTTCTAATATTCTCAT

In100 candidate2969 (in intron):

LOCUS ENSG00000198398

DESCRIPTION SRSR846 (UNQ846), mRNA [Source:RefSeq\_dna;Acc:NM\_207316]

TCAAATAACAACAACACTGGTCTATTTTATTATTCCTATTTAAATTTGTTTTCAACACCAGGGTACGTTTTTCTGATCC  
AATCCAATTATTTTACTTTT

In100 candidate2970 (in intron):

LOCUS ENSG00000165072

DESCRIPTION MAM domain-containing protein 2 precursor.

[Source:Uniprot/SWISPROT;Acc:Q7Z304]

ATATATTTAACCATGTCTCCAACCTTTTTTTTCAAAAGTGCTCATCCTTCAGCTTATCTTGACTCTGGACAGTCTTCATC  
CTAACCTTACTGTTCTCTTT

In100 candidate2971 (in intron):

LOCUS ENSG00000196083

DESCRIPTION Interleukin-1 receptor accessory protein precursor (IL-1 receptr accessory protein) (IL-1RAcP). [Source:Uniprot/SWISSPROT;Acc:Q9NPH3]

AACTGCATTGCTTTTCATATGCTTATTTTAATTTGTATGTTTTTGTAACCATTTTTATAGCTTCAATTGCCTTTCAGCA  
TAATTTTTCACATTTTTCAC

In100 candidate2972 (in intron):

LOCUS ENSG00000152578

DESCRIPTION Glutamate receptor 4 precursor (GluR-4) (GluR4) (GluR-D)  
(Glutaate receptor ionotropic, AMPA 4) (AMPA-selective glutamate receptor 4).  
[Sorce:Uniprot/SWISSPROT;Acc:P48058]

CGAGTATCTGCTTTCTACACCCCTCATTTATCTAACTTCTTATGGCTTCCTTAGCCTTGTTTATTATTACTTCTTCAGGA  
TTTCACTTTCTTCTTAGCTT

In100 candidate2973 (in intron):

LOCUS ENSG00000198887

DESCRIPTION Structural maintenance of chromosomes protein 5 (hSMC5).  
[Source:Uniprot/SWISSPROT;Acc:Q8IY18]

AGAACTCTTCCTTGACACACATAAGTAACTTTACTTAATACTACCTCTGACTTTATTTTGCATTTTCCTCAGCAATATTTT  
ACACCACTCTGTTTTTCTTA

In100 candidate2974 (in intron):



LOCUS ENSG00000188729

DESCRIPTION Osteocrin precursor (Musclin).

[Source:Uniprot/SWISSPROT;Acc:P6366]

CTGGAATTGAATTTAAATTTTAACATGGTTTTGTACACTTTGATTATTTTCCTTCTCATCCTTCACAGGTTCTTGCCAA  
GTCCTTCAGCTTGGTCTGTT

In100 candidate2975 (in intron):

LOCUS ENSG00000182359

DESCRIPTION Kelch repeat and BTB domain-containing protein 3 (BTB and  
kelchdomain-containing protein 3). [Source:Uniprot/SWISSPROT;Acc:Q8NAB2]

ATGAGCAAAATTCATTGGCTGAGGCATTCCTAAACTTCTTAACATTCAAAGTGTCTTTTCATTGATTTTCAACTCAGAG  
TCTCTGTGTCCATGTTTTAT

In100 candidate2976 (in intron):

LOCUS ENSG00000114279

DESCRIPTION Fibroblast growth factor 12 (FGF-12) (Fibroblast growth factor  
omologous factor 1) (FHF-1) (Myocyte-activating factor).

[Source:Uniprot/SWSSPROT;Acc:P61328]

GAAACTTGGTCTTTTTGTCTTTATTTTTTAACAAGTTTGTATTTTGTGAAGTTTCTTCTTCTCCTTGGATCAGAGTAT  
ATTGTATATATTTTCCCTTT

In100 candidate2977 (in intron):

LOCUS ENSG00000152402

DESCRIPTION Guanylate cyclase soluble subunit alpha-2 (EC 4.6.1.2) (GCS-alpha-  
2). [Source:Uniprot/SWISSPROT;Acc:P33402]

CAATATTGATAGGTTATTATTAACAAAATTCATGCTTTATTTCAATATCCTTAGTTTTTAACCTTTTCCTGTTCCAGGA

TTTCATTTACATTACATTT

In100 candidate2978 (in intron):

LOCUS ENSG00000152402

DESCRIPTION Guanylate cyclase soluble subunit alpha-2 (EC 4.6.1.2) (GCS-alpha-2). [Source:Uniprot/SWISSPROT;Acc:P33402]

TGTTATGAATAATGTACGCAAACTGTTGATACTGGCTAACTTAGGGGAAAGAGCTTTTCCATTTTAAATCTTACAGTT  
TTATATCTGTTACATTTTC

In100 candidate2979 (in intron):

LOCUS ENSG00000180611

DESCRIPTION Uncharacterized protein C3orf59.  
[Source:Uniprot/SWISSPROT;Acc:8IYB1]

TCACATCCGGTATCTGAAGATAGCTTGAAGTCTGTCTTTAGTCTAACCCTTGCTATTATGATTTCATTTCCCTCACAGAA  
CCAATTTTGTCTCTTAGT

In100 candidate2980 (in intron):

LOCUS ENSG00000152404

DESCRIPTION CWF19-like 2, cell cycle control  
[Source:RefSeq\_peptide;Acc:NP\_89647]

CTAAAGTAAGATAATTTGTTTTAACATCCACTTTGGCATTATCTTCCATAGCCTCCTTATTTGTTCTTTGTTCTGCAGCT  
GAGGTAGCTTTTTTCTCTC

In100 candidate2981 (in intron):

LOCUS ENSG00000083067

DESCRIPTION Transient receptor potential cation channel subfamily M member  
(Long transient receptor potential channel 3) (LTrpC3) (Melastatin-2) (MLS2).

[Source:Uniprot/SWISSPROT;Acc:Q9HCF6]

AACATTGGTATGTACTATTAAGTGAATTACAAATTTATTTGATTTTTTTTTTTTACCAGTTTTTCTTTTTTTTTTTTAA  
CTAGTTTCTTTTTCTTTTCC

In100 candidate2982 (in intron):

LOCUS ENSG00000083067

DESCRIPTION Transient receptor potential cation channel subfamily M member  
(Long transient receptor potential channel 3) (LTrpC3) (Melastatin-2) (MLS2).

[Source:Uniprot/SWISSPROT;Acc:Q9HCF6]

AGATTAACTCTGTAAATTCTCTCACATCTTCTTTCTGTTTTCTATTCTTTTTTCTCATCTATTTTCAGCTTTTGATTGTT  
ATTTTTTTCTGATAGCTTGT

In100 candidate2983 (in intron):

LOCUS ENSG00000083067

DESCRIPTION Transient receptor potential cation channel subfamily M member  
(Long transient receptor potential channel 3) (LTrpC3) (Melastatin-2) (MLS2).

[Source:Uniprot/SWISSPROT;Acc:Q9HCF6]

TATTTTTTAAAAATAACAATCTCTTGTATTTTTTAAATTCTACAACATTTCTGCCCTCTAATTTTTTTTAACTTTTTCAGTT  
ATTCTTTATTTTATATTGCT

In100 candidate2984 (in intron):

LOCUS ENSG00000083067

DESCRIPTION Transient receptor potential cation channel subfamily M member  
(Long transient receptor potential channel 3) (LTrpC3) (Melastatin-2) (MLS2).

[Source:Uniprot/SWISSPROT;Acc:Q9HCF6]

TTTATACAACAACCCAAGAGGAGCTGGAGAGATAACTAAGGATACAATTTTCATTCATTTGAAACCTTTATCTTCCAGTA  
CTTCCATTTAAGTTTTTGTT

In100 candidate2985 (in intron):

LOCUS ENSG00000083067

DESCRIPTION Transient receptor potential cation channel subfamily M member  
(Long transient receptor potential channel 3) (LTrpC3) (Melastatin-2) (MLS2).

[Source:Uniprot/SWISSPROT;Acc:Q9HCF6]

AGAACTATATAACCCGAACGTTGGTCTCTTTGTACACACCTTTTCTATACTGCAGATCTTCATTCACCTTTCATATGTGTA  
TCATTTTTATTGTCGTGTTA

In100 candidate2986 (in intron):

LOCUS ENSG00000187527

DESCRIPTION ATPase type 13A5 [Source:RefSeq\_peptide;Acc:NP\_940907]

TCTATTTATGGTTAGTTTTATTGTTAAGGGGTCATTTTCATAGAGAGATAACATAATCTAATTTCTGTTTTGCTGCAGTA  
TCATCTCTGTTTTTCATGTTC

In100 candidate2987 (in intron):

LOCUS ENSG00000136002

DESCRIPTION Rho guanine nucleotide exchange factor 4 (APC-stimulated guanine nucleotide exchange factor) (Asef). [Source:Uniprot/SWISSPROT;Acc:Q9NR80]

EXON

GAGCCAAGAGATTTAGGAAGGGAAGGGTTTTCTTTTTTTAACTACCATTTTAATTTCTTAAGTCTTTGTTCACTCAGAT  
TTTCTCTTATGCCAATTTTA

In100 candidate2988 (in intron):

LOCUS ENSG00000127249

DESCRIPTION ATPase type 13A4 [Source:RefSeq\_peptide;Acc:NP\_115655]

CTGTTTTTCTCCATATAGGTAGGTATCATTACTCTTTGGGTGCTTTTAACATTTTTTTTTTTGTCTTTATTTTTTACAGAT  
TTGACTATTATGCTTCTTTT

In100 candidate2989 (in intron):

LOCUS ENSG00000127249

DESCRIPTION ATPase type 13A4 [Source:RefSeq\_peptide;Acc:NP\_115655]

CTTACCGAGGACTTATGTAGCCTCATTATCTGCCCAAGTAATTTCTTCTTAACCTGTATCAATACTTTGGTTTCAGTT  
TACCTTTCTAGCTTCATTCT

In100 candidate2990 (in intron):

LOCUS ENSG00000115762

DESCRIPTION Pleckstrin homology domain-containing family B member 2 (Evecti-2). [Source:Uniprot/SWISSPROT;Acc:Q96CS7]

AACCCTGAGCGTGGCTGGGGCTGTGGTAACTAAAGACCCATTTTCTAAATTTTGCCGGCTTTATGTTCTTCAGATTGCTC  
TGAGCTACTTTTCTTTCTCA

In100 candidate2991 (in intron):

LOCUS ENSG00000166266

DESCRIPTION Cullin-5 (CUL-5) (Vasopressin-activated calcium-mobilizing  
receptor) (VACM-1). [Source:Uniprot/SWISSPROT;Acc:Q93034]

AGCTTTCTTCTATAACTCCATTTATGTTCTATTTTATTTTCATTTCCAGCATTATCACTTTTCATTTCTGTTTACTTTT  
ATATCTTTGCCAATTATCTT

In100 candidate2992 (in intron):

LOCUS ENSG00000112812

DESCRIPTION Thymus-specific serine protease precursor (EC 3.4.-.-) (Serine  
protease 16). [Source:Uniprot/SWISSPROT;Acc:Q9NQE7]

TCCTATTAACGACCGCCACCATTTTCCAACCTTACTTCACCTGCTTTTTGTTTCTTTCATCTGCTTTATTCTTACAGAA  
CTTAGCTTTTTCTTTCCTCA

In100 candidate2993 (in intron):

LOCUS ENSG00000149311

DESCRIPTION Serine-protein kinase ATM (EC 2.7.11.1) (Ataxia telangiectasia  
mutated) (A-T, mutated). [Source:Uniprot/SWISSPROT;Acc:Q13315]

TAGCAAAGCCTATGATGAGAACTCTTTAACAACAAATTTAAACATTTATTTCCCTGAAAACCTCTTCTTTATTTTCAGAG  
TGTCTTTTCTTTTTTTGCTAC

In100 candidate2994 (in intron):

LOCUS ENSG00000149311

DESCRIPTION Serine-protein kinase ATM (EC 2.7.11.1) (Ataxia telangiectasia mutated) (A-T, mutated). [Source:Uniprot/SWISSPROT;Acc:Q13315]

AGAGCACTTTAACCTGGGTGTATTTCCCTTTTCTTTTCAGTGTATTTGTCTCTCCTGGCCTTCAAGATTTTATTTTCTTC  
CTAATGGACCATTCTCTCCT

In100 candidate2995 (in exon):

LOCUS ENSG00000149311

DESCRIPTION Serine-protein kinase ATM (EC 2.7.11.1) (Ataxia telangiectasia mutated) (A-T, mutated). [Source:Uniprot/SWISSPROT;Acc:Q13315]

CTTCTGTACTGTCCATGTATGTTATCTTTCTGTGATAACTTCATAGATTGCCTTCTAGTTCATGAATTCTCTTGTCAGAT  
GTATATAATCTCTTTTACCC

In100 candidate2996 (in intron):

LOCUS ENSG00000198105

DESCRIPTION Zinc finger protein 248. [Source:Uniprot/SWISSPROT;Acc:Q8NDW4]

EXON

TTATTTTTCTATGAACTTAACTGTTAGTATCTTTTGCCTATTTTTCTTTTGGGTTGTCTGGTCTTTTTTCCCCCCCAGTG  
TCTTTTACCCTTGTGTATTA

In100 candidate2997 (in intron):

LOCUS ENSG00000129657

DESCRIPTION SEC14-like protein 1. [Source:Uniprot/SWISSPROT;Acc:Q92503]

ATACCGTATGTAAGCTGAGGCTTTTTTTTTTTTTTTAGCTTAGCATAATTCTCCCACGATTCATCCAGTTCCTCACCTG  
GATCAATAGTTCATTCTTTT

In100 candidate2998 (in intron):

LOCUS ENSG00000096654

DESCRIPTION Zinc finger protein 184. [Source:Uniprot/SWISSPROT;Acc:Q99676]

EXON

GTGTCCATTGTTTCTAACAAAAAGTTACTGTTGTTTTATCTTTGTTTTTTATATTTGTGTGTCTTTTTTCCTCAGAT  
TACTTGTAAGATTTTTTTCT

In100 candidate2999 (in intron):

LOCUS ENSG00000096654

DESCRIPTION Zinc finger protein 184. [Source:Uniprot/SWISSPROT;Acc:Q99676]

EXON

CCTTTTAACTCTTATAAATATGAATCTGTTTCTGGATTTTCTATTTTATTTTCATTTTGTTTTATTCCAGACTAGGCCATT  
TTTAAATTACTTTATCTTTT

In100 candidate3000 (in intron):

LOCUS ENSG00000183840

DESCRIPTION Probable G-protein coupled receptor 39.

[Source:Uniprot/SWISSPRT;Acc:O43194]

TGAAGATTTCCCACTCTGTGGGTGTCTGTAACTCTGCTGCTTATTTCTTTTGCTGAGCAGAACTTTTTAGTTTAATTA  
AATTCCATCTATTTATCTTT

In100 candidate3001 (in intron):



LOCUS ENSG00000166323

DESCRIPTION Uncharacterized protein C11orf65.

[Source:Uniprot/SWISSPROT;AccQ8NCR3]

GAACAATGTAAGAAGCTCATAACATGTTAACTCACTTTAGCCTCTTCACCTTTGTCCTGTTATTTCCAGATATTTCACTT  
ACACTTTTGTTTTAAGTACC

In100 candidate3002 (in intron):

LOCUS ENSG00000166323

DESCRIPTION Uncharacterized protein C11orf65.

[Source:Uniprot/SWISSPROT;AccQ8NCR3]

TCTGTGTCTTTATATTTAAAGTGGGTGCTTGTGGATAACATATAGTTGGGTCTTGATTTTTTATCCGCTCTGACAGTCT  
CTGATCTGCCCTTTGTAATT

In100 candidate3003 (in intron):

LOCUS ENSG00000197755

DESCRIPTION NAP5\_HUMAN Isoform 3 of O14513 - Homo sapiens (Human)

[Source:Uiprot/Varsplic;Acc:O14513-3]

TACAAACTGTTAGTTTAAACATGGGATTATATCATTTTTGGCCTTTTCTTGTGGCAGGAATATTCCATTTGTCCATTAAGCT  
CACGTCCGTTTTCTTCACTT

In100 candidate3004 (in intron):

LOCUS ENSG00000107362

DESCRIPTION

ATGTGTTTTTTTTCTTTAGTTCATTAATGTGAATTACTTTGGTTTAAACATTGGAAGATTTGTCATTCTTGTCTTTCAGCT  
TGATTTTGTATTTTGTATTT

In100 candidate3005 (in intron):

LOCUS ENSG00000114331

DESCRIPTION Centaurin-beta 2 (Cnt-b2). [Source:Uniprot/SWISSPROT;Acc:Q15057

TCTTCTCTTTTCTTCCCTTTCTCTTAACATCTATCTCCCTTATTACTTATTCTCTGTTTTGCTCATTTTGCTGCTCAGTC  
ATATATTTTATTTTCATTATT

In100 candidate3006 (in intron):

LOCUS ENSG00000114331

DESCRIPTION Centaurin-beta 2 (Cnt-b2). [Source:Uniprot/SWISSPROT;Acc:Q15057

ACTAATAATGGGTAAATCTACTTGGTATTCTATAACCTTCTTTTACTTGAAGTTTTGTATCTTTCTCTCAGTTTCAGAA  
ATTTTCTGTTACTATCCTTT

In100 candidate3007 (in intron):

LOCUS ENSG00000114331

DESCRIPTION Centaurin-beta 2 (Cnt-b2). [Source:Uniprot/SWISSPROT;Acc:Q15057

TTATAAATGTTCTGTGGTAACGGTTGAAGTTCTTTTTCCTCTCTATTATTATTAAATTCTTTGCATGTGGCTCTCCAGCT  
TGCTCTGTACATTTTCCCAT

In100 candidate3008 (in intron):

LOCUS ENSG00000114331

DESCRIPTION Centaurin-beta 2 (Cnt-b2). [Source:Uniprot/SWISSPROT;Acc:Q15057

ATGTGTGTCTGTGTGTGTATGTGTGACTTCTTTTGCTTGGAATAACATTTTGGAGATCGGTATTGTTCCCTGTTTCAGTA  
GTTCTCTCTTTTAAATACTT

In100 candidate3009 (in intron):

LOCUS ENSG00000114331

DESCRIPTION Centaurin-beta 2 (Cnt-b2). [Source:Uniprot/SWISSPROT;Acc:Q15057  
CTGACATTTCAAAGCCCTAAGTATCTGATTAACCTGATTCCTTCCTATTTTTTCCTCCTAAATTTTTTCCCAGTA  
ACGTTTTTTCCTGCCCTTTT

In100 candidate3010 (in intron):

LOCUS ENSG00000178105

DESCRIPTION Probable ATP-dependent RNA helicase DDX10 (EC 3.6.1.-) (DEAD bo  
protein 10). [Source:Uniprot/SWISSPROT;Acc:Q13206]  
GTTGTCCTCTTGAAACTTTTTTCCCTCTGACCCTAATTTCTTAACCTTCTGACCCTTATAATCTGTTTTTCTCCCAGTA  
CTTGTTTTCTGGCTTTTCCC

In100 candidate3011 (in intron):

LOCUS ENSG00000178105

DESCRIPTION Probable ATP-dependent RNA helicase DDX10 (EC 3.6.1.-) (DEAD bo  
protein 10). [Source:Uniprot/SWISSPROT;Acc:Q13206]  
TGCTTGCTGTTTTTACTATCGACTCTGTGATCGATCTCTTAACCTTTTCCTTTTTTGTTTTGGTTTTATCAGTACCTTTA  
ATGTAATTGCATTCCTTTCT

In100 candidate3012 (in intron):

LOCUS ENSG00000178105

DESCRIPTION Probable ATP-dependent RNA helicase DDX10 (EC 3.6.1.-) (DEAD bo  
protein 10). [Source:Uniprot/SWISSPROT;Acc:Q13206]

ATTATCTTTTGCTTCCAACCTGATGACATGCAAATAACTTGATTTTGTTTTGTTTGTCTTTTGTTTTTCAGATTGTCAT  
TTGTTTTGGGTCATATTTTT

In100 candidate3013 (in intron):

LOCUS ENSG00000178105

DESCRIPTION Probable ATP-dependent RNA helicase DDX10 (EC 3.6.1.-) (DEAD bo  
protein 10). [Source:Uniprot/SWISSPROT;Acc:Q13206]

TCTCCACCTATAACTCTTTATGTAGATCATTGCATGAGTTCCTCCTTCTTTCTTTTAGATCTTTGCACCTTCTTCAGAA  
AGGCCTTTCCTATTTTTCTA

In100 candidate3014 (in intron):

LOCUS ENSG00000178105

DESCRIPTION Probable ATP-dependent RNA helicase DDX10 (EC 3.6.1.-) (DEAD bo  
protein 10). [Source:Uniprot/SWISSPROT;Acc:Q13206]

TTTCTCCCACTCTGTGGGTTGTCTGTAACTCTGCTGATTTCTTTTGCTGTGCAGAAGCTTTTAGCTTTAATTAAGTCC  
CATCTATTTATCTTTGTTTT

In100 candidate3015 (in intron):

LOCUS ENSG00000082258

DESCRIPTION Cyclin-T2 (CycT2). [Source:Uniprot/SWISSPROT;Acc:O60583]

TTTTGGTTTGATAGGCTCACACTTGGCAAATGCCAATTAACAAATGGGCATTTTGACTTATTCCACTTCCTTTGTCAGTT  
TGTTACCTCTCTTGTCTTTC

In100 candidate3016 (in intron):

LOCUS ENSG00000137714

DESCRIPTION Adrenodoxin, mitochondrial precursor (Adrenal ferredoxin)  
(Ferrdoxin- 1) (Hepatoredoxin). [Source:Uniprot/SWISSPROT;Acc:P10109]

GGAGTAACTTTTTTTTTTTTTCTTAAATAGCCTCTTGTCTTCTTACAGTTTTAGGCTCTTTTTTATACCCAAATATTTA  
CCTTATTTTTGCAGGTTTTT

In100 candidate3017 (in intron):

LOCUS ENSG00000115839

DESCRIPTION Rab3 GTPase-activating protein catalytic subunit (RAB3  
GTPasectivating

protein 130 kDa subunit) (Rab3-GAP p130) (Rab3-GAP).

[Source:Unipot/SWISSPROT;Acc:Q15042]

AACCCATGTTTACACACTTAAATGACTATCCATAAGACACTAACATCATTCTATTCTCTTATCTCCGTGAGTTCAGTTTG  
TTTGTTTTTTTAGCTCCCAC

In100 candidate3018 (in intron):

LOCUS ENSG00000115839

DESCRIPTION Rab3 GTPase-activating protein catalytic subunit (RAB3  
GTPasectivating

protein 130 kDa subunit) (Rab3-GAP p130) (Rab3-GAP).

[Source:Unipot/SWISSPROT;Acc:Q15042]

AATAATAATTTGAAACATGGATTCTGTAACTTTATTATCCATGCCTATATTCTTTATTTACCAGGCATAATTTACTAGC

TTTGGTTTTTGTTTTGTTTT

In100 candidate3019 (in intron):

LOCUS ENSG00000121988

DESCRIPTION Zinc finger Ran-binding domain-containing protein 3 (EC 3.6.1.-.  
[Source:Uniprot/SWISSPROT;Acc:Q5FWF4]

TATGTTTTTTATTATTAATTAAACCCAACTAACTTCTACTTGGGTAAATCTCTTCTCAATACTTTCAGACACATTAAGT  
ATTCTATCATTTTTTATCTTT

In100 candidate3020 (in intron):

LOCUS ENSG00000170145

DESCRIPTION Serine/threonine-protein kinase SNF1-like kinase 2 (EC 2.7.11.1  
(Qin- induced kinase) (SIK2). [Source:Uniprot/SWISSPROT;Acc:Q9H0K1]

TTGCCTTAACCCTAATTTAGTCCCTCATTAATTCATTTTCAGCTCATGATTAGGATCCCAAGTGGTTTCTTGCCTCTTTA  
TTTCCCTTATCAGTCTTTCC

In100 candidate3021 (in intron):

LOCUS ENSG00000204201

DESCRIPTION

ATAATTTAGTAACTTTAGAAATCACTTTCTCATTCCTTCTCTAGACTTTGCTGTTCTTAATTACTGAAGTCTTCAGTATCC  
ATTTGTTTTTTATGAATTTTT

In100 candidate3022 (in intron):

LOCUS ENSG00000196693

DESCRIPTION Zinc finger protein 11B. [Source:Uniprot/SWISSPROT;Acc:Q06732]

EXON

AAAGCAAACATAATGACCCTGGCTTTTATATTTGTCTATATAGTTAACTTTATTGGAAGTCTTTATTTTTTCCTCCAGAT  
TTGAGTCTAGTTTCTTTT

In100 candidate3023 (in intron):

LOCUS ENSG00000165091

DESCRIPTION Transmembrane channel-like protein 1 (Transmembrane cochlearexpressed protein 1). [Source:Uniprot/SWISSPROT;Acc:Q8TDI8]

TCTTAGGTTTGGTCATTTAACATAATCCCAAACCTTCTTGGAGGCTTTATTCATTTTTTAAATCCTTTACTTTCCAGTA  
CATTTTGCATTTCTCTGTGT

In100 candidate3024 (in intron):

LOCUS ENSG00000086848

DESCRIPTION Alpha-1,2-mannosyltransferase ALG9 (EC 2.4.1.-) (Asparagine-lined glycosylation protein 9 homolog) (Disrupted in bipolar disorder protein ).

[Source:Uniprot/SWISSPROT;Acc:Q9H6U8]

TAGAAATGTAAGTAGGTTAATTTCTCAAATGTTTAAGTTCCTAAAATCTAACCTGCTTTTTTTATGGTTTTTCTCAGAT  
CATTTGTTCTTTCTTCCATT

In100 candidate3025 (in intron):

LOCUS ENSG00000165092

DESCRIPTION Retinal dehydrogenase 1 (EC 1.2.1.36) (RaldH1) (RALDH 1) (Aldehyde dehydrogenase family 1 member A1) (Aldehyde dehydrogenase, cytosolic) (AHDII)

(ALDH-E1). [Source:Uniprot/SWISSPROT;Acc:P00352]

GCCCTTGAAATAATGCCTGGACATGGGAAATGATTTAACGTTAGTGATCCTAGTCCTATTTTTCTGAATCCTTTCCAGTT

TTTCCAGAATATTCCCTTTT

In100 candidate3026 (in intron):

LOCUS ENSG00000072274

DESCRIPTION Transferrin receptor protein 1 (TfR1) (TR) (TfR) (Trfr) (CD71 antigen) (T9) (p90). [Source:Uniprot/SWISSPROT;Acc:P02786]

GTAGCATAACTGGTCTTGTCTGCCTTAGTCTTAATTTTGTCTTTTGTATGTGTCACCTTCTTTTTTTTTTGAGACAGAG  
TTTTGCTCTTGTTTTCCAGG

In100 candidate3027 (in intron):

LOCUS ENSG00000196632

DESCRIPTION Serine/threonine-protein kinase WNK3 (EC 2.7.11.1) (Protein kinase with no lysine 3) (Protein kinase, lysine-deficient 3).

[Source:Uniprot/WISSPROT;Acc:Q9BYP7]

AGAGAAATAACTTACATTCCCTATGTTCTTGGTTTATGTTCTTTCTTTCCATCTTTTCCCAGTCTGTCTTTTTTCTAAC  
TTGCTGTCTTTTACTCTTTT

In100 candidate3028 (in intron):

LOCUS ENSG00000196632

DESCRIPTION Serine/threonine-protein kinase WNK3 (EC 2.7.11.1) (Protein kinase with no lysine 3) (Protein kinase, lysine-deficient 3).

[Source:Uniprot/WISSPROT;Acc:Q9BYP7]



TTGTTTAACGTAATATTTTCTGAACTGTCTCTTCTTTCATTCTTTTCAGGAATGTTTAACCTAATTAGTGGTCTTCCGAG  
CTATTTTTTTTTTTTTTTTTTTT

In100 candidate3029 (in intron):

LOCUS ENSG00000196632

DESCRIPTION Serine/threonine-protein kinase WNK3 (EC 2.7.11.1) (Protein kinse  
with no lysine 3) (Protein kinase, lysine-deficient 3).

[Source:Uniprot/WISSPROT;Acc:Q9BYP7]

AAGAGTCCTAACATTTTATTTCCCTTAGTGGAGAAATGTTCTTTTTTCATTTCTCTTCTTTTTCTCCCTCCCACCCAGAA  
ATGTTCTTTTTTTTGTTGTT

In100 candidate3030 (in intron):

LOCUS ENSG00000144229

DESCRIPTION Thrombospondin type-1 domain-containing protein 7B precursor.

[ource:Uniprot/SWISSPROT;Acc:Q9C0I4]

CTCTTTTTTTTCCTAACCTGGCTAGAGGTTCATTAATTTTATCAGTGCTTTTAAAAACCAGCTTTTGTTTTGTTGATTT  
TTTTCTATTGATTTTTTTTC

In100 candidate3031 (in intron):

LOCUS ENSG00000144229

DESCRIPTION Thrombospondin type-1 domain-containing protein 7B precursor.

[ource:Uniprot/SWISSPROT;Acc:Q9C0I4]

TTCTCATATATCAATGATGCTATTATTGACTTTTTATAATACCTTAACTTGTGAAATGCAATAGTCTTCTCTCTTCAGTT  
TTAATTTTTGTTTTTGTTTC

In100 candidate3032 (in intron):

LOCUS ENSG00000144229

DESCRIPTION Thrombospondin type-1 domain-containing protein 7B precursor.

[source:Uniprot/SWISSPROT;Acc:Q9C0I4]

AGTATTGTGTGTTTATTTTCATAAAAGTAAGATGGAGTGTTAACTCCTGGTCTTTGCTTGTTATTTTCGTTCCCAGGTTGA  
CTTTCCACATGTGCTTACTT

In100 candidate3033 (in intron):

LOCUS ENSG00000144229

DESCRIPTION Thrombospondin type-1 domain-containing protein 7B precursor.

[source:Uniprot/SWISSPROT;Acc:Q9C0I4]

TCCACTGCTTTAATATTGTTAGTTTGATGATGTTTTAACACCTAGTATGCTATTTTTTTCATTGTACAGTTATTTTCAAA  
ATTTTAGATATCTTCTCTTC

In100 candidate3034 (in intron):

LOCUS ENSG00000144228

DESCRIPTION Speckle-type POZ protein-like (HIB homolog 2) (Roadkill  
homolog2). [Source:Uniprot/SWISSPROT;Acc:Q6IQ16]

AAATAAGATTACCATCTGCTTATCCTAACTTTCGCTTGTCTCTTTCCTGACTGAACTCTGTCATTCAGTGATTCTTTCC  
AGGCTTCTGATGCTTTGTCT

In100 candidate3035 (in intron):

LOCUS ENSG00000163961

DESCRIPTION RING finger protein 168. [Source:Uniprot/SWISSPROT;Acc:Q8IYW5]

EXON

AGGTAAC TAATGATAGTGTCTTTTTCATGTGCTTATTGACAGTTTTGCCCTCTTCCATTGTAAAGTGTCTGTTTAATTC  
TTTTTCCCCTAAATTGTTTA

In100 candidate3036 (in intron):

LOCUS ENSG00000168702

DESCRIPTION Low-density lipoprotein receptor-related protein 1B precursor  
(ow- density lipoprotein receptor-related protein-deleted in tumor) (LRP- DI).  
[Source:Uniprot/SWISSPROT;Acc:Q9NZR2]

CATCTATTTTGAGGAGTCCTGAAATGGTGAATCCTTTTATGTTGCTTAAGTAGAATAGAAGCTGTATTCTTTCAGGCCAT  
TGCATTGGTCTTATCTGTTT

In100 candidate3037 (in intron):

LOCUS ENSG00000168702

DESCRIPTION Low-density lipoprotein receptor-related protein 1B precursor  
(ow- density lipoprotein receptor-related protein-deleted in tumor) (LRP- DI).  
[Source:Uniprot/SWISSPROT;Acc:Q9NZR2]

ATATGAGTTTCATTTATGTTTCTACCTTTTTTATAGCCTACAACATAGATAACCGGAAAAATCTTTCTATTGTTACAGTT  
TTGTATTTTTTTCCTGAGCCA

In100 candidate3038 (in intron):

LOCUS ENSG00000168702

DESCRIPTION Low-density lipoprotein receptor-related protein 1B precursor  
(ow- density lipoprotein receptor-related protein-deleted in tumor) (LRP- DI).  
[Source:Uniprot/SWISSPROT;Acc:Q9NZR2]

AAGGATTTAAAAAATTCTTATCACACATTCTGTTTATACTTTTAACAAATCAATACATTCTAGCACTGTTTTTCCTCAGCT  
TGTATTTTTTTGTCTTGACAT

In100 candidate3039 (in intron):

LOCUS ENSG00000168702

DESCRIPTION Low-density lipoprotein receptor-related protein 1B precursor  
(ow- density lipoprotein receptor-related protein-deleted in tumor) (LRP- DI).  
[Source:Uniprot/SWISSPROT;Acc:Q9NZR2]

ATCAAGCTTATGTTTCTAACTACTATAACCATACTGCCTTGTTAACTCTTACTTAACTCTTTAGTTTTGTACCTCTCAGTT  
TGTTTAATATCTCTTTATTG

In100 candidate3040 (in intron):

LOCUS ENSG00000168702

DESCRIPTION Low-density lipoprotein receptor-related protein 1B precursor  
(ow- density lipoprotein receptor-related protein-deleted in tumor) (LRP- DI).  
[Source:Uniprot/SWISSPROT;Acc:Q9NZR2]

TCTAAATGGGAATTTTAATCTTTATCTTATTGGATTCATGCATTGCATATAACCCTTTTGAACATTCTGATATCCCAGAA  
GAGCTCTCATTTCTTATTTT

In100 candidate3041 (in intron):

LOCUS ENSG00000168702

DESCRIPTION Low-density lipoprotein receptor-related protein 1B precursor  
(ow- density lipoprotein receptor-related protein-deleted in tumor) (LRP- DI).

[Source:Uniprot/SWISSPROT;Acc:Q9NZR2]

TTGCCACTCTGTCTTTCACAATGGTTGAACTAATTTACATTTCCACTAACATGTAAAAGCATTCTTACCTCTTGGCAGCC  
TCTGTTGTTTCTTGACTTTT

In100 candidate3042 (in intron):

LOCUS ENSG00000168702

DESCRIPTION Low-density lipoprotein receptor-related protein 1B precursor  
(ow- density lipoprotein receptor-related protein-deleted in tumor) (LRP- DI).

[Source:Uniprot/SWISSPROT;Acc:Q9NZR2]

GCAATATTTGTCTCTTCCCTTAACTTTCTCCTTTTCTTTTTCCTTCCTCTTAACTGCTTACAGTAGATGTACCTTCATCC  
TTTATATACTGCCATTTTCCTT

In100 candidate3043 (in intron):

LOCUS ENSG00000168702

DESCRIPTION Low-density lipoprotein receptor-related protein 1B precursor  
(ow- density lipoprotein receptor-related protein-deleted in tumor) (LRP- DI).

[Source:Uniprot/SWISSPROT;Acc:Q9NZR2]

AAGTAAACAAATTTGCAAATATGAAATCTGAATAATGAGGATTAAGTACTTGTGCTATTTGCATTTTTTTTCAGCT  
TTCCTCTGTCTTGTTTTC

In100 candidate3044 (in intron):

LOCUS ENSG00000168702

DESCRIPTION Low-density lipoprotein receptor-related protein 1B precursor  
(ow- density lipoprotein receptor-related protein-deleted in tumor) (LRP- DI).

[Source:Uniprot/SWISSPROT;Acc:Q9NZR2]

AGCATATTTATAGTAACATTGCAAATAACATTATATAATTTTTTTATCTCAGCCTGAATCAGATTGTATTTTCACATTTT  
TTTGTCTTATTCTCTATTT

In100 candidate3045 (in intron):

LOCUS ENSG00000168702

DESCRIPTION Low-density lipoprotein receptor-related protein 1B precursor  
(ow- density lipoprotein receptor-related protein-deleted in tumor) (LRP- DI).

[Source:Uniprot/SWISSPROT;Acc:Q9NZR2]

AGTTTCCATCCGGATTTTAATAGTATCTCTCTATTTTCTGTGAAATTAACCTCAAACCTTTCTGTCTGCTATTCAGAGCC  
TTCTTCATTTTTTGCTCATTT

In100 candidate3046 (in intron):

LOCUS ENSG00000168702

DESCRIPTION Low-density lipoprotein receptor-related protein 1B precursor  
(ow- density lipoprotein receptor-related protein-deleted in tumor) (LRP- DI).

[Source:Uniprot/SWISSPROT;Acc:Q9NZR2]

AGAGACTGCCTATAACTTCCAAATTCATAGTTTGTTTTTCAGGGATTATTTTTTCTTTTCTTTTCTTTTTTTTTTTTTTTT  
TGGAACAGAGTTTTGCTCT

In100 candidate3047 (in intron):

LOCUS ENSG00000168702

DESCRIPTION Low-density lipoprotein receptor-related protein 1B precursor  
(ow- density lipoprotein receptor-related protein-deleted in tumor) (LRP- DI).

[Source:Uniprot/SWISSPROT;Acc:Q9NZR2]

TTAACATTTGTAGCACTTTTTCTTTATGCTTTTTCCTCTCTTTTCCTATCTCCTCTGGTTTCAGTGGAATATTTTGAT  
AATTCATTTTTTCCTCTTT

In100 candidate3048 (in intron):

LOCUS ENSG00000168702

DESCRIPTION Low-density lipoprotein receptor-related protein 1B precursor  
(ow- density lipoprotein receptor-related protein-deleted in tumor) (LRP- DI).

[Source:Uniprot/SWISSPROT;Acc:Q9NZR2]

TAA AATTGTTTTCTTCTATGTAACATGTCATTTCCCCCTCGCTGCTATTAAGATTTGCTTCTTGTCTCTAGTTTTCAGAA  
GTTTATTTTTTATTTTAAATC

In100 candidate3049 (in intron):

LOCUS ENSG00000168702

DESCRIPTION Low-density lipoprotein receptor-related protein 1B precursor  
(ow- density lipoprotein receptor-related protein-deleted in tumor) (LRP- DI).

[Source:Uniprot/SWISSPROT;Acc:Q9NZR2]

AACACTTATTATGAGGTTATTACTGAAATATCTGACTATAACTGGGTATTAGTCTATTTCTCTCTTCAGTTCTACCAGTT  
TTCACTTATCTTTTGAAATT

In100 candidate3050 (in intron):

LOCUS ENSG00000168702

DESCRIPTION Low-density lipoprotein receptor-related protein 1B precursor  
(ow- density lipoprotein receptor-related protein-deleted in tumor) (LRP- DI).

[Source:Uniprot/SWISSPROT;Acc:Q9NZR2]

ACTAGCTATTAAATAGTGTTTACTATTACTTAACTCTTACTAGTTACTATTTGTTTTACCAGATATTAAC TTCATGCTGT  
ATGTATTTCCCTTCAGTTTT

In100 candidate3051 (in intron):

LOCUS ENSG00000198963

DESCRIPTION Nuclear receptor ROR-beta (Retinoid-related orphan receptor-bet)  
(Nuclear receptor RZR-beta). [Source:Uniprot/SWISSPROT;Acc:Q92753]

AGAGGTTTATCTTTATACATAACTGATCAAATAATCTTCTATTTCCCATCTTACATTTACATTTTATTAAATCAGTCAG  
ATTTTCTTCCTGGTCCCTTT

In100 candidate3052 (in intron):

LOCUS ENSG00000198963

DESCRIPTION Nuclear receptor ROR-beta (Retinoid-related orphan receptor-bet)  
(Nuclear receptor RZR-beta). [Source:Uniprot/SWISSPROT;Acc:Q92753]

TGTTATATCACTTTAACACTTCAAGATGGTTTACTTCAATGTTTATCCTCAAATTACCTTCTCCATTTTACCTCACAGAT  
ATTTTCCCTTAATATTTCTT

In100 candidate3053 (in intron):

LOCUS ENSG00000169826



DESCRIPTION Chondroitin beta-1,4-N-acetylgalactosaminyltransferase 2 (EC 2.1.1.174) (GalNAcT-2) (beta4GalNAcT-2).

[Source:Uniprot/SWISSPROT;Acc:Q8N6G5]EXON

AGATAACGACTTAACTGCCAAATCTTTCTGTTATTCTTTTCATTGCTTTTTTACCTTTGACAACCTAACCAGTATTT  
CTGTCTTAAAATGTTCTTCT

In100 candidate3054 (in intron):

LOCUS ENSG00000119121

DESCRIPTION Transient receptor potential cation channel subfamily M member (EC 2.7.11.1) (Channel kinase 2) (Melastatin-related TRP cation channel 6)

[Source:Uniprot/SWISSPROT;Acc:Q9BX84]

TGTCTGGCCTAACCTGTGGTTTTCTATCTTCCCTTTACTTTTCTCTCTTTTGATTTGGCATGCCCTGCCCAGTGTCTCCT  
ATCAAATTTTGCCCATGTTT

In100 candidate3055 (in intron):

LOCUS ENSG00000119121

DESCRIPTION Transient receptor potential cation channel subfamily M member (EC 2.7.11.1) (Channel kinase 2) (Melastatin-related TRP cation channel 6)

[Source:Uniprot/SWISSPROT;Acc:Q9BX84]

AGTGCTATCAAATCCCTCTAACCACTGTTTTAGCTCTTTCCTACAAATTTTGATGTGTTGTTTTATTTTCATTCAGTG  
AGTCTTTTTATATTTTCGTTT

In100 candidate3056 (in intron):

LOCUS ENSG00000075711

DESCRIPTION Disks large homolog 1 (Synapse-associated protein 97) (SAP-97) hd1g). [Source:Uniprot/SWISSPROT;Acc:Q12959]

TGTACTGTACATACTTTAATATAGTAGTTTGTGATGTCTCCTAACTTTTTATATTATTGATTTTTTATCTTTTCCCAGGG  
CCTTTTAAATTCCTTTTGTT

In100 candidate3057 (in intron):

LOCUS ENSG00000075711

DESCRIPTION Disks large homolog 1 (Synapse-associated protein 97) (SAP-97)  
hdlg). [Source:Uniprot/SWISSPROT;Acc:Q12959]

TATTTAATAATGTTTAACTTCCAAGCTAACTTCCTTTTTTGTGCTTTTTTCTGATTTGCTAATCCAGTATTTGTTTAG  
TCTGAACCTAGTTCTTTTTC

In100 candidate3058 (in intron):

LOCUS ENSG00000156017

DESCRIPTION Uncharacterized protein C9orf41.  
[Source:Uniprot/SWISSPROT;Acc:8N4J0]

TTTAAAATTAATAACTGTTTCTTGTATCTTTTTCTGTCTCTTAAATCTTTATGCCTAACTTTTAGATTTTTCAGCCTTT  
TTGTGGCAATCTTTATGTTT

In100 candidate3059 (in intron):

LOCUS ENSG00000115919

DESCRIPTION Kynureninase (EC 3.7.1.3) (L-kynurenine hydrolase).  
[Source:Unirot/SWISSPROT;Acc:Q16719]

TTTCTGTAAACAATGCTTTAACCCCTGAAAGAACATTCTTATTTTATTTTTCTTCTACAAGACTTTTGGTCAGTTAGTTCA  
TCTCTTTGCACATCAGTTTC

In100 candidate3060 (in intron):

LOCUS ENSG00000075884

DESCRIPTION ARHGAP15 [Source:RefSeq\_peptide;Acc:NP\_060930]

AAATATATCAATATGCATTTGTTTCCTGATCTTGTATATTCTATATTATAACTGTTTCATGAGACCTAATTATTTTCAGGG  
TACTTTTTCTTTTCCCCTTA

In100 candidate3061 (in intron):

LOCUS ENSG00000075884

DESCRIPTION ARHGAP15 [Source:RefSeq\_peptide;Acc:NP\_060930]

AACAAAAAAGGCATTATATCATAAATATGTATAGCTGCTAACTCAATAAACTCCTATTTCTCTGACATCTATCTACAGTG  
TTGCATCCTCTTATTCTTAC

In100 candidate3062 (in intron):

LOCUS ENSG00000075884

DESCRIPTION ARHGAP15 [Source:RefSeq\_peptide;Acc:NP\_060930]

TCACTAAAAACTATTTTTACCACAAATATTTAACATTTTCCAAAATTTTATAAATTGTTTCTTGTCTTCCAGTTTCATGT  
TGTTGGAGGTTTTTTTTCTT

In100 candidate3063 (in intron):

LOCUS ENSG00000075884

DESCRIPTION ARHGAP15 [Source:RefSeq\_peptide;Acc:NP\_060930]

AGGGTAGAACTTCGGGTGTATTTGTATCAAAAGCCTATACTCTTAACCATTATGTTTCATATCTTGTATCTCAGAATTAAA  
CTTTCCTAATTATTTTCTCC

In100 candidate3064 (in intron):

LOCUS ENSG00000204409

DESCRIPTION

TTGCCCGTAAAATCCCATCCTACCTCCCCATTCCACTATTAACGTTTTGTACAATTTTATGCATCCTTCAGTTGTGTAG  
TTACTGCTCTATATTTTCT

In100 candidate3065 (in intron):

LOCUS ENSG00000025293

DESCRIPTION PHD finger protein 20 (Hepatocellular carcinoma-associated antigen  
58) (Glioma-expressed antigen 2) (Transcription factor TZP) (Novel zinc finger  
protein). [Source:Uniprot/SWISSPROT;Acc:Q9BVI0]

CTGAAACACAAATTTTATGAAGTAGTATTTAACCTTAATACATGCATTATACTCTGGTATTTTTTTCAGTTCTTTTTTTT  
TTCGTTTGGGACAGAGTCTT

In100 candidate3066 (in intron):

LOCUS ENSG00000169554

DESCRIPTION Zinc finger homeobox protein 1b (Smad-interacting protein 1)  
(SADIP1). [Source:Uniprot/SWISSPROT;Acc:O60315]

AGTACAACAACATACTAGACTAGATGCTCACCTGTTTTGTTTTGCCAGTTTTTTTTTTTTTTGTTTGTTTGTTTTTT  
TTTGAGATGGAGTCTCGCTC

In100 candidate3067 (in intron):

LOCUS ENSG00000115947

DESCRIPTION Origin recognition complex subunit 4.

[Source:Uniprot/SWISSPROT;Acc:O43929]

ACATACTGACACACTAATTCTTTGAAAAGAAATTTAGAACTCATATCTAACAATCCCTCCCCTTGTATTTCTTACAGCT  
TTCTTTTCAAACCTTTTCTTA

In100 candidate3068 (in intron):

LOCUS ENSG00000141946

DESCRIPTION Zinc finger imprinted 3. [Source:Uniprot/SWISSPROT;Acc:Q96PE6]

EXON

AAAAATGGAAAATAGAAAAAAATATAATAACATTTTCTTTTCTTTTCTTTTCTTTTCTTTTCTTTTCTTTGAGACAGAG  
TTTGTCTCTTGTTGCCCTGG

In100 candidate3069 (in intron):

LOCUS ENSG00000141564

DESCRIPTION Regulatory-associated protein of mTOR (Raptor) (P150 target of  
apamycin (TOR)-scaffold protein). [Source:Uniprot/SWISSPROT;Acc:Q8N122]

TTCTTTAGTGTCTTCAAGTTCTAACTTTTAGGCTTTGTGGATTACTGCATTATTTTATCTTTATTTTCTATTCCAGTA  
CTTTATTTTGTTTCCTTTCT

In100 candidate3070 (in intron):

LOCUS ENSG00000204527

DESCRIPTION double homeobox A [Source:RefSeq\_peptide;Acc:NP\_001012747]

TATCGTGCCCTAGATAACGTGGCGCTTGGTATGGTCTGTGACCTCGTCTGCTTCCCTTTTATTCTTTTTTTTCAGATGTT  
CTGGCCTCCTTGCCTTATGT

In100 candidate3071 (in intron):

LOCUS ENSG00000048028

DESCRIPTION Ubiquitin carboxyl-terminal hydrolase 28 (EC 3.1.2.15) (Ubiquitin thioesterase 28) (Ubiquitin-specific-processing protease 28) (Deubiquitinating enzyme 28). [Source:Uniprot/SWISSPROT;Acc:Q96RU2]

ATTTTTTCTTTTAACTGTTAAGATAGTGAATTTTACTGCTCCATCTAGTATTAATCATTTTTTTTTCCTGCAGTAAAC  
TCAACTTGGTCTTTTTTTTTT

In100 candidate3072 (in intron):

LOCUS ENSG00000197062

DESCRIPTION zinc finger protein 187 [Source:RefSeq\_peptide;Acc:NP\_689949]

AACTTGCTCACACTGATTAACCTCTTTTGTTTGTTATTAGTGCTGCTTAGAGTCTTCTTCTATTTTCTCCATCCAGCT  
TTCCTTTTACTCTCTCATTC

In100 candidate3073 (in intron):

LOCUS ENSG00000158571

DESCRIPTION 6-phosphofructo-2-kinase/fructose-2,6-bisphosphatase 1 (6PF-2-K/ru- 2,6-P2ASE liver isozyme) [Includes: 6-phosphofructo-2-kinase (EC 2.7.1.05); Fructose-2,6-bisphosphatase (EC 3.1.3.46)].  
[Source:Uniprot/SWISSPROT;cc:P16118]

TAAACAAATTCCTTGTCTGATATTTCCAACATCTGTGTCATAACTTACTCTGGTCCTAATGATTGCTTTTCTCTTCAGAC  
ATTGTTTTTATTCCTTGCTT

In100 candidate3074 (in intron):

LOCUS ENSG00000158571

DESCRIPTION 6-phosphofructo-2-kinase/fructose-2,6-biphosphatase 1 (6PF-2-  
K/ru- 2,6-P2ASE liver isozyme) [Includes: 6-phosphofructo-2-kinase (EC  
2.7.1.05); Fructose-2,6-bisphosphatase (EC 3.1.3.46)].

[Source:Uniprot/SWISSPROT;cc:P16118]

TTCTTCATGTCTCCTAACTTTTCCTTCCTATTTTCTATCTCTTTGTATCTTTTGCTGCATCCTGAGTAATTTCTTCAGCT  
TTATCTTCTAGTCACTATTT

In100 candidate3075 (in intron):

LOCUS ENSG00000185621

DESCRIPTION leishmanolysin-like (metallopeptidase M8 family)

[Source:RefSeqpeptide;Acc:NP\_149018]

ATAAACTGCCTCCTAAAACTCTTGAAAAATTTATTTAAAATGTTGTAACCTTTATGCATTAGTTCTGTGTTTTGTCAGCT  
CTTAAAACTTCTTTTTTGCTC

In100 candidate3076 (in intron):

LOCUS ENSG00000165406

DESCRIPTION E3 ubiquitin-protein ligase MARCH8 (EC 6.3.2.-) (Membraneassociated  
RING finger protein 8) (Membrane-associated RING-CH protein VIII)  
(MARH-VIII) (RING finger protein 178) (Cellular modulator of immune recognition  
(c-MIR). [Source:Uniprot/SWISSPROT;Acc:Q5T0T0]

CTGTTTTTTTAGTGGGTAACATATGGAGACCTTGTGGTGTTTCTCTGTCATCTTCCCTGAAATTTCTCAGAGCTTTCAAGT

TTAATTTTGGTCTTCGTTTC

In100 candidate3077 (in intron):

LOCUS ENSG00000172671

DESCRIPTION AN1-type zinc finger and ubiquitin domain-containing protein 1

AN1- type zinc finger protein 4). [Source:Uniprot/SWISSPROT;Acc:Q86XD8]

GGGTCAATTTTCACTATACTTGAGTCTTTTAAACATAAAGATTCAAGTCTTTTATTTTCAGGATTATTTCTTAGAATTT

ATATGTTTTTTTTTTTTTTAGT

In100 candidate3078 (in intron):

LOCUS ENSG00000166741

DESCRIPTION Nicotinamide N-methyltransferase (EC 2.1.1.1).

[Source:Uniprot/WISSPROT;Acc:P40261]

AGTTACATATAACTAATATACATGATATATCTACATATCTTTTTCTACCCTTCTGTTTTTCAGATTATGTTTTCTCTTTTT

AATCCAGACTGACAATTTCT

In100 candidate3079 (in intron):

LOCUS ENSG00000158691

DESCRIPTION Zinc finger protein 96 (Zinc finger protein 305) (Zinc finger ad

SCAN domain-containing protein 12). [Source:Uniprot/SWISSPROT;Acc:O43309]EXON

CCACCTAGTCTCTTCCTCCTACTCTGAAATAGGTTGTAAGTGTACTAATTTTTTCGTGTGTCCTTCCAGATATTTTTTTG

ATGCATATGTTTTCCATATT



In100 candidate3080 (in exon):

LOCUS ENSG00000158691

DESCRIPTION Zinc finger protein 96 (Zinc finger protein 305) (Zinc finger ad  
SCAN domain-containing protein 12). [Source:Uniprot/SWISSPROT;Acc:O43309]EXON

AACTGTCCTTAACAAATTAACTTTCTCTTGGTTTCATGATATTCCTTGTTTCTCAGCTTTGGATTCAAACCTGATCTTCT  
CTTTTTTTGATTATACTTTCC

In100 candidate3081 (in intron):

LOCUS ENSG00000088367

DESCRIPTION Band 4.1-like protein 1 (Neuronal protein 4.1) (4.1N).  
[Source:niprot/SWISSPROT;Acc:Q9H4G0]

TGTTTCGTCTTTGGATCATTAACCTTCCTATTACTGTGGTCTCACTTTTTTCAGTTCCCCCTATTTCTTTGGCATCATCTC  
ATGGCCTTTTACTTTCTTGT

In100 candidate3082 (in intron):

LOCUS ENSG00000197969

DESCRIPTION Vacuolar protein sorting-associated protein 13A (Chorein)  
(Choraacanthocytosis  
protein). [Source:Uniprot/SWISSPROT;Acc:Q96RL7]

TGAATTTGCATGCCTGATGTCATTAACCATAGAATATCCTTCCTGAAAGTATTTCTTTCTTGGCTCAGTGATACTTTTC  
TGTCTATATTATACACCTTC

In100 candidate3083 (in intron):

LOCUS ENSG00000197969

DESCRIPTION Vacuolar protein sorting-associated protein 13A (Chorein)  
(Choraacanthocytosis

protein). [Source:Uniprot/SWISSPROT;Acc:Q96RL7]

AGGCTACTGATTTTCTGTTTACTGGTTGTGTTGAAGCCTCTGATTATAACCATTGATTTGCCTGTTTCTCCTTTCAGTTC  
TTTAAGTTTTTTGCTTTGTA

In100 candidate3084 (in intron):

LOCUS ENSG00000137634

DESCRIPTION Protein FAM55D precursor.

[Source:Uniprot/SWISSPROT;Acc:Q6UWF7]EXON

GAATCTATCCTGAACTTTTTGTGTTGGCAATTTTTTAACTATCATTTCAATCTCACTGTTTGTACTGGTCTGTTTCAGAG  
ATTCTATATCTTCCTGGTTT

In100 candidate3085 (in intron):

LOCUS ENSG00000204179

DESCRIPTION protein tyrosine phosphatase, non-receptor type 20A isoform 2

[Source:RefSeq\_peptide;Acc:NP\_001035846]

AGGAATTTATGGTAAATATTTTCTTAACGAAAGTCTATATGTGATTTCTTTTTTTATATCATTGCCAGAGGGTTTCTTTT  
CTTTTCTTTCTTTATTTGGT

In100 candidate3086 (in intron):

LOCUS ENSG00000182389

DESCRIPTION Voltage-dependent L-type calcium channel subunit beta-4 (CAB4)

Calcium channel voltage-dependent subunit beta 4).

[Source:Uniprot/SWISSPRO;Acc:O00305]

AGTATAACCTAGTGAGGTCTTTTTTCTGAGTCCAGTTCTTACTTTCTGTATGTATTTTTCTGGTTGTCTTTATTCCTAT  
TCTACTGACCTCAATATTTT

In100 candidate3087 (in intron):

LOCUS ENSG00000156049

DESCRIPTION Guanine nucleotide-binding protein alpha-14 subunit (G-protein  
lpha subunit 14). [Source:Uniprot/SWISSPROT;Acc:O95837]

CCTTCTAACTTAGATTTTTATATGAAATATATTTTCCTGCTTCCTTGCTCCTCTCTGTTTCAGTCTTATCCCTGCTTCTAT  
ATCCTCTGATTAAAGGCTTT

In100 candidate3088 (in intron):

LOCUS ENSG00000121417

DESCRIPTION Zinc finger protein 134. [Source:Uniprot/SWISSPROT;Acc:P52741]

EXON

AACTTGAATTTATACAACTTAACTTCTTTAACTTTCCCTTGTTCTTTTTTGTGCCGTGTTGTTCTGGGCCAGTGTTAGTT  
GCTCACATGTCCTGTCTTTC

In100 candidate3089 (in intron):

LOCUS ENSG00000115145

DESCRIPTION Signal transducing adapter molecule 2 (STAM-2).

[Source:UniprotSWISSPROT;Acc:O75886]

TCCAAGTCATGACTTGTCTGTTCTAAGCCTTAACTCCGGTTCTTGTTTGCATATCTTTTTTCCCTTTACTCAAGCCAGGC  
AATCTTTCTTGCCAGTTTTTC

In100 candidate3090 (in intron):

LOCUS ENSG00000080845

DESCRIPTION Disks large-associated protein 4 (DAP-4) (SAP90/PSD-95-associated

protein 4) (SAPAP4) (PSD-95/SAP90-binding protein 4).

[Source:Uniprot/SWISPROT;Acc:Q9Y2H0]

CCACCCTTCTCCCTTCTTTGGATTTATTTTGGTGTTTCTTTTCTAACTTTTGGAGTTGTTTATCATATTGCTTTTCAGTT  
TGTTTTTTTTCTTTTCTTTTT

In100 candidate3091 (in intron):

LOCUS ENSG00000156052

DESCRIPTION Guanine nucleotide-binding protein G(q) subunit alpha (Guanine  
nucleotide-binding protein alpha-q). [Source:Uniprot/SWISSPROT;Acc:P50148]

AAGGCTATTCCTGAAAGATGCCTAGCATTTTAATATTTAACCTCTTTCCTCTTTCCTCATTACTTTGTTTCATTTTCAGTC  
ACTTGTCCTTTTTTTAAACT

In100 candidate3092 (in intron):

LOCUS ENSG00000156052

DESCRIPTION Guanine nucleotide-binding protein G(q) subunit alpha (Guanine  
nucleotide-binding protein alpha-q). [Source:Uniprot/SWISSPROT;Acc:P50148]

TGGATCTGTTTCATTTCTGATAGATGGATGTTGAAGTTTCTAACTGTAATAGCGGGTTTATCTGTTTTCTTCTATCAGTT  
TTTGCCTCATGTTTTGTGAT

In100 candidate3093 (in intron):

LOCUS ENSG00000157827

DESCRIPTION formin-like 2 [Source:RefSeq\_peptide;Acc:NP\_443137]

CTCTTCTGTTTCTTTACAAGTCCCTAACTTGGAAGTTTTTTTTTTTTCTTTTCGTTTTTTAATCCCTGTCCCAGATTA  
GGCCTGTGCTTTCTCTCCTT

In100 candidate3094 (in intron):

LOCUS ENSG00000102349

DESCRIPTION Krueppel-like factor 8 (Basic krueppel-like factor 3) (Zinc finger protein 741). [Source:Uniprot/SWISSPROT;Acc:O95600]

TCCATGATACTATCTAACTGGCTCATACCTTTCTTTTTTTTTCTCTCTTTTTTTAAAGCTGGGCTGCTTTCTCAGGGTTC  
ATACATTTCTGTGCCACTTT

In100 candidate3095 (in intron):

LOCUS ENSG00000204694

DESCRIPTION Olfactory receptor 5V1 (Olfactory receptor OR6-26) (Hs6M1-21).

Source:Uniprot/SWISSPROT;Acc:Q9UGF6]

GGTGATAACTCCTTTACCATTTTTTATTGTGTCTATTTGATTCTTCTCTTTTTCTTCTTTACTAGTCTGGCTAGCAGTC  
TATCTCTTTTGTTAATCTTC

In100 candidate3096 (in intron):

LOCUS ENSG00000204272

DESCRIPTION

TTAACATTTTATCACGTTTGCCTTATCATTCCTGTTTTTCTCTTCCTCTCCTCCTTCTCCTATTTGACAGTAGTTTGCAAA  
TATCATTCCTTTACCTCT

In100 candidate3097 (in intron):

LOCUS ENSG00000198466

DESCRIPTION Zinc finger protein 587. [Source:Uniprot/SWISSPROT;Acc:Q96SQ5]

EXON

AAAATAATGAAATAACAAAGACGTATGTTGGACTTCATTCATTCTTCAGTGATGTCACTTTGCTGCAAGGAATATTTGGT  
TTTCTTTTTTTTTTTTTTTTTT

In100 candidate3098 (in intron):

LOCUS ENSG00000123612

DESCRIPTION Activin receptor type 1C precursor (EC 2.7.11.30) (ACTR-IC)  
(Acivin receptor-like kinase 7) (ALK-7).

[Source:Uniprot/SWISSPROT;Acc:Q8NER5]EXON

TGAGTTTAACTGGTCTACCTCTATCATCTCTTAACTTGTCAGTGGCTTTTTGCATGATTCCAAATGATCTCTAACTTCAC  
TTTCATTTTTTAATTCCTTT

In100 candidate3099 (in intron):

LOCUS ENSG00000101082

DESCRIPTION Src-like-adapter 2 (Src-like adapter protein 2) (SLAP-2)  
(Modultor of antigen receptor signaling) (MARS).

[Source:Uniprot/SWISSPROT;Acc:Q96Q3]

GCAAATCCTTTTTTCGACTCTGCTTGTCTTCCATAACTTCTATGGTTTTAATCTTGCCATACTTTTCAGAGGTCTCTCAA  
ATTATATTCTTCTGTATCTT

In100 candidate3100 (in intron):

LOCUS ENSG00000153237

DESCRIPTION CDNA FLJ25376 fis, clone TST02010.

[Source:Uniprot/SPTREMBL;Acc:Q96LM2]

CTGCAATCACCAAAATATAGACTTTTAACCCATCTTCATCTTCTTTTAGCTTGATGCCTTCTGTATCAGGTCTGTATGAC  
TCCTATCAAAATTTTCCTCT

In100 candidate3101 (in intron):

LOCUS ENSG00000131089

DESCRIPTION Rho guanine nucleotide exchange factor 9 (Rac/Cdc42 guanine  
nucleotide exchange factor 9) (Collybistin) (PEM-2 homolog).

[Source:Uniprot/SWSSPROT;Acc:O43307]

TGGGAACATTGATATGATGAGTCTTCAAATCCATGAACATTTAACTGTTTATTTTCGATTTTTTTGTGATTTCTCCCAGGA  
TTGTTTTTTAGTTTTTCATG

In100 candidate3102 (in intron):

LOCUS ENSG00000131089

DESCRIPTION Rho guanine nucleotide exchange factor 9 (Rac/Cdc42 guanine  
nucleotide exchange factor 9) (Collybistin) (PEM-2 homolog).

[Source:Uniprot/SWSSPROT;Acc:O43307]

AGATCACTGCGACTCCTGCTACTTTGCTGATACTGATATAACCAATCCCTATTCTTTGCTCTCTGCTGTTTCCAGACATC  
TAGGCTATATCTGTCTTTTC

In100 candidate3103 (in intron):

LOCUS ENSG00000163331

DESCRIPTION death-associated protein-like 1 (LOC92196), mRNA

[Source:RefSeqdna;Acc:NM\_001017920]

CATTTTGGACCTGAAAAAATAGCAAATGTACACACTTAGACCTAATAAATAACCCTAACTCTTCTTAACTTCTTTCAGAG  
GTTCTTTCTTTCTTTTGACA

In100 candidate3104 (in intron):

LOCUS ENSG00000196781

DESCRIPTION Transducin-like enhancer protein 1 (ESG1) (E(Sp1) homolog).

[Sorce:Uniprot/SWISSPROT;Acc:Q04724]

AGGAGTGGTAACTTCTGGTGGCCCCTGGTTTATAAATTGTTCTTGTTTCCATTATCTTCAGTTCCTCTCTCCTTATTTAA  
TGCTTCCCTAGTATATCTTA

In100 candidate3105 (in intron):

LOCUS ENSG00000196781

DESCRIPTION Transducin-like enhancer protein 1 (ESG1) (E(Sp1) homolog).

[Sorce:Uniprot/SWISSPROT;Acc:Q04724]

AAGGTTTCCTTTTCTCCACACCATCACTAACACTATCTTTGTCTTTTTGTTACCCACCATTTTCAGCAGGTTTGAGGTGAC  
ATTTCTTTCTTTCTTTCTTT

In100 candidate3106 (in intron):

LOCUS ENSG00000115183

DESCRIPTION TPR domain, ankyrin-repeat and coiled-coil-containing

[Source:RfSeq\_peptide;Acc:NP\_203752]



CTCTTAACTCTGATACTTTTTAGACAATTTTTTTCATTATCTTCCTATCAGAGTTTCTCCCTCGCTCCTCTTCTCTGTAG  
AGTGATTTAGCAGCTTATTT

In100 candidate3107 (in intron):

LOCUS ENSG00000196151

DESCRIPTION WD repeat, SAM and U-box domain-containing protein 1.

[Source:Uiprot/SWISSPROT;Acc:Q8N9V3]

GAGTCTGTTTCTTAACTACTGTTTCTGCTATTTTGTTCTGTTTCTGTCCTTGCTCTAATATCATTCTGTCTCTCCCAGGC  
TTTATATTTTGTCTATTCCT

In100 candidate3108 (in intron):

LOCUS ENSG00000123636

DESCRIPTION Bromodomain adjacent to zinc finger domain protein 2B

(hWALp4).[Source:Uniprot/SWISSPROT;Acc:Q9UIF8]

AGTTTTAACTGTTTTTCGATGCTTATTTTGTCTGTTGTTTCAGACTGGATAATTTCTATTGATCTACCTTTGAGTTCATTG  
GCTCTTTTTTTTTTATCATCT

In100 candidate3109 (in intron):

LOCUS ENSG00000123636

DESCRIPTION Bromodomain adjacent to zinc finger domain protein 2B

(hWALp4).[Source:Uniprot/SWISSPROT;Acc:Q9UIF8]

GAAGCTCTACCATTCACATCTTTTTATTAACTGATCTTATTGTTTTGTATTTCTTCTGTGGTGTGTCAGGTTATTTATAA  
CACACATTTTCCCATTGTTT

In100 candidate3110 (in intron):

LOCUS ENSG00000183675

DESCRIPTION protein tyrosine phosphatase, non-receptor type 20 isoform 8

[Source:RefSeq\_peptide;Acc:NP\_001035822]

AGGAATTTATGGTAAATATTTTCTTAACGAAAGTCTATATGTGATTTCTTTTTTTATATCATTGCCAGAGGGTTTCTTTT  
CTTTTCTTTCTTTATTTGGT

In100 candidate3111 (in intron):

LOCUS ENSG00000110274

DESCRIPTION centrosomal protein 164kDa [Source:RefSeq\_peptide;Acc:NP\_055771

GCCTAGTTAACCTTGAAGAAGCTTTCTTGGGCTCTTCCCCTCCCCCGGCCTTTTTTTTTTTTTTTTTTTAAGAGACCAGAG  
TTTTGCTCTGTTGTCCATGC

In100 candidate3112 (in intron):

LOCUS ENSG00000177103

DESCRIPTION Down syndrome cell adhesion molecule-like protein 1 precursor

(own syndrome cell adhesion molecule 2). [Source:Uniprot/SWISSPROT;Acc:Q8TD8]

AGGGCACATGATTTTAACTACTCATGGGGCACCTTTGTATTTCACTACAGATACCAGTTATTTTTCCTCCTTTGTCTGTC  
TGAAGCCTATGCATCTTTCA

In100 candidate3113 (in intron):

LOCUS ENSG00000186788

DESCRIPTION CDNA FLJ46321 fis, clone TESTI4043067.

[Source:Uniprot/SPTREMBLAcc:Q6ZQQ2]

TTCTTCATGTCCATTGTGATTTTTTTTATTTCTAACATTCCTTTTTGATTCTTAGAGTTTCCATCTCTTTATTTACAGTC  
GTCATCTGTTCTTGCATGTT

In100 candidate3114 (in intron):

LOCUS ENSG00000126542

DESCRIPTION Protein tyrosine phosphatase, non-receptor type 20C  
(Fragment).[Source:Uniprot/SPTREMBL;Acc:Q5SWJ0]

AGGAATTTATGGTAAATATTTTCTTAACGAAAGTCTATATGTGATTTCTTTTTTTATATCATTGCCAGAGGGTTTCTTTT  
CTTTTCTTTCTTTATTTGGT

In100 candidate3115 (in intron):

LOCUS ENSG00000170324

DESCRIPTION FERM and PDZ domain containing 2 isoform 3  
[Source:RefSeq\_peptide;Acc:NP\_001018081]

TTTGTGCCTTCATATTTAAAGGGGATTTCTTCTAGACAACATAACTGGGTTTTATTTTTTAATCTACTCTGTCAGTTTCT  
GTCTTTTAACTGGCATACTT

In100 candidate3116 (in intron):

LOCUS ENSG00000165105

DESCRIPTION RAS and EF hand domain containing  
[Source:RefSeq\_peptide;Acc:NP689786]

GTAGTACAATTGTTACAATTAATGAACTGATTATTGATTCACTATTATTAATAAGTCCATATTCGGATTTCTCAGTT  
TTTCCCTAAAGTCCCTTTTT

In100 candidate3117 (in intron):

LOCUS ENSG00000165105

DESCRIPTION RAS and EF hand domain containing

[Source:RefSeq\_peptide;Acc:NP689786]

GCTATGGAATAATGAAGAGTTAGTAACTTTGCTAATATCTTCTTTACTTTCTAATGATTTTATTTTCAGTATCAGGTTTC  
CTAGTGTTTTTTTATGTTTTT

In100 candidate3118 (in intron):

LOCUS ENSG00000147065

DESCRIPTION Moesin (Membrane-organizing extension spike protein).

[Source:Uiprot/SWISSPROT;Acc:P26038]

TTTTTTTTTAACTGTGGAAAGCAATGCCATACCTCTTCTTTCTGCTTTAGCCTATGTTCTTTCCTTCAGCTTGAAATTC  
AGGTGCCTCTTCTTCATCTC

In100 candidate3119 (in intron):

LOCUS ENSG00000147065

DESCRIPTION Moesin (Membrane-organizing extension spike protein).

[Source:Uiprot/SWISSPROT;Acc:P26038]

AGTTTCTCATCTGTACAATGCCTAACTTGTTTCTCAAATCTGGTTATCTCTCAGAAAATTTATCTCTGGCATTTATTTGT  
GCATTCCATCTCTCTTTCTC

In100 candidate3120 (in intron):

LOCUS ENSG00000153250

DESCRIPTION RNA-binding motif, single-stranded-interacting protein 1  
(Singlstranded

DNA-binding protein MSSP-1) (Suppressor of CDC2 with RNA- bindin motif  
2). [Source:Uniprot/SWISSPROT;Acc:P29558]

CATATATGTTTATATATTTAGGCTTTAACAATTTTTTTAATTGTGTCATTCTTGATTTTCAGGTAAAATTTATTTTGGAC  
TCAGTTCTCTTTACCTATTC

In100 candidate3121 (in intron):

LOCUS ENSG00000172159

DESCRIPTION FERM domain containing 3. [Source:Uniprot/SPTREMBL;Acc:Q5VZA1]

EXON

TCTCTTCTGTAAACACATGATGAGATTATTTCTGAGTTTCTTCTCCACTCTGATTGTTCTTTAATAATTCTTTCTCCAGAT  
TGCTACTGCTCTTATTTACA

In100 candidate3122 (in intron):

LOCUS ENSG00000136560

DESCRIPTION TRAF family member-associated NF-kappa-B activator (TRAFinterating  
protein) (I-TRAF). [Source:Uniprot/SWISSPROT;Acc:Q92844]

CTATGTGGATAACCCTTTTTCATGATGCATTTTGTCCATTTGTCTTTTCTTTTTTTTTCTGATTGGATGTCACAGAACTA  
ATTTCTTGATCTATTTCTT

In100 candidate3123 (in intron):

LOCUS ENSG00000089472

DESCRIPTION Hephaestin precursor (EC 1.-.-.-).  
[Source:Uniprot/SWISSPROT;Ac:Q9BQS7]

TTCTGCCTTCTGCCTGCTCAAATCTGCTGTTTAACTCTTCTAGTGAATTAAAATTTCAATTCTCCTTTTCTATTCAGAA

TTTGTTTGGTTCCTTTTAT

In100 candidate3124 (in intron):

LOCUS ENSG00000115233

DESCRIPTION 26S proteasome non-ATPase regulatory subunit 14 (26S proteasomeregulatory subunit rpn11) (26S proteasome-associated PAD1 homolog 1). [Source:Uniprot/SWISSPROT;Acc:O00487]

CATGTGGCTTGCTTCCTCTCTCTCGAGGTAAGTCTAGTTGGTATTTTCTTTTCTGTTCCATTGGCTTGCAGTAGTACCT  
TAATTTATTCATTCATTCTT

In100 candidate3125 (in intron):

LOCUS ENSG00000144290

DESCRIPTION Sodium-driven chloride bicarbonate exchanger (Solute carrier family 4 member 10). [Source:Uniprot/SWISSPROT;Acc:Q6U841]

GTCAATTAAGTCGGTAAACATTTTACTAACTTTCTTTTGTATTCCATTTACAAGTTTGTGCTATCAGTATTTCTCTAT  
GAAGTAAGCTTTCTCTTTCT

In100 candidate3126 (in intron):

LOCUS ENSG00000144290

DESCRIPTION Sodium-driven chloride bicarbonate exchanger (Solute carrier family 4 member 10). [Source:Uniprot/SWISSPROT;Acc:Q6U841]

AACCTGATTTAACAAGTGTTACTGTAATATTGGATTTCCCTTAATTCCTTACTCGTTTAGTCATTCCTTTACCCTCAGCT  
TCTATTCTTTTTTCTCTTCA

In100 candidate3127 (in intron):

LOCUS ENSG00000144290

DESCRIPTION Sodium-driven chloride bicarbonate exchanger (Solute carrier family 4 member 10). [Source:Uniprot/SWISSPROT;Acc:Q6U841]

AGCTCCTGGATTCATTAAC TTTTGAAGGG TTTTATGTCTCTATTTCCCTCAGTTCTGCTCTGATTTTAGTTATTTCT  
TGCCTTCTGCTAGTTTTCGA

In100 candidate3128 (in intron):

LOCUS ENSG00000197635

DESCRIPTION Dipeptidyl peptidase 4 (EC 3.4.14.5) (Dipeptidyl peptidase IV) (DPP IV) (T-cell activation antigen CD26) (TP103) (Adenosine deaminase complexing protein 2) (ADABP) [Contains: Dipeptidyl peptidase 4 membrane form (Dipeptidyl peptidase IV membrane form); Di [Source:Uniprot/SWISSPROT;Acc:P2748]

TGTTTATAATAGCCTCTTATGATCTTTTAACATCTGTGGAGTCTGTTGTGATATCCCATTTTTTCCTTTCTGATACCAGTC  
ATTTGTGCTGTTTTACTCCT

In100 candidate3129 (in intron):

LOCUS ENSG00000128805

DESCRIPTION Rho GTPase activating protein 2  
[Source:RefSeq\_peptide;Acc:NP\_07049]

CTGTTGTTATTTATAACACTTCCTCAATTTAATTTCTGTTCTCCATTCTATATCATAAACCTCATTCAGGTGGGGCTTCA  
ATCTGTCTTATTATTTCTCT

In100 candidate3130 (in intron):

LOCUS ENSG00000128815

DESCRIPTION Uncharacterized protein C10orf64.

[Source:Uniprot/SWISSPROT;AccQ6ZS81]

GACTTTGAAGGAACAATTACTGAGAGGAGTGTTGAACTCTCTAACTATAATTGTGGATTTGGCCATTTGTCCTTTCAGAT  
CTATGAGTTTTTCTTTCTGA

In100 candidate3131 (in intron):

LOCUS ENSG00000128815

DESCRIPTION Uncharacterized protein C10orf64.

[Source:Uniprot/SWISSPROT;AccQ6ZS81]

ATTCATTTAATTTGCACAAATGGTCTCCTTTAACTCATGTCATTTTCTGTGTGATTGTTTCTCCCTTCGTATTCTCAGTT  
TGTGTCCTGCTTTCTCCTTC

In100 candidate3132 (in intron):

LOCUS ENSG00000165113

DESCRIPTION G kinase anchoring protein 1 [Source:RefSeq\_peptide;Acc:NP\_07947]

AAGCCTAACATTTGCTTAGGATTCTGCTTTTTTCAGTTATTGAAGGAGGCAGCCTGTCATCACTTTAGGTTTTCTTTTTG  
TTTCCTTATTTCTTCTCCC

In100 candidate3133 (in intron):

LOCUS ENSG00000165383

DESCRIPTION Leucine-rich repeat-containing protein 18.

[Source:Uniprot/SWISPROT;Acc:Q8N456]



GGATTTAGTAAATCCTCCCTTTAACTCCTGATATGTGTAATTTGGCTTCTCTTTCTTTTTTTTTTAAATTGTCAGTCTGG  
CTATCTGTTTCATTAATCTT

In100 candidate3134 (in intron):

LOCUS ENSG00000115271

DESCRIPTION Grancalcin. [Source:Uniprot/SWISSPROT;Acc:P28676]

GCTAATCTTTGTTCTTTGATTAGATGAACTTAATTGCTTCAATTTACTAACTAATAAAGGGATGTATTTTTTTGCCAGCA  
AGTTCCTTTGTTTGTTTTCA

In100 candidate3135 (in intron):

LOCUS ENSG00000184611

DESCRIPTION Potassium voltage-gated channel subfamily H member 7 (Voltagegated  
potassium channel subunit Kv11.3) (Ether-a-go-go-related gene  
potassiumchannel 3) (HERG-3) (Ether-a-go-go-related protein 3) (Eag- related  
protein3). [Source:Uniprot/SWISSPROT;Acc:Q9NS40]

CTCTATGACCCTTTACTTGATATCCACCTGAACATATAACTTCTCACTCTATCCTCTATAATTCTTAAGCTCTTTCAGAT  
TTTAAATCTTTCTGACCATC

In100 candidate3136 (in intron):

LOCUS ENSG00000184611

DESCRIPTION Potassium voltage-gated channel subfamily H member 7 (Voltagegated  
potassium channel subunit Kv11.3) (Ether-a-go-go-related gene  
potassiumchannel 3) (HERG-3) (Ether-a-go-go-related protein 3) (Eag- related  
protein3). [Source:Uniprot/SWISSPROT;Acc:Q9NS40]

TAGGTATTCTGTGTCTAAATATTTATTGTCTTAATTAACAAATCGCCTGTTTGCTGACATTTTCTCAGTTGTTTTTCCT  
ACAGTTAGTGTTTTGTATTT

In100 candidate3137 (in intron):

LOCUS ENSG00000184611

DESCRIPTION Potassium voltage-gated channel subfamily H member 7 (Voltagegated potassium channel subunit Kv11.3) (Ether-a-go-go-related gene potassiumchannel 3) (HERG-3) (Ether-a-go-go-related protein 3) (Eag- related protein3). [Source:Uniprot/SWISSPROT;Acc:Q9NS40]

AGGATCTGAGTCCTTCTGTCCTCATTAACCTAACACATCTTCCATTTTGTCCAACAGTTGTGTTTTCTCTGAACCTGGC  
TTTCACATTTATTGTCTTAC

In100 candidate3138 (in intron):

LOCUS ENSG00000079482

DESCRIPTION Oligophrenin 1. [Source:Uniprot/SWISSPROT;Acc:O60890]

CTTATAGGATTTCCTTTTCAATAACTTGCTGAACCTTTATCTTTCTGTTTTTTACACCTTGACTGTGTGTTTCCTACAGTT  
CTATCTTTGTTCTTGGTTTA

In100 candidate3139 (in intron):

LOCUS ENSG00000079482

DESCRIPTION Oligophrenin 1. [Source:Uniprot/SWISSPROT;Acc:O60890]

AGGGAGAATCAATTGGCATATGGATTTATATTAAGCTGCTAACTAGGGTAGCCTCCATCCTTTTTTCAGGTAGCACCTTC  
CTCTTTTACATATATATCAT

In100 candidate3140 (in intron):

LOCUS ENSG00000079482

DESCRIPTION Oligophrenin 1. [Source:Uniprot/SWISSPROT;Acc:O60890]

AAATCGCCTTTTAATAACTGCATCCTTAGCATAACAATTGTGCTCACTCTAACATCTTCTCTTTTGTTCCTCTACAGCT  
CTGTCTCTGTCTGTCACTTT

In100 candidate3141 (in intron):

LOCUS ENSG00000115290

DESCRIPTION Growth factor receptor-bound protein 14 (GRB14 adapter protein)

[Source:Uniprot/SWISSPROT;Acc:Q14449]

TAACTTAGCCCTTCTGCTCTCCATTTAGTGTGGTCTGGTTATTCTTTCCTGAGTATTGTTCACTCCTTCTTCCTCAGTA  
TGTTTGCTCATGTTTGTCCT

In100 candidate3142 (in intron):

LOCUS ENSG00000082438

DESCRIPTION Cordon-bleu protein-like 1. [Source:Uniprot/SWISSPROT;Acc:Q53SF]

TCATTTTGCTCAAATTAACCTTCTCCTTCTGCAAATATTACTCCCACTGTTGACTTTCATTTCTTTTCTTTCCCCAGGT  
TTTTCATTGCTTAAATATTT

In100 candidate3143 (in intron):

LOCUS ENSG00000082438

DESCRIPTION Cordon-bleu protein-like 1. [Source:Uniprot/SWISSPROT;Acc:Q53SF]

CAATTAGGACATTCCTAACTTCTTTCCTTATTTTTTTTTTTTTTTGTCAGAGCATGTAACACCATCTGATATTTTATATAT  
TTTACTTGTTTCTTTTTTCT

In100 candidate3144 (in exon):

LOCUS ENSG00000110367

DESCRIPTION Probable ATP-dependent RNA helicase DDX6 (EC 3.6.1.-) (DEAD boxprotein 6) (ATP-dependent RNA helicase p54) (Oncogene RCK).

[Source:UniprotSWISSPROT;Acc:P26196]

GGAATCAACAATAGTAACTCTTTCTTTCCGTTTTTTTTTCTTTTCTTTTAAAAAATGTCTTCTTATTTTGGTTTCAGGT  
TGAAGTCTCTTCCCTTTCTA

In100 candidate3145 (in intron):

LOCUS ENSG00000178662

DESCRIPTION TGF-beta-induced apoptosis protein 2 (TAIP-2).

[Source:Uniprot/WISSPROT;Acc:Q8WYN3]

GTGGTTTTTCTGTAATGATAACATTTAATTTGTTTCTCATTTGTTTCTTTCTCATTTGTGTATCTGCTGTACCAGTACAT  
TTTATACTTTTATGTATTTT

In100 candidate3146 (in intron):

LOCUS ENSG00000144285

DESCRIPTION Sodium channel protein type 1 subunit alpha (Sodium channel proein type I subunit alpha) (Voltage-gated sodium channel subunit alpha Nav1.) (Sodium channel protein, brain I subunit alpha).

[Source:Uniprot/SWISSPRO;Acc:P35498]

GGAAAGTAAATAAATATCATCACTTGGAAGTAACTGCTGCCATTCACATTTTGTTTTCTGTTTCAGAGTATTTCTGCACAT  
ACTCTTATTGTTGTACTTTT

In100 candidate3147 (in intron):

LOCUS ENSG00000158813

DESCRIPTION Ectodysplasin-A (Ectodermal dysplasia protein) (EDA protein)

[Cnains: Ectodysplasin-A, membrane form; Ectodysplasin-A, secreted form].

[Surce:Uniprot/SWISSPROT;Acc:Q92838]

CTTAACTTCCAATTCATTAATTCTGTCTTCAGCTTTGTCTAAACTCCCTTTAAACTCACTCATTGAGTTCTTAATATTAT  
TTGTCATGTTTTTTATTTTT

In100 candidate3148 (in intron):

LOCUS ENSG00000148053

DESCRIPTION BDNF/NT-3 growth factors receptor precursor (EC 2.7.10.1)

(Neurtrophic tyrosine kinase receptor type 2) (TrkB tyrosine kinase) (GP145-TrkB  
(Trk-B). [Source:Uniprot/SWISSPROT;Acc:Q16620]

GCTGAGTGTTTTTATGTATATGTTTTGTTGACGCTTCTTAAGAGTTCATAACATTCTCTGGTATATCATACTTTTCAGAT  
CATAAGTATACTTTTTTCTT

In100 candidate3149 (in intron):

LOCUS ENSG00000148053

DESCRIPTION BDNF/NT-3 growth factors receptor precursor (EC 2.7.10.1)

(Neurtrophic tyrosine kinase receptor type 2) (TrkB tyrosine kinase) (GP145-TrkB  
(Trk-B). [Source:Uniprot/SWISSPROT;Acc:Q16620]

TGATTAGAGCACATTCCCCTTAGAATTGTTGAGTTTTAACTGTGCAATAACTTTGGCTTTCCTTACAAATTCCAGCTTTG  
CCAAGTGTGCTTTCTACTTT

In100 candidate3150 (in intron):

LOCUS ENSG00000148053

DESCRIPTION BDNF/NT-3 growth factors receptor precursor (EC 2.7.10.1)  
(Neurtrophic tyrosine kinase receptor type 2) (TrkB tyrosine kinase) (GP145-TrkB  
(Trk-B). [Source:Uniprot/SWISSPROT;Acc:Q16620]

AGAGCACGTTTGCTTTGTCCGTTATAACTGAAGATGGATTTGCTGTTTTTTATTGCCTTCAGGTGAATTTTCTCATCACT  
CTTGAACCTTTAGTACTTCCC

In100 candidate3151 (in intron):

LOCUS ENSG00000148053

DESCRIPTION BDNF/NT-3 growth factors receptor precursor (EC 2.7.10.1)  
(Neurtrophic tyrosine kinase receptor type 2) (TrkB tyrosine kinase) (GP145-TrkB  
(Trk-B). [Source:Uniprot/SWISSPROT;Acc:Q16620]

AGGACCCAAGAATCTTCATGCTTGCATTTCTACTTAACACCTTGTCTTAACTTCCTATTTTATTTCTCTTGACTTCAGTT  
ATTATTACAGTTTTTTGTTTT

In100 candidate3152 (in intron):

LOCUS ENSG00000089289

DESCRIPTION Immunoglobulin-binding protein 1 (CD79a-binding protein 1) (B cell  
signal transduction molecule alpha 4) (Alpha 4 protein) (Renal carcinomaantigen  
NY-REN-16). [Source:Uniprot/SWISSPROT;Acc:P78318]

AGTCTCTTTAAGTAGTTAACAACTATTATTCTCTCTTTGCTTCATGTTTGTTTCCTTCTTGGCACTTGTGTGCAGTCATT  
TCATGTGTCTTTCTGAGTTT

In100 candidate3153 (in intron):

LOCUS ENSG00000163092

DESCRIPTION cardiomyopathy associated 3 isoform 1

[Source:RefSeq\_peptide;Ac:NP\_689594]

ATTAATTTAACAAATACCGTAAGTGACTATTTTTTTCCTTCCCTGTCCTCCTATGACTGATTTTCATACTCTATCAGGT  
TCTTTTCAAAAATCTTCTCA

In100 candidate3154 (in intron):

LOCUS ENSG00000163092

DESCRIPTION cardiomyopathy associated 3 isoform 1

[Source:RefSeq\_peptide;Ac:NP\_689594]

ATTTTTTTTAACAAGGAAGCTTCCTTATTATACCTTACCTTTTTTTCCTCCAGAACAAATATCATTGATTCTCTATAGTTC  
TTTCATTCATTCCTGTCTTT

In100 candidate3155 (in intron):

LOCUS ENSG00000198648

DESCRIPTION STE20/SPS1-related proline-alanine-rich protein kinase (EC  
2.7.1.1) (Ste-20-related kinase) (Serine/threonine-protein kinase 39) (DCHT).

[Source:Uniprot/SWISSPROT;Acc:Q9UEW8]

TATTTTAAATACAATATATAACCATAAAGCTTTTCTTTTCTATGCTTTAGTTAATTATTCTTCCAAAACTCTTCAGCT  
TGCCTTTTTTCCCCTTCTTG

In100 candidate3156 (in intron):

LOCUS ENSG00000198648

DESCRIPTION STE20/SPS1-related proline-alanine-rich protein kinase (EC  
2.7.1.1) (Ste-20-related kinase) (Serine/threonine-protein kinase 39) (DCHT).

[ource:Uniprot/SWISSPROT;Acc:Q9UEW8]

AGGTTTCGTGGTATTAAATACCTTCCACTCTTTAACTCCCAAATTTATATCTTTGATCCAGACTTTTATTTTGAATTCCA  
GACTTATATTCAGCTCCCCT

In100 candidate3157 (in intron):

LOCUS ENSG00000172292

DESCRIPTION LAG1 longevity assurance homolog 6.

[Source:Uniprot/SWISSPROT;Ac:Q6ZMG9]

TTAAAAACCTAATAACAAGTAGAATGTGCTTAGATGTGTTTCTTATAGATAACATATGGTGGGATTTTGTTTTATTTCAGTC  
CGGACACATTTGTTTTTTTTT

In100 candidate3158 (in intron):

LOCUS ENSG00000135049

DESCRIPTION ATP/GTP binding protein 1

[Source:RefSeq\_peptide;Acc:NP\_056054]EXON

ATGTCTTTTAACCTCTTTTTTCTGTTTTCCTTTTCTTTGCCTCTCTGTGCTGCCTTCAGATTATTTTCATTAGAACTATCT  
GTCAGTTTCCTAATTCTCTT

In100 candidate3159 (in intron):

LOCUS ENSG00000081479



DESCRIPTION Low-density lipoprotein receptor-related protein 2 precursor  
(Mgalin) (Glycoprotein 330) (gp330). [Source:Uniprot/SWISSPROT;Acc:P98164]  
ATTATAGAATGTTTCAAAGTGTGCACTAACCTGCCACCTTAGGTTTCTTTGTTTACTCCCCCTTAGTGTGTTTCCCAGCT  
TTAATATCTTCAAGTCTTTT

In100 candidate3160 (in intron):

LOCUS ENSG00000148584

DESCRIPTION APOBEC1 complementation factor (APOBEC1-stimulating protein).  
[source:Uniprot/SWISSPROT;Acc:Q9NQ94]  
AATAAAAGTTAAAACCATTTCTCCGCAACTCCATTGCCCCAAAATAACCACTATGTTGATATTTTATTGTCTTTCCAGAT  
TTTTCTAAACATTTTAAATC

In100 candidate3161 (in intron):

LOCUS ENSG00000154474

DESCRIPTION Kelch repeat and BTB domain-containing protein 10 (Kelch-relate  
protein 1) (Kel-like protein 23) (Sarcosin).  
[Source:Uniprot/SWISSPROT;AccO60662]  
GACTATCTCGATGACTTCTAAACAACATATAAAGTATAACTTTTTTTGGTGTACTTCTAATTTTTTTCTAACAGGCTCCA  
CAATCTCTCATATATGTTTT

In100 candidate3162 (in intron):

LOCUS ENSG00000101407

DESCRIPTION Uncharacterized protein KIAA0406.  
[Source:Uniprot/SWISSPROT;AccO43156]  
CTAACATAGCTATTCTCCTGTTTTGTGTAATCTTTTTCCATTCTTTTCTGTTACAAAAGTTTTTCCGTGGTTGCAGCT  
GTGTACCCTTTTTGTGTTTA

In100 candidate3163 (in intron):

LOCUS ENSG00000138398

DESCRIPTION Peptidyl-prolyl cis-trans isomerase G (EC 5.2.1.8) (Peptidylprlyl isomerase G) (PPIase G) (Rotamase G) (Cyclophilin G) (Clk-associating Rycyclophilin)

(CARS-cyclophilin) (CARS-Cyp) (SR-cyclophilin) (SRcyp) (SR-cy)

(CASP10). [Source:Uniprot/SWISSPROT;Acc:Q13427]

AAATAGTATATTAAGTATATACTATTCTTTTTCTTCTTACATGATTTTGGCTTCTTAAAAATCTCACATTTTAATCAGAA  
CTCTCATTTTTGTTTTCTAG

In100 candidate3164 (in intron):

LOCUS ENSG00000185532

DESCRIPTION cGMP-dependent protein kinase 1, alpha isozyme (EC 2.7.11.12) (GK 1 alpha) (cGKI-alpha). [Source:Uniprot/SWISSPROT;Acc:Q13976]

TGAAAGAAAGAATGCTATACTTTTAAAAAGAATTTTATCCTTGGTCAGGAAAAAGTCATTTTCTCTTCTTCAAAATTT  
TACTTCGATTCTTTGTTCTT

In100 candidate3165 (in intron):

LOCUS ENSG00000185532

DESCRIPTION cGMP-dependent protein kinase 1, alpha isozyme (EC 2.7.11.12) (GK 1 alpha) (cGKI-alpha). [Source:Uniprot/SWISSPROT;Acc:Q13976]

TTTCAAATAACAAAATTTTTGTTTCATTTATCTTTTGTATTTGTTGTTGTTTTTGTGTTGTTTCATTTATTTTCAGTTTCA  
TTTAATTCAGCTCTGATCTT

In100 candidate3166 (in intron):

LOCUS ENSG00000185532

DESCRIPTION cGMP-dependent protein kinase 1, alpha isozyme (EC 2.7.11.12) (GK  
1 alpha) (cGKI-alpha). [Source:Uniprot/SWISSPROT;Acc:Q13976]

TGGTTGGTTGATTTTAGGAATATTGTTAGTAACCAAGCTTTAAATTTATTTAACATTCTATTTTATCAGTCTTAAAATAC  
TCATTTTAGTCTTTTTTACCT

In100 candidate3167 (in intron):

LOCUS ENSG00000185532

DESCRIPTION cGMP-dependent protein kinase 1, alpha isozyme (EC 2.7.11.12) (GK  
1 alpha) (cGKI-alpha). [Source:Uniprot/SWISSPROT;Acc:Q13976]

AGGAACCACCTGTACAATGAAGAAAAGAAAGTTTCTGAAACTAGGAATTAACCTCACCACCTTGTATTTTGTTCAGTGA  
CTCCTGTAGTTATTTCTTC

In100 candidate3168 (in intron):

LOCUS ENSG00000120498

DESCRIPTION testis expressed sequence 11 isoform 1

[Source:RefSeq\_peptide;Ac:NP\_001003811]

TATGTCTTTCTCTTCCTCATCTTTAAGGCAATAACTATTAGCTTTGCTCTTTTGTGGCTATTTTCTAGATCCTGCAGGT  
GTGCTTCATTGTTTTTTATT

In100 candidate3169 (in intron):

LOCUS ENSG00000120498

DESCRIPTION testis expressed sequence 11 isoform 1

[Source:RefSeq\_peptide;Ac:NP\_001003811]

TGATATATAACAAGATTTATTTCTGCGTTCTCTATTCCATTCCATTGGTCTATATGTCTATCTTTATGCCAGTTCACAC  
ATTTTCATTACTATGGCTTT

In100 candidate3170 (in intron):

LOCUS ENSG00000120498

DESCRIPTION testis expressed sequence 11 isoform 1

[Source:RefSeq\_peptide;Ac:NP\_001003811]

TTAACTGTCTTCCATGTTTGTAATCGCTCTGTGCTGCATTTTGGCTATTTTATTCTTTCAGCCCACTAATTTTCTCTTCA  
CCTGTTTCTAATCTGCTATT

In100 candidate3171 (in intron):

LOCUS ENSG00000120498

DESCRIPTION testis expressed sequence 11 isoform 1

[Source:RefSeq\_peptide;Ac:NP\_001003811]

AGTTATTGAGAGAGGATATTGAAATCTTTAACTATAATTGTGGATTTGTTTCATTTCTTCTTGCAGTTCTACCAGCTTTTG  
CTTCTTATATTTTGAATTT

In100 candidate3172 (in intron):

LOCUS ENSG00000120498

DESCRIPTION testis expressed sequence 11 isoform 1

[Source:RefSeq\_peptide;Ac:NP\_001003811]

AACTTGGTATGTATTCATTCACACATGTTTCTTCCTAACCTAAGAATCACTTTCATATTACTTTGTCATACAGGTGTTT  
GCTTCGTTTTCTTCTTCCAA

In100 candidate3173 (in intron):

LOCUS ENSG00000120498

DESCRIPTION testis expressed sequence 11 isoform 1

[Source:RefSeq\_peptide;Ac:NP\_001003811]

TAACTACCGTTCTTTTTTATTCTGTGTTCTTCTCATGTACACCTCTGTGTTTTCTCAGAACTCTCTAAACTAGTAACCT  
TTCTATAATCTTCTTTTGCTT

In100 candidate3174 (in intron):

LOCUS ENSG00000120498

DESCRIPTION testis expressed sequence 11 isoform 1

[Source:RefSeq\_peptide;Ac:NP\_001003811]

ATCTTAGGGCTAAGCTTCCACCTTTGAGTATAATGTAACTGTGGAATTTTTTTTAAATGCCCTTTATCAGATTGAGGCTA  
TTCCCTTCCATTCTAGTTT

In100 candidate3175 (in intron):

LOCUS ENSG00000144357

DESCRIPTION Zinc finger protein 650. [Source:Uniprot/SWISSPROT;Acc:Q6ZT12]

EXON

AAAATGTGGTTGTAGATAACTTTAAATTGTCTTTTATTTCTCTGATATATCTATGTAACCTTCTACCTTACCAGTCTTTT  
TCCCTTAATCTGCCAGAGTT

In100 candidate3176 (in intron):

LOCUS ENSG00000144357

DESCRIPTION Zinc finger protein 650. [Source:Uniprot/SWISSPROT;Acc:Q6ZT12]

EXON

TATTTGGTAGCAAGAATATTTTCATTATTAGTCTCTAGTAACACTTGGATTTGTCATCTTTGACTATTACTCTATCAGTT  
TTGCATCTTTTATTCATTTA

In100 candidate3177 (in intron):

LOCUS ENSG00000144357

DESCRIPTION Zinc finger protein 650. [Source:Uniprot/SWISSPROT;Acc:Q6ZT12]

EXON

TGTGTGAGATAGGGTCAATGAAATTGTATTTCTTTGGCACTTAACACGAGACTGAGTTATTTCACTGTACTTTGTCAGGT  
ATCTCTGTGTTCTCCTTTGC

In100 candidate3178 (in intron):

LOCUS ENSG00000144357

DESCRIPTION Zinc finger protein 650. [Source:Uniprot/SWISSPROT;Acc:Q6ZT12]

EXON

AGGCCCTTCTGTGCTAACTCTCCTATTTATCTTGTCTATTTTCTTTTGTGAGCCTTTCACCGTGAATCCTTTTTTGTTTG  
TTTGTTTTTGTGTTTTGTTTT

In100 candidate3179 (in intron):

LOCUS ENSG00000071909

DESCRIPTION Myosin-IIIB (EC 2.7.11.1). [Source:Uniprot/SWISSPROT;Acc:Q8WXR4  
TAACTCTAGAGGTAGATTCTGTCCCATTTGCTCAGAGATGTGATATTTTGGCTTCAAACCACCACCCTATATGTTTTCTT  
TTGTCACCTTCTTTACTTTC

In100 candidate3180 (in intron):

LOCUS ENSG00000071909

DESCRIPTION Myosin-IIIB (EC 2.7.11.1). [Source:Uniprot/SWISSPROT;Acc:Q8WXR4  
GAAATTTGTTCCAAAATTCGGCACAAATTAGGAAAATAACCAAACCATACCTTTCTATTTAATCTTTGCTTCTCTCAGAT  
ACTTACTATTTTCTTGGCTT

In100 candidate3181 (in intron):

LOCUS ENSG00000196914

DESCRIPTION Rho guanine nucleotide exchange factor 12 (Leukemia-associated  
hoGEF). [Source:Uniprot/SWISSPROT;Acc:Q9NZN5]  
GTATATCTGTGAAAACTAAGAAACCAACCTTAGTACATACTGTTAATAACTTTCATACTTCATTTGGATTTTCCAGCT  
TTTTCATTAATGGCCTCTTT

In100 candidate3182 (in intron):

LOCUS ENSG00000196914

DESCRIPTION Rho guanine nucleotide exchange factor 12 (Leukemia-associated  
hoGEF). [Source:Uniprot/SWISSPROT;Acc:Q9NZN5]  
CTAGACTGTGTCCTGTCTTCCAAAGATACAATAACCATGTTTGTGAAGTTCATACCTATTTTTCCTTTTCCTTTGCAGTT  
TTATTTGCCCTCTTTCCTTC

In100 candidate3183 (in intron):

LOCUS ENSG00000150275

DESCRIPTION Protocadherin-15 precursor. [Source:Uniprot/SWISSPROT;Acc:Q96QU]  
GCTACATAATCTGCAAATAATTTCTCCCATTTCTATTGGTTGTCTGGTAACTTTGTTGATAGTTTCCTTTGCTGTGCAGAA  
GCTCTTTCATTTATTTATTT

In100 candidate3184 (in intron):

LOCUS ENSG00000150275

DESCRIPTION Protocadherin-15 precursor. [Source:Uniprot/SWISSPROT;Acc:Q96QU]  
TCTGGATTTCTGATGTATGCATGTCAACATCTCTAACAAAATTGAGAATATTTTCTTGAAATTTTTCCTCAGGTATGTTT  
TCCAAGTTGGTTATTTTTTC

In100 candidate3185 (in intron):

LOCUS ENSG00000150275

DESCRIPTION Protocadherin-15 precursor. [Source:Uniprot/SWISSPROT;Acc:Q96QU]  
GGTTTGTCTTTTTCAATGTTTTGCCTTCCAAAGTAACAAAATGGTGTGCTTTTTATACTTCATTTTTTTTTGGCTTCAGTT  
TTACTTTGGTCTCGTTACTG

In100 candidate3186 (in intron):

LOCUS ENSG00000150275

DESCRIPTION Protocadherin-15 precursor. [Source:Uniprot/SWISSPROT;Acc:Q96QU]  
TCAAATAACTAAGATAATTCCTAAATTCATTTATCTTTTATATGGTCTTTGCATCTCAATTTTCCTTCAGTTGAGCTCTGA  
TTTTGGTTATTTCTTGTCTT



In100 candidate3187 (in intron):

LOCUS ENSG00000150275

DESCRIPTION Protocadherin-15 precursor. [Source:Uniprot/SWISSPROT;Acc:Q96QU]

AGTAGTTACATACTCTCTCATTCCTAACTTCCATTCCCTCTCCCTATTAATTTATATTCAGCCCATTTTATTCAATTTGGT  
TATGTTCCCTACCTTCTCTGT

In100 candidate3188 (in intron):

LOCUS ENSG00000150275

DESCRIPTION Protocadherin-15 precursor. [Source:Uniprot/SWISSPROT;Acc:Q96QU]

AGCAAAGAAAGATTGAGCGGTTAATCTTAACTTGTATTATAATCTGTTTTTCTCCCCTCAAATATCATTCAGTTCAGTTT  
ATTTTAAAGATCTTTTGCTT

In100 candidate3189 (in intron):

LOCUS ENSG00000109944

DESCRIPTION CDNA: FLJ23554 fis, clone LNG09359.

[Source:Uniprot/SPTREMBL;Ac:Q9H5D6]

AATAGCTGTGTGTTAGATTGTCTATTCTAGACTTCGTGCCTTTTTAACTGTTTTTATTTTACACCTTTTATTTCTCAGTG  
CTTCTTTCTGAATAATTTCT

In100 candidate3190 (in intron):

LOCUS ENSG00000151151

DESCRIPTION Inositol polyphosphate multikinase (EC 2.7.1.151) (Inositol

1,34,6- tetrakisphosphate 5-kinase). [Source:Uniprot/SWISSPROT;Acc:Q8NFU5]

GAAAGTGAGCCAAAGCTCTATTAAGTGTCTTTTTTTCCTTCCTCCCTTAATTCCTTCCTCTTTTTTGTGGGCTTACAGGT  
CTTTTGTAGTCCTAACTATAT

In100 candidate3191 (in intron):

LOCUS ENSG00000151151

DESCRIPTION Inositol polyphosphate multikinase (EC 2.7.1.151) (Inositol 1,3,4,6- tetrakisphosphate 5-kinase). [Source:Uniprot/SWISSPROT;Acc:Q8NFU5]

TTTATTCTTTAAATGCTGAGGTATTCCTCTTGGTTCCATTTTAACATCTGCCTTCCTTTTCTATTTCTTCTTAAGCAGGG  
CTCTCTATTCTCATTTTAGT

In100 candidate3192 (in intron):

LOCUS ENSG00000123600

DESCRIPTION methyltransferase like 8 [Source:RefSeq\_peptide;Acc:NP\_079046]

EXON

AATCCTACAAACAAAGGATTTCACTACTGTTAACATTTTAGTGACCTTTTTCTTCTTTTTTTTTTTTTTTGAGACAGAC  
TTTTGTTCTTGTTGCCCGGG

In100 candidate3193 (in intron):

LOCUS ENSG00000115827

DESCRIPTION CDNA FLJ13096 fis, clone NT2RP3002166.

[Source:Uniprot/SPTREMBLAcc:Q9H908]

AATTTTGTAGGGAGCATATATAAAATAACTATGTCTTCATTCTTTTCTATTCACTTTTTGGCCTAAGCAGATACTAGATTA  
ATTTCAGCCTCTCTTTACTT

In100 candidate3194 (in intron):

LOCUS ENSG00000071967

DESCRIPTION cytochrome b reductase 1 [Source:RefSeq\_peptide;Acc:NP\_079119]

EXON

TTTAAATAATTTAAAATTAGTTTAGAACTTAAAATTAAATGATAACCTTTGCACTTTTGGTGTTTAGCTTCTTTCAGGT  
TTTTCAGTCTTTCTGCTTCC

In100 candidate3195 (in intron):

LOCUS ENSG00000072401

DESCRIPTION Ubiquitin-conjugating enzyme E2 D1 (EC 6.3.2.19) (Ubiquitinproein  
ligase D1) (Ubiquitin carrier protein D1) (UbcH5) (Ubiquitin- conjugatig  
enzyme E2-17 kDa 1) (E2(17)KB 1). [Source:Uniprot/SWISSPROT;Acc:P51668]

GATTGTCTAGAGAAAACCAAGTGGACCTAACAAATGGTCTGGGTTCATTTTTCTTCTCTTCTTAAACCAGGAAATCTC  
TGGCTTGTGTTTTTGCTTCT

In100 candidate3196 (in intron):

LOCUS ENSG00000115840

DESCRIPTION Calcium-binding mitochondrial carrier protein Aralar1  
(Mitochonrial aspartate glutamate carrier 1) (Solute carrier family 25 member  
12). [ource:Uniprot/SWISSPROT;Acc:O75746]

AGCCTCTTTTGCACTATTCCATTGAAGACATAACTCAATAGTGAATAAATTCTCTCCAGATTTTCTACATTTTTTGGAGT  
TTTTGATAATTGTACCCTTC

In100 candidate3197 (in intron):

LOCUS ENSG00000128708

DESCRIPTION Histone acetyltransferase type B catalytic subunit (EC 2.3.1.48.

[Source:Uniprot/SWISSPROT;Acc:O14929]

TCTTTAAAAAATCTGAATGCCTAGTCTCTTCCCTAACAAATTATGTTGTTTTTCCCAAGTTTCTTGTCTTCTCAGTTGTT  
ATATATATATATTCTCTTTT

In100 candidate3198 (in intron):

LOCUS ENSG00000122870

DESCRIPTION Protein bicaudal C homolog 1 (Bic-C).

[Source:Uniprot/SWISSPROTAcc:Q9H694]

ACCCAAGAATTCTACCACTCAAATAACAAGTGTTATTAATATTTTGGTATTTATCCTTTCAGTCTTTTTTCTAACACATT  
CACTATGTATCCATATATCT

In100 candidate3199 (in intron):

LOCUS ENSG00000122870

DESCRIPTION Protein bicaudal C homolog 1 (Bic-C).

[Source:Uniprot/SWISSPROTAcc:Q9H694]

AGTGTTCCAATCCTAACCTTTGTTTTATTATTTCCCTATCCTGATTTTCCTTATGAGATTCTCTCAGTTCTTTATTTTAT  
GTTTTTGTTCCTTTTGTGCT

In100 candidate3200 (in intron):

LOCUS ENSG00000122870

DESCRIPTION Protein bicaudal C homolog 1 (Bic-C).

[Source:Uniprot/SWISSPROTAcc:Q9H694]

AACTCTTCACATGTTTTTAACACATAAATTTCTATTGTTTATATTTTCAGGGTTCTTTTTTATGTACTACACAGATTTAAT  
AGCTGGTTTTTTTTTTCCCT

In100 candidate3201 (in intron):

LOCUS ENSG00000122870

DESCRIPTION Protein bicaudal C homolog 1 (Bic-C).

[Source:Uniprot/SWISSPROT;Acc:Q9H694]

AGAGAGCCACCCTGCCATCCAACGGAGCCTGGACTTGTAATAACTTTCCATACCTTTATTTTGTCCCAGGGATCCTTTTT  
ACAGCTCCTCATTTAATTCA

In100 candidate3202 (in intron):

LOCUS ENSG00000152256

DESCRIPTION [Pyruvate dehydrogenase [lipoamide]] kinase isozyme 1,  
mitochondrial precursor (EC 2.7.11.2) (Pyruvate dehydrogenase kinase isoform 1).

[Source:Uniprot/SWISSPROT;Acc:Q15118]

TTAAAAGTATATTTTGTTTGAAGTTAGTGTAACCATCCCAACTCTTTTGTCTGTTTTCATAGTGTAACCTTCCAGAC  
TTTGTAGTTTAAACCTCTTTG

In100 candidate3203 (in intron):

LOCUS ENSG00000151150

DESCRIPTION Ankyrin-3 (ANK-3) (Ankyrin-G).

[Source:Uniprot/SWISSPROT;Acc:Q1955]

TTACCTTTCTGAGAACATTTGAGATAACTTTTCTTTTAATTTAGTTTTTCTGTTTCCCAAATGTCCCTAATTCCTCAGAT  
TTCCTTTTTTTCCTTTTTTT

In100 candidate3204 (in intron):

LOCUS ENSG00000151150

DESCRIPTION Ankyrin-3 (ANK-3) (Ankyrin-G).

[Source:Uniprot/SWISSPROT;Acc:Q1955]

AAAAGGTGCCAAGACTATAACAAAATTCTCATTTTCCTAATTGTCCTCCATTCTTCTCACTTTTTGAATTCTGGACAGCC  
GGAATTATTCCTTTTCTGTC

In100 candidate3205 (in intron):

LOCUS ENSG00000091436

DESCRIPTION Mitogen-activated protein kinase kinase kinase MLT (EC 2.7.11.2)  
(MLK-like mitogen-activated protein triple kinase) (Leucine zipper- and sterile  
alpha motif-containing kinase) (Sterile alpha motif- and leucine zipper-containing  
kinase AZK) (Mixed lineage [Source:Uniprot/SWISSPROT;Acc:Q9NYL]

TTTAATTTTGTAACTTGTTACATTCTTTCCTTCACTTGTAATACCTTTGTCTTCCCTGTCTGGGCAGATCCTACCCA  
TTCTTCAGCTGTAATTATTT

In100 candidate3206 (in intron):

LOCUS ENSG00000148082

DESCRIPTION SHC-transforming protein 3 (SH2 domain protein C3) (Src homolog 2  
domain-containing-transforming protein C3) (Neuronal Shc) (N-Shc) (Protein RAI).  
[Source:Uniprot/SWISSPROT;Acc:Q92529]

CTTATAGTTTTTTTCTTATATAAGGAATGGAGGCTAACTCTACTTTATTTCTTTTGTCTTTGGTTTTATTTTCAGGC  
TGATGTTCTGTTTCATTTTT

In100 candidate3207 (in intron):

LOCUS ENSG00000172845

DESCRIPTION Transcription factor Sp3 (SPR-2).

[Source:Uniprot/SWISSPROT;AccQ02447]

AGTAGTCTAACATCAAACATTTTCAAACCTTTTTTTTTTTTTTTGGTCTCAGATGATTTTCTAATTTATTCCTCTCCCATT  
TGGTATTTAGTGTACTTTAT

In100 candidate3208 (in intron):

LOCUS ENSG00000138430

DESCRIPTION Putative GTP-binding protein 9.

[Source:Uniprot/SWISSPROT;Acc:QNTK5]

AGTTTTTTCATTCAAGTGCCAATAACTGCTTGAGGCGTTCTTTCATTCATTGATTCCTTCTTCAGTCATGTCTTCACTTGT  
ATTTTTTGCTCACCCCTTTTT

In100 candidate3209 (in intron):

LOCUS ENSG00000138430

DESCRIPTION Putative GTP-binding protein 9.

[Source:Uniprot/SWISSPROT;Acc:QNTK5]

TCATAGGAATGTATGCTATGATTATCTGAGAAGGAAAATTAATAATAGTAACTGCTGTTAATTCTTTACTATTTGCAGGC  
TTTTCTAGGTTCCCTTACAAT

In100 candidate3210 (in intron):

LOCUS ENSG00000187764

DESCRIPTION Semaphorin-4D precursor (Leukocyte activation antigen CD100)

(B18) (A8) (GR3). [Source:Uniprot/SWISSPROT;Acc:Q92854]

AGTTGTCTGTTCCCCTTTTTTTCATCTCTGCTACGTGTGTAACCTCTAGGAAACCTCTTTAGTTTACTTTCCAGCCTTTC

ATTCTTTTCAACCACATTTTA

In100 candidate3211 (in intron):

LOCUS ENSG00000124177

DESCRIPTION Chromodomain-helicase-DNA-binding protein 6 (EC 3.6.1.-)  
(ATPependent

helicase CHD6) (CHD-6) (Radiation-induced gene B protein).

[SourceUniprot/SWISSPROT;Acc:Q8TD26]

TTATAACGAAGTTGTCCTTTGTCTCCCATTTATTTATATCAGTATTGACTTGTGGATTTTGTTTTATTTTATAATCCATT  
ACTCTATTTATTTTGTTTTC

In100 candidate3212 (in intron):

LOCUS ENSG00000150347

DESCRIPTION AT-rich interactive domain-containing protein 5B (ARID  
domainontaining

protein 5B) (Mrf1-like) (Modulator recognition factor 2) (MRF-  
2).[Source:Uniprot/SWISSPROT;Acc:Q14865]

CACTTTAACATATTAAGGCATCTTTTTCTTTCATTTGCGCACAAATGCTGATTTTGCAGTCCTATTTTACGCCTTAATGT  
GACAACTTCCTGGTTTTTTT

In100 candidate3213 (in intron):

LOCUS ENSG00000138311

DESCRIPTION Protein ZNF365. [Source:Uniprot/SWISSPROT;Acc:Q70YC5]



CCCCAAAGCGGTTTATTTATAACATTTTCATTACTTATTGAACTTTATTTATGCTTACCTCCTTCCTAGCAGATTTAAAA  
ATAGTTTTGTTTTTTTTTTTT

In100 candidate3214 (in intron):

LOCUS ENSG00000138311

DESCRIPTION Protein ZNF365. [Source:Uniprot/SWISSPROT;Acc:Q70YC5]

CTTTTAATTTTATAATTTTCATTAACATGGAAGAGTTTAACTCTTATATACCTTCATCAGTTTCTTTCATAAACTTGG  
ATTGTTTCATGCATTTTTTTTT

In100 candidate3215 (in intron):

LOCUS ENSG00000196090

DESCRIPTION Receptor-type tyrosine-protein phosphatase T precursor (EC  
3.1..48) (R-PTP-T) (RPTP-rho). [Source:Uniprot/SWISSPROT;Acc:O14522]

AGTGGGCAAGTGCATTTTACAAGTATAACAAACTTCCTTTTCTTCTTATTTGGACAGGTCCTACCAAATTCTCAATGAC  
TTTCTTTTAATCTTTTTTTTT

In100 candidate3216 (in intron):

LOCUS ENSG00000196090

DESCRIPTION Receptor-type tyrosine-protein phosphatase T precursor (EC  
3.1..48) (R-PTP-T) (RPTP-rho). [Source:Uniprot/SWISSPROT;Acc:O14522]

CTGTGTGATTGGTCTTATAACAACCTTATGATGAGATGTTACATAACTAATTTTATTTTATTTTCTTCTTTCTTTCAGCC  
TTTATTTTTTTATTTTTATTT

In100 candidate3217 (in intron):

LOCUS ENSG00000196090

DESCRIPTION Receptor-type tyrosine-protein phosphatase T precursor (EC  
3.1..48) (R-PTP-T) (RPTP-rho). [Source:Uniprot/SWISSPROT;Acc:O14522]

CATTAACCTGACCTATCTACTTTTATTTTAACTGCCTCTATATACTCTTCCTTGGTAATGGCCTGTTTTCTTTTCAGCT  
TGTTAAGTCTACTTGTTTCT

In100 candidate3218 (in intron):

LOCUS ENSG00000196090

DESCRIPTION Receptor-type tyrosine-protein phosphatase T precursor (EC  
3.1..48) (R-PTP-T) (RPTP-rho). [Source:Uniprot/SWISSPROT;Acc:O14522]

CCTTGTATTCTCGATGCTAACGATTTGTGTCTTCTTTCTTTTCTTTCTCGATCAGTCTGGCTAGAGACTTGTCAGTTTTA  
TTGATCTTTTCTTTTTTCTT

In100 candidate3219 (in intron):

LOCUS ENSG00000165025

DESCRIPTION Tyrosine-protein kinase SYK (EC 2.7.10.2) (Spleen tyrosine  
kinase). [Source:Uniprot/SWISSPROT;Acc:P43405]

ATAACTTTAAACATGTGTTTTACTCCTTTATTTTAATTCTCTATTTTCAGGGACATTAATTTTATATATTTTAGATCACCC  
CTGTCTTTCTCAATTTTCT

In100 candidate3220 (in intron):

LOCUS ENSG00000128656

DESCRIPTION N-chimaerin (NC) (N-chimerin) (Alpha chimerin) (A-chimaerin) (Ro  
GTPase-activating protein 2). [Source:Uniprot/SWISSPROT;Acc:P15882]

TTTTAAAAAACTAACTCATAGTTGGTTTTTTTTTCCTCTGTTGTTTTTCTAGTGTCTATTTTGTTTATTTTCAGCTCTAATC  
ACTGCTATTACCTTCCTTTT

In100 candidate3221 (in intron):

LOCUS ENSG00000115966

DESCRIPTION Cyclic AMP-dependent transcription factor ATF-2 (Activating  
transcription factor 2) (cAMP response element-binding protein CRE- BP1) (HB16)  
[Source:Uniprot/SWISSPROT;Acc:P15336]

TATGTCTATATTAAATAACTGCCTATTACCTCAATATATTTGTAGGTTTTTTTCTTTTCTTTTTTAGAATTTTCAGGG  
ATTGCTCTTCCCTATTTTT

In100 candidate3222 (in intron):

LOCUS ENSG00000148090

DESCRIPTION Methylglutaconyl-CoA hydratase, mitochondrial precursor (EC  
4.21.18) (AU-specific RNA-binding enoyl-CoA hydratase) (AU-binding protein/enol-  
CoA hydratase). [Source:Uniprot/SWISSPROT;Acc:Q13825]

TACTGTAACTTAATGTGTTTTAGTGTTAATGGATGTCCTTTTTTCTCTTTTGCTATCCCAGCCCCTTCCTTGCCTAATTG  
TTACTCTCTTCTGTGTGGTT

In100 candidate3223 (in intron):

LOCUS ENSG00000183230

DESCRIPTION Catenin alpha-3 (Alpha T-catenin) (Cadherin-associated protein)  
[Source:Uniprot/SWISSPROT;Acc:Q9UI47]

ATTCGTTTCATGTCATTGCATGTATACTTGGTTCATTCTTTCTTCTTGCATAACATGTGATGGTATTCTTGTGCCACAGAT  
TGTTTATCCATTCACTTGTA

In100 candidate3224 (in intron):

LOCUS ENSG00000183230

DESCRIPTION Catenin alpha-3 (Alpha T-catenin) (Cadherin-associated protein)

[Source:Uniprot/SWISSPROT;Acc:Q9UI47]

AATTTTTTAAATTTTATCAAATTATTATGTGCTTAACCCCTCTTCACTTCCCAATTATTTTCCAGAGACAACCTATTTTAA  
AATTCTTGGCTCTTTCTTCT

In100 candidate3225 (in intron):

LOCUS ENSG00000183230

DESCRIPTION Catenin alpha-3 (Alpha T-catenin) (Cadherin-associated protein)

[Source:Uniprot/SWISSPROT;Acc:Q9UI47]

CTGGCATGAAGATTTTCTTTGAGATGGAATCTGAGTAACAATTATAATTTTGTATTCTTTTTCTTTTTCTTGAGACAGAG  
TCTTGCTCTGTCGCTCTGTT

In100 candidate3226 (in intron):

LOCUS ENSG00000183230

DESCRIPTION Catenin alpha-3 (Alpha T-catenin) (Cadherin-associated protein)

[Source:Uniprot/SWISSPROT;Acc:Q9UI47]

CACAATAAATTCCATTCTCTTCACATAACCATCAAGTGACTTTGGGTCCTTTTATTCTTTTTCTTTTTTTCACAGTAACCT  
CTCTCTATTTCTCCATTTTT

In100 candidate3227 (in intron):

LOCUS ENSG00000183230

DESCRIPTION Catenin alpha-3 (Alpha T-catenin) (Cadherin-associated protein)  
[Source:Uniprot/SWISSPROT;Acc:Q9UI47]  
TCCTGTCAATACTCCATTCTAAAAATGGATTGTAACCTTCTACTTAGTTCCTCACCTCTGTTAGTGTCTTAGTTCAGGT  
TTTCATCATTTTTTCACAGCT

In100 candidate3228 (in intron):

LOCUS ENSG00000183230

DESCRIPTION Catenin alpha-3 (Alpha T-catenin) (Cadherin-associated protein)  
[Source:Uniprot/SWISSPROT;Acc:Q9UI47]  
CTCTTTTAATCATTTGAACATGGGATAACTCTACTTGTGTCTTCTTCAATTTCTTTTATCAATGTATCAGAGTTTTCAATC  
CACAGGTCTTTTACCTCGTT

In100 candidate3229 (in intron):

LOCUS ENSG00000183230

DESCRIPTION Catenin alpha-3 (Alpha T-catenin) (Cadherin-associated protein)  
[Source:Uniprot/SWISSPROT;Acc:Q9UI47]  
GTCTACTTAAAGATTTGTCCATTTTGATTAACCTCCAAAAAGCCACTTTTGTTGATTTTTTTTTCTATCATTTTCTCAGTC  
ACTATTTCATTTATTTCTGC

In100 candidate3230 (in intron):

LOCUS ENSG00000183230

DESCRIPTION Catenin alpha-3 (Alpha T-catenin) (Cadherin-associated protein)  
[Source:Uniprot/SWISSPROT;Acc:Q9UI47]  
TTATTCTAAATTTAAAATGCCATGATAACTGGTAAAGAAAATTTTCATAACTATTGTTTCTTTTTTTCTTCCAGAATAC  
ACTGTTTATTCTTAACCTTT

In100 candidate3231 (in intron):

LOCUS ENSG00000183230

DESCRIPTION Catenin alpha-3 (Alpha T-catenin) (Cadherin-associated protein)

[Source:Uniprot/SWISSPROT;Acc:Q9UI47]

CAAGTAGTAACCATGTTGATACTGTGTCTTTAGACTGGCTCTCCTTTCTTTCCTGATTCGTTCTTCCCAGGCTCCCAGTT  
CCGTTTACTAATATCTATTT

In100 candidate3232 (in intron):

LOCUS ENSG00000183230

DESCRIPTION Catenin alpha-3 (Alpha T-catenin) (Cadherin-associated protein)

[Source:Uniprot/SWISSPROT;Acc:Q9UI47]

TTATCTAAATCTCATCAATTATCCTTTCCTTCATTTTAACCTCATTTTACAAATTACTTGCTTCTTCCATCTCTCAGTC  
ATTTCTTTTTTCTTTACATTT

In100 candidate3233 (in intron):

LOCUS ENSG00000183230

DESCRIPTION Catenin alpha-3 (Alpha T-catenin) (Cadherin-associated protein)

[Source:Uniprot/SWISSPROT;Acc:Q9UI47]

ACCTAGATTTAACTAAATATCTTCTATTTTCATAATTTTTCATCTGCAGTCATTGCCTTTTGACTCCCCATAAATTTATA  
CCAATGTTTTTCAGTTCCTT

In100 candidate3234 (in intron):

LOCUS ENSG00000183230

DESCRIPTION Catenin alpha-3 (Alpha T-catenin) (Cadherin-associated protein)

[Source:Uniprot/SWISSPROT;Acc:Q9UI47]

TACACTAAGCAATTTTTTAACTATTTTTTTTGGCCATTTCTTTTATTTAAATTTGATTTCTCCTTGACTTTTATCAGTT  
ACTTCCTTTTGATCCTTTTC

In100 candidate3235 (in intron):

LOCUS ENSG00000183230

DESCRIPTION Catenin alpha-3 (Alpha T-catenin) (Cadherin-associated protein)

[Source:Uniprot/SWISSPROT;Acc:Q9UI47]

CTCCCATTCGGTGGGTTTTCTATTAACCTCTGCTGATTATTTCTTTTTCTGTGCAGAAGCTTTCATTTTAATTAAGTACC  
ATCTATTTATCCTTGTTTTT

In100 candidate3236 (in intron):

LOCUS ENSG00000183230

DESCRIPTION Catenin alpha-3 (Alpha T-catenin) (Cadherin-associated protein)

[Source:Uniprot/SWISSPROT;Acc:Q9UI47]

TGCAATGTCACTTTTATAACTTCTGACTGTGCTTATTTGAATCCTCTCTCTTTTTTTCTTTGTTAATCTAGCTAGCAGTC  
TACCGATCCTGTTTATTTTT

In100 candidate3237 (in intron):

LOCUS ENSG00000169071

DESCRIPTION Tyrosine-protein kinase transmembrane receptor ROR2 precursor (C  
2.7.10.1) (Neurotrophic tyrosine kinase, receptor-related 2).

[Source:Unirot/SWISSPROT;Acc:Q01974]

TAGATCTTGTATCTATTAGGAGACACTGAAGTCCCTGATAACAACCTGAGGATTTTTCCATTTCTCTTTTCAGATCGTTCA  
GTTTTGGCTTCATGTTGTTT

In100 candidate3238 (in intron):

LOCUS ENSG00000169071

DESCRIPTION Tyrosine-protein kinase transmembrane receptor ROR2 precursor (C  
2.7.10.1) (Neurotrophic tyrosine kinase, receptor-related 2).

[Source:Unirot/SWISSPROT;Acc:Q01974]

AACCCATTTATAATTATTATGATAACTCATATGTGTTATCTATTTATTCAGTCTTATTTTATGTTTTCTGTTTATGTTGC  
TTTATTTTAAAATTTTCTTT

In100 candidate3239 (in intron):

LOCUS ENSG00000198739

DESCRIPTION Leucine-rich repeat transmembrane neuronal protein 3  
precursor.[Source:Uniprot/SWISSPROT;Acc:Q86VH5]

TAATGATAATTAATAACTTTATTAACAATTCTCCATGTTTTCTTTTTATTTTAAAGGGCTCTCACTTCTCCCAATCAGGA  
TTCTCATTTATCCTTTCTCT

In100 candidate3240 (in intron):

LOCUS ENSG00000090054



DESCRIPTION Serine palmitoyltransferase 1 (EC 2.3.1.50) (Long chain base  
bisynthesis protein 1) (LCB 1) (Serine-palmitoyl-CoA transferase 1) (SPT 1)  
(PT1). [Source:Uniprot/SWISSPROT;Acc:O15269]

ATGCAAGATCATAACTCACTCTGCCTATTCTTGCCTTTGATCTTATTTTATATTTTCTTCCTGTTTGGCTTATTCCAGAT  
TTTTCTGAGATACTTTATTT

In100 candidate3241 (in intron):

LOCUS ENSG00000150455

DESCRIPTION Toll-interleukin 1 receptor domain-containing adapter protein (IR  
domain-containing adapter protein) (MyD88 adapter-like protein) (Adaptorprotein  
Wyatt). [Source:Uniprot/SWISSPROT;Acc:P58753]

CTGGATATATATTTTTAAACATTTTAACCCTCGGGAGATTGCCTTTTCACTCTCCTATTTATGTCTTTTGATGAACAGAA  
GTTCTTCATTCTAATGTTTT

In100 candidate3242 (in intron):

LOCUS ENSG00000108176

DESCRIPTION DnaJ homolog subfamily C member 12 (J domain-containing  
protein1). [Source:Uniprot/SWISSPROT;Acc:Q9UKB3]

TACTTCTCAAGTTGCTCATGAATTGCTGAGTTTAAACCATTGTAAATTCACATTCTCCATCTTTTTAGTTTATGTCAGCT  
TGCTCTCTTTTCAAGGCTTA

In100 candidate3243 (in intron):

LOCUS ENSG00000116044

DESCRIPTION Nuclear factor erythroid 2-related factor 2 (NF-E2-related factor  
2) (NFE2-related factor 2) (Nuclear factor, erythroid derived 2, like 2) HEBP1).  
[Source:Uniprot/SWISSPROT;Acc:Q16236]

AGCTAACACATATTTACTTATCATCCTTTTCTTTCTAGCTGATTACAGGTTTCCTCTTTTCTTTTTGTCTTCCTGGTAT  
CCTTGTCTGTTCCCTCTGTT

In100 candidate3244 (in intron):

LOCUS ENSG00000116044

DESCRIPTION Nuclear factor erythroid 2-related factor 2 (NF-E2-related factor  
2) (NFE2-related factor 2) (Nuclear factor, erythroid derived 2, like 2) HEBP1).  
[Source:Uniprot/SWISSPROT;Acc:Q16236]

TGTCGTAATTTTAATAAGTAACTTGAATTGTTAACAATTTACTCTTGTCTTTTCTTGGACTCAGAAATGTTATTTTATT  
ATTATGTCTCTGCATCTTTC

In100 candidate3245 (in intron):

LOCUS ENSG00000018510

DESCRIPTION Alkyldihydroxyacetonephosphate synthase, peroxisomal precursor EC  
2.5.1.26) (Alkyl-DHAP synthase) (Alkylglycerone-phosphate synthase)  
(Agigassociated  
gene 5 protein). [Source:Uniprot/SWISSPROT;Acc:O00116]

TTGTATTCTCCTTTGGGTAGTTTATAACATAGCCTTTACTTTTTACGTGCCTTTTTTTGGTTCTGTTTCTTTCCTCAGGT  
TAGTCAGCTCTTGTTTCATT

In100 candidate3246 (in intron):

LOCUS ENSG00000018510

DESCRIPTION Alkyldihydroxyacetonephosphate synthase, peroxisomal precursor EC 2.5.1.26) (Alkyl-DHAP synthase) (Alkylglycerone-phosphate synthase)

(Agigassociated

gene 5 protein). [Source:Uniprot/SWISSPROT;Acc:000116]

CTTGATCTTCTGAAAAACATAGACTAACCTATTAATATAAACTTTTTTCTCTTCTTAGGTCATGCTCTTAAACCTCAGGT  
TTCCTCTATTTTTACATCAT

In100 candidate3247 (in intron):

LOCUS ENSG00000128655

DESCRIPTION Dual 3',5'-cyclic-AMP and -GMP phosphodiesterase 11A (EC 3.1.4.7) (EC 3.1.4.35) (cAMP and cGMP phosphodiesterase 11A).

[Source:Uniprot/SWISPROT;Acc:Q9HCR9]

CATGGAAGTTCATTCTTTTTTCCACTAACTTCCATAGTAATTTATCTGTATGACTCTTGCTATTTATTCCAGTTTTGGTT  
GCTTTAATTTTGGCTCACCT

In100 candidate3248 (in intron):

LOCUS ENSG00000128655

DESCRIPTION Dual 3',5'-cyclic-AMP and -GMP phosphodiesterase 11A (EC 3.1.4.7) (EC 3.1.4.35) (cAMP and cGMP phosphodiesterase 11A).

[Source:Uniprot/SWISPROT;Acc:Q9HCR9]

ATTTTTTATGAATTGGATTATTTTGTAACCATCCATTATTTTTATCTTAATTTTATTACAGAATTACCCTCTCTTTTCCC  
CAAAGTGCTATTTTCTTATT

In100 candidate3249 (in intron):

LOCUS ENSG00000128655

DESCRIPTION Dual 3',5'-cyclic-AMP and -GMP phosphodiesterase 11A (EC 3.1.4.7)

(EC 3.1.4.35) (cAMP and cGMP phosphodiesterase 11A).

[Source:Uniprot/SWISPROT;Acc:Q9HCR9]

CAATAGGCCCTTCTTTAAAAAATATTTCTCTAACTTCCTGGATGTTGATTTTTTAAATTCCTTTCAGAATGTTTTCTG  
CTGGGGTCTATTCCACTTTC

In100 candidate3250 (in intron):

LOCUS ENSG00000108187

DESCRIPTION Probable isomerase MAWBP (EC 5.1.-.-) (MAWD-binding protein)

(Unknown protein 32 from 2D-page of liver tissue).

[Source:Uniprot/SWISSPROT;Ac:P30039]

TTATGGTAACTTGATATTTTCATCCTTTTTTTTTTTTCACTCTCCATCAGTGGAGTCCCAACTAGATATTTTCTTGTGTTTC  
CATTGCTATTTCTCCTTCTC

In100 candidate3251 (in intron):

LOCUS ENSG00000170322

DESCRIPTION Nuclear factor related to kappa-B-binding protein (DNA-binding

rotein R kappa-B). [Source:Uniprot/SWISSPROT;Acc:Q6P4R8]

TAACACGGTTGTGACCTTTTCCTCTCTGTCAGCTTCCTTGTAACAGCTGTGGGAAACCTTTTCCACTCTACATTTCCAGT  
CTTTTGTGCTCCCTTTTGTT

In100 candidate3252 (in intron):

LOCUS ENSG00000155657

DESCRIPTION Titin (EC 2.7.11.1) (Connectin) (Rhabdomyosarcoma antigen MU-RM-40.14). [Source:Uniprot/SWISSPROT;Acc:Q8WZ42]

ACCTTTTGCTCATTAGTAACAAAGATAGAGATTTTTTTTCTACAGCCTTCAAAGGTATCTATTTTAGACTTTTCATATCT  
TGATCTTCTCAGCTCTCTTT

In100 candidate3253 (in intron):

LOCUS ENSG00000155657

DESCRIPTION Titin (EC 2.7.11.1) (Connectin) (Rhabdomyosarcoma antigen MU-RM-40.14). [Source:Uniprot/SWISSPROT;Acc:Q8WZ42]

TGTCTTATTGTCTCTTAAATCATTTGCATTCTTCTAACATGTAGCATAGTTTCTTTGATATTCATTAATTCCAGTTGCTA  
ACTGTGAGCCTTTCTTCCTT

In100 candidate3254 (in intron):

LOCUS ENSG00000155657

DESCRIPTION Titin (EC 2.7.11.1) (Connectin) (Rhabdomyosarcoma antigen MU-RM-40.14). [Source:Uniprot/SWISSPROT;Acc:Q8WZ42]

AGTAAAGTAGTTTTTTTACCAATCATGTATAAATAGAATGTAAATCTAACAAGATAGGAAGTAGTCTTTCTATTCCCAGTT  
AGTTGTTTGCTTTCTCTGTT

In100 candidate3255 (in intron):

LOCUS ENSG00000155657

DESCRIPTION Titin (EC 2.7.11.1) (Connectin) (Rhabdomyosarcoma antigen MU-RM-40.14). [Source:Uniprot/SWISSPROT;Acc:Q8WZ42]

TAATGTAAATAAAAATAGGTCACAAAATTAACCCTGTGGTCTTTCTAAGGTTTCTAAACCTCCTTTTCTCAGGTTTCTAA  
ACCTCCTTTTCTCAGAGGTT

In100 candidate3256 (in intron):

LOCUS ENSG00000138346

DESCRIPTION DNA2-like helicase (EC 3.6.1.-) (DNA replication ATP-dependent  
elicase-like homolog). [Source:Uniprot/SWISSPROT;Acc:P51530]

TGTGAGCCACTACACTTGGCCTCAAATGTTTTTTTATGTAAACGTAACCTGTTTTAGTTTCATTTTTTCTTTCCAGAA  
TGAATTTTTTTTTTTTTTTTTT

In100 candidate3257 (in intron):

LOCUS ENSG00000188312

DESCRIPTION Centromere protein P (CENP-P).  
[Source:Uniprot/SWISSPROT;Acc:Q6PU0]

TTCCACTTAACATAAAAAATTGACCTCATCTTTCTTTAGCAGTTATGAGTACATTATTATTACAATGTTTTTAAGTTGAT  
TTCTCTTCCTTTCTTTTCCC

In100 candidate3258 (in intron):

LOCUS ENSG00000138336

DESCRIPTION CXXC-type zinc finger protein 6 (Leukemia-associated protein with  
a CXXC domain). [Source:Uniprot/SWISSPROT;Acc:Q8NFU7]

TGGTTCCATAATAATGATAACTACCACTTATTTTCTCTCTCTCTTTTTTTTTTTGTATTTTAGAGTTGCAAACAGGC  
TTTTTTTTTTTTAGCTCCTAT

In100 candidate3259 (in intron):

LOCUS ENSG00000204580

DESCRIPTION Epithelial discoidin domain-containing receptor 1 precursor  
(EC2.7.10.1) (Epithelial discoidin domain receptor 1) (Tyrosine kinase DDR)  
(Discoidin receptor tyrosine kinase) (Tyrosine-protein kinase CAK) (Cell adhesion  
kinase) (TRK E) (Protein-tyrosine kinase) [Source:Uniprot/SWISSPROT;Acc:Q0834]  
TAACATGAATGCTAGATCTTTTGTTACAGTCACATAGTTATGTTTCATTGTGGTCTGAGGTTACGTTTCATTTTTTTCCTAT  
CTATTTTCTCCCTGTTGTTTC

In100 candidate3260 (in intron):

LOCUS ENSG00000196323

DESCRIPTION Zinc finger and BTB domain-containing protein 44 (BTB/POZ  
domain-containing  
protein 15). [Source:Uniprot/SWISSPROT;Acc:Q8NCP5]  
TTTCTGAAGTAACTCCTACTATGCTGGTTATTCTGTGTATCTATCTCTTTCACAGGTTCCCTTCTGATACCCCGCCTTC  
ACTTTTTTCCTCTTTTTTTT

In100 candidate3261 (in intron):

LOCUS ENSG00000196323

DESCRIPTION Zinc finger and BTB domain-containing protein 44 (BTB/POZ  
domain-containing  
protein 15). [Source:Uniprot/SWISSPROT;Acc:Q8NCP5]  
GTCTGCAAGGAAACCTAACTTCTGAAGCTACCCATTAGCTTCTATTTTTCTTGGCCAGATAAACATTCTCTTGACCACCG  
TCTTTTACCTAAATCTTTTT

In100 candidate3262 (in intron):

LOCUS ENSG00000127080

DESCRIPTION Inositol-pentakisphosphate 2-kinase (EC 2.7.1.158) (Inositol-13,4,5,6-pentakisphosphate 2-kinase) (Ins(1,3,4,5,6)P5 2-kinase) (InsP5 2-kinase) (IPK1 homolog). [Source:Uniprot/SWISSPROT;Acc:Q9H8X2]

AACCTTATTTTATCTCCACACATCTTAACTGCTCTTTCATATTTTTCATATCTTTGTCTCCTTGTGCTACATTCCAGGT  
GCTTTTCTTTTTTTCAGCTCT

In100 candidate3263 (in intron):

LOCUS ENSG00000120451

DESCRIPTION Sorting nexin-19. [Source:Uniprot/SWISSPROT;Acc:Q92543]

TAGATGGCACATAGTGAACGCTCCATAAATAACACGATTCTTATTGTTACTCATCTTCAAATTCTGTTATCCCAGGCTGT  
TGAATTGTCTTGGTTTCCTT

In100 candidate3264 (in intron):

LOCUS ENSG00000185963

DESCRIPTION Protein bicaudal D homolog 2 (Bic-D 2).

[Source:Uniprot/SWISSPR;Acc:Q8TD16]

GGAAAGAATGAAAACCGCAAAGGTAACCTGTTGTTGGTCGTAATCTTTTACTCTTCCTTCATCGTCCAGCTTCT  
GTTTCTGGATCTCAGCCTCT

In100 candidate3265 (in intron):

LOCUS ENSG00000183715

DESCRIPTION Opioid-binding protein/cell adhesion molecule precursor

(OBCAM)(Opioid-binding cell adhesion molecule) (OPCML).

[Source:Uniprot/SWISSPROT;cc:Q14982]



GGCTGGGGGAAATTGATTTCTTTTAAACTAACACTGAATGAATTTCTATTGTATTTTCAGGCACTGGGACATTTCTATTTCTTGCTCATTTAAATTTCTC

In100 candidate3266 (in intron):

LOCUS ENSG00000183715

DESCRIPTION Opioid-binding protein/cell adhesion molecule precursor  
(OBCAM)(Opioid-binding cell adhesion molecule) (OPCML).

[Source:Uniprot/SWISSPROT;cc:Q14982]

GCTGAATCTGGAGAAGCTAACCCCCACTCACAACTGGATTTCTTTTTCTTTTCTGATCCATGACCTATCCAGTTTGATTCAAGCCTTGCTATATCCTTT

In100 candidate3267 (in intron):

LOCUS ENSG00000183715

DESCRIPTION Opioid-binding protein/cell adhesion molecule precursor  
(OBCAM)(Opioid-binding cell adhesion molecule) (OPCML).

[Source:Uniprot/SWISSPROT;cc:Q14982]

CATATGTGTGCAAGTTATTACTGGTACTAAGTTGAACTCCTCAATAACAACACTGACAATACTCACACATTTTTTTTCAGTTTGTCTGCTCCATCTCGTTCT

In100 candidate3268 (in intron):

LOCUS ENSG00000183715

DESCRIPTION Opioid-binding protein/cell adhesion molecule precursor  
(OBCAM)(Opioid-binding cell adhesion molecule) (OPCML).

[Source:Uniprot/SWISSPROT;cc:Q14982]

AATTGTTCTCTGTCTCCTGCTTTCTTATAACCTAACAACTCTCTCTTGTTTGCTGTCCATTTGGGGCCTTTCTTTCAGGTCTCCTTTCTGGATTTCTCTC

In100 candidate3269 (in intron):

LOCUS ENSG00000183715

DESCRIPTION Opioid-binding protein/cell adhesion molecule precursor  
(OBCAM)(Opioid-binding cell adhesion molecule) (OPCML).

[Source:Uniprot/SWISSPROT;cc:Q14982]

ATGAGTAGTCCTTTATTTTCAATTAGGATAATCACTGACTTTTATATTTAACCCTAAATTATATTCTCTTGGTCTCAGCA  
TACGTTTTGCTTCTTCACTG

In100 candidate3270 (in intron):

LOCUS ENSG00000127084

DESCRIPTION FYVE, RhoGEF and PH domain-containing protein 3 (Zinc finger FYE  
domain-containing protein 5). [Source:Uniprot/SWISSPROT;Acc:Q5JSP0]

ATCTTTTTTGGTGACTTGACCTTTTTATAACTATATAATGTCATTCTTTGCTTCTTGTAACAGTTATTTTTTTTCCAGTTG  
GCAGCAGTGATTCTTTTTTTT

In100 candidate3271 (in intron):

LOCUS ENSG00000166086

DESCRIPTION Junctional adhesion molecule C precursor (JAM-C) (Junctional  
adesion molecule 3) (JAM-3) (JAM-2). [Source:Uniprot/SWISSPROT;Acc:Q9BX67]

GTAAACCTCCTTTGTCATTTTTTCATGTTCTTGTCTCTCTGTGCTATTCTGGGTTCTTTATTCATTTTTGTTTTACAGCT  
AACTTTTTCTGCTTCCAGCT

In100 candidate3272 (in intron):

LOCUS ENSG00000166086

DESCRIPTION Junctional adhesion molecule C precursor (JAM-C) (Junctional adhesion molecule 3) (JAM-3) (JAM-2). [Source:Uniprot/SWISSPROT;Acc:Q9BX67]

TGTCACTGTATTCTGAGTAACCCTGAGCATTGCCATTTTCTTCTTTTGTATCATGGCCTGTCTACCTCAAATGCAGGT  
CATGATCTTGTCTTTCTGTT

In100 candidate3273 (in intron):

LOCUS ENSG00000166086

DESCRIPTION Junctional adhesion molecule C precursor (JAM-C) (Junctional adhesion molecule 3) (JAM-3) (JAM-2). [Source:Uniprot/SWISSPROT;Acc:Q9BX67]

AGGTTTAGCGATGAGTAGTTGCTACTCTTTTGTGTCATGTTTTCTTAACCTCCTTCCCCTATTTGTTGTTTTCCAGGTTCT  
TCCTGCTTCTTTGAAAGTGT

In100 candidate3274 (in intron):

LOCUS ENSG00000198954

DESCRIPTION Uncharacterized protein KIAA1279.  
[Source:Uniprot/SWISSPROT;Acc:Q96EK5]

GTTTTTAAAGAAATTAAAAAAGTAACATTGATACAATTCTTTTATCTACACTGCATATTTCTATTTTCATCAGTT  
GTTGCCATAATATTCCTTCT

In100 candidate3275 (in intron):

LOCUS ENSG00000122958

DESCRIPTION Vacuolar protein sorting-associated protein 26A (Vesicle protein sorting 26A) (hVPS26). [Source:Uniprot/SWISSPROT;Acc:O75436]

AACTGAATTGCTGTCTGCATCATATCCTAACCTCAACAAATTTTATTCTCTTTCCTTCTAGTCTTTACCAGCTTGACAG

TTGTGTATTTTACTTCCTCT

In100 candidate3276 (in intron):

LOCUS ENSG00000187231

DESCRIPTION SEC14 and spectrin domains 1 [Source:RefSeq\_peptide;Acc:NP\_83524]

AAGTATTCTGTTGTTGGATGGAGTGTTCTGTAACTGTCAAGATGATTCTTAATGTTTTTCAGGTCTTCTCTATCCATGGT

AATGTTGTGTCTGCCTGTTT

In100 candidate3277 (in intron):

LOCUS ENSG00000144331

DESCRIPTION Zinc finger protein 533. [Source:Uniprot/SWISSPROT;Acc:Q569K4]

EXON

ATGTAGATATATATGTAATTTATATACACATACATAATTTAGTATAACATAGTTATGATATCGTTTTTCCTTGTACCAGCC

CTATTATCTCAATTACATTT

In100 candidate3278 (in intron):

LOCUS ENSG00000115232

DESCRIPTION Integrin alpha-4 precursor (Integrin alpha-IV) (VLA-4) (CD49d

atigen). [Source:Uniprot/SWISSPROT;Acc:P13612]

CTGTAACTCCTCATCTCATTCTGATCCTCTATTGGCCAGGATAATATGATACATTCCTCACTGGTTTTTCTCATGTATTT

TTAAGCCTTCCTATCTTCCT

In100 candidate3279 (in intron):

LOCUS ENSG00000147099

DESCRIPTION Histone deacetylase 8 (HD8). [Source:Uniprot/SWISSPROT;Acc:Q9BY1]

TTTTCTCCCACTCTGTGGGTTGTAACTCTGCTGATTATTTCTTTTGCTGTGCAGAAGCATTTTAGCTTAATTATGTTTC  
ATCTATTTATCTTTATTTTT

In100 candidate3280 (in intron):

LOCUS ENSG00000147099

DESCRIPTION Histone deacetylase 8 (HD8). [Source:Uniprot/SWISSPROT;Acc:Q9BY1]

AGAGTCCTTGTCTACTAACTCCATCATTCTGTCATTTCTGGGTCTGTTTCTGTAACTGATTTTTCTTCAGATTATAGG  
TCACATTTGCCTACTTCTTT

In100 candidate3281 (in intron):

LOCUS ENSG00000150722

DESCRIPTION protein phosphatase 1, regulatory (inhibitor) subunit 1C

[Source:RefSeq\_peptide;Acc:NP\_001074014]

TCTCTTCACTTATAAAACATTTTCTAACATTTCTTTTATCCTCTCATTCTAAATCTGCTCTTTTATATGATTTTGCAGAT  
TTTTATTTATTTATTTATTT

In100 candidate3282 (in intron):

LOCUS ENSG00000150722

DESCRIPTION protein phosphatase 1, regulatory (inhibitor) subunit 1C

[Source:RefSeq\_peptide;Acc:NP\_001074014]

GGTGATATCCCCTTTATAACTTTTTAATGTGTCTATTTGATTCTTCTCTCTTTTCTTCCTTATTAGTCTGGCTAGCAGTC  
TATCTATTTTGTTAATCTTT

In100 candidate3283 (in intron):

LOCUS ENSG00000175787

DESCRIPTION Zinc finger protein 169. [Source:Uniprot/SWISSPROT;Acc:Q14929]

EXON

TCTTAACTATGATTATGCATTGGTCTATTTCTCTTTCTCCTATTCTGTCATTTTTCTTCCTGTATTTTCTCTCAGTCCGT  
GGGTTGTCTTTTCATTATCT

In100 candidate3284 (in intron):

LOCUS ENSG00000148110

DESCRIPTION Hippocampus abundant transcript-like protein 1.

[Source:Uniprot/SWISSPROT;Acc:Q5SR56]

AGGCGTGAGCCACCGTGCCCGCCTCTAACATTTAATAGTACTAATTTTCCTCTGTCCCTTTCTTTTTCTCCTTCAGGA  
TGTTTTTATATTCTTGTCCA

In100 candidate3285 (in intron):

LOCUS ENSG00000184911

DESCRIPTION Doublesex- and mab-3-related transcription factor C1.

[Source:Uniprot/SWISSPROT;Acc:Q5HYR2]

AGTAGCCTCTAACGATCCTTTGAATTTCTGCACTATCAGTTGTAATGTCTCCCTTATCATCCCTGATTTTATTTATTTGG  
TTCTTTTCTTTTATTTCTCA

In100 candidate3286 (in intron):

LOCUS ENSG00000148120

DESCRIPTION Aminopeptidase O (EC 3.4.11.-) (AP-O).

[Source:Uniprot/SWISSPRO;Acc:Q8N6M6]

AACTTGGTGGAGAAAAAGAACATAATAAATTCGAGAAAATAACCATTCTTTTACACTTCTTTTTCTCATTTCAGTTTGC  
TCTTTACTTTTTGTAATACC

In100 candidate3287 (in intron):

LOCUS ENSG00000148120

DESCRIPTION Aminopeptidase O (EC 3.4.11.-) (AP-O).

[Source:Uniprot/SWISSPRO;Acc:Q8N6M6]

TCATCTTTGTAGCCCCCACTAAAAGCCCTCTCTTGAGTGTAACAATAACTTCTTCCTGACAATTCATTTCTTCTCAGTT  
TTTATCTTGCCAATCCTGTC

In100 candidate3288 (in intron):

LOCUS ENSG00000159123

DESCRIPTION Doublesex- and mab-3-related transcription factor C1.

[Source:Uniprot/SWISSPRO;Acc:Q5HYR2]

AGTAGCCTCTAACGATCCTTTGAATTTCTGCACTATCAGTTGTAATGTCTCCCTTATCATCCCTGATTTTATTTATTGG  
TTCTTTTCTTTTATTTCTCA

In100 candidate3289 (in intron):

LOCUS ENSG00000204116

DESCRIPTION Cysteine-rich hydrophobic domain 1 protein (Brain X-linked protin). [Source:Uniprot/SWISSPRO;Acc:Q5VXU3]

AAAAATTAAATGAATTTGCCTAGGATTTTTCATAGCTAATAAGTAACTATAATTCAAGTCTCTCGATCTGTTTTTCAGTG

TTTTTAGTTTGTCTTAGTTT

In100 candidate3290 (in intron):

LOCUS ENSG00000064989

DESCRIPTION Calcitonin gene-related peptide type 1 receptor precursor  
(CGRPtype 1 receptor) (Calcitonin receptor-like receptor).

[Source:Uniprot/SWISSROT;Acc:Q16602]

TGCTTTTATTTGCCTTTCACCTTTATTTACACATATATCTGTA ACTACTGAACTAATTTTTGTGTTTCATTGTTGCCAGAT  
GTGTTTAAATCTCTCTTCTG

In100 candidate3291 (in intron):

LOCUS ENSG00000064989

DESCRIPTION Calcitonin gene-related peptide type 1 receptor precursor  
(CGRPtype 1 receptor) (Calcitonin receptor-like receptor).

[Source:Uniprot/SWISSROT;Acc:Q16602]

TTTCTATCCTAGCTGTACCAAATGACCATAAATTTAGTAACTTAAAACAACATTTATTTACTATCTATCTCACAGTTCTA  
TTGGTCAGTTCTGTTGCCTT

In100 candidate3292 (in intron):

LOCUS ENSG00000064989



DESCRIPTION Calcitonin gene-related peptide type 1 receptor precursor  
(CGRPtype 1 receptor) (Calcitonin receptor-like receptor).

[Source:Uniprot/SWISSROT;Acc:Q16602]

TGACCAAATTCTCATTTTTTCTTAGATCACATCTGAATATATTTAACCAATATTGTGACCTGTTATCTCATTTCCAGTT  
TCTTCATATTTTTCTTCAAT

In100 candidate3293 (in intron):

LOCUS ENSG00000144366

DESCRIPTION GULP, engulfment adaptor PTB domain containing 1

[Source:RefSeqpeptide;Acc:NP\_057399]

AACATCCATAGTTAACATTTATATTGTTACTTTGTTGTTTTTGAAATTGTTCTTTTCACAGTTTGAATCCAATGGCATT  
TTTCTTTTCGATCCTGTCTT

In100 candidate3294 (in intron):

LOCUS ENSG00000144366

DESCRIPTION GULP, engulfment adaptor PTB domain containing 1

[Source:RefSeqpeptide;Acc:NP\_057399]

CTTCCAAAGAACTAACTTTTGGGTTTGTTCATTGTTTTTATGGATTTTTTCTCTCAATTTCAATTCACCTCAGAT  
TTTAGTTATATCTTCTGCTA

In100 candidate3295 (in intron):

LOCUS ENSG00000050030

DESCRIPTION Uncharacterized protein KIAA2022.

[Source:Uniprot/SWISSPROT;AccQ5QGS0]

GTGGTACGTTTGTCACAATTAATGAACTGATATTGATATATTATAATTAATAAGTCTATACTTTATATTTCTTCAGTT  
TTCTTCTAATGTCCTTTTTC

In100 candidate3296 (in intron):

LOCUS ENSG00000050030

DESCRIPTION Uncharacterized protein KIAA2022.

[Source:Uniprot/SWISSPROT;AccQ5QGS0]

CCTTGATCTTTAAATGATGACAAATTGTCCAAATGTATTAACCTTTCCCTTTATTTTCTCTTTGCTTTATTCTCAGTA  
ACCTCTTTTCTCTAATTCTT

In100 candidate3297 (in intron):

LOCUS ENSG00000050030

DESCRIPTION Uncharacterized protein KIAA2022.

[Source:Uniprot/SWISSPROT;AccQ5QGS0]

TCATTATGGTTTGGTGGTTTTCCGTAGTCATAACATTTGAGTCCTTTTTTGTCTTGTTTGTCTGTTTGCTCTACCAAGTG  
GTTTTATACTTTTGTGTCTT

In100 candidate3298 (in intron):

LOCUS ENSG00000050030

DESCRIPTION Uncharacterized protein KIAA2022.

[Source:Uniprot/SWISSPROT;AccQ5QGS0]

TTAACATTATTGAGTCTTCTTATTCATGAGCATGGAATGTTTTCTTATTTGTTTGTGTCATCTTTCATTTCTTTCAGCA  
GTATTTTGTCAATTTTTTGT

In100 candidate3299 (in exon):

LOCUS ENSG00000050030

DESCRIPTION Uncharacterized protein KIAA2022.

[Source:Uniprot/SWISSPROT;Acc:Q5QGS0]

AGAGTCCCATTTAATCTTTACTTTCCTGGAAATGGTAACCTCCCTTATTCTTCTTACTTAATCTCAGACCTTGGTCTTAG  
AATTTTCTTTTATGGTCTC

In100 candidate3300 (in intron):

LOCUS ENSG00000182150

DESCRIPTION RAD26L hypothetical protein

[Source:RefSeq\_peptide;Acc:NP\_00101895]

ATTATTGATATTTTTTATTTAACTTTTATCTTTTATCTCCTATTTCTAGTTCCACTGTTTCTCTTATTCAGACATTTCT  
TTAGGATTCTGTATTTGTTT

In100 candidate3301 (in intron):

LOCUS ENSG00000172731

DESCRIPTION Leucine-rich repeat-containing protein 20.

[Source:Uniprot/SWISPROT;Acc:Q8TCA0]

GGGAGTTGAGGGTGTTTGCAAGTCCTTATGTCTTAACACCTTATCATTTTGTTTTCTCACCTTTCTTTCAGTCTCTTTT  
CCTCTAGTGATCCAATTTCT

In100 candidate3302 (in intron):

LOCUS ENSG00000128699

DESCRIPTION ORM1-like protein 1 (Adoplin-1).

[Source:Uniprot/SWISSPROT;Acc:9P0S3]

AATAATCTACCTGGATAGCATGTAACCTGTATCTGGTATCTAATTTCTTTCTCCTATCTGATGTTCTGGGCCTTCCAGAA

AATAGTTCTTACCTCCTTTT

In100 candidate3303 (in intron):

LOCUS ENSG00000130956

DESCRIPTION Intracellular hyaluronan-binding protein 4 (IHABP4) (Ki-1/57  
intracellular antigen). [Source:Uniprot/SWISSPROT;Acc:Q5JVS0]

TGTTATAATTTTCAACTTGTTAGGTAATTAACCTTCTTAGTGGCTTTTCTGCCTTACATTTTGAATGCCTTTTCCAGTT  
CTGAACTCTTTTTTTTTTTTTT

In100 candidate3304 (in intron):

LOCUS ENSG00000102383

DESCRIPTION Palmitoyltransferase ZDHHC15 (EC 2.3.1.-) (Zinc finger DHHC  
domin- containing protein 15) (DHHC-15).

[Source:Uniprot/SWISSPROT;Acc:Q96MV8]EXON

TATGATACATTTGTTACAATTAATGAACTAATACTGATACATTATTTTAACTGAAGTCTATATTTAGATTTTCCTCAGTT  
TTTCCATAATGTCCTTTATC

In100 candidate3305 (in intron):

LOCUS ENSG00000166224

DESCRIPTION Sphingosine-1-phosphate lyase 1 (EC 4.1.2.27) (SP-lyase)  
(hSPL)(Sphingosine-1-phosphate aldolase). [Source:Uniprot/SWISSPROT;Acc:O95470]

AGTGCTATTAACACTACACTACAAATTCTATTTCTAGTTCATCAGGGTTTTTTTTTTGTTTTGCTATGTTTTGTTTTAAACTA  
ATGTTCTTTTTTCTATTCTA

In100 candidate3306 (in intron):

LOCUS ENSG00000085224

DESCRIPTION Transcriptional regulator ATRX (EC 3.6.1.-) (ATP-dependent  
heliase ATRX) (X-linked helicase II) (X-linked nuclear protein) (XNP) (Znf- HX)  
[Source:Uniprot/SWISSPROT;Acc:P46100]

TTTTTAAATTTTCTTTTAACTTTTACAAAAACCAACATTTTGTTTTATTGATATTTTGTATTATTTTCTTTATTTTCAGTT  
TCGTTTGCTTCACTCTGATC

In100 candidate3307 (in intron):

LOCUS ENSG00000085224

DESCRIPTION Transcriptional regulator ATRX (EC 3.6.1.-) (ATP-dependent  
heliase ATRX) (X-linked helicase II) (X-linked nuclear protein) (XNP) (Znf- HX)  
[Source:Uniprot/SWISSPROT;Acc:P46100]

AGATTAGTAGTAATGTCCTCTTTTTCATTTCTGATTCTAGTAACTTGAGTCTTGTTTCTTTTTTTTCTTGGTCAGTCTAC  
CCTAAAGTTTGTTTCATCTTT

In100 candidate3308 (in intron):

LOCUS ENSG00000085224

DESCRIPTION Transcriptional regulator ATRX (EC 3.6.1.-) (ATP-dependent  
heliase ATRX) (X-linked helicase II) (X-linked nuclear protein) (XNP) (Znf- HX)  
[Source:Uniprot/SWISSPROT;Acc:P46100]

AACATGTTTAATATATGAATAACAATTTTAACTTTTTTCATTGACTCAGGGTTATTAATGAGTGCATTTACTTTTATTTT  
ATTTTATTTAATTTTTTTTTT

In100 candidate3309 (in intron):

LOCUS ENSG00000196312

DESCRIPTION Hippocampus abundant transcript-like protein 2.

[Source:UniprotSWISSPROT;Acc:Q5VZR4]

AGGCGTGAGCCACCGTGCCTGGCCTCTAACATTTAATAGTACTAATTTTTCCTCTGTCCCTTTCTTTTCTCCTTCAGGA  
TGTTTTTATATTCTTGTCCA

In100 candidate3310 (in intron):

LOCUS ENSG00000138378

DESCRIPTION Signal transducer and activator of transcription 4.

[Source:Unirot/SWISSPROT;Acc:Q14765]

CTCTTGCCCTGCTCACACCTCACTAGCTACCCACTGTAAGATAATTAACAAATTATCATCTTGACTCTATTTCAGAACTT  
GGTTTTCTTTAATAATCCTC

In100 candidate3311 (in intron):

LOCUS ENSG00000144339

DESCRIPTION Transmembrane protein with EGF-like and two follistatin-like  
doains 2 precursor (Transmembrane protein containing epidermal growth factor nd  
follistatin domains) (Tomoregulin) (TR) (Hyperplastic polyposis protein ).

[Source:Uniprot/SWISSPROT;Acc:Q9UIK5]

AGAAATTAAGTATGATCATTTTTGAGTTTTTCCTTTTATTTTTTATCCATTGCTCAGTTGTTTGAATTATTTTCCATTA  
GTTCTGTGTTTCTTTTCTTC

In100 candidate3312 (in intron):

LOCUS ENSG00000196950

DESCRIPTION solute carrier family 39 (zinc transporter), member 10

[Source:efSeq\_peptide;Acc:NP\_065075]

AGTCATAACATGATATAGCCATCCGTTTATTTAGGTCTTTTATTTCTCTCAGTAATTTTCTGTCAATAATATTCTCTCA  
ATAATTTCTCTCTTTTCTAT

In100 candidate3313 (in intron):

LOCUS ENSG00000196950

DESCRIPTION solute carrier family 39 (zinc transporter), member 10

[Source:efSeq\_peptide;Acc:NP\_065075]

CTAGTTTGATATTAGTTTAACCAACCCCTGCTCTCTTTTGGTTACTATTTTCATGGAATATCGTTTTCCATCTTTTCAGTT  
TCAGCCTGTTTGTGTCTTTG

In100 candidate3314 (in intron):

LOCUS ENSG00000118997

DESCRIPTION axonemal dynein heavy chain 7

[Source:RefSeq\_peptide;Acc:NP\_06120]

ATGATCTGATAACCCTACCTACTCCATTTATTTTTCTTTATAATTCTTCCACTTTGAATCTTTCTCTCAGGGCCTTCCTC  
ATTCTCTTTTCCATCTTTTT

In100 candidate3315 (in intron):

LOCUS ENSG00000118997

DESCRIPTION axonemal dynein heavy chain 7

[Source:RefSeq\_peptide;Acc:NP\_06120]

GTTCTACCTATCTCTCTACCTCTTCTTTAAGGCCAATAACTCTTAGATTTGCCCTTTTGAGGCTATTTTCCAGATCCT  
ATAGGTGTACTTCATTCTTT

In100 candidate3316 (in intron):

LOCUS ENSG00000118997

DESCRIPTION axonemal dynein heavy chain 7

[Source:RefSeq\_peptide;Acc:NP\_06120]

TACATATAATATTGTGGAACCTTTATATAATCATATTTCTCCTCATCTAACTATATAGAAATCCCTTTTTGTGATCCAGAT  
TTGAATGTCTTTCTCTTGTT

In100 candidate3317 (in intron):

LOCUS ENSG00000118997

DESCRIPTION axonemal dynein heavy chain 7

[Source:RefSeq\_peptide;Acc:NP\_06120]

CCATCTGGGATATATAGCAATTGTTGCTTTCTCTCAATTTTCTTTAACACAAGGGCTAATATTTTCCAATTCCCAGTT  
AATTTTTTCTATTCCTTTGT

In100 candidate3318 (in intron):

LOCUS ENSG00000138411



DESCRIPTION E3 ubiquitin-protein ligase HECW2 (EC 6.3.2.-) (HECT, C2 and WWdomain-containing protein 2) (NEDD4-like ubiquitin-protein ligase 2).

[Source:Uniprot/SWISSPROT;Acc:Q9P2P5]

GGAAC TTTT TCAAACATGAG TTTT AACCACTGCTTAT TTTT CTTAATGTTTAT TTTT CATGTCATT CGGTTT TCCAGTG  
TTGGATT TGCCTT TCTCTAT

In100 candidate3319 (in intron):

LOCUS ENSG00000138411

DESCRIPTION E3 ubiquitin-protein ligase HECW2 (EC 6.3.2.-) (HECT, C2 and WWdomain-containing protein 2) (NEDD4-like ubiquitin-protein ligase 2).

[Source:Uniprot/SWISSPROT;Acc:Q9P2P5]

TCACACACT TTTT CTCATGCAATACTAACCTTGCAATGCCCCTGGGTTTGCCTTTTCTGTCTTCCTTGTT CAGGAATATTT  
CCTCATAGCACT TTTT TGTTT

In100 candidate3320 (in intron):

LOCUS ENSG00000144395

DESCRIPTION CDNA FLJ39660 fis, clone SMINT2006801.

[Source:Uniprot/SPTREMBLAcc:Q8N8C6]

TGTATCCCTGTCATTACATAACTCATTACTGTATTTGTGTCATCCTCAATTTGTTTCATCAGCCTTTTAGAGTTTTTATT  
GTACAGATCTTTCACCTCCT

In100 candidate3321 (in intron):

LOCUS ENSG00000138303

DESCRIPTION Activating signal cointegrator 1 complex subunit 1 (ASC-1 complex subunit p50) (Trip4 complex subunit p50). [Source:Uniprot/SWISSPROT;Acc:QN9N2]

GAGAGAGGAGTGTTGAAATCTCCACCTGTAAGTGTGGATTTCATCTATTTCTCTTTTCAGTTCTACCAGTTTTTTCCACAC

CTTCTTGATAAGATCCTTTT

In100 candidate3322 (in intron):

LOCUS ENSG00000065413

DESCRIPTION Ankyrin repeat domain-containing protein 44.

[Source:Uniprot/SWSSPROT;Acc:Q8N8A2]

TTAAACTAAATAAATAGAAAGCTAACGGGTTTCTAATTCCTTTTGAATTTCTTTTTTTCAGAAATGATTTATCCATTCC

ATGTTTTATTTACATTCTT

In100 candidate3323 (in intron):

LOCUS ENSG00000078589

DESCRIPTION Putative P2Y purinoceptor 10 (P2Y10) (P2Y-like receptor).

[Source:Uniprot/SWISSPROT;Acc:O00398]

TATGATGGAGTTTTAGTCATAACTTTGTGCGTGCCATTTTTATTATCAGGAACATCTTTAGAGCCATACTTTGATTTTTG

TTTTTTTGCCCATATTTTCT

In100 candidate3324 (in intron):

LOCUS ENSG00000204234

DESCRIPTION

AGCTTTTCATTAAGCTTAGAGTTGCCTCCTTTTATTGCTTTTTACATGTTTACAGTATCTCATTCTTTCCTTGATT

CTGGATTTTCACACCATATG

In100 candidate3325 (in intron):

LOCUS ENSG00000166321

DESCRIPTION Nucleoside diphosphate-linked moiety X motif 13 (EC 3.-.-.-)

(Ndix motif 13) (Protein KiSS-16). [Source:Uniprot/SWISSPROT;Acc:Q86X67]

AAGGAAAAATAGGTATTATTCATAATTTATTCTCAATGTTAACCACTCTTAACATTTTAGTATTTGTACTTCCAGGATTT  
ATTTAATGTATCTTATCTTT

In100 candidate3326 (in intron):

LOCUS ENSG00000163535

DESCRIPTION Shugoshin-like 2 (Tripin). [Source:Uniprot/SWISSPROT;Acc:Q562F6]

AGTTTTATTCCCCCTAACCTCCTAATATATAGCTTTTCTTTTATTTGTTTGTTTGTTTGTTTGTTTGTTCCAGGTTTTGGCTTT  
TATTTTTTCTTACCTTGTTG

In100 candidate3327 (in intron):

LOCUS ENSG00000138286

DESCRIPTION

CTACTTTTTTGATATAAGCATTTATTGCTATAACTTTCCTCTTAATACTGCTTTTGCTGTATCCTACAGGTTTTAATAGA  
TTGTATTTTTATTTTCATTT

In100 candidate3328 (in intron):

LOCUS ENSG00000136928

DESCRIPTION Gamma-aminobutyric acid type B receptor, subunit 2 precursor

(GBA-B receptor 2) (GABA-B-R2) (Gb2) (GABABR2) (G-protein coupled receptor 51  
(HG20). [Source:Uniprot/SWISSPROT;Acc:O75899]

AAGTACTCCATGGCTTTATAAATAACCCACTTATATCTCCTTTTGGTTACAGTAATGGTTTGATTTTTAAATATTTAACT  
CTTTTTTTTATTGTTTTCTT

In100 candidate3329 (in intron):

LOCUS ENSG00000136928

DESCRIPTION Gamma-aminobutyric acid type B receptor, subunit 2 precursor  
(GBA-B receptor 2) (GABA-B-R2) (Gb2) (GABABR2) (G-protein coupled receptor 51  
(HG20). [Source:Uniprot/SWISSPROT;Acc:O75899]

CATTTCTTAGGAATCCTAGGACAACCTTGGGGTAACTGTATTGTGATTATGTATTTTGTCTGGGTCTTTCCTTCCAGAT  
ATTTTCATCTCTTTGTTCCC

In100 candidate3330 (in intron):

LOCUS ENSG00000156042

DESCRIPTION tetratricopeptide repeat domain 18  
[Source:RefSeq\_peptide;Acc:N\_660153]

TAACAATTATCAACATTCTGCCAAAGGCCTTTTGACTCCCCTGCTTTTGTTTTGACTTTATTCTATTTTTCCCGTCAGAA  
CACCCAGTTGTCTTTTTTATT

In100 candidate3331 (in intron):

LOCUS ENSG00000183035

DESCRIPTION Cylicin-1 (Cylicin I) (Multiple-band polypeptide I).  
[Source:Unprot/SWISSPROT;Acc:P35663]

CTTAATTCCTAGTAATTTTACTATTAGGTGATCAATCTCATATCTAACATTTTAATTATTTGACTTTCTCTTCTCCAGTT  
ATTTTGTCTTACATCCTACT

In100 candidate3332 (in intron):

LOCUS ENSG00000072133

DESCRIPTION Ribosomal protein S6 kinase alpha-6 (EC 2.7.11.1) (S6K-alpha 6)(90 kDa ribosomal protein S6 kinase 6) (p90-RSK 6) (Ribosomal S6 kinase 4) RSK-4) (pp90RSK4). [Source:Uniprot/SWISSPROT;Acc:Q9UK32]

AGATGATGGGATTTTCATTGATGGGAGACTTTTTGTAACTGATTTAATCCTGTTACTTTCTATTGGTCTGTTTCAGATTTTCTATTTTGTCCATTCAATTT

In100 candidate3333 (in intron):

LOCUS ENSG00000107758

DESCRIPTION Serine/threonine-protein phosphatase 2B catalytic subunit beta soform (EC 3.1.3.16) (Calmodulin-dependent calcineurin A subunit beta isofom) (CAM-PRP catalytic subunit). [Source:Uniprot/SWISSPROT;Acc:P16298]

TCTAACTTGTCTCTAGATTCTATTACCTTTCTGCTTTTTTCAGGAACTTGCTTTATCGTTTATGTCCTCTATATCTTCACATTCTCAGTACTAGTTCTTT

In100 candidate3334 (in intron):

LOCUS ENSG00000136874

DESCRIPTION Syntaxin-17 (KAT01814). [Source:Uniprot/SWISSPROT;Acc:P56962]

AGACCTTAAGGTTTCATAGATTTAACATTAACATGTTTGTTGTTTTGTTTTGCCTTTCAGATTATTTATCTCCTGGTCATCAAAGATTCCTTTTTTTTAT

In100 candidate3335 (in intron):

LOCUS ENSG00000136874

DESCRIPTION Syntaxin-17 (KAT01814). [Source:Uniprot/SWISSPROT;Acc:P56962]

AACTATATCTTCTGTATTTCTTAACTTTTCTTCTATATTTTTTACTTTCCTTGTTTCTTTTTTACATAGTTTCTTCAGAT

CTGTTTTCCAATTTATATCT

In100 candidate3336 (in intron):

LOCUS ENSG00000136874

DESCRIPTION Syntaxin-17 (KAT01814). [Source:Uniprot/SWISSPROT;Acc:P56962]

AGATTTTTTAAACCTATCCTAGCTTTGTTTTATAACTACTGCCCTTGTTTTCTTTTTTTGTTTCAGTGTTCCTCTTTTGT

AGTAACTTGTCTCATCTTGT

In100 candidate3337 (in intron):

LOCUS ENSG00000188419

DESCRIPTION Rab proteins geranylgeranyltransferase component A 1 (Rab escort protein 1) (REP-1) (Choroideraemia protein) (TCD protein).

[Source:Uniprot/SWISSPROT;Acc:P24386]

TTTTGATTTCAATAAGGGTTTTAACTTAAAAACTGCATTTAGCTATTTAAACTTTCTCCTATTTCCCTCTACTCCAGAA

ATTCTTATTTTGTTTACTTG

In100 candidate3338 (in intron):

LOCUS ENSG00000188419

DESCRIPTION Rab proteins geranylgeranyltransferase component A 1 (Rab escort protein 1) (REP-1) (Choroideraemia protein) (TCD protein).

[Source:Uniprot/SWISSPROT;Acc:P24386]

TCTTTTATTCCTCATAACATCTCTTTCCCATTTCTTGTCTTTTTCTTTTCGATGCTGTATTCTGAGTAATTCCTCAGCT  
TTATCTTCTGGTTTTGAGTT

In100 candidate3339 (in intron):

LOCUS ENSG00000023318

DESCRIPTION Thioredoxin domain-containing protein 4 precursor (Endoplasmic  
eticulum resident protein ERp44). [Source:Uniprot/SWISSPROT;Acc:Q9BS26]  
GTAGGGAAGAACTTCCTAACTGGGTGGCTGATATTATTGATCTCTTCAGCCTTGCCCCATTTGCCTCTGTTGGGAGTAGC  
CTTTGTTGTTTTGATTCTCT

In100 candidate3340 (in intron):

LOCUS ENSG00000023318

DESCRIPTION Thioredoxin domain-containing protein 4 precursor (Endoplasmic  
eticulum resident protein ERp44). [Source:Uniprot/SWISSPROT;Acc:Q9BS26]  
GAGCATTTCTACTGTAACTACCTCATTCTTCCCTGTTAGGCTATTTTCTCTGGTTCTTTTATGCTCCAGTAGTTCCAT  
CTGTCTGTCCGTCTGTCTTT

In100 candidate3341 (in intron):

LOCUS ENSG00000023318

DESCRIPTION Thioredoxin domain-containing protein 4 precursor (Endoplasmic  
eticulum resident protein ERp44). [Source:Uniprot/SWISSPROT;Acc:Q9BS26]  
GTAGTAATAACATTTTCACAATATTGATTCTTCCAATCCATAAACATAGAATTTCTTTCCTTTTTTTGTCCCTTTCAGTT  
TCTTCCATCGATGTTTTATA

In100 candidate3342 (in intron):

LOCUS ENSG00000119509

DESCRIPTION Inversin (Inversion of embryo turning homolog) (Nephrocystin-2)

[Source:Uniprot/SWISSPROT;Acc:Q9Y283]

AACATATTAGACTATCCATTTTATAACCCCTGCTCACCTCTCTGATCTTACTTTTCACTTCCTCTTACAGTGCATTTCTT  
TTCTTTTTTCTTTTTTTTTTA

In100 candidate3343 (in intron):

LOCUS ENSG00000126733

DESCRIPTION Dachshund homolog 2 (Dach2). [Source:Uniprot/SWISSPROT;Acc:Q96N9]

GTGAATTACTGATAGATGGCTGCTGAAATGTACAACTATAACAATGGGTTCATTTTTTTTACCCTTGAAATTTTATCAGTT  
TTGCCTCATGTATCTTGTGC

In100 candidate3344 (in intron):

LOCUS ENSG00000126733

DESCRIPTION Dachshund homolog 2 (Dach2). [Source:Uniprot/SWISSPROT;Acc:Q96N9]

AAGTATTCTCATTAATACTAGAAATTTTCCTCTAACCATTGTTTTACTTTGTTCCCTTTTCATTTACAATGATTTTCAGAA  
CTAACTTTCTATTTGACTTC

In100 candidate3345 (in intron):

LOCUS ENSG00000126733

DESCRIPTION Dachshund homolog 2 (Dach2). [Source:Uniprot/SWISSPROT;Acc:Q96N9]

AGATTTCTCTTTTCATGTGATTGAGCTTCTCTAAAATTAACATTTTGAATATTTTATCTGTCATTCAGTAATTTCATTTTG  
ATTCATTTCTTTTCCTGAAC



In100 candidate3346 (in intron):

LOCUS ENSG00000082146

DESCRIPTION Pseudokinase ALS2CR2 (Amyotrophic lateral sclerosis 2 chromosomal region candidate gene 2 protein) (STRAD beta) (ILP-interacting protein) (ALS-21). [Source:Uniprot/SWISSPROT;Acc:Q9C0K7]

GAGTACAATGAATGCTCTAACTTTGCCTTCTGTAATACTATTCACCTCCTACTTCTCTTCTATTTCTTTTTCTTTACAGTG  
TCCTTTACTATTTCTTCCTC

In100 candidate3347 (in intron):

LOCUS ENSG00000155754

DESCRIPTION Amyotrophic lateral sclerosis 2 chromosomal region candidate gene 11 protein. [Source:Uniprot/SWISSPROT;Acc:Q53TS8]

TTCTTACACTATCTTCCATGTCTTTTAACCTATAAAAAATATTTTTCATCACTTTGTCTCTCTGCCCAGCATTCGAAGTA  
ATTCTTCTGATCTTTATTTT

In100 candidate3348 (in intron):

LOCUS ENSG00000102290

DESCRIPTION Protocadherin-11 X-linked precursor (Protocadherin-11)  
(Protocadherin on the X chromosome) (PCDH-X) (Protocadherin-S).  
[Source:Uniprot/SWISSPROT;Acc:Q9BZA7]

AACAATATTCATTCTTCCAATTCATTAACATGGAATGTCTTTCCATTTTTTTTGTCTCTACAGTTTTTTCCAGCACTGT  
TTTATAATGTTTCATTGTCTT

In100 candidate3349 (in intron):

LOCUS ENSG00000102290

DESCRIPTION Protocadherin-11 X-linked precursor (Protocadherin-11)

(Protocadherin on the X chromosome) (PCDH-X) (Protocadherin-S).

[Source:Uniprot/SWISPROT;Acc:Q9BZA7]

AGTAAGTTTACAAGTAACTTAAATGTGAGACTTTTTACTTTATTCTTCTTTTCAAGATTGTTTTCACTATTGCAGGTCTC  
TTGAAATTCCATATGTTTTT

In100 candidate3350 (in intron):

LOCUS ENSG00000102290

DESCRIPTION Protocadherin-11 X-linked precursor (Protocadherin-11)

(Protocadherin on the X chromosome) (PCDH-X) (Protocadherin-S).

[Source:Uniprot/SWISPROT;Acc:Q9BZA7]

GATGTATTTTAACCTAAATTTTATCTATCTATCTATCATCTATCTATCTATCTATTTATCTATCTTCCTATTTAACAGAT  
TTTCTATTTGTACATTCATG

In100 candidate3351 (in intron):

LOCUS ENSG00000102290

DESCRIPTION Protocadherin-11 X-linked precursor (Protocadherin-11)

(Protocadherin on the X chromosome) (PCDH-X) (Protocadherin-S).

[Source:Uniprot/SWISPROT;Acc:Q9BZA7]

ATATTTTCTCCATTTTGTGAGTTGTCTTTTAACTTTGTTTATTATTTTCTTCATCCTGCAGAAGCTTTTAACTTTACG  
TGATCCCATTTGTCCATTTT

In100 candidate3352 (in intron):

LOCUS ENSG00000102290

DESCRIPTION Protocadherin-11 X-linked precursor (Protocadherin-11)  
(Protocadherin on the X chromosome) (PCDH-X) (Protocadherin-S).

[Source:Uniprot/SWISPROT;Acc:Q9BZA7]

TTTGTCTTGATACCTATCTTGTCTTATATAACTGTTCTGCTCTTTTTTTTGGATTTTCATTGGCAGGTATATTTTGGCAG  
ATATATTTTCTATCCCCTT

In100 candidate3353 (in exon):

LOCUS ENSG00000102290

DESCRIPTION Protocadherin-11 X-linked precursor (Protocadherin-11)  
(Protocadherin on the X chromosome) (PCDH-X) (Protocadherin-S).

[Source:Uniprot/SWISPROT;Acc:Q9BZA7]

ATAACGTTAAAAGGTATACGTACTCTAGCCTTTTTTTGGGCTTCTTTTTTGATTTTGTGTTGTTTTCAGTTTTTTTG  
TTGTTGTTAGTGAGTCTCCC

In100 candidate3354 (in intron):

LOCUS ENSG00000182329

DESCRIPTION

AGGGATATCTAGTCTTCTAACTTAGCCTGTTACTCCTTCCATTTATTCAGGGAATTTTTTTTTTTTTTTTTTTTTTTT  
TTCCTGTACCAGGCCAAATT

In100 candidate3355 (in intron):

LOCUS ENSG00000116030

DESCRIPTION Small ubiquitin-related modifier 1 precursor (SUMO-1)  
(Sentrin)(Ubiquitin-like protein SMT3C) (SMT3 homolog 3) (Ubiquitin-homology

domain rotein PIC1) (Ubiquitin-like protein UBL1) (GAP-modifying protein 1)  
(GMP1) [Source:Uniprot/SWISSPROT;Acc:P63165]

GTGAAGTTGTTTTAACTAATTTATTCTGTTAACCTCATTTTCATTTTCAGTATCTCTTTATTGGAAATTGTTTTGTAAC TG  
TTTTTGTGATCTTTTTTTTTT

In100 candidate3356 (in intron):

LOCUS ENSG00000204217

DESCRIPTION Bone morphogenetic protein receptor type-2 precursor (EC  
2.7.1130) (Bone morphogenetic protein receptor type II) (BMP type II receptor)  
(BPR-II). [Source:Uniprot/SWISSPROT;Acc:Q13873]

CCTTTTGGCGGGGGTGGAATTTAACTTTAGACTGTTATTTCTCTCTCTTCAGTTTTTCACTGTTTCTTTCATAATTC  
ACTCATCGAATGCCTTGATT

In100 candidate3357 (in intron):

LOCUS ENSG00000148123

DESCRIPTION plasticity related gene 3  
[Source:RefSeq\_peptide;Acc:NP\_060223]EXON

GAGTCTCTTTCTAGGGAAGTTGTCCTGACCTCTTAACTCTAAGGTTGGCTTCTCTTTCTATGTGTTTCAGTAGTCCCCAA  
CTCTGTATTTTTTTTGTGCCT

In100 candidate3358 (in intron):

LOCUS ENSG00000148123

DESCRIPTION plasticity related gene 3

[Source:RefSeq\_peptide;Acc:NP\_060223]EXON

TAACCCTAGACTCCATTTGTTCTACTCTGCAGCCTGAGCTTTCTCCCAGAGTCTGAGCTCTCTGCTTGCTGTTTAGGTGC  
CTTTTCTGTTCTGTGCTTTT

In100 candidate3359 (in intron):

LOCUS ENSG00000138442

DESCRIPTION WD repeat protein 12 (YTM1 homolog).

[Source:Uniprot/SWISSPROT;cc:Q9GZL7]

TACCTGTCATTTGCTTGATATATTAACATACAATAGTCTTTTCCTCCTTAATTCTCAAAATTGCTTTTTTCCCTCCAGTA  
CTTCTGTTCCACTTAGTTTG

In100 candidate3360 (in intron):

LOCUS ENSG00000147202

DESCRIPTION Protein diaphanous homolog 2 (Diaphanous-related formin-2) (DRF).

[Source:Uniprot/SWISSPROT;Acc:O60879]

ATCTTTTCAAAAAAAAAAACCTAACTTTTTGTTTTGTTGCTCTTTTGTATTATATTTTAAATCTCTGTCTGGCTCAGTT  
CTGCTCTGATCTTTATTATT

In100 candidate3361 (in intron):

LOCUS ENSG00000147202

DESCRIPTION Protein diaphanous homolog 2 (Diaphanous-related formin-2) (DRF).

[Source:Uniprot/SWISSPROT;Acc:O60879]

ATGCACCTTAACGTTTTATTCAATTTTGCTATTCTTTCAGTGATGGTTTCCCTATGTCTGCGGTTTTTCGTTTTTTACTGT  
GTGTGTATCCTTATATTTT

In100 candidate3362 (in intron):

LOCUS ENSG00000147202

DESCRIPTION Protein diaphanous homolog 2 (Diaphanous-related formin-2) (DRF).

[Source:Uniprot/SWISSPROT;Acc:O60879]

TTATGCCTTTATTGCTCCCATAGCTGGTGTGACATGGAGAGTTATAACCACTGAGTTCACCTTACGTTAATTCTCAGGG  
ATGTTCTTCCTTCTATCTTA

In100 candidate3363 (in intron):

LOCUS ENSG00000147202

DESCRIPTION Protein diaphanous homolog 2 (Diaphanous-related formin-2) (DRF).

[Source:Uniprot/SWISSPROT;Acc:O60879]

TTTCCTTAACAATGAATGAACTCTCTGTTCTCCTTTCTATATCAGGGTATCTGCTTATTTATGGTTTCTACTGCCATGTG  
GCTTTTAACATCCTCTCTCT

In100 candidate3364 (in intron):

LOCUS ENSG00000147202

DESCRIPTION Protein diaphanous homolog 2 (Diaphanous-related formin-2) (DRF).

[Source:Uniprot/SWISSPROT;Acc:O60879]

TATCTTAGATAGGCTGTATAGTAGAGACTTTACTGTAACGAGAAAGATCCTGAATTGTTACCCTACTTGTCTTCCCAGAT  
GTTTTCTTTGTTAGGCTTTT

In100 candidate3365 (in intron):

LOCUS ENSG00000163597

DESCRIPTION Amyotrophic lateral sclerosis 2 chromosomal region candidate gene 16 protein. [Source:Uniprot/SWISSPROT;Acc:Q6ZP36]

AAAGGAACACTGTGTGTTTCCTTGAGTATGTATTTCCCATTCAAATTTGTAACCTAACATTTTGCCATATTTGCTTCAGTTCTTTCTTTTCCCTGTGAAAT

In100 candidate3366 (in intron):

LOCUS ENSG00000144426

DESCRIPTION Neurobeachin-like 1 (Amyotrophic lateral sclerosis 2 chromosomal region candidate gene 17 protein). [Source:Uniprot/SWISSPROT;Acc:Q6ZS30]

AATTAAGTGCAAAATGTTTTGCCTACTCCTTAGTTTTGTCTACTCCTTAGTTTTGTCTATATTTCCGTAACTGCCAGAAATTCATGGTTTTCTTTTTTTTA

In100 candidate3367 (in intron):

LOCUS ENSG00000165152

DESCRIPTION Uncharacterized protein C9orf125.

[Source:Uniprot/SWISSPROT;Acc:Q9BRR3]

AGAAGTTGCACTAAATATAACTATTGTTGTAGCTCCATTTATTCATCTAAGCCCTAGTTCATGTTTCATTTCTCAGAGTCTGTGTCCTTTACTGTCTTCC

In100 candidate3368 (in intron):

LOCUS ENSG00000156110

DESCRIPTION Adenosine kinase (EC 2.7.1.20) (AK) (Adenosine 5'-phosphotransferase). [Source:Uniprot/SWISSPROT;Acc:P55263]

AAGAAAAATCCTGCATCACTGATATGAAATGTACCAAATTAAGTAACATCATCTTATTTCTTCTGATTTTGTTTTTCAGTTTGTTTATATTCCTTTCCATA

In100 candidate3369 (in intron):

LOCUS ENSG00000156110

DESCRIPTION Adenosine kinase (EC 2.7.1.20) (AK) (Adenosine 5'-phosphotransfrase). [Source:Uniprot/SWISSPROT;Acc:P55263]

AGTGTTGACCTTACCATAACTCTGAACTTTTCCTGTCTTGCTTAGCTTATGTGATACCTTTTCCCTCAGGTTTTTCTTC  
TTTTCTGGCTCCTCTTCTTC

In100 candidate3370 (in intron):

LOCUS ENSG00000156110

DESCRIPTION Adenosine kinase (EC 2.7.1.20) (AK) (Adenosine 5'-phosphotransfrase). [Source:Uniprot/SWISSPROT;Acc:P55263]

AGCACTTAACAAGGGTGCTGATCTCTCCCATCTGAGGTCTTCTTTCTTCTTTTCATCTAATTTTAAGCACTGATCAGTG  
AATTCTTTCTCATTATTTTA

In100 candidate3371 (in intron):

LOCUS ENSG00000155827

DESCRIPTION E3 ubiquitin-protein ligase BRE1A (EC 6.3.2.-) (BRE1-A) (hBRE1)(RING finger protein 20). [Source:Uniprot/SWISSPROT;Acc:Q5VTR2]

AAGTAGACTACAAAAGTTTCCCATTTCTCATTTCTCAAAAGATAACCATTTCTAAACAATGTGTTTTATGTCCTCTCAGAC  
TTTTGTACTTTTGTATTAAT



In100 candidate3372 (in intron):

LOCUS ENSG00000156650

DESCRIPTION Histone acetyltransferase MYST4 (EC 2.3.1.48) (EC 2.3.1.-) (MYS protein 4) (MOZ, YBF2/SAS3, SAS2 and TIP60 protein 4) (Histone acetyltransferase MOZ2) (Monocytic leukemia zinc finger protein- related factor) (Histoe acetyltransferase MORF). [Source:Uniprot/SWISSPROT;Acc:Q8WYB5]

AGATTTGGAGATGATACATTATCACTGCAAATTTGACTATAAAGATAACTACTGTTGAAAGTGTGTATTTTCTTCCAGTC  
TTTTTTCCTTTTTTCCTACA

In100 candidate3373 (in intron):

LOCUS ENSG00000165194

DESCRIPTION Protocadherin-19 precursor. [Source:Uniprot/SWISSPROT;Acc:Q8TAB]

TGTGTGCATTGGTAACACTGTAACTGCTCTGTTCCCTTTCTTTTCCAGTAGAATTTCTTTTGTTTGGGATGACTGTTAC  
TTTTCCTTTTGGTCCTCTTT

In100 candidate3374 (in intron):

LOCUS ENSG00000198785

DESCRIPTION Glutamate [NMDA] receptor subunit 3A precursor (N-methyl-Daspatate receptor subtype NR3A) (NMDAR-L). [Source:Uniprot/SWISSPROT;Acc:Q8TCU5]

TCTTGAAAAAGTGTTTTTCTCTTACCTATAACAAGACTTTTCATAACATCTTTGACTTCTCCCTTTTCTTGTTACCAGGT  
TCTGTTGCTTTCCTTCATAT

In100 candidate3375 (in intron):

LOCUS ENSG00000116117

DESCRIPTION Partitioning-defective 3 homolog B (PAR3-beta) (Partitioningdeective 3-like protein) (PAR3-L protein) (Amyotrophic lateral sclerosis 2

chromosome region candidate gene 19 protein).

[Source:Uniprot/SWISSPROT;Acc:Q8EW8]

AAAAATTAAGAGGTATTAGTAAGAAATGTGTGGATTCTTCCTTCTCTTAACATTACTGTAGATCCTGTTTTATTTTCAGCT  
GTTTGTTCCCTTATCCTTAC

In100 candidate3376 (in intron):

LOCUS ENSG00000116117

DESCRIPTION Partitioning-defective 3 homolog B (PAR3-beta) (Partitioningdeective  
3-like protein) (PAR3-L protein) (Amyotrophic lateral sclerosis 2  
chromosome region candidate gene 19 protein).

[Source:Uniprot/SWISSPROT;Acc:Q8EW8]

AGTCAATAATTATTTGCTGAATGAATGCATAAACAAATCAAATTAACAAATTAACTCTAGATTTTCATCTTCTTCAGAA  
TTTTTTTTTTTCAGTGTTCCA

In100 candidate3377 (in intron):

LOCUS ENSG00000116117

DESCRIPTION Partitioning-defective 3 homolog B (PAR3-beta) (Partitioningdeective  
3-like protein) (PAR3-L protein) (Amyotrophic lateral sclerosis 2  
chromosome region candidate gene 19 protein).

[Source:Uniprot/SWISSPROT;Acc:Q8EW8]

GCATACAACCGCATTAAGAGATAGTGTTTTAACTGCACATATACTTAACCTATTTCTGTATTTATCTTCAGTTTTCAGT  
GTTTAAACCTGCCTGTTTCT

In100 candidate3378 (in intron):

LOCUS ENSG00000116117

DESCRIPTION Partitioning-defective 3 homolog B (PAR3-beta) (Partitioningdeective 3-like protein) (PAR3-L protein) (Amyotrophic lateral sclerosis 2 chromosome region candidate gene 19 protein).

[Source:Uniprot/SWISSPROT;Acc:Q8EW8]

TAGCTATTTTGATCTTAGTAAAATTTCCCACTTTTCTTCTATGTATAACCAAATATTTTTCTTTTATCTCACACAGTT  
TATTTTCTGTTTTTTGTTTT

In100 candidate3379 (in intron):

LOCUS ENSG00000116117

DESCRIPTION Partitioning-defective 3 homolog B (PAR3-beta) (Partitioningdeective 3-like protein) (PAR3-L protein) (Amyotrophic lateral sclerosis 2 chromosome region candidate gene 19 protein).

[Source:Uniprot/SWISSPROT;Acc:Q8EW8]

GAAACAAGATTAATTTAACGAAAATTGCTTCCACAATCTTTTCTGGAATCTTTTGTCTGTTACCCAGGCAATATC  
TATATTATTACTTTGTCCTC

In100 candidate3380 (in intron):

LOCUS ENSG00000116117

DESCRIPTION Partitioning-defective 3 homolog B (PAR3-beta) (Partitioningdeective 3-like protein) (PAR3-L protein) (Amyotrophic lateral sclerosis 2 chromosome region candidate gene 19 protein).

[Source:Uniprot/SWISSPROT;Acc:Q8EW8]

TTACTGTTTATATGGTAAGCATTTATTTTAACTGTTGCTTTTTCTCTTTGTTTCCTTTCTGAATATCTGTGTTTCCCAGAA

TACTTTTCCTTTTTCCTTA

In100 candidate3381 (in intron):

LOCUS ENSG00000116117

DESCRIPTION Partitioning-defective 3 homolog B (PAR3-beta) (Partitioning defective 3-like protein) (PAR3-L protein) (Amyotrophic lateral sclerosis 2 chromosome region candidate gene 19 protein).

[Source:Uniprot/SWISSPROT;Acc:Q8EW8]

CTTCTTTATTCTCCTGAAAATTACTTCTTTTATTTTATATTTAACAAGTTTTTATGTTTTTATTATTTTCTTACAGTT  
CTTTTTTTTTTTTTTTTACTT

In100 candidate3382 (in intron):

LOCUS ENSG00000101811

DESCRIPTION Cleavage stimulation factor 64 kDa subunit (CSTF 64 kDa subunit (CF-1 64 kDa subunit) (CstF-64). [Source:Uniprot/SWISSPROT;Acc:P33240]

TCAAGCCATTAGTAGTACTAACTGTGGCATTAGTCATTCCTGTCACTCTTTTCAGGAATTTTGAAGTTAGCGTATTTT  
CTCTTTTAACCTTTTGTTTC

In100 candidate3383 (in intron):

LOCUS ENSG00000158296

DESCRIPTION Solute carrier family 13 member 3 (Sodium-dependent high-affiniy dicarboxylate transporter 2) (Na(+)/dicarboxylate cotransporter 3) (NaDC-) (hNaDC3). [Source:Uniprot/SWISSPROT;Acc:Q8WWT9]

ATAAAATAAAACATAAATTGATAATTCTATGTACGCTGTTTTGTAACCTGCTATTTTCACATTTTTTTCTTCATTTTCAGTC  
TGTTTCCAAATACCTATTTT

In100 candidate3384 (in intron):

LOCUS ENSG00000165028

DESCRIPTION Protein NipSnap3B (SNAP1). [Source:Uniprot/SWISSPROT;Acc:Q9BS92]

ACTGCTAAGCTACATTATTGTAGTTTAACTTTTGTGTCTTCCTCTTTCTTGTTTCTCAGTTTGAAAAGATTTGTCTTCTT  
CCTGATTTCACTTCTTGCTC

In100 candidate3385 (in intron):

LOCUS ENSG00000114933

DESCRIPTION CDNA FLJ20309 fis, clone HEP07296.

[Source:Uniprot/SPTREMBL;AccQ9NXD5]

AGCATCCAAGTGCGTCTTTCCACACTTAACTTGAGAAGCACTGATTTAGTCCTTCCATTCTGCAGTAATAGCATCTTTTT  
TATTTTTTTCAGTTTTCATA

In100 candidate3386 (in intron):

LOCUS ENSG00000114933

DESCRIPTION CDNA FLJ20309 fis, clone HEP07296.

[Source:Uniprot/SPTREMBL;AccQ9NXD5]

AACATTTATAGATTTTTTAACTACAAAAGTAGTATTTTATGTTTATTTACATGTGTTATTTTAGTTTCTTTTCAGTGTTGG  
TTTTCATTTTTTTTGTTTTTA

In100 candidate3387 (in intron):

LOCUS ENSG00000114948

DESCRIPTION ADAM 23 precursor (A disintegrin and metalloproteinase domain 2)  
(Metalloproteinase-like, disintegrin-like, and cysteine-rich protein 3) (DC-3).

[Source:Uniprot/SWISSPROT;Acc:O75077]

CTGAAGTTAGATTTAGAGAAGATTTAAGCTCTAACAAGAGAAGCCAAGGTCATTCTTTCCAAATTTTCTCTCCACAGTG  
TTTCTGTGATTTTTTTTTTTA

In100 candidate3388 (in intron):

LOCUS ENSG00000102384

DESCRIPTION Centromere protein I (CENP-I) (Interphase centromere complex  
prtein 19) (Follicle-stimulating hormone primary response protein) (FSH primay  
response protein 1) (Leucine-rich primary response protein 1).

[Source:Unprot/SWISSPROT;Acc:Q92674]

TGTCCTTTCCTCTTCCATCTTTTACCATCTTCTGCCTTGAGATAACCATTTCTATTGCTTTTTGTGTTTTTCCATCCAGTG  
TTTTCCTTCTTTAAACTTA

In100 candidate3389 (in intron):

LOCUS ENSG00000102385

DESCRIPTION Dystrophin-related protein 2.

[Source:Uniprot/SWISSPROT;Acc:Q1374]

GGCCCTGCTGGGATCAACTTTGTGAGGGAAATGATTGCCAAGATGTTAACCCTTTACATACATTCATATTCTCAGTCTCT  
TCTTTTTTAAACCTAGTGGTC

In100 candidate3390 (in intron):

LOCUS ENSG00000148655

DESCRIPTION Uncharacterized protein C10orf11.

[Source:Uniprot/SWISSPROT;AccQ9H2I8]

TGCTTTTTATCATCAACTTGACTTCAACATAACTGTCCTCCTAGTTATTTTCTGTCTCGTTTTAATTGTTTTGTGCAGAA  
CTTTAGTTTCTTTGTCTTTT

In100 candidate3391 (in intron):

LOCUS ENSG00000148655

DESCRIPTION Uncharacterized protein C10orf11.

[Source:Uniprot/SWISSPROT;AccQ9H2I8]

AGATAGAGACATATTATATCTAACTTAATTGGATTTGTTTATTTCTGTTTATTTATTTCTCCTTGCAGTCCTAGTACTTT  
TTTGCCTCATGTATTTTGAT

In100 candidate3392 (in intron):

LOCUS ENSG00000156113

DESCRIPTION Calcium-activated potassium channel subunit alpha 1 (Calciumactivated  
potassium channel, subfamily M subunit alpha 1) (Maxi K channel) (Mak)  
(BK channel) (K(VCA)alpha) (BKCA alpha) (KCa1.1) (Slowpoke homolog) (Sl homolog)  
(Slo-alpha) (Slo1) (hSlo). [Source:Uniprot/SWISSPROT;Acc:Q12791]

EXON

CCAAAGACAAATTCTTCCAAGTTGGGTGGGGGAAAAAATCACCATTCTAACTTTGCTTCTGACTTTCAATCTTCAGAT  
TGCTTTTGCTTTCTAATCCT

In100 candidate3393 (in intron):

LOCUS ENSG00000124151

DESCRIPTION Nuclear receptor coactivator 3 (EC 2.3.1.48) (NCoA-3) (Thyroid hormone receptor activator molecule 1) (TRAM-1) (ACTR) (Receptor-associated coactivator 3) (RAC-3) (Amplified in breast cancer-1 protein) (AIB-1) (Steroid receptor coactivator protein 3) (SRC- [Source:Uniprot/SWISSPROT;Acc:Q9Y6Q] TTCAAAAAGTATTTTCTTAAGTCAACATTTCTTTTTTTTTTCTAGTATCAGAA GATTTTATTTTTTTACTTTT

In100 candidate3394 (in intron):

LOCUS ENSG00000124151

DESCRIPTION Nuclear receptor coactivator 3 (EC 2.3.1.48) (NCoA-3) (Thyroid hormone receptor activator molecule 1) (TRAM-1) (ACTR) (Receptor-associated coactivator 3) (RAC-3) (Amplified in breast cancer-1 protein) (AIB-1) (Steroid receptor coactivator protein 3) (SRC- [Source:Uniprot/SWISSPROT;Acc:Q9Y6Q] TGGTTTCTCACTGTTAACCAAGGTCTTTCTTTACCTTGGAAGCTTCTTTACTGCGTGTGTTCTCTGCTCCTGTCAGAT TGATTTTGTGTTAGTCCTTG

In100 candidate3395 (in intron):

LOCUS ENSG00000124151



DESCRIPTION Nuclear receptor coactivator 3 (EC 2.3.1.48) (NCoA-3) (Thyroid hormone receptor activator molecule 1) (TRAM-1) (ACTR) (Receptor-associated coactivator 3) (RAC-3) (Amplified in breast cancer-1 protein) (AIB-1) (Steroid receptor coactivator protein 3) (SRC- [Source:Uniprot/SWISSPROT;Acc:Q9Y6Q]

TAAAGGTAGATAAGGTTTTTTTTTGAAAAAATCCTTACTGCTAATAACCAAATACTTAAACCTTCTTGATTTCAGCATTT

TTAATGGAACTCTTCTTTCT

In100 candidate3396 (in intron):

LOCUS ENSG00000148143

DESCRIPTION Zinc finger protein 462. [Source:Uniprot/SWISSPROT;Acc:Q96JM2]

EXON

GCCTCTTATAACTTTAATATATTTATTACTTCTGCAATGATATTATTTTTGTCATCATTTTCTTTCTTCAACTGCCAGCC

TCTCTTTCATCTTGTGCTGA

In100 candidate3397 (in intron):

LOCUS ENSG00000144407

DESCRIPTION Parathyroid hormone receptor precursor (PTH2 receptor).

[SourceUniprot/SWISSPROT;Acc:P49190]

TGATAATAAATGTTAAATTAGAAAACAATGTAGCAACTTGATTATTAATAATTTTGATGTTTTTCTTTGTTTCCCAGTT

TCATATTCTTCTTGTTTTCT

In100 candidate3398 (in intron):

LOCUS ENSG00000078018

DESCRIPTION Microtubule-associated protein 2 (MAP 2) (MAP-2).

[Source:Uniprt/SWISSPROT;Acc:P11137]

TGGGGATGGAGAAAGCTCCCAACTACCATTCATTGTCTAACCTCATACCCTGCTTTATCTTCTTCATAGCAGTCATCATT

CTCTTAAGTATTTGTGTTCC

In100 candidate3399 (in exon):

LOCUS ENSG00000126947

DESCRIPTION Armadillo repeat-containing X-linked protein 1 (Protein ALEX1)  
ARM protein lost in epithelial cancers on chromosome X 1).

[Source:Uniprot/WISSPROT;Acc:Q9P291]

AGATGGCTGGGCTAAGACTGTTAACCAACATGACTGTGACTAATCATTACCAACATTTGCTTTCCTATTCTTTTCCAGAC  
TTTTTTGCTTTGTTATTCCT

In100 candidate3400 (in intron):

LOCUS ENSG00000144406

DESCRIPTION CDNA FLJ14677 fis, clone NT2RP2004095.

[Source:Uniprot/SPTREMBLAcc:Q96SS0]

TAGTTAGCAATTCCTCTAACCTTTTATCAAGGTTCTTAGCTTCTTTTCATTCCATTATAACATGCTCCTTTAGCTCAGTG  
TGGTTTTCTATTACCCATCT

In100 candidate3401 (in intron):

LOCUS ENSG00000144406

DESCRIPTION CDNA FLJ14677 fis, clone NT2RP2004095.

[Source:Uniprot/SPTREMBLAcc:Q96SS0]

AGTGGTGTCAAATTTTGTTTAGATGTTACCTGTAAGTGTGCCTCTGATACTCTGTGGTTCTTTTCAGCTATGCGGCATT  
CTTCTGATTCATTTTTCTCC

In100 candidate3402 (in intron):

LOCUS ENSG00000197713

DESCRIPTION Ribulose-phosphate 3-epimerase (EC 5.1.3.1) (Ribulose-5-phosphate-3-epimerase). [Source:Uniprot/SWISSPROT;Acc:Q96AT9]

ACTAGCCAAAGTTGGTCAATACCACTCTCCACGTCTTTGACTGTAAGTGTGTTATTTCTGCTTTTGCTTCATTTTCAGCC  
TTTGTTTCTTTTCCCATCTT

In100 candidate3403 (in intron):

LOCUS ENSG00000144445

DESCRIPTION CDNA FLJ32349 fis, clone PROST2007237.

[Source:Uniprot/SPTREMBLAcc:Q96MI0]

TAGTGTTACAATAATACTAGCTGTTATAATTATGCATGTATTTAACTTCATTGAGATTTTCTTTTCATCATACAGCTTTA  
AGTTACTATCTACGTCTTTC

In100 candidate3404 (in intron):

LOCUS ENSG00000115365

DESCRIPTION LanC-like protein 1 (40 kDa erythrocyte membrane protein) (p40)

[Source:Uniprot/SWISSPROT;Acc:O43813]

AGTAGACACCATGCCAAAAATAATAAAATAACTGCCTTTCCTCATCTTTACATTGTTTCCTTTTTTTTTTTTTCAGGTATT  
GCTGTGCTTTACTTACATCT

In100 candidate3405 (in intron):

LOCUS ENSG00000115365

DESCRIPTION LanC-like protein 1 (40 kDa erythrocyte membrane protein) (p40)

[Source:Uniprot/SWISSPROT;Acc:O43813]

AGAACAAAGATTTAGTGTGCGAAAGCTACCTGATAACATTTGTTAGGGCTAATGTCGTCTCATTACTACTTTCTTCCAGAG  
TTTCATTGGCTCTTTGTGCT

In100 candidate3406 (in intron):

LOCUS ENSG00000021826

DESCRIPTION Carbamoyl-phosphate synthase [ammonia], mitochondrial  
precursor(EC 6.3.4.16) (Carbamoyl-phosphate synthetase I) (CPSase I).

[Source:Unipro/SWISSPROT;Acc:P31327]

GATTCACAATGCCTACACCTTCTATTTTCTAACAAACTCTTGAATTTAATTGCGCCTTTTCCTCTTTCCCAGTGTCTTTA  
AGTTCACAATCCTTTCACTT

In100 candidate3407 (in intron):

LOCUS ENSG00000178568

DESCRIPTION Receptor tyrosine-protein kinase erbB-4 precursor (EC  
2.7.10.1)(p180erbB4) (Tyrosine kinase-type cell surface receptor HER4).

[Source:Unipot/SWISSPROT;Acc:Q15303]

TTCCTTTGTTTCATGCTTTTCTTCCTTCTTTGAGATTAACGAAAATTTTTTTTTTCTATTTCTCTATAGGCTTTTTCAGGA  
TCTCTTTTTTGTATTATTTTT

In100 candidate3408 (in intron):

LOCUS ENSG00000178568

DESCRIPTION Receptor tyrosine-protein kinase erbB-4 precursor (EC  
2.7.10.1)(p180erbB4) (Tyrosine kinase-type cell surface receptor HER4).

[Source:Unipot/SWISSPROT;Acc:Q15303]

AACTGTTTCTCATTATTAGCTGTAAGTAATAACACTAATCCCTTTCTTTTCTTTTCAGTCTTCTTTAATGAATATGTGTT  
TAACTTCACTCTCATCTTCC

In100 candidate3409 (in intron):

LOCUS ENSG00000178568

DESCRIPTION Receptor tyrosine-protein kinase erbB-4 precursor (EC  
2.7.10.1)(p180erbB4) (Tyrosine kinase-type cell surface receptor HER4).

[Source:Unipot/SWISSPROT;Acc:Q15303]

TTTCTTTTCTTTTTTTAAACTCCTTTTCTCTCTGAGAAAAAATAACTGAACTTCCTTTCCCTCTTATGATATTTTCAGTT  
CCATATAAATATTTCTTCCT

In100 candidate3410 (in intron):

LOCUS ENSG00000165424

DESCRIPTION Zinc finger CCHC domain-containing protein C10orf56.

[Source:Unprot/SWISSPROT;Acc:Q8N2G6]

ACCACTTTTTGTTCTACATTAATAAATAACAATGGCATTAATATTCCTGTTTTGTCTTCTGTGTGCCAGGCACTGTTCTA  
AATGTTTTGCATTTACTCCT

In100 candidate3411 (in intron):

LOCUS ENSG00000144451

DESCRIPTION Sperm-associated antigen 16 protein (PF20 protein homolog).

[Sorce:Uniprot/SWISSPROT;Acc:Q8N0X2]

AATTCAACTATTCTGACAATATATTAATACTAACCCCAAATCTTCTGGTCATTCTTCAGCAAGTGTCCAGTTTGTAGGAA  
TTTTTTTTTTTTTTTTTTTTTTT

In100 candidate3412 (in intron):

LOCUS ENSG00000144451

DESCRIPTION Sperm-associated antigen 16 protein (PF20 protein homolog).

[Sorce:Uniprot/SWISSPROT;Acc:Q8N0X2]

AACCTACCCTTAAGGGTAACTGTTGCACTATCTTTAGTCTTTCTGATTCCAGGTCTCTTCCCATTTTTCTCTGACTTGTG  
TGAAATATATACACTTTCCT

In100 candidate3413 (in intron):

LOCUS ENSG00000144451

DESCRIPTION Sperm-associated antigen 16 protein (PF20 protein homolog).

[Sorce:Uniprot/SWISSPROT;Acc:Q8N0X2]

ATGTCTGAAATAACTTTCTTCTGCCTGTTCTGACCTTTGTTGTCTCACTTTAACTCATCATCCAGCTGCTGCCTGAGTAT  
TTTGCTTTAATCTATTCTCT

In100 candidate3414 (in intron):

LOCUS ENSG00000144451

DESCRIPTION Sperm-associated antigen 16 protein (PF20 protein homolog).

[Sorce:Uniprot/SWISSPROT;Acc:Q8N0X2]

GAGGGAAGGGAGGAAAAAAGAATCTGTCTTACCATGGTGTTTCTTCTAACTCAAGAACTTGTGTCATGTTCTTCAGAT  
ATACCTATTTCACTTTTAT

In100 candidate3415 (in intron):

LOCUS ENSG00000144451

DESCRIPTION Sperm-associated antigen 16 protein (PF20 protein homolog).

[Sorce:Uniprot/SWISSPROT;Acc:Q8N0X2]

ATAATGTGATTTCCCTTAGTTCCCAAATCCCAAATTCCTACTATTACTAACCTGCCTGACAATTTCTTCTCTTCAGAC  
TTATTATCTTCTAGTACATT

In100 candidate3416 (in intron):

LOCUS ENSG00000144451

DESCRIPTION Sperm-associated antigen 16 protein (PF20 protein homolog).

[Sorce:Uniprot/SWISSPROT;Acc:Q8N0X2]

ACTGTTGGTTTAATCTCTCTTATGTAACATAAGAAAAGCTACTCCTGTTCACTTTTGTTTTTCTTTTGTATGATACAGCT  
TTTTCTACCACTTTACTTTA

In100 candidate3417 (in intron):

LOCUS ENSG00000185554

DESCRIPTION Nuclear RNA export factor 2 (TAP-like protein 2) (TAPL-2).

[Souce:Uniprot/SWISSPROT;Acc:Q9GZY0]

GGTTTGTCTCATTTGTTTAACTTTTCACAAAATCAACTTTCTGTTTCAGTGATTGTTTCAGTGTATTGTTTTCTTCAGTTC  
AATTTCATTTATTTCTGCTC

In100 candidate3418 (in intron):

LOCUS ENSG00000144452

DESCRIPTION ATP-binding cassette sub-family A member 12 (ATP-binding cassete

transporter 12) (ATP-binding cassette 12). [Source:Uniprot/SWISSPROT;Acc:86UK0]  
TTAATAAAGATAAAGTCTAACTCTAGCTGCATTACCTTACTTGTGAGTTTACAACCTCTTCCCTTGATTTCTCTCCAGGTC  
CTGAATACATGTTTTCTCT

In100 candidate3419 (in intron):

LOCUS ENSG00000144452

DESCRIPTION ATP-binding cassette sub-family A member 12 (ATP-binding cassette  
transporter 12) (ATP-binding cassette 12). [Source:Uniprot/SWISSPROT;Acc:86UK0]  
TATACACGCTTGCACTAGGAGAGAGGAAGGGGAGAGAGAGAGAATGAATTAACCTTTATTTTTCTCTTGGCTTACCAGGC  
ATTAATGGCTTTATTTTCCC

In100 candidate3420 (in intron):

LOCUS ENSG00000106771

DESCRIPTION Uncharacterized protein C9orf5 (Protein CG-2).

[Source:Uniprot/WISSPROT;Acc:Q9H330]

AGATTATTTGTATTGATAGATTTGACCAAATAACGTAGGAGATAGTTTTTTCTGTCTTTTTTAGTAATCCCATCAGTT  
CTTTTTTCTTCATGCTCTGA

In100 candidate3421 (in intron):

LOCUS ENSG00000185945



DESCRIPTION Nuclear RNA export factor 2 (TAP-like protein 2) (TAPL-2).

[Source:Uniprot/SWISSPROT;Acc:Q9GZY0]

GGTTTGTCTCATTTGTTTAACTTTTCACAAAATCAACTTTCTGTTTCAGTGATTGTTTCAGTGTATTGTTTTCTTCAGTTC  
AATTTCATTTATTTCTGCTC

In100 candidate3422 (in intron):

LOCUS ENSG00000157654

DESCRIPTION Paralemmin-2. [Source:Uniprot/SWISSPROT;Acc:Q8IXS6]

ACTATAAAATTCTCTCTAGTCGTTAGTTTAGCTGCCTCTCATAATTGTAACACACTGTGTTATCATTTTCATTCAGTTTTA  
AATATTTTCCAAATTCCTTT

In100 candidate3423 (in intron):

LOCUS ENSG00000165124

DESCRIPTION polydom [Source:RefSeq\_peptide;Acc:NP\_699197]

ACAACATAAGAAAATGTTTGTAGTATCTGAAATCCTCAAAGGAACCTAACTAACTGTTTTTTCTCTTTTCTCCATCAGCT  
TTTTCTTTGTAACTGTCTT

In100 candidate3424 (in intron):

LOCUS ENSG00000177410

DESCRIPTION C20orf199 protein (Fragment). [Source:Uniprot/SPTREMBL;Acc:Q8N53]

AGTTAAAACTTTGAAGAGAAATCCATTGTATCTAACGATTTCCCCCTTTTGATTTTTATAATTATTTCTCTTCAGACTTG  
TTTTAGCGTGTCTTGATTTT

In100 candidate3425 (in intron):

LOCUS ENSG00000158470

DESCRIPTION Beta-1,4-galactosyltransferase 5 (EC 2.4.1.-) (Beta-1,4-GalTase5)  
(Beta4Gal-T5) (b4Gal-T5) (UDP-galactose:beta-N-acetylglucosamine beta- 14-

galactosyltransferase 5) (UDP-Gal:beta-GlcNAc beta-1,4- galactosyltransfease 5)  
(Beta-1,4-GalT II). [Source:Uniprot/SWISSPROT;Acc:O43286]

TAATCCCCATTTTGATTCTATTTTATTCCCTGGAAGTAACCATTTCTTCCGTACTTTTCTTTTCTTTTTTGAGACAGAT  
TTTCTTTCTGTTACCCAAGC

In100 candidate3426 (in intron):

LOCUS ENSG00000198121

DESCRIPTION Lysophosphatidic acid receptor Edg-2 (LPA receptor 1) (LPA-1).

Source:Uniprot/SWISSPROT;Acc:Q92633]

TGATCTTTTTCTCTTTGTTTTGTGGATGAGTAAATTAACATTCCCTCCCATTCTTCCTCTCTCTCTTAATGGCTCAGAC  
TGAATTCAATTTCTTTCTTT

In100 candidate3427 (in exon):

LOCUS ENSG00000079246

DESCRIPTION ATP-dependent DNA helicase 2 subunit 2 (EC 3.6.1.-) (ATP-dependnt  
DNA helicase II 80 kDa subunit) (Lupus Ku autoantigen protein p86) (Ku86 (Ku80)  
(86 kDa subunit of Ku antigen) (Thyroid-lupus autoantigen) (TLAA) (TC boxbinding  
factor 85 kDa subunit) ( [Source:Uniprot/SWISSPROT;Acc:P1301]

TCCTTTACTAAATAAGAAAATAACAAAGCCCTTATTCTCTTTTTTTTCTTGTCTCATTCCTTGAGTTCCAGTTCCT  
CTTTGGTGTACAGACTTCTT

In100 candidate3428 (in intron):

LOCUS ENSG00000185737

DESCRIPTION Pro-neuregulin-3, membrane-bound isoform precursor (Pro-NRG3)  
[ontains: Neuregulin-3 (NRG-3)]. [Source:Uniprot/SWISSPROT;Acc:P56975]

TTTTCTTTAGCTGAGGAAAGTTATTTTTCATTTTTTCTATGGTAACTGCACTTGTTCCATTTTGCTGTCTTTTTCAGAT  
TTCTTTCTTATGTGAATTTG

In100 candidate3429 (in intron):

LOCUS ENSG00000185737

DESCRIPTION Pro-neuregulin-3, membrane-bound isoform precursor (Pro-NRG3)  
[ontains: Neuregulin-3 (NRG-3)]. [Source:Uniprot/SWISSPROT;Acc:P56975]

TCTCTTAATAATAACAAAATGACTATTAATTTAACTCTGAATATGACTTTGAATATTTTCTCTTTGTGCAGCCTAAGAT  
TGCTGCATTTGTCTTCTTTC

In100 candidate3430 (in intron):

LOCUS ENSG00000185737

DESCRIPTION Pro-neuregulin-3, membrane-bound isoform precursor (Pro-NRG3)  
[ontains: Neuregulin-3 (NRG-3)]. [Source:Uniprot/SWISSPROT;Acc:P56975]

ACTGTGGCTTTAAGACTCAATAGAAGAATCAAATTAACATCTGAAAAATATTTCTTACCAAGCTTTCATTTCCAGTATTA  
CCCTGGTAATTTGTTTTTCT

In100 candidate3431 (in intron):

LOCUS ENSG00000185737

DESCRIPTION Pro-neuregulin-3, membrane-bound isoform precursor (Pro-NRG3)  
[ontains: Neuregulin-3 (NRG-3)]. [Source:Uniprot/SWISSPROT;Acc:P56975]

TTATATTATCTGTTATATTTACCTATGTACTTTAACTAGTGCTTTTATTTCTTCTTGTGGATTGACTTCCTGTCCAGTA

TTCCCCCTTTTATTAGGT

In100 candidate3432 (in intron):

LOCUS ENSG00000185737

DESCRIPTION Pro-neuregulin-3, membrane-bound isoform precursor (Pro-NRG3)

[ontains: Neuregulin-3 (NRG-3)]. [Source:Uniprot/SWISSPROT;Acc:P56975]

TAATACCTACCTTGATCTTTTATTAACCTCATAAGCATCTTTAGTCCTTTGATCCCTCTTTTTTTAATACCATAACCAGCA

ACCTTAACATTTTCCTTTCT

In100 candidate3433 (in intron):

LOCUS ENSG00000185737

DESCRIPTION Pro-neuregulin-3, membrane-bound isoform precursor (Pro-NRG3)

[ontains: Neuregulin-3 (NRG-3)]. [Source:Uniprot/SWISSPROT;Acc:P56975]

TTTAAATCCATGGTAACAAAATAACTCACTGCTTTGTTTTCTGTTTCCTTTTCTGGTCTTCAAATCAGAAGCTGCTGTT

ATAGTTTTCTTTTATATTTT

In100 candidate3434 (in intron):

LOCUS ENSG00000185737

DESCRIPTION Pro-neuregulin-3, membrane-bound isoform precursor (Pro-NRG3)

[ontains: Neuregulin-3 (NRG-3)]. [Source:Uniprot/SWISSPROT;Acc:P56975]

TTTAATCGTTTTTGTGGTTTCTCATTAGAGAATAGGTAAATAATGAAATAACTAGAGTCTTCCCTTGCTTTCATTCAGTT

TTGTGTTGTTCTTTCCTTCC

In100 candidate3435 (in intron):

LOCUS ENSG00000136813

DESCRIPTION Proteasome-associated protein ECM29 homolog (Ecm29).

[Source:Unprot/SWISSPROT;Acc:Q5VYK3]

GGCCTTGGAGAGTAATCTTATTAACATTTATGTATGTCTGACTCATCTTTGTCAAATTTTACATTTTCTGCTATCAGCT  
TCAGGTCTTGTATTTTATTT

In100 candidate3436 (in intron):

LOCUS ENSG00000136813

DESCRIPTION Proteasome-associated protein ECM29 homolog (Ecm29).

[Source:Unprot/SWISSPROT;Acc:Q5VYK3]

ATGCTGCTGTAAATTTATATTCACCTCAATTGGGTCCTTTACACTTTCTTCACATTTGTAGTTCATTTTACCAGTC  
AATTTTCTTCTCTTCTTCTCAC

In100 candidate3437 (in intron):

LOCUS ENSG00000107771

DESCRIPTION granule cell antiserum positive 14

[Source:RefSeq\_peptide;Acc:N\_061872]

TTAGTGATCTTCTCTATCTCTAACTATGCTTTTTGTTTTTCACACTCCTTTTTTTCCAAATATTAATATACCTTACCAGTT  
TTATTTATATATTTTCTCTT

In100 candidate3438 (in intron):

LOCUS ENSG00000182771

DESCRIPTION Glutamate receptor delta-1 subunit precursor (GluR delta-1).

[Source:Uniprot/SWISSPROT;Acc:Q9ULK0]

CTGTCTTCTGTCTGTTCAAATCTGCTCTTTAACCCCCTAATGAATTTTTCATTTTGTTATTGTACTTTTGTAGCCCCAGAA

TTTCTGTTTGCTTCTTTTAA

In100 candidate3439 (in intron):

LOCUS ENSG00000062650

DESCRIPTION Wings apart-like protein homolog (Friend of EBNA2 protein).

[Source:Uniprot/SWISSPROT;Acc:Q7Z5K2]

AGTGGGGGATAACATGTCATTTCTCTTAGATTTTCAGGAAGGAATGCTTTCTTTCCTCTGTTTTTGTTGTTGTTGTTTT  
GTTTTTTTTTGTTTGTTTTTG

In100 candidate3440 (in intron):

LOCUS ENSG00000196396

DESCRIPTION Tyrosine-protein phosphatase non-receptor type 1 (EC 3.1.3.48)

Protein-tyrosine phosphatase 1B) (PTP-1B). [Source:Uniprot/SWISSPROT;Acc:P1031]

GAATTTGTACTCACTGCTGAATGCTTCCAAATGATACGTAGAATAACAAATTTAAGACTTAGATTTTTACTTTTTTCAGGT  
CTTTTTTTTTTTTTTCTGTGC

In100 candidate3441 (in intron):

LOCUS ENSG00000189108

DESCRIPTION X-linked interleukin-1 receptor accessory protein-like 2 precursor  
(IL1RAPL-2-related protein) (Interleukin-1 receptor 9) (IL-1R9) (IL-1 reeptor

accessory protein-like 2) (Three immunoglobulin domain- containing IL1  
receptorrelated

1) (TIGIRR-1). [Source:Uniprot/SWISSPROT;Acc:Q9NP60]

CCTTAGCAAATCTAGCCAATTCTTTTTCAATTCTATGACTTAACATTACCTTTTCTTTTGTGTTTTATTAGCGTTCAGGT  
TTTAGACTATTTGTTTCCAC

In100 candidate3442 (in intron):

LOCUS ENSG00000189108

DESCRIPTION X-linked interleukin-1 receptor accessory protein-like 2 precursor  
(IL1RAPL-2-related protein) (Interleukin-1 receptor 9) (IL-1R9) (IL-1 reeptor  
accessory protein-like 2) (Three immunoglobulin domain- containing IL1  
receptorrelated

1) (TIGIRR-1). [Source:Uniprot/SWISSPROT;Acc:Q9NP60]

GGAATCATGCTTTTTATTGAAATTGTTGGTAATTTTATTTGTATGTATTAACCTGAACATTGATTATTTTGCTACCCAGAA  
TCTATTCACCTTTCTTTTGTG

In100 candidate3443 (in intron):

LOCUS ENSG00000189108

DESCRIPTION X-linked interleukin-1 receptor accessory protein-like 2 precursor  
(IL1RAPL-2-related protein) (Interleukin-1 receptor 9) (IL-1R9) (IL-1 reeptor  
accessory protein-like 2) (Three immunoglobulin domain- containing IL1  
receptorrelated

1) (TIGIRR-1). [Source:Uniprot/SWISSPROT;Acc:Q9NP60]

AATTGCTTTGGGCAATGTGACCATTTTAACAATGTTGATTCTTCTTATCCATCAGCATGGAATGCTTTTCCATTTGTTTG  
TGTCATCTCTGATTTCTTCC

In100 candidate3444 (in intron):

LOCUS ENSG00000189108

DESCRIPTION X-linked interleukin-1 receptor accessory protein-like 2 precursor (IL1RAPL-2-related protein) (Interleukin-1 receptor 9) (IL-1R9) (IL-1 reeptor accessory protein-like 2) (Three immunoglobulin domain- containing IL1 receptorrelated

1) (TIGIRR-1). [Source:Uniprot/SWISSPROT;Acc:Q9NP60]

TCAC TTATTATGTTAACCATATAGTCTTCTATTTTTTCATAATACTTATCAGAATTTTAATTTTGTATTTTGATATTTAT  
TTGTTTAGTGTTTGTCTTTC

In100 candidate3445 (in intron):

LOCUS ENSG00000189108

DESCRIPTION X-linked interleukin-1 receptor accessory protein-like 2 precursor (IL1RAPL-2-related protein) (Interleukin-1 receptor 9) (IL-1R9) (IL-1 reeptor accessory protein-like 2) (Three immunoglobulin domain- containing IL1 receptorrelated

1) (TIGIRR-1). [Source:Uniprot/SWISSPROT;Acc:Q9NP60]

TGATACATAGAAAAAAATTACCATAAACTCTTAACCCTAATGTGAGCATTATAACTGTTTGATTATTTTCCTTCCAGCC  
TTTTAAGGCCTATTTTATTT

In100 candidate3446 (in intron):

LOCUS ENSG00000189108

DESCRIPTION X-linked interleukin-1 receptor accessory protein-like 2 precursor (IL1RAPL-2-related protein) (Interleukin-1 receptor 9) (IL-1R9) (IL-1 reeptor accessory protein-like 2) (Three immunoglobulin domain- containing IL1 receptorrelated



1) (TIGIRR-1). [Source:Uniprot/SWISSPROT;Acc:Q9NP60]

AGAGTGATAACTTCTCAATTACTATTTCTGTGGTGTGTTTTTTGTTTCATTTTGTTTTTGCAGATTTCACTGCTTATTTTT  
TCCCCTGAATGCATAATCTC

In100 candidate3447 (in intron):

LOCUS ENSG00000135913

DESCRIPTION Ubiquitin carboxyl-terminal hydrolase 37 (EC 3.1.2.15) (Ubiquitin  
thioesterase 37) (Ubiquitin-specific-processing protease 37) (Deubiquitinating  
enzyme 37). [Source:Uniprot/SWISSPROT;Acc:Q86T82]

CTGAGCCATCCTGCCTTGTACTGTGGGTGTTTTGAAATTTTGTAGGTAGATAACTTTTACTATCTTTTCCTATGACCAGTT  
CAAATTTTCTCTCTTGATA

In100 candidate3448 (in intron):

LOCUS ENSG00000107779

DESCRIPTION Bone morphogenetic protein receptor type IA precursor (EC  
2.7.1.30) (Serine/threonine-protein kinase receptor R5) (SKR5) (Activin  
receptorlike kinase 3) (ALK-3) (CD292 antigen).

[Source:Uniprot/SWISSPROT;Acc:P3689]

AGTAACTTGATTTTATACTTGGCTTTCTATATTGTGGCTCCAATTTTCTTCCCAGTTTATACTCTTATTTTTCCTTTCT  
TTTTCTTTTCTTTTCTTTT

In100 candidate3449 (in intron):

LOCUS ENSG00000157502

DESCRIPTION MUM1-like protein 1 (Mutated melanoma-associated antigen 1-  
likeprotein 1). [Source:Uniprot/SWISSPROT;Acc:Q5H9M0]

AGCTTCTGCTTTTAACTGGGTACATATTCTTAACTATATCATTATCTCCAGATTGTAGCATTTTGTTTTCTACTTCTTTC  
TTCCTCCCCATTTCTTCCT

In100 candidate3450 (in intron):

LOCUS ENSG00000106868

DESCRIPTION Sushi domain-containing protein 1 precursor.

[Source:Uniprot/SWSSPROT;Acc:Q6UWL2]

ATTCTTTAACATCTTTAAAATTGTATTTACTAATCCCTAAATCCCCATTTTCTTTTTTCCTTTTTTCAGGTTTCTTATAT  
TAAAATTCTAGTGTTTTCTT

In100 candidate3451 (in intron):

LOCUS ENSG00000106868

DESCRIPTION Sushi domain-containing protein 1 precursor.

[Source:Uniprot/SWSSPROT;Acc:Q6UWL2]

CAAGTTAATCTAGAGAGAATTAGGATTTATGTTGAGCCATCCTAACTGGGAGCAAGGTATGTTTCCACATTTACTCAGTG  
TCTACTCAGGTCTTCTGTTT

In100 candidate3452 (in intron):

LOCUS ENSG00000106868

DESCRIPTION Sushi domain-containing protein 1 precursor.

[Source:Uniprot/SWSSPROT;Acc:Q6UWL2]

CTTTGCCTATATTCCACTTCATTCACCTTTATTTTTGACCCTTTTAACTTCTTTTTGATCTCATTTTTATTATTTTCAGTT  
GTTTTCCTATATTCTTCAA

In100 candidate3453 (in intron):

LOCUS ENSG00000101096

DESCRIPTION Nuclear factor of activated T-cells, cytoplasmic 2 (T cell transcription factor NFAT1) (NFAT pre-existing subunit) (NF-ATp).

[Source:Unipro/SWISSPROT;Acc:Q13469]

TGAGATTTGGGTGTGTTTTGGTGTGTGCTGCCTTCAAGTAACATTCTGGACTCTCTTTTGTCTCTGAACCAGTTCAACTT  
TGTTTTAGCACCAATTTTCC

In100 candidate3454 (in intron):

LOCUS ENSG00000119314

DESCRIPTION Regulator of differentiation 1 (Rod1).

[Source:Uniprot/SWISSPRO;Acc:O95758]

CCCATATAAGAGTTTTTGTCAACCCACATTATTACTAACATGATATTGTCCATCTTTTAAATTTACAGTATTCATTGT  
GGTTTTAACTTGCATTTCCC

In100 candidate3455 (in intron):

LOCUS ENSG00000115649

DESCRIPTION Uncharacterized protein C2orf24.

[Source:Uniprot/SWISSPROT;Acc:9BV87]

CCCTGGCCCATCTTTAACCGTCCTTTAGTCCTTTGTTCTCTCTCAGTCTTCTGTTGGTTCGTCATTTCTCTTCCTGTCCT  
CCTCCTGCCTTTGTGTTAGT

In100 candidate3456 (in intron):

LOCUS ENSG00000020256

DESCRIPTION Zinc finger protein 64, isoforms 3 and 4 (Zinc finger protein 38). [Source:Uniprot/SWISSPROT;Acc:Q9NTW7]

AATAACATTCTAAGTCTTATTTTGTATTTTTTTTTCATTTGCCTGGTTCATATCTGCCCATTCCTGTTATTCAGTATCTTT  
CTTTATCAGCCTCTCCTTGT

In100 candidate3457 (in intron):

LOCUS ENSG00000089682

DESCRIPTION RNA-binding protein 41 (RNA-binding motif protein 41).

[Source:niprot/SWISSPROT;Acc:Q96IZ5]

GCCTCTCTCATCTAACCCTTTCTTTCCATTTTCACTATTACCATTTTCAGTCTAGACCTTCATCACCTTTTACTTCAGTAG  
TTTCATAACTAGTTCTTCTT

In100 candidate3458 (in intron):

LOCUS ENSG00000089682

DESCRIPTION RNA-binding protein 41 (RNA-binding motif protein 41).

[Source:niprot/SWISSPROT;Acc:Q96IZ5]

TTCATCTGTCTAAACCATCACTTGCACTGTGTCACTTAACTGTTTGATAAATTACTACTTCTTATTATCCTTCAGTATAT  
ATTACTATCCCTTTGTACTC

In100 candidate3459 (in intron):

LOCUS ENSG00000165185

DESCRIPTION Uncharacterized protein KIAA1958.

[Source:Uniprot/SWISSPROT;AccQ8N8K9]

ATTCTTGGTTTTCTTCAAACTGATACTGCTTTAACCTTTTCTGTCCTTTTTTAATTGCAAATATTCTGTCCCTTCAGTT  
TTTTCTTATATTTTCCTCTG

In100 candidate3460 (in intron):

LOCUS ENSG00000138138

DESCRIPTION ATPase family AAA domain-containing protein 1.

[Source:Uniprot/WISSPROT;Acc:Q8NBU5]

CCTCCTAAAGTGCTGGGATTATAACGCCTAGCTGATTTACTTCTGCTATATTATTTTTTGCTTTTAATTTACCAGTCTAG  
TAGACTTTTTTGCTTTATTC

In100 candidate3461 (in intron):

LOCUS ENSG00000138138

DESCRIPTION ATPase family AAA domain-containing protein 1.

[Source:Uniprot/WISSPROT;Acc:Q8NBU5]

ATTATGCATTTTGAGTAAAAATCTGATGTAAGTACTAGAACTACATTAGCTTTCTTTTTATTAATCGTTGATGTCTTTCAGTC  
TTTTACTTCCTGCTTTTCTT

In100 candidate3462 (in intron):

LOCUS ENSG00000198088

DESCRIPTION Nucleoporin-62 C-terminal-like protein.

[Source:Uniprot/SWISSPRT;Acc:Q9H1M0]

TTGTCATGCTTTTCTCCCTTATTCTTCACATAACTAAGTATGTACCTGTATTTATTTTTCTGTTCACTTACTAGCCAGTT  
CATTCTTCTTTTTACATATT

In100 candidate3463 (in intron):

LOCUS ENSG00000171862

DESCRIPTION Phosphatidylinositol-3,4,5-trisphosphate 3-phosphatase and dual

specificity protein phosphatase PTEN (EC 3.1.3.67) (EC 3.1.3.16) (EC 3.1.348)  
(Phosphatase and tensin homolog) (Mutated in multiple advanced cancers ).

[Source:Uniprot/SWISSPROT;Acc:P60484]

TATTAAACTTGTATGTTTTAAAAGCTTATTTACTTGTTGAAATGGTTAACTTAATTAGTTTTTTCTTTGAAGTTTCAGCC  
TAAATATTTTCTGTTTTTTT

In100 candidate3464 (in intron):

LOCUS ENSG00000171862

DESCRIPTION Phosphatidylinositol-3,4,5-trisphosphate 3-phosphatase and dual  
specificity protein phosphatase PTEN (EC 3.1.3.67) (EC 3.1.3.16) (EC 3.1.348)  
(Phosphatase and tensin homolog) (Mutated in multiple advanced cancers ).

[Source:Uniprot/SWISSPROT;Acc:P60484]

ATCATTTACAATTAAAGTAATTATTGATAAGGATTTAACTGCTGCCATTTTGCTGTTTATTTTCTATATGCCTTACAGCT  
TTTTTGTCCTCATTTTCCTG

In100 candidate3465 (in intron):

LOCUS ENSG00000184719

DESCRIPTION Renalase precursor (EC 1.4.--).

[Source:Uniprot/SWISSPROT;Acc:5VYX0]

ATAAGGTTTTGTAATAGAAATGCAATTGCAATATAAGTAATTAAGTATGTCTCTTAAATCTCTTTTATTCTACAGGT  
TTTTTTTCTCATTTTTCCTG

In100 candidate3466 (in intron):

LOCUS ENSG00000184719

DESCRIPTION Renalase precursor (EC 1.4.--).

[Source:Uniprot/SWISSPROT;Acc:5VYX0]

CATTCTTTGAAATGTGCTTTCCCTGCTCCTACCCCATTTTAACTAGACCCTCTCTTTTCTGTATCTTATTGCTCCAGTC  
CTATTCAATTTGGATTCTCT

In100 candidate3467 (in intron):

LOCUS ENSG00000136866

DESCRIPTION Zinc finger protein 37 homolog (Zfp-37).

[Source:Uniprot/SWISSPOT;Acc:Q9Y6Q3]

ATTCACCATGAGTAGTATAAAGTGGATAACCTTTCCTATTTATTCTCTTAGCCACTTATCAGCTCATCAGTACTTCTTGG  
TGGACTIONACTTTATTTTCT

In100 candidate3468 (in intron):

LOCUS ENSG00000157514

DESCRIPTION TSC22 domain family protein 3 (Glucocorticoid-induced leucine  
zpper protein) (Delta sleep-inducing peptide immunoreactor) (DSIP- immunoreactive  
peptide) (Protein DIP) (hDIP) (TSC-22-like protein) (TSC-22R).

[SourceUniprot/SWISSPROT;Acc:Q99576]

TTCAACCATCCCATTAACACTGTGTAAACGCTCTAGTGCTCAATATCCTTTTTGTATTTCCCTTTCCAGCTCCTAACCCA  
GTGTTTGCTTTGTGGCTTCT

In100 candidate3469 (in intron):

LOCUS ENSG00000101134

DESCRIPTION Docking protein 5 (Downstream of tyrosine kinase 5) (IRS6)



(Protein dok-5). [Source:Uniprot/SWISSPROT;Acc:Q9P104]

AGTTGTTAACGATCTTATTGCCTGTCCCCTTTGCTTTTCTCTTCTCTATTTGTCAGGTTTTTTTTTTTTTTTTTTTTTTTA  
CTTTCATGTTATTCAATACC

In100 candidate3470 (in exon):

LOCUS ENSG00000148229

DESCRIPTION DNA polymerase epsilon subunit 3 (EC 2.7.7.7) (DNA polymerase I  
subunit 3) (DNA polymerase epsilon subunit p17) (Chromatin accessibility complex  
17) (HuCHRA17) (CHRA17) (Arsenic- transactivated protein) (AsTP).

Source:Uniprot/SWISSPROT;Acc:Q9NRF9]

CTCCCTAAACCATCCTCTTTAACTGCTTCTAAAATATCTCTGTTGGCCTTTCTTAGCCTTTTTCTGTTTCCATTCAGTGC  
TCCAAGCGCTTTTTGTTTCT

In100 candidate3471 (in intron):

LOCUS ENSG00000087586

DESCRIPTION Serine/threonine-protein kinase 6 (EC 2.7.11.1) (Aurora kinase )  
(Aurora-A) (Serine/threonine kinase 15) (Aurora/IPL1-related kinase 1)  
(Aurora-related  
kinase 1) (hARK1) (Breast-tumor-amplified kinase).

[Source:Unirot/SWISSPROT;Acc:O14965]

TCCATCTCAAAAATAATAATAATACATTTTAGTAGTAACCTTTGTGAAGTGTCTACATTTGTTTCCTCTTTGTCAGTT  
TTTTGCTCAATTCCATTTTG

In100 candidate3472 (in intron):

LOCUS ENSG00000087586

DESCRIPTION Serine/threonine-protein kinase 6 (EC 2.7.11.1) (Aurora kinase )  
(Aurora-A) (Serine/threonine kinase 15) (Aurora/IPL1-related kinase 1)  
(Arorarelated  
kinase 1) (hARK1) (Breast-tumor-amplified kinase).

[Source:Unirot/SWISSPROT;Acc:O14965]

ATTAATATGGCACATTTGTCACATTCAATGAACCAATATTGATATATAACTATTAAGTCCACATTTTATTCAGAT  
TTTCTTAGTTTTTCTCATGA

In100 candidate3473 (in intron):

LOCUS ENSG00000101844

DESCRIPTION Cysteine protease ATG4A (EC 3.4.22.-) (Autophagy-related protei 4  
homolog A) (hAPG4A) (Autophagin-2) (Autophagy-related cysteine endopeptiase 2)  
(AUT-like 2 cysteine endopeptidase). [Source:Uniprot/SWISSPROT;Acc:QWYN0]

GCATCTTTTTATATGCTTTTTGGCCATTTGTATATCATCTTTAGATAACTATTCAATTCTTTGCCCATTTTTAATCAGGT  
TATTTGATTTTTTGTGTTC

In100 candidate3474 (in intron):

LOCUS ENSG00000157657

DESCRIPTION zinc finger protein 618 [Source:RefSeq\_peptide;Acc:NP\_588615]

TTTCTTCTTTAATATCTAACCTCTTCTTTTTTTTTTCTAACCTATTCTTAATACTACCCAGTGTATTTTTTTAATCCCA  
GGCATTGTATTTTTCATCTC

In100 candidate3475 (in intron):

LOCUS ENSG00000157657

DESCRIPTION zinc finger protein 618 [Source:RefSeq\_peptide;Acc:NP\_588615]

TTTCTATTTCTTTAACTTCTGTTTATTTTTATTCATTTTCTGCTTTCTTTTGGCTTATTTTGATTTTATTCTTCTCAGTT  
CATTTCTTTTTTGAGTGACT

In100 candidate3476 (in intron):

LOCUS ENSG00000197565

DESCRIPTION Collagen alpha-6(IV) chain precursor.

[Source:Uniprot/SWISSPROTAcc:Q14031]

TATTAACACCACCTGTGTGTTTTTTTTTCATTTTCAGATATTATATTTTTCTTTTCTAGAAATTCCTTTTGGATTTTAAATT  
TTACAAACTTCCATTCTTCT

In100 candidate3477 (in intron):

LOCUS ENSG00000152782

DESCRIPTION Pantothenate kinase 1 (EC 2.7.1.33) (Pantothenic acid kinase

1)(hPanK1) (hPanK). [Source:Uniprot/SWISSPROT;Acc:Q8TE04]

CCTGTCCTGGAAGTAACAATGTATCTATCACCTTTTTCAACCCTAAAGTTTTCTTCAACATTGTTTTTCAGTTCCTATC  
CAGTAAGATACTCTTTTTTTT

In100 candidate3478 (in intron):

LOCUS ENSG00000188153

DESCRIPTION Collagen alpha-5(IV) chain precursor.

[Source:Uniprot/SWISSPROTAcc:P29400]

GAAGTGTATATAATAAAAGGTGCAAGCTTCCTGAGAGGTAAGTGTATTTGCAATTTTCGTATATCTTTTCAGATATTTT  
CTGGTATCTATCTTTCAAGT

In100 candidate3479 (in intron):

LOCUS ENSG00000188153

DESCRIPTION Collagen alpha-5(IV) chain precursor.

[Source:Uniprot/SWISSPROTAcc:P29400]

AACATGCCAAATTATTCCATAACACTTGTATCATTCTCTTATAATTTATCCCAGTTCCTCTCATTTCCCTCTGTCTTTAA  
TCTTATCTATTTTAAAATTA

In100 candidate3480 (in intron):

LOCUS ENSG00000188153

DESCRIPTION Collagen alpha-5(IV) chain precursor.

[Source:Uniprot/SWISSPROTAcc:P29400]

CCAACAAAGGCACTTAAATGCATCAAATTTTGGTAACAAATATTAATTTTCACTTCATTCATACTGTTTCACCAGTCAAC  
TTTTGTTTGAGTATTTTCTT

In100 candidate3481 (in intron):

LOCUS ENSG00000148688

DESCRIPTION Ribonuclease P protein subunit p30 (EC 3.1.26.5) (RNaseP protei

p30) (RNase P subunit 2). [Source:Uniprot/SWISSPROT;Acc:P78346]

ATAACTGGTATTTGTGGTTTTTTTGTGTTTGTGTTTGTGTTTTCATGCTGCTAACCTTTGATAGGCTCAGTTTGAAAGAGC  
CCGTTTTCTTCTGTTTCTTT

In100 candidate3482 (in intron):

LOCUS ENSG00000116120

DESCRIPTION Phenylalanyl-tRNA synthetase beta chain (EC 6.1.1.20)

(Phenylalnine-- tRNA ligase beta chain) (PheRS).

[Source:Uniprot/SWISSPROT;Acc:Q9NSD]

GGAAGTAAATAAAAGTTGGAAAAATTATCCTTGCCCAAACATAACCTCTGTTAACATTTAGGTATATTTCTTTTCAGTC  
TTTTTCTCTGTTTCATGGGGT

In100 candidate3483 (in intron):

LOCUS ENSG00000095397

DESCRIPTION Whirlin (Autosomal recessive deafness type 31 protein).

[SourceUniprot/SWISSPROT;Acc:Q9P202]

CTTCTCATATATTTAATGGCCATTTATAATGTCTTCTTTGTAACCTTGTTTCATGTCTTTTATTATCCTTTTGCTCTCAGGA  
TTTTGGATCTTTTTTTCCTCT

In100 candidate3484 (in intron):

LOCUS ENSG00000123983

DESCRIPTION Long-chain-fatty-acid--CoA ligase 3 (EC 6.2.1.3) (Long-chain acyl-CoA synthetase 3) (LACS 3). [Source:Uniprot/SWISSPROT;Acc:O95573]

CCCTGACACTACTCTGTCGTGATTCTTAGTGATTTCAATATCGTTCTAACACTGTGGTCTTATTATTTCATACTCCAGCC  
TGCCTTTGCTATTCCTTTTC

In100 candidate3485 (in intron):

LOCUS ENSG00000152056

DESCRIPTION AP-1 complex subunit sigma-3 (Adapter-related protein complex  
1sigma- 1C subunit) (Sigma-adaptin 1C) (Adaptor protein complex AP-1 sigma-1  
subunit) (Golgi adaptor HA1/AP1 adaptin sigma-1C subunit) (Clathrin assembly  
protein complex 1 sigma-1C small chain) [Source:Uniprot/SWISSPROT;Acc:Q96PC]  
ACATTGCTTATAACTGCAAAATTTTTCATATGCTTCCAGGATGCCTACAGACACTCCTTTTCCTTCCACATTATCTTGGA  
ACCTTGGACATTTTTTTTTTTT

In100 candidate3486 (in intron):

LOCUS ENSG00000124019

DESCRIPTION family with sequence similarity 124B (FAM124B), mRNA  
[Source:ReSeq\_dna;Acc:NM\_024785]

TTAGGTTGAGGCATGTTATTACATATTTTAATATTAAGTTAACTTTTCCTCCGATAATTTTTTCAAGCTTTTCAGTTTGC  
TTCACGTTCCCGTTCATGTT

In100 candidate3487 (in intron):

LOCUS ENSG00000144460

DESCRIPTION CDNA FLJ30664 fis, clone FCBBF1000604, weakly similar to  
Myosin heavy chain Myr 8b. [Source:Uniprot/SPTREMBL;Acc:Q96NL2]

AACATTTTCAACAACAAATGTTTAATAATATTCTGCATATTTATATATAACCTATTTCCCTATCAATTATTTTTCAGTG  
ATTCTAACTTATTGCTTTTT

In100 candidate3488 (in intron):

LOCUS ENSG00000144468

DESCRIPTION Rhomboid domain-containing protein 1 (EC 3.4.21.-).  
[Source:Uniprot/SWISSPROT;Acc:Q8TEB9]

ACCTTTTATTTTAAACAAAATCATAGGTTTTTTTCTTCCCTTTTTTTTCCTTCCTCCTACACATGTATTTTCAGAATTTAAA

ACAGTCTCTTCTTTCCATTC

In100 candidate3489 (in intron):

LOCUS ENSG00000081052

DESCRIPTION Collagen alpha-4(IV) chain precursor.

[Source:Uniprot/SWISSPROTAcc:P53420]

CATGGTCTTAAGAGTTCAAGGGTGATTTGGAAAATCTGTATAATTAGTATAACAAAAGCATCTTTCCTGTTTGTTTCAGTT  
TTTCATTTATTTATACCTTG

In100 candidate3490 (in intron):

LOCUS ENSG00000081052

DESCRIPTION Collagen alpha-4(IV) chain precursor.

[Source:Uniprot/SWISSPROTAcc:P53420]

AGCTATTGCTTCTATAACTCCACTTATGTTTTATTTGAATTTTCATTTCCAGCATTACCATTTTCATTTCTTTGCTTCATT  
TTCATCATTATTGGCCGATT

In100 candidate3491 (in intron):

LOCUS ENSG00000081052

DESCRIPTION Collagen alpha-4(IV) chain precursor.

[Source:Uniprot/SWISSPROTAcc:P53420]

TCAAGGAAACGGCTTTTTAACTAGCTTTTTATTCATTAATTTTCATATTTTTTTGGTTTGCATTTTCATTTGGTTCAGTC  
TGATCTTTGTTATTTCTTCT

In100 candidate3492 (in intron):

LOCUS ENSG00000198060

DESCRIPTION E3 ubiquitin-protein ligase MARCH5 (EC 6.3.2.-) (Membraneassociated RING finger protein 5) (Membrane-associated RING-CH protein V) (MARCHV) (RING finger protein 153). [Source:Uniprot/SWISSPROT;Acc:Q9NX47]

GTTTTTCTTCAAATACCTTTTCTTTCCACTCTAACTTGAATTCTCATCTGTAGTTATTTCTTTTCTTGAAACCTCAGCT  
GTTTCATCCTGTTTCTTGGT

In100 candidate3493 (in intron):

LOCUS ENSG00000101938

DESCRIPTION Chordin-like protein 1 precursor (Neuralin-1) (Ventroptin) (Neuogenesin-1). [Source:Uniprot/SWISSPROT;Acc:Q9BU40]

GAAATGCTCAACAAATATAACTTGTTGTTTTGTTATTGTTATCACCGTTCTCATCTGGCTCTATATTTTCTTGCAAGTT  
GGTTCCTGGCTGCTTTTTA

In100 candidate3494 (in intron):

LOCUS ENSG00000124237

DESCRIPTION Uncharacterized protein C20orf85.  
[Source:Uniprot/SWISSPROT;AccQ9H1P6]

AGATTTAGATATAAGTAAGTTGTAGTAACAATAAAACATACTTGTTTACCTTCTAAACTTCAGTTATCCTATTTACCCTC  
TCTATAATTTTACCATTTC

In100 candidate3495 (in intron):

LOCUS ENSG00000182752

DESCRIPTION Pappalysin-1 precursor (EC 3.4.24.79) (Pregnancy-associated plasma protein-A) (PAPP-A) (Insulin-like growth factor-dependent IGF-binding protein 4



protease) (IGF-dependent IGFBP-4 protease) (IGFBP-4ase).

[Source:Unirot/SWISSPROT;Acc:Q13219]

AGCATTGCATTTTGTTCATGGGTTTGTTCATAACTAGAAATATGCTCGTGTTCCTTTCCATTTTTCAGAGGAGCATTTTCT  
GTCTTCCTCCTTTCTCCTTT

In100 candidate3496 (in intron):

LOCUS ENSG00000077264

DESCRIPTION Serine/threonine-protein kinase PAK 3 (EC 2.7.11.1) (p21-activaed  
kinase 3) (PAK-3) (Beta-PAK) (Oligophrenin-3).

[Source:Uniprot/SWISSPROTAcc:O75914]

CACTTGAAACAAGAAGATCCCTTAACTTTATAAAAATTTTGCCTAATAACTCTTCCCTTTTTTATTAATTTTCCAGCT  
TTGACATTTTAATGTTCTCT

In100 candidate3497 (in intron):

LOCUS ENSG00000148219

DESCRIPTION astrotactin 2 isoform a [Source:RefSeq\_peptide;Acc:NP\_054729]

AAGGTCACCTTCATATTTAACCCTGGCTCCCTCCATTCTGCCTCTTTTGTCTGTTATTGGTAATGCCCAGACTGGAAG  
CAAGTCTTTTTTTTTTTTTTTT

In100 candidate3498 (in intron):

LOCUS ENSG00000148219

DESCRIPTION astrotactin 2 isoform a [Source:RefSeq\_peptide;Acc:NP\_054729]  
ACCTGTGTCCCTCTATAACTCTCTGTCTCTCTGTCTGTCCATCTATACCTTTTAGATCCCTTTATCTGTTTCCAGGTGGC  
TATATGTGTTTCTGCCTCTC

In100 candidate3499 (in intron):

LOCUS ENSG00000138190

DESCRIPTION Exocyst complex component 6 (Exocyst complex component Sec15A)  
Sec15- like 1). [Source:Uniprot/SWISSPROT;Acc:Q8TAG9]

TCTGCCTATTCTGTTATTGAAAGTAGAAGTATTGGAGTCTTCAACTATAACTGTTGAATTGTCCATTTTTTCTTTCAGTT  
TTGCCAGTTTTTTATTCATG

In100 candidate3500 (in intron):

LOCUS ENSG00000168955

DESCRIPTION Transmembrane 4 L6 family member 20.  
[Source:Uniprot/SWISSPROT;cc:Q53R12]

CATCTTGGGAGGAAGGGAAAGGGTTGACCAAGGCTTGTCCTTATTTTAACTGTTCTTTGCTTCTTCCCTTTTTCCAGTT  
CTTATTTTGTCTTCTGAATA

In100 candidate3501 (in intron):

LOCUS ENSG00000173744

DESCRIPTION Nucleoporin-like protein RIP (HIV-1 Rev-binding protein)  
(Revnteracting  
protein) (Rev/Rex activation domain-binding protein).

[Source:Unprot/SWISSPROT;Acc:P52594]

ATAGAAGAAGCTAGATGTTGTTTGTAACACTCTGAGAGTTTACTTAACTTTTTTTACATTACATATTCCAGGTACAGT  
GTATTTCTTTCTAGCTGTTT

In100 candidate3502 (in intron):

LOCUS ENSG00000138119

DESCRIPTION Myoferlin (Fer-1-like protein 3).

[Source:Uniprot/SWISSPROT;AccQ9NZM1]

AGAAATGGCAATTATATTTAACTTTATGGTTTGCATATTTGTTTCCTCTTTAGCCAGATTCAATTCTCCTTTTTTTATCC  
TATTTTATGAATCACAACCTT

In100 candidate3503 (in intron):

LOCUS ENSG00000153823

DESCRIPTION PTB-containing, cubilin and LRP1-interacting protein (P-CL11)

(rotein NYGGF4). [Source:Uniprot/SWISSPROT;Acc:Q7Z2X4]

ATTGTTTTTAAGCTTGGCTTCCAATTTACAAGCACTCTAACACCTTCTAGAAGTTCTTATTTTCTCAGAAGATCTTTTT  
GCACCCTGTTATGATCTTTC

In100 candidate3504 (in intron):

LOCUS ENSG00000153827

DESCRIPTION Thyroid receptor-interacting protein 12 (TRIP-12).

[Source:Unipot/SWISSPROT;Acc:Q14669]

TGTTGCATTATTAGTTCTTCATTAATGTGCTTTATATTTACTTAACCATAATTGTTAAAATCTTTCCTTTTTGTCAGAT  
TAAAATTTTTTTTTTTTTTTT

In100 candidate3505 (in intron):

LOCUS ENSG00000153827

DESCRIPTION Thyroid receptor-interacting protein 12 (TRIP-12).

[Source:Unipot/SWISSPROT;Acc:Q14669]

GGACCTTTGCTCTAACCATTTGGTATGTTTTAGTCTCTTTAAACGTACATTCCACTTCTTCAGCATATTTTCTCTTG  
CCAGGAAATATCTTTCCTCT

In100 candidate3506 (in intron):

LOCUS ENSG00000078725

DESCRIPTION Deleted in bladder cancer protein 1 precursor (Protein FAM5A).

Source:Uniprot/SWISSPROT;Acc:O60477]

ACTGGAAGGAGCTTCTTAAATCTCCTTAACAATCTGCGTTTTGCTTCTCTCTTTATCTGTCAGCATCATGAATATCTT  
CCACTCTTCTAGTGCTTTCT

In100 candidate3507 (in intron):

LOCUS ENSG00000078725

DESCRIPTION Deleted in bladder cancer protein 1 precursor (Protein FAM5A).

Source:Uniprot/SWISSPROT;Acc:O60477]

GCACCTGACCTAACTGAAACACTTCTTTACTCAATTTCTCTCTCGTTCATCTTTGTTCACTAGGATAGCCTTCTCAGTG  
TCATTGCTGGATTCTTCTCT

In100 candidate3508 (in intron):

LOCUS ENSG00000078725

DESCRIPTION Deleted in bladder cancer protein 1 precursor (Protein FAM5A).

Source:Uniprot/SWISSPROT;Acc:O60477]

AGCTCCTGGATTCATTAACCTTTTGGATGGGTTTTTTGTGTCTCTATTTCTTCAGTTCTGCTCTGATTTTAGTTATTTCT  
TGCCTTCTGCTAGCTTTTGA

In100 candidate3509 (in intron):

LOCUS ENSG00000153832

DESCRIPTION F-box only protein 36. [Source:Uniprot/SWISSPROT;Acc:Q8NEA4]

GCTGCTTTACCTACATAGACAAGTTTTGATAACTTGCGTCTTTATTCTCATTCAATTTTCATTCAGTTAAACATTTTCTA  
ATTTCCATTTTGATTTCTTC

In100 candidate3510 (in intron):

LOCUS ENSG00000072315

DESCRIPTION Short transient receptor potential channel 5 (TrpC5) (Htrp-5)  
(trp5). [Source:Uniprot/SWISSPROT;Acc:Q9UL62]

GGATTAAAGACAATCCAAGACTAGTAATGAAATGCAAGACTTTTAACGAATTACGCTGCTTATTATTTGCTGTTTCAGTG  
TGTTTCCATTCTGCTTTTAC

In100 candidate3511 (in intron):

LOCUS ENSG00000072315

DESCRIPTION Short transient receptor potential channel 5 (TrpC5) (Htrp-5)  
(trp5). [Source:Uniprot/SWISSPROT;Acc:Q9UL62]

TCTACATTAAGTCCCTCCAATCCTCATTAACCTTCTCATTATTTTTTCCTCTTTCTTTTAGTCCTTTTGCTGTCCAGAA  
ATTTTGTCCCTTGTGTTCTT

In100 candidate3512 (in intron):

LOCUS ENSG00000072315

DESCRIPTION Short transient receptor potential channel 5 (TrpC5) (Htrp-5) (trp5). [Source:Uniprot/SWISSPROT;Acc:Q9UL62]

TGACCTCTTTCTGCCTCATTTGACTTCTCTGTAAAATAGGGAAGATAACTAGGCTTTTCATTTGCTGCTTACTCTCAGGT  
CTATTCCCTGCCTGTTTCTT

In100 candidate3513 (in intron):

LOCUS ENSG00000126016

DESCRIPTION Angiomotin. [Source:Uniprot/SWISSPROT;Acc:Q4VCS5]

TCCCTCCCACATTTGCAAAGTACCTAACCCTTGAATGATCTTTTTTTTTTTTTTCCCCAGAAGTCCATGTTTAGTTTCATC  
CTGGGTTCTGTTCTGTTTCCT

In100 candidate3514 (in intron):

LOCUS ENSG00000079263

DESCRIPTION Nuclear body protein SP140 (Nuclear autoantigen Sp-140) (Speckld 140 kDa) (LYSp100 protein) (Lymphoid-restricted homolog of Sp100). [Source:Uniprot/SWISSPROT;Acc:Q13342]

TAAGTTTCTCGAATGTTTTCCTGTTTCAATTTTTTTAACTTCCACTTTAATTTTAATTTTTTTTCTGCTTGCATCAGGC  
TTAAATTGCTCCTTTTTTCT

In100 candidate3515 (in intron):

LOCUS ENSG00000079263

DESCRIPTION Nuclear body protein SP140 (Nuclear autoantigen Sp-140) (Speckld 140 kDa) (LYSp100 protein) (Lymphoid-restricted homolog of Sp100). [Source:Uniprot/SWISSPROT;Acc:Q13342]

TTGCTTTACTTTAAATATTTTGAGGCTATTTATGATTTGTAACTTTTTAATGGATGTTTTTCTTTTATCATTATACAGCA

TTCTGCTTTATCCCTGTTAA

In100 candidate3516 (in intron):

LOCUS ENSG00000147246

DESCRIPTION 5-hydroxytryptamine 2C receptor (5-HT-2C) (Serotonin receptor 2)  
(5- HT2C) (5-HTR2C) (5HT-1C). [Source:Uniprot/SWISSPROT;Acc:P28335]

TAAAACTAACACTACATTATTTTGATATTTGACTGTTTTTCATCTGCCTCTATACCCTTCAAGATGTTTCTTTTCAGTA  
TCATTTTCTTCTCTCATTTT

In100 candidate3517 (in intron):

LOCUS ENSG00000185404

DESCRIPTION CDNA FLJ13054 fis, clone NT2RP3001527, highly similar to Human  
p140 protein (Sp140) mRNA. [Source:Uniprot/SPTREMBL;Acc:Q9H930]

CTTTAAATATGTTGAGACCATTAATGACTTTATAACCTCTTAGTGGATTTCTTTTCTTTTATCATTATACAGCATTCTGC  
TTTATCCATATTGGTGCTTT

In100 candidate3518 (in intron):

LOCUS ENSG00000067066

DESCRIPTION Nuclear autoantigen Sp-100 (Speckled 100 kDa) (Nuclear dotassoiated  
Sp100 protein) (Lysp100b). [Source:Uniprot/SWISSPROT;Acc:P23497]

CCTAACCCTTCTCATATTTTTTTGTTATTATACTATTTCTATATTGTCAGAGCATATGCATTTTCATATTCTCATCTGTCAC  
CCTACTGCTCACTTTTATTT

In100 candidate3519 (in intron):

LOCUS ENSG00000106780

DESCRIPTION Multiple epidermal growth factor-like domains 9 precursor (EGFlike domain-containing protein 5) (Multiple EGF-like domain protein 5).

[Source:Uniprot/SWISSPROT;Acc:Q9H1U4]

GCTTTTAAACATGTAGGTTGATGACATTTTCATTCTTTTGTTTTTTCAAGTTTGCTTCAGTTGTGAGACCATTTTATT  
TCACAGCCTTATTCTCTCTC

In100 candidate3520 (in intron):

LOCUS ENSG00000138193

DESCRIPTION 1-phosphatidylinositol-4,5-bisphosphate phosphodiesterase epsilon  
1 (EC 3.1.4.11) (Phospholipase C-epsilon-1) (PLC-epsilon-1)  
(Phosphoinositidespecific  
phospholipase C epsilon-1) (Pancreas- enriched phospholipase C.

[Source:Uniprot/SWISSPROT;Acc:Q9P212]

AACTTTCAATTTATAAGGTGATACTTAAGCGACAAAGTAACAAGCTATATTGGCTTTCTTTGTTGTTTGTTTACAGATC  
TCCCTTTACATTTAAATGCT

In100 candidate3521 (in intron):

LOCUS ENSG00000204128

DESCRIPTION

AAGTAGGTATTTGCTGGGGACAACCTTTCTCCTTTTCCTTCCTAGATAACTCACTCACAAACCTTTCTCTTCTGATTCAGTG  
ATTTCTTCTCCTGTGTTCCA

In100 candidate3522 (in intron):

LOCUS ENSG00000173692



DESCRIPTION 26S proteasome non-ATPase regulatory subunit 1 (26S proteasome regulatory subunit RPN2) (26S proteasome regulatory subunit S1) (26S proteasome subunit p112). [Source:Uniprot/SWISSPROT;Acc:Q99460]

TTGAACATACTGACATATTCTTTGAAAACAAATTTAGAACTCATATCTAACAATCCCTCCCCTTGTATTTTCCTTACAGCT  
TTCTTTTCAAACTTTTTTTAC

In100 candidate3523 (in intron):

LOCUS ENSG00000102024

DESCRIPTION Plastin-3 (T-plastin). [Source:Uniprot/SWISSPROT;Acc:P13797]

TCATAATAACTAATGATGTTTAACATTTTTTATGCACTTATTTCCCATCTGTTTGCCCTCTTCAGTGAAATGTCTGTTCA  
TGTCTTTTACCTATTTTCTT

In100 candidate3524 (in exon):

LOCUS ENSG00000087916

DESCRIPTION Sodium- and chloride-dependent neutral and basic amino acid transporter B(0+) (Amino acid transporter ATB0+) (Solute carrier family 6 member 14). [Source:Uniprot/SWISSPROT;Acc:Q9UN76]

ATGAAGAAAATGAGGGTCCCATAACTTTGGGCTGCTGCTTGGTTTTGTTTCTCCTTGGTCTCGTCTGTGTGACTCAGGT  
ATACTACAGCATTTTTTTTTC

In100 candidate3525 (in intron):

LOCUS ENSG00000003096

DESCRIPTION Kelch-like protein 13 (BTB and kelch domain-containing protein ).

[Source:Uniprot/SWISSPROT;Acc:Q9P2N7]

AGTAACTTTGGAAGCTATTCTTGCTTCTTGTATCATTTGTGTTCCAGGCTACGTTGGCTCTGTTTCTTTTTATGTGAGTC  
CTTTACACCTCTGTCTTTCT

In100 candidate3526 (in intron):

LOCUS ENSG00000003096

DESCRIPTION Kelch-like protein 13 (BTB and kelch domain-containing protein ).

[Source:Uniprot/SWISSPROT;Acc:Q9P2N7]

TCTGAAAATCCTCAAGCAAAACGTCTTGATCATCCCAAATAACTGTTGTTGTGACTTTTGCTTGTGACCAGTCTGCTTT  
TGTTTTGACTGGGTTACTTC

In100 candidate3527 (in intron):

LOCUS ENSG00000003096

DESCRIPTION Kelch-like protein 13 (BTB and kelch domain-containing protein ).

[Source:Uniprot/SWISSPROT;Acc:Q9P2N7]

ATGTATGGTTTTTCGGTGGTGCTGTTTTAACATGGAAAATTGATGCACTTTTTTCATACTGTCCATCTTTATCTCACAGCT  
TTTCTTTTTCAAGCTTATAT

In100 candidate3528 (in intron):

LOCUS ENSG00000119969

DESCRIPTION Lymphoid-specific helicase (EC 3.6.1.-) (SWI/SNF2-related  
matriassociated

actin-dependent regulator of chromatin subfamily A member 6)

(roliferation-associated SNF2-like protein).

[Source:Uniprot/SWISSPROT;Acc:QNRZ9]

TTAGTCATTTATTCCCTGCTCTTTAACCTGTTAATTTAATATATCCTTCACTTTATTCCACCTAACTTTTTATACCAGGG  
TTTTGATTTTTTTTCCCCTCT

In100 candidate3529 (in intron):

LOCUS ENSG00000119969

DESCRIPTION Lymphoid-specific helicase (EC 3.6.1.-) (SWI/SNF2-related  
matriassociated

actin-dependent regulator of chromatin subfamily A member 6)  
(roliferation-associated SNF2-like protein).

[Source:Uniprot/SWISSPROT;Acc:QNRZ9]

AGAGGTGGGATGTTATTATCATGTAAGGAGACCCTTAAGTTTTGTTTAACTTTCCAGGTTTTTTATTGTACACTA  
TAAACCTACGTATTTTCTTT

In100 candidate3530 (in intron):

LOCUS ENSG00000144535

DESCRIPTION DIS3 mitotic control homolog (*S. cerevisiae*)-like 2

[Source:Refseq\_peptide;Acc:NP\_689596]

AGGTAAGTGCACATACCTTATTCACATTCTACCATTTTCACTTGTACTCCGTATTCAGATTTTACCAGTTTTGCTTTTAC  
TCATTTGTGTGTGTGTTCTG

In100 candidate3531 (in intron):

LOCUS ENSG00000144535

DESCRIPTION DIS3 mitotic control homolog (*S. cerevisiae*)-like 2

[Source:Refseq\_peptide;Acc:NP\_689596]

AGTCATCTGAAGGCTACATTTGTTTCCTTATATGTAAGTCTCCTAATTTTTCTGTTTCTATTGTCTGAGTTCAGGACCT  
TGCAATTATTTTTGACCCTT

In100 candidate3532 (in intron):

LOCUS ENSG00000144535

DESCRIPTION DIS3 mitotic control homolog (*S. cerevisiae*)-like 2

[Source:Refeq\_peptide;Acc:NP\_689596]

TTTTTTCCTCTATTGTTGATGTTTTGTGTATCTTTGATATTTGCCCTTAACCTTTTAATTTAATTTCTTATTTCCAGGG  
ATGTTGCTTTTTTGCCCTTT

In100 candidate3533 (in intron):

LOCUS ENSG00000144535

DESCRIPTION DIS3 mitotic control homolog (*S. cerevisiae*)-like 2

[Source:Refeq\_peptide;Acc:NP\_689596]

ACCTTCTTGAAAATATTATGATGTTAGAGGACCTTAGATAACCATCAACCTCCTCTTATACTCATTAAATCCTTTCAGCT  
TCCTCTTTGCTTTCTTCATA

In100 candidate3534 (in intron):

LOCUS ENSG00000144535

DESCRIPTION DIS3 mitotic control homolog (*S. cerevisiae*)-like 2

[Source:Refeq\_peptide;Acc:NP\_689596]

TTGTTGTTTTAAACTTTGAGCTAGTTTTACTTAACTGGATTTGTCCTTTTCAAACCTTTTTCTTTTCTTGGCTTCAGTC  
CTGCCTCTTCTCTTTTTTTT

In100 candidate3535 (in intron):

LOCUS ENSG00000144535

DESCRIPTION DIS3 mitotic control homolog (*S. cerevisiae*)-like 2

[Source:Refseq\_peptide;Acc:NP\_689596]

GAGTCCCCTTTCTTAAAGCTCTTTTCTCCTGCTTTTCCTAACATCGGTCACTCCTGGTTTTTGTCCGTGTCTCTCTCAGCT  
CTCTTGTTTTTTCTACTGTT

In100 candidate3536 (in intron):

LOCUS ENSG00000131725

DESCRIPTION WD repeat protein 44 (Rabphilin-11).

[Source:Uniprot/SWISSPROT;cc:Q5JSH3]

TTACTAAATGCCTGTTTAACTGCTGTCTGTTTTCTTTTCTTTCCTTCTCAGAATCACATCCAGCTTCTGTCTTCTAACT  
TAAGTCATTTACGTTTTTTC

In100 candidate3537 (in intron):

LOCUS ENSG00000108242

DESCRIPTION Cytochrome P450 2C18 (EC 1.14.14.1) (CYP11C18) (P450-6B/29C).

[Source:Uniprot/SWISSPROT;Acc:P33260]

AGTATGTTGAAAAGTAGTTGAGAAGTTTTTGCTCCTGTAACAATTTACAAAACACGTTTATTTGGTCTCTTTTGCAGTT  
TTCTTATTGTATTCATTTTT

In100 candidate3538 (in intron):

LOCUS ENSG00000165841

DESCRIPTION Cytochrome P450 2C19 (EC 1.14.13.80) ((R)-limonene 6-monooxygenase) (EC 1.14.13.48) ((S)-limonene 6-monooxygenase) (EC 1.14.13.49) ((S)-limonene 7-monooxygenase) (CYPIIC19) (P450-11A) (Mephenytoin 4-hydroxylase) (YPIIC17) (P450-254C). [Source:Uniprot/SWISSPROT;Acc:P33261]  
AGCTCCTGGATTCATTAAC TTTTGAAGGGTTTCTGTGTCTATCTCCTCCAGTTCTGCTCTGATCTTAGTTATTTCTGTCTTCTGCTAGCTTTTGAAT

In100 candidate3539 (in intron):

LOCUS ENSG00000119397

DESCRIPTION centrosomal protein 110kDa [Source:RefSeq\_peptide;Acc:NP\_008949]  
AGTTTAACTCTCCAAGTGACGGTATCTGTTTGCTTCTTCTTTTAGCCCTTGTCTTGGTTTCTTGCAGGCCCTTTTCTGCTGATTCTTTATTCTTCCTTAA

In100 candidate3540 (in intron):

LOCUS ENSG00000119397

DESCRIPTION centrosomal protein 110kDa [Source:RefSeq\_peptide;Acc:NP\_008949]  
TTTTAGAGGGTCTGTGTGCATTTACAAGTTTAACTGTAGTAGTCACTCACATTCTTTTGCAGTTTTTCTTGCACATTGTAATTGTAACAATTTCTTTCT

In100 candidate3541 (in intron):

LOCUS ENSG00000138109

DESCRIPTION Cytochrome P450 2C9 (EC 1.14.13.80) ((R)-limonene 6-monooxygenase) (EC 1.14.13.48) ((S)-limonene 6-monooxygenase) (EC 1.14.13.49) ((S)-limonene 7-monooxygenase) (CYPIIC9) (P450 PB-1) (P450 MP-4/MP-8) (S-mephenytoin 4-hydroxylase) (P-450MP). [Source:Uniprot/SWISSPROT;Acc:P11712]  
TATGGTTTTTGT TTTTGAAATCTACTTTGTCTGTTTTAAATATAGTAACTCATGCTCTTTTTTTTCATTTCCATTGGCAGGT

ACTGTCTCATTCAATTCCTT

In100 candidate3542 (in intron):

LOCUS ENSG00000147251

DESCRIPTION dedicator of cytokinesis 11 [Source:RefSeq\_peptide;Acc:NP\_65325]

GTGCCATGGTAAATTTGGGTACTGAATGCCTGAGACTATTGTTCTGCTAACTTCCTGCTGCTATCTTTTCTTTATCAGTT  
CACATCTTTATTATTTATTT

In100 candidate3543 (in intron):

LOCUS ENSG00000135930

DESCRIPTION Eukaryotic translation initiation factor 4E type 2 (eIF4E type )

(eIF-4E type 2) (mRNA cap-binding protein type 3) (Eukaryotic  
translationinitiation factor 4E-like 3) (Eukaryotic translation initiation  
factor 4E homologous protein) (mRNA cap-binding pro

[Source:Uniprot/SWISSPROT;Acc:O6057]

AGAATTCCTTGTTGCCTATATTAACCTCTAATTAATTTTTCTGTTTTTAGAAACTCCAGTCATGACACTTCTTACATTT  
AACTTGTTCTTTCTTTACCT

In100 candidate3544 (in intron):

LOCUS ENSG00000115468

DESCRIPTION EF-hand domain-containing protein 1 (Swiprosin-2).

[Source:Unipot/SWISSPROT;Acc:Q9BUP0]

AGTTTGAACTAACTATGCACATTTTATATTTTCCCTTCCAGAATTCTACCTCTTAAGACTTCTTCTTTTTTTTTTTTTTTT  
TTTTTTGAGATTGAGTCTCA

In100 candidate3545 (in intron):

LOCUS ENSG00000204120

DESCRIPTION PERQ amino acid-rich with GYF domain-containing protein 2 (Grb1-  
interacting GYF protein 2) (Trinucleotide repeat-containing protein 15).

Source:Uniprot/SWISSPROT;Acc:Q6Y7W6]

TCTAAAATTCCTTACTTAGAGCCTTTCTGTATAGACTGTAGCTAACAAAATTCATCATTCTCATTTGGGCTTTTTCAGGA  
CTGTTGTTACTTCTTACCTA

In100 candidate3546 (in intron):

LOCUS ENSG00000204120

DESCRIPTION PERQ amino acid-rich with GYF domain-containing protein 2 (Grb1-  
interacting GYF protein 2) (Trinucleotide repeat-containing protein 15).

Source:Uniprot/SWISSPROT;Acc:Q6Y7W6]

CTGAAGTCAACTTTATCAAACATGAATATAACTTACTTTAAGTTAATATTTGCATGATATATCTTTTTCTCTCCTCAGTC  
TGCCTACTTTGTTATATTTT

In100 candidate3547 (in intron):

LOCUS ENSG00000204120

DESCRIPTION PERQ amino acid-rich with GYF domain-containing protein 2 (Grb1-  
interacting GYF protein 2) (Trinucleotide repeat-containing protein 15).

Source:Uniprot/SWISSPROT;Acc:Q6Y7W6]

CCTTATATACCATTTATAAAATTCTGTAACATTTCTTTGACCTTTAGATACTTTTACATTTTCTGTGTTATATCCAGTT  
TCTCTAATTTCTACATTATC



In100 candidate3548 (in intron):

LOCUS ENSG00000204120

DESCRIPTION PERQ amino acid-rich with GYF domain-containing protein 2 (Grb1-interacting GYF protein 2) (Trinucleotide repeat-containing protein 15).

Source:Uniprot/SWISSPROT;Acc:Q6Y7W6]

AATGAGAATATGTCTGTTTGCTAAAAGCCTAGACTGATAATTAACATATTAATCAACTTTTTTTGGCCACAGACTTTTCC  
CTTCCTGTCTTTGCATGAGT

In100 candidate3549 (in intron):

LOCUS ENSG00000066248

DESCRIPTION Ephexin-1 (Eph-interacting exchange protein) (Neuronal guanine nucleotide exchange factor). [Source:Uniprot/SWISSPROT;Acc:Q8N5V2]

CCACCACGTCTGGCCACATTTACAATTTTAAACATGTCCATGTACTGCCTGTCTTATTAATATTTTCTACAGATTGCCTT  
TAAATTAAATTTCTTACTTC

In100 candidate3550 (in intron):

LOCUS ENSG00000131724

DESCRIPTION Interleukin-13 receptor alpha-1 chain precursor (IL-13R-alpha-1 (IL- 13RA-1) (CD213a1 antigen). [Source:Uniprot/SWISSPROT;Acc:P78552]

AAGGAGCTTTTTAAACATGGGGATAACATCCAAATACTGCTGATTGTTATTTTTTACTTCAGTGTGTATCTTTTTTTTTT  
CCTTTTTGAGATGGAGTCTC

In100 candidate3551 (in intron):

LOCUS ENSG00000087495

DESCRIPTION Phosphatase and actin regulator 3 (Scapinin) (Scaffold-associated  
PP1- inhibiting protein). [Source:Uniprot/SWISSPROT;Acc:Q96KR7]

GCATGGTCTTGGCACATGTAACATGCCCCGTTTCTCTCTTTCTTCTGGGGTTCAGGCATATTTCTGGTCCATGATAAGAT  
CTTTGCCTCCTTCCTGTCTT

In100 candidate3552 (in intron):

LOCUS ENSG00000077044

DESCRIPTION Diacylglycerol kinase delta (EC 2.7.1.107) (Diglyceride kinase  
elta) (DGK-delta) (DAG kinase delta) (130 kDa diacylglycerol kinase).  
[Source:Uniprot/SWISSPROT;Acc:Q16760]

AAAGCAAGTTATTGAATAATTTGTACATCATGTAACCTCCCTTTATGTCTTTTAGTTTAATTTTTTTTTTTTACACAGGG  
TTTTTTTTTGTTTTGTTTGT

In100 candidate3553 (in intron):

LOCUS ENSG00000077044

DESCRIPTION Diacylglycerol kinase delta (EC 2.7.1.107) (Diglyceride kinase  
elta) (DGK-delta) (DAG kinase delta) (130 kDa diacylglycerol kinase).  
[Source:Uniprot/SWISSPROT;Acc:Q16760]

ATTCCATTCCTCATTTAATTACCTTTGCTGCCTTTTTTCAAAAGTCAATTAACCTTTTATTTTGGAGTCTCTTCCAGAT  
TTTCTATTTTGTTTTATTGA

In100 candidate3554 (in intron):

LOCUS ENSG00000085982

DESCRIPTION Ubiquitin carboxyl-terminal hydrolase 40 (EC 3.1.2.15) (Ubiquitin

thioesterase 40) (Ubiquitin-specific-processing protease 40) (Deubiquitinating enzyme 40). [Source:Uniprot/SWISSPROT;Acc:Q9NVE5]

ATTTTAAATCACATCTAATTTTGTAAATAATTAAGCATTGTTCTGTGTAGTTCTTACAGCTC  
CATTCTCAGATATTTCTACT

In100 candidate3555 (in intron):

LOCUS ENSG00000119977

DESCRIPTION Tectonic-3 precursor. [Source:Uniprot/SWISSPROT;Acc:Q6NUS6]

TCCTAAAAAAGATTCTCAACTTTATCTTTAACTTTTACTGAATTTTATTTTGCCATCAGATTTTAATACCTAA  
GGTCTGTCTTATTCTGTTTC

In100 candidate3556 (in intron):

LOCUS ENSG00000119977

DESCRIPTION Tectonic-3 precursor. [Source:Uniprot/SWISSPROT;Acc:Q6NUS6]

CATAATATCTTTTTCATGTATCTCTGAAGATACTAACAACCTTGCATCTTCATCTTTCATTGTCTGTGTTTCCTCAGAG  
TTGTTTATTCTGTTCATTTG

In100 candidate3557 (in intron):

LOCUS ENSG00000167165

DESCRIPTION UDP-glucuronosyltransferase 1-8 precursor (EC 2.4.1.17)

(UDPgucuronosyltransferase

1A8) (UDPGT) (UGT1\*8) (UGT1-08) (UGT1.8) (UGT- 1H)

(UT1H). [Source:Uniprot/SWISSPROT;Acc:Q9HAW9]

GGGACAAATATCCAAGCTATAACACTGAACTGTGATTTGACATTTTCATTTGTCTCATTTGGAATTTTTTTCCAGTTTCA

TGAATCCTTTTGTGCCACTT

In100 candidate3558 (in intron):

LOCUS ENSG00000167165

DESCRIPTION UDP-glucuronosyltransferase 1-8 precursor (EC 2.4.1.17)

(UDPgucuronosyltransferase

1A8) (UDPGT) (UGT1\*8) (UGT1-08) (UGT1.8) (UGT- 1H)

(UT1H). [Source:Uniprot/SWISSPROT;Acc:Q9HAW9]

GATTGGTCTTCTCAAAGAAATAACTGTGGAATTTGTATATTCTTTTCACTGTTTCATTTTCCGTTTCGTTAATTGCAGCT

TATTTTTGCCTTAATGATTT

In100 candidate3559 (in intron):

LOCUS ENSG00000077713

DESCRIPTION mitochondrial solute carrier protein

[Source:RefSeq\_peptide;AccNP\_660348]

TTTTCTATTCGTTGGTAAGAAGTCTTTATATATTAAAGATATTAACCCTTTGTCATACATTTACACAATTTTTCCAGTT

TGACATTTGGTGTTTTTTTT

In100 candidate3560 (in intron):

LOCUS ENSG00000124215

DESCRIPTION Cadherin-like protein 26 precursor (Cadherin-like protein VR20)

[Source:Uniprot/SWISSPROT;Acc:Q8IXH8]

TTGGTGTGTTGTTGGTCTTTGATAACTATGTGCTTGAACATTTTGCTATGTTTCTTCACCATTTCATGTTCTATCAGTT  
GCTTTTTCCTTTCTTTTCTT

In100 candidate3561 (in intron):

LOCUS ENSG00000173088

DESCRIPTION Novel protein. [Source:Uniprot/SPTREMBL;Acc:Q5VUS1]

TATATTCTATTGACCTGTCTTAACCATTCATTATATAATTTTCTGCCATATTTTATCTCCAGTTAAATCCACCCAATGA  
GTTCTTTCCCTTTATTTCTT

In100 candidate3562 (in intron):

LOCUS ENSG00000175764

DESCRIPTION Tubulin--tyrosine ligase-like protein 11.

[Source:Uniprot/SWISSROT;Acc:Q8NHH1]

CTTCCGATATTCTCATAACATATATTTTGTACTTTTTGTCATTGTCCCACTGTTCTGGATAGTCTCCTTTTTTTCAGTA  
TTTTTTTTCTTTAATTCATT

In100 candidate3563 (in intron):

LOCUS ENSG00000106852

DESCRIPTION LIM/homeobox protein Lhx6.1 (Lhx6).

[Source:Uniprot/SWISSPROT;Ac:Q9UPM6]

AAGACGGTAAGCAAAAAGAAGAAAATAACGATTGCTCCAAATGCTGCCTTCTTCATATTTTAATGTGTATCTTCTCAGAT  
TTTTTTCCATGTATGTTACA

In100 candidate3564 (in intron):

LOCUS ENSG00000064999

DESCRIPTION Ankyrin repeat and SAM domain-containing protein 1A (Odin).

[Source:Uniprot/SWISSPROT;Acc:Q92625]

CTCTATAACTGGCCTTCTCTTTCATCTCATACCCTATTTTCCAGCTCAGTTAATTCCTATACTCACTGTTTTCCCCTAC  
ACGTTGGTTTATACTATTCT

In100 candidate3565 (in intron):

LOCUS ENSG00000130699

DESCRIPTION Transcription initiation factor TFIID subunit 4 (TBPassociatedfactor  
4) (Transcription initiation factor TFIID 135 kDa subunit)  
(TAF(II)15) (TAFII-135) (TAFII135) (TAFII-130) (TAFII130).

[Source:Uniprot/SWISSPROTAcc:O00268]

AGTTGAAGTTTCCATTTTGTTAACTTATTTTGCAATTCTAAGATTTCCATCTAGTTCTTTTTTACAGTTTATATTTCCCC  
TAATTCTTTGAGCTTATTAT

In100 candidate3566 (in intron):

LOCUS ENSG00000112033

DESCRIPTION Peroxisome proliferator-activated receptor delta (PPAR-delta)  
(PAR- beta) (Nuclear hormone receptor 1) (NUC1) (NUC1).

[Source:Uniprot/SWISPROT;Acc:Q03181]

TATTTTTTCTGTCTTTCGAAATGGGATGCTGTTTAACATTTAGTTTTGTGACTTGCCTTTCCCATTTTTTCAGGTGGTTTTT  
GTGGTGTCTGCTTGTCCTCC

In100 candidate3567 (in intron):

LOCUS ENSG00000157985

DESCRIPTION Centaurin-gamma 2 (ARF-GAP with GTP-binding protein-like, ankyrin repeat and pleckstrin homology domains 1) (AGAP-1) (GTP-binding and GTP-activating

protein 1) (GGAP1). [Source:Uniprot/SWISSPROT;Acc:Q9UPQ3]

AAATAGCTGTCTACTCTTACATCTCATGAAAAAAAAATGGCTGTGAATTTAACCTACGGATTTTGTTTTTCTTGCAGTT  
TCTGACTTGTACCTTTTCAT

In100 candidate3568 (in intron):

LOCUS ENSG00000196233

DESCRIPTION Ligand-dependent corepressor (LCoR) (Mblkl-related protein 2).

Source:Uniprot/SWISSPROT;Acc:Q96JN0]

TTGAATAAGCCTGCTTAACTGCTTTTTCATTTTTCAGCTATTTAGTTTACATTTGCTCCTAGCTTTTAATATCCTCAGGT  
GTTTCTTTGTGTCTCTGCAG

In100 candidate3569 (in intron):

LOCUS ENSG00000187122

DESCRIPTION Slit homolog 1 protein precursor (Slit-1) (Multiple epidermal growth factor-like domains 4). [Source:Uniprot/SWISSPROT;Acc:O75093]

TCTTGCTATGTTTCCTGCTTTATCATTTTTCCTAAATCTTCTTAACTATTACTAGTTCTGTCCTCTACTGTTATCAGTC  
CATCTCTTTCAGTCTGGTTT

In100 candidate3570 (in intron):

LOCUS ENSG00000187122

DESCRIPTION Slit homolog 1 protein precursor (Slit-1) (Multiple epidermal growth factor-like domains 4). [Source:Uniprot/SWISSPROT;Acc:075093]

TTTTGGGTGTTTCCTTTAACACGATTATTTTTTCCCAAATGAATTTTTTTTCTTCCTCTTGAGTGTTCTCTCTTCCAGCT  
TCCTGCTCTTTGAAACTGTT

In100 candidate3571 (in intron):

LOCUS ENSG00000186130

DESCRIPTION Zinc finger and BTB domain-containing protein 6 (Zinc finger prtein 482) (Zinc finger protein with interaction domain).

[Source:Uniprot/SWSSPROT;Acc:Q15916]

AAGTTCTCGTTTTGAGATGGTGGCATAAAGGTTCATAACACCTACATTAGACTTTGAGTCTTCTTCTCCTAATTCAGGT  
TTGGGGTTTTTCGTTTGTTT

In100 candidate3572 (in intron):

LOCUS ENSG00000124831

DESCRIPTION leucine rich repeat (in FLII) interacting protein 1

[Source:Refseq\_peptide;Acc:NP\_004726]

TGAGCTGTTGAGAAAGTTGTTGTTTTAACGGTCGGTCCTTTGTAGGGACCTTTTTTTTTCTTCTCTAGTTTCTTTCAGGT  
TCTGTTTGTCTTTGATTTTC

In100 candidate3573 (in intron):

LOCUS ENSG00000011454

DESCRIPTION RAB GTPase activating protein 1

[Source:RefSeq\_peptide;Acc:NP\_06329]

TTCTAGCCTTAGCTGTGCCATTAACTGGTTAAATGACCTTACTTCTCTTGGGGTTGCCATTTCTTTATCTAACAGTATTG  
ATTTGTAAGTTTTTTTTTTC



In100 candidate3574 (in intron):

LOCUS ENSG00000132329

DESCRIPTION Receptor activity-modifying protein 1 precursor (CRLR  
activitymodifying  
protein 1) (Calcitonin-receptor-like receptor activitymodifyingprotein  
1). [Source:Uniprot/SWISSPROT;Acc:O60894]

GCTTTAAGAAGTATGCTTGGAGCTCATCTAACATCTTATTTCCATTTTCTGTTTCTTAATACTTACAGAGGCTTCCGAC  
TTTTTCTCCAGGTCTGTATT

In100 candidate3575 (in intron):

LOCUS ENSG00000132329

DESCRIPTION Receptor activity-modifying protein 1 precursor (CRLR  
activitymodifying  
protein 1) (Calcitonin-receptor-like receptor activitymodifyingprotein  
1). [Source:Uniprot/SWISSPROT;Acc:O60894]

GCCTTTCAACTACTTGAAGTTTACTGGTAACTCTTTTGTCTTCCTATTTTGTTTTAATGACCTCTCTTGCCCACAGCT  
TATTGCTGGATTTCATTTTT

In100 candidate3576 (in intron):

LOCUS ENSG00000005893

DESCRIPTION Lysosome-associated membrane glycoprotein 2 precursor (LAMP-2)  
CD107b antigen). [Source:Uniprot/SWISSPROT;Acc:P13473]

TTCTTCTGTGGTTATTGATTCTTATAACTAGCTTGACTTCTGTTTTTTGGTTTGTTTGTTTGTTTTTTTAGGGTTCAGAA  
TTTTTTTTTTTTTAGGTTTGA

In100 candidate3577 (in intron):

LOCUS ENSG00000005893

DESCRIPTION Lysosome-associated membrane glycoprotein 2 precursor (LAMP-2)  
CD107b antigen). [Source:Uniprot/SWISSPROT;Acc:P13473]

ATGTCTTACGCTTTTGGAATTCAATCTCTTAACTTGTAGGAGAACTTGTACCATTTCAGCATCTTCTGTCAATTGCTAATG  
GCTGTTTCCCTCATCCTATT

In100 candidate3578 (in intron):

LOCUS ENSG00000165209

DESCRIPTION Spermatid perinuclear RNA-binding protein.  
[Source:Uniprot/SWISPROT;Acc:Q96SI9]

CAATAGCTCTCTGGGATAACTTTTTTTTTTTTTTTTTTTTTTTTTTTTTTTTTTTGCTGAACTTGTCTCTTCATCCAGATTCT  
ACTTAGATTTTCAGTTGTCT

In100 candidate3579 (in intron):

LOCUS ENSG00000165209

DESCRIPTION Spermatid perinuclear RNA-binding protein.  
[Source:Uniprot/SWISPROT;Acc:Q96SI9]

TAAAAAAGTATGTCTGTATCTCTCTCCATAAATGATATGTAAACATTATCTTATGTTTTTTCAAGCTTATATTCAGGGCAT  
CACTTTGTTCATGCTATTCT

In100 candidate3580 (in intron):

LOCUS ENSG00000065802

DESCRIPTION Ankyrin repeat and SOCS box protein 1 (ASB-1).

[Source:Uniprot/WISSPROT;Acc:Q9Y576]

TGTAAGTGTTCATTTGATATCTTTCTTCTTATATGTTGTTTTTTCTTTCCTCTTCCATTATACTAGGTTTACAGTC  
TTATTTTATTTTATTTTTTTT

In100 candidate3581 (in intron):

LOCUS ENSG00000065802

DESCRIPTION Ankyrin repeat and SOCS box protein 1 (ASB-1).

[Source:Uniprot/WISSPROT;Acc:Q9Y576]

TTAATCATACTAACGGTGCCTTTTTTTTTTTCTTTTCAACCAGATTGTTTTTATTTTTCATGTTTCTAGTGACTTCTT  
TCCAGCAAAGATGCTTTTTT

In100 candidate3582 (in intron):

LOCUS ENSG00000068024

DESCRIPTION Histone deacetylase 4 (HD4). [Source:Uniprot/SWISSPROT;Acc:P5654]

GGAATGGAATATTAAAATCCCCCTGATGTAAGTGTGGATTGGCATTGTTTCTCTTTTCTAGCTCTGTCAGGTTTAGCCTTT  
GTTTATTTTGAAGCTATTTT

In100 candidate3583 (in intron):

LOCUS ENSG00000112062

DESCRIPTION Mitogen-activated protein kinase 14 (EC 2.7.11.24) (Mitogenactivated  
protein kinase p38 alpha) (MAP kinase p38 alpha) (Cytokine suppressiv

anti-inflammatory drug-binding protein) (CSAID-binding protein) (CSBP)

(MAinteracting

protein 2) (MAP kinase MXI [Source:Uniprot/SWISSPROT;Acc:Q1653]

CACAATGTATACATCTTAACATTTATTGTGCTCTTTTTTTTTTTTTTAAACACCACCTTAAAGTACTCTGCTATTCAGAT  
TTTTCCTTGTGTTTCTCTAA

In100 candidate3584 (in intron):

LOCUS ENSG00000119522

DESCRIPTION DENN domain-containing protein 1A.

[Source:Uniprot/SWISSPROT;Ac:Q8TEH3]

CATATTACGTTAATATAAATTCATGTATTAGAATTTGGATTTTTTAACCAAAAATACCTTTATTTTAATCTTCAGAGAAA  
AAACTCTTTTCTTCTTTTTC

In100 candidate3585 (in intron):

LOCUS ENSG00000119522

DESCRIPTION DENN domain-containing protein 1A.

[Source:Uniprot/SWISSPROT;Ac:Q8TEH3]

AGAAATTATGAAAGATATAGGAATTTAGGAAAGTAACACCTAAGCTTGCCCTGTTTTCTTTCCAGTTTCAATTCAGCTC  
CTCCTCTTTGTAGCTGTGTG

In100 candidate3586 (in intron):

LOCUS ENSG00000119522

DESCRIPTION DENN domain-containing protein 1A.

[Source:Uniprot/SWISSPROT;Ac:Q8TEH3]

ACTTTTCTTGAATTAACCTTTGGTTCTGATTATTACTTTTTCTTCTTCAGGCACTCCAGTTAGCCGTATATTCAATCTTCT  
TTGCCTATTTTCAATATTTT

In100 candidate3587 (in intron):

LOCUS ENSG00000148200

DESCRIPTION Orphan nuclear receptor NR6A1 (Germ cell nuclear factor)  
(GCNF)(Retinoid receptor-related testis-specific receptor) (RTR).

[Source:UniprotSWISSPROT;Acc:Q15406]

CAAAGTATGCCTTTTTGAGATAACCTTTCCTTTCATTCCATTCCTGTTGACTCAGTTCTACCCCTGCTAACTTGTGCAAG  
AAAGTTCTCTTTTTTCTCTT

In100 candidate3588 (in intron):

LOCUS ENSG00000148200

DESCRIPTION Orphan nuclear receptor NR6A1 (Germ cell nuclear factor)  
(GCNF)(Retinoid receptor-related testis-specific receptor) (RTR).

[Source:UniprotSWISSPROT;Acc:Q15406]

ATTCCTGGCCTCTTCTTTTCAAAGTTCCTAACACATACTTCTTTTCCTTCTTTTCTTTTTTTTTTTTTTTGAGACAGAT  
TTTCACTCTTTTTTGCCCAGG

In100 candidate3589 (in intron):

LOCUS ENSG00000112081

DESCRIPTION Splicing factor, arginine/serine-rich 3 (Pre-mRNA-splicing factor  
SRP20). [Source:Uniprot/SWISSPROT;Acc:P84103]

AGTAACTTCTATCTTGGATCTGTCTTCTAGTTCATCTTCTAGTTGCATCTTCCAAATCTCCCTTATACTTCAGTTTA  
GGCCTTTTTCCATTTCTTGG

In100 candidate3590 (in intron):

LOCUS ENSG00000136935

DESCRIPTION Golgin subfamily A member 1 (Golgin-97).

[Source:Uniprot/SWISSPOT;Acc:Q92805]

AGGCTAATTGGGAAAAATTGTCCATTTTATAATATTAATTATTCCTTCTAACAATGTAAATATATTCCATTTATTCAGAT  
TATTTTCTGTGTGTTTTATT

In100 candidate3591 (in intron):

LOCUS ENSG00000115685

DESCRIPTION Protein phosphatase 1 regulatory subunit 7 (Protein phosphatase1  
regulatory subunit 22). [Source:Uniprot/SWISSPROT;Acc:Q15435]

GTCTAACCCTGGCGCCTCTGTTTTCAACCACTTTGTCCTTTTGTTCCCTCTTGATACTTTCTGCTAGCTTTAGTCCAGTG  
CATTTTCCCTTTTATTATTA

In100 candidate3592 (in intron):

LOCUS ENSG00000173611

DESCRIPTION Uncharacterized protein C9orf126.

[Source:Uniprot/SWISSPROT;AccQ8N9R8]

TGAGTATCTTTTCATGTGCTAATTTGCCATTCATATAACTTAGTGAAGTATCCAAATCTTTTGCTCACTTTTTGTCAGTT  
GTTTGTCTTCTTACATAGTT

In100 candidate3593 (in intron):

LOCUS ENSG00000173611

DESCRIPTION Uncharacterized protein C9orf126.

[Source:Uniprot/SWISSPROT;AccQ8N9R8]

AAAAATCTGAGCTCATAACAAAATGATCCCTTTCTTAGCATGTGATTTCCATAAATGCTCTCCTTTCTTTGTCAGAATAA

ATTTTTTTGTTTTTTAATTT

In100 candidate3594 (in intron):

LOCUS ENSG00000125676

DESCRIPTION THO complex subunit 2 (Tho2).

[Source:Uniprot/SWISSPROT;Acc:Q8N27]

GAACAAAACTTGACTTAGTTTAACCAAAAAAACTAACCATATTTCTTTTAAATTCTTGACCTTTGGTTTCTAGCAGCC

AGTTCCTTTTCTTTCAACTT

In100 candidate3595 (in intron):

LOCUS ENSG00000115677

DESCRIPTION Vigilin (High density lipoprotein-binding protein)  
(HDLbindingprotein).

[Source:Uniprot/SWISSPROT;Acc:Q00341]

CTGTGTTAATGATAATGGTTTCATGTTTAAATGTCTAGGACCACTGTTAACACCTCCACCCTGCACTATTCTTTTTCAGGG

TTTTCTTGTTTCATTTTTGTT

In100 candidate3596 (in intron):

LOCUS ENSG00000101972

DESCRIPTION Cohesin subunit SA-2 (Stromal antigen 2) (SCC3 homolog 2).

[Souce:Uniprot/SWISSPROT;Acc:Q8N3U4]

TTTCCTGAGGGCCACCTAAGTTAAACAAAACCTCTAAGATAACGACATCTGAGTTTGTTTTCCGTATGTATTATTCAGGT  
TCCCTTTACCATTTTCTTAG

In100 candidate3597 (in intron):

LOCUS ENSG00000101972

DESCRIPTION Cohesin subunit SA-2 (Stromal antigen 2) (SCC3 homolog 2).

[Source:Uniprot/SWISSPROT;Acc:Q8N3U4]

GGCGTGAGCCACTGCGCCTGACCGAATATGGAAATTCTAACTGAGCTAGGAATTCATGTGTTCCCATTTCTCTTGGCAGAT  
TGATTTCCCTTCCTGTTTTTC

In100 candidate3598 (in intron):

LOCUS ENSG00000119487

DESCRIPTION Stress-activated map kinase-interacting protein 1 (SAPKinteracing  
protein 1) (Putative Ras inhibitor JC310).

[Source:Uniprot/SWISSPROT;Ac:Q9BPZ7]

AGTTATGTCACCTTTTGCTTTTCATTTGTAACCATACTGTCCATTGTAGACATGTACTTCTTATACTTCTCTCCTTCAGTT  
TCCTTCTCTCTCTTTTCTGT

In100 candidate3599 (in intron):

LOCUS ENSG00000119487

DESCRIPTION Stress-activated map kinase-interacting protein 1 (SAPKinteracing  
protein 1) (Putative Ras inhibitor JC310).

[Source:Uniprot/SWISSPROT;Ac:Q9BPZ7]

AAGAGATGACATTGGCATTTAAATTTGAGAAGAGATGGCTTAGATTGTAACAACTGGTAGTGTTTTTTTACACACACAGAC  
TTCTTGTTGATTTTCAGTAC

In100 candidate3600 (in intron):



LOCUS ENSG00000009694

DESCRIPTION Teneurin-1 (Ten-1) (Tenascin-M1) (Ten-m1) (Protein Odd  
Oz/tenmhomolog

1). [Source:Uniprot/SWISSPROT;Acc:Q9UKZ4]

AGTTGGATTATTTTCCTTATATAATTTTAACTTTAGGTTGTGATCTTATTTGCATTTGCCTCTGCCAGGCTCTCTAATCC  
TTTGTATTAATGTTAATTTC

In100 candidate3601 (in intron):

LOCUS ENSG00000009694

DESCRIPTION Teneurin-1 (Ten-1) (Tenascin-M1) (Ten-m1) (Protein Odd  
Oz/tenmhomolog

1). [Source:Uniprot/SWISSPROT;Acc:Q9UKZ4]

GGTCTTGGGTTTCTCATCTGTAAAATGGCGAGTGGAGAGAGGCAAGCTTAACTAGGTGATCCCTATGATTTCTTCCAGCC  
TTATAGTTTTATACTTTTAT

In100 candidate3602 (in intron):

LOCUS ENSG00000196814

DESCRIPTION Protein FAM125B. [Source:Uniprot/SWISSPROT;Acc:Q9H7P6]

TATATAAATTTTATAACGTGCTTATTATTGCATCATATTTTCTTATTGTATTTTTGCAGTATTTTCTTAGATCATCGGAT  
ATTCTTCTATAGTCCTTCTT

In100 candidate3603 (in intron):

LOCUS ENSG00000165886

DESCRIPTION Ubiquitin domain-containing protein 1.

[Source:Uniprot/SWISSPRO;Acc:Q9HAC8]

TTGTTTAGTCTAAATTAAGTTAGAATTGGTATAGATGGCCTTTTTTCTCTCTGCTGGTCTTACTTGCCTCTGCCAGCT  
GCTTATGCTGCTGTTATTTT

In100 candidate3604 (in intron):

LOCUS ENSG00000136828

DESCRIPTION Ral GEF with PH domain and SH3 binding motif 1

[Source:RefSeq\_ptide;Acc:NP\_055451]

AGGTTTGATATTTAGCTTTTTTTAGTTTGATGGTTTGTTTTTAACATGCCAATTTTGTCATTGATTTCTTTCTCCAGTT  
TTCCCACTATTTTCTTAGCT

In100 candidate3605 (in intron):

LOCUS ENSG00000122126

DESCRIPTION Inositol polyphosphate 5-phosphatase OCRL-1 (EC 3.1.3.36)

(Loweoculocerebrorenal syndrome protein). [Source:Uniprot/SWISSPROT;Acc:Q01968]

EXON

CTATATTTATTTTCTTTGTAATATCTTTTATTATAAGATAACCACTGACTATCCACTTGTTTCTCATTTCTTCAGGAA  
CTTTTGACCTCTTTCATAT

In100 candidate3606 (in intron):

LOCUS ENSG00000136895

DESCRIPTION GTPase activating Rap/RanGAP domain-like 3

[Source:RefSeq\_ptie;Acc:NP\_115669]

AACATTAGTTCCTTCTGCTATTCTGTAACATCCTATTTGTTTTCTTAGCAGTGCTTATCACAATCTATATTC  
ATTCATTTACCACTTACTT

In100 candidate3607 (in intron):

LOCUS ENSG00000136895

DESCRIPTION GTPase activating Rap/RanGAP domain-like 3

[Source:RefSeq\_peptide;Acc:NP\_115669]

CTTAAAGGACTTTATAACATGCATCCTCATCTTATTCTCTTGTTTTTCAGTTTATTTACCTACACTTGATTTTTCCTTGTT  
CTGAGTGTGCTCAGTATCTC

In100 candidate3608 (in intron):

LOCUS ENSG00000095713

DESCRIPTION Cartilage acidic protein 1 precursor (Chondrocyte expressed  
protein 68 kDa) (CEP-68) (ASPIC). [Source:Uniprot/SWISSPROT;Acc:Q9NQ79]

AGTTTCTTAACTGTTCTCACATTATTTTCATCTTCTGTCTCTCTGTGCTGCTGCATTCTGGATAATTTTCCAGTTATATCT  
TCCAGTTCACCTAATTATTTTC

In100 candidate3609 (in intron):

LOCUS ENSG00000156639

DESCRIPTION AN1-type zinc finger protein 3 (Testis-expressed sequence 27).

Source:Uniprot/SWISSPROT;Acc:Q9H8U3]

TGCTGAACTAAAATTAGGTCCTTAGAATTAACCCACCACCACCGTCTTTCCTACTACTTCTCCTCGTTATATTTTCAGGT  
TGATCTTTTCCTTTTAAAG

In100 candidate3610 (in intron):

LOCUS ENSG00000183826

DESCRIPTION BTB/POZ domain-containing protein 9.

[Source:Uniprot/SWISSPROT;cc:Q96Q07]

CGATTCATGTGCCAATACTACATTATTTTATTTATAGAGGCTTTATAACATGTTTAAATATCTGCTCTTCTTTTCAGGG  
TTTTCTTGGCTATTCTTGCA

In100 candidate3611 (in intron):

LOCUS ENSG00000183826

DESCRIPTION BTB/POZ domain-containing protein 9.

[Source:Uniprot/SWISSPROT;cc:Q96Q07]

TAATGTCTGTTTTTCTGACATTATTGTAACTTTTGCATCTACACTTGTTATGTCTTTTTCCATACCTTTAGTTTCAGGC  
TTCCTTTGCCCTTATATTTT

In100 candidate3612 (in intron):

LOCUS ENSG00000183826

DESCRIPTION BTB/POZ domain-containing protein 9.

[Source:Uniprot/SWISSPROT;cc:Q96Q07]

TCATGCTGAGAGAATTGTGATATGTAAACCTAATTTACCATTTTCTTAATTTCTTCCCATTACTCCCAGTAATATGCCTC  
TCAAACCATTTTATTTTCTT

In100 candidate3613 (in intron):

LOCUS ENSG00000166024

DESCRIPTION Growth inhibition and differentiation-related protein 88 (Putative  
mitochondrial space protein 32.1). [Source:Uniprot/SWISSPROT;Acc:Q7Z5L2]EXON

TAATCTCACAATCTAAACATAACATAATGAGGCCACATTTTTCATGTTTTTTTTTTCCCAGTCTTCTTTTTCTAGGCAT

TTACTAAAGCCCATCTACTT

In100 candidate3614 (in intron):

LOCUS ENSG00000124721

DESCRIPTION Ciliary dynein heavy chain 8 (Axonemal beta dynein heavy chain ).

[Source:Uniprot/SWISSPROT;Acc:Q96JB1]

AGCCACTGTTTGTCAATTTCTTGTAATCATCATAACTTTTGTACATCTACTCTTTGTTCTTCTTTTCCAGATTGTCTTA

ACAATTCCTATGTTTTTCATC

In100 candidate3615 (in intron):

LOCUS ENSG00000124721

DESCRIPTION Ciliary dynein heavy chain 8 (Axonemal beta dynein heavy chain ).

[Source:Uniprot/SWISSPROT;Acc:Q96JB1]

AGGCCTGCTATGCTAACTCTATTTTTTTTTTTTTTTTTCTGGTGCAGCATTCTTATCAAGTCACTTTGACTATTTGATTTAT

TTTACTTTTTTTTTTTTTTTGA

In100 candidate3616 (in intron):

LOCUS ENSG00000124721

DESCRIPTION Ciliary dynein heavy chain 8 (Axonemal beta dynein heavy chain ).

[Source:Uniprot/SWISSPROT;Acc:Q96JB1]

CTGAGTTTGTGCTGCTGATGAGAAGTCTGCAAGAGTCTAACTGAATATTCTCTTTTAATCCTTAATGTTTCTGCAGTT

TTCTTTACCCCGTGTGGATT

In100 candidate3617 (in intron):

LOCUS ENSG00000124721

DESCRIPTION Ciliary dynein heavy chain 8 (Axonemal beta dynein heavy chain ).

[Source:Uniprot/SWISSPROT;Acc:Q96JB1]

AAATTTAAATTTCTGAAAATGTATATAGTAACATGTGGATCCTTGACTTTTGTTGACTTCATTTTGTTGTCTCATCAGCT  
ATTTTCATTGAACTTTCTTC

In100 candidate3618 (in intron):

LOCUS ENSG00000124721

DESCRIPTION Ciliary dynein heavy chain 8 (Axonemal beta dynein heavy chain ).

[Source:Uniprot/SWISSPROT;Acc:Q96JB1]

TGTGTAGTTTGGAGATTGATAAGCAAGTAACACTTAACATTGCTTCCTTCTTGTTTTTAAAGCAGATTGCAACAAGGCTT  
CAACATCTCTTCTTTTTTTC

In100 candidate3619 (in intron):

LOCUS ENSG00000196152

DESCRIPTION Zinc finger protein 79 (ZNFpT7).

[Source:Uniprot/SWISSPROT;Acc:15937]

GCTGACTGTCAATGACTGGGTTATTTTAACATCTCTCAAAACCCTAATATTCTAAATTTCTCTTTGCATTTCTGCAGCT  
TTTTCTTTACGTATTATATA

In100 candidate3620 (in intron):

LOCUS ENSG00000134594

DESCRIPTION Ras-related protein Rab-33A (Small GTP-binding protein S10).

[Source:Uniprot/SWISSPROT;Acc:Q14088]

AGATAACGCGGCCTTTTTCTGTTTCTGTTCTGGTGTGAGCCCTAACCTGAAATTCTTTCATTGTATCTTTTTTCATCCT

CTTTCATAGTCTTGTAGGCC

In100 candidate3621 (in intron):

LOCUS ENSG00000172987

DESCRIPTION Heparanase-2 (EC 3.2.-.-) (Hpa2).

[Source:Uniprot/SWISSPROT;AccQ8WWQ2]

CCACTTATTTGGTAGCTAATATGCTAATAACCTCTCTCCCACTTCTAGTTGTTGCTTAACTTCTTCATACTTCTACAGAT

TTATGCTTTTCATTCATTTT

In100 candidate3622 (in intron):

LOCUS ENSG00000172987

DESCRIPTION Heparanase-2 (EC 3.2.-.-) (Hpa2).

[Source:Uniprot/SWISSPROT;AccQ8WWQ2]

AGTTATTACTTGATATCATTGCCTTTTAACCTGAAGCACTTCCTTTAATATTTCTTGTGTTGCAGGTCTGCTAGCAACAA

ATTCTCTCAGTCTTTTTTTTT

In100 candidate3623 (in intron):

LOCUS ENSG00000172987

DESCRIPTION Heparanase-2 (EC 3.2.-.-) (Hpa2).

[Source:Uniprot/SWISSPROT;AccQ8WWQ2]

TCAAGCACACTTGATGGGATTTATAGTGTAATTTTGAAGTAACACACATATATATATATATATTTAACCTCTCTTTTCAGTT  
TTAGTTTTGTTTATTCATTA

In100 candidate3624 (in intron):

LOCUS ENSG00000142609

DESCRIPTION KIAA1751 (KIAA1751), mRNA [Source:RefSeq\_dna;Acc:NM\_001080484]

EXON

CTGAATTAAGCCGTGCTTTCACCTCTGTAACAATGTTTCCATTGCTTCCTTGCAGACTCCACTTACCTGTGTTTTGGAT  
CCTCCTTGCTGGTCTTTGGT

In100 candidate3625 (in intron):

LOCUS ENSG00000067606

DESCRIPTION Protein kinase C zeta type (EC 2.7.11.13) (nPKC-zeta).

[Source:niprot/SWISSPROT;Acc:Q05513]

GGTTGGTGATAACGTCTCCTTTTGGTGTTTTCTTTGGCCTCGTACTCAGCTGTTTTTCACCGAGAGTCCCTTTTTGTGTTT  
GTCCTGGCCTTTGCGGCTTC

In100 candidate3626 (in intron):

LOCUS ENSG00000119929

DESCRIPTION Copper homeostasis protein cutC homolog.

[Source:Uniprot/SWISSPOT;Acc:Q9NTM9]

TTTCTAAATCGTTCTATTTAACCCCTTTGCTATTACTTACCTTCTACCATATATACATTTTTCTTCTCAGTGTCTGTCCTA  
CCTTTTAGAGCCATCTTTGT

In100 candidate3627 (in intron):

LOCUS ENSG00000101210

DESCRIPTION Elongation factor 1-alpha 2 (EF-1-alpha-2) (Elongation factor 1A-



2) (eEF1A-2) (Statin S1). [Source:Uniprot/SWISSPROT;Acc:Q05639]

AAACGCTTTTGTAACTTACTGTCTGAGACATCTCTGTCATACTTTTATTCTCTACAGTCTTCATTGCCCCCTCTTTGCTG  
GCCTCTTCATATGATTTATT

In100 candidate3628 (in intron):

LOCUS ENSG00000164627

DESCRIPTION Kinesin-like protein KIF6. [Source:Uniprot/SWISSPROT;Acc:Q6ZMV9  
TGCCTATTTCTGTAACATCATATTAAACATACATTTTTCTTTTCATTCAGTGTTATCCCTTAGACTTTGAAAAATATATT  
TCTTTCTTTTTATTGCTCTT

In100 candidate3629 (in intron):

LOCUS ENSG00000165675

DESCRIPTION Tumor-associated hydroquinone oxidase (tNOX) (Cytosolic  
ovariancarcinoma antigen 1) (APK1 antigen) [Includes: Hydroquinone [NADH]  
oxidase EC 1.-.-.-); Protein disulfide-thiol oxidoreductase (EC 1.-.-.-)].  
[Source:niprot/SWISSPROT;Acc:Q16206]

TTATTGATAAGTAAGAATTAACACTACTGCCATTTTGTTTCATTGTCTTCTGGTTGTTTTGCAGATCCGTTATTCCTTTCTTC  
CTCTCTTGCCATCTTCTTTT

In100 candidate3630 (in intron):

LOCUS ENSG00000165675

DESCRIPTION Tumor-associated hydroquinone oxidase (tNOX) (Cytosolic ovariancarcinoma antigen 1) (APK1 antigen) [Includes: Hydroquinone [NADH] oxidase EC 1.-.-.-]; Protein disulfide-thiol oxidoreductase (EC 1.-.-.-)].  
[Source:niprot/SWISSPROT;Acc:Q16206]

TTTCATTTGATGCTATTAACAATGCCCCCTTCTTTGTATTTTCTCTACTTTTGCTTTCCTTGGTAATACACTTTGCAGAT  
TCTTCCTTTACTGTCTCCTT

In100 candidate3631 (in intron):

LOCUS ENSG00000107566

DESCRIPTION SPFH domain-containing protein 1 precursor (Protein KE04).  
[Souce:Uniprot/SWISSPROT;Acc:O75477]

CTAAATGTAAGTATATTCTGAGTCTCTTCTTGGTTCTCTCTTTTCCATTACATTTTCCTTTCTTTTATTAGGCAGCCTCT  
TCAACTGTATAGCTTTACTT

In100 candidate3632 (in intron):

LOCUS ENSG00000142606

DESCRIPTION Membrane metallo-endopeptidase-like 1 (EC 3.4.24.11) (Membrane etallo-endopeptidase-like 2) (Neprilysin-2) (Neprilysin II) (NL2) (NEPII) (EP2(m)) [Contains: Membrane metallo-endopeptidase-like 1, soluble form (Nepilysin-2 secreted) (NEP2(s))]. [Source:Uniprot/SWISSPROT;Acc:Q495T6]

TTTTGGATCAACCTATCATTATTTCTCTATTTTCCCTCAACTAACTTGAAGTTTTGTATTTCTATCTTTTCGACAGTT  
ATCTTAGATTTTTTTTGTTTT

In100 candidate3633 (in exon):

LOCUS ENSG00000076770

DESCRIPTION Muscleblind-like X-linked protein (Muscleblind-like protein 3)

Cys3His CCG1-required protein) (Protein HCHCR).

[Source:Uniprot/SWISSPROT;Ac:Q9NUK0]

AATTGTATATATAAAATTCTAATCACTTATGATTCTTAGTTAACATTTTATAAGCTTTGTATTTTACAGGGGCCTCTATT  
TATCCAAATTTATTGTTTTT

In100 candidate3634 (in intron):

LOCUS ENSG00000171004

DESCRIPTION Heparan-sulfate 6-O-sulfotransferase 2 (EC 2.8.2.-) (HS6ST-2).

Source:Uniprot/SWISSPROT;Acc:Q96MM7]

CATTTTAACAATATTAATTCTTTCAATCTATGAGCATGTGATGTCTTTCCTTTTTTGTGTCTTCTTCAATTTCTTCAGAG  
TTTTATTGTTTTTATTTTAC

In100 candidate3635 (in intron):

LOCUS ENSG00000171004

DESCRIPTION Heparan-sulfate 6-O-sulfotransferase 2 (EC 2.8.2.-) (HS6ST-2).

Source:Uniprot/SWISSPROT;Acc:Q96MM7]

AGAGAGGAGGTCGAAGTTTCTAACTATAACTGTGGATTGTCTATTTCTCCTTTTAGTTCCATCAGTTTTCACTTTATAT  
ATTTTGCATTTCTGTTGTTT

In100 candidate3636 (in intron):

LOCUS ENSG00000171004

DESCRIPTION Heparan-sulfate 6-O-sulfotransferase 2 (EC 2.8.2.-) (HS6ST-2).

Source:Uniprot/SWISSPROT;Acc:Q96MM7]

ATAATATACCATTTTAGATGGTATATTATTCATGTGAAAACCTATAACAATATATTTTAATTTTCCTCTTCTCAGCCTTT  
GAACTACCTTTCTCATCATT

In100 candidate3637 (in intron):

LOCUS ENSG00000171004

DESCRIPTION Heparan-sulfate 6-O-sulfotransferase 2 (EC 2.8.2.-) (HS6ST-2).

Source:Uniprot/SWISSPROT;Acc:Q96MM7]

TCTTCGAATATTTTGGTACTTCATTGAACCCTGTGGTGTTTCCCATAGCTAACTGATGCTCTGTTCTGTTTGTCTCAGTC  
TTTTTTCTCTATGTATTTCA

In100 candidate3638 (in intron):

LOCUS ENSG00000171004

DESCRIPTION Heparan-sulfate 6-O-sulfotransferase 2 (EC 2.8.2.-) (HS6ST-2).

Source:Uniprot/SWISSPROT;Acc:Q96MM7]

CAAACACCACCCATTCCTCAATCCTACTTAAGGGATTAAGTATGCCCTTTCTTCTCTTTTTTCTTAGTCTTTTGTCAGCT  
TTGCTGCTCATTAGCTCTTA

In100 candidate3639 (in exon):

LOCUS ENSG00000171004

DESCRIPTION Heparan-sulfate 6-O-sulfotransferase 2 (EC 2.8.2.-) (HS6ST-2).

Source:Uniprot/SWISSPROT;Acc:Q96MM7]

TAGAATTTAACCTAAAATGTGAACTCTTACTTACTTTTTGTACATCTCTATTGTAATGTTTCCAGTTGGGCCAACTATTT  
CTAGCCCTTTAGTTCTTTTT

In100 candidate3640 (in intron):

LOCUS ENSG00000076716

DESCRIPTION Glypican-4 precursor (K-glypican).

[Source:Uniprot/SWISSPROT;Ac:O75487]

TTTTTCCTAACTTTGATATTTTATATGTCCTTCTCTTTCCATTTTTCTTATAACTTCCTCATCTCTCTTTTCAGTTCTG  
GTATTATTTAGTGTTTCCCT

In100 candidate3641 (in intron):

LOCUS ENSG00000147257

DESCRIPTION Glypican-3 precursor (Intestinal protein OCI-5) (GTR2-2) (MXR7)

[Source:Uniprot/SWISSPROT;Acc:P51654]

ATAACATATGATATTGAATATCTTTTTCTAGTTTTTTTTTCCCATCTGTATATCTTCTTTGGTGAGATGTCTGTTTCAGAT  
CTTCTGCCCATTTTTTAATT

In100 candidate3642 (in intron):

LOCUS ENSG00000186376

DESCRIPTION Zinc finger protein 75. [Source:Uniprot/SWISSPROT;Acc:P51815]

TATAGCTCAAGTGTCGACGTAATTCTTACATTCGCATTAATTTTAACTCAATTCTATGTTGCTGTTTTGCAGAGCTGCCT  
TCTTTTCACCTCTGAGTTT

In100 candidate3643 (in intron):

LOCUS ENSG00000186376

DESCRIPTION Zinc finger protein 75. [Source:Uniprot/SWISSPROT;Acc:P51815]

AGTAGGTCTCTTTGGTAAATCTATCCATAACAAAATTCATTATTTTACATCTGTATTTCTTCATTCTACAACCTACAGGC  
TGCTATAATTTGTTTCCTCA

In100 candidate3644 (in intron):

LOCUS ENSG00000186376

DESCRIPTION Zinc finger protein 75. [Source:Uniprot/SWISSPROT;Acc:P51815]

GGGAAGGTAACCCCTTTTCTTCATTCTCATTTATATCCTATCTTTTTCTAAGTTGGTTTCCAGTTTTCCATATTTCTCGAA  
AATTGATCTACATTTTTCCT

In100 candidate3645 (in intron):

LOCUS ENSG00000173275

DESCRIPTION Zinc finger protein 449 (Zinc finger and SCAN  
domaincontainingprotein

19). [Source:Uniprot/SWISSPROT;Acc:Q6P9G9]

TGTTCCCTGCCACTGGTTTAACTAATACTCTTCATTTTCCTTCACTTTCTTTTCTCCATGGAACACAATATCATCTGCAGTT  
TCTATTTCTTCTCTCAGGTT

In100 candidate3646 (in intron):

LOCUS ENSG00000107829

DESCRIPTION F-box/WD repeat protein 4 (F-box and WD-40 domain protein 4)  
(Dctylin). [Source:Uniprot/SWISSPROT;Acc:P57775]

AATCACTTTTAAACATTTTAGTTTTCTTCCACTCTTTCCTTTTCTCTGCATAGGCTCTTTTTTTTAGTAGTTGTAACAGTG  
CTGTTTGTACCCTGCTTTTT

In100 candidate3647 (in intron):

LOCUS ENSG00000156920

DESCRIPTION Probable G-protein coupled receptor 112.

[Source:Uniprot/SWISSPOT;Acc:Q8IZF6]

AGACATTTTCCTTTCCCCTCATCTCTGCTTTTCCCATTACCTAACTCATCAACCTGTCAATTTCTTTCAGAGTACTGTATG  
TAATTTGTGTTTTTTCCTTT

In100 candidate3648 (in intron):

LOCUS ENSG00000120029

DESCRIPTION Uncharacterized protein C10orf76.

[Source:Uniprot/SPTREMBL;Acc:5T2E6]

TGAGCCCCTAGGCCTGGGCTCAAGGTGGATTTTTTGTTTTTTAACCTTTTGGTTTGTTTAGGTTGCCTTTATTTTCAGTT  
ACTCTTTTTGTCTTTTTTTT

In100 candidate3649 (in intron):

LOCUS ENSG00000112655

DESCRIPTION Tyrosine-protein kinase-like 7 precursor (Colon carcinoma kinas  
4) (CCK-4). [Source:Uniprot/SWISSPROT;Acc:Q13308]

AGTTGGTGGCACATTGTTATCTAACTTCTGTCTTGTTTTCCAAATTTGTTCCAGAAAGCTGCTTTAACTTTTTTTTTTTT  
TTTTTTTGAGACAGTCTCGC

In100 candidate3650 (in intron):

LOCUS ENSG00000112655

DESCRIPTION Tyrosine-protein kinase-like 7 precursor (Colon carcinoma kinase 4) (CKK-4). [Source:Uniprot/SWISSPROT;Acc:Q13308]

TAGACTTTGTCTCAAAAAAAAAAACTTTACAAAAAATAACTTTACAAGGAGTTGTTTCTGTCCTTTATTCATCAGTT  
TGTTTTTTTCATCTATTGTT

In100 candidate3651 (in intron):

LOCUS ENSG00000129682

DESCRIPTION Fibroblast growth factor 13 (FGF-13) (Fibroblast growth factor homologous factor 2) (FHF-2). [Source:Uniprot/SWISSPROT;Acc:Q92913]

GTTATATGGAATAGAATGTATATATTGATTTTGGCTGTGTCCTTTAACAAGGATAAATTTTCTTACTTCTGACAGTTTTT  
GTAATCAAACTCTTTTTTTT

In100 candidate3652 (in intron):

LOCUS ENSG00000162408

DESCRIPTION Nucleolar protein 9. [Source:Uniprot/SWISSPROT;Acc:Q5SY16]

GTCTCTAATGTTTTCTTGTAAGAGCTTTATAGTTTTTAACTTTTTAAATTTTTTTATTTTTAAATTTTTCAGCCTGAATT  
TGTTTGTTCAAGTTTTTACTC

In100 candidate3653 (in intron):

LOCUS ENSG00000101974

DESCRIPTION Probable phospholipid-transporting ATPase IG (EC 3.6.3.1) (ATPase class I type 11C) (ATPase IG) (ATPase IQ) (ATPase class VI type 11C).

[Source:Uniprot/SWISSPROT;Acc:Q8NB49]

AGTGTTCTTTTAGTAACCTTTCCCACTATGAAGTTTCATATTTACTCCTACTTCTCTTTCTCTCATTTCCCCAGCGTCTT  
CCTTCCTGTTTTCTTCAGAA

In100 candidate3654 (in intron):



LOCUS ENSG00000101974

DESCRIPTION Probable phospholipid-transporting ATPase IG (EC 3.6.3.1) (ATPase class I type 11C) (ATPase IG) (ATPase IQ) (ATPase class VI type 11C).

[Sorce:Uniprot/SWISSPROT;Acc:Q8NB49]

TGCTCTGAGACTCTTGAGTTGGTAACATAATATTTAATTTTCCTCAATATCCCATTTATTCATTTCTTTAATTCAGCTA  
GTATTTCTCCTTCTCTCCGT

In100 candidate3655 (in intron):

LOCUS ENSG00000101974

DESCRIPTION Probable phospholipid-transporting ATPase IG (EC 3.6.3.1) (ATPase class I type 11C) (ATPase IG) (ATPase IQ) (ATPase class VI type 11C).

[Sorce:Uniprot/SWISSPROT;Acc:Q8NB49]

TGTTTTTAAAAGATTAAACAATAAGAACTATATTTTATATTTACCCACATTTTTTCATTTCCCTATGCAGATTTAAATTTT  
CATATAGTATCTTATTTTTT

In100 candidate3656 (in intron):

LOCUS ENSG00000101974

DESCRIPTION Probable phospholipid-transporting ATPase IG (EC 3.6.3.1) (ATPase class I type 11C) (ATPase IG) (ATPase IQ) (ATPase class VI type 11C).

[Sorce:Uniprot/SWISSPROT;Acc:Q8NB49]

AGGAAATCTTCATCTCTGATAACATGGTTTTTCATTTCTGACTTTACATTTTCATTTTTTTGTAGTATCCCTCTGCCAGCA  
TTCTTCGTTCACTGTTACAT

In100 candidate3657 (in intron):

LOCUS ENSG00000101974

DESCRIPTION Probable phospholipid-transporting ATPase IG (EC 3.6.3.1) (ATPase  
class I type 11C) (ATPase IG) (ATPase IQ) (ATPase class VI type 11C).

[Source:Uniprot/SWISSPROT;Acc:Q8NB49]

AGTGCTATCTGTTGATTTAAGATGTTTAAATATCTTAACATATTTCTGTTGTGCTTTATTTTTCTCAGTATATTCTAGGT  
TTTTTACTTTGCTCATTTCT

In100 candidate3658 (in intron):

LOCUS ENSG00000101974

DESCRIPTION Probable phospholipid-transporting ATPase IG (EC 3.6.3.1) (ATPase  
class I type 11C) (ATPase IG) (ATPase IQ) (ATPase class VI type 11C).

[Source:Uniprot/SWISSPROT;Acc:Q8NB49]

TACATTTTTTCAAATAACCATCTCCTGGATTTCTTGGTCTTTTGTATGGTTTTTTTGCATCTCAGTTTCCCTCAGTTCAG  
CTCTGATTTGGGTATTCT

In100 candidate3659 (in intron):

LOCUS ENSG00000171735

DESCRIPTION Calmodulin-binding transcription activator 1.

[Source:Uniprot/SWISSPROT;Acc:Q9Y6Y1]

GAACAATTCCTTTCTAAATATGTTTTAGCGTATGTTCCATGTGTTTTAACATGTAGTAGTTTGATTATCCTTCAGTTCGC  
AATGTTTTTTAACCTCCATT

In100 candidate3660 (in intron):

LOCUS ENSG00000171735

DESCRIPTION Calmodulin-binding transcription activator 1.

[Source:Uniprot/SISSPROT;Acc:Q9Y6Y1]

AGGATAATAAAAACCACCTATAATCCCATCACCCAAAAATAACCTCTGTTTACATTTTGTTATATTCCTGCCAGTTTGT  
TGTGTTGTTGTTGTTGTTGTTT

In100 candidate3661 (in intron):

LOCUS ENSG00000116288

DESCRIPTION Protein DJ-1 (Oncogene DJ1) (Parkinson disease protein 7).

[Souce:Uniprot/SWISSPROT;Acc:Q99497]

AGATGACATAAGAATAAATACCTGTTGATCCACTGCTCACATTTAACGCTTGTTAATGTCTTGCCATATTCCTTCAGAC  
CCATTTCTCTTTTGTTTTGA

In100 candidate3662 (in intron):

LOCUS ENSG00000116288

DESCRIPTION Protein DJ-1 (Oncogene DJ1) (Parkinson disease protein 7).

[Souce:Uniprot/SWISSPROT;Acc:Q99497]

CTTCTCTTTGTACCTTAGTAATATTTTATTTTCTCATAACCATTTTAAGATCCATTCTTGTTGCTTTCCTATCAGATGAT  
GTTCTGCCATTTTGTTTTT

In100 candidate3663 (in intron):

LOCUS ENSG00000142599

DESCRIPTION Arginine-glutamic acid dipeptide repeats protein (Atrophin-1-like protein) (Atrophin-1-related protein). [Source:Uniprot/SWISSPROT;Acc:Q9P26]

AAAGTTTGGTATTTAACACTTAAATTTGTTTTCTGCTGCCAGTAATGGAGATAATCTATTATCACTTTTTTTTAGGGGTTT  
TTTTTTTTTTTTTTTTTTTTTTT

In100 candidate3664 (in intron):

LOCUS ENSG00000142599

DESCRIPTION Arginine-glutamic acid dipeptide repeats protein (Atrophin-1-like protein) (Atrophin-1-related protein). [Source:Uniprot/SWISSPROT;Acc:Q9P26]

CTTATTTTCATTCCCTCTGCCCCTTCTTAGATAAATAAACATAATATACATCCTTTTGCTACCTTTCTTTTAACAGTA  
TATTCTTGTTCTCCTCAT

In100 candidate3665 (in intron):

LOCUS ENSG00000176988

DESCRIPTION fragile X mental retardation 1 neighbor

[Source:RefSeq\_peptide;cc:NP\_689791]

TGCCATCTTCCTAACATCATCTGCTTTTTTTTTTTTTTTTATCCAGCCTGGATCCCATTGTCTAGTACTTTAATCCATTCT  
TGTTTCCAGTCCCCTTGTTT

In100 candidate3666 (in intron):

LOCUS ENSG00000148843

DESCRIPTION RRP5 protein homolog (Programmed cell death protein 11).

[Source:Uniprot/SWISSPROT;Acc:Q14690]

AGAACTAACCTCTCCTGTCTTCTGTTTTCACTTATACCCAGTTCTGGTTCTCATGGTTTCTCTGCTGTACTGCATTTGAA  
TCCTTTTTTTTTTTTTTTTTTTT

In100 candidate3667 (in intron):

LOCUS ENSG00000107954

DESCRIPTION Neuralized-like protein 1 (h-neuralized 1) (h-neu) (RING  
fingerprotein 67). [Source:Uniprot/SWISSPROT;Acc:O76050]

GCTTATATCATTGAGATCATAATGTGAGAACATTTTAACCCCTGCTTTTCTGCTTTTAAAATTTTCTTTTATTTTCAGAC  
TTTTTTTTTTAAATTTTTTGA

In100 candidate3668 (in intron):

LOCUS ENSG00000130939

DESCRIPTION Ubiquitin conjugation factor E4 B (Ubiquitin fusion  
degradationprotein 2) (Homozygously deleted in neuroblastoma 1).  
[Source:Uniprot/SWISSROT;Acc:O95155]

GTGACTACTTTTAAATACCCCCTCATGGTAAACTTTGTTCTTTTTCTTTAACTCATTCAATAGATGTTTTTCTTTCAGAT  
TATTTTGACATATACTTTTC

In100 candidate3669 (in intron):

LOCUS ENSG00000065621

DESCRIPTION Glutathione transferase omega-2 (EC 2.5.1.18) (GSTO-2).  
[SourceUniprot/SWISSPROT;Acc:Q9H4Y5]

GTGCCATACTTTTCTCTTTGGGAAGACCTGTACCAACAATAACCTCTGCTAAACACTTTCGCTTTTTTAAATTTGCAGGT  
ACTTTTTTGGGGCTGTCTTT

In100 candidate3670 (in intron):

LOCUS ENSG00000120051

DESCRIPTION Leucine-rich repeat-containing protein C10orf80.

[Source:Unipro/SWISSPROT;Acc:Q5T655]

GTCTTCCCCTAACCATTACTACCTATTCCTTTTTTACAGTTTTTCTTTTACTCAACAGTTACCACCACTCAGTATAATA  
TTCTCTCTCTGTCTCTGATT

In100 candidate3671 (in intron):

LOCUS ENSG00000156395

DESCRIPTION VPS10 domain-containing receptor SorCS3 precursor.

[Source:Unipot/SWISSPROT;Acc:Q9UPU3]

GTTTTGTTTTGTTCTTCATAGTGATAACATTTGAATCTTTTATCTTCCTTTTTTGTTTGTTTGTTCTACCAGTGGCTTTT  
ATATTTTCATGTGTCTGCCT

In100 candidate3672 (in intron):

LOCUS ENSG00000108018

DESCRIPTION VPS10 domain-containing receptor SorCS1 precursor (hSorCS).

[Source:Uniprot/SWISSPROT;Acc:Q8WY21]

AAAAGAACTAATGATCTTACCATAATAAATTATTTACCATAACGAATAATTACCCATGTATTTGTTCTTTCCCACAGTC  
CCCTTTTGATTATTTGAATT

In100 candidate3673 (in intron):

LOCUS ENSG00000108018

DESCRIPTION VPS10 domain-containing receptor SorCS1 precursor (hSorCS).

[Source:Uniprot/SWISSPROT;Acc:Q8WY21]

AACTAATTTCACTTAAGAAATTTTAACCTATCATTGTAATTCCTTTCAATGATGTGTTCTATCTTCCTTCTCGTTCAGAG

GTTCTTAGTGATTTTCTTCT

In100 candidate3674 (in intron):

LOCUS ENSG00000108039

DESCRIPTION Xaa-Pro aminopeptidase 1 (EC 3.4.11.9) (X-Pro aminopeptidase 1)(X- prolyl aminopeptidase 1, soluble) (Cytosolic aminopeptidase P) (Solubleaminopeptidase P) (sAmp) (Aminoacylproline aminopeptidase).

[Source:UniprotSWISSPROT;Acc:Q9NQW7]

GCCTGATATTTCACTGATGTGCTTCTTTTTTCTTGCCCTTTTAACATTTTCCCTTCTTGTTTTTCCTTAGCAGTAGGTGTT  
TATTTATATCCTGCCTCTCT

In100 candidate3675 (in intron):

LOCUS ENSG00000011677

DESCRIPTION Gamma-aminobutyric-acid receptor subunit alpha-3 precursor (GAB(A) receptor subunit alpha-3). [Source:Uniprot/SWISSPROT;Acc:P34903]

CTTCTTCAAACACCTCCTAGTTATAGGGCCCTGTAACATTTGCAACATTTGCTTCTTTTTCCACATAGTGGCTTTCAGAT  
ATACTCCATGCTTTCTTGTC

In100 candidate3676 (in intron):

LOCUS ENSG00000148700

DESCRIPTION Gamma-adducin (Adducin-like protein 70).

[Source:Uniprot/SWISSPOT;Acc:Q9UEY8]

ACACTAATAAAATATTAATAGTCTTATTATTGATAACTGAGTTTTGTCTGGTGCTGTTTTTTTTTTTTTTTCCATCAGTT  
TTTTTACTTCTTAGGCTTGG

In100 candidate3677 (in intron):

LOCUS ENSG00000148700

DESCRIPTION Gamma-adducin (Adducin-like protein 70).

[Source:Uniprot/SWISSPOT;Acc:Q9UEY8]

CAATTTTATGGCATTCACTTTGTATCTTAACCTCATTCCTGGCTCTGTCTACCTTCCTTATGCTTATTTTCTCTTCAGCT  
TTATTTTCTTACCTATATT

In100 candidate3678 (in intron):

LOCUS ENSG00000187239

DESCRIPTION Formin-binding protein 1 (Formin-binding protein 17) (hFBP17).

Source:Uniprot/SWISSPROT;Acc:Q96RU3]

TAAAAGCTCTTCTAGGTAGTTTTGATGTGGCTTAGGTAGCACTGTTTAACATTTTGATTCCTTCTCATGCATTCTCAGTT  
TTTGCTCATTTTTATTCTTT

In100 candidate3679 (in intron):

LOCUS ENSG00000203869

DESCRIPTION Novel protein (Fragment). [Source:Uniprot/SPTREMBL;Acc:Q5T481]

EXON

TCACCCCTAACTTTGGCGTCCATATTTGTAAAGTGTCTTTTCCTTCCTCTTTGACTGCCTCAGTTTCCCCCAGAATACCT  
CTTGTGATGCTTCTTTTGTT

In100 candidate3680 (in intron):



LOCUS ENSG00000203869

DESCRIPTION Novel protein (Fragment). [Source:Uniprot/SPTREMBL;Acc:Q5T481]

EXON

TTTCCAACGTGGCTACACCATTTTACACCAATGCCACTAACAATGAATGAGGATTCCAATTTTCCACATTCTTGCAGCA  
CTTATTATCATCTTTTTTGAT

In100 candidate3681 (in intron):

LOCUS ENSG00000203869

DESCRIPTION Novel protein (Fragment). [Source:Uniprot/SPTREMBL;Acc:Q5T481]

EXON

AATGGCACATGCAAATGTGATGAAGATGGGCCTGTGTATCTAACCGTTGTGAGGTTGTCTTTTAGCTCTACTCTGCAGTA  
ACTTTGTTTTTTTTTTTGT

In100 candidate3682 (in intron):

LOCUS ENSG00000097007

DESCRIPTION Proto-oncogene tyrosine-protein kinase ABL1 (EC 2.7.10.2) (p150  
(c- ABL) (Abelson murine leukemia viral oncogene homolog 1).

[Source:Uniprot/SWISSPROT;Acc:P00519]

TAGTACTGGTAACATTTATTAACTTTTTTTTTTTTTTCCTGTTCCCTAATTTGCTACCCAGCTTTTACATCAAAGCTCCTAT  
CACAACCCTTCTTGTTTTTT

In100 candidate3683 (in intron):

LOCUS ENSG00000196284

DESCRIPTION Transcription initiation protein SPT3 homolog (SPT3-like protei).

[Source:Uniprot/SWISSPROT;Acc:075486]

TTGCCTCTTCCATAACTGCTGCCAAATTCTTCTGTTAGTTTCTTTGTAATATCTCTTCAACTTGCCCATATTTTTCAGTC  
CAGTCTCCGTTTTTTTTTTAA

In100 candidate3684 (in intron):

LOCUS ENSG00000196284

DESCRIPTION Transcription initiation protein SPT3 homolog (SPT3-like protei).

[Source:Uniprot/SWISSPROT;Acc:075486]

AGGAAAACAAAAATTTGCATAACAAACCAAATTGTGCACCTTTTTTTTTTTAATTCAGAATTTTCATTATTTTTTTTTGA  
CTTTTTTTTTTTTAAATTTA

In100 candidate3685 (in intron):

LOCUS ENSG00000196284

DESCRIPTION Transcription initiation protein SPT3 homolog (SPT3-like protei).

[Source:Uniprot/SWISSPROT;Acc:075486]

TTTATTTATTTATTTTCGTTCTGTTACTCATTTTTTAACATGTTTTTCTTTTCTTAATTCATGATTTTCCCACAGTTTAC  
TCTGTGCAATTTGATTTTCT

In100 candidate3686 (in intron):

LOCUS ENSG00000196284

DESCRIPTION Transcription initiation protein SPT3 homolog (SPT3-like protei).

[Source:Uniprot/SWISSPROT;Acc:075486]

GATTTTGTATCTAGATATAACTACTCCTTAGTATTTTTTTTTTTTTTGGAGACTGAGTTTCGCTCTTGTTGCCCAGGCTGG

TTAATTAATTCTGTTTTTCCT

In100 candidate3687 (in intron):

LOCUS ENSG00000124813

DESCRIPTION Runt-related transcription factor 2 (Core-binding factor, alpha1 subunit) (CBF-alpha 1) (Acute myeloid leukemia 3 protein) (Oncogene AML-3 (Polyomavirus enhancer-binding protein 2 alpha A subunit) (PEBP2-alpha A) PEA2-alpha A) (SL3-3 enhancer factor 1 [Source:Uniprot/SWISSPROT;Acc:Q13950  
GTGACAATTTTGATAAACTATACATTTATTCCGTGTCACCAATGTGTTAACTGGCAAATACATTATGATCTCCTTCAGTT  
TCTAATCCTTTTTTGCCAAGT

In100 candidate3688 (in intron):

LOCUS ENSG00000172348

DESCRIPTION Calcipressin-2 (Thyroid hormone-responsive protein ZAKI-4) (Dow syndrome candidate region 1-like 1) (Myocyte-enriched calcineurin- interacting protein 2) (MCIP2). [Source:Uniprot/SWISSPROT;Acc:Q14206]

ATTACTCATTTTCCCAAATAACAAGCACTGTTTTTTATGTCTTCTGTATTTGTCTATGTACTTCTACATGCATCTCAGAC  
TCTCGATGGTGTTTTTCCTG

In100 candidate3689 (in intron):

LOCUS ENSG00000172348

DESCRIPTION Calcipressin-2 (Thyroid hormone-responsive protein ZAKI-4) (Dow syndrome candidate region 1-like 1) (Myocyte-enriched calcineurin- interacting protein 2) (MCIP2). [Source:Uniprot/SWISSPROT;Acc:Q14206]

ATGTCTATTACTAATTAAGATTTTTTAAACTAGTAACCTTACTAGAAAATTTTTTCTGACCTCATTCATTTTACCAGTT  
TTGCTTTCATGCTCATTTCT

In100 candidate3690 (in intron):

LOCUS ENSG00000172348

DESCRIPTION Calcipressin-2 (Thyroid hormone-responsive protein ZAKI-4) (Dow syndrome candidate region 1-like 1) (Myocyte-enriched calcineurin- interacting protein 2) (MCIP2). [Source:Uniprot/SWISSPROT;Acc:Q14206]

AACCTCTCAATTTGCAAACCTTGCTTGGGTTTCTTCCATCCTAACAACTGATGCTCTTTTGATGCCATGTTTCCTTCAGTC  
TTTTTTCTTCTCTTAAGTGT

In100 candidate3691 (in intron):

LOCUS ENSG00000146233

DESCRIPTION Cytochrome P450 39A1 (EC 1.14.13.99) (24-hydroxycholesterol 7-  
apha- hydroxylase) (Oxysterol 7-alpha-hydroxylase) (hCYP39A1).

[Source:Uniprt/SWISSPROT;Acc:Q9NYL5]

TTTGTTGAAAACTGGACATTTTAAATAATAGAATGTAACAACTTTGGAAATTAGATTCTTCCCTTTCCTCAGGGTTTGT  
GTTGTTGCTGTTTATTGTTC

In100 candidate3692 (in intron):

LOCUS ENSG00000153291

DESCRIPTION Mitochondrial uncoupling protein 4 (UCP 4) (Solute carrier famiy  
25 member 27). [Source:Uniprot/SWISSPROT;Acc:O95847]

AATTTAACCACTCCAAGAGTATTACTGACTCGGCTTTTGCATGTACTGTTCTATCTTCTTGTAACATTCTTCCTTCAGGT  
CTTCATATACATGTGTCCTT

In100 candidate3693 (in intron):

LOCUS ENSG00000180113

DESCRIPTION Tudor domain-containing protein 6 (Antigen NY-CO-45).

[Source:Uiprot/SWISSPROT;Acc:O60522]

TCCCTTTTAGAGAACATTACATTTGTCATGGTAACACCCATGGAAATAAATTTTTTTGTTTGTATGTTTCTTCTCAGTT  
TGAAGTTTTTCTCTTTTGT

In100 candidate3694 (in intron):

LOCUS ENSG00000112818

DESCRIPTION Meprin A subunit alpha precursor (EC 3.4.24.18) (Endopeptidase-)  
(N- benzoyl-L-tyrosyl-P-amino-benzoic acid hydrolase subunit alpha) (PABApeptide  
hydrolase) (PPH alpha). [Source:Uniprot/SWISSPROT;Acc:Q16819]

TGGGTTTGGATTTGGATTGTTCTTGTTTCTCCAATTCTGTGTGGTGTAACCTTAGATTGTCTATTTGTGCTCTTTCAGAC  
TTTTTGGTGTCATTTAATTC

In100 candidate3695 (in intron):

LOCUS ENSG00000112818

DESCRIPTION Meprin A subunit alpha precursor (EC 3.4.24.18) (Endopeptidase-)  
(N- benzoyl-L-tyrosyl-P-amino-benzoic acid hydrolase subunit alpha) (PABApeptide  
hydrolase) (PPH alpha). [Source:Uniprot/SWISSPROT;Acc:Q16819]  
GTTGGACTTTACCTTTCTCTGGTGCCTCCTTGATTGGCTTAATAACTGACCTTCAAAATTCTTTTTCTGGCAATTCAGAG  
ATTTTGTCTTCATTTGGCTC

In100 candidate3696 (in intron):

LOCUS ENSG00000069122

DESCRIPTION Probable G-protein coupled receptor 116 precursor.  
[Source:Uniprot/SWISSPROT;Acc:Q8IZF2]

TTTCATTTTGCAAAACTCAAACCTCTATACCCATTTGTCAATAACTCCTCATTTCTCTCTACTGACAGCTGCTGGTTAC  
TACTATTCTAATTTCTGTCT

In100 candidate3697 (in intron):

LOCUS ENSG00000198087

DESCRIPTION CD2-associated protein (Cas ligand with multiple SH3 domains)  
(dapter protein CMS). [Source:Uniprot/SWISSPROT;Acc:Q9Y5K6]  
ATATTGGGAATTATTGTTAACCATCATATTTGTTCTTTTTTAAGTACTTTTTTTTTTAAAATTAACCTCAACTTCCCAGGT  
TTTTATTCTTACTTCTCTTC

In100 candidate3698 (in intron):

LOCUS ENSG00000153294

DESCRIPTION Probable G-protein coupled receptor 115 (G-protein coupled  
recetor PGR18). [Source:Uniprot/SWISSPROT;Acc:Q8IZF3]  
TTGGTAATAACTAAGAGTATGTTTTAACATCATGATTCTTTTGTAATGGCTCTTCTTCCCTCTTCTGTGTTTCCCAGGG  
TTTCTTCATCCTAGTGTTTG

In100 candidate3699 (in intron):

LOCUS ENSG00000198924

DESCRIPTION DNA cross-link repair 1A protein (hSNM1) (hSNM1A).

[Source:Unipot/SWISSPROT;Acc:Q6PJP8]

AGGCCAAGCTATTACATTAGGTTGCCTTTAAGTTTTTGTCTGCTAACTTTGCTACTGTTTTTTTTTTTTTAATTGCCAGTT  
TGAATTCTGATTTTTTTTTTTT

In100 candidate3700 (in intron):

LOCUS ENSG00000107290

DESCRIPTION Probable helicase senataxin (EC 3.6.1.-) (SEN1 homolog).

[Source:Uniprot/SWISSPROT;Acc:Q7Z333]

TTGTCACCTAGATTCTAGCTTCTGGATTTTACTGTTGCTTAACTTTGGAAAATGTTACTATTTAGCATCACTTTCCAGAA  
TGTTGCTTTCTTAATTTGCT

In100 candidate3701 (in intron):

LOCUS ENSG00000096006

DESCRIPTION Cysteine-rich secretory protein 3 precursor (CRISP-3) (SGP28

prtein). [Source:Uniprot/SWISSPROT;Acc:P54108]

GGTTTTTTTTTTATTTTAAATTATAAGTTACATTTAACATTAAATGTTATTTTTCATATTGCAACCTTCTGTGCTTCAGGA  
ACTTTTCTTATCTCTCTAGG

In100 candidate3702 (in intron):

LOCUS ENSG00000116708

DESCRIPTION PRAME family member 4. [Source:Uniprot/SWISSPROT;Acc:O60810]

TATTCCTGTCTGTGTTTTGTTCCCATTAACCATCCCCTTCTTATTCTCTATTTCCCAGTACCCTTCCTAGCTTCTGATA  
ACCGTCATTTTACTATTTT

In100 candidate3703 (in intron):

LOCUS ENSG00000008197

DESCRIPTION transcription factor AP-2 beta-like 1

[Source:RefSeq\_peptide;Ac:NP\_758438]

TTTCATTGATATTAAGTGTCTCTTTGTATATTTGTATATCTATAAACTTCCCTCCCTTTCTTCATATTATCAGCT  
ATTCATTTTTTTCCTGGTAC

In100 candidate3704 (in intron):

LOCUS ENSG00000204501

DESCRIPTION PRAME family member 9. [Source:Uniprot/SWISSPROT;Acc:Q5VWM5]

TATTCCTGTCTGTGTTTTGTTCCCATTAACCATCCCCTTCTTATTCTCTATTTCCCAGTACCCTTCCTAGCTTCTGATA  
ACCGTCATTTTACTATTTT

In100 candidate3705 (in intron):

LOCUS ENSG00000107518

DESCRIPTION attractin-like 1 [Source:RefSeq\_peptide;Acc:NP\_997186]

CATCATTTATATGTAAGAGAGTTGCTTAACTGTTATCAAATTGTTCCCTGTTCCCTTTCTATTCCAGAATGTCCTGCTCAA  
TCCTATTGCTCGATTCTTT

In100 candidate3706 (in intron):

LOCUS ENSG00000107518



DESCRIPTION attractin-like 1 [Source:RefSeq\_peptide;Acc:NP\_997186]

TGTTTTTTCTTAGTTTGTCTGGCTAAAGGTTTTCTATTTGTTTAACCTTTCAAAAATCAACCTTTTGTTTCATCAGTC  
TTTTTTTTATTGTTTTCTTC

In100 candidate3707 (in intron):

LOCUS ENSG00000107518

DESCRIPTION attractin-like 1 [Source:RefSeq\_peptide;Acc:NP\_997186]

GATCGTCAAAAATTGTAACCTAAAAATGAATTTCCATTTGTGTCATCTCTGATTTTTTTGTGCAGTGGTTTTTAGTTTTTC  
CTTGTAGAGATCTTCTCTT

In100 candidate3708 (in intron):

LOCUS ENSG00000107518

DESCRIPTION attractin-like 1 [Source:RefSeq\_peptide;Acc:NP\_997186]

TTTTTCTCAATTCTTTAATTTTTACTATTAATATTTTATAGTTATAACTGTACACATATTTACATTTTTGTCAGATTTA  
TCCCTGTATATTTTAAATTT

In100 candidate3709 (in intron):

LOCUS ENSG00000107518

DESCRIPTION attractin-like 1 [Source:RefSeq\_peptide;Acc:NP\_997186]

CCATATATAACAATTTCAATTTCTCATTTCCATTTACAGCCCTTCAGATTTGTAAAGTATTTTCTACGGTTTACACATTC  
CTTGTTTCATTTTTCTACTTC

In100 candidate3710 (in intron):

LOCUS ENSG00000107518

DESCRIPTION attractin-like 1 [Source:RefSeq\_peptide;Acc:NP\_997186]

AAGTACTTGGTATAACATAAAGCATTATATTAATTGTTGCAATCCTTACTATTTTTATTTTTCACTCAGTTCTCTTAATA  
ACTAGCATGCCTCTATTTCT

In100 candidate3711 (in intron):

LOCUS ENSG00000096093

DESCRIPTION EF-hand domain-containing protein 1.

[Source:Uniprot/SWISSPROT;cc:Q5JVL4]

TATGTAACGACATTCTTTGTCTCTTTTGATCTTCTTGGTTTAAAGTCTGTTTTATCAGAGACTAGGATTGCAACCCCTG  
CTTTTTTTTGTTCCTTTT

In100 candidate3712 (in intron):

LOCUS ENSG00000182645

DESCRIPTION

TTCATTGGGTTTTGAATAATCTCCATTTTAACTTCATAGCTATTTTTATATTTATACTATTTTCTGCTACTCAGTGTTT  
TTTTCCCACTGCCAGATATT

In100 candidate3713 (in intron):

LOCUS ENSG00000182645

DESCRIPTION

GTGTTTATGCCTTGAAGAACCATTTGTAAATTGTTTTTTTAACTACCTATCTATGACTTTTTCCCATTTTTCTATCAGGC  
TTTTGGTCTTTTTTGTCCCT

In100 candidate3714 (in intron):

LOCUS ENSG00000203837

DESCRIPTION pancreatic lipase-related protein 3

[Source:RefSeq\_peptide;Acc:P\_001011709]

ATATCCTTTATTATTGGCCACTTAAGTTATTGACCCAATTTCAATGTATTAACTTTATAGCAAACATTATTTTACAGAA  
CTATTAATCTTTCAATCTTT

In100 candidate3715 (in intron):

LOCUS ENSG00000189337

DESCRIPTION kazrin isoform B [Source:RefSeq\_peptide;Acc:NP\_001018000]

GAGACTCCGTCTCAAGAAAAAAAAAAAAACAACAAAAAAACCCTAACTATTATGGATTTGTCTATTTCTCCCTGCAGTT  
CTCAGCTTTCGTTTACTGTA

In100 candidate3716 (in intron):

LOCUS ENSG00000165650

DESCRIPTION PDZ domain-containing protein 8 (Sarcoma antigen NY-SAR-84/NY-SR-  
104). [Source:Uniprot/SWISSPROT;Acc:Q8NEN9]

TTAATGATAACCTTCAAATTGAGTTTTACCTTTTTAAATTTTCTTATTTTTCTTTTTTTATGTCACAAATGTCTCAGCA  
TCTTTTTTTTAACTTATTAA

In100 candidate3717 (in intron):

LOCUS ENSG00000165650

DESCRIPTION PDZ domain-containing protein 8 (Sarcoma antigen NY-SAR-84/NY-SR-104). [Source:Uniprot/SWISSPROT;Acc:Q8NEN9]

TTAACCAAAAGACAACCTGCCTTTATTTTCTCTCTTTCAAATTTTTTCAACCCATTTGTCTCAACTTATATAGTCCAGAC  
TTTTCATTTATTAGCTGTGC

In100 candidate3718 (in intron):

LOCUS ENSG00000107560

DESCRIPTION Rab11 family-interacting protein 2 (Rab11-FIP2) (NRip11).

[Source:Uniprot/SWISSPROT;Acc:Q7L804]

TGACTATAAACACGAAGTATGCAACGTGATTAGTTCCCTTAACACTAACTAGAACTTTTATGTTTAACTCCCCAGATACT  
ACTTGAAACTTTTTTACCCT

In100 candidate3719 (in intron):

LOCUS ENSG00000165669

DESCRIPTION Uncharacterized protein C10orf84.

[Source:Uniprot/SWISSPROT;AccQ9H8W3]

CATCCCTGAACCTTTTCTTAACCCTTGGTAAATGCTTTCTTACTGTTTGCTCAGCACATCCCCCTCAGCCCTAAAGAAT  
TTTGGGTCTTTTTTCTTTTT

In100 candidate3720 (in intron):

LOCUS ENSG00000151893

DESCRIPTION Uncharacterized protein C10orf46.

[Source:Uniprot/SWISSPROT;AccQ86Y37]

GATTTAATTCTCTTATACCTCTAACATACCTTACCTTTCTAATTTTTTTACTATCACAGTTTGTGTTGTTTTTTTTTTTTT  
TTGAGATGGAATCTCACACT

In100 candidate3721 (in intron):

LOCUS ENSG00000137269

DESCRIPTION Leucine-rich repeat-containing protein 1 (LAP and no PDZ protei)  
(LANO adapter protein). [Source:Uniprot/SWISSPROT;Acc:Q9BTT6]

CCCACTAATTAGCATTCTGTGAATCGCCTTTGATTGTTCAACACGTTTAACTCCCCGCCCCATTTTATTCTTCAGCC  
CATGTTTCTCCATTGTGTTC

In100 candidate3722 (in intron):

LOCUS ENSG00000137251

DESCRIPTION Tubulointerstitial nephritis antigen (TIN-Ag).  
[Source:Uniprot/WISSPROT;Acc:Q9UJW2]

CCAACTTTGGCATTGCTGTTTAAATAACTTTGGGCAATTTTCTTAACCTTTCAGAATCTTCAAGTTGTTGTATTATTGT  
TTCAAGTGTTTTTTTTTTCT

In100 candidate3723 (in intron):

LOCUS ENSG00000198873

DESCRIPTION G protein-coupled receptor kinase 5 (EC 2.7.11.16) (G proteincupled  
receptor kinase GRK5). [Source:Uniprot/SWISSPROT;Acc:P34947]

ATTAATATCTGATTTGTGATTCTGAATCTTTAACATATTTAACCGTCTGCTTTTTTTTTTTTTTTTTTTAATTCACAGAT  
GACATGGTCTTTTTTTTTTTT

In100 candidate3724 (in intron):

LOCUS ENSG00000198873

DESCRIPTION G protein-coupled receptor kinase 5 (EC 2.7.11.16) (G proteincupled receptor kinase GRK5). [Source:Uniprot/SWISSPROT;Acc:P34947]

AAAAAACAAAAACAACCTCTGTCCCCTTCTCCCTGTGGCCGTCACCTCTAACCTCTACGGCTGTTATTCTGGTTCAGTCT  
CATTTCTTCTCTCGGACTTT

In100 candidate3725 (in intron):

LOCUS ENSG00000168143

DESCRIPTION family with sequence similarity 83, member B (FAM83B), mRNA  
[Sorce:RefSeq\_dna;Acc:NM\_001010872]

GGAGAAGGACTTACTATTGTCATTTTTTTTCCATATGTCTTGTAACCTCTTTGTTCTTTTTTCCCTCTTTTACTGCAGTC  
TTTTGTGTTTTGTTTTGTTT

In100 candidate3726 (in intron):

LOCUS ENSG00000137252

DESCRIPTION Orexin receptor type 2 (Ox2r) (Hypocretin receptor type 2).  
[Sorce:Uniprot/SWISSPROT;Acc:O43614]

TGTCTTTTATTGGGATTTACTTTTCCTTTTAAACATTCCAACCTTTTTTTTGCTGTATTTTCTCTGTATCATTTTCAGTT  
TTTTCCAATTTTCCAAATTA

In100 candidate3727 (in intron):

LOCUS ENSG00000124749

DESCRIPTION collagen, type XXI, alpha 1 precursor  
[Source:RefSeq\_peptide;Ac:NP\_110447]

AAATGATGACTAACTTTTTTGCAAACATATTCCTTTGTTTCCTTCTACTAATCAGTGTCAGTTATTTGCTTGGAATCCCC  
CAGGCTATTTTCTCTGCTTC

In100 candidate3728 (in intron):

LOCUS ENSG00000198825

DESCRIPTION inositol polyphosphate-5-phosphatase F

[Source:RefSeq\_peptide;Ac:NP\_055752]

TAATTGGGGGAGACTTGAAATCTTTACAATATTGAATCTTGCTGCCTAGTAACATGGTATATGTTTCTGTTAATTCAGGT  
TTTCTATCATATGCTTTATG

In100 candidate3729 (in intron):

LOCUS ENSG00000107651

DESCRIPTION SEC23-interacting protein (p125).

[Source:Uniprot/SWISSPROT;AccQ9Y6Y8]

ACTTACATTTCTATTATTAGTGAAGTTGAGCTCTTTGGGTGTATCTTAACTGGCTGATTATATTTCTTTTGTTCAGTTGCC  
TGTTTCATGACCTTTGTGTTT

In100 candidate3730 (in intron):

LOCUS ENSG00000107651

DESCRIPTION SEC23-interacting protein (p125).

[Source:Uniprot/SWISSPROT;AccQ9Y6Y8]

CTTTTCTTTCTTATGGATTTATAAATATGATACTTAAGGATATTAACCTTTGTCATTATAAGTATTTTTTCCCAGTTTGA  
AATTAGCCTTTTATTTTCC

In100 candidate3731 (in intron):

LOCUS ENSG00000151914

DESCRIPTION Bullous pemphigoid antigen 1, isoforms 1/2/3/4/5/8 (230 kDa  
bulous pemphigoid antigen) (BPA) (Hemidesmosomal plaque protein) (Dystonia  
musulorum protein) (Dystonin) (Fragment). [Source:Uniprot/SWISSPROT;Acc:Q03001  
TTTTTTTTTTTTTTACTTTTAATTGTATTTATTTTAACGCTGAATTTACTCCTGTGCTGTAAGTTTTTGTTTCTTCAGTT  
TCTTCTGGGATATCTTTTTC

In100 candidate3732 (in intron):

LOCUS ENSG00000151914

DESCRIPTION Bullous pemphigoid antigen 1, isoforms 1/2/3/4/5/8 (230 kDa  
bulous pemphigoid antigen) (BPA) (Hemidesmosomal plaque protein) (Dystonia  
musulorum protein) (Dystonin) (Fragment). [Source:Uniprot/SWISSPROT;Acc:Q03001  
CGTCCTTTCTTCTCCCTCCATATTATTCTACACAACCTCTAACACTTAATGTTTACCTTTTTTTTTTTTTGAGATACAGCC  
TTTTTCAAAGTTTTTCTCCA

In100 candidate3733 (in intron):

LOCUS ENSG00000151914

DESCRIPTION Bullous pemphigoid antigen 1, isoforms 1/2/3/4/5/8 (230 kDa  
bulous pemphigoid antigen) (BPA) (Hemidesmosomal plaque protein) (Dystonia  
musulorum protein) (Dystonin) (Fragment). [Source:Uniprot/SWISSPROT;Acc:Q03001  
CTCCCATTTCTGTAGGTTAACTGTTTACTCTGTTGATTCTATCTTTTGTTGTGCAGAAGCTTTTTTATTTAATTAAGTCCC  
ATTTGTCTATATTTGTTTTT

In100 candidate3734 (in intron):

LOCUS ENSG00000203805



DESCRIPTION phosphatidic acid phosphatase type 2 domain containing 1A

[Source:RefSeq\_peptide;Acc:NP\_001025230]

CATAACACCGAAATCTCTCTTATGTCCATGTCCAGTCAATCTTCATCCCCATGAGGCAGCCACTGTTTCAGGGTTTTTTTT  
TGTTTGTTTTTTGTTTTTTT

In100 candidate3735 (in intron):

LOCUS ENSG00000037637

DESCRIPTION F-box only protein 42. [Source:Uniprot/SWISSPROT;Acc:Q6P3S6]

GTTTTAGAAAAATGCACTCGAAGATAGAGATGTGTAAACCTAGATGCCTGTTCTTGGCCTTGCTACTTCTCAGTTATTTGC  
CTCTGAATTTAATCATTTTT

In100 candidate3736 (in intron):

LOCUS ENSG00000112200

DESCRIPTION Zinc finger protein 451 (Coactivator for steroid receptors).

[Source:Uniprot/SWISSPROT;Acc:Q9Y4E5]

GGTTTAATGGTTCACCTGCAAGAATAAATTTCTGATAACCTTATTTGTCCTTACTCCTTCCCTTTAAATATTACTGCAGCT  
TTTTTTTTTTGTTGTTGTTG

In100 candidate3737 (in intron):

LOCUS ENSG00000146143

DESCRIPTION DNA primase large subunit (EC 2.7.7.-) (DNA primase 58 kDa subunit) (p58). [Source:Uniprot/SWISSPROT;Acc:P49643]

AGCATGCCTGGCCTTCACTTTTCATATCATTTATGTGTAACTGGATTAGCACTTTGAATTCCTTCAGGAACCTTTTCCTT  
TGCATTTACGACTTTGCTCA

In100 candidate3738 (in intron):

LOCUS ENSG00000112232

DESCRIPTION KH domain-containing, RNA-binding, signal transduction-associated  
protein 2 [Source:RefSeq\_peptide;Acc:NP\_689901]

GTCATATGATACATATTTGCTGATTAAGTATTTATAAAAAGTTTCCCTTGTTTTTTTAAATTTTGTATTCTTCCAGAA  
ATTATTTACCCTTCTTCCTT

In100 candidate3739 (in intron):

LOCUS ENSG00000112232

DESCRIPTION KH domain-containing, RNA-binding, signal transduction-associated  
protein 2 [Source:RefSeq\_peptide;Acc:NP\_689901]

TGTTATTTCTATCTACATAAATGAGTCAATTGTAAGTTCCTTCCAAAATCTGTTTCCTTTTATATTGCTACTATTTCTCAGAT  
GTCTTTTCATTCCCTTTCTTC

In100 candidate3740 (in intron):

LOCUS ENSG00000112232

DESCRIPTION KH domain-containing, RNA-binding, signal transduction-associated  
protein 2 [Source:RefSeq\_peptide;Acc:NP\_689901]

CATTAAGTGAACCAACTCTAACTTTCTCATCTTGGATCATCTTCTTTTCCTCCTGTATGTCATTTTCATAATACCAGAA  
TACTTTTTCCATTCTAATTC

In100 candidate3741 (in intron):

LOCUS ENSG00000138162

DESCRIPTION Transforming acidic coiled-coil-containing protein 2 (Anti Zuail)

(AZU-1). [Source:Uniprot/SWISSPROT;Acc:O95359]

TTTAACTTTATTTTTCTTCTTTGTGCTTTTCTTAGTTTACTTTGTTTTTCCTTTCCAGTTTTTTGAGTTGGGAATTTAA  
TTCATTATTTTCCTTCTTTC

In100 candidate3742 (in intron):

LOCUS ENSG00000117118

DESCRIPTION Succinate dehydrogenase [ubiquinone] iron-sulfur protein,  
mitochondrial precursor (EC 1.3.5.1) (Ip) (Iron-sulfur subunit of complex II).

[Source:Uniprot/SWISSPROT;Acc:P21912]

ATTAGTCAATTAACCTTCCGAGTTTTTACTTTTCTATATCAGTTTATTTTAAAAATTAGCAGTCCTGGAGTATAGTCTTT  
TCTTTCTTTTTTCTTTTTT

In100 candidate3743 (in intron):

LOCUS ENSG00000118482

DESCRIPTION PHD finger protein 3. [Source:Uniprot/SWISSPROT;Acc:Q92576]

TTTCTATCTAAATGTACATATGCATGCATTTTATTTGTGTGTTTGTCTAACAAGGATCACACTGTTTTCTGGTCAGCA  
TTTTCTTCATAATCCATTCT

In100 candidate3744 (in intron):

LOCUS ENSG00000118482

DESCRIPTION PHD finger protein 3. [Source:Uniprot/SWISSPROT;Acc:Q92576]

ATTTTCTTTAACGTGCTTAAATTTTCTCATATTTATCCTCCAACCTTTTCAGTCAAGTTTTGTACTTCTGATTCTTAAAT  
GTTCTTTTTGTTGTTGTTTT

In100 candidate3745 (in intron):

LOCUS ENSG00000188107

DESCRIPTION EGF-like-domain, multiple 11 [Source:RefSeq\_peptide;Acc:NP\_93804]

AAAAAACACAAAATTTAAACTAATCTACTTTAACTTCACCATCTGCTTTATTTCTGTCTTCTATTTCTATCCTCCAGTT  
AAATCAGTTTTGCTTTTTTTT

In100 candidate3746 (in intron):

LOCUS ENSG00000135298

DESCRIPTION Brain-specific angiogenesis inhibitor 3 precursor.

[Source:Unipot/SWISSPROT;Acc:O60242]

ATCTAACATTTTTATTTGCTTTTCCAACCTTAATTACACTTCCCTTTCTCATGTTATTTTTCCAGTGGTACCTTTCTTGT  
TAATAGATTGCCCTCTTTTT

In100 candidate3747 (in intron):

LOCUS ENSG00000135298

DESCRIPTION Brain-specific angiogenesis inhibitor 3 precursor.

[Source:Unipot/SWISSPROT;Acc:O60242]

TAATACCGAATAATATTGTTTCCTATCCTTTTCATCTCATAACCTCTCTTCCATAGTTCTACTTTTTTCCCCTCTCAGTT  
ATCTATTTTAACTTACTTTC

In100 candidate3748 (in intron):

LOCUS ENSG00000168216

DESCRIPTION LMBR1 domain-containing protein 1 (Nuclear export signalinterating  
protein) (HDAg-L interacting protein NESI).

[Source:Uniprot/SWISSPROT;cc:Q9NUN5]

TGACTGCTTAGACATTTATAATGTTTCCCCATTATAAATAACACTTTGATGAAAATTCTTGTCTGTGCATCTTTTCAGAT  
TTGACCCTATCAGTCTTTTA

In100 candidate3749 (in intron):

LOCUS ENSG00000082293

DESCRIPTION Collagen alpha-1(XIX) chain precursor (Collagen alpha-1(Y) chain).

[Source:Uniprot/SWISSPROT;Acc:Q14993]

TAGTCCTACGTTCTCTTTTATTATTAACCCCAAATATGTTTCTTAGACATTCTCATTTATTATCCCAGTTCTGCCTTCT  
GTAAAATAAGTCTCTTTCCT

In100 candidate3750 (in intron):

LOCUS ENSG00000112280

DESCRIPTION Collagen alpha-1(IX) chain precursor.

[Source:Uniprot/SWISSPROTAcc:P20849]

AGCTATTTGTGTAATAACTGTAAATAATAGGCTTTAATTTTATGCTTTGGATTCCTTTTCTCTCTTTAGTTTACTCAGTC  
TTTTTTTACATATTTTTTAA

In100 candidate3751 (in intron):

LOCUS ENSG00000112305

DESCRIPTION Stromal membrane-associated protein 1.

[Source:Uniprot/SWISSPRO;Acc:Q8IYB5]

AGATTTCAACTTTTCATTACCTGGTATGATTTATGTTAGGCTTTTGGATTAACATATATTTGCTGTTGTTACCTCAGTC  
ATTCTTATTTAATTTTTCAA

In100 candidate3752 (in intron):

LOCUS ENSG00000079841

DESCRIPTION Regulating synaptic membrane exocytosis protein 1 (Rab3-  
interacting molecule 1) (RIM 1). [Source:Uniprot/SWISSPROT;Acc:Q86UR5]

GTATTGGTAGAAAGAGATGAAAACAAAAGTAAAGTAACCAAATGGCTTTTCCTTTTATATTTACACAGCTTAGCAGATT  
TATCTTCCTTGGCTATCTCT

In100 candidate3753 (in intron):

LOCUS ENSG00000079841

DESCRIPTION Regulating synaptic membrane exocytosis protein 1 (Rab3-  
interacting molecule 1) (RIM 1). [Source:Uniprot/SWISSPROT;Acc:Q86UR5]

CTATCAATAACTACTAACTTCTCTTAGTATATCTTTCTCTTATATACTTTCATACCTATTTTCAGTTTTTCTCTTTGTTG  
AAGTACTTTTTGTCAAACCTT

In100 candidate3754 (in intron):

LOCUS ENSG00000079841

DESCRIPTION Regulating synaptic membrane exocytosis protein 1 (Rab3-  
interacting molecule 1) (RIM 1). [Source:Uniprot/SWISSPROT;Acc:Q86UR5]

ATCATCACCCTAACTATTTTAAGAAACAAAACAATACTATCACCTAACTTACTATTTTCATTTCTATTATCTACCAGGA  
TCATATATTCCTTATTTTT

In100 candidate3755 (in intron):

LOCUS ENSG00000079841

DESCRIPTION Regulating synaptic membrane exocytosis protein 1 (Rab3-interacting molecule 1) (RIM 1). [Source:Uniprot/SWISSPROT;Acc:Q86UR5]

TAGGCCAAGCCCTCTCTTTTACTTCTATTAAAATAACTCTATTCTGGCTTTCCTGTTTTTCTGCCCTAATATTGCCAGTG  
ACATCACTTGTTTTCTCTGT

In100 candidate3756 (in intron):

LOCUS ENSG00000185760

DESCRIPTION Potassium voltage-gated channel subfamily KQT member 5 (Voltagegated potassium channel subunit Kv7.5) (Potassium channel subunit alpha KvLT5) (KQT-like 5). [Source:Uniprot/SWISSPROT;Acc:Q9NR82]

TTTTCTGAAAATAGTAACCTTCGAAATGTGATTTTTTTTAAACATTGTTGCTCTCCAACCCTCATATTTATATTTTCAGTT  
TAGTACATTTTTTCTTTATA

In100 candidate3757 (in intron):

LOCUS ENSG00000185760

DESCRIPTION Potassium voltage-gated channel subfamily KQT member 5 (Voltagegated potassium channel subunit Kv7.5) (Potassium channel subunit alpha KvLT5) (KQT-like 5). [Source:Uniprot/SWISSPROT;Acc:Q9NR82]

AATCATCTCATCTGAAATAACCTACCCACCTATTCTCTATCCCATTATTCATTTTTGTTTTCTTCATGTCACTATCAGAA  
ATTTTTACTCACTTTTTTAT

In100 candidate3758 (in intron):

LOCUS ENSG00000185760

DESCRIPTION Potassium voltage-gated channel subfamily KQT member 5

(Voltagegated potassium channel subunit Kv7.5) (Potassium channel subunit alpha KvLT5) (KQT-like 5). [Source:Uniprot/SWISSPROT;Acc:Q9NR82]

ACCTTTTGAAATATTGTTTTGGTAAATAAAAATTCCTGGTCGTGCTAACTGTGGCTATTTGACCTGTTTCTTTCAGAT

ACCATTGTTCTTATCGCTTC

In100 candidate3759 (in intron):

LOCUS ENSG00000185760

DESCRIPTION Potassium voltage-gated channel subfamily KQT member 5

(Voltagegated potassium channel subunit Kv7.5) (Potassium channel subunit alpha KvLT5) (KQT-like 5). [Source:Uniprot/SWISSPROT;Acc:Q9NR82]

ATTGGAAACAACATATAGATTTCCAATAGTTGAAAATCGTTTAAAAATAACAAAGATCTATTCTTCATTTGTGTTTCAGTT

GTTTTTATTGTTTCTTTTTT

In100 candidate3760 (in intron):

LOCUS ENSG00000138161

DESCRIPTION CUB and zona pellucida-like domain-containing protein 1 precursr

(Transmembrane protein UO-44). [Source:Uniprot/SWISSPROT;Acc:Q86UP6]

AAGACTGGAAATTTGCAATCAAAATGGATTTTACTGTAAGTGAAGAAATTTGTCTGATTCTATCTTCAGGTCTTCTAAT

ACAAGCTGTATTTCTCATCT

In100 candidate3761 (in intron):

LOCUS ENSG00000165775

DESCRIPTION FUN14 domain containing 2



[Source:RefSeq\_peptide;Acc:NP\_076423]EXON

CTTTTCTCTAGCTTCTTGAACATATGGAATATAATTGTAATAACTTTTAATGCTTTTGTCTACTAATTTTTTCATCAGTA  
TCATTTCTGGGTTTCTTTTA

In100 candidate3762 (in intron):

LOCUS ENSG00000135314

DESCRIPTION Novel protein similar to chromosome 6 open reading frame 148.

[Source:Uniprot/SPTREMBL;Acc:Q5JSQ8]

TGGAGTCATATCTGAGAAATCATTGCCAAATCTAACATCATGAAGCTTTTGCCCTGTGTTTTCTTCTAACAGTTTACAT  
TTAGGTCTTTGATCCACTTT

In100 candidate3763 (in intron):

LOCUS ENSG00000164430

DESCRIPTION Uncharacterized protein C6orf150.

[Source:Uniprot/SWISSPROT;AccQ8N884]

CTAACTATATTAAACTGTGACTTCCTTTTTTTTTTCGGTTAGGCCCATTTTTTGTCTCAGTGTACTTATTTTTATACATAA  
TTATTTATCTGTTCACCTTCT

In100 candidate3764 (in intron):

LOCUS ENSG00000185515

DESCRIPTION BRCA1/BRCA2-containing complex subunit 3.

[Source:Uniprot/SWISSROT;Acc:P46736]

ATGTATTATAGTTCTTGTTAGCATTTGTTTGCCTATTATAACTTTTTCCACTCTTTTATTTTGGACCTTCCTCAGTTATT  
TTGTTTTAGGTATGCCTCTT

In100 candidate3765 (in intron):

LOCUS ENSG00000185515

DESCRIPTION BRCA1/BRCA2-containing complex subunit 3.

[Source:Uniprot/SWISSROT;Acc:P46736]

TGAGTTCAACCTGATAACTCCAATTCTATTTCCATACTTTAAGGTTTCATCCTAGCATTCCTTTTTTCATATTCACAGTT  
CTTTTTATTAAGCTTTATTG

In100 candidate3766 (in intron):

LOCUS ENSG00000155959

DESCRIPTION Prefoldin subunit 3 (Von Hippel-Lindau-binding protein 1) (VHLbinding  
protein 1) (VBP-1) (HIBBJ46). [Source:Uniprot/SWISSPROT;Acc:P61758]

EXON

CACTCCCAATTGTGCCACACCCTTTGCATTTCTACACTTTGTTTCCTCCTAACTGGAATGACTTTCCCATATTTACAGGA  
TGTGCTCTTTTTTTACCCTT

In100 candidate3767 (in intron):

LOCUS ENSG00000185973

DESCRIPTION Trimethyllysine dioxygenase, mitochondrial precursor (EC  
1.14.1.8) (Epsilon-trimethyllysine 2-oxoglutarate dioxygenase) (TML-  
alphaketoglutarate  
dioxygenase) (TML hydroxylase) (TML dioxygenase) (TMLD).

[Source:Unirot/SWISSPROT;Acc:Q9NVH6]

CCATTAACCACTACTAAATTTCTTAAATATTCCTTCTTTCCTAGTTTCTTCCTATATATCTGACCATTTTTCCTCAGCC  
TCCTTTGCTGGCTTCTTTTG

In100 candidate3768 (in intron):

LOCUS ENSG00000185973

DESCRIPTION Trimethyllysine dioxygenase, mitochondrial precursor (EC  
1.14.1.8) (Epsilon-trimethyllysine 2-oxoglutarate dioxygenase) (TML-  
alphaketoglutarate  
dioxygenase) (TML hydroxylase) (TML dioxygenase) (TMLD).

[Source:Unirot/SWISSPROT;Acc:Q9NVH6]

CTCTCTTGGGAAATACTTGTCTGTCAACTAAGAAGAAGGATAACTTTGTTAAATCTTCCTAGCTTTTCTTGTCAGATAAA  
TGCCTGCTTTATTGCTTTC

In100 candidate3769 (in intron):

LOCUS ENSG00000156535

DESCRIPTION CD109 antigen precursor (p180) (150 KDa TGF-beta-1-binding  
prolin) (r150) (Platelet-specific Gov antigen).

[Source:Uniprot/SWISSPROT;Acc:QYHK3]

GGCTGAATATTTTCTGCTTATTAATAACTTATATTTCTACTTTTGTAATTGCCTCTTCAGTTTTTTTTTTTTTTGTA  
AATTTAGGTCACCTGACATTT

In100 candidate3770 (in intron):

LOCUS ENSG00000077549

DESCRIPTION F-actin capping protein subunit beta (CapZ beta).

[Source:Uniprot/SWISSPROT;Acc:P47756]

GGTTATTGCTTCTTTGTTAACTGGGCGCTTTTCTCCCTTAATTTCTAATTTAGTCAGCAGTACATCGTCCCTCATTTT  
TCACTTGTATGTCTTCACTT

In100 candidate3771 (in intron):

LOCUS ENSG00000065154

DESCRIPTION Ornithine aminotransferase, mitochondrial precursor (EC 2.6.1.1)  
(Ornithine--oxo-acid aminotransferase) [Contains: Ornithine aminotransferase,  
hepatic form; Ornithine aminotransferase, renal form].

[Source:Uniprot/WISSPROT;Acc:P04181]

AACACTCATAACAAGTAACGGATTGTAGTTTGTAGTTTGACTCTCTCTAGTTTCTCAGTTACCTTTTGCTAACAATAGCTT  
TTTCGTTTGTGTTGTTTGTGTT

In100 candidate3772 (in intron):

LOCUS ENSG00000065154

DESCRIPTION Ornithine aminotransferase, mitochondrial precursor (EC 2.6.1.1)  
(Ornithine--oxo-acid aminotransferase) [Contains: Ornithine aminotransferase,  
hepatic form; Ornithine aminotransferase, renal form].

[Source:Uniprot/WISSPROT;Acc:P04181]

TTTTATTTTGGCATAGTTTGTAGACTTAAGAAAAGTTGTAACAAATAGTACTGACATTTTCCTTTTATACTTCTCCCAGAT  
TTTCCAAGTGCTAACTTTTT

In100 candidate3773 (in intron):

LOCUS ENSG00000111799

DESCRIPTION Collagen alpha-1(XII) chain precursor.

[Source:Uniprot/SWISSPRO;Acc:Q99715]

TTTTTCACTTATTTTTTTGTAACAAGGTGTCCCATCTTCTATCTTTGCATCCATTCTTTTATGATACTTTCCATCAGCC  
ACTGTCATTAATTTATCTTC

In100 candidate3774 (in intron):

LOCUS ENSG00000019995

DESCRIPTION Zinc finger Ran-binding domain-containing protein 1 (Protein  
TRBID). [Source:Uniprot/SWISSPROT;Acc:Q9UGI0]

GAATGATTACTAAGTTTAAACTTTGTGTGGAACAATAGCTAAGCTTTAACTATACCTTAGCTGTATGTTTTCCCTCAGTA  
CCAATTTCTTTTATTTATCC

In100 candidate3775 (in intron):

LOCUS ENSG00000175029

DESCRIPTION C-terminal-binding protein 2 (CtBP2).

[Source:Uniprot/SWISSPROTAcc:P56545]

CCAATTATCAATACATTAATATTAAGTGAAGTCTACATTGTATTCTGATGATCTGATATCCTTTTTCCATCCCAGAATCC  
TGTCCAGTTTTTCACCTTGT

In100 candidate3776 (in intron):

LOCUS ENSG00000203780

DESCRIPTION Fibronectin type 3 and ankyrin repeat domains protein 1.

[Source:Uniprot/SWISSPROT;Acc:Q8TC84]

CTCTAACTTACTATTTTTGTTGTTGTTTTTACCTTTCCAGGGACTTTGTTTCAAGGCCTTTCTTTCTCTGCCCCGCCTAA  
GCTGTCTTATTGTTCCCTTTT

In100 candidate3777 (in intron):

LOCUS ENSG00000075151

DESCRIPTION Eukaryotic translation initiation factor 4 gamma 3 (eIF-4-gamma3)  
(eIF-4G 3) (eIF4G 3) (eIF-4-gamma II) (eIF4GII).

[Source:Uniprot/SWISSPRT;Acc:O43432]

GATGCGGAAAAACACTAGACCTAACTCTCAAGTGTTTCTTTTGGTTGCCATCTCTCAGTGGCCCATCATTCTTACATATT  
TCATCGCCATTGTTATTCTT

In100 candidate3778 (in intron):

LOCUS ENSG00000112701

DESCRIPTION Sentrin-specific protease 6 (EC 3.4.22.-) (Sentrin/SUMO-specifi  
protease SENP6) (SUMO-1-specific protease 1).

[Source:Uniprot/SWISSPROT;Ac:Q9GZR1]

TCCTGAAGTAACTTTTTTCTGCCTTCCTTTCTAATATACATATACTACTACTTTAGTTTGTTTTTCCTTTTCATTTTCAGCC  
TGTCTTCCTTTATGGACCTT

In100 candidate3779 (in intron):

LOCUS ENSG00000112701

DESCRIPTION Sentrin-specific protease 6 (EC 3.4.22.-) (Sentrin/SUMO-specifi  
protease SENP6) (SUMO-1-specific protease 1).

[Source:Uniprot/SWISSPROT;Ac:Q9GZR1]

AGAATAACAACCGTTAAGATCTCATTTTTCTCTCCACCTACTCTCTCATTTGTTTCTTAAACTCCCTTTTTTTTCAGCCT  
GTTTTTTGTATCCTTGTTAG

In100 candidate3780 (in intron):

LOCUS ENSG00000162551

DESCRIPTION Alkaline phosphatase, tissue-nonspecific isozyme precursor (EC .1.3.1) (AP-TNAP) (TNSALP) (Alkaline phosphatase liver/bone/kidney isozyme) [Source:Uniprot/SWISSPROT;Acc:P05186]

TTTTAACCATTCTCTTTCTGTTTTGCTAACATCTTTGCTCATTTCTTTTGCATGTTTCTCACAGTTTATGGAGACTTTT  
TGTTTGCTTCATTTTGTTTC

In100 candidate3781 (in intron):

LOCUS ENSG00000187609

DESCRIPTION HBE269. [Source:Uniprot/SPTREMBL;Acc:Q8NHD1]

ATACTAGTTATGGGTAATCTTACCCATATAGTTTTTTAATAACATTTATTCCCTCTTTTTTTCCTTCAGTAAGGAGTGAA  
TTTTTTTTTTTTTTTTTTTTTTT

In100 candidate3782 (in intron):

LOCUS ENSG00000187609

DESCRIPTION HBE269. [Source:Uniprot/SPTREMBL;Acc:Q8NHD1]

CTCCTGTGTAAGTAGTCTGTTTCTTCCCTTTGACCCGTTTCCTTTGGTTTTTTCCCGTATATTTACTTTATTTACCAGTT  
GTGTTTGTTTTTACTTTTGT

In100 candidate3783 (in intron):

LOCUS ENSG00000146247

DESCRIPTION pleckstrin homology domain interacting protein

[Source:RefSeq\_ptide;Acc:NP\_060404]

TTTCCATTGGAAATTTATACCTTTGCAAAAGATAATGGAAATCATGTAACATATAATTTAGTATTTTGTATTCATCAGCA  
TTTTACTGCATTTTTTGTGT

In100 candidate3784 (in intron):

LOCUS ENSG00000165752

DESCRIPTION Serine/threonine-protein kinase 32C (EC 2.7.11.1) (PKE) (YANK3)

[Source:Uniprot/SWISSPROT;Acc:Q86UX6]

AGTATCTCTTTTCACAAATAAAACATTTACTAACCATTTGAGCGTATTCCTCTTGCTTGTTATTGTTGCCTCAGGTTTT  
TGTTTCACATTTTTCATGCT

In100 candidate3785 (in intron):

LOCUS ENSG00000118418

DESCRIPTION High mobility group nucleosome-binding domain-containing protein 3  
(Thyroid receptor-interacting protein 7) (TRIP-7).

[Source:Uniprot/SWISSROT;Acc:Q15651]

ACATCCCCTTGGTTCCTTTTTCCTTATCATCCCCCTAAAGATAACCATCATCACGAATTTGTTGTGTATTCTTCCAGTT  
CTTGCTTTTATACCTTTATG

In100 candidate3786 (in intron):

LOCUS ENSG00000148408

DESCRIPTION Voltage-dependent N-type calcium channel subunit alpha-1B  
(Voltage-gated calcium channel subunit alpha Cav2.2) (Calcium channel, L type,  
alpha-1 polypeptide isoform 5) (Brain calcium channel III) (BIII).



[Source:Unprot/SWISSPROT;Acc:Q00975]

TCTACTTTTTGTTGCTATCACTGGTTTTGGTTTTTAACTTGCATTTGCCTGGTACCTTTCTTTTCCTTTCATTTCCAGCT  
CTTCTTTATCATTTTAAAGTG

In100 candidate3787 (in intron):

LOCUS ENSG00000184677

DESCRIPTION Zinc finger and BTB domain-containing protein 40.

[Source:Uniprt/SWISSPROT;Acc:Q9NUA8]

TCTGAAAATATTGAATATTTCTATCTAACAACATGGGATATCTCTCCATTTTTTAAAGTTCTTTGATATCTTTCATCAGAG  
TTTTGTTGTTTTCTTCATAT

In100 candidate3788 (in intron):

LOCUS ENSG00000118420

DESCRIPTION UBCH10 binding protein with a hect-like domain

[Source:RefSeq\_ptide;Acc:NP\_944602]

TTCCAAAACCTATCAACAACATTAAGTGGGGACTTACTGTACTTTATCTCCAATTCTCCAGTCTTTTCATATCAATTAG  
AATTCACCTTTCTGCACCTT

In100 candidate3789 (in intron):

LOCUS ENSG00000083097

DESCRIPTION dopey family member 1 [Source:RefSeq\_peptide;Acc:NP\_055833]

CTTCCCACATATGGCTTCTCCATCTCTTAACCATTTTTTCATATTTTCTAACTTTTTGTCCTTATGTGCTTCATTCTCAGGA  
ATTTCTTCTGACCTAGTTTC

In100 candidate3790 (in intron):

LOCUS ENSG00000169641

DESCRIPTION Leucine zipper protein 1.

[Source:Uniprot/SWISSPROT;Acc:Q86V48]EXON

TAAAATGGATTGGTCACTTCTGGTCTTGACTCTGGTTAAATCTATAACAAGTAAAAAGTCTTATGTTGTTTTTCAGAGTGG  
ACTTTCTTAATTTTTATTTT

In100 candidate3791 (in intron):

LOCUS ENSG00000125944

DESCRIPTION Heterogeneous nuclear ribonucleoprotein R (hnRNP R).

[Source:Unprot/SWISSPROT;Acc:O43390]

TGTTTCTTTTCTCTTGATAAAAAGGTTATAACTTGATAAAAAGTTGTTATAACTGCTTTCCTCCTTTTGAATATTCAGTT  
ACCTCAGTTTCTTTATTTAT

In100 candidate3792 (in intron):

LOCUS ENSG00000203877

DESCRIPTION OTTHUMP00000016800 (Chromosome 6 open reading frame 159).

[Soure:Uniprot/SPTREMBL;Acc:Q5TAB7]

GCTGTTTCATAATATTCTCTTATCTTTTTTAACATCCATAAGATCTGTAGTGGTCTCCCCTCTTTAATTTCTGTTATCAGTA  
ATTTGTGTCCTCTTTTTTTTT

In100 candidate3793 (in intron):

LOCUS ENSG00000203877

DESCRIPTION OTTHUMP00000016800 (Chromosome 6 open reading frame 159).

[Source:Uniprot/SPTREMBL;Acc:Q5TAB7]

CACTTTCCACAATGGTTATGCTAATTAACTCCCAATGTGTATAAGTGTTTCCTTTCTCCTTGACCTGCCAGCC  
TCTGTTATTTTTTTAGTTTT

In100 candidate3794 (in intron):

LOCUS ENSG00000203877

DESCRIPTION OTTHUMP00000016800 (Chromosome 6 open reading frame 159).

[Source:Uniprot/SPTREMBL;Acc:Q5TAB7]

GCTCTGGAAGCATTTATCTTTTCATTTAAGACCATTTATAACTAGAACTAAGCTTTAGTGCTTAGTTCCTTCAGCTGAC  
TTTAGTCTTCCATGATTTCT

In100 candidate3795 (in intron):

LOCUS ENSG00000065615

DESCRIPTION cytochrome b5 reductase 4

[Source:RefSeq\_peptide;Acc:NP\_057314]EXON

TGGTCTGTTTTACTTTCTACATATTGAACTTCCTTAACTGTTCTTCTAATTATCTTATCTTTTCTCTTATTTTCAGTT  
TTGTCCTTTTGTTCTACTTT

In100 candidate3796 (in intron):

LOCUS ENSG00000135317

DESCRIPTION Sorting nexin-14. [Source:Uniprot/SWISSPROT;Acc:Q9Y5W7]

AGATTCTGTACGTTTTTCCTATTTGGTGTCTAACTCATGTCTTCCTCTTCATTCCCTTTACTGTTTCCTTAGTTCAGTTT  
TCATTGCCTCTTATTTGAAC

In100 candidate3797 (in intron):

LOCUS ENSG00000188822

DESCRIPTION Cannabinoid receptor 2 (CB2) (CB-2) (CX5).

[Source:Uniprot/SWISPROT;Acc:P34972]

CCTTCATAACTCTTAACTTCTCTTTCTTGTTTTCCATCACTTTATCTCTTTGTTCTGCATTGTGAGAAATTTCTTCAGAG  
CTACATTCTTTTTTTTTTTTTT

In100 candidate3798 (in intron):

LOCUS ENSG00000168830

DESCRIPTION 5-hydroxytryptamine 1E receptor (5-HT-1E) (Serotonin receptor 1)

(5- HT1E) (S31). [Source:Uniprot/SWISSPROT;Acc:P28566]

ACATTTTATTATTATAATTTCTACTTTAACAAGTAACTATACCTTTCACTGTGTTTTATTTAGCACCTTTCACAGTGTTG  
TTGTCTTTTTTAATATACCT

In100 candidate3799 (in intron):

LOCUS ENSG00000164414

DESCRIPTION Uncharacterized protein C6orf165.

[Source:Uniprot/SWISSPROT;AccQ8IYR0]

TATCTTCCACAATGGTTGAACTAATTTACTCCCACTAACTATAAAAGCATTGCTATTTCTTCACAGCCTCACCAGCAT  
CTGTTGTTTCTTCACTTTTT

In100 candidate3800 (in intron):

LOCUS ENSG00000164414

DESCRIPTION Uncharacterized protein C6orf165.

[Source:Uniprot/SWISSPROT;AccQ8IYR0]

TCTATTATATAGCTACCATATTTGAATTCAATTATAACCTCCTTAAGCCTTTTGGTATTTGCTTCCTCACAGCCTTTTAT  
TTTAATTAAGTTCATACTTT

In100 candidate3801 (in intron):

LOCUS ENSG00000146282

DESCRIPTION Probable arginyl-tRNA synthetase, mitochondrial precursor (EC  
61.1.19) (Arginine--tRNA ligase) (ArgRS) (Arginyl-tRNA synthetase-like).

[Source:Uniprot/SWISSPROT;Acc:Q5T160]

CTGACTGTAACATTTTTATTTTATAAACTTTTCATTTTTTAACTTTTTTCTTCTATTTATTTTTCTTTATATCTCAGCT  
TGTTTAACTTTTCAGCTGTT

In100 candidate3802 (in intron):

LOCUS ENSG00000146282

DESCRIPTION Probable arginyl-tRNA synthetase, mitochondrial precursor (EC  
61.1.19) (Arginine--tRNA ligase) (ArgRS) (Arginyl-tRNA synthetase-like).

[Source:Uniprot/SWISSPROT;Acc:Q5T160]

AATAATTTCCACCTTATAAACATTAAATAACTGTATTTTTACTAGTTATCTGCTCTCAGTGGCTTAGTTTTCAAATTCT  
TAATCCACATCTCCTTTTTC

In100 candidate3803 (in intron):

LOCUS ENSG00000111880

DESCRIPTION mRNA capping enzyme (HCE) (HCAP1) [Includes: Polynucleotide 5'-triphosphatase (EC 3.1.3.33) (mRNA 5'-triphosphatase) (TPase); mRNA guanylyltransferase (EC 2.7.7.50) (GTP--RNA guanylyltransferase) (GTase)].  
[Source:niprot/SWISSPROT;Acc:O60942]

AGCCTAAGTCCTTAACAACATGATGGGTGTGTGTCTTCCATGCCATTTTTGCAGATGATGTCATCATTTGCTTTTTATT  
GATCTTCCCTTTTGTGTTGATT

In100 candidate3804 (in intron):

LOCUS ENSG00000111880

DESCRIPTION mRNA capping enzyme (HCE) (HCAP1) [Includes: Polynucleotide 5'-triphosphatase (EC 3.1.3.33) (mRNA 5'-triphosphatase) (TPase); mRNA guanylyltransferase (EC 2.7.7.50) (GTP--RNA guanylyltransferase) (GTase)].  
[Source:niprot/SWISSPROT;Acc:O60942]

CTCTTTGTTAACCTGAACTGTCTATTAACCTTTTCATTATATTATTGGTTACCTTTCCTTTCCTTATATTCATAATCAGAT  
ATATTTCTCTGTTATTACTT

In100 candidate3805 (in intron):

LOCUS ENSG00000111880

DESCRIPTION mRNA capping enzyme (HCE) (HCAP1) [Includes: Polynucleotide 5'-triphosphatase (EC 3.1.3.33) (mRNA 5'-triphosphatase) (TPase); mRNA guanylyltransferase (EC 2.7.7.50) (GTP--RNA guanylyltransferase) (GTase)].  
[Source:niprot/SWISSPROT;Acc:O60942]

GAAATTACTTTTTTTTTTAACCTGACCTGTTTCTTGTTTTTTTTGTATTATTTTTGTTTTTATTCACCTTCTACATACAGTA  
ATTCACCTCCTTTTGGTGTTT

In100 candidate3806 (in intron):

LOCUS ENSG00000111880

DESCRIPTION mRNA capping enzyme (HCE) (HCAP1) [Includes: Polynucleotide 5'-triphosphatase (EC 3.1.3.33) (mRNA 5'-triphosphatase) (TPase); mRNA guanylyltransferase (EC 2.7.7.50) (GTP--RNA guanylyltransferase) (GTase)].  
[Source:niprot/SWISSPROT;Acc:O60942]

AGATTTTAAAAAGCAATGTTTCATTGCCTAATTTTATATTTGGTTAACAATTTTACTGATTGTTCTATGTCCCAGGCACT  
TTCAATTATTATTCTTTTCAG

In100 candidate3807 (in intron):

LOCUS ENSG00000117616

DESCRIPTION Clorf63 protein. [Source:Uniprot/SPTREMBL;Acc:Q49AA4]

AAATGGGCATTTCTAACTCCAAGTTTGCTAAGACTTTTGTTTCTAAATATTATTTTCCCTCTGCCTGTTCCCTTCAGAC  
CTATTTGAGATTCTTTTTCA

In100 candidate3808 (in intron):

LOCUS ENSG00000135299

DESCRIPTION Ankyrin repeat domain-containing protein 6.

[Source:Uniprot/SWISPROT;Acc:Q9Y2G4]

AGCTATTTCTTCTATATGTAAGTCTGTTTACATTCTTTTCATATTTTACTTCCAGTGTTAATCACTTTTCATTTCTTTGC  
TACACTTTCATCTTTGTTGG

In100 candidate3809 (in intron):

LOCUS ENSG00000135299

DESCRIPTION Ankyrin repeat domain-containing protein 6.

[Source:Uniprot/SWISPROT;Acc:Q9Y2G4]

AGCCTCCCATATTCTTATTGTTAACATTAAATTACACTTGCCTTAAATCTCTTTTTATTCAGTTTCTTCATTGGTTGTTA  
GATGTTTGTAACCTTTTTTCC

In100 candidate3810 (in exon):

LOCUS ENSG00000112182

DESCRIPTION Transcription regulator protein BACH2 (BTB and CNC homolog 2).

Source:Uniprot/SWISSPROT;Acc:Q9BYV9]

CATTCCTCTTCTTTTGTCTCTGATGCTAGAACTAGTTTGGTAACTGTTAACATGGTCATTTTTCTTGCTTCACAGTTCAA  
TTTTCAATTCGTACTTATTT

In100 candidate3811 (in intron):

LOCUS ENSG00000135341

DESCRIPTION Mitogen-activated protein kinase kinase kinase 7 (EC  
2.7.11.25)(Transforming growth factor-beta-activated kinase 1) (TGF-  
betaactivated

knase 1). [Source:Uniprot/SWISSPROT;Acc:O43318]

TGAGGCTATTATCTTAGTTACCTGCCTTAACTAATGAAAAAATCACTTAGCCTTTTTTCTTCATTGTGAATATTCAGTC  
ATCCTTTTTCCACTATATTA

In100 candidate3812 (in intron):

LOCUS ENSG00000135333

DESCRIPTION Ephrin type-A receptor 7 precursor (EC 2.7.10.1) (Tyrosine-protein



kinase receptor EHK-3) (EPH homology kinase 3) (Receptor protein- tyrosie kinase HEK11). [Source:Uniprot/SWISSPROT;Acc:Q15375]

GTAGCTTTTCTGGGAGTAGTTGGTGAGCTCGTCTAACTTTCCTGTATGTATGTATCTCTCAGATATGCCACTTTACCCTG  
CTTTATCTCATTGAGTATTT

In100 candidate3813 (in intron):

LOCUS ENSG00000112214

DESCRIPTION Four and a half LIM domains protein 5 (FHL-5) (Activator of  
cAMresponsive

element modulator in testis) (Activator of CREM in testis).

[Surce:Uniprot/SWISSPROT;Acc:Q5TD97]

TTTATTTTTGTGTAAGTGCATGTTAGTCGAGGTCTTTGCTCCTTATTCTTTCTTTTTGTCTTCAGTTTTCTAAACCTTC  
CGTTAGAGAGTTTCCTTTTT

In100 candidate3814 (in intron):

LOCUS ENSG00000112214

DESCRIPTION Four and a half LIM domains protein 5 (FHL-5) (Activator of  
cAMresponsive

element modulator in testis) (Activator of CREM in testis).

[Surce:Uniprot/SWISSPROT;Acc:Q5TD97]

TTAACCTTTCTAGTTTCCTGCTTTCTTTTTAGTTTTAGCCTCTGAGATTTTCCTTACTTTCTTGCCAGTTCGGCAACAC  
ATTTTATTTTGTCGTTTTT

In100 candidate3815 (in intron):

LOCUS ENSG00000186231

DESCRIPTION Kelch-like protein 32 (BTB and kelch domain-containing protein ).

[Source:Uniprot/SWISSPROT;Acc:Q96NJ5]

ATACTTTGTATTTCTGAATTTTATGAAATGAGCATTTATTACTTTTTATAACTAGAAATGGCACTCTTTCTATAACAGCA  
GTAATTTTGTTCATCC

In100 candidate3816 (in intron):

LOCUS ENSG00000186231

DESCRIPTION Kelch-like protein 32 (BTB and kelch domain-containing protein ).

[Source:Uniprot/SWISSPROT;Acc:Q96NJ5]

AGTAGCTAACTCTACTGACTGATTATTTTCCTGATGCCTTCTGCCTTATTTTCATTATTTGTGTTACTTTAATCAGTAAC  
TTCCCTCTTCATTATTGCTT

In100 candidate3817 (in intron):

LOCUS ENSG00000186231

DESCRIPTION Kelch-like protein 32 (BTB and kelch domain-containing protein ).

[Source:Uniprot/SWISSPROT;Acc:Q96NJ5]

TGGGTTTTTCTAGTATTAATTAATAAATAATGTAAAATTTTATTAACATTTAAAAATATAATTGCCTTATCTTTTGCAGAT  
ATTGTTTTACTTACATCTTG

In100 candidate3818 (in intron):

LOCUS ENSG00000130695

DESCRIPTION Coiled-coil domain-containing protein 21.

[Source:Uniprot/SWISSROT;Acc:Q6P2H3]

CCTCCATTCACCTCCCTTTCTAAGCTTTATAACTGGTGTGTTACTTCTTGTACATTCATTCTCTCATTTTTATCCCAGGA  
AATTCTGTCTCCTTCAGTT

In100 candidate3819 (in intron):

LOCUS ENSG00000112249

DESCRIPTION Activating signal cointegrator 1 complex subunit 3 (EC 3.6.1.-  
) (ASC-1 complex subunit p200) (Trip4 complex subunit p200) (Helicase, ATP binding  
1). [Source:Uniprot/SWISSPROT;Acc:Q8N3C0]

AAGTCTGTTATTTTGGCTTTCCCCCTCATAGTTTACCTCTTGTAATAACCTTGTCTAGGTCCTTTAAGTCTCAGCTCAAG  
CTCAGCTTCCTTCTTTATAT

In100 candidate3820 (in intron):

LOCUS ENSG00000112249

DESCRIPTION Activating signal cointegrator 1 complex subunit 3 (EC 3.6.1.-  
) (ASC-1 complex subunit p200) (Trip4 complex subunit p200) (Helicase, ATP binding  
1). [Source:Uniprot/SWISSPROT;Acc:Q8N3C0]

TTCTCAAACCTGTTTTTTTTTTAACTTTTGATTCTACTCATTTTTTGATGCTTAATACTACTCATTGTTTCCTCAGTCTTG  
AAACTCTTTGCTCTTTGACT

In100 candidate3821 (in intron):

LOCUS ENSG00000112249

DESCRIPTION Activating signal cointegrator 1 complex subunit 3 (EC 3.6.1.-  
) (ASC-1 complex subunit p200) (Trip4 complex subunit p200) (Helicase, ATP binding  
1). [Source:Uniprot/SWISSPROT;Acc:Q8N3C0]

TTAAATCTGTAGATCAATTTGGGAGAATTAAGGTATAACCCTTCATTTAGTTGGATCCTCTTTATTTTTTCCTAGCAGTG  
TTTTCTTTGTTTTGTTTTCA

In100 candidate3822 (in intron):

LOCUS ENSG00000117713

DESCRIPTION AT-rich interactive domain-containing protein 1A (ARID  
domainontaining

protein 1A) (SWI/SNF-related, matrix-associated, actindependentregulator  
of chromatin subfamily F member 1) (SWI-SNF complex protein

p270)(B120) (SWI-like protein) (Osa homolog [Source:Uniprot/SWISSPROT;Acc:O14497  
CTATGTCTGATTAACAAGTTCCTAAATGGTCTCTACCTCTTCTCATTTCCCACTTTATTGTCTTTGGTCTGGAGACAGAT  
TCCTTCATCTGTTTTTGGGG

In100 candidate3823 (in intron):

LOCUS ENSG00000164418

DESCRIPTION Glutamate receptor, ionotropic kainate 2 precursor (Glutamate  
rceptor 6) (GluR-6) (GluR6) (Excitatory amino acid receptor 4) (EAA4).

[Soure:Uniprot/SWISSPROT;Acc:Q13002]

AGGAGATTCAACTTGCAATAAAATTCATAACAAGTGCTATGAATCTTGCTCTATCCAAATTTTTTTTCTTCAGAATTTTT  
TTTATTTTTTTTTTATTATAC

In100 candidate3824 (in intron):

LOCUS ENSG00000164418

DESCRIPTION Glutamate receptor, ionotropic kainate 2 precursor (Glutamate  
rceptor 6) (GluR-6) (GluR6) (Excitatory amino acid receptor 4) (EAA4).

[Soure:Uniprot/SWISSPROT;Acc:Q13002]

TAGTCTAATATTTGAAAATAATAAAACTGATTATAATAAACATG TTCATAACATGCACTGTTAATTATTCTTTCCAGAT  
TTCTACTGACTTTTAAATTTT

In100 candidate3825 (in intron):

LOCUS ENSG00000164418

DESCRIPTION Glutamate receptor, ionotropic kainate 2 precursor (Glutamate  
receptor 6) (GluR-6) (GluR6) (Excitatory amino acid receptor 4) (EAA4).

[Source:Uniprot/SWISSPROT;Acc:Q13002]

ATTAAGCAATATATAATATTAGAGATTCTTGGTAAAGTAATAACACAAGGATAAATATTTTCTGGATTTTCTCAGAATAT  
TTTGTTCAATTTTCAATCTT

In100 candidate3826 (in intron):

LOCUS ENSG00000142784

DESCRIPTION WD and tetratricopeptide repeats protein 1.

[Source:Uniprot/SWISPROT;Acc:Q8N5D0]

TTGCTCATCTTACTCTGTCCCCTTCATCACAATGCTCTAACCACATTGGCTTTCATTCTGTTTCTTTGGCATTATCAGGC  
CTGTTATTTTTTATACTCATT

In100 candidate3827 (in intron):

LOCUS ENSG00000057663

DESCRIPTION Autophagy protein 5 (APG5-like) (Apoptosis-specific protein).

[ource:Uniprot/SWISSPROT;Acc:Q9H1Y0]

TGAGGTTAGAGAAGAATTTCTGTTTTTTAATATGTAACCAAGACTAGTTGGCCTTTCCTGTTTAGCATTTTTTTTCAGGT  
AATTTTAAATCTTTTAGTTT

In100 candidate3828 (in intron):

LOCUS ENSG00000130348

DESCRIPTION glutaminyl-tRNA synthase (glutamine-hydrolyzing)-like 1

[SourceRefSeq\_peptide;Acc:NP\_060762]

TGACGGAGTGAGACTCTGTCTCCAAAAAAAAAAAAAAAAACATATTTATAGTAACTGTTTTAATGTTCTTATCTACTCAGTA  
TTCCATCATTTTTTGCATCTG

In100 candidate3829 (in intron):

LOCUS ENSG00000164494

DESCRIPTION Decaprenyl-diphosphate synthase subunit 2 (EC 2.5.1.-) (Decaprenyl  
pyrophosphate synthetase subunit 2) (Candidate tumor suppressor protein)

[Source:Uniprot/SWISSPROT;Acc:Q86YH6]

CTTTTCTTGTTATCTGTTCCCTGTATTATTCAATTTAACCATACTTTGAATCTACTATTATAGCTCTTTTCTTACAGCT  
CGTATTTCTTTGTATACCCT

In100 candidate3830 (in intron):

LOCUS ENSG00000164494

DESCRIPTION Decaprenyl-diphosphate synthase subunit 2 (EC 2.5.1.-) (Decaprenyl  
pyrophosphate synthetase subunit 2) (Candidate tumor suppressor protein)

[Source:Uniprot/SWISSPROT;Acc:Q86YH6]

AGCAAATAACTTGGTCTCTGGCTTTTTTGGAGTCTGTCTCAGGTCTTTTCTCCCCAGTTAAGGATTTTTTTTCCTTCACT  
GCCTCTTCTTTGATTTTGA

In100 candidate3831 (in intron):

LOCUS ENSG00000080546

DESCRIPTION Sestrin-1 (p53-regulated protein PA26).

[Source:Uniprot/SWISSPRT;Acc:Q9Y6P5]

GGTGTGAGCCACCATACCTGGCCACTTCTTTGTAAACAATAAGTTGACCATATTTTTATCAGTCTATTTCTGGGCTCTCT  
ATTCTGTTCCATTGATATGT

In100 candidate3832 (in intron):

LOCUS ENSG00000080546

DESCRIPTION Sestrin-1 (p53-regulated protein PA26).

[Source:Uniprot/SWISSPRT;Acc:Q9Y6P5]

TCATCTTAACATGTCTTTTATTTTCTCTCTCATAAATTCATTTCTTTGCTGTATGTGCTATATTCTGGACTCTTCAGAT  
TTACTTTCTAGTTTACTAAT

In100 candidate3833 (in intron):

LOCUS ENSG00000080546

DESCRIPTION Sestrin-1 (p53-regulated protein PA26).

[Source:Uniprot/SWISSPRT;Acc:Q9Y6P5]

ACTGAAACTTATTTTCATTTATGAGTCCTGTTCTGTGGCCATAACTACTGCTATAAATTCCACTTGTTTCCTTGTCAGAA  
TGTTCCAACCTTTTTTTGTTT

In100 candidate3834 (in intron):

LOCUS ENSG00000158161

DESCRIPTION Eyes absent homolog 3 (EC 3.1.3.48).

[Source:Uniprot/SWISSPROT;cc:Q99504]

TATTTTGGTAACTCCACATCTTTTGCATTTTCTTCTCACAAACATTAGCCTTCTTTTGTTAGTTTTCATATACAGCC  
TGAGTCTCTTTATCTTTTCC

In100 candidate3835 (in intron):

LOCUS ENSG00000112365

DESCRIPTION Zinc finger and BTB domain-containing protein 24 (Zinc finger  
potein 450). [Source:Uniprot/SWISSPROT;Acc:O43167]

CTCTCTAACTTTATTTTCTCTTATATTTCCATCATTTTGGCCCCACCCTCTGGGGGATTCCACTTTGTTTTTCAGCC  
CTTTGAGGTTTTCTGTTTCA

In100 candidate3836 (in intron):

LOCUS ENSG00000112367

DESCRIPTION SAC domain-containing protein 3.

[Source:Uniprot/SWISSPROT;Acc:92562]

GTTAGGTGCTTTGTGAACGAACATTTTCTCGCTTATTCTTGTGCCTGTAACAAACATACCATCTTCTTCCCTTTTCAGTT  
CTTTGCAATTGCTATTTTCCT

In100 candidate3837 (in intron):

LOCUS ENSG00000168438

DESCRIPTION Pre-mRNA-processing factor 17 (PRP17 homolog) (hPRP17) (Cell  
diision cycle 40 homolog) (EH-binding protein 3) (Ehb3).

[Source:Uniprot/SWISPROT;Acc:O60508]

TCTTTTTTTTGTATAGTTTTATTTAATAACCCTAGGCTTCTCACCCCTTAATCTTCTTTATTCTGTAATTACCACAGAT



AAGTCTCTTTCTCCTATTTC

In100 candidate3838 (in intron):

LOCUS ENSG00000159023

DESCRIPTION Protein 4.1 (Band 4.1) (P4.1) (EPB4.1) (4.1R).

[Source:Uniprot/WISSPROT;Acc:P11171]

TCTACGCACTAACTGCTTATAACTGCTTAGTTGATCTTCTTCCCTCTAGTCTTTTTCCTTTTGCCATATTCATTCCAGTT

TATCTTGCCATACTCATCTT

In100 candidate3839 (in intron):

LOCUS ENSG00000009413

DESCRIPTION DNA polymerase zeta catalytic subunit (EC 2.7.7.7) (hREV3).

[Source:Uniprot/SWISSPROT;Acc:O60673]

TAGTTGTTTAGCTTAGTGCCATTCTAAATTGAATCTCTTTATTTGTTGTAACATTAAACCTTTCTTCTCTTCGGACAGTTT

TGGCCTTGGCTTAACTTCCT

In100 candidate3840 (in intron):

LOCUS ENSG00000009413

DESCRIPTION DNA polymerase zeta catalytic subunit (EC 2.7.7.7) (hREV3).

[Source:Uniprot/SWISSPROT;Acc:O60673]

TATCCTATGCTTTGTCTAACCCCCATACCTTTGCTTAAACTGTTCCCTCTGTTTTTTTGTCTGCTTTACCTTTTCCAGTC

TCCTTTTCCTATGTCTGTTA

In100 candidate3841 (in intron):

LOCUS ENSG00000009413

DESCRIPTION DNA polymerase zeta catalytic subunit (EC 2.7.7.7) (hREV3).

[Sorce:Uniprot/SWISSPROT;Acc:O60673]

TTAACATCTATGGTTGTTTCTTAGAATTCTGCCTTAGACTTTCATCTTTACTCTGTATATTTTCTGTTCCCTCTACAGAC  
TTATTTACTCCCATGGGTTT

In100 candidate3842 (in intron):

LOCUS ENSG00000009413

DESCRIPTION DNA polymerase zeta catalytic subunit (EC 2.7.7.7) (hREV3).

[Sorce:Uniprot/SWISSPROT;Acc:O60673]

AGTCCTAATATCCTTTCTAACTGCCATAATTTTTTTTCTTTTCCATCACTGTCAACCTTCTTGAAGCAGAGGTTAGCATT  
TTTTGTCTCTTAGTTCACTT

In100 candidate3843 (in intron):

LOCUS ENSG00000112769

DESCRIPTION Laminin subunit alpha-4 precursor.

[Source:Uniprot/SWISSPROT;Ac:Q16363]

TATTAATAAATATTTGTAACATTTTGTTTCTTTTGTCCCTTTTTTAAAAAATGTTTTCTTGTCTGCCTTCCCCAGATTTT  
GCTATCTGAGGCCATTTTCT

In100 candidate3844 (in intron):

LOCUS ENSG00000111816

DESCRIPTION Tyrosine-protein kinase FRK (EC 2.7.10.2) (FYN-related kinase)

Nuclear tyrosine protein kinase RAK). [Source:Uniprot/SWISSPROT;Acc:P42685]EXON

TTTTTCCATTCAATTCTACTTTACTCTTTGCAATAACCCTGTGAAGAATGTACTATTATTACCCCCTTTTTAACTCAGAT

GAGTTTCCTCATCTCAGTTT

In100 candidate3845 (in intron):

LOCUS ENSG00000111816

DESCRIPTION Tyrosine-protein kinase FRK (EC 2.7.10.2) (FYN-related kinase)

Nuclear tyrosine protein kinase RAK). [Source:Uniprot/SWISSPROT;Acc:P42685]EXON

CTTTGTCAATTACAACCCACACTATCCCAAATTTTATGATAACTGCTTCCCATTACTTTATGTTTACCTCTACCAGAA

CCTTCTTGTCTTCCTTCTTG

In100 candidate3846 (in intron):

LOCUS ENSG00000178425

DESCRIPTION 5'-nucleotidase domain-containing protein 1.

[Source:Uniprot/SWSSPROT;Acc:Q5TFE4]

TACCTTTGTCACATCTAAGAAACCAACATTGGCACATTCCTATTAATAACCACAAGACTTCATTTAGCTTCTACCAGTT

TTTATACTAATGTCCTTTTC

In100 candidate3847 (in intron):

LOCUS ENSG00000160062

DESCRIPTION Zinc finger and BTB domain-containing protein 8.

[Source:Unipro/SWISSPROT;Acc:Q8NAP8]

GTATGCAAATTATCAATTTATCATCACTTAACTTCAAACCTAAGCTTTTTTTGGCCCTGCTTTGTGCAACCAGCTGGACTC  
TATAAACATTTCTTCTTTCC

In100 candidate3848 (in intron):

LOCUS ENSG00000160062

DESCRIPTION Zinc finger and BTB domain-containing protein 8.

[Source:Unipro/SWISSPROT;Acc:Q8NAP8]

GGAAAAGACGCAACTTGCTATTTTTACTAATTTTATATTTCTCTGGACTTAACTAAGAATTATGTTCTCTTATCTCAGCC  
TCTCTGGGTTTTTCCTATTCA

In100 candidate3849 (in intron):

LOCUS ENSG00000162521

DESCRIPTION Histone-binding protein RBBP4 (Retinoblastoma-binding protein 4  
(RBBP-4) (Retinoblastoma-binding protein p48) (Chromatin assembly factor  
1subunit C) (CAF-1 subunit C) (Chromatin assembly factor I p48 subunit) (CAFI 48  
kDa subunit) (CAF-I p48) (Nucleoso [Source:Uniprot/SWISSPROT;Acc:Q0902]

AAAACCACGGTTGTAGTTCTGTAACACTGTCCTCTCCTTCATTCTTTTTCTGGTTCTTGTCTAACCTTCTACATACAGGT  
AATTCCAATTTTCTGTTCAT

In100 candidate3850 (in intron):

LOCUS ENSG00000047936

DESCRIPTION Proto-oncogene tyrosine-protein kinase ROS precursor (EC 2.7.101)  
(c- ros-1). [Source:Uniprot/SWISSPROT;Acc:P08922]

CACTTATATTACACATATATGTATATATTTTCATGCAAACCTAGATAACTACCTGTAATTTTTCTTTTCATTTCTTACAGTT  
TTATGGTCCTTTACTCACCT

In100 candidate3851 (in intron):

LOCUS ENSG00000116514

DESCRIPTION IBR domain-containing protein 3.

[Source:Uniprot/SWISSPROT;Acc:6ZMZ0]

AAGTAACACATTGAGCCATTTCTCTGTGCCAGGCTTGTGCCACGTATCATCTTATTTTGATTTAATTGTCAATGGTTTTG  
TTTTGTTTTGTTTTTACTTT

In100 candidate3852 (in intron):

LOCUS ENSG00000196376

DESCRIPTION solute carrier family 35, member F1

[Source:RefSeq\_peptide;Acc:P\_001025029]

GAATAACAATCTTTAATATTTTGCTTCCACTGTCTAAACTCCCTCTGGAGTTTGTTTCTTTGTACTTTCCCTCAGAATAT  
GGCTCTTCTGCTCATGTTTT

In100 candidate3853 (in intron):

LOCUS ENSG00000196376

DESCRIPTION solute carrier family 35, member F1

[Source:RefSeq\_peptide;Acc:P\_001025029]

AATAGAGAGCACCTGTGAATCTTGTAATATTGTTTTAACTTAAGAACTCATCTTATTTCTGTCTTATTTCCAGACATT  
TGTTTCTCAGAGTCCCTATT

In100 candidate3854 (in intron):

LOCUS ENSG00000196376

DESCRIPTION solute carrier family 35, member F1

[Source:RefSeq\_peptide;Acc:P\_001025029]

AGCCAAGAAAATTGTAGTAACCTCTCAATATTATCTTTTCTAACTATACTTTCAGTTTCTTTAACTTTTCTTCCTGGGTT  
CTGTTTTCAAATATTAGCTA

In100 candidate3855 (in intron):

LOCUS ENSG00000111860

DESCRIPTION C6orf204 protein. [Source:Uniprot/SPTREMBL;Acc:Q2TAM2]

ATGGAAGCTTAGGTTGAGAGCTTTTTCCCTTTTTCTAATATAACTGCTTAGTGCTGTAAATTCCTTCTCAGTACTGCTT  
TACCTGCTTCCTTAAAATTT

In100 candidate3856 (in intron):

LOCUS ENSG00000111860

DESCRIPTION C6orf204 protein. [Source:Uniprot/SPTREMBL;Acc:Q2TAM2]

TTGGTTATCTTTAACATTTATTTTCCATTTACATCTTTAAATAATCATTTTCTCTAAATCCTTTCACCCTGCTTCCAGTT  
TCTTCATTCTGTTCTCCATG

In100 candidate3857 (in intron):

LOCUS ENSG00000111879

DESCRIPTION Uncharacterized protein C6orf60.

[Source:Uniprot/SWISSPROT;Acc:8NB25]

GTAATTAGTTCAATAACATCCCCTCCTTTTTTTTTTTTTTACTTTTCCATCTTCCTTCTCTCAGTAAGCTTACTCCTTCATT  
CCTACTTTCTGGAGTCATTT

In100 candidate3858 (in intron):

LOCUS ENSG00000111885

DESCRIPTION Mannosyl-oligosaccharide 1,2-alpha-mannosidase IA (EC 3.2.1.113  
(Processing alpha-1,2-mannosidase IA) (Alpha-1,2-mannosidase IA) (Mannosidse  
alpha class 1A member 1) (Man(9)-alpha-mannosidase) (Man9-mannosidase).

Source:Uniprot/SWISSPROT;Acc:P33908]

AGTGCAAAGCTGCTGGGCTGTGGGCTAACTGTGGCTCACGGATTTTTTTTTTTTAAACCCTTAGCCAGCGTAGTTTTGATTTT  
TTTTTTTTTTTTTAAATAGCT

In100 candidate3859 (in intron):

LOCUS ENSG00000111885

DESCRIPTION Mannosyl-oligosaccharide 1,2-alpha-mannosidase IA (EC 3.2.1.113  
(Processing alpha-1,2-mannosidase IA) (Alpha-1,2-mannosidase IA) (Mannosidse  
alpha class 1A member 1) (Man(9)-alpha-mannosidase) (Man9-mannosidase).

Source:Uniprot/SWISSPROT;Acc:P33908]

AGCCTCCTCTTAACTTTTTTCTCCTTGCCTTTCTTGTCTTCTTCTCATGGCTTTTACTGCTTCACAGCCCTTCTCCTG  
TGTATTTGTACTTCTCTGTT

In100 candidate3860 (in intron):

LOCUS ENSG00000111885

DESCRIPTION Mannosyl-oligosaccharide 1,2-alpha-mannosidase IA (EC 3.2.1.113  
(Processing alpha-1,2-mannosidase IA) (Alpha-1,2-mannosidase IA) (Mannosidse

alpha class 1A member 1) (Man(9)-alpha-mannosidase) (Man9-mannosidase).

Source:Uniprot/SWISSPROT;Acc:P33908]

AAGTTACATCTTTCTAAGTATTTTAAGTTAACCTTCTTTATGGTTTCTTTTTCTTCCCCCAGTTGGATTTTTTTTAAATA  
TTGGGTTCCTCCACTTCCCTC

In100 candidate3861 (in intron):

LOCUS ENSG00000121904

DESCRIPTION CUB and sushi domain-containing protein 2 (CUB and sushi multiple domains protein 2). [Source:Uniprot/SWISSPROT;Acc:Q7Z408]

AAAGTAGCTCATTATTGCGTTCCTTTAATTATAACTGAACTAAGCATCTTTTCATGTTTCCCAGTTGTCTGTATCTCTT  
CTCCTGAAAACCTATCTGTTT

In100 candidate3862 (in intron):

LOCUS ENSG00000121904

DESCRIPTION CUB and sushi domain-containing protein 2 (CUB and sushi multiple domains protein 2). [Source:Uniprot/SWISSPROT;Acc:Q7Z408]

GTTCTTCTAGTTTTCTTTTTTCATAGACACTAATAGTAACATCTAACTGCTCAATTATTTCTTGCATATTTTTCTCAGTT  
TGAGTCTTGTCACCTTTTCC

In100 candidate3863 (in intron):

LOCUS ENSG00000146350

DESCRIPTION Uncharacterized protein C6orf170.

[Source:Uniprot/SWISSPROT;Acc:Q96NH3]

GTTACTATAGCTTTGTAATAAGTTAAAATAACTGATAGAGCAATTCTTCTTGCTTTGGTCTTTTCAAAAATATCTCAGCT  
ATTTTCTAGTCCTTTTCTTTC

In100 candidate3864 (in intron):



LOCUS ENSG00000146350

DESCRIPTION Uncharacterized protein C6orf170.

[Source:Uniprot/SWISSPROT;AccQ96NH3]

CCCCCAACCCATAATTCTCTAACATCTTATCCTACTTTAGTTTTTCTCACAGTTTTTATCACCATCCGAAATTATTTTAT  
ATGTGTTTTTGTCTGTCTTC

In100 candidate3865 (in intron):

LOCUS ENSG00000163867

DESCRIPTION Zinc finger MYM-type protein 6 (Zinc finger protein 258).

[Source:Uniprot/SWISSPROT;Acc:O95789]

ATTAACCATTTGTTAGATTGGTTTATTTGCTCAGTTTCTTTCCCTACCTTTTTCTTCTTTTTTAAAAAATTAACCACTA  
CTACCAGTTAGTCTCCCTTT

In100 candidate3866 (in intron):

LOCUS ENSG00000186439

DESCRIPTION Triadin. [Source:Uniprot/SWISSPROT;Acc:Q13061]

ATCATAGGCTGAACAAATATAAGATGTGTCATCCCAAGTTCCTGTAACAACCCTAAACTACTTTTACTGCCTTGTCAGTT  
CTATATTTGTGTTTCCCTTC

In100 candidate3867 (in intron):

LOCUS ENSG00000186439

DESCRIPTION Triadin. [Source:Uniprot/SWISSPROT;Acc:Q13061]

GTGTGTGTGTGTGTTTTGGGTATGTATACCCTTCATCTATAACTTATTTTCAAATATTTTCTGAATTGTTTCACAGTT  
AATATTATGCTTTCTGTCTT

In100 candidate3868 (in intron):

LOCUS ENSG00000186439

DESCRIPTION Triadin. [Source:Uniprot/SWISSPROT;Acc:Q13061]

GATGAATTCTATCTTCTATGTCTGTTAACCTCTTGTATATTTTCCATCTTTTGTCTCTGGGATGAATTCCAGGCTAT  
TTCTTCAGATATGTATTTCT

In100 candidate3869 (in intron):

LOCUS ENSG00000188580

DESCRIPTION T-cell lymphoma breakpoint associated target protein 1  
(ProteinFAM77B). [Source:Uniprot/SWISSPROT;Acc:Q5VXU1]

GTCTGATACTGTTGGCTAAAATTTCTAGAAAATTATAATAACAATTAGAAATGTGTTTTTCTTTTGGTCCAGATTTTATT  
AGAAATCTATCTTTTGT

In100 candidate3870 (in intron):

LOCUS ENSG00000188580

DESCRIPTION T-cell lymphoma breakpoint associated target protein 1  
(ProteinFAM77B). [Source:Uniprot/SWISSPROT;Acc:Q5VXU1]

TAAAAGTGTTAATGTGTTTAAATGTAGACATATAACATTTATTTACATTTTAAACCTCTGTTTGGCATTTTTTTCAGTT  
TTTTTATGTTTTTCAGGTGT

In100 candidate3871 (in intron):

LOCUS ENSG00000188580

DESCRIPTION T-cell lymphoma breakpoint associated target protein 1

(ProteinFAM77B). [Source:Uniprot/SWISSPROT;Acc:Q5VXU1]

ATCGAGGTTTTTAACGTTTGGGGACTTTTTTTTTTTTTTAATTTCTCCCTTTCATTTTCCTTTCATTTTGCATCACCAGTG  
CTTTCATTAGATTTTCTTTT

In100 candidate3872 (in intron):

LOCUS ENSG00000188580

DESCRIPTION T-cell lymphoma breakpoint associated target protein 1

(ProteinFAM77B). [Source:Uniprot/SWISSPROT;Acc:Q5VXU1]

AGTTCCAAGAGTTTCCCACCCTTCTTATAATCACAATAACTCTGAGTTTTTTCCTTTTCTTTCCTTTCCTCAGCCGTGGT  
ATATCTTTACTGCTTCTCTC

In100 candidate3873 (in intron):

LOCUS ENSG00000188580

DESCRIPTION T-cell lymphoma breakpoint associated target protein 1

(ProteinFAM77B). [Source:Uniprot/SWISSPROT;Acc:Q5VXU1]

TTTAACCCATGAACGTGGAACATCTTTCATTCTTTTGTGTCCTCTTCAATTTTCCTTCATCAATATTTTACAGTTTTTCATT  
ATAGGCATCTTTTACTACTT

In100 candidate3874 (in intron):

LOCUS ENSG00000188580

DESCRIPTION T-cell lymphoma breakpoint associated target protein 1

(ProteinFAM77B). [Source:Uniprot/SWISSPROT;Acc:Q5VXU1]

GGGCATTCATAGCTAACAAATACCATATTTTATTTTATCTTCCTGAGAGTTATTGACTTATCTTTATTTCTTACCCCAGCT  
TCTTCCTTTTTTCTCATTCT

In100 candidate3875 (in intron):

LOCUS ENSG00000111907

DESCRIPTION Tumor protein D53 (hD53) (Tumor protein D52-like 1).

[Source:Unprot/SWISSPROT;Acc:Q16890]

TTTCTCTGTCCTTTTTTTTCCCACTAGACTAAATAATAGATATGTATAACCCTTTTTTATATAGCTTATTTTCTGCAGTT  
TACTTTTGTGTTCTAAGTCT

In100 candidate3876 (in intron):

LOCUS ENSG00000146463

DESCRIPTION zinc finger protein 262 [Source:RefSeq\_peptide;Acc:NP\_005086]

GTGTCATATCTAACTTCTGTGCCTTTTAGCATTTTATTTTTTTCTGTCTCCAGATGTCTTTCTACCTGCTCTTCCTTCAA  
GAACCAGCTTTTTCTTTCTT

In100 candidate3877 (in intron):

LOCUS ENSG00000142687

DESCRIPTION polycystic kidney disease 1-like isoform a

[Source:RefSeq\_peptide;Acc:NP\_079150]

AATTGCTTACCATTACTTAGTTTCTTAAAATAACATGTAATGCTTTTTTCCATCTGGTCTTTGCCTCTATCTTTCCAGCT  
CATCTTCTATTACTTTTGCC

In100 candidate3878 (in intron):

LOCUS ENSG00000066651

DESCRIPTION Putative RNA methylase C6orf75 (EC 2.1.1.-).

[Source:Uniprot/SWSSPROT;Acc:Q7Z4G4]

AATGCTTCTTGAAAACTAGTATAACTTCTTGTCTCCTCTTCTTCATCTTTCACCTCTCTTCTGGCCATTATTTTCCAGCT  
TCTGTGCCTATCATTCTGTT

In100 candidate3879 (in intron):

LOCUS ENSG00000093144

DESCRIPTION Enoyl-CoA hydratase domain-containing protein 1.

[Source:Unipro/SWISSPROT;Acc:Q9NTX5]

AAAATCAAAGCTTAACATAACTTTTCCCTTCTTTCCCTTCTTCTCTTATATGTTTATCATCTTAAGGATAACAGATGGGT  
ATATCTTATGCCTTTCCCCT

In100 candidate3880 (in intron):

LOCUS ENSG00000126070

DESCRIPTION Eukaryotic translation initiation factor 2C 3 (eIF2C 3) (eIF-2C3)  
(Argonaute-3). [Source:Uniprot/SWISSPROT;Acc:Q9H9G7]

GAAACAAGTTCATCCATAATCCTACCACTCTAATGTAACCACTGTTAACATTTTGGTATACTATACTTCTTTCAGTCTTC  
ATCTGGTGTACATTTTACTT

In100 candidate3881 (in intron):

LOCUS ENSG00000172673

DESCRIPTION Uncharacterized protein C6orf190.

[Source:Uniprot/SWISSPROT;AccQ8N1K5]

ACATGTAACATTTTTTGAGACCATTTTCATTTTCAACAGTTGTTATGGTTTCCTTGGAAGTTTATTCTTTTATTCCTTTC  
TTCATTTACAGTTAACTTGC

In100 candidate3882 (in intron):

LOCUS ENSG00000152894

DESCRIPTION Receptor-type tyrosine-protein phosphatase kappa precursor (EC  
.1.3.48) (Protein-tyrosine phosphatase kappa) (R-PTP-kappa).

[Source:Unipro/SWISSPROT;Acc:Q15262]

AGGGTTATCAATTTCAATTGGGTCCAAATATAACTGGAAATTCTACTACTATATTTTTCTGTTTCAGTTATCTTTGTTCTT  
CTACTCTGTATTTCAACTCC

In100 candidate3883 (in intron):

LOCUS ENSG00000152894

DESCRIPTION Receptor-type tyrosine-protein phosphatase kappa precursor (EC  
.1.3.48) (Protein-tyrosine phosphatase kappa) (R-PTP-kappa).

[Source:Unipro/SWISSPROT;Acc:Q15262]

AGAGTTTACCAAATACCTAAGAGCTAACCCCAAGTGATGCTTATTAGTTTCAGTTTCTCTTGACCTCTTTCTTATGTTAG  
ATATTATTTGCCTTTACCTA

In100 candidate3884 (in intron):

LOCUS ENSG00000152894

DESCRIPTION Receptor-type tyrosine-protein phosphatase kappa precursor (EC  
.1.3.48) (Protein-tyrosine phosphatase kappa) (R-PTP-kappa).

[Source:Unipro/SWISSPROT;Acc:Q15262]

TGTAATCTTAACTATTAAAATTGGATTTTTTTTCTGGCTGTGTACATATTTCTGTCATTTTGCTTTCTCATCAACCAGTT  
AAAATATTTTTTTTTTCTGTT

In100 candidate3885 (in intron):

LOCUS ENSG00000196569

DESCRIPTION Laminin subunit alpha-2 precursor (Laminin M chain) (Merosin heavy  
chain). [Source:Uniprot/SWISSPROT;Acc:P24043]

ATGACGCTAACACCAAATCATGAAGTAAATGAATTTTTTCTTTTTCTCCTCTTCCTCTCAGTCCCTGCCCCTTTTCAGT  
TATGTGTGAATATTCTCATT

In100 candidate3886 (in intron):

LOCUS ENSG00000196569

DESCRIPTION Laminin subunit alpha-2 precursor (Laminin M chain) (Merosin heavy  
chain). [Source:Uniprot/SWISSPROT;Acc:P24043]

ATTTTCATTTTCATATCATTTTTCTTCTTCATTAATACTACTTCCTAATCTTTATCATTTTATTCCTGTTGTTTCAGGTCTG  
CTGACAATAATTTTTTCCTT

In100 candidate3887 (in intron):

LOCUS ENSG00000196569

DESCRIPTION Laminin subunit alpha-2 precursor (Laminin M chain) (Merosin heavy  
chain). [Source:Uniprot/SWISSPROT;Acc:P24043]

ATCTGTAAAGCAAGGTCCTTTATTTCTCTTCTCTTCTAATTAAGTAGATGCTCTTACATATTCTTCCAGCTGACACTTTT  
ATGCACTATTTTAATCTCTT

In100 candidate3888 (in intron):

LOCUS ENSG00000196569

DESCRIPTION Laminin subunit alpha-2 precursor (Laminin M chain) (Merosin heavy  
chain). [Source:Uniprot/SWISSPROT;Acc:P24043]

TCAAATGCAAGGATCGCATTCACACAAGATAACATTCAATGTTGCATTCTTGCTGCCATGTTTATTTTTTGTCTCAGGTGGT  
TTTTTTAAATTATTATTTTC

In100 candidate3889 (in intron):

LOCUS ENSG00000196569

DESCRIPTION Laminin subunit alpha-2 precursor (Laminin M chain) (Merosin heavy  
chain). [Source:Uniprot/SWISSPROT;Acc:P24043]

TTAGCTCATATACATGAGCTAATAATATTGAAATATTACCATTAACCCAAGACTGTATTCATATTTTTTCAGTGTTTACT  
GAATGTTTTTTTTTACTGTTTC

In100 candidate3890 (in intron):

LOCUS ENSG00000146376

DESCRIPTION Rho GTPase-activating protein 18 (MacGAP).

[Source:Uniprot/SWISSPROT;Acc:Q8N392]

AGCCTGGTTACCTCCTGAGTCATCTTACATTTTCATAGCTAACTGACCCATCTCTTTATTTTCCTAATTTTCAGTTTTTTGTT  
TTTTGTTTTTTTTTATTGA

In100 candidate3891 (in intron):

LOCUS ENSG00000146376

DESCRIPTION Rho GTPase-activating protein 18 (MacGAP).



[Source:Uniprot/SWISPROT;Acc:Q8N392]

GAGGAGGCAAAAGTCACTTATATTATTAATATAATACTACTCTAGAGCTAACCACAATTGAATTTTATTTTGCCTCAGTA  
TTTTTTTCCCATGCACATTC

In100 candidate3892 (in intron):

LOCUS ENSG00000146376

DESCRIPTION Rho GTPase-activating protein 18 (MacGAP).

[Source:Uniprot/SWISPROT;Acc:Q8N392]

TACTTTATAAATATCTTCTCCATTTATATTTTCTAACATAAACACAAATCTCCTTTCACTTTTAATATTTTCATCCAGTG  
TTTGTCTGTGTTTTTTCTTT

In100 candidate3893 (in intron):

LOCUS ENSG00000146376

DESCRIPTION Rho GTPase-activating protein 18 (MacGAP).

[Source:Uniprot/SWISPROT;Acc:Q8N392]

TAGTAACTCTGGCTTTTCTCTTTGGCTCTCTACAGAAGTAAGTGACTGAATTATCTCTTGTAACACACTTAATTCCTTTT  
CTCTGCTTTCTTTCCCTTCC

In100 candidate3894 (in intron):

LOCUS ENSG00000146376

DESCRIPTION Rho GTPase-activating protein 18 (MacGAP).

[Source:Uniprot/SWISPROT;Acc:Q8N392]

AATTCACATTAGTAATTTAAAAAATGGAATGAATTAACTTTGACCATGTTTTATATTTTACCCTTTTGTAATTATCAGTG  
AGTCTTAACCATCTCTTTTT

In100 candidate3895 (in intron):

LOCUS ENSG00000198945

DESCRIPTION Lethal(3)malignant brain tumor-like 3 protein (L(3)mbt-like 3  
potein) (H-1(3)mbt-like protein). [Source:Uniprot/SWISSPROT;Acc:Q96JM7]

GCATGTGCTGATGCTACTCTTTGCCCCATAACAAAAAGACACCCTTCTCTGATCTGTTTTCTCTAAGGGCAGATTCCT  
GGGTCATCTCTGATCTGTCT

In100 candidate3896 (in intron):

LOCUS ENSG00000198945

DESCRIPTION Lethal(3)malignant brain tumor-like 3 protein (L(3)mbt-like 3  
potein) (H-1(3)mbt-like protein). [Source:Uniprot/SWISSPROT;Acc:Q96JM7]

AGCAAGTTCTAACCATTTAAAATTTTTCTGTCTTCTTTTATGACATCATTCTCTAAATAGCCCAGCTATTTCTTTTTTTA  
ATTTTTATTTTTTTTGAGACA

In100 candidate3897 (in intron):

LOCUS ENSG00000198945

DESCRIPTION Lethal(3)malignant brain tumor-like 3 protein (L(3)mbt-like 3  
potein) (H-1(3)mbt-like protein). [Source:Uniprot/SWISSPROT;Acc:Q96JM7]

ATTGGAATCTTCTCTGCTTTCAAATCCTCTCTCCAAAAAGAGAAATAACTTTTAAGTAACTTTCTTGCTCCAGTTCTG  
TCCCTTGAAATCTTCTCTGT

In100 candidate3898 (in intron):

LOCUS ENSG00000198945

DESCRIPTION Lethal(3)malignant brain tumor-like 3 protein (L(3)mbt-like 3  
potein) (H-1(3)mbt-like protein). [Source:Uniprot/SWISSPROT;Acc:Q96JM7]

AGCCTATTTTTGTTTTATAGAGTTTATTTCCCCTTGTGCATTGCTAACGTCATGAAACTCTTCTGTCTATAACTCAGTG  
CTCTTCTTCTGATGTTTTCT

In100 candidate3899 (in intron):

LOCUS ENSG00000079819

DESCRIPTION Band 4.1-like protein 2 (Generally expressed protein 4.1) (4.1G.  
[Source:Uniprot/SWISSPROT;Acc:O43491]

TTTTGGTTTTATTTTCTGGTGTCTTGTCTCTAAATAACATGATTTTCTTGTTTCTTGATTTTTTTTTTAAAGTTTCAGAA  
TATTTTTATGTTTTATTATT

In100 candidate3900 (in intron):

LOCUS ENSG00000204084

DESCRIPTION Type II inositol-1,4,5-trisphosphate 5-phosphatase precursor (E  
3.1.3.36) (Phosphoinositide 5-phosphatase) (5PTase) (75 kDa inositol  
polyposphate-5-phosphatase). [Source:Uniprot/SWISSPROT;Acc:P32019]

GCCTGGCCTCACTGTTCTTAACATCTTTTTTCTTTTCTTTTTTTTTTCTTCCTAACCACTAGATGACCAGGGATGCTGTTA  
ACTTCCTTTTGCAGCTTTTT

In100 candidate3901 (in intron):

LOCUS ENSG00000112282

DESCRIPTION CRSP complex subunit 3 (Cofactor required for Sp1 transcriptionl  
activation subunit 3) (Transcriptional coactivator CRSP130) (Vitamin D3  
rceptorinteracting

protein complex 130 kDa component) (DRIP130) (Activator-ecruited  
cofactor 130 kDa component) (A [Source:Uniprot/SWISSPROT;Acc:Q9ULK]

AACCATTTCTGTACACTTTGGTAACAAACATTCCCCAAATGTTTTTTTCTTCTCCTGACTTTGATGTCTATTTCCAGCAG  
AATTTTTTTTTTTCTTTTTTT

In100 candidate3902 (in intron):

LOCUS ENSG00000183431

DESCRIPTION Splicing factor 3A subunit 3 (Spliceosome-associated protein 61  
(SAP 61) (SF3a60). [Source:Uniprot/SWISSPROT;Acc:Q12874]

GACATGTATGTAAGGAATGGTACTGACTCACTCCAAGTCCCATAGTAACTGACAATAGCCTCCCTTTTTTTTGAGTCAGTG  
GTTTTCAGTATTTTTTTTTCT

In100 candidate3903 (in intron):

LOCUS ENSG00000127603

DESCRIPTION Microtubule-actin cross-linking factor 1, isoforms 1/2/3/5 (Actn  
cross-linking family protein 7) (Macrophin-1) (Trabeculin-alpha) (620  
kDaactinbinding

protein) (ABP620). [Source:Uniprot/SWISSPROT;Acc:Q9UPN3]

GGGTAACCACTGTTCAAGCTTTGGTTTGTATCCTTACAGGTTTTTTCTTGCCAGGCTTGCTTTGGAAGTGCACCTTTACA  
TCCTTTATATTCCTTTAGGT

In100 candidate3904 (in intron):

LOCUS ENSG00000127603

DESCRIPTION Microtubule-actin cross-linking factor 1, isoforms 1/2/3/5 (Actn cross-linking family protein 7) (Macrophin-1) (Trabeculin-alpha) (620 kDaactinbinding

protein) (ABP620). [Source:Uniprot/SWISSPROT;Acc:Q9UPN3]

AGACATCTGTAACTCTTTTCTCTTCATCAACCCCATTTTCAATCTGTCATTGAGTTCTTTTGTTCCTTCAGAGTTTCTCT  
TAAATTTGTCTTTTCTCCC

In100 candidate3905 (in intron):

LOCUS ENSG00000127603

DESCRIPTION Microtubule-actin cross-linking factor 1, isoforms 1/2/3/5 (Actn cross-linking family protein 7) (Macrophin-1) (Trabeculin-alpha) (620 kDaactinbinding

protein) (ABP620). [Source:Uniprot/SWISSPROT;Acc:Q9UPN3]

AGTTCTCTTTACCTGGAATGCCCTTGTTCTTTATACTTAACTGAAATCTGTCTATTCCTTCAAGTTTCACTTCAGGTCTT  
TCTTCTGATGAAGACTTCTC

In100 candidate3906 (in intron):

LOCUS ENSG00000127603

DESCRIPTION Microtubule-actin cross-linking factor 1, isoforms 1/2/3/5 (Actn cross-linking family protein 7) (Macrophin-1) (Trabeculin-alpha) (620 kDaactinbinding

protein) (ABP620). [Source:Uniprot/SWISSPROT;Acc:Q9UPN3]

AGTCCCTTAACTACTATTTCTGTTTCACCTTATCTCAGTTTGTTCATCCACTTTCTACGTGGAATTCCTTTCTTCCTT  
GGCTTTACCTGTTCTGTAA

In100 candidate3907 (in intron):

LOCUS ENSG00000112319

DESCRIPTION Eyes absent homolog 4 (EC 3.1.3.48).

[Source:Uniprot/SWISSPROT;cc:O95677]

GTGCCAATGTGTGACTGTATGCTTGTATATGTTATACACAAAAGTTGTTAACTTCTGCAAACTTTGACCATTTTCAGTT  
TACATTGTTAATTTTCATTT

In100 candidate3908 (in intron):

LOCUS ENSG00000028839

DESCRIPTION TATA box-binding protein-like protein 1 (TBP-like protein 1) (TTA  
box-binding protein-related factor 2) (TBP-related factor 2) (STUD proten) (21  
kDa TBP-like protein). [Source:Uniprot/SWISSPROT;Acc:P62380]

TCATTGCTCCTGAAGTTTCTCTTTCATTATCTCGTTTCCTTTATAACATAGATCACATTCTCTTGATTATTTTGTCAGCC  
TATTTGTTGTCTTTTCTTC

In100 candidate3909 (in intron):

LOCUS ENSG00000118515

DESCRIPTION Serine/threonine-protein kinase Sgk1 (EC 2.7.11.1)

(Serum/glucocorticoid-regulated kinase 1). [Source:Uniprot/SWISSPROT;Acc:O00141]

GGAACAAAATTTAAGGGATAAGCAAAGTTTAACTGCATGCCAATTCATTTTTTTTGCAGTTATTTCTCTTTTTCCTCAAA  
GTTTATCATTATACATATAT

In100 candidate3910 (in intron):

LOCUS ENSG00000112339

DESCRIPTION HBS1-like protein (ERFS).

[Source:Uniprot/SWISSPROT;Acc:Q9Y450]EXON

TGTAATAAAAGGGAAAAAGGTCACATGATTTTCTTACCTTGAGATAACATAATTTATCTTTGCCTTATTTTTTCAGTT  
TTTGTCTATGCGTTTCTATT

In100 candidate3911 (in intron):

LOCUS ENSG00000135541

DESCRIPTION Jouberin (Abelson helper integration site 1 protein homolog) (AI-  
1). [Source:Uniprot/SWISSPROT;Acc:Q8N157]

TCTTACATTGTTTGGATTTTCTACATATGCAATCATGTAATACGTTAATAACGATAGTTTTATCGCTTCTTTTTCAGTC  
CTTATGCCTTATCATTTTGC

In100 candidate3912 (in intron):

LOCUS ENSG00000084073

DESCRIPTION CAAX prenyl protease 1 homolog (EC 3.4.24.84) (Prenyl proteinsecific  
endoprotease 1) (Farnesylated proteins-converting enzyme 1) (FACE-  
1)(Zinc metalloproteinase Ste24 homolog). [Source:Uniprot/SWISSPROT;Acc:07584]

AGCTTGGGCAACAAGAGTGAAACTCCATCTAAAATAAATAATAAATACTACTGTTAACATTTGTATATACTTTCAGTCTA  
CTTTTTATATTTGTATATTT

In100 candidate3913 (in intron):

LOCUS ENSG00000171408

DESCRIPTION cAMP-specific 3',5'-cyclic phosphodiesterase 7B (EC 3.1.4.17).  
Source:Uniprot/SWISSPROT;Acc:Q9NP56]

AATATTTTCAAAAACTAACTCCTGGAATCACTGATCTTTTGAATGGTTTTTCATTCCTTGACTACTTTCAGCTCAGCTC  
TGATTTTCGATTACTTGTCTT

In100 candidate3914 (in intron):

LOCUS ENSG00000197442

DESCRIPTION Mitogen-activated protein kinase kinase kinase 5 (EC  
2.7.11.25)(MAPK/ERK kinase kinase 5) (MEK kinase 5) (MEKK 5) (Apoptosis  
signalregulting

kinase 1) (ASK-1). [Source:Uniprot/SWISSPROT;Acc:Q99683]

GCAAGTTAAAGGTTTTCACTGATTTTTTCTTGATCTGTTTACTATTTAACTATATTTTAATTTCTTCTTTGACTACAGTT  
GTCATTTGCTTTTTCATTTT

In100 candidate3915 (in intron):

LOCUS ENSG00000135540

DESCRIPTION NHS-like 1. [Source:Uniprot/SPTREMBL;Acc:Q5SYE7]

TTAACACTGATATGTTGGTCCCAAGGAGTTTCTGGATTTTTTTTTTCTTTCTCCTTTCCTTCTTTTAACCAGAGTTTTTA  
GATTTCTATCAAGTTTCTTT

In100 candidate3916 (in intron):

LOCUS ENSG00000203735

DESCRIPTION OTTHUMP00000017300 (Fragment).

[Source:Uniprot/SPTREMBL;Acc:Q5JK3]

TTATAGGTTGGAAAGATTCACCACGTCTCATAACTTTCATATTCTTTTATACACATTTTCCATTTCTGTGACCTTCAGTA  
TTTCAGTCTGGATTTTCTTT

In100 candidate3917 (in intron):

LOCUS ENSG00000135597



DESCRIPTION RalBP1-associated Eps domain-containing protein 1 (RalBP1-interacting protein 1). [Source:Uniprot/SWISSPROT;Acc:Q96D71]

TCTTCTTGTTTCATCGTGGAGCTGAAATACTCTGTCTTTAACGTCCTGATTGTCTTCCTACTGTCTTCTTTGGAGTCAGCT  
TTGACTCCTCTTTTCCATCT

In100 candidate3918 (in intron):

LOCUS ENSG00000010803

DESCRIPTION Polycomb protein SCMH1 (Sex comb on midleg homolog 1).  
[Source:niprot/SWISSPROT;Acc:Q96GD3]

TTTCTCTTTTTATGAGTGAAGTTTAACATCTTTTCATATGTCTAGGGTGCCATTTTATCTTTTTTTTTTCTTTTACAGGT  
TGTCATTTCTTTTGCTCATT

In100 candidate3919 (in intron):

LOCUS ENSG00000127124

DESCRIPTION human immunodeficiency virus type I enhancer binding protein 3  
Source:RefSeq\_peptide;Acc:NP\_078779]

TCCTTTGTTTCCTTTCTTCCTTCTTAACTTCTTTTTTTACTTCTTTCTTATTTTCTGGCACTACAAGTTTCTCCAGGCTGG  
TCTTGTATTTTCTGAGCCCT

In100 candidate3920 (in intron):

LOCUS ENSG00000198815

DESCRIPTION Forkhead box protein J3. [Source:Uniprot/SWISSPROT;Acc:Q9UPW0]

EXON

AAACCTGTTCCCTTGACTTGTTTTTTAAAAAAGTAACTCCCTGGTACTGCCTAATTTAATTTTCTCTCACTCATCAGTG  
TCCTTGACTTTGCATTCCTT

In100 candidate3921 (in intron):

LOCUS ENSG00000198815

DESCRIPTION Forkhead box protein J3. [Source:Uniprot/SWISSPROT;Acc:Q9UPW0]

EXON

TTGCAATTTGGTGGTTTTCTGTAGTGGTAACATTTGAGTTTTTTCTCTTCTTCATTTGTATGTTTCGTTCTACCAGTGAGT  
TTTTATACTTCTCCGTGTTT

In100 candidate3922 (in intron):

LOCUS ENSG00000009844

DESCRIPTION Uncharacterized protein C6orf55 (Dopamine-responsive protein DR-  
1). [Source:Uniprot/SWISSPROT;Acc:Q9NP79]

AATGATAGTCATCCTTCATGCCCTGATTCTACTGTTTCCTATTATGTAACACACTACTACTTTACTTTTATTTGTCAGCC  
TTATTTTACCCAAATTTTTT

In100 candidate3923 (in intron):

LOCUS ENSG00000009844

DESCRIPTION Uncharacterized protein C6orf55 (Dopamine-responsive protein DR-  
1). [Source:Uniprot/SWISSPROT;Acc:Q9NP79]

CTAGAAACTTCCTATTTATTTTAACCTTTTTCTCTGTTTCCTTTTTCTTATTCCAGTATTTTCCCACTTTACCCTTTCT  
ACAAATTGCCTATTCGAATT

In100 candidate3924 (in intron):

LOCUS ENSG00000112414

DESCRIPTION Probable G-protein coupled receptor 126 precursor.

[Source:Unipot/SWISSPROT;Acc:Q86SQ4]

CCTAACTTTTCGAAATTATCCTTCACTGTATTTATATTTAAATCCTCCACTATCTTCAGCAATTTGTATTGTCCATATAT  
CCTCCTGTGTACCTTGTTTT

In100 candidate3925 (in intron):

LOCUS ENSG00000164010

DESCRIPTION Erythroid membrane-associated protein precursor (hERMAP) (Sciana  
blood group antigen) (Radin blood group antigen).

[Source:Uniprot/SWISSPRT;Acc:Q96PL5]

GAGTGAACTGAGTAAGTTTCCCATGTTCTTGTAACCTCCGTACCAACTTATCTCCTGTTGCCCTAATATTTGCAGTGATA  
GCTCATTCCCCTTGTTTCTT

In100 candidate3926 (in intron):

LOCUS ENSG00000112419

DESCRIPTION Phosphatase and actin regulator 2.

[Source:Uniprot/SWISSPROT;Ac:O75167]

TGTTATTAGTAATGATTATATTTGACTTATTAACCTGTATCTTCTGTTATTTTCCATGTATCCTCTACATCTACCAGTCT  
GTTCCACGTCTGTTCTGTAT

In100 candidate3927 (in intron):

LOCUS ENSG00000112419

DESCRIPTION Phosphatase and actin regulator 2.

[Source:Uniprot/SWISSPROT;Ac:O75167]

TGAAATGTACAATCAATAAAGCATGAATAGGCAAACATAAATAACCTGCTTTCTGCTTTCTCTCATGTAATTTTGCAGTA  
CTGTTCTCTTTTCATTTCTC

In100 candidate3928 (in intron):

LOCUS ENSG00000152818

DESCRIPTION Utrophin (Dystrophin-related protein 1) (DRP1) (DRP).

[Source:Uiprot/SWISSPROT;Acc:P46939]

TCCTCCGTGGAGAGAGGATTAGTTTCTGAATTCCTTTGCTTCCCTCTCTAACTTCAACATTACCTCCTGTAGTTTCAGCT  
AATTTGTTCTGTAATTCTCT

In100 candidate3929 (in intron):

LOCUS ENSG00000152818

DESCRIPTION Utrophin (Dystrophin-related protein 1) (DRP1) (DRP).

[Source:Uiprot/SWISSPROT;Acc:P46939]

CCTCTTTTCTTTTAGGTAACCATTCCTAGAAAACACTTTCCTCCATGATTTTTATCTCCAATGCCTTTTTTTCTTCCAGTT  
CCTTTAAATTTTTTCCATTA

In100 candidate3930 (in intron):

LOCUS ENSG00000146414

DESCRIPTION SNF2 histone linker PHD RING helicase isoform a

[Source:RefSeq\_epitide;Acc:NP\_001036148]

AGTTTTATGCATGTTTGACTCCTTAACATTGTCTAGTAGGTTTCTGATGTTCTATTTATTGTTTTTTCAGTCTTTGTTTA  
TCTCTACTTCATTTTTGACA

In100 candidate3931 (in intron):

LOCUS ENSG00000152822

DESCRIPTION Metabotropic glutamate receptor 1 precursor (mGluR1).

[Source:Uiprot/SWISSPROT;Acc:Q13255]

TTCTTTTATTTTCATGCTTAGTTTAAATATTTCTATGATAATTCATTAACGGATAACTCATTTAACCTCTTTTCCAGCT  
CATTTCTTTATCTTAACATG

In100 candidate3932 (in intron):

LOCUS ENSG00000152822

DESCRIPTION Metabotropic glutamate receptor 1 precursor (mGluR1).

[Source:Uiprot/SWISSPROT;Acc:Q13255]

AACTGCTTATGGGGCATATTTGAAAGGGAAGACAAAGTGAAAGGTAACTCTATTGTCCATTATTCTACCATTTCAGCTC  
TGTTTTTTTCTTTCTTGAAA

In100 candidate3933 (in intron):

LOCUS ENSG00000152822

DESCRIPTION Metabotropic glutamate receptor 1 precursor (mGluR1).

[Source:Uiprot/SWISSPROT;Acc:Q13255]

AGCTCCTACTAACGCTGCTTGAAACTCTATGCATTCTTTTCATTTTATTTTGCATAATTATCATCACAGTGTGCATACAA  
TTCTCTATCTTATTTCACTC

In100 candidate3934 (in intron):

LOCUS ENSG00000118492

DESCRIPTION Uncharacterized protein C6orf103.

[Source:Uniprot/SWISSPROT;AccQ8N7X0]

GGCCTGTGAGGTCCTACTAAGAAATTTGCTGAGAAATTATAACTCCTTATTTGCTTCATTTCTCTTGCTGCTTTCAGAA  
TCCTCTCTTTGTCTTTGATT

In100 candidate3935 (in intron):

LOCUS ENSG00000203727

DESCRIPTION SAM domain containing 1 (LOC389432), mRNA

[Source:RefSeq\_dna;Ac:NM\_001030060]

TTACCTAACCCGTGTTTATTTAATGAAGCTCCTTCACATTTTAAACATTTTGGATTTCTTTCCCATTCTCTCTTCAGGAG  
TTCCTAATCTCTTTATCCAT

In100 candidate3936 (in intron):

LOCUS ENSG00000111962

DESCRIPTION Uronyl 2-sulfotransferase (EC 2.8.2.-).

[Source:Uniprot/SWISSPRT;Acc:Q9Y2C2]

TAGCCTTATTATCTACACCTCCTTCCATGAAACTCTGCTTCTGATTTCTTAACCTCTTCTGGGGGTTTATACCCTTCAGCT  
TTTTCCACGAGCTGCTATTT

In100 candidate3937 (in intron):

LOCUS ENSG00000111962

DESCRIPTION Uronyl 2-sulfotransferase (EC 2.8.2.-).

[Source:Uniprot/SWISSPRT;Acc:Q9Y2C2]

CATCTCTATTCTTGTCCTTATGCTGATAACCTAAGTTGAAAGGCCTTTTTTGTCTTTTCTTCTTTTTTTGAGACAGGAT

CTTCCTCTGTTGCCTAGGTT

In100 candidate3938 (in intron):

LOCUS ENSG00000055208

DESCRIPTION Mitogen-activated protein kinase kinase kinase 7-interacting  
prtein 2 (TAK1-binding protein 2). [Source:Uniprot/SWISSPROT;Acc:Q9NYJ8]

ATCTCATATCAAACCTGCCTGTGGACATTTTAACTTGGTTATTCATCTTTCTTAAGTCTAAAACTCTCCTTTCTGTCAGGT  
TCTTAATCTTCCAGGCTTAT

In100 candidate3939 (in intron):

LOCUS ENSG00000055208

DESCRIPTION Mitogen-activated protein kinase kinase kinase 7-interacting  
prtein 2 (TAK1-binding protein 2). [Source:Uniprot/SWISSPROT;Acc:Q9NYJ8]

TATCTGTGATTAACTACAACCATTTTTGTTTAGTTTCAGCAGTTTATAAATGTTATATGCTATTATTTTTTCCACTTACA  
ACTTAATTCTCCTCTTCTCC

In100 candidate3940 (in intron):

LOCUS ENSG00000055208

DESCRIPTION Mitogen-activated protein kinase kinase kinase 7-interacting  
prtein 2 (TAK1-binding protein 2). [Source:Uniprot/SWISSPROT;Acc:Q9NYJ8]

AACTGTTGTGATCTCTGCTTGAACATGAGAGTAGGCCATCTAACATAAGTGTAATATCTCTATCTAGTTTTCTTCAGATG  
TTCTTAACTCTTGTTTTTCT

In100 candidate3941 (in intron):

LOCUS ENSG00000131013

DESCRIPTION Peptidyl-prolyl cis-trans isomerase-like 4 (EC 5.2.1.8) (PPIase (Rotamase) (Cyclophilin-like protein PPIL4)).

[Source:Uniprot/SWISSPROT;AccQ8WUA2]

AACTACTCTTAACTTGAAACATACTCCTAACTACTTTTGCTCGTCTTCTTACCTGGGGTATATTCTCATCAGTTTTCTTT  
CCTAAACTCTAATGTTATTT

In100 candidate3942 (in intron):

LOCUS ENSG00000120265

DESCRIPTION Protein-L-isoaspartate(D-aspartate) O-methyltransferase (EC 2.11.77) (Protein-beta-aspartate methyltransferase) (PIMT) (Protein Lisoaspartyl/D-aspartyl methyltransferase) (L-isoaspartyl protein carboxyl methyltransferase). [Source:Uniprot/SWISSPROT;Acc:P22061]

AACTTACGAGTAACATACCTGGTGTCTGATTGGTTGTCATACTTTTCATTTTCCCTCCTTTCAGATCCAATCCATTCTA  
CACATTATACTGATTTTTTTC

In100 candidate3943 (in intron):

LOCUS ENSG00000009765

DESCRIPTION Iodotyrosine dehalogenase 1 precursor (EC 1.-.-.-) (IYD-1).

[Source:Uniprot/SWISSPROT;Acc:Q6PHW0]

TTAATTTTTCTGTAGCTAGTGTAACCTGCTAGTCAACCATCCTTTTAAGTTCTTAATTCTATTATTTTTCAATTCCAGAA  
GTTCTCTATTTTTTTCAGATT

In100 candidate3944 (in intron):

LOCUS ENSG00000120278



DESCRIPTION Pleckstrin homology domain-containing family G member 1.

[Source:Uniprot/SWISSPROT;Acc:Q9ULL1]

AGCAAACGTGTCCCCATCTTAATTAACACTGGTCCCTGGGTCCTCATTCTTCCTGTATTTTCAGGGATGCTTTGGCTTAC  
TCTTCCTTTTTTCAGTATTTT

In100 candidate3945 (in intron):

LOCUS ENSG00000120254

DESCRIPTION methylenetetrahydrofolate dehydrogenase (NADP+ dependent) 1-lik

[Source:RefSeq\_peptide;Acc:NP\_056255]

TAGTAACTGACACTTTATTTATTTATTTATTTATTTATTTATTTTCTTTTTTTTTTTTTTTTTTTTGAGACAGAGTCT  
TGCTCTGGTCTTGAACCTCTT

In100 candidate3946 (in intron):

LOCUS ENSG00000120254

DESCRIPTION methylenetetrahydrofolate dehydrogenase (NADP+ dependent) 1-lik

[Source:RefSeq\_peptide;Acc:NP\_056255]

GCTACAAATACTGCGCTGGGATCGACTTCCTTTTGATCATTACACAAATAACCATGGCTGCCTCTTATGTTTATTCAGCT  
TGTTTTTTTTTCCATAATTG

In100 candidate3947 (in intron):

LOCUS ENSG00000120262

DESCRIPTION Coiled coil-containing protein C6orf97.

[Source:Uniprot/SWISSPRT;Acc:Q8IYT3]

AGTTCCAAGACTTAACCTTGGTTCTTTTTCTTATATTTATTTCTTTGCTGACTTTCTTATTCAGATCATGATTTTTTCTT  
ATTCATTGAATTATCTCTT

In100 candidate3948 (in intron):

LOCUS ENSG00000091831

DESCRIPTION Estrogen receptor (ER) (Estradiol receptor) (ER-alpha).

[SourceUniprot/SWISSPROT;Acc:P03372]

CTGAAGTTCTTGAAAATAATCTCTTCTAACCTGGGTAAATATTCCTCCTTTTCAGAAATGTTTGCAATGTTGCTTTTTTT  
TAAATTAATCTCTTTTTCTT

In100 candidate3949 (in intron):

LOCUS ENSG00000091831

DESCRIPTION Estrogen receptor (ER) (Estradiol receptor) (ER-alpha).

[SourceUniprot/SWISSPROT;Acc:P03372]

TTAGTTCTACTAGTTTTCTGCTTCTAACTCATTAAGTTATGCCTTTAGCTTTATTAAATCCTTCATTCTGCTATCAGTT  
AATGTTTTAGTTCATTTTCT

In100 candidate3950 (in intron):

LOCUS ENSG00000131018

DESCRIPTION Nesprin-1 (Nuclear envelope spectrin repeat protein 1) (Synaptic nuclear envelope protein 1) (Syne-1) (Myocyte nuclear envelope protein 1) Myne-1) (Enaptin). [Source:Uniprot/SWISSPROT;Acc:Q8NF91]

TAACTGTTTTCTTAAACTGTAGCCTTCTTTTCAATTTTTTTCTTCTTAATAGAACCTTCTGACTCCTGTTTTTCAGGGC  
CACTTGCTCTTCCATTTTTT

In100 candidate3951 (in intron):

LOCUS ENSG00000131018

DESCRIPTION Nesprin-1 (Nuclear envelope spectrin repeat protein 1) (Synaptic nuclear envelope protein 1) (Syne-1) (Myocyte nuclear envelope protein 1) Myne-1) (Enaptin). [Source:Uniprot/SWISSPROT;Acc:Q8NF91]

CTTTAACCTGTTGATGATTTTCTCTTATACATTCTCTGCTCTTTGTATATTTTATGGTGTTTCAGTTTTCTAAAGATGCC  
TCTTGATTTATTTTGCCTTT

In100 candidate3952 (in intron):

LOCUS ENSG00000159592

DESCRIPTION GC-rich promoter binding protein 1-like 1  
[Source:RefSeq\_peptid;Acc:NP\_067652]

CCATAATTCCACCATTTCTAATAAAACCATTATTAACATTTTGGGATTTTTCCTTTTAGTCTTTTACTTCCAGAACAGAAA  
TCTCTTTTATCTGTCTTCTT

In100 candidate3953 (in intron):

LOCUS ENSG00000197429

DESCRIPTION Actin-binding protein IPP (MIPP protein) (Kelch-like protein 27).  
[Source:Uniprot/SWISSPROT;Acc:Q9Y573]

AGGTGATCCTTTCTACCTTAACTGATGGTCTTGTAAGACTTTCCTTTTAATGATTTTGTTTCCTCAACTTTTCTCAGTT  
CTGCTTTTCATTCTTGATTC

In100 candidate3954 (in intron):

LOCUS ENSG00000086015

DESCRIPTION Microtubule-associated serine/threonine-protein kinase 2 (EC 2..11.1). [Source:Uniprot/SWISSPROT;Acc:Q6P0Q8]

AGTCCTTAACGCTGCTTACCAATTCTACTTTTTGTTTCAGCGTATTTTCTTGTTCTCTGTATTATCTCTCAATTTTTTTTTT  
TTTTTTACTCATCTCAAATT

In100 candidate3955 (in intron):

LOCUS ENSG00000086015

DESCRIPTION Microtubule-associated serine/threonine-protein kinase 2 (EC 2..11.1). [Source:Uniprot/SWISSPROT;Acc:Q6P0Q8]

TTTTTATTGATCATGCTTTTGGTATCTAAGAACTTACTTGCCTAACCCAAGCTGTTTTTTTTTTCCATTTTCTTCCAGAA  
GTTTACATTTTCTACTCCT

In100 candidate3956 (in intron):

LOCUS ENSG00000086015

DESCRIPTION Microtubule-associated serine/threonine-protein kinase 2 (EC 2..11.1). [Source:Uniprot/SWISSPROT;Acc:Q6P0Q8]

GGTGATAACCCCTTTATCATTTTTTATTGTGTCTATTTGATTCTTCTCTCTTTTCTTCTTTATTAGTCTTGCTAGCAGTC  
TATCAATTTTGTTGATCTTT

In100 candidate3957 (in intron):

LOCUS ENSG00000159658

DESCRIPTION Uncharacterized calcium-binding protein KIAA0494.  
[Source:Uniprt/SWISSPROT;Acc:O75071]

ACCGTAGAGTTTGTGAAGGTAACGTGTCCTCTACAAATTCTCATTTGTTTTTCATTGTTTGTTACTCTTTTTTGTTCAGAT

TTCTCTGTTGACTTCTGCAG

In100 candidate3958 (in intron):

LOCUS ENSG00000091844

DESCRIPTION Regulator of G-protein signaling 17 (RGS17).

[Source:Uniprot/SWSSPROT;Acc:Q9UGC6]

TTCTCTCTTTTTTCTTAGTCTAGCTAAAGGTTTTCCTATTTTGTTTAACTTTTCAAGAAACCAAATTTTGTTCAGTG

ATCTTTTTTTTATTGTTTTCC

In100 candidate3959 (in intron):

LOCUS ENSG00000154198

DESCRIPTION CDNA FLJ40054 fis, clone TBAES2000315, weakly similar to

CYTOCHROME P450 4A1 (EC 1.14.15.3). [Source:Uniprot/SPTREMBL;Acc:Q8N1L4]

TAATCTTCTCAAAGAAATAACTTTTTGTTTGTTAATTTTTTTCTATTGTTTTTCCTGTTTTTATTTTATTTACCTCAGCT

CTAATCTTTATCATTTTCCTT

In100 candidate3960 (in intron):

LOCUS ENSG00000154198

DESCRIPTION CDNA FLJ40054 fis, clone TBAES2000315, weakly similar to

CYTOCHROME P450 4A1 (EC 1.14.15.3). [Source:Uniprot/SPTREMBL;Acc:Q8N1L4]

TTGTGGTTAGGTTGTATTCTGTAGTGGTAACATTTGAGCTTTTTCTCTGTCTTGTTTGTGTGTTAGTTTTACCAGTGATC  
TTTATATTTTCTAGTATTTT

In100 candidate3961 (in intron):

LOCUS ENSG00000186160

DESCRIPTION Cytochrome P450 4Z1 (EC 1.14.14.1) (CYP1VZ1).

[Source:Uniprot/SISSPROT;Acc:Q86W10]

TAATCTTCTCAAAGAAATAACTTTTTGTTTGTTAATTTTTTTCTATTGTTTTTCCTGCTTTTATTTTATTTACCTCAGCT  
CTAATCTTTATCATTTTCCTT

In100 candidate3962 (in intron):

LOCUS ENSG00000146426

DESCRIPTION Putative RNA-binding protein 16 (RNA-binding motif protein

16).[Source:Uniprot/SWISSPROT;Acc:Q9UPN6]

AGTGTTAAACACTTTAGCTCTTATCCTCATCGCTTCTCCTTTGGTTTGTGTCAGTCAGTTTTTAATTGGCTCCTAATTTAC  
TATGCTCTTTTTCTCTAGTT

In100 candidate3963 (in intron):

LOCUS ENSG00000146426

DESCRIPTION Putative RNA-binding protein 16 (RNA-binding motif protein

16).[Source:Uniprot/SWISSPROT;Acc:Q9UPN6]

AGAATCACCTGGAGGGCTTGCTAACGCATAAATCTCTGGGTCCTGTCCTCTGTTTCTGACTCAGAAGATCTTTTTTTTTT  
TTTTTTTTTTTTTTTTTTGA

In100 candidate3964 (in intron):

LOCUS ENSG00000049618

DESCRIPTION AT-rich interactive domain-containing protein 1B (ARID domainontaining

protein 1B) (Osa homolog 2) (hOsa2) (p250R) (BRG1-binding proteinhELD/OSA1) (BRG1-associated factor 250b) (BAF250B).

[Source:Uniprot/SWISSPRT;Acc:Q8NFD5]

AGGCATGAGCCACCATGTCCTGCTATAAATAACTTTTAATAGGCTCTTTTCTGGCTTTTCTTTTAGTAACTCAGCCCA  
TTTTCTTCTTCTCAATCTGG

In100 candidate3965 (in intron):

LOCUS ENSG00000049618

DESCRIPTION AT-rich interactive domain-containing protein 1B (ARID domainontaining

protein 1B) (Osa homolog 2) (hOsa2) (p250R) (BRG1-binding proteinhELD/OSA1) (BRG1-associated factor 250b) (BAF250B).

[Source:Uniprot/SWISSPRT;Acc:Q8NFD5]

AGATCATTAATTGGTTAACTAGACAATAATCATTAGTTTACCCATCTTATTTTATGCCTTTGATTTTCCTTTCCAGTAA  
CATAATCTTTTTTTGTTTCT

In100 candidate3966 (in intron):

LOCUS ENSG00000132122

DESCRIPTION Spermatogenesis-associated protein 6 precursor.

[Source:UniprotSWISSPROT;Acc:Q9NWH7]

TGAAAACCTTGATAGTATAGCTTAGAATCATTACCTGATTTTAGTAACAAAAATAAACTTATTTTTTGCCTACAGATTTC  
ATTCTGATTGGTGTTACCT

In100 candidate3967 (in intron):

LOCUS ENSG00000186094

DESCRIPTION ATP/GTP binding protein-like 4.

[Source:Uniprot/SPTREMBL;Acc:Q5U57]

TCTTAACCACTAAATACTTTGGATCCTTCTACTTCTCAGCATCTCCACTGCTTTTCTTCTCTTCTAGATTATCAACATCA  
GACTCCTGGACTTTTATTAT

In100 candidate3968 (in intron):

LOCUS ENSG00000186094

DESCRIPTION ATP/GTP binding protein-like 4.

[Source:Uniprot/SPTREMBL;Acc:Q5U57]

AGTAGGGGTTATTAACAAAGACCACCTCTTTTTTTTTCTGAGCAGTTCATTTATCATCCTTACCCTACTTAAATCATTTCT  
TTGTTGTTGTTGTTGTTGTT

In100 candidate3969 (in intron):

LOCUS ENSG00000186094

DESCRIPTION ATP/GTP binding protein-like 4.

[Source:Uniprot/SPTREMBL;Acc:Q5U57]

CGTCAAATTTACTATTTTTCTGTTTTCTAACTTTTTTTATTTACATTTTACTACTTCTTTCCTACTGCTTTCCACAGGT  
TTCTTTTTGGTTCTTTTTCA

In100 candidate3970 (in intron):

LOCUS ENSG00000162373

DESCRIPTION Coiled-coil domain-containg protein Clorf165.

[Source:Uniprot/SSISSPROT;Acc:Q7L4P6]

AGTAGGGGTTATTAACAAAGACCACCTCTTTTTTTTTCTGAGCAGTTCATTTATCATCCTTACCCTACTTAAATCATTTCT



TTGTTGTTGTTGTTGTTGTT

In100 candidate3971 (in intron):

LOCUS ENSG00000122339

DESCRIPTION CDNA FLJ10029 fis, clone HEMBA1000817 (Chromosome 6 open reading  
frame 35). [Source:Uniprot/SPTREMBL;Acc:Q9NWH2]

CTAATGTGCTATATATTTTTCCACTATGTAAATTGTGCTGAACATAACTTATCATGTAACTTTTCTTGGTGACTCAGAT  
CTATCATTTATTGTTTGCTT

In100 candidate3972 (in intron):

LOCUS ENSG00000162374

DESCRIPTION ELAV-like protein 4 (Paraneoplastic encephalomyelitis antigen HD)  
(Hu-antigen D). [Source:Uniprot/SWISSPROT;Acc:P26378]

GCTGGATTTGCCTTAGGGTAACAAGACTATGGGTCCTTAAAAACCCGCTTCATCTTATTTTCCTTTGTGCAGCTTCATAC  
AGTAGTGGTTTTCTCTTCTC

In100 candidate3973 (in intron):

LOCUS ENSG00000162374

DESCRIPTION ELAV-like protein 4 (Paraneoplastic encephalomyelitis antigen HD)  
(Hu-antigen D). [Source:Uniprot/SWISSPROT;Acc:P26378]

CTTAATTGATATGGTCCCATCTTTGCTGTCTGTATATTGTAACCTGCAAATTATTTGACTTTTTCCCAGAAACCAACTTA  
CTTCAGATCTATTTTTTTTTC

In100 candidate3974 (in intron):

LOCUS ENSG00000130340

DESCRIPTION Sorting nexin-9 (SH3 and PX domain-containing protein 1) (Proten  
SDP1) (SH3 and PX domain-containing protein 3A).

[Source:Uniprot/SWISSPRO;Acc:Q9Y5X1]

AGAGAGGTAGATACTTAAGAATGGGGCCTTAGCTTTTGCATTCTAACTCCCATATGAACTTTTTTTATTGCCAGGGTTTT  
GTGAATTTTTTTTCCTTCCT

In100 candidate3975 (in intron):

LOCUS ENSG00000185104

DESCRIPTION FAS-associated factor 1 (Protein FAF1) (hFAF1).

[Source:UniprotSWISSPROT;Acc:Q9UNN5]

GTAACACACAAATGTGCTTTTGTTTTTTCACCCCTAGTCTTTTCAGCTAGTAATACTTTTGTGCTGCCTAAATTGCTTGATG  
AATTTTCTTTTCTTTCTTTT

In100 candidate3976 (in intron):

LOCUS ENSG00000185104

DESCRIPTION FAS-associated factor 1 (Protein FAF1) (hFAF1).

[Source:UniprotSWISSPROT;Acc:Q9UNN5]

TTGCATTAATTGAGTTGTAACCTCGGATATGTCTGTATTTTATATTTTCTGCACATATCACTTGGACCTCTTCTCCAGTG  
TTTTTGTGCACATTTTGTGCT

In100 candidate3977 (in intron):

LOCUS ENSG00000185104

DESCRIPTION FAS-associated factor 1 (Protein FAF1) (hFAF1).

[Source:UniprotSWISSPROT;Acc:Q9UNN5]

AGTTTTATTATTCTTTCAAGGAATACTCTTGACCTATTGATCTTTTATATGCTGTTTTTCATGTCTCAGTTTCCTTC  
ATTTCAGCTTTGATTTTGGT

In100 candidate3978 (in intron):

LOCUS ENSG00000185104

DESCRIPTION FAS-associated factor 1 (Protein FAF1) (hFAF1).

[Source:UniprotSWISSPROT;Acc:Q9UNN5]

AAAGGAAATTGTTGGCTTTGTTGTTTGCTACAAGTGTGTAACCTTTTTCCCCTAAGCTTTGTCTTAGTCTGTTTTTCAGCAG  
TGCATTCCTTTTCCTTTTCCT

In100 candidate3979 (in intron):

LOCUS ENSG00000130338

DESCRIPTION Tubby-related protein 4 (Tubby-like protein 4) (Tubby superfamily  
protein). [Source:Uniprot/SWISSPROT;Acc:Q9NRJ4]

AATTCATTTAAAAAATACAAATAGATTTTCATGCAAAGGTCATGATTATAACTTCAAAGAGCCTTTATTTTATGCAGCT  
TTTATTTTGTTATAATGTCT

In100 candidate3980 (in intron):

LOCUS ENSG00000130338

DESCRIPTION Tubby-related protein 4 (Tubby-like protein 4) (Tubby superfamiy protein). [Source:Uniprot/SWISSPROT;Acc:Q9NRJ4]

AGGCACTTCATATATGTGTACCTTTACGTAAAAATAATCATAACGCTTATTGAATCTTTCTGTGTGCCAGACAGT  
TTTTGTTTTATTTCTCACAA

In100 candidate3981 (in intron):

LOCUS ENSG00000146433

DESCRIPTION Transmembrane protein 181. [Source:Uniprot/SWISSPROT;Acc:Q9P2C4]

AATAGTTTGGGTCCCTTTCCCCTTTTCATAACATGATCATAGCACCTTTCATTTCCCTTTCTATCACAGCTGTAATTATT  
TATTTATTTATTTATTTATT

In100 candidate3982 (in intron):

LOCUS ENSG00000164674

DESCRIPTION synaptotagmin-like 3 [Source:RefSeq\_peptide;Acc:NP\_001009991]

GATGCATGTAACCTAGAACACCTCCACTTGCAATCTTGTGTCTTTCAATGTTCTTTCTGCTCAGATACTTTTTTCTCTG  
TTTATCTTAAAATTCAAGTC

In100 candidate3983 (in exon):

LOCUS ENSG00000085832

DESCRIPTION Epidermal growth factor receptor substrate 15 (Protein Eps15) (F-1p protein). [Source:Uniprot/SWISSPROT;Acc:P42566]

CACCCCTTTATCTTCTCCTAGATTTACTTGTTAACCATTTTGTACATTTGCTTTCTCCCTGTATCCATATTCTTCAGAA  
TTTTTTCCTAGTTTAAACT

In100 candidate3984 (in intron):

LOCUS ENSG00000085832

DESCRIPTION Epidermal growth factor receptor substrate 15 (Protein Eps15) (F-

1p protein). [Source:Uniprot/SWISSPROT;Acc:P42566]

TGTAACATAAATTAATCCTGCCCATCAACTTTATTATCCCTATTTTGTAATTCAGAAAGTTAAGGTTTCGTTTTATATTT  
CTTTTCTGTTAGTTTCTTTT

In100 candidate3985 (in intron):

LOCUS ENSG00000117859

DESCRIPTION Oxysterol-binding protein-related protein 9 (OSBP-related protein  
9) (ORP-9). [Source:Uniprot/SWISSPROT;Acc:Q96SU4]

GCCTTAGCTTAACACTCTCTATTCACTTGAGCTTTTCTTCTGTTCCCTTTGAAGTTCTTCAAACCTGTTCTTGCCTCAGGG  
CCTCTGAATGTTTTCTGTCT

In100 candidate3986 (in intron):

LOCUS ENSG00000164694

DESCRIPTION fibronectin type III domain containing 1  
[Source:RefSeq\_peptideAcc:NP\_115921]

GGAGCCTCACACACATGAAAATTGGACAATTAACCTTGCTCTGGTCATCTTCCTTTATTCCATCAGTTTATTCAAGTTTCT  
CCTTCATTTTGTGATAACCT

In100 candidate3987 (in intron):

LOCUS ENSG00000146457

DESCRIPTION Wilms' tumor 1-associating protein (WT1-associated protein)  
(Putative pre-mRNA-splicing regulator female-lethal(2D) homolog).

[Source:Uniprot/SWISSPROT;Acc:Q15007]

TAGGTGTGAGCCATCGCACCTGGCCCATTCATTTTCTCTACCTTCTTAACACATTTTGTCTTTTGTCTTCTATCAGTT  
TTGTTGTAATTCTTACCACC

In100 candidate3988 (in intron):

LOCUS ENSG00000157077

DESCRIPTION Zinc finger FYVE domain-containing protein 9 (Mothers against  
decapentaplegic homolog-interacting protein) (Madh-interacting protein)  
(Smadanchor for receptor activation) (Receptor activation anchor) (hSARA)  
(Novelserine protease) (NSP). [Source:Uniprot/SWISSPROT;Acc:O95405]

ACATTTTGTAGAAGGTGGCTTATTAATTAACCTCTCCTGAACTTTGTCTTAGGCTTTTAACTGGTCTCCTTGCCTTCAGTC  
TTTCTTTCCTTCATTTTGTC

In100 candidate3989 (in intron):

LOCUS ENSG00000134748

DESCRIPTION PRP38 pre-mRNA processing factor 38 (yeast) domain containing  
Aisoform 2 [Source:RefSeq\_peptide;Acc:NP\_116253]

AGGCCTAGCACATAGATGTCCTGATATGAAGTCTTAACACTTCTTTTACTTTTTGGCATCTAAATCTTTTATTTCCAGGT  
TGTTTGCTCTAATGACTTTT

In100 candidate3990 (in intron):

LOCUS ENSG00000162378

DESCRIPTION zyg-11 homolog B [Source:RefSeq\_peptide;Acc:NP\_078922]

TGTCCCAAAAAAATTAAAAAAAGGAATTAGTAATAGTAGTGATACCTAACTATACCTACATGTTTATGTTTCTTCAGTT

TTTTTTCCTGAATTGTGTAT

In100 candidate3991 (in intron):

LOCUS ENSG00000162378

DESCRIPTION zyg-11 homolog B [Source:RefSeq\_peptide;Acc:NP\_078922]

ACATGCACTATTCCTGGCCCTCTGTGAGCACTATGCACTTTTCTCTAACTCTTTAGATGGTTATTTTCCTGCCCTCAGCT  
TCCTTGTGTTTCATTTTATTA

In100 candidate3992 (in intron):

LOCUS ENSG00000203995

DESCRIPTION Zyg-11 homolog A. [Source:Uniprot/SPTREMBL;Acc:Q6WRX3]

ACCATATCTTTCCATCCAAAACATCTCTGTTAACATTTTGTTGCATATGACTTACTTCGGTCCTCTTTCTCATCAGCT  
TTTTTTTTTTTAAAACTATTT

In100 candidate3993 (in intron):

LOCUS ENSG00000116171

DESCRIPTION Nonspecific lipid-transfer protein (EC 2.3.1.176) (Propanoyl-Co  
C- acyltransferase) (NSL-TP) (Sterol carrier protein 2) (SCP-2) (Sterol carrier  
protein X) (SCP-X) (SCP-chi) (SCPX). [Source:Uniprot/SWISSPROT;Acc:P2207]  
AGAATTCCCTTCCCAACTACAAAAGGGAGCCATGATGGATCTGCTTAACTGGTTCTTGTTTGTGTTGTTGCCAGTAATAA  
ACCTCTTGTTTTTTTTTTCT

In100 candidate3994 (in intron):

LOCUS ENSG00000116171

DESCRIPTION Nonspecific lipid-transfer protein (EC 2.3.1.176) (Propanoyl-Co C- acyltransferase) (NSL-TP) (Sterol carrier protein 2) (SCP-2) (Sterol carrier protein X) (SCP-X) (SCP-chi) (SCPX). [Source:Uniprot/SWISSPROT;Acc:P2207]

TTGCTAGCTAGAGATAACTAGGAGAAAGCCCTGAATTTCTGTTTCTATTTCTTTTCTTTTTTATTTTTGAAACCAGGAT  
TTCGCTCTGTTGCTCTGGCT

In100 candidate3995 (in intron):

LOCUS ENSG00000157184

DESCRIPTION Carnitine O-palmitoyltransferase 2, mitochondrial precursor (EC2.3.1.21) (Carnitine palmitoyltransferase II) (CPT II).

[Source:Uniprot/SWISPROT;Acc:P23786]

GCCACAAAATTACTCCCTAACGCGGTTATACTAATTTTATTCTCACTCTTTTCTCATATCATTTTTTAAATTCGGCAGAT  
TTTTTTCTGTTTTTATTCTA

In100 candidate3996 (in intron):

LOCUS ENSG00000122194

DESCRIPTION Plasminogen precursor (EC 3.4.21.7) [Contains: Plasmin heavy chain A; Activation peptide; Angiostatin; Plasmin heavy chain A, short form; Pasmin light chain B]. [Source:Uniprot/SWISSPROT;Acc:P00747]

TGCTAACATCCCCCTTGTCAATTTCTAATTGTGTTTATTTTGGTCTTATCTTCCTTTTCTTCATTAGCCTAGCTAGCAGCC  
TACCTATCTTATTACTGTTT

In100 candidate3997 (in intron):

LOCUS ENSG00000058804



DESCRIPTION Nucleoporin NDC1 (hNDC1) (Transmembrane protein 48).

[Source:Unprot/SWISSPROT;Acc:Q9BTX1]

ACATAGATGAGTAAGTGATACCTAAAAAGTCTAATTTTAACTCTGTTTCCATTCTTTTAGATGTTTGCTATTTTCCAGAT  
ATTTTGTTTAGATTTTGCCT

In100 candidate3998 (in intron):

LOCUS ENSG00000085511

DESCRIPTION Mitogen-activated protein kinase kinase kinase 4 (EC

2.7.11.25)(MAPK/ERK kinase kinase 4) (MEK kinase 4) (MEKK 4) (MAP three kinase  
1). [Surce:Uniprot/SWISSPROT;Acc:Q9Y6R4]

AGTCCTGTAATTAGAACTTGCCAAATAAAACATTCTATATAGCTAACTCCTGTACTTTTTATTTCATTTTCCTTTTCAGAA  
TTCTGCTCTGTTTCCATTG

In100 candidate3999 (in intron):

LOCUS ENSG00000185345

DESCRIPTION Parkin (EC 6.3.2.-) (Ubiquitin E3 ligase PRKN) (Parkinson juvenile  
disease protein 2) (Parkinson disease protein 2).

[Source:Uniprot/SWISSPOT;Acc:O60260]

CATTAGAAAGCATCCTTTATATGTATTAGAAATTTAACTTAGAATTTAATTAACCTTTTCTATATTCACCTCTACAGCTACT  
TTTCTTAAAAGCTATCTTTC

In100 candidate4000 (in intron):

LOCUS ENSG00000185345

DESCRIPTION Parkin (EC 6.3.2.-) (Ubiquitin E3 ligase PRKN) (Parkinson juvenile disease protein 2) (Parkinson disease protein 2).

[Source:Uniprot/SWISSPOT;Acc:O60260]

GAGTCTTCTAACCTGTAACATAACATACTTCATTTACTTGAGGCTACTTTATTTCTCTCAGTGGTGTTTTGTTTTGGGT  
TTTCAATGTCTCTTCTGTTT

In100 candidate4001 (in intron):

LOCUS ENSG00000185345

DESCRIPTION Parkin (EC 6.3.2.-) (Ubiquitin E3 ligase PRKN) (Parkinson juvenile disease protein 2) (Parkinson disease protein 2).

[Source:Uniprot/SWISSPOT;Acc:O60260]

ATATACATACCTATATTTACTGTATTCATATAACTGATAAGTTTATATTTGTTTATAACATCTCTTTTCTACAGTTCC  
TCTTCTATTACCTTTTCCTT

In100 candidate4002 (in intron):

LOCUS ENSG00000185345

DESCRIPTION Parkin (EC 6.3.2.-) (Ubiquitin E3 ligase PRKN) (Parkinson juvenile disease protein 2) (Parkinson disease protein 2).

[Source:Uniprot/SWISSPOT;Acc:O60260]

AGCCACTCTTGATAACTGAGCATTCCTCTTTTCCTGCTCTGTGCTTTCACAGCTCCATTCTTTTCTCTTGACCTCAGGTGT  
TGTCTGCATCTTTATGCACT

In100 candidate4003 (in intron):

LOCUS ENSG00000185345

DESCRIPTION Parkin (EC 6.3.2.-) (Ubiquitin E3 ligase PRKN) (Parkinson juvenile

disease protein 2) (Parkinson disease protein 2).

[Source:Uniprot/SWISSPOT;Acc:O60260]

AGAATGAATGCTTAATGTGACCAAGCCCGTATGTTAAGTAGATAACTCACGGTGATCTCTCTCTTTTCATTTACAGGTCTT  
TTCTCTCTCTTATAATTAAC

In100 candidate4004 (in intron):

LOCUS ENSG00000112530

DESCRIPTION Parkin coregulated gene protein (PARK2 coregulated) (Molecular  
haperone/chaperonin-binding protein). [Source:Uniprot/SWISSPROT;Acc:Q96M98]EXON  
TAGGAAGGACCTCAATGTATAACTATTGATATGACTGTCATCCTTAGTTTCAGTTCTGAGATTTCCATTCCTAACTTATCA  
TTGCATCTACATTCTATTTTC

In100 candidate4005 (in intron):

LOCUS ENSG00000112530

DESCRIPTION Parkin coregulated gene protein (PARK2 coregulated) (Molecular  
haperone/chaperonin-binding protein). [Source:Uniprot/SWISSPROT;Acc:Q96M98]EXON  
CTATAACATCATATTTGCTGATTTTCATTCTGAATCTTTCCAGGTCATGGTTTTGCCTGCTTTTATGTAATATTCATTTGT  
GTTTTATTTTTATCCATGCC

In100 candidate4006 (in intron):

LOCUS ENSG00000112531

DESCRIPTION Quaking protein (Hqk). [Source:Uniprot/SWISSPROT;Acc:Q96PU8]

CTGAAAATACATTTCCAATTTTATTTTCTAAATTATAACCGCTAGTCATGTCATTTTATTTGTTGTTTCAGTCATCCCTT  
CCCAGTATTTCTGTTTAATT

In100 candidate4007 (in intron):

LOCUS ENSG00000112531

DESCRIPTION Quaking protein (Hqk). [Source:Uniprot/SWISSPROT;Acc:Q96PU8]

TCTATTTTCATTTTCATATGATAGTAACTTTTTCCTTCTTTTAATTTTGAGGTCTTTATTTTTTTCTCCCCAAATACCAGTT  
ATTTTCATGCAGCATCTTTTC

In100 candidate4008 (in intron):

LOCUS ENSG00000112531

DESCRIPTION Quaking protein (Hqk). [Source:Uniprot/SWISSPROT;Acc:Q96PU8]

TTTTCAATTTTCCTTCATTGACTGCTACTAACTATTAGTTGTTAGTTGTATTTTATTTCTATTTTTTTCTTGTTAACCAGTT  
TTTTTTTTTTTTTTTGTGGGA

In100 candidate4009 (in intron):

LOCUS ENSG00000116209

DESCRIPTION Transmembrane protein 59 precursor (Liver membrane-bound protei).

[Source:Uniprot/SWISSPROT;Acc:Q9BXS4]

TTGTCTGTATTTTTTAAATTAACCTCCAAACTGTTTTTCTAATTTAACCTGTCTAACTCCATCCTTTGCTGTGTCCAGAT  
TTTTTTTTTCTAAATTCATC

In100 candidate4010 (in intron):

LOCUS ENSG00000112541

DESCRIPTION cAMP and cAMP-inhibited cGMP 3',5'-cyclic phosphodiesterase

10A(EC 3.1.4.17). [Source:Uniprot/SWISSPROT;Acc:Q9Y233]

CCCAATGGGTTTAACACTTCACTTGGATTCTTATTACTTTTTCTTTTTTTTTTTAATTGAATGCCTCCTACACTCAGCA

TTCCTTACTTCTATTTGATC

In100 candidate4011 (in intron):

LOCUS ENSG00000112541

DESCRIPTION cAMP and cAMP-inhibited cGMP 3',5'-cyclic phosphodiesterase  
10A(EC 3.1.4.17). [Source:Uniprot/SWISSPROT;Acc:Q9Y233]

TGTGTCTTTTATGTCTACTGTAGGAAATCATTGCCTAACTCAATATATTCTCCTGTTTTCTTATACACATTTTACAGTTT  
TCACCCTTATATGTGCATCT

In100 candidate4012 (in intron):

LOCUS ENSG00000112541

DESCRIPTION cAMP and cAMP-inhibited cGMP 3',5'-cyclic phosphodiesterase  
10A(EC 3.1.4.17). [Source:Uniprot/SWISSPROT;Acc:Q9Y233]

AGCCTGTTTCTCCAACTTAACTACGTTCCATGTTTCACTTCATTCACTGTGTGCGCAGCCATAATGGCATTTCCTTTTTGT  
TCCTCAAACCTGCCTTGCTT

In100 candidate4013 (in intron):

LOCUS ENSG00000071242

DESCRIPTION Ribosomal protein S6 kinase alpha-2 (EC 2.7.11.1) (S6K-alpha  
2)(90 kDa ribosomal protein S6 kinase 2) (p90-RSK 2) (Ribosomal S6 kinase 3)

RSK-3) (pp90RSK3) (MAP kinase-activated protein kinase 1c) (MAPKAPK1C).

[Sorce:Uniprot/SWISSPROT;Acc:Q15349]

CTTCCACCCTGTGGGTTGTCTGTAACTCTGCTGATCATTTCTTTTGCTGTGCAGAAGCTTTTAAATTTAATTAAGTCCC  
ATCTATTTATCTTTGTTTTT

In100 candidate4014 (in intron):

LOCUS ENSG00000071242

DESCRIPTION Ribosomal protein S6 kinase alpha-2 (EC 2.7.11.1) (S6K-alpha  
2)(90 kDa ribosomal protein S6 kinase 2) (p90-RSK 2) (Ribosomal S6 kinase 3)

RSK-3) (pp90RSK3) (MAP kinase-activated protein kinase 1c) (MAPKAPK1C).

[Sorce:Uniprot/SWISSPROT;Acc:Q15349]

CTTCTGCTGCTTTTCACCGTGTAACAAATCAAGGTTTTTTTCACTCTTGCCTTTTACTCCAGTGTCTTCTGGTCATCAAG  
GTTTGATTCTTTTACCTCCC

In100 candidate4015 (in intron):

LOCUS ENSG00000071242

DESCRIPTION Ribosomal protein S6 kinase alpha-2 (EC 2.7.11.1) (S6K-alpha  
2)(90 kDa ribosomal protein S6 kinase 2) (p90-RSK 2) (Ribosomal S6 kinase 3)

RSK-3) (pp90RSK3) (MAP kinase-activated protein kinase 1c) (MAPKAPK1C).

[Sorce:Uniprot/SWISSPROT;Acc:Q15349]

CCATATTTCTTAACCCCCCTTTCATATTTCTGTATTTCTGTCTTTCTCTCAATTATCATCAGATCCAACGTCTCTTTTA  
CCAACTCTTTGTTGGACTTT

In100 candidate4016 (in intron):

LOCUS ENSG00000071242

DESCRIPTION Ribosomal protein S6 kinase alpha-2 (EC 2.7.11.1) (S6K-alpha

2)(90 kDa ribosomal protein S6 kinase 2) (p90-RSK 2) (Ribosomal S6 kinase 3) RSK-3) (pp90RSK3) (MAP kinase-activated protein kinase 1c) (MAPKAPK1C).

[Sorce:Uniprot/SWISSPROT;Acc:Q15349]

TCTGCCCTGGAGGTAATGCTGAAATTTGACTTTGTGTATAACTGATGTGTGTTACCTTTGTCATGTCTTCAGAATAAACT  
GTGGTCATTCTTTTTTCTTTC

In100 candidate4017 (in intron):

LOCUS ENSG00000071242

DESCRIPTION Ribosomal protein S6 kinase alpha-2 (EC 2.7.11.1) (S6K-alpha 2)(90 kDa ribosomal protein S6 kinase 2) (p90-RSK 2) (Ribosomal S6 kinase 3) RSK-3) (pp90RSK3) (MAP kinase-activated protein kinase 1c) (MAPKAPK1C).

[Sorce:Uniprot/SWISSPROT;Acc:Q15349]

AAAGGGAATAATTATACGGGACATGCTTGTGTCTGTACCCATTAAGTAGAGTAACTTGCATTTTTTTTACTTACAGACT  
TGTTTTTTTCCCAATACCCT

In100 candidate4018 (in intron):

LOCUS ENSG00000157216

DESCRIPTION Single-stranded DNA-binding protein 3 (Sequence-specific single stranded-DNA-binding protein). [Source:Uniprot/SWISSPROT;Acc:Q9BWW4]

AGGACTAACTTTGTGCTAACTTTTCGAGTATTTCTTTTCAGGCTGTTTTCCTACTTTTACTTTTACTTTTTTCACATCATC  
TTCTTCTGGTCAGAAAATTC

In100 candidate4019 (in intron):

LOCUS ENSG00000162402

DESCRIPTION Ubiquitin carboxyl-terminal hydrolase 24 (EC 3.1.2.15) (Ubiquitin thioesterase 24) (Ubiquitin-specific-processing protease 24) (Deubiquitinating enzyme 24). [Source:Uniprot/SWISSPROT;Acc:Q9UPU5]

GAATAATTTGAAGTATAGGAGACCTAACATTTGAGAAGGCCATTTACCTTTTCAGTTTATCATTTTATAAAATATAATTT  
TTATTTATTTTTCATTTTCT

In100 candidate4020 (in intron):

LOCUS ENSG00000130396

DESCRIPTION Afadin (Protein AF-6). [Source:Uniprot/SWISSPROT;Acc:P55196]

TTTTGATAACTTTTTGTTCAATTTATTGCCATTCTCTCTTGTAGCTCGTTCTACAGGTGAATTTTCAGATACAGCTTTGGTT  
CATCCTTTTTTGTCTCCTT

In100 candidate4021 (in intron):

LOCUS ENSG00000173406

DESCRIPTION Disabled homolog 1. [Source:Uniprot/SWISSPROT;Acc:075553]

TAACAATGCCCACTTGCCTTTTTTGTTTCTCTCACATTATTTCAAACACTGTATCACATAGTTACTTTACTTCCAGGTG  
TCTCACTTCTTCTATACTCT

In100 candidate4022 (in intron):

LOCUS ENSG00000173406

DESCRIPTION Disabled homolog 1. [Source:Uniprot/SWISSPROT;Acc:075553]

TCCCTCCCTCTCTGCTTTATTTAACTTTCAATTTCTTTCAATTCTTCAATTTGTTTCATACCATGCCACTTCAGCTCCC  
TTACTGGTCTACACTTTTAT

In100 candidate4023 (in intron):



LOCUS ENSG00000173406

DESCRIPTION Disabled homolog 1. [Source:Uniprot/SWISSPROT;Acc:O75553]

AGTGTGCTTATGATGCCCATTTAACATAAAATTGAATTGATTTGCTTCAGTCTGCTTTTAGTTCTACGATCCCCCTTACC  
ATCCCTATTAATTTAATTTT

In100 candidate4024 (in intron):

LOCUS ENSG00000112562

DESCRIPTION SPARC-related modular calcium-binding protein 2 precursor

(Secreted modular calcium-binding protein 2) (SMOC-2) (Smooth muscle-associated  
protein 2) (SMAP-2). [Source:Uniprot/SWISSPROT;Acc:Q9H3U7]

TAACAACAAAATGAATCTCTTTGTTTTTGTCTTCTATATTTTCACTCAGTGGAATAGGCCTCCATCCTGCCGCTGCTTTC  
TGTGGTCTTTTCTTTCTTTT

In100 candidate4025 (in intron):

LOCUS ENSG00000112562

DESCRIPTION SPARC-related modular calcium-binding protein 2 precursor

(Secreted modular calcium-binding protein 2) (SMOC-2) (Smooth muscle-associated  
protein 2) (SMAP-2). [Source:Uniprot/SWISSPROT;Acc:Q9H3U7]

AGGGTCTGTGCTCTCAAGCACTAACGGTGACCTGCACTACATTCCTTTTTTTTTTTTTTTTTTTGTGAGACAGAGTTTTGC  
TTTTGTTGCCCAGGCTTCTG

In100 candidate4026 (in intron):

LOCUS ENSG00000172456

DESCRIPTION Novel protein. [Source:Uniprot/SPTREMBL;Acc:Q5VSS0]

TTGTAAC TATTTTATATTTGTAACATTTATTCTTTGTTTACCTTTTTTTCCTCTTGGCCTTTCAC TGGTATTCATCAGGC  
ATTTTATGTGATTCATTTT

In100 candidate4027 (in intron):

LOCUS ENSG00000130023

DESCRIPTION CDNA FLJ11152 fis, clone PLACE1006901. (Fragment).

[Source:Uniprot/SPTREMBL;Acc:Q9NUT5]

GTTAATGGGGAACTGAAGGGAGTATGGGTAATTTGGGGCCTAACCCAAAATCTTGTTTTCATTTGTTTTTTTGGTCAGTT  
TTTCTTCATTTTATTTGGCA

In100 candidate4028 (in intron):

LOCUS ENSG00000162598

DESCRIPTION Uncharacterized protein Clorf87.

[Source:Uniprot/SPTREMBL;Acc:QN0U7]

TGGCTTGTTATTGTGTAAC TCCAATCTCTGCCTTTGTTTT CACAAGGCCTTCTTCTTTCTGTCTTCTATATATCTCAGTA  
TCCAAGTGTTCTTCTTT

In100 candidate4029 (in intron):

LOCUS ENSG00000162598

DESCRIPTION Uncharacterized protein Clorf87.

[Source:Uniprot/SPTREMBL;Acc:QN0U7]

AGAGACTCTAACACCATCAAGACTTCCTATATCTTTTTTCTTCTCTCGTTGTCAGCTTCATATTCTCTCTCTTTCTCAGT  
AGACCAGCTTTTTCTCATTT

In100 candidate4030 (in intron):

LOCUS ENSG00000162599

DESCRIPTION Nuclear factor 1 A-type (Nuclear factor 1/A) (NF1-A) (NFI-A) (NI/A) (CCAAT-box-binding transcription factor) (CTF) (TGGCA-binding protein.

[Source:Uniprot/SWISSPROT;Acc:Q12857]

TGTATGCTATTATTTAACTAAAACCAAGCAAGCATTTTCTCCTTCTCTTCAGTTATAGGTTAACATGAGATTTTCATTTT  
TTTTTTCTTTTGGCTTTTCT

In100 candidate4031 (in intron):

LOCUS ENSG00000162599

DESCRIPTION Nuclear factor 1 A-type (Nuclear factor 1/A) (NF1-A) (NFI-A) (NI/A) (CCAAT-box-binding transcription factor) (CTF) (TGGCA-binding protein.

[Source:Uniprot/SWISSPROT;Acc:Q12857]

TCTGGCTTCTGTATCTACCTTTCTAACCCCACTTTTTTTTTTTTTTTTTTTTTTAACCGTGACTCCTTAGATGCTCCAGCC  
ATACTGGTTTCCTTTTCAGTT

In100 candidate4032 (in intron):

LOCUS ENSG00000125703

DESCRIPTION Cysteine protease ATG4C (EC 3.4.22.-) (Autophagy-related protei 4  
homolog C) (Autophagin-3) (Autophagy-related cysteine endopeptidase 3) (UT-like  
3 cysteine endopeptidase). [Source:Uniprot/SWISSPROT;Acc:Q96DT6]

ACAATTTTGTCTTTATTTTATAGTTAGCTCTAAGATTTTAACCTGATATGCTTTCTCTGTTTAATTTTTCAGTTGCAGCT  
CTCATTCAGTTTATCATTTTC

In100 candidate4033 (in intron):

LOCUS ENSG00000158966

DESCRIPTION cache domain containing 1

[Source:RefSeq\_peptide;Acc:NP\_065976]EXON

CTATCATTTGCTAACTCACATGAACTTCATGGGATTTTTTTTTTCCCCACTTGGATTACTCCGTGTGCCTCTGCCAGAA  
TACTGGCCTTCTTTGTTCTA

In100 candidate4034 (in intron):

LOCUS ENSG00000158966

DESCRIPTION cache domain containing 1

[Source:RefSeq\_peptide;Acc:NP\_065976]EXON

TACTAAAGATTAGTTAGAACTAGACAATGTTTTTATAAGTAATTTTAACTAATGGCTAATTTTTACTTTTTGTCTCAGGC  
CTAACTTTTCATTTTAAATG

In100 candidate4035 (in intron):

LOCUS ENSG00000162437

DESCRIPTION Ribonucleoprotein PTB-binding 2 (Protein raver-2).

[Source:Unipot/SWISSPROT;Acc:Q9HCJ3]

ATTGGCATAACATTGTTTCATAGTATTCCCTTATTATTCTTTAATCTCTGCAGGATCTATAGTGATGGCCTCTTTCACATT  
CCTGATATTTTTGTCTTCTC

In100 candidate4036 (in intron):

LOCUS ENSG00000116675

DESCRIPTION Putative tyrosine-protein phosphatase auxilin (EC 3.1.3.48) (DnJ

homolog subfamily C member 6). [Source:Uniprot/SWISSPROT;Acc:O75061]

AAGCTAGCTCCTGAATGCTTCTAACACACTCAAGTAGTCTTTGATGCTTTCCTTGCTTTCTGGTATCACCAGATGTTCCA  
GGCTCATCTTGTATGTTTTTC

In100 candidate4037 (in intron):

LOCUS ENSG00000116675

DESCRIPTION Putative tyrosine-protein phosphatase auxilin (EC 3.1.3.48) (DnJ

homolog subfamily C member 6). [Source:Uniprot/SWISSPROT;Acc:O75061]

TAACAATATTATTTCTTCTAATCCATGAGCATGGAATACCTTTCCTTTTTTTGTGTCCTCTTCTATTTCTTTCATCAGAG  
TTTTACAGTTCTTCTTGTGT

In100 candidate4038 (in intron):

LOCUS ENSG00000116678

DESCRIPTION Leptin receptor precursor (LEP-R) (OB receptor) (OB-R)

(HuB219)(CD295 antigen). [Source:Uniprot/SWISSPROT;Acc:P48357]

AGAAAATTGCCGCAAATATCTTCTAAAGATAACCACAAATTGCACTTTATGTGTTTCCATTCAGTTTTTCTTCTTTTTTT  
GTAGCTATAATCTTTTAGAC

In100 candidate4039 (in intron):

LOCUS ENSG00000184588

DESCRIPTION cAMP-specific 3',5'-cyclic phosphodiesterase 4B (EC 3.1.4.17)

(PDE4) (PDE32). [Source:Uniprot/SWISSPROT;Acc:Q07343]

AGCTGTAGATTTCCCTGAACATGCTGCTTTAGCTGCATCCTACAAATTTTAACATATAATGTTTTCGTTGTCATTTCAGTT  
CAAAATACTTTTCTCTTTTC

In100 candidate4040 (in exon):

LOCUS ENSG00000184588

DESCRIPTION cAMP-specific 3',5'-cyclic phosphodiesterase 4B (EC 3.1.4.17)

(PDE4) (PDE32). [Source:Uniprot/SWISSPROT;Acc:Q07343]

GATGAACTCACACTGAGATCACCTAATGCCTGACACCTAACGATGCCTCACATGCTTTTCTATTTCCAGCAGCGCTTCAT  
ACTTAAAATCTTTCTCTCTT

In100 candidate4041 (in intron):

LOCUS ENSG00000118473

DESCRIPTION SH3-containing GRB2-like protein 3-interacting protein 1

(Endopilin- 3-interacting protein). [Source:Uniprot/SWISSPROT;Acc:Q9BQI5]

CTTCTGAGACTCCAAATGATAACTATTTTGTTATAGTCTCACATGTCCTTAAGGCTCTGTTTCATTTTTTTTTTCTCAGTC  
TATTTTCTCTATTTTCTGAT

In100 candidate4042 (in intron):

LOCUS ENSG00000118473

DESCRIPTION SH3-containing GRB2-like protein 3-interacting protein 1

(Endopilin- 3-interacting protein). [Source:Uniprot/SWISSPROT;Acc:Q9BQI5]

TTCTCCTTGGATCTTCTGAAAGATTCATTAAGATATGAATAACTTACTTTCATAACTTCATTTGCTTTAGTCTTTCAGTT  
TTCTTCATATTTTTTGTA

In100 candidate4043 (in intron):

LOCUS ENSG00000116704

DESCRIPTION UDP-glucuronic acid/UDP-N-acetylgalactosamine transporter (UDPGlcA/UDP-GalNAc transporter) (Solute carrier family 35 member D1) (UDP-galatose transporter-related protein 7) (UGTrel7). [Source:Uniprot/SWISSPROT;Ac:Q9NTN3]  
TCATAATTACATCTTGTAAGTACCATGACTTTATCTTATTTTCCTACCCATATTTTCTCTTTAGTCAGATGACTTTAAC  
TGCTTAGTTTTTAGTCTTTT

In100 candidate4044 (in intron):

LOCUS ENSG00000142864

DESCRIPTION Plasminogen activator inhibitor 1 RNA-binding protein (PAI1 RNA binding protein 1) (PAI-RBP1) (SERPINE1 mRNA-binding protein 1).  
[Source:Uiprot/SWISSPROT;Acc:Q8NC51]  
GGCTTCCTGTTTGGCTTTAAAACTCATAAAGCCCTAACTATATTATTTCTTCTCCTAAATTCATTTTCTCTATCAGCT  
TCCTTTAACCTTTTGACATT

In100 candidate4045 (in intron):

LOCUS ENSG00000116729

DESCRIPTION Integral membrane protein GPR177 precursor (Protein wntless homlog) (Putative NFkB-activating protein 373).  
[Source:Uniprot/SWISSPROT;Acc:5T9L3]

TGGTTTTCTTAGCTCTGGTAACATTGTTATCAATTCTTCATTTATATTCCATTTTCCAGAAGTTTGTTGCTGGTATCTCA  
TCTCATATTTTGCCCATCT

In100 candidate4046 (in intron):

LOCUS ENSG00000024526

DESCRIPTION DEP domain containing 1 [Source:RefSeq\_peptide;Acc:NP\_060249]

AACAATATATACTATAGTAATGCTTTATTTTTTAACTTTACTATTGTTTTTGTTTTATTTTTGTCCACTGTCATACAGTT  
GCATCTTAATTTTTGTTTCA

In100 candidate4047 (in intron):

LOCUS ENSG00000033122

DESCRIPTION Leucine-rich repeat-containing protein 7 (Protein LAP1)

(Densin180). [Source:Uniprot/SWISSPROT;Acc:Q96NW7]

CTGTGAATGTTTTCTCCATTACATTCCTAACATTGTTTCACACCATTATCTTTTAGTCTTTTAGCAACTTTTCCAGAG  
GTTTTTCTACTTTATTAATC

In100 candidate4048 (in intron):

LOCUS ENSG00000033122

DESCRIPTION Leucine-rich repeat-containing protein 7 (Protein LAP1)

(Densin180). [Source:Uniprot/SWISSPROT;Acc:Q96NW7]

CAAATAAAGATACTGCCACTTTGGTTAACCATTGTTTAAATGTTTACTTTCCTTGTCTGTATTATTATATCTCTCAGGA  
TTCTTTTGTTTCATCCAGCTA

In100 candidate4049 (in intron):

LOCUS ENSG00000116754

DESCRIPTION Splicing factor arginine/serine-rich 11 (Arginine-rich 54 kDa

nuclear protein) (p54). [Source:Uniprot/SWISSPROT;Acc:Q05519]



AATTAGCATTTGTTTTAACTGCTATTCTGTTTCTCTTTTATGTTATTTGTTTATTTTTTAGTGATTGCGCTTTGCCAGTC  
TCATCTCGTGTCTGCTTTGT

In100 candidate4050 (in intron):

LOCUS ENSG00000050628

DESCRIPTION Prostaglandin E2 receptor, EP3 subtype (Prostanoid EP3 receptor  
(PGE receptor, EP3 subtype) (PGE2-R). [Source:Uniprot/SWISSPROT;Acc:P43115  
AACCATGCTGAACTTTTTAACTCCCTGTGAAAAGACCATGCATTTTTGTAATTCCTGCTATTCCCTTTTCCCAGCTTAC  
TTCCCATTCGTTTCATCTTG

In100 candidate4051 (in intron):

LOCUS ENSG00000132485

DESCRIPTION Zinc finger Ran-binding domain-containing protein 2 (Zinc finger  
protein 265) (Zinc finger, splicing). [Source:Uniprot/SWISSPROT;Acc:O95218  
GCAAATTTTATTTGATAACTTCTCACTTTTCTTATTGTCATTTTTTCAGTCATTCTGGTGTCTTGAACCTTTCTCACTTCC  
CTTGCTACAAGTATTTGTCT

In100 candidate4052 (in intron):

LOCUS ENSG00000132485

DESCRIPTION Zinc finger Ran-binding domain-containing protein 2 (Zinc finger  
protein 265) (Zinc finger, splicing). [Source:Uniprot/SWISSPROT;Acc:O95218

TTAACTACTAGAGTTATAGTTCACCTTTCTAATTTTACTATATTTTTGAGCTTTCATATTTGTCATATTACTTTTCAGTT  
TTTTCCTATGTAAATTATTT

In100 candidate4053 (in intron):

LOCUS ENSG00000172260

DESCRIPTION Neuronal growth regulator 1 precursor.

[Source:Uniprot/SWISSPRO;Acc:Q7Z3B1]

TAATAACTGCTTAATACATGTGCTTCTCATCCTAACATTTTATTTTCAGAGTCAATTTTGATTGATATATTTTCCTTCAT  
TACGGTTTTTATTGCTTTTT

In100 candidate4054 (in intron):

LOCUS ENSG00000172260

DESCRIPTION Neuronal growth regulator 1 precursor.

[Source:Uniprot/SWISSPRO;Acc:Q7Z3B1]

TTCTTTTCGAAATTTCTGTAGATAACTCCATATGAACTACATATTTTTTTCTAATTTTTCCTATGGTAGTCTCTTCAGGA  
TCTTTCATTTTTCATATTGA

In100 candidate4055 (in intron):

LOCUS ENSG00000172260

DESCRIPTION Neuronal growth regulator 1 precursor.

[Source:Uniprot/SWISSPRO;Acc:Q7Z3B1]

TTTTGCTTGTTCCAACTTCTTTCTGTTAAAAACAAATATAACAACGACAAAAAATCTTTCTCTTACATATCTGCAGGC  
TCATGTCTTTACCATTTTTG

In100 candidate4056 (in exon):

LOCUS ENSG00000172260

DESCRIPTION Neuronal growth regulator 1 precursor.

[Source:Uniprot/SWISSPRO;Acc:Q7Z3B1]

TTTATCTTTTAATCTATAACAATTTGTGTTAGCTGTTTCATTTTCAGGATTATATTTTCTACAAGTTCCACTTGTGGGACTC  
CTTTTGTTGCCCCCTATTTTT

In100 candidate4057 (in intron):

LOCUS ENSG00000162620

DESCRIPTION LRRC44 protein. [Source:Uniprot/SPTREMBL;Acc:Q6P5P7]

TCCTCACTTGTTTCCTTTCCCAACACTCTTTCTTAACATAGATATGAGTATCTGACCTATATCATTTCTCTTCTCTCAGAA  
CTTCTTTTAACATTTCTTAC

In100 candidate4058 (in intron):

LOCUS ENSG00000162620

DESCRIPTION LRRC44 protein. [Source:Uniprot/SPTREMBL;Acc:Q6P5P7]

CCATAACCAATCAAGCTGTTTCTATATTTCTTCCATTTTCTATCTATAAATACTCCCTGCTCATTTATTACGCAGAGTTT  
TCTAAATTTTCACTGGTTCT

In100 candidate4059 (in intron):

LOCUS ENSG00000116783

DESCRIPTION Serine/threonine-protein kinase TNNI3K (EC 2.7.11.1) (TNNI3-  
interacting kinase) (Cardiac ankyrin repeat kinase).

[Source:Uniprot/SWISSPROTAcc:Q59H18]

GACTACTTGTGATAACTAATTACCTAAGGCTGGAGTAATTTTTCATTCTTTCCCTTTCCTGCTTCTACTTACACTCAGTC  
ACCTTTTCTGGATGTCTCTT

In100 candidate4060 (in intron):

LOCUS ENSG00000137968

DESCRIPTION Choline transporter-like protein 5 (Solute carrier family 44  
meber 5). [Source:Uniprot/SWISSPROT;Acc:Q8NCS7]

AAATATAGCTAGAAAGAAATGTTAGAAAACCCAAGTTGATAACCTTCAAGCTCAATTCATGTTCTTGTTTGCTTCCAGAC  
TTTCTTTTTTAAATCACTATT

In100 candidate4061 (in intron):

LOCUS ENSG00000057468

DESCRIPTION MutS protein homolog 4. [Source:Uniprot/SWISSPROT;Acc:O15457]

CCTTTAGGGAACTTAAGCAATATATTTAACTTTATGCATGATTCATGGCCTTCATTATTTCTTATAATGTTTCTCAGTT  
ATCATTTTTTTTAACCATCTG

In100 candidate4062 (in intron):

LOCUS ENSG00000184005

DESCRIPTION Alpha-N-acetylgalactosaminide alpha-2,6-sialyltransferase 3  
(EC2.4.99.-) (GalNAc alpha-2,6-sialyltransferase III) (ST6GalNAc III)  
(Sialyltransferase 7C) (STY). [Source:Uniprot/SWISSPROT;Acc:Q8NDV1]

TTACTTTTCACTCTTTAAATTACTGGCTTTCTGTAACTTCCTTCTGTGTTTTCTGACATCTACAGTTTCACAATTATTAT  
TCTTCAAGATTTGTCTTCCT

In100 candidate4063 (in intron):

LOCUS ENSG00000117069

DESCRIPTION Alpha-N-acetylgalactosaminide alpha-2,6-sialyltransferase 5

(EC2.4.99.-) (GalNAc alpha-2,6-sialyltransferase V) (ST6GalNAc V) (GD1 alpha  
snthase) (Sialyltransferase 7E). [Source:Uniprot/SWISSPROT;Acc:Q9BVH7]

TTTTTATTATTACTAACCCATTCATGTAGGTTTCTTTTTCTTCTTTAAGACTCCCCAATCCTCTTTTCTTTCCAGTC  
CTTTCAGTGATTTTGTTTTG

In100 candidate4064 (in intron):

LOCUS ENSG00000142892

DESCRIPTION GPI-anchor transamidase precursor (EC 3.-.-.-) (GPI transamidase)  
(Phosphatidylinositol-glycan biosynthesis class K protein) (PIG-K) (hGPI8.  
[Source:Uniprot/SWISSPROT;Acc:Q92643]

CTTTTCTGAGTCCATCTAACACTGTTTTTTTTCTTATTCTGTATTTAGTCTTTTGTGAGATTAATCTTCCTAATTTAAA  
ACTTTTATTCTTTATTTTCCT

In100 candidate4065 (in intron):

LOCUS ENSG00000154027

DESCRIPTION Adenylate kinase isoenzyme 5 (EC 2.7.4.3) (ATP-AMP  
transphosphorylase). [Source:Uniprot/SWISSPROT;Acc:Q9Y6K8]

AGACTTCCTTAACTTCACCTTCCATCTGTTCTATTGAGTTTATTTTCAGCTATCATAGTTTTAATTTTCAAGAGCTCTTTC  
TTTCTTTAACTGTTTCCTTTT

In100 candidate4066 (in intron):

LOCUS ENSG00000154027

DESCRIPTION Adenylate kinase isoenzyme 5 (EC 2.7.4.3) (ATP-AMP  
transphosphoylase). [Source:Uniprot/SWISSPROT;Acc:Q9Y6K8]

AGCTTTTAAGAGTTAACTCTCATGCTTGCTTTTCTGTCCTGAGCCTCTTTCATTTCTGCTTTTGGCAGTTTTCTTTTTTC  
TATACCACATTATATATGAT

In100 candidate4067 (in intron):

LOCUS ENSG00000154027

DESCRIPTION Adenylate kinase isoenzyme 5 (EC 2.7.4.3) (ATP-AMP  
transphosphoylase). [Source:Uniprot/SWISSPROT;Acc:Q9Y6K8]

CTTCCATAGATGGAATCACACTATATAACTGTATATATTATTTTCTAGCTGTCTTCTTTCAGCACATCATTTTAATGACT  
GCATCCTATTTCCTTTATTTT

In100 candidate4068 (in intron):

LOCUS ENSG00000154027

DESCRIPTION Adenylate kinase isoenzyme 5 (EC 2.7.4.3) (ATP-AMP  
transphosphoylase). [Source:Uniprot/SWISSPROT;Acc:Q9Y6K8]

TTCCCTGACCACCCTATAGAAAGTAACACCTCTAGCATTCTGTACCTCTTTGTCCTGCTTTAATTTTGTACCTATCAGTT  
ATCTTCGCTGACTCTTCATT

In100 candidate4069 (in intron):

LOCUS ENSG00000036549

DESCRIPTION zinc finger, ZZ domain containing 3  
[Source:RefSeq\_peptide;Acc:P\_056349]

GGTGTAATATTTGATATTCTGTCTAGAATGTCTTAACCTCTTTTTGCCTTTCCTTTTGAAATCCCATCTATTTTTCAGGA  
TTCAACTTGCTTTTTTACTTC

In100 candidate4070 (in intron):

LOCUS ENSG00000137960

DESCRIPTION PDZ domain-containing protein GIPC2.

[Source:Uniprot/SWISSPROT;cc:Q8TF65]

ATCAAAGCCATTCTATTAGCATAACTCAAGAAATCTATTTTTTTCTGTATTGATCTCCACTACATAATCTGTTTCCAGAG  
TAAATTTTTCTGTTTTTTTT

In100 candidate4071 (in intron):

LOCUS ENSG00000137959

DESCRIPTION histocompatibility 28 [Source:RefSeq\_peptide;Acc:NP\_006811]

TAACTAATTTTACTGTATCCTTTAATCCCTTTTGCCCTTTTCTCTTTTTATTCTTTTTTGTCTCAATACTTCAGTTGGT  
AAATTTTCTTCTAATTCTTT

In100 candidate4072 (in intron):

LOCUS ENSG00000117114

DESCRIPTION Latrophilin-2 precursor (Calcium-independent alpha-latrotoxin  
receptor 2) (Latrophilin homolog 1) (Lectomedin-1).

[Source:Uniprot/SWISSPROTAcc:O95490]

AGGTAAAGGAACTAAACATATGGATTTTCTACCCATTGAGGTACTCTAACCACATGCTAGAGGCATTTTGTTTCTCAGCT  
CTTAGTCATTTTCATTTTTTC

In100 candidate4073 (in intron):

LOCUS ENSG00000117114

DESCRIPTION Latrophilin-2 precursor (Calcium-independent alpha-latrotoxin receptor 2) (Latrophilin homolog 1) (Lectomedin-1).

[Source:Uniprot/SWISSPROTAcc:O95490]

GTGTGTGGTAAGGTAACAATTGAATTGGTTTTATTTCGCTAGCCTCCATAATGCTTTCTCTTGCAGTGTTTTTTGTATTAT  
GCACCAATACATCCTTCTTC

In100 candidate4074 (in intron):

LOCUS ENSG00000117114

DESCRIPTION Latrophilin-2 precursor (Calcium-independent alpha-latrotoxin receptor 2) (Latrophilin homolog 1) (Lectomedin-1).

[Source:Uniprot/SWISSPROTAcc:O95490]

AGTTTAACCTGTGATATCCTGTGTTTTTTCTGCAGTCATTCTACCTTTTTCTCATTCTGGCTTCTCCTTCATTGACTATA  
GATATCCTCTCAGATTCTGT

In100 candidate4075 (in intron):

LOCUS ENSG00000117114

DESCRIPTION Latrophilin-2 precursor (Calcium-independent alpha-latrotoxin receptor 2) (Latrophilin homolog 1) (Lectomedin-1).

[Source:Uniprot/SWISSPROTAcc:O95490]

AGCTTTTTGTTTCATTTAACTTTGGTATTTTTTGTTTGTTTGTTTCAGTTTCATTTAATTCTGCTCTGATCTCGGTTATT  
TCCTTTCTTATGCTGGCTTT

In100 candidate4076 (in intron):

LOCUS ENSG00000117114



DESCRIPTION Latrophilin-2 precursor (Calcium-independent alpha-latrotoxin receptor 2) (Latrophilin homolog 1) (Lectomedin-1).

[Source:Uniprot/SWISSPROTAcc:O95490]

TTACTAAATCACCAAATAGAGAAACCTAGATAACTGTGATGACCCTGCCTAATATTTAGCTCTCTCTATTCTCTGCAGAACTTTTTTCTTCATGCCCTA

In100 candidate4077 (in intron):

LOCUS ENSG00000142875

DESCRIPTION cAMP-dependent protein kinase, beta-catalytic subunit (EC 2.7.1.11) (PKA C-beta). [Source:Uniprot/SWISSPROT;Acc:P22694]

AGTTGTAAAATATTTTTCTTTCTGATTTTGTTAACTTGGATCTTCTCTCTTTTTTCTTGGTTAGCTAGCTAGCAGTTTATCAATTTTGGTTATTTTT

In100 candidate4078 (in intron):

LOCUS ENSG00000117133

DESCRIPTION Ribosome production factor 1 (Ribosome biogenesis protein RPF1)(Brix domain-containing protein 5). [Source:Uniprot/SWISSPROT;Acc:Q9H9Y2]

ATGTGTTTCCCCCTAGTAGATAACTATCTTGATCTCTATTTCTTCTCCTTGTTACTTCTGCACAGTTTTAAGCCTTTTCATTTCAGTGTTGGCCATTCTTC

In100 candidate4079 (in intron):

LOCUS ENSG00000153898

DESCRIPTION Mucolipin-2. [Source:Uniprot/SWISSPROT;Acc:Q8IZK6]

AGCATCTCTGGCTTTTATTTAACCCACTGTATGGGTGGCTTTCTATTCTATTTTCAGATCTTATTTTTATGCCTTCAAATA  
CTATGCTTTTTTTCTTTGAT

In100 candidate4080 (in exon):

LOCUS ENSG00000142867

DESCRIPTION B-cell lymphoma/leukemia 10 (B-cell CLL/lymphoma 10) (Bcl-10)  
(ED- 3/ICH-1 prodomain homologous E10-like regulator) (CIPER) (CARD- containng  
molecule enhancing NF-kappa-B) (Cellular homolog of vCARMEN) (cCARMEN) (ammalian  
CARD-containing adapter molecu [Source:Uniprot/SWISSPROT;Acc:09599]

TCTAGGATAGCTAACTGTAAATCATGTTGATCATGTACTTTTGTAGTAATTTCTTTTTTTCCTTTTAAAGGTCTTTCAGTA  
CTTTTTTAAATATTTTCTAT

In100 candidate4081 (in exon):

LOCUS ENSG00000153904

DESCRIPTION NG,NG-dimethylarginine dimethylaminohydrolase 1 (EC 3.5.3.18)  
(imethylargininase-1) (Dimethylarginine dimethylaminohydrolase 1) (DDAHI) (DAH-  
1). [Source:Uniprot/SWISSPROT;Acc:094760]

GGAGAAACCTCTGAGAAAATGAAAACATCCTTAACCACTATCTTCCCTTTTATTTGATTATTTTATGTCAGAAATTTGC  
AAAAGTTTTTTTCTCCTCCT

In100 candidate4082 (in intron):

LOCUS ENSG00000117174

DESCRIPTION CDNA FLJ20760 fis, clone HEP01082 (Chromosome 1 open reading frme  
181) (Novel protein). [Source:Uniprot/SPTREMBL;Acc:Q9NWK9]

AAGAGGTGTTTAAGTTCCACATGTCTGGTAGTAGTTAACTGTATCGTGTATTACTTTTTTTGTTTATTTGTTTAACAGCT

TCTTTTGACCAAATTCATTT

In100 candidate4083 (in intron):

LOCUS ENSG00000117174

DESCRIPTION CDNA FLJ20760 fis, clone HEP01082 (Chromosome 1 open reading frame 181) (Novel protein). [Source:Uniprot/SPTREMBL;Acc:Q9NWK9]

TGGGCAACAAAGCGAGACTCCATATCAAAAAAGAAAAAGAAATTAGTAACTTGTTTTAGAGCTTTCCTAATGTCAGAA  
TATTTGATTTTTTTTTTATTT

In100 candidate4084 (in intron):

LOCUS ENSG00000171502

DESCRIPTION collagen, type XXIV, alpha 1 [Source:RefSeq\_peptide;Acc:NP\_69080]

TACATTTGCCTTTTGAAATTTTTTTGGCATTAACCTTTGGATAGGTTATTCTCACTCAGTAAAGGCTATTTTAATGTTTT  
TCTTTTTTATTATTACTTTC

In100 candidate4085 (in intron):

LOCUS ENSG00000171502

DESCRIPTION collagen, type XXIV, alpha 1 [Source:RefSeq\_peptide;Acc:NP\_69080]

AACAAGCATATCAAACATAACATGTCCAAACTTAGCTTCTTATTTACCCTCCAAACCTGTTTTAGTCTTCTTCATTTCA  
TTTGGTCTGCTACTCTTACA

In100 candidate4086 (in intron):

LOCUS ENSG00000171502

DESCRIPTION collagen, type XXIV, alpha 1 [Source:RefSeq\_peptide;Acc:NP\_69080]

CCATTTTCATCATGTCAACATGTAACCATACTGAGATGCTGCCTTCTCTGTAAAGTCTTTTCTCATGTTTTCAACCAGAT  
ATAATCTCTTCTGCCTTTGT

In100 candidate4087 (in intron):

LOCUS ENSG00000183291

DESCRIPTION 15 kDa selenoprotein precursor.

[Source:Uniprot/SWISSPROT;Acc:O0613]

GTCTCTTTTTTCATTTATATTTTCACGTGTTTGTGATTTTGAAAATAACATAATTCAAACATTTTTCTTTAACCTCAGAA  
CATATACTTCTTTGTTATCC

In100 candidate4088 (in intron):

LOCUS ENSG00000153936

DESCRIPTION Heparan sulfate 2-O-sulfotransferase 1 (EC 2.8.2.-) (2-O-sulfotransferase)

(2OST). [Source:Uniprot/SWISSPROT;Acc:Q7LGA3]

AATAAAATTCTCTTTTTTTTAACTGTGTACCTTCATGATCTCATTTACTCCTTTTACATCAGCTGATGCCTTTGTGTTGT  
GACTCTTAATTTCTATCTTT

In100 candidate4089 (in intron):

LOCUS ENSG00000162645

DESCRIPTION Interferon-induced guanylate-binding protein 2 (GTP-binding protein 2) (Guanine nucleotide-binding protein 2) (GBP-2) (HuGBP-2).

[Source:Uniprot/SWISSPROT;Acc:P32456]

TTCTTTTTTTAGTCTAACTAGAAGTATATCCATCTTATGTATTTTCCAGAGAACCATTGGTTTCATTGATCTTTTGTATG

GTTTTTCTTGTCTCCACTTT

In100 candidate4090 (in intron):

LOCUS ENSG00000171488

DESCRIPTION Leucine-rich repeat-containing protein 8C (Protein AD158).

[Source:Uniprot/SWISSPROT;Acc:Q8TDW0]

CAAAGGTCTAATCTGATTCTTAGCATCTTTAACTTTTGAATCACATCCTTTTTTGTTGTCTTGAGTCAGAAACATGTACT

CATTCTATAGTTTTTCCTTT

In100 candidate4091 (in intron):

LOCUS ENSG00000171492

DESCRIPTION Leucine-rich repeat-containing protein 8D.

[Source:Uniprot/SWISPROT;Acc:Q7L1W4]

TAATCAAATTATTAACCTCCCTGGTAATCTAACCTTTTTTTTTTGGTTTGGCCACCTTTCAGCCTGTTAAGGTGTTTTCA

TTGCTAACTCTTTCTATCCT

In100 candidate4092 (in intron):

LOCUS ENSG00000162669

DESCRIPTION CDNA FLJ36760 fis, clone UTERU2018867.

[Source:Uniprot/SPTREMBLAcc:Q8N9Q0]

TACTGCCATCTCTTTTTGTACTGCTTCTTTAAGGTCAATAACTCTTAGATTTGCCCTTTGAGGCTATTTTCCAGATCTT

ATAGGTGTACTTCATTTTTT

In100 candidate4093 (in intron):

LOCUS ENSG00000097046

DESCRIPTION Cell division cycle 7-related protein kinase (EC 2.7.11.1)  
(CDCrelated

kinase) (HsCdc7) (huCdc7). [Source:Uniprot/SWISSPROT;Acc:000311]

EXON

TTGACTTCCATGCTAATAACTCTTCCTTCAAAATTCCTTTCTTATTTGGCTCTCTAACTTGGCTTCTTCCAAGCTCAGTT  
TTCTTTTCTCGCTATTAATT

In100 candidate4094 (in intron):

LOCUS ENSG00000069702

DESCRIPTION TGF-beta receptor type III precursor (TGFR-3) (Transforming growth  
factor beta receptor III) (Betaglycan). [Source:Uniprot/SWISSPROT;Acc:Q0167]

AGATAATAAACATTAATTAACATGTGTTTCGGTTTTTCTTTTTGCCTCTGTTTAGTGTCAGCTAAATTTTTTTGGTTTGT  
TCACTCATGTATTCGTTCTT

In100 candidate4095 (in intron):

LOCUS ENSG00000137948

DESCRIPTION Bromodomain testis-specific protein (RING3-like protein).  
[Source:Uniprot/SWISSPROT;Acc:Q58F21]

AGAGAGTTGGACCCTTGACATACTTCCTAGGCTTTTATGACACCTCTCTTAACAATCCCATCTGTCTGTTTCCTTACAGAT  
ATCTCTTTATTTGCCTCCCT

In100 candidate4096 (in intron):

LOCUS ENSG00000203910

DESCRIPTION

CATTCCACACTTGTGTTTAACCTGCTCTTTAACCTATCCATTAAATTGTTTCCAATTTTGATATTTTTTCATTTCAGAA  
TTTCCATTTTATTTACTTTT

In100 candidate4097 (in intron):

LOCUS ENSG00000067208

DESCRIPTION Ecotropic viral integration site 5 protein homolog (EVI-5)  
(Neuroblastoma stage 4S gene). [Source:Uniprot/SWISSPROT;Acc:O60447]

ACCCACCTTTGGAAAAACATCTTTGGAGTCACTTGGTAGCTTTTGTATAACAACCTTAATGATTTTTGTTTTACCAGAA  
TTTTTTTTTCATTGCAAGTTT

In100 candidate4098 (in intron):

LOCUS ENSG00000067208

DESCRIPTION Ecotropic viral integration site 5 protein homolog (EVI-5)  
(Neuroblastoma stage 4S gene). [Source:Uniprot/SWISSPROT;Acc:O60447]

AACCTTCGTGATAAGTTCTAATTCTTTAACATGGCATAAGATTCTTCATAGTTTAGCCCCAGCTTTCTTTCAAGTTTCAT  
CTCTCACCTCTCATTTTGAG

In100 candidate4099 (in intron):

LOCUS ENSG00000154511

DESCRIPTION Novel protein possible ortholog of mouse RIKEN cDNA 2900024C23  
ene. [Source:Uniprot/SPTREMBL;Acc:Q5T7M9]

TATTTTGATTATAACAATTTTATTTTTTAATGTTTTCTTATGCTCTGTAATTGTCTTCATTCCTTTCAGAGATTTTATTT  
TCTATATGTTTATCTTAGCT

In100 candidate4100 (in intron):

LOCUS ENSG00000154511

DESCRIPTION Novel protein possible ortholog of mouse RIKEN cDNA 2900024C23  
ene. [Source:Uniprot/SPTREMBL;Acc:Q5T7M9]

ATTATCCATAATCCCACCACCTCTTGACATTTTGAGATAACAACCCTTAATGTTTTGTTTATTCCTTGCAGTTTCTAAA  
GTTTTTTGGTGATTTCTCTT

In100 candidate4101 (in intron):

LOCUS ENSG00000137962

DESCRIPTION PTPL1-associated RhoGAP 1  
[Source:RefSeq\_peptide;Acc:NP\_004806]EXON

ATCAATTACTGAGAGAAGAGTGCTGAAATCTTAAGTGCATTGGGGATTTGTCTATTTTTTCCATACATTTCTCTCAGTT  
TTTTTCTCATACTCTGGACC

In100 candidate4102 (in intron):

LOCUS ENSG00000117528

DESCRIPTION ATP-binding cassette sub-family D member 3 (70 kDa peroxisomal  
membrane protein) (PMP70). [Source:Uniprot/SWISSPROT;Acc:P28288]

AATTTCTTTCATCTTTGTATCCTGAATTAAATAACCTGTTTCTGGATTTTTTGTTTTTCTCTTCCTCAGTTTACTTTCTC  
GTTTTGGCAGATGCACTCTT

In100 candidate4103 (in intron):

LOCUS ENSG00000172339

DESCRIPTION UDP-N-acetylglucosamine transferase subunit ALG14 homolog.  
[Source:Uniprot/SWISSPROT;Acc:Q96F25]

CAAGGGACCTTGTGGTTTTCTTCTTCTTTGTCTAACCATTCTTAAAGCATTTTCCTGACTTTGCTTCCTGTTTCAGCTTTA



CAGCCAAGCTTCTTCTCTTT

In100 candidate4104 (in intron):

LOCUS ENSG00000188641

DESCRIPTION Dihydropyrimidine dehydrogenase [NADP+] precursor (EC 1.3.1.2)

DPD) (DHPDHase) (Dihydrouracil dehydrogenase) (Dihydrothymine dehydrogenase.

[Source:Uniprot/SWISSPROT;Acc:Q12882]

AGCATTCCTTATTACTCCTAACCACATTTTATTTATTACTCCTGACTACATTTTATTTTCTCTACAGAATTTATTATCAT

CTCTATCTTTACTGTTTTGC

In100 candidate4105 (in intron):

LOCUS ENSG00000188641

DESCRIPTION Dihydropyrimidine dehydrogenase [NADP+] precursor (EC 1.3.1.2)

DPD) (DHPDHase) (Dihydrouracil dehydrogenase) (Dihydrothymine dehydrogenase.

[Source:Uniprot/SWISSPROT;Acc:Q12882]

ATTATTGATATTGAAGAGCACTTTATATAACAAATTATATAATTTTTACCTTTATGTGTTGCAAATATCTTCCCTCAGTT

TGTGGCATATCTTTTCACTC

In100 candidate4106 (in intron):

LOCUS ENSG00000188641

DESCRIPTION Dihydropyrimidine dehydrogenase [NADP+] precursor (EC 1.3.1.2)  
DPD) (DHPDHase) (Dihydrouracil dehydrogenase) (Dihydrothymine dehydrogenase.  
[Source:Uniprot/SWISSPROT;Acc:Q12882]  
TTAAGCTTCATAGGTATGTTGAAGACATAATACCATTTGCTTAAGTTTGTAACACTTTTATTTTTCATTTATTTTCAGTT  
TGTATGTTACATATTCCTTC

In100 candidate4107 (in intron):

LOCUS ENSG00000188641

DESCRIPTION Dihydropyrimidine dehydrogenase [NADP+] precursor (EC 1.3.1.2)  
DPD) (DHPDHase) (Dihydrouracil dehydrogenase) (Dihydrothymine dehydrogenase.  
[Source:Uniprot/SWISSPROT;Acc:Q12882]  
AGTCAAAAGCCTTTAATTATAAGCAAAGCTAACCTAAAGATATTTTTCACATTTTCATATTTTCTTTAATTTTCAGTT  
TTATTTAATATCACCTTCTA

In100 candidate4108 (in intron):

LOCUS ENSG00000188641

DESCRIPTION Dihydropyrimidine dehydrogenase [NADP+] precursor (EC 1.3.1.2)  
DPD) (DHPDHase) (Dihydrouracil dehydrogenase) (Dihydrothymine dehydrogenase.  
[Source:Uniprot/SWISSPROT;Acc:Q12882]  
CTACATTCCCATAAGTTGCCAATAACTGTGAGTGGTATATTCTATTACTTACATTTTCAGTCTTCATTCTACCTAATTTCT  
CTGCAGTATTTTACCTCAAT

In100 candidate4109 (in intron):

LOCUS ENSG00000162627

DESCRIPTION Sorting nexin-7. [Source:Uniprot/SWISSPROT;Acc:Q9UNH6]  
GTGTAGAGCCATCTTGTTTGACCTCCATGTAAGTGAATTTGTGTCTAGTTTCTTTCCTTCTTCTTTAAACACCAGAAGGC

CCTTCTCTTTTATGTCCTGT

In100 candidate4110 (in intron):

LOCUS ENSG00000162627

DESCRIPTION Sorting nexin-7. [Source:Uniprot/SWISSPROT;Acc:Q9UNH6]

AGCATCCTAACATTCCTGTCTACCGTTCTGCTTCATTTTCTCTTTAGCATTTATTACCAGCTGACAGTTCCCATTTTT  
TATTTACCTTGCTTGTAGTT

In100 candidate4111 (in intron):

LOCUS ENSG00000117620

DESCRIPTION UDP-N-acetylglucosamine transporter (Golgi UDP-GlcNAc transportr)  
(Solute carrier family 35 member A3). [Source:Uniprot/SWISSPROT;Acc:Q9Y22]

GTTTCAAGGGAATGACTTGTAACCTTATATTTCTGAGGCTAACTTTCCTCCCAACTGTTGATTCTATCTCTTCAGCATCT  
CAAATTTAGTTCTCCCCTTT

In100 candidate4112 (in intron):

LOCUS ENSG00000156876

DESCRIPTION Spindle assembly abnormal protein 6 homolog (HsSAS-6).  
[Source:niprot/SWISSPROT;Acc:Q6UVJ0]

GAGGGCCTGATACAATTAGCCTTTTAACACCATTTGGATCACTCACCTAGTTGAAGCATTTATCTTTTTCTTTTCCAGTT  
TTCTCCATGATTATTGGTCT

In100 candidate4113 (in intron):

LOCUS ENSG00000137992

DESCRIPTION Lipoamide acyltransferase component of branched-chain alpha-ket acid dehydrogenase complex, mitochondrial precursor (EC 2.3.1.168)

(Dihydrolipoyllysine-residue (2-methylpropanoyl)transferase) (E2)

(Dihydrolipoamidebranched chain transacylase) (BCKAD E2

[Source:Uniprot/SWISSPROT;Acc:P11182

AGCAACACTTAACACATATTGGTCTCTCTTCTTTCTAGAGCTTCCATTCTTGTTTTCTGTGACACCAGTTTCCCAATAT  
TATTCTTTCTTCATCTTTGG

In100 candidate4114 (in intron):

LOCUS ENSG00000137992

DESCRIPTION Lipoamide acyltransferase component of branched-chain alpha-ket acid dehydrogenase complex, mitochondrial precursor (EC 2.3.1.168)

(Dihydrolipoyllysine-residue (2-methylpropanoyl)transferase) (E2)

(Dihydrolipoamidebranched chain transacylase) (BCKAD E2

[Source:Uniprot/SWISSPROT;Acc:P11182

TTTTTACAAGATATAGAATTATTTATATTTTCTTTAACTTGCTTTTTTCTTTTCTTTTTTTTTTTTTTTTGATACAGAG  
TCTTGCTCTGTTGCCTATCT

In100 candidate4115 (in intron):

LOCUS ENSG00000079335

DESCRIPTION Dual specificity protein phosphatase CDC14A (EC 3.1.3.48) (EC 31.3.16) (CDC14 cell division cycle 14 homolog A).

[Source:Uniprot/SWISSPROTAcc:Q9UNH5]

CTTTACTTCTCTGAGTAATTTGCGCACTGTGTTAACTAGTAACTTCGTCTTAGGATTCTTCTCTTGTGTGATTTCACAGTT  
CTTTTAGGCACATTTTCATTT

In100 candidate4116 (in intron):

LOCUS ENSG00000162695

DESCRIPTION zinc transporter like 2 [Source:RefSeq\_peptide;Acc:NP\_598003]

TTACTCTCTGTCCTTAACTGCTCCCCCTTTCTCCCTGGCTTGGCTTCTTTCTTTAGCAGGCACACACTCTTTCTTTCACA  
TGCTCTTGTTCTGTTTAGAT

In100 candidate4117 (in intron):

LOCUS ENSG00000118733

DESCRIPTION Noelin-3 precursor (Olfactomedin-3) (Optimedine).

[Source:Uniprot/SWISSPROT;Acc:Q96PB7]

ATGTTTTAACTGAAAATTGTGTTGTGTCCCTTTCCATTTCTCTTGATTTTGCCTTCCAAATATCTTTTGTCTTTCCAGCT  
TTTTCCCATTTTGGCATCC

In100 candidate4118 (in intron):

LOCUS ENSG00000118733

DESCRIPTION Noelin-3 precursor (Olfactomedin-3) (Optimedine).

[Source:Uniprot/SWISSPROT;Acc:Q96PB7]

AACTCTTTCATATATTTTCTTTACTTTATTTAGCTTTCCAATCCACTAACTCTACCATTTTTTTTCTACTTTATCAGCTC  
CTTCCTAGATTCACCTTCTTT

In100 candidate4119 (in intron):

LOCUS ENSG00000162699

DESCRIPTION HEJ1. [Source:Uniprot/SPTREMBL;Acc:Q96RF1]

AGTAAGATTTGAATTTTTTCAAGTAGATTGTATGGTAACATTTACATTCATTCATTTATTCATTCTAATCAACCTCAGTT  
CCTGAATCTTTGATGTCTCT

In100 candidate4120 (in intron):

LOCUS ENSG00000162631

DESCRIPTION Netrin-G1 precursor (Laminct-1).

[Source:Uniprot/SWISSPROT;Acc:9Y2I2]

GATACTTTGAACTGAATTCATGCTCTTTGTCCTCATAACTCATTATTCTGGTATTCTCTGTACTTCTCTGGCCAGAAACC  
CCCTTTCTTAATCTTTTAGT

In100 candidate4121 (in intron):

LOCUS ENSG00000162631

DESCRIPTION Netrin-G1 precursor (Laminct-1).

[Source:Uniprot/SWISSPROT;Acc:9Y2I2]

GCTTTTTGTTGTTGTTTTTAAATATCTCTTCTAAGGAGAAAAGGAACTAACATTTAAGAAGTTCTTACTGTTTGCCAGAT  
GTTTCATATATATCTCATTT

In100 candidate4122 (in intron):

LOCUS ENSG00000134215

DESCRIPTION Protein vav-3. [Source:Uniprot/SWISSPROT;Acc:Q9UKW4]

CTTCAATTTTAAAGAACACCGGCATAACTCATTTTTCTTTTTTCCCCTGTGTTCTTTTTGACCTTCTTAGCAGCTCCTG  
ACTTTCTCCCTTGGGGATTT

In100 candidate4123 (in intron):

LOCUS ENSG00000134215

DESCRIPTION Protein vav-3. [Source:Uniprot/SWISSPROT;Acc:Q9UKW4]

AGATGATTTATAACTTCTTGGCACAATTGTTATTATTTTAACATTCTTATTTTCTTTATAGCCTACAGTTTACATTTT  
TATTGTTGTATATTTTATT

In100 candidate4124 (in intron):

LOCUS ENSG00000134215

DESCRIPTION Protein vav-3. [Source:Uniprot/SWISSPROT;Acc:Q9UKW4]

AGAATGTACTTTATTTCTTATTTTAAACATTAATATACCTGCTTTGTCTTTGTTCAATTTCTATTTGACCATTAGCAGCT  
ACAAGTTTTCTTTCTTTGTT

In100 candidate4125 (in intron):

LOCUS ENSG00000134215

DESCRIPTION Protein vav-3. [Source:Uniprot/SWISSPROT;Acc:Q9UKW4]

AGGTTCTTAACCATCCACTTAACTTAGTTTCTCCCTTGCCCTTTTAATTCAGCATTCCCATATTCACCTGCCTTTATTTT  
CTGATTTTATTGTATCCTCA

In100 candidate4126 (in intron):

LOCUS ENSG00000085491

DESCRIPTION solute carrier family 25 member 24 isoform 2

[Source:RefSeq\_peptide;Acc:NP\_998816]

AAATAACCTGTCTTTGAGTTCATAGTTTCTTTCTTCTTCTTGATCACTTCTGCAGTTGATGCTCCCATATTGCATTTTAA  
TTTTGTTTCATTGTATTTTTC

In100 candidate4127 (in intron):

LOCUS ENSG00000085491

DESCRIPTION solute carrier family 25 member 24 isoform 2

[Source:RefSeq\_peptide;Acc:NP\_998816]

CTCTGAAGTGCCCTGGAGGCATTTTCCCCATTGTCTTAGTGATTAACATTTCACTCCTTGTTTCTTATGCAGATTTCTGC  
AGCTGGCTTGAATTTTTTCC

In100 candidate4128 (in intron):

LOCUS ENSG00000116266

DESCRIPTION Syntaxin-binding protein 3 (Unc-18 homolog 3) (Unc-18C) (Unc-183)

(Platelet Sec1 protein) (PSP). [Source:Uniprot/SWISSPROT;Acc:O00186]

GCATTGCAACTGAATGTTCTCTATTAACCTGACTTTGAGTCCCCTACTTCTGTCTTCTGTTGTATTTCAGTCTGCTATTAA  
ACCCATTCATTGTATCCTTT

In100 candidate4129 (in intron):

LOCUS ENSG00000065135

DESCRIPTION Guanine nucleotide-binding protein G(k) subunit alpha (G(i) alpa-

3). [Source:Uniprot/SWISSPROT;Acc:P08754]

GCCTTTAATATCATTTCCATTTTCTTTGTTGTTGTTAACTTCCAAGCCTATCCTCCATTGTCTTCATTCTGTGTACAGAT  
TCTTACGGTCCTTATTTGCC

In100 candidate4130 (in intron):

LOCUS ENSG00000143119

DESCRIPTION Leukocyte surface antigen CD53 (Cell surface glycoprotein



CD53)(Tetraspanin-25) (Tspan-25). [Source:Uniprot/SWISSPROT;Acc:P19397]

TACTGATTCCATCAACTATTGAGAGAAGGATATTGAACTATTCAAGTATAACTTATACTTGTCTATATCTTCTTTCAGTT  
CTGTTTCATTTCTGTCTCATA

In100 candidate4131 (in intron):

LOCUS ENSG00000121933

DESCRIPTION Adenosine A3 receptor. [Source:Uniprot/SWISSPROT;Acc:P33765]

GCCATTAATAACTACATTTAAAGTCTCGGTAGGTCACTTTTTCCTTACATGGTGTTCCTGCTGTCCCTTACTCAGGGAAT  
TTTGTTCCTTGTGTATTTT

In100 candidate4132 (in intron):

LOCUS ENSG00000116473

DESCRIPTION Ras-related protein Rap-1A precursor (GTP-binding protein smgplA)  
(Ras-related protein Krev-1) (C21KG) (G-22K).

[Source:Uniprot/SWISSPROTAcc:P62834]

AAGGGAGCATTTCTCTTATGTGCAAATAACCATAGTGGACATGTTTGTCTACATCCAGACCAGTTCCTAGATTCAAAAC  
TTGTCTTTGTTTTTGT

In100 candidate4133 (in intron):

LOCUS ENSG00000116473

DESCRIPTION Ras-related protein Rap-1A precursor (GTP-binding protein smgplA)  
(Ras-related protein Krev-1) (C21KG) (G-22K).

[Source:Uniprot/SWISSPROTAcc:P62834]

CTGGCATGGAAGGAGACCCTTGACCTGAAGGGTGATCATCTTTAACCTGAATTCTGTAACTGTTTCTCAGAAACTCTC  
TCTGAATCTATTTAACTTTT

In100 candidate4134 (in intron):

LOCUS ENSG00000116473

DESCRIPTION Ras-related protein Rap-1A precursor (GTP-binding protein smgplA)  
(Ras-related protein Krev-1) (C21KG) (G-22K).

[Source:Uniprot/SWISSPROTAcc:P62834]

AAAAAAGGTTTGCTTCCTTGCCCTCCTAACTGATCTTCCTTCTCTAGTTTTTCATTCCTCTGTTGCAATCTACAGAGTAC  
TCATAGAGCTTTCTTTTTTC

In100 candidate4135 (in intron):

LOCUS ENSG00000143079

DESCRIPTION CTTNBP2 N-terminal-like protein.

[Source:Uniprot/SWISSPROT;Acc:9P2B4]

TACTGTAAGTAAATTCTTAAATAACTAAGTAAATTCTTTTAATGTCTCTTTTGTCTAGTCTCTTCCATTCTTATTGCTAC  
CATCCTAGTTCATACATTTT

In100 candidate4136 (in intron):

LOCUS ENSG00000116489

DESCRIPTION F-actin capping protein subunit alpha-1 (CapZ alpha-1).

[SourceUniprot/SWISSPROT;Acc:P52907]

AGTTGCAAATCCTAACATTTCTTGTCCTTTTCTTTGCCTTGTTTTTCTCCTTAGCATTTATCACTTGCCAGGTAGTAT

TTTACTTAATCTTCTCTGTT

In100 candidate4137 (in intron):

LOCUS ENSG00000116793

DESCRIPTION Putative homeodomain transcription factor 1.

[Source:Uniprot/SWSSPROT;Acc:Q9UMS5]

TTTTTAACTTTCTAACTGCTTTCTCTTGCTTCCTATCTCTCTTTACCTCCATCTGTTCTTTATAGCAGAGCCAGGTTGT

TGTTTTTTGGTTTCTGTTTT

In100 candidate4138 (in intron):

LOCUS ENSG00000198765

DESCRIPTION Synaptonemal complex protein 1 (SCP-1).

[Source:Uniprot/SWISSPRT;Acc:Q15431]

ACCCGAAACCAAAATAAAAACCTTCATTAATTTTCTAACTCTTCTTTGACTCTTAATCTCTTTTTTCTATTTCAACAGTT

TTGCCTTTCTATACCTTATC

In100 candidate4139 (in intron):

LOCUS ENSG00000198765

DESCRIPTION Synaptonemal complex protein 1 (SCP-1).

[Source:Uniprot/SWISSPRT;Acc:Q15431]

TTTtagTTACTAAGATGTTTATTTTAAGATGTTATTCTTCTTTTTCTAACCTGCCATTCTACTTTATCTAGTTTTCAGTT

TCTTCTTATTTTCGAGGTTG

In100 candidate4140 (in intron):

LOCUS ENSG00000198765

DESCRIPTION Synaptonemal complex protein 1 (SCP-1).

[Source:Uniprot/SWISSPRT;Acc:Q15431]

AAAATATACTAACTTAGAAGTTCCTCTTAACATCATTTGAATCTTTTCCTTTTCTTGATTCCACAGATCTAGAACAG  
TTCAATTCCTCATTTTCTCT

In100 candidate4141 (in intron):

LOCUS ENSG00000116815

DESCRIPTION Lymphocyte function-associated antigen 3 precursor (Ag3) (Surface glycoprotein LFA-3) (CD58 antigen). [Source:Uniprot/SWISSPROT;Acc:P19256]EXON

TTTATTGCCAACTATCTGCATAACTAGATTTTAAGTTCCTTGTATGCAGAAGTCATGTATTATTTTTTAAAATTTTCCTT  
ATATTGATCTGTTTTTTTTT

In100 candidate4142 (in intron):

LOCUS ENSG00000134258

DESCRIPTION V-set domain containing T cell activation inhibitor 1

[Source:RfSeq\_peptide;Acc:NP\_078902]

AAATACAAAAAAGCACAAAGGAAAAAATATCTATCGGTCCTAACCTAGAGATAACCACTATTTATATGTCCTTCCAGTC  
TTTTTTTTTCCGTCTCTCTCT

In100 candidate4143 (in intron):

LOCUS ENSG00000198162

DESCRIPTION Mannosyl-oligosaccharide 1,2-alpha-mannosidase IB (EC 3.2.1.113 (Processing alpha-1,2-mannosidase IB) (Alpha-1,2-mannosidase IB) (Mannosidase alpha class 1A member 2)). [Source:Uniprot/SWISSPROT;Acc:O60476]

TGTGCCATTAAAAGTGAGCTCACTTCATGTTCTTGTTGAATTCTAACTGAAGCTCATTTCTCCCCTTTTATTTTCAGAT  
ATTTGTATCTGCTGTTCTCC

In100 candidate4144 (in intron):

LOCUS ENSG00000196505

DESCRIPTION ganglioside induced differentiation associated protein 2

[Source:RefSeq\_peptide;Acc:NP\_060156]

ATTTTCCAAATTGTGTTTATGTTTCTAACTATGGCAACTAGCTTAAATTATTTTTTCTCTTCTATTAATCAGGTGTCAAC  
ATGGTTTTTTTACCACCTTTT

In100 candidate4145 (in intron):

LOCUS ENSG00000155761

DESCRIPTION projection protein PF6 [Source:RefSeq\_peptide;Acc:NP\_996879]

AATCGTTTGTTGCTAATACACACCTAAAGAAAAGCCCTTAACTTGGTATGTCATTCTTCCATACGTTATCACATTCAGCT  
TCATGTGCCTTTTATACATTT

In100 candidate4146 (in intron):

LOCUS ENSG00000155761

DESCRIPTION projection protein PF6 [Source:RefSeq\_peptide;Acc:NP\_996879]

AGTCTTACTAATATTTTAAAGAAATCTGTTCTTGCTTTCTAACTCTTCTCCTTTTATCTCATTTAATTTTGCCAGCATC  
TTGTTTATTTCTCCTCTTTA

In100 candidate4147 (in intron):

LOCUS ENSG00000092607

DESCRIPTION T-box transcription factor TBX15 (T-box protein 15).

[Source:Unprot/SWISSPROT;Acc:Q96SF7]

TTAAAGGCTTCCTAGGGGGAGAAGATGGGCTGGATAACTGTGTTCAATATCATCTCTTTTTTCGTTGCTTGGGTCTCAGTG  
TACTTCTGTTCCACATTTTG

In100 candidate4148 (in intron):

LOCUS ENSG00000116874

DESCRIPTION Tryptophanyl-tRNA synthetase, mitochondrial precursor (EC 6.1.12)  
(Tryptophan--tRNA ligase) (TrpRS) ((Mt)TrpRS).

[Source:Uniprot/SWISSPROTAcc:Q9UGM6]

CCCATCACCTGAGTTCTGTTAGGTTTCTACTCATTAACCAAAATTCATCTGTAGCTTCTTTTTTTCTTGCCACACAGTC  
TTCTGTTTTTTTTCTAGAGC

In100 candidate4149 (in intron):

LOCUS ENSG00000134250

DESCRIPTION Neurogenic locus notch homolog protein 2 precursor (Notch 2) (h2)  
[Contains: Notch 2 extracellular truncation; Notch 2 intracellular domain].

[Source:Uniprot/SWISSPROT;Acc:Q04721]

CATTTTTTGTTTTGTGTTCTGTGAGAGCTCTCTTAAGGTTCTTCTTTATAACACTGACTTATATTTCTTCATTGTCAGGT  
CAGTCCTTTATAGCTTCTTC

In100 candidate4150 (in intron):

LOCUS ENSG00000178104

DESCRIPTION phosphodiesterase 4D interacting protein isoform 3

[Source:RefSeq\_peptide;Acc:NP\_071754]

AATCCAAGCCTCAAGGCATTGCTCTTTCTATCATATCCACCAATCTAACTGTAATGTATTGTTATTCTGTTTTATCAGAT  
TATCTTCCCCTTAGTAGTAT

In100 candidate4151 (in intron):

LOCUS ENSG00000178104

DESCRIPTION phosphodiesterase 4D interacting protein isoform 3

[Source:RefSeq\_peptide;Acc:NP\_071754]

CTGTGTGTTACCACAAAGCCTAACTGGCTTTACTTTGACATTCTTGCATTTTCTCATCTGCCTTAGTTTCTCTGCCAGAA  
TCACATTTTCTTTTGGTGC

In100 candidate4152 (in intron):

LOCUS ENSG00000178104

DESCRIPTION phosphodiesterase 4D interacting protein isoform 3

[Source:RefSeq\_peptide;Acc:NP\_071754]

TTTCTCTGATCAAACAATTTAGGGTAATTTAACCACCCACTCTGTATTATGCTTTCCTGTTTTGCCGCACAGGGCTTGTC  
CATAATATTTTTTGCATTTC

In100 candidate4153 (in intron):

LOCUS ENSG00000121848

DESCRIPTION Zinc finger protein 364 (Rabring 7) (RING finger protein 115).

Source:Uniprot/SWISSPROT;Acc:Q9Y4L5]

CTAACATACCTAATGTCTGCACTGTTTGTTCCTCAGCTGGAGCAGTTCCTCTCCAGGGATATTGCGATGTCTGCCACTTC  
GTCTTTTTCTTTCTCTTTTT

In100 candidate4154 (in intron):

LOCUS ENSG00000178669

DESCRIPTION CDNA FLJ39739 fis, clone SMINT2016440.

[Source:Uniprot/SPTREMBLAcc:Q8N8A9]

CTATCATGAAGTCATTTTCTTCCTAATGAAAAATTTAACTTTTAGATAGTCTTGGCATTCTTCTTTGGTTCTCCAGAT  
TTTCACATCATTTATATTAT

In100 candidate4155 (in intron):

LOCUS ENSG00000163125

DESCRIPTION Uncharacterized protein KIAA0460.

[Source:Uniprot/SWISSPROT;AccQ5VT52]

AGTTTAGGTTATTCCCTAAGTCTTAGGCTAAAATAGCTCTTAACTGTTGTCCTGAGTTGAGTCCTCTATTTTCCAGATTC  
CATGTCTTTTTTTCTTGTT

In100 candidate4156 (in exon):

LOCUS ENSG00000163125

DESCRIPTION Uncharacterized protein KIAA0460.

[Source:Uniprot/SWISSPROT;AccQ5VT52]

TGGTGGTTTTCAACAAAGGTAACTATTAAAGAAAGAAATATTTGTCTTTATCTTCCTTTTCCCCTTGCCTCAGTCGTGT  
TATTCACCCCTATTCTTGAT

In100 candidate4157 (in intron):



LOCUS ENSG00000143374

DESCRIPTION Threonyl-tRNA synthetase, mitochondrial precursor (EC 6.1.1.3)

Threonine--tRNA ligase) (ThrRS) (Threonyl-tRNA synthetase-like 1).

[Source:niprot/SWISSPROT;Acc:Q9BW92]

ATTCAACTTTTAACTTCATGCATAGAGCTTTTTCTCCAGCTGTAATATCTGTTACCTGATATCCTATTTATATTTTCTCT  
GAGTTTGTCTGTCTTTGCCT

In100 candidate4158 (in intron):

LOCUS ENSG00000143398

DESCRIPTION Phosphatidylinositol-4-phosphate 5-kinase type-1 alpha (EC

2.7..68) (Phosphatidylinositol-4-phosphate 5-kinase type I alpha) (PtdIns(4)P- -  
kinase alpha) (PIP5KIalpha) (68 kDa type I phosphatidylinositol-4- phosphae 5-  
kinase alpha). [Source:Uniprot/SWISSPROT;Acc:Q99755]

GACTACCTTTTCTCTCCCTTGAAATTTTCCTGTAACCTAATGTTTCATTTCTTTTGTTTCAGTAAACCAGTCTCAACTCT  
TTTCCTTTTCTCTTTCTGTT

In100 candidate4159 (in intron):

LOCUS ENSG00000143398

DESCRIPTION Phosphatidylinositol-4-phosphate 5-kinase type-1 alpha (EC

2.7..68) (Phosphatidylinositol-4-phosphate 5-kinase type I alpha) (PtdIns(4)P- -

kinase alpha) (PIP5KIalpha) (68 kDa type I phosphatidylinositol-4- phosphae 5-kinase alpha). [Source:Uniprot/SWISSPROT;Acc:Q99755]

AGTGGTATTGTCACATCTATAAAATTAATAATTGTTTAACTTTGCTTCTCAAGGCTCTTTTCTCAGAAATGTCTTTTAT  
GGTTTCTTTTTTTCTAATCA

In100 candidate4160 (in intron):

LOCUS ENSG00000159352

DESCRIPTION 26S proteasome non-ATPase regulatory subunit 4 (26S proteasome  
egulatory subunit S5A) (Rpn10) (Multiubiquitin chain-binding protein)  
(Antiecretory factor 1) (AF) (ASF). [Source:Uniprot/SWISSPROT;Acc:P55036]

GCATTTTCGGATCTCAAGAGTTTCTGATTAAGTGTACTTAACCTATATATTCCTTTTCTGTTAATACTTGTTTTCCAGTA  
CCTTCTTAATTACTTCTCTT

In100 candidate4161 (in intron):

LOCUS ENSG00000143376

DESCRIPTION Sorting nexin-27. [Source:Uniprot/SWISSPROT;Acc:Q96L92]

AATTTATGGATAATGCTTTTTTGTGTTCTAAGAAATCTACCTAACCCAAGGACACCAATCTTTTATGTTTTCTTACAGTT  
TTATAGTTTCAGCTATCTTT

In100 candidate4162 (in intron):

LOCUS ENSG00000159445

DESCRIPTION thioesterase superfamily member 4  
[Source:RefSeq\_peptide;Acc:NP444283]

AGGACAACAAAATATAATCGTTGTCCTAACATTTCTACTTCATTTATAATCTATGCTTTGTCTTTACTTCAGGTATCTC  
TTAGTTTTACCTCCTTGAA

In100 candidate4163 (in intron):

LOCUS ENSG00000163216

DESCRIPTION Small proline-rich protein 2B (SPR-2B).

[Source:Uniprot/SWISSPRT;Acc:P35325]

CTCCCATTCCTTTAGGTTGTCTGTAACTTTCTTGATAGTTTCCTTTGCTATGCAGAAGTTCTTTAGTTTAATTAGATCTC  
ATTTGTCAATTTTCTTTTCT

In100 candidate4164 (in intron):

LOCUS ENSG00000163216

DESCRIPTION Small proline-rich protein 2B (SPR-2B).

[Source:Uniprot/SWISSPRT;Acc:P35325]

AGATGTTAATGCTTGTGATTGCATTATGACATAACAAAAAATGAATTTTGTAGTGTTTTTCAGCTTTTTCAGGTCAGTTA  
TGTTCTTTTCTTTACTGGCT

In100 candidate4165 (in intron):

LOCUS ENSG00000163218

DESCRIPTION Peptidoglycan recognition protein I-beta precursor (Peptidoglycn  
recognition protein intermediate beta) (PGRP-I-beta) (PGLYRPIbeta) (Peptioglycan  
recognition protein 4). [Source:Uniprot/SWISSPROT;Acc:Q96LB8]

TCTGATAGAGGCATTTGATGCTGTAACATTCCATCTTATCACTGTTTTTTGTTGTATCCCAGAGGCTTTGGTATGTTGTG  
TCTCTATTTTCATTTATTTTC

In100 candidate4166 (in intron):

LOCUS ENSG00000143552

DESCRIPTION Nuclear pore membrane glycoprotein 210-like precursor (Nucleopoin  
210 kDa-like). [Source:Uniprot/SWISSPROT;Acc:Q5VU65]

TTTTCAAATAACCTGTCCTCAAGCTCACTGATTCTTTCTTTTGCTTCATCAGTTCTGCTGTTGAGAGACTGATGCATTCT  
TTAGTTTTTTTTTTTTTTTTTTT

In100 candidate4167 (in intron):

LOCUS ENSG00000143549

DESCRIPTION Tropomyosin alpha-3 chain (Tropomyosin-3) (Tropomyosin gamma)  
(TM5). [Source:Uniprot/SWISSPROT;Acc:P06753]

AGTAGTATTCTTGGCTTTGTTTTCTTTAGAGATTATTTGACTTAACTGTGAGCGCCCTTTTATTTATCCCATCAGTTATT  
ACTTTGGCCTCTACTTTTTC

In100 candidate4168 (in intron):

LOCUS ENSG00000163239

DESCRIPTION Tudor domain-containing protein 10.  
[Source:Uniprot/SWISSPROT;Ac:Q5VZ19]

AAATAGTTGTGCTAGATGTTACATTATTACATTATATACACATAACTTATAGCCTACTCTTGTTGGTTTTATCAGTTTGA  
GTACATCTATTTACTTCCCT

In100 candidate4169 (in intron):

LOCUS ENSG00000116580

DESCRIPTION GON-4-like protein (GON-4 homolog).  
[Source:Uniprot/SWISSPROT;Ac:Q3T8J9]

AACCGAATGTCACCTTTTGTTGCCATCTTGGTTGTAAGTGGTTTTGGCTGCTTTCTTTGCTGCATCCTGTTTTGATCAGGG

TTTGTCTTGTTTTGTTCA

In100 candidate4170 (in intron):

LOCUS ENSG00000132680

DESCRIPTION KIAA0907 (KIAA0907), mRNA [Source:RefSeq\_dna;Acc:NM\_014949]

AAAGAAGATACTAACCACCTAACATTTAATGTATATACTCTTTTTTCTTCTTTCTGTTCCATATGATCTGCAGAAATAATG  
TATATACTTTTTTTTTTTTTT

In100 candidate4171 (in intron):

LOCUS ENSG00000163554

DESCRIPTION Spectrin alpha chain, erythrocyte (Erythroid alpha-spectrin).

[Source:Uniprot/SWISSPROT;Acc:P02549]

AATGAATGAGTGCTGGAGTAGGAAAAATAACCTATGTTTTCTTATTTTTCTTTCAGGCCATATTTCCAGTAGTTTCTAAA  
TTTTCTACCTCCATCACTTT

In100 candidate4172 (in intron):

LOCUS ENSG00000163554

DESCRIPTION Spectrin alpha chain, erythrocyte (Erythroid alpha-spectrin).

[Source:Uniprot/SWISSPROT;Acc:P02549]

CAATATCTTAATATAATTTTCTCTTCCTTGGTAACATCTAGATATCTAAGTACTGTCTACTCTTTTCCTTTACAGCATAT  
TTTTCCTTTATAGTATATCT

In100 candidate4173 (in intron):

LOCUS ENSG00000163554

DESCRIPTION Spectrin alpha chain, erythrocyte (Erythroid alpha-spectrin).

[ource:Uniprot/SWISSPROT;Acc:P02549]

TTCTTGTTAGCATCGTTCGTTAGATTTATAGTGAGAAGTAACCTCTTATTCTCAAAATTTCTGTCCCTCATTCTTCAGGT  
AATGGTTTTTTTTTTTTTTTTT

In100 candidate4174 (in intron):

LOCUS ENSG00000163554

DESCRIPTION Spectrin alpha chain, erythrocyte (Erythroid alpha-spectrin).

[ource:Uniprot/SWISSPROT;Acc:P02549]

TAGTGTTCCCAACCCTGAGCAACATTAACATCTTATTTTACTCCATATGATACTTTTGCTTTCAGTTTTGTTTTTTAATT  
GCTATTAGTGCCTATGCTCT

In100 candidate4175 (in intron):

LOCUS ENSG00000162738

DESCRIPTION Vang-like protein 2 (Van Gogh-like protein 2) (Strabismus 1)

(Lop- tail protein 1 homolog). [Source:Uniprot/SWISSPROT;Acc:Q9ULK5]

AGTAACTACTTCGTATATCTTTTAGCCTTTCAGTCCTCTTGGAATTTCTGTTCACCTCCTTTGCCCTTTTTTCTCTAG  
GTTTCCTGTCTTTTTTCTTCT

In100 candidate4176 (in intron):

LOCUS ENSG00000162739

DESCRIPTION SLAM family member 6 precursor (NK-T-B-antigen) (NTB-A)

(Activaing NK receptor). [Source:Uniprot/SWISSPROT;Acc:Q96DU3]

TATCCTCTTTTAACATTTTTTATTGTGTCCATTTGATTCTTCTCTCTTTTCTTCTTTGTTAGTCTAGCTAACTAGCAGTC

TATCTATATTATTAGTTTTT

In100 candidate4177 (in intron):

LOCUS ENSG00000118217

DESCRIPTION Cyclic AMP-dependent transcription factor ATF-6 alpha (Activating transcription factor 6 alpha) (ATF6-alpha). [Source:Uniprot/SWISSPROT;AccP18850]

AGATTGTATGTTGGCTGATTTTCTCTCTCCTTTAACTCCACCCAATCCTTGTCTCTGGTATTTCTCCTATCAGACTTTTTT  
TTTTTTTTTCCAAAGAATAT

In100 candidate4178 (in intron):

LOCUS ENSG00000198929

DESCRIPTION Carboxyl-terminal PDZ ligand of neuronal nitric oxide synthase protein (C-terminal PDZ ligand of neuronal nitric oxide synthase protein) (nitric oxide synthase 1 adaptor protein). [Source:Uniprot/SWISSPROT;Acc:O7502]

CATCATGGAATCTGAAGAGGTTAACAACACTATGGTGGACATCTAAACCAATCCTCCTATTTTTTTTTTTTTTCAGTTTAT  
CCTTTATTACAGTATACCTC

In100 candidate4179 (in intron):

LOCUS ENSG00000143228

DESCRIPTION Kinetochore protein Nuf2 (hNuf2) (hNuf2R) (hsNuf2) (Cell division cycle-associated protein 1). [Source:Uniprot/SWISSPROT;Acc:Q9BZD4]

TTGGGGTAGGTAATAACATCTTCTCTATCATTTCTGTCATTAATAATTTGTTTATTCTTTTTTTTTTCCTAACCAGTCTGG  
TTATCAGCTTATCACTTTTC

In100 candidate4180 (in intron):

LOCUS ENSG00000185630

DESCRIPTION Pre-B-cell leukemia transcription factor 1 (Homeobox protein PB1)  
(Homeobox protein PRL). [Source:Uniprot/SWISSPROT;Acc:P40424]

CCATATTCCACTAACTTCTACATGTGTGGATCTCCTTTCAGCAGGCTCTATCTTTACCTCCAAAGTGCTTCCGCATCTCT  
TGTCCCATTTTCTTTTTTTT

In100 candidate4181 (in intron):

LOCUS ENSG00000143183

DESCRIPTION Transmembrane and coiled-coil domain-containing protein 1  
(Xenoeneic cross-immune protein PCIA3). [Source:Uniprot/SWISSPROT;Acc:Q9UM00]

TTCTTTCAAATTTTTTCATTTTTTTTGATAATTTGTGTGAGATTTAACATCTTTTCATATACTTACTATGTTTTTCCAGTT  
TTAAGTTCCTAGTTCATTCC

In100 candidate4182 (in intron):

LOCUS ENSG00000143179

DESCRIPTION Uridine-cytidine kinase 2 (EC 2.7.1.48) (UCK 2) (Uridine  
monophosphokinase 2) (Cytidine monophosphokinase 2).

[Source:Uniprot/SWISSPROT;AccQ9BZX2]

CTTTGCCAACTCGCTATTGGCAATACTCTTTCCATAACATGGGTTTCTTTCTTTCTTTTTTTGTTTTTTTTTAAAGCAGTT  
GTTTTTACTTGGTTTCTCCC

In100 candidate4183 (in intron):

LOCUS ENSG00000143190



DESCRIPTION POU domain, class 2, transcription factor 1 (Octamer-binding  
transcription factor 1) (Oct-1) (OTF-1) (NF-A1).

[Source:Uniprot/SWISSPROT;AccP14859]

GTCTTCACTGTCACCTGGTGCTAACCTTGGATTACCTCTAATTTATTCCCTGTCACATTTTTCATTGCATATTTCCAGTC  
TTCTCTATTTCTGTTTTGCT

In100 candidate4184 (in intron):

LOCUS ENSG00000143199

DESCRIPTION soluble adenylyl cyclase [Source:RefSeq\_peptide;Acc:NP\_060887]

EXON

TGGTTCACCTTCTTGGTGTTCACACAAGTCCCTTAGGCTCTGTAACTTTTCTTCAATCTTTTTTCTTTCTGTTTCATCAGAC  
TCAATAATTTCCATTGTCTT

In100 candidate4185 (in intron):

LOCUS ENSG00000143164

DESCRIPTION IQ motif and WD repeats 1 isoform a

[Source:RefSeq\_peptide;Acc:P\_060912]

TTTCTTTTGGCCTTAACATGCTCTTATTATCTCCTTTCTTTAAAAATTTCTCTTAATTATCTCACATTTCCCTTCAGCT  
ATTGCCTTATTTCTCTGCTG

In100 candidate4186 (in intron):

LOCUS ENSG00000143147

DESCRIPTION Probable G-protein coupled receptor 161 (G-protein coupled  
recetor RE2). [Source:Uniprot/SWISSPROT;Acc:Q8N6U8]

TAGTGAAGCTGGGCTTTGTAAGTCTTACCTGATTATTTTGCTGCCCTGTTTGTCTTCCTTCTTTCCCTTTTTCAGCAGTT  
CTACTCTGTGCTTCAACTTT

In100 candidate4187 (in intron):

LOCUS ENSG00000143155

DESCRIPTION TIP41, TOR signalling pathway regulator-like isoform 1  
[Source:efSeq\_peptide;Acc:NP\_690866]

GTTTTCATAGGCTTTACTTCTTTGCTCACTTATAACTCTAAATTCAGTTTTTTTTTTGTTTAGATTTATTCTCTCTTCAGTT  
CACCTAGTCTTGTATCTTTC

In100 candidate4188 (in intron):

LOCUS ENSG00000143153

DESCRIPTION Sodium/potassium-transporting ATPase subunit beta-1  
(Sodium/potssium- dependent ATPase beta-1 subunit).  
[Source:Uniprot/SWISSPROT;Acc:P0506]

AGTAACTGATAGCCACCCTCATTCATCTATGTGTTGAGTCTTTTTTTTTTTTTTTTTTTGCTTTTGCAGCTATTTTCAG  
CCTCCATCCTGTTGTCTTGT

In100 candidate4189 (in intron):

LOCUS ENSG00000143153

DESCRIPTION Sodium/potassium-transporting ATPase subunit beta-1  
(Sodium/potssium- dependent ATPase beta-1 subunit).  
[Source:Uniprot/SWISSPROT;Acc:P0506]

AACTCTGTTTACCATTGCTGTCTCAAGCATTAAGTATCTGTGGAAGCTTCTGCTCACCTTTATTTTTGCAGGTATCTCTT  
CTCTTTACAATACTGCTGTT

In100 candidate4190 (in intron):

LOCUS ENSG00000143156

DESCRIPTION Nucleoside diphosphate kinase 7 (EC 2.7.4.6) (NDK 7) (NDP kinas  
7) (nm23-H7). [Source:Uniprot/SWISSPROT;Acc:Q9Y5B8]

ACTATAGCTGCACTGGCTTTCTTTTAGTTAACATTTCGCATGGTATACCTTTTCCATTCTTTTTACTTTAGATTTTCAGTA  
TTCTCTTCTATGTGTGCCTT

In100 candidate4191 (in intron):

LOCUS ENSG00000143156

DESCRIPTION Nucleoside diphosphate kinase 7 (EC 2.7.4.6) (NDK 7) (NDP kinas  
7) (nm23-H7). [Source:Uniprot/SWISSPROT;Acc:Q9Y5B8]

AACTGCTCTTTGGCTGCATTCACTATTTTCTTTTTTTTAAACAAGTGATACTGTTTTCTTTAAGATCTCAGCTTAACAT  
TTTACCTCTTTTATTTCTTT

In100 candidate4192 (in exon):

LOCUS ENSG00000117479

DESCRIPTION Thiamine transporter 1 (ThTr-1) (ThTr1) (Thiamine carrier 1) (T1)  
(Solute carrier family 19 member 2). [Source:Uniprot/SWISSPROT;Acc:O6077]

CTAGTTAACCTTTTGTTATCTTTTAAATTATTCATTGCTTTGTGATTTTACCTTTGACTCTTCCCCCTTATTTTCAGAT  
GTTTTCCCCCTTTTTTTTGG

In100 candidate4193 (in intron):

LOCUS ENSG00000117501

DESCRIPTION CDNA: FLJ23550 fis, clone LNG08970.

[Source:Uniprot/SPTREMBL;Ac:Q9H5D7]

AAAGGTATGTCACCTTTTGTTTAACTTTTAAAAAAGCCAACCTTTTGTTTCACTTATCATTTGTATTGTTGTTTTCAGTT  
CAATTCCATTTATTTCTGCT

In100 candidate4194 (in intron):

LOCUS ENSG00000117523

DESCRIPTION HBxAg transactivated protein 2

[Source:RefSeq\_peptide;Acc:NP\_05987]

TGAGTACCAAAGGAATTTGAGAGACCATAGCTAATCTCTTTAACAAATGTGGAAACCACTTAGACTTTTTTCTTCCAGAT  
TTTCTCTTCTTTTAAATTGT

In100 candidate4195 (in intron):

LOCUS ENSG00000197959

DESCRIPTION Dynamin-3 (EC 3.6.5.5) (Dynamin, testicular) (T-dynamin).

[Source:Uniprot/SWISSPROT;Acc:Q9UQ16]

CATAGAATAAGTTAGTAACTCTCCCTCTGCTTCTCTTTTACTTTCTTCTATTAGCTTTTGCAATTCTTAAAAGCCCAGGG  
ATGCATTTTAGTCTCTCTTT

In100 candidate4196 (in intron):

LOCUS ENSG00000197959

DESCRIPTION Dynamin-3 (EC 3.6.5.5) (Dynamin, testicular) (T-dynamin).

[Source:Uniprot/SWISSPROT;Acc:Q9UQ16]

ATACATTTATATTGTCTATTATATTTAACTATGTAGTTAACTTTACTGGTGTTCTTCAGTTTTTCCTGGGTATTTGAGTT  
ACTGTCCAGTGTCTTTTTTT

In100 candidate4197 (in intron):

LOCUS ENSG00000197959

DESCRIPTION Dynamin-3 (EC 3.6.5.5) (Dynamin, testicular) (T-dynamin).

[Source:Uniprot/SWISSPROT;Acc:Q9UQ16]

GCAATATTGAGTCTTTCTACTTGTTAACATGTAAATAGCTCTTCATTTATTTAGTTCTTCTTTAATATCTTTCATCAGAG  
TTTTGTAGTTTTTCCTCATAC

In100 candidate4198 (in intron):

LOCUS ENSG00000197959

DESCRIPTION Dynamin-3 (EC 3.6.5.5) (Dynamin, testicular) (T-dynamin).

[Source:Uniprot/SWISSPROT;Acc:Q9UQ16]

TTGCTGGATCTATCCATTTCTGATAGAGGAGTGTTAAATTCTGTAAGTGTAAATAGTGGATCCATCCGTTTCTTTGCAGTT  
CTTTCTGTTTCTCCTCAGGT

In100 candidate4199 (in intron):

LOCUS ENSG00000197959

DESCRIPTION Dynamin-3 (EC 3.6.5.5) (Dynamin, testicular) (T-dynamin).

[Source:Uniprot/SWISSPROT;Acc:Q9UQ16]

TAAGATAATTTAATCTTTTGTCTGTAACTATATGTCGTCTCATTTCTAATTTGTTTTCTCATCTTTTATATTACAGAA  
TTCTGTTTTATTGTCTGATT

In100 candidate4200 (in intron):

LOCUS ENSG00000135845

DESCRIPTION Phosphatidylinositol N-acetylglucosaminyltransferase subunit C EC  
2.4.1.198) (Phosphatidylinositol-glycan biosynthesis class C protein) (PG-C).

[Source:Uniprot/SWISSPROT;Acc:Q92535]

TAACCCCATAGGAAAGAATTGGAAGTTTCATTTATTTTTTTCCTACCTTTAGTTCTCTTTTTTCCATCTTTCAGATCTT  
TAGATGTTCTGAGTTTTTCT

In100 candidate4201 (in intron):

LOCUS ENSG00000180999

DESCRIPTION Uncharacterized protein Clorf105.

[Source:Uniprot/SWISSPROT;Acc:O95561]

TTTAACTACCAATGCCCAATTCATTCTCCCTTATTTCTTGATGATTTTAGCTCCTGTTTCAATGTCACCTCCCTCCAGTG  
ATACTCCTGTTTTAATTCTT

In100 candidate4202 (in intron):

LOCUS ENSG00000152061

DESCRIPTION RAB GTPase activating protein 1-like.

[Source:Uniprot/SPTREMBL;cc:Q5VTT7]

AGTATGGACATTTCAACAATATTTTTCCAATCCATGAACATGAGATAACTTTCCATCTATTTGTGTCATTTTCAGTTTCC  
TTCATCAATGTCTTACAGTT

In100 candidate4203 (in intron):

LOCUS ENSG00000152061

DESCRIPTION RAB GTPase activating protein 1-like.

[Source:Uniprot/SPTREMBL;cc:Q5VTT7]

TGTTTGGAATCTATGGGTCTCATAACTTTGACTGTCCTCTTCTTTTCCTAAATTTGGGATCTTTTCAGCCATTATTTCT  
TTATATAGATTTTTCAGTCT

In100 candidate4204 (in intron):

LOCUS ENSG00000152061

DESCRIPTION RAB GTPase activating protein 1-like.

[Source:Uniprot/SPTREMBL;cc:Q5VTT7]

AGTTGCGCATAGTAACCACTGATGATCCTTTGAATTTCTGCCATCTCAGTGATAATGTCTCTGTTTTCTTTCTGATCTT  
ATTTATCTGTATCTTTTTTGC

In100 candidate4205 (in intron):

LOCUS ENSG00000152061

DESCRIPTION RAB GTPase activating protein 1-like.

[Source:Uniprot/SPTREMBL;cc:Q5VTT7]

TGTTTGTCAATTTTGTTTAACTTTTAAAAAACAATTTTTTGTTTCATTGATCTTTTATTCTGTTTTCTTCATTTTCAGTT  
TCATTTATTTCTGCTCTGAT

In100 candidate4206 (in intron):

LOCUS ENSG00000152061

DESCRIPTION RAB GTPase activating protein 1-like.

[Source:Uniprot/SPTREMBL;cc:Q5VTT7]

TCTTTGCGGGGTTGGAGTTTTCATATTGTGACTTTTGGGCTAACATCTCTCTAGCTCTTCTTATTAGTTAATTTTCAGCA  
GATTTTTTTTTTCTATATTG

In100 candidate4207 (in intron):

LOCUS ENSG00000152061

DESCRIPTION RAB GTPase activating protein 1-like.

[Source:Uniprot/SPTREMBL;cc:Q5VTT7]

AGATTGGCTAACTGTTACCAAATCTATTTTCTTTTCTTTCTGCTGACACAGCTGGACTATATTTCCCAGCCTCCTCTGG  
CTTCTAAAATTATTTTCTTT

In100 candidate4208 (in intron):

LOCUS ENSG00000116147

DESCRIPTION Tenascin-R precursor (TN-R) (Restrictin) (Janusin).

[Source:Unirot/SWISSPROT;Acc:Q92752]

TCCTACTTTATTTTTATTTAACCAATTTCTCCAAATTTTCATGATTTTATTTTGCTCTATAGTTTATCTTTTTATCAGCA  
CTTTGAGTTCTTTTATTATC

In100 candidate4209 (in intron):

LOCUS ENSG00000143207

DESCRIPTION E3 ubiquitin-protein ligase RFWD2 (EC 6.3.2.-) (RING finger andWD  
repeat domain protein 2) (Constitutive photomorphogenesis protein 1 homoog)  
(hCOP1) (RING finger protein 200). [Source:Uniprot/SWISSPROT;Acc:Q8NHY2]



CGTTTTTCTCTCTAACTGCTTTTAAGATTTTCTTTCTGACATTGGTTTTTCAGCAATTTGACTATGTTATTCCTACATTTT  
ATTATTTTTTATATTTATTCT

In100 candidate4210 (in intron):

LOCUS ENSG00000143207

DESCRIPTION E3 ubiquitin-protein ligase RFW2 (EC 6.3.2.-) (RING finger andWD  
repeat domain protein 2) (Constitutive photomorphogenesis protein 1 homoog)  
(hCOP1) (RING finger protein 200). [Source:Uniprot/SWISSPROT;Acc:Q8NH2

AGATTGTCTAAGCACTTAACATTTTATCACATTTGTTTTATCATTCTCATTTCAGCCTTTCTTTTACCTATATATGCGTAT  
AATTTCTTTTCTGGATTGTT

In100 candidate4211 (in intron):

LOCUS ENSG00000116183

DESCRIPTION Pappalysin-2 precursor (EC 3.4.24.-) (Pregnancy-associated plasa  
protein-A2) (PAPP-A2) (Pregnancy-associated plasma protein-E1) (PAPPE).[  
Source:Uniprot/SWISSPROT;Acc:Q9BXP8]

GTCTCATGATTGCTTTTAGAGAGGAGGGGAGAAATGGAACGTATAACCTTTCTCCGTTTCTTTTTTGTCTCTCAGTT  
TTCTTCAGTCTCTTTCTTCA

In100 candidate4212 (in intron):

LOCUS ENSG00000116183

DESCRIPTION Pappalysin-2 precursor (EC 3.4.24.-) (Pregnancy-associated plasma protein-A2) (PAPP-A2) (Pregnancy-associated plasma protein-E1) (PAPPE).[

Source:Uniprot/SWISSPROT;Acc:Q9BXP8]

TTTTCTTTTTTAACTCTAGCTAATGGCTTGTCCATTTTGTATATCTTTTCAGAAAACCAAGTTTTTGTTCATTGAACTT  
TCTTAGTCTCTCTTTTGTTT

In100 candidate4213 (in intron):

LOCUS ENSG00000116183

DESCRIPTION Pappalysin-2 precursor (EC 3.4.24.-) (Pregnancy-associated plasma protein-A2) (PAPP-A2) (Pregnancy-associated plasma protein-E1) (PAPPE).[

Source:Uniprot/SWISSPROT;Acc:Q9BXP8]

GAGTTTCATTCTTTCCCTTCTCTCATTTTCCCCCTCACACCCAATAACCAACTCTCTTTTATCTTTCTCTTCCAGCT  
CTCCTCTTCCTGTTAGTTCT

In100 candidate4214 (in intron):

LOCUS ENSG00000075391

DESCRIPTION Ras GTPase-activating protein nGAP (RAS protein activator-like ).

[Source:Uniprot/SWISSPROT;Acc:Q9UJF2]

TTCTAAGGTTTGGAGGATGTGTACCATAACTGATTTGTATGTCATTTTGTGTTTGGATTACCTTTTACAATTCAGAA  
TTTTTTTTTTTTTTTTTTTTT

In100 candidate4215 (in intron):

LOCUS ENSG00000075391

DESCRIPTION Ras GTPase-activating protein nGAP (RAS protein activator-like ).

[Source:Uniprot/SWISSPROT;Acc:Q9UJF2]

AGTAACTATATAAATGTGTGTCTTTTCCAGTCTCTCTATTCTGTTTCATTGCTTTTCTGTTCTTTGTAGATACTATG

CTCTCTTGATTACTGTAGCT

In100 candidate4216 (in intron):

LOCUS ENSG00000116191

DESCRIPTION Ral GEF with PH domain and SH3 binding motif 2 isoform 2

[Source:RefSeq\_peptide;Acc:NP\_689876]

ATTCTTTCCTGCTTGTCTCTTAACCTTACATATTTTCTCTCTGTTTTTGTCTCCATTCTGAGTGATTTCCTCAGATCTA

CATTTCAGTTCACTGATTCT

In100 candidate4217 (in intron):

LOCUS ENSG00000057252

DESCRIPTION Sterol O-acyltransferase 1 (EC 2.3.1.26) (Cholesterol  
acyltransferase 1) (Acyl coenzyme A:cholesterol acyltransferase 1) (ACAT-1).

[Source:niprot/SWISSPROT;Acc:P35610]

AACATATTGATCATTCTGATTTTTTTGTCTAAAGTAACAATCCATTATCTTTAGTTTTTCAGATCTGCATCTCTTGG

CTTTTGTTTCTGCTGTTTCC

In100 candidate4218 (in intron):

LOCUS ENSG00000057252

DESCRIPTION Sterol O-acyltransferase 1 (EC 2.3.1.26) (Cholesterol  
acyltransferase 1) (Acyl coenzyme A:cholesterol acyltransferase 1) (ACAT-1).

[Source:niprot/SWISSPROT;Acc:P35610]

GTTTTTCCTTTTGTTTAGTTTTCTTCACATTTAACTCTCCTAGCTTTTGGTTTTCTTCTTTTACTGCCTTTTCTTCAGCC  
CCTTCTAATTTTTTTTTTTTTT

In100 candidate4219 (in intron):

LOCUS ENSG00000162779

DESCRIPTION CDNA FLJ32940 fis, clone TESTI2007750.

[Source:Uniprot/SPTREMBLAcc:Q96M01]

CTCCCTCTCTGTGGGTTGTCTGTTTAACCTGCTGATTATTTCTTTTGTGTGCAGAAGTTCTTTAGTTTAATTAGGTCCC  
ATCTATTTATTTTTGTTTTT

In100 candidate4220 (in intron):

LOCUS ENSG00000143340

DESCRIPTION

TGAGTTCCTGCGTTGGCCATTCATAACTGATTTACATTTTATTATTCTTCCTTTCTCTGCCTATAGATCCTATGACAGGA  
GTCTTTCTCTATTATTATTA

In100 candidate4221 (in intron):

LOCUS ENSG00000135847

DESCRIPTION Acyl-CoA-binding domain-containing protein 6.

[Source:Uniprot/SISSPROT;Acc:Q9BR61]

ACTGTTGCCCCATAGTGGCTGTACTAATTTACATTCTCACTAACCATGTATAAGAGTTTTTCTCTGCATCCTTGCCAGCA  
TCTGTTAATTTTAAATCTTT

In100 candidate4222 (in intron):

LOCUS ENSG00000135847

DESCRIPTION Acyl-CoA-binding domain-containing protein 6.

[Source:Uniprot/SISSPROT;Acc:Q9BR61]

AGTATTCTTCTAACTCATGAGCATGGCATGTCTTTCTATTTTTTTGTGAATTTCTTTTGTTCAGTTTTGTAGTTTTCCTTA  
TAGAGATCTTTCACCTCCTT

In100 candidate4223 (in intron):

LOCUS ENSG00000135847

DESCRIPTION Acyl-CoA-binding domain-containing protein 6.

[Source:Uniprot/SISSPROT;Acc:Q9BR61]

TGTAGTTTAGTGGTATTCTGTAGTGGTAACATTTGAGGTTTTTCTCTTTCTTGATTTGTGTGTTTGCTCCACCAGTGGTT  
TTTATATTTTCACGTGTCTT

In100 candidate4224 (in intron):

LOCUS ENSG00000135847

DESCRIPTION Acyl-CoA-binding domain-containing protein 6.

[Source:Uniprot/SISSPROT;Acc:Q9BR61]

CATAGCTTCAATTTTAAGCATGCTTGAATTTTTTTACATTTTAACTCTATTATGTAATTTTGTTATTTTAAATTCAGTT  
GGGTATTTTATTTTACCCT

In100 candidate4225 (in intron):

LOCUS ENSG00000143324

DESCRIPTION xenotropic and polytropic retrovirus receptor

[Source:RefSeq\_petide;Acc:NP\_004727]

GTATTATATAACATTTACTACTCCCTTCTTTCTTCCTTTTTTTCATTTTCTCTTTTTGTAAATTTCCCTTCTTCCCAGTT  
TTTTTTTTTAAATTTTCATGT

In100 candidate4226 (in intron):

LOCUS ENSG00000143324

DESCRIPTION xenotropic and polytropic retrovirus receptor

[Source:RefSeq\_petide;Acc:NP\_004727]

AGCATCCATGCTGTTTTCTAACTATAGTTATTCCTGCTTTTTTTCCTCCTTTACTTCCTTTCTTAGTTATCCATTCAGCT  
CATTCCTTTCACCTGCTAATT

In100 candidate4227 (in intron):

LOCUS ENSG00000198216

DESCRIPTION Voltage-dependent R-type calcium channel subunit alpha-1E

(Voltage- gated calcium channel subunit alpha Cav2.3) (Calcium channel, L type,  
alpha-1 polypeptide, isoform 6) (Brain calcium channel II) (BII).

[Source:Unirot/SWISSPROT;Acc:Q15878]

AAACAAACTTCCTTTAATTCCTTGAATTCATTCTTAACATCTCTGTTCTTCCTAATGCTTGTTTCTCAGCTCTACTTCCA  
GGATTGGTTCATCTATTTTT

In100 candidate4228 (in intron):

LOCUS ENSG00000121446

DESCRIPTION Regulator of G protein signaling protein (Regulator of G-protei

signalling like 1). [Source:Uniprot/SPTREMBL;Acc:Q86UV0]

AGTCATGAGCATGGAGTAACCTTTCATTTGTGTATATCTTCTTTTTTGTTCCTTTCATCAGCGTTTTGTAATTTTCTTG  
TATAGATCTTTCACCTTCTTT

In100 candidate4229 (in intron):

LOCUS ENSG00000135862

DESCRIPTION Laminin subunit gamma-1 precursor (Laminin B2 chain).

[Source:Uiprot/SWISSPROT;Acc:P11047]

AACCCATAAACACTTTCTACATAACCCACTTTTGCACACTTTGCTCTCTTTTCTAAGATATTATCAGCTGTGTATACTCT  
TTTCTTCCTTTTACTTTGAC

In100 candidate4230 (in intron):

LOCUS ENSG00000058085

DESCRIPTION Laminin subunit gamma-2 precursor (Laminin 5 gamma 2 subunit)  
(alinin/nicein/epiligrin 100 kDa subunit) (Laminin B2t chain) (Cell- scatterng  
factor 140 kDa subunit) (CSF 140 kDa subunit) (Large adhesive scatter fator 140  
kDa subunit) (Ladsin 140 kDa su [Source:Uniprot/SWISSPROT;Acc:Q1375]

CAAATGTAGAGCAAACCTCAACTTGTTTTTCAAACCTGATCTATTTAACAAGCCTTTTACGCACTTCCTTTGTGTCAGGCAC  
TGTTCTCTTGTCTCTAGCTT

In100 candidate4231 (in intron):

LOCUS ENSG00000116698

DESCRIPTION Protein SMG7 (SMG-7 homolog) (EST1-like protein C).

[Source:Unirot/SWISSPROT;Acc:Q92540]

AGAATCCCTTCCTTTAACTGTACTCTTTAATGTTTACCATCCTTCAGGATCTTTTTTCACTTGTGTCGCTCTCTCTTTT  
AAATTATTCCCTTTACCGAT

In100 candidate4232 (in intron):

LOCUS ENSG00000116698

DESCRIPTION Protein SMG7 (SMG-7 homolog) (EST1-like protein C).

[Source:Unirot/SWISSPROT;Acc:Q92540]

GCCAAGCGTTTCAAGTTTGCCCTAACCTATGTTTTTCCTTTAGTTACCATCTACTTTTCCTTAATCCCTTGCTATCAGTC  
CATTTTTTTCTGAGTACATT

In100 candidate4233 (in intron):

LOCUS ENSG00000116698

DESCRIPTION Protein SMG7 (SMG-7 homolog) (EST1-like protein C).

[Source:Unirot/SWISSPROT;Acc:Q92540]

CTGTTATAACTGCTATATTGCATTAATATTCTCATCTGTTTCCCAAACCTCTTTGGGTCTTTTCTCAGATCGCAGAAGT  
TGAGTTCTTTTTCTTTCCTT

In100 candidate4234 (in intron):

LOCUS ENSG00000143344

DESCRIPTION Ral guanine nucleotide dissociation stimulator-like 1 (RalGDS-like  
1). [Source:Uniprot/SWISSPROT;Acc:Q9NZL6]

AAAGTTTAACTGCCAAAGGCACTTCTTTCCTATAGTTCTGACAACTTCTCCTTTTGTTATATACCACTGATATCCAGGT  
TCAGTTCATCATCTATTTCA

In100 candidate4235 (in intron):

LOCUS ENSG00000198756

DESCRIPTION glycosyltransferase 25 domain containing 2

[Source:RefSeq\_peptie;Acc:NP\_055916]

TTCCCCATTTGTACCATCTTTAACTGAAAGTGGTATGTTAATATCTCTTATTATTGTTATTTCTGTTTTTCTTTACAGTT



TCTATACTTTCTACTATATT

In100 candidate4236 (in intron):

LOCUS ENSG00000116667

DESCRIPTION Uncharacterized protein Clorf21 (Proliferation-inducing gene 13protein). [Source:Uniprot/SWISSPROT;Acc:Q9H246]

GTTACCTTGTTTCTCCCGTTTCTTATTTAACTATGCTATATCTTTTACTTCTCTTTCTCCATTAATAATTCCCACAGCC  
CTTTTCTTAACTTTTCCTA

In100 candidate4237 (in intron):

LOCUS ENSG00000116667

DESCRIPTION Uncharacterized protein Clorf21 (Proliferation-inducing gene 13protein). [Source:Uniprot/SWISSPROT;Acc:Q9H246]

TGGCTTTGGTGTTAACTTCTGGAAAATCGACTGTCTTTCATTTGTTTCCTTTCTTCTTAGAGACTCCCATTTGCTTGCAGGT  
TACATCTCTACACTCTATTT

In100 candidate4238 (in intron):

LOCUS ENSG00000116406

DESCRIPTION ER degradation-enhancing alpha-mannosidase-like 3.  
[Source:Unipot/SWISSPROT;Acc:Q9BZQ6]

TAAAATTTGTTGATAACCTCATTTATGTTCAATTCAAATTTCACTTCGTGTTGTCACCTTTTATTTCTTTGCCAGACTCT  
CATGTTTGTGGCTAATTCT

In100 candidate4239 (in intron):

LOCUS ENSG00000135842

DESCRIPTION Niban protein. [Source:Uniprot/SWISSPROT;Acc:Q9BZQ8]

AAGCCATAAGATATGTCTCCTGACCCATGACAACTTTAGTGACTAACCCACTTACTCACACATTTTCATGTTTCAGCATTT  
CCTCCCTTCGGTATCATTAT

In100 candidate4240 (in intron):

LOCUS ENSG00000135842

DESCRIPTION Niban protein. [Source:Uniprot/SWISSPROT;Acc:Q9BZQ8]

TTTCACTGCATTTAACACTAACTGAGGTTTCATTTTGAATCAAATGTTGGTGTTTTTCCTCTTTTCACTTATTTTCAGCTT  
GCTCTCTCAGCTTGCAGTTT

In100 candidate4241 (in intron):

LOCUS ENSG00000135842

DESCRIPTION Niban protein. [Source:Uniprot/SWISSPROT;Acc:Q9BZQ8]

AGCCTACTTGTTAACTTTTAATTTTATATTTTCTATCTTTTTTCTCTCTTTTTTTTTTCCCTGAACAGTTTCTGTGCTCTG  
TCATTCAGTTCTCTACTTCT

In100 candidate4242 (in intron):

LOCUS ENSG00000121486

DESCRIPTION N2,N2-dimethylguanosine tRNA methyltransferase-like

[Source:Refseq\_peptide;Acc:NP\_112196]

AGACTACATTTAATATCTTCCATATCTGATCCTAACCTGCTTGTCCAAATTTATTTCTCAGTATTCTTCACCATACACCG  
TTTTTCTTTACTCTTTTGAG

In100 candidate4243 (in intron):

LOCUS ENSG00000143341

DESCRIPTION Hemicentin-1 precursor (Fibulin-6) (FIBL-6).

[Source:Uniprot/SWSSPROT;Acc:Q96RW7]

GTTTTCTTCTCTTGTTCTTTTCTAACTTTAAAATTTAAATGTTTCTTTTACCTTTCTAATGCAGATATTTGAAACCTTT  
TAACTTCGTCATTTATTTTC

In100 candidate4244 (in intron):

LOCUS ENSG00000143341

DESCRIPTION Hemicentin-1 precursor (Fibulin-6) (FIBL-6).

[Source:Uniprot/SWSSPROT;Acc:Q96RW7]

AGAGAGGATCTCTCACTCAATAACTGGACAAGGTTTATCATTCCTTCTATTCCCTAATATGTGCCTTCAGATATTTCTTAG  
CTGTCCTCATGTTTGGCCCA

In100 candidate4245 (in intron):

LOCUS ENSG00000162670

DESCRIPTION Protein FAM5C precursor (DBCCR1-like protein 1).

[Source:Unipro/SWISSPROT;Acc:Q76B58]

AGTTGTTCAACAATAGTCTCTAACGATTCTTTGTGCTTCTGGGTCTCAGTTGTTATGTCTCCTTTTTTCATTTCTGATTTT  
ATTTAATTAGGTCTTTTTTT

In100 candidate4246 (in intron):

LOCUS ENSG00000116747

DESCRIPTION 60 kDa SS-A/Ro ribonucleoprotein (60 kDa Ro protein) (60 kDa rionucleoprotein Ro) (RoRNP) (Ro 60 kDa autoantigen) (TROVE domain family member 2) (Sjogren syndrome type A antigen) (SS-A) (Sjogren syndrome antigen 2).

[Source:Uniprot/SWISSPROT;Acc:P10155]

AGCACCTAACATGTAGTAGAAGTACACTTTGGTTCTCTATTTCTCCCTTCCACACATATTTTTATATACAGAATCTCTTC  
AGTAATTCCTGACTTATTTT

In100 candidate4247 (in intron):

LOCUS ENSG00000162687

DESCRIPTION potassium channel, subfamily T, member 2

[Source:RefSeq\_peptideAcc:NP\_940905]

ATTACATTTTAACATTATTCTGTGTTTTCTGTGTACTTACTATTTCCAGTGAGTTTTATACCTTCAGATGATCTTTTCTT  
GCTTATTAACATCCTTTTCCT

In100 candidate4248 (in intron):

LOCUS ENSG00000162687

DESCRIPTION potassium channel, subfamily T, member 2

[Source:RefSeq\_peptideAcc:NP\_940905]

AAATGTCTCACCATATTTATTTATGTTGCTAACACTACTCTGAACGTGTTTTATTCCTTAATGTTCCACCAGCGTTTTCT  
GTAGTTGACTTGTATCCTTC

In100 candidate4249 (in intron):

LOCUS ENSG00000162687

DESCRIPTION potassium channel, subfamily T, member 2

[Source:RefSeq\_peptideAcc:NP\_940905]

GTAACAAAGCCTGTTTTGCAATATTAATTTATGATTCATTTTCCATTTTATTTCCATATCTCTTTTCGCCAGATGCTAAAC  
CTTGTATTTGCTTTTCTGTT

In100 candidate4250 (in intron):

LOCUS ENSG00000066279

DESCRIPTION Abnormal spindle-like microcephaly-associated protein  
(Abnormalspindle protein homolog) (Asp homolog).

[Source:Uniprot/SWISSPROT;Acc:Q8IZT]

AGTTAGGAAACTACCACCACTGAGATACAAAATATTTCTGTAACACAAAGTTTCCTTATGCCCCTTTGTTGTCAGTTCTC  
TTTCTTTATTCCCTGGATTT

In100 candidate4251 (in intron):

LOCUS ENSG00000134376

DESCRIPTION Crumbs homolog 1 precursor. [Source:Uniprot/SWISSPROT;Acc:P8227]

ACTACTTCCTAAGGTCTAACCTCTGAAAAAGGTTGGACCTTTCTCTTGAAATTCTCATAGGTTCTTTTCTTCTCTCAGAA  
ATAAATCTCTACTCTTTCTT

In100 candidate4252 (in intron):

LOCUS ENSG00000162701

DESCRIPTION DENN/MADD domain containing 1B

[Source:RefSeq\_peptide;Acc:NP\_65414]

AGAAAGATTTATTTTGCTTACTGTAACGAACTAACTTATTTCTTGAGATCTCCTCAGACATTAAGTTCTATGATTTTG  
TGTCTTGGTCCTTCTACCTC

In100 candidate4253 (in intron):

LOCUS ENSG00000151414

DESCRIPTION Serine/threonine-protein kinase Nek7 (EC 2.7.11.1) (NimA-relate  
protein kinase 7). [Source:Uniprot/SWISSPROT;Acc:Q8TDX7]

GACAAAATTACTCTGCTTTATGAAGAGAACTATGGGGTTAACATTAAAGTAGGATTAGGTCTTCTAATTCTTTTCCAGTT  
CTGTGGTTTTATTATTTTAT

In100 candidate4254 (in intron):

LOCUS ENSG00000151418

DESCRIPTION Vacuolar ATP synthase subunit G 3 (EC 3.6.3.14) (V-ATPase G  
subnit 3) (Vacuolar proton pump G subunit 3) (V-ATPase 13 kDa subunit 3).

[Souce:Uniprot/SWISSPROT;Acc:Q96LB4]

ACCTGGTCGTGCTACTATCTTTCTAATACCATCTCCTAACATTCATGATTGAATATCCTGTTCTCTTTGCTCCAGCCATG  
ATGGTGTTTTTGCTCTTCCT

In100 candidate4255 (in intron):

LOCUS ENSG00000081237

DESCRIPTION Leukocyte common antigen precursor (EC 3.1.3.48) (L-CA) (T200)  
CD45 antigen). [Source:Uniprot/SWISSPROT;Acc:P08575]

TTTTTTTTGTAACTCCCTTAAAGATTCTTTGATGCTTTGCTCTATTACTGTGGGCCTGGTCTTTTTTTCCCCCCCAGTT  
TTTTCTTCTTTAAACTCTGG

In100 candidate4256 (in intron):

LOCUS ENSG00000118200

DESCRIPTION calmodulin regulated spectrin-associated protein 1-like 1

[Source:RefSeq\_peptide;Acc:NP\_982284]

AACTCTGTCTCAAAAAAAAAAAAAAAAAAGCTCATTTATGTACTTGAATAACTTCTTGGTAAATTTCTGCATATCAGATATT  
TTCGTTTATTTGATAGCTTT

In100 candidate4257 (in intron):

LOCUS ENSG00000118200

DESCRIPTION calmodulin regulated spectrin-associated protein 1-like 1

[Source:RefSeq\_peptide;Acc:NP\_982284]

CTAAATGAAGTGCCTCTATCAACCCCTTGTTTTCTATACCCTAACACTCTACTTTTTTTCTTTCATAGCACTTTTCAGAC  
TAATTACTTTTCTTAATCAT

In100 candidate4258 (in intron):

LOCUS ENSG00000118200

DESCRIPTION calmodulin regulated spectrin-associated protein 1-like 1

[Source:RefSeq\_peptide;Acc:NP\_982284]

ATTAATGCTGATGCTTTTCTGAGAGATAGCATTGAAAAGAAATCTAACTTCACTACCAAATGTTGTGTTCTCTTTCAGTA  
AATTTTTATTTTCTATTTT

In100 candidate4259 (in intron):

LOCUS ENSG00000118200

DESCRIPTION calmodulin regulated spectrin-associated protein 1-like 1

[Source:RefSeq\_peptide;Acc:NP\_982284]

AATTTGAAGTCTTATGATGTGGAACCTTTAGCTTTAACTGTCCATTTCTTTTCTTTGCATCTTTTATCGTTATCCCAGCT  
TTTATTCCCTTTTAGATTCT

In100 candidate4260 (in exon):

LOCUS ENSG00000118200

DESCRIPTION calmodulin regulated spectrin-associated protein 1-like 1

[Source:RefSeq\_peptide;Acc:NP\_982284]

AAATATGGTTAAGATTACAAATTATGTGTTTTATTTGTTGCTTTTTTTTAAACCTTTTAATGTATATTCTTGTCTTCAGAT  
GGTTTGCTATTTTTCTCTCC

In100 candidate4261 (in intron):

LOCUS ENSG00000116852

DESCRIPTION Kinesin family member 21B. [Source:Uniprot/SWISSPROT;Acc:O75037]

AGTTCCTTGGGTCTTTTCCTTTGGACCTGTTTGTAACCGTTCTTACATTCTATCTTCATTATGCTGCTCTTCAGCCCATT  
CATTCCATTTTTTATTCATT

In100 candidate4262 (in intron):

LOCUS ENSG00000134369

DESCRIPTION neuron navigator 1 [Source:RefSeq\_peptide;Acc:NP\_065176]

AAATATTAGTTAATACTGATGTCTGCAACGCTAACCTAATAGCACGTGGTTCATTCTAACTTTCTTCCTTTATGCAGCC  
TTTTTTTTTTTTTTTTTTAGA

In100 candidate4263 (in intron):



LOCUS ENSG00000134369

DESCRIPTION neuron navigator 1 [Source:RefSeq\_peptide;Acc:NP\_065176]

AGGGTGGAAAGCCTTTGTCTCTGCTTGTTAACATCACTGCACCTCATTTTCCTTCCAAATCTTATACAGCTTCTGCAGCC

AGTAGTTTGTATTTCTCTTC

In100 candidate4264 (in intron):

LOCUS ENSG00000077157

DESCRIPTION Protein phosphatase 1 regulatory subunit 12B (Myosin

phosphatase targeting

subunit 2) (Myosin phosphatase target subunit 2).

[Source:Uniprot/SWISSPROT;Acc:O60237]

AGAGTCAAATCTCTCATATCCTGTAACCTTGCTGCATGCTCCTTAGTTTTTTCTTTATCTACACATATATCTGGTCAGTT

TGATACATTTTTTTCTTTTT

In100 candidate4265 (in intron):

LOCUS ENSG00000077157

DESCRIPTION Protein phosphatase 1 regulatory subunit 12B (Myosin

phosphatase targeting

subunit 2) (Myosin phosphatase target subunit 2).

[Source:Uniprot/SWISSPROT;Acc:O60237]

TTCCTGCCTCTCTCCCTCATGCTGATAACTTCCAAATTCTTTCACCTTGATCTGCTTATACTCACTTGTCAGATTGAGTC

ACTTTCATCATTCATGTCTT

In100 candidate4266 (in intron):

LOCUS ENSG00000143858

DESCRIPTION Synaptotagmin-2 (Synaptotagmin II) (SytII).

[Source:Uniprot/SWISPROT;Acc:Q8N9I0]

CCTCTTTTACCCTTTATTCTGCTTCTGCCAAGTTTAAACCACTGTGTTCTGGATTATTTCTTCTGATCTGCTTCCAGTT  
CATTAATGTCTTCTTCAGCT

In100 candidate4267 (in intron):

LOCUS ENSG00000117139

DESCRIPTION Jumonji, AT rich interactive domain 1B (RBP2-like)

[Source:RefSeq\_peptide;Acc:NP\_006609]

GGAGTCGGTTGGTGGGTGGAGGTTAGTCTCTGCTAACATCACTTCATTTCTTTATCTGTTTCATTTTTGTATTGGCCAGAC  
TTTATCTGAACTTTCTTTTC

In100 candidate4268 (in exon):

LOCUS ENSG00000117153

DESCRIPTION Kelch-like protein 12 (CUL3-interacting protein 1).

[Source:Unirot/SWISSPROT;Acc:Q53G59]

TGGGAATGTGATAACCTAAACAACCTTTGCTCTGAAATTCATTTTTCCCTCTTCCCTGAGTTGTATTGACCTACAGAG  
TTAATTTCCCTTTGTATTTTT

In100 candidate4269 (in intron):

LOCUS ENSG00000163444

DESCRIPTION Transmembrane protein 183A. [Source:Uniprot/SWISSPROT;Acc:Q8IXX]

AGGCACTTAACCATAATTCATATTTTACTTCCTTATTCTACTTTACCTCCATTAGGTTTCTCCATTCCATCAGACTGGTC  
TTTTTTTTTTTTTTTTCTTTT

In100 candidate4270 (in intron):

LOCUS ENSG00000117222

DESCRIPTION Retinoblastoma-binding protein 5 (RBBP-5) (Retinoblastoma-binding protein RBQ-3). [Source:Uniprot/SWISSPROT;Acc:Q15291]

AACTCTATTGAACTTTCTGTTGCATTTTCTATTATTTATTTGAGATAACATTTTCTTTTGCTTTTCTTACTTTCAGCT  
CAGTTTCTGTTTTACATCTT

In100 candidate4271 (in intron):

LOCUS ENSG00000186007

DESCRIPTION LEM domain containing 1 [Source:RefSeq\_peptide;Acc:NP\_001001552

CCATGGCAACCACTAACCTGAATTTTCTACTTATCCTTCTTCCCTTTTCTTTATAGCATCCACAACTTTAGTTCAGTT  
TTTCATGATTTTGTATTTCA

In100 candidate4272 (in intron):

LOCUS ENSG00000203710

DESCRIPTION Complement receptor type 1 precursor (C3b/C4b receptor) (CD35 antigen). [Source:Uniprot/SWISSPROT;Acc:P17927]

AGATAATGTGAAGCCTTAACAATTTGCTTTCTTCTCTTTCTTTTGTTTCTTTTTTCTCTTCCTTCCTTTCTTCAGTT  
CTTCTTCCCTTCTCTTTCT

In100 candidate4273 (in intron):

LOCUS ENSG00000203710

DESCRIPTION Complement receptor type 1 precursor (C3b/C4b receptor) (CD35 antigen). [Source:Uniprot/SWISSPROT;Acc:P17927]

AGATAATGTGAAGCCTTAACAATTTGCTTTCTTCTCTCTTTCTTTTGTTTCTTTTTTCTCTTCCTTCCTTTCTTCAGTTCTTTCTTCCCTTCTCTTTCT

In100 candidate4274 (in intron):

LOCUS ENSG00000203710

DESCRIPTION Complement receptor type 1 precursor (C3b/C4b receptor) (CD35 antigen). [Source:Uniprot/SWISSPROT;Acc:P17927]

CTGCTGCATGGGCTAAGTAACCAAAAAGACTCTCTTTGTCTTGACTTAAAGTTGTCCACTTGTCATCTTGCCCTCCAGGCTGTCTTAATCTTTGTACTTG

In100 candidate4275 (in intron):

LOCUS ENSG00000076356

DESCRIPTION Plexin-A2 precursor (Semaphorin receptor OCT). [Source:Uniprot/WISSPROT;Acc:O75051]

AATCTCCCTCTTTCACTACCATGGAGTCCCCACAATAACACGTTGCCCATTTTTCATCCTTAAGTCATCTGCCAGTTGCATCTATTTCTAGCCTCTGT

In100 candidate4276 (in intron):

LOCUS ENSG00000076356

DESCRIPTION Plexin-A2 precursor (Semaphorin receptor OCT). [Source:Uniprot/WISSPROT;Acc:O75051]

TCACCCCCTCTCTGATTAATCCCACCCCCTCTAATCACCACTTAACTCCACATGCCCTTGTCTGGCTCCAGCTTAATTTTCACATCTCAGTATCTGCCT

In100 candidate4277 (in intron):

LOCUS ENSG00000143469

DESCRIPTION Synaptotagmin-14 (Synaptotagmin XIV) (SytXIV).

[Source:Uniprot/WISSPROT;Acc:Q8NB59]

CTATCTACTTTTCATTTTTCTTTTACTTAGATTTATACTTTAACTTCTTGAGCTGGATGCTTACTTCATTGTTTTTCAGTC  
TTTTTTGGTTTCTAACATGT

In100 candidate4278 (in intron):

LOCUS ENSG00000054392

DESCRIPTION Protein-cysteine N-palmitoyltransferase HHAT (EC 2.3.1.-)

(Hedghog acyltransferase) (Skinny hedgehog protein 1) (Melanoma antigen  
recognizd by T-cells 2) (MART-2). [Source:Uniprot/SWISSPROT;Acc:Q5VTY9]

TTCATAATTTTACTCCCCGATATTAACATTTTATTGTATTTTCCTTCTCATTTTTTGTTCCATGCATATTTTGCACAGGT  
TATTTCTTGTTTCATGCTCT

In100 candidate4279 (in intron):

LOCUS ENSG00000143473

DESCRIPTION Potassium voltage-gated channel subfamily H member 1 (Voltagegated  
potassium channel subunit Kv10.1) (Ether-a-go-go potassium channel 1)  
(EAG1) (h-eag). [Source:Uniprot/SWISSPROT;Acc:095259]

AACTAGTCATATTTATGTGTGTAGAGTTGTTTGTAACATTACCTTATTTTTATTTTTTTTTATGTCTCCAGGGTTTATAG  
TGATATTCTCTTTTCCATTC

In100 candidate4280 (in intron):

LOCUS ENSG00000143473

DESCRIPTION Potassium voltage-gated channel subfamily H member 1 (Voltagegated  
potassium channel subunit Kv10.1) (Ether-a-go-go potassium channel 1)  
(EAG1) (h-eag). [Source:Uniprot/SWISSPROT;Acc:O95259]

CTCCCACTCTGTGGGTTGTCTATTAAGTCTGCTGCTTATTTCTTTTGCTGTGCAGAAGCTTTTATGTTTAATTAAGTCCC  
ACCTATTTATCTTTGTTTTT

In100 candidate4281 (in intron):

LOCUS ENSG00000117625

DESCRIPTION REST corepressor 3. [Source:Uniprot/SWISSPROT;Acc:Q9P2K3]

CAAGCTTCTAACATTCTCAAAGTTTACATTGTTTCCTTTTTGTCTTTGAAGTCATTTCCATGCATTTTCTCCACAGAATTT  
TATCATATATAATTTTTTTT

In100 candidate4282 (in intron):

LOCUS ENSG00000143493

DESCRIPTION Integrator complex subunit 7 (Int7).

[Source:Uniprot/SWISSPROT;cc:Q9NVH2]

ATCATTATCATTATGATTAAGTCTATTTTGGCTAGTCTTTATTTTCATTCAGACCTCGGTATTTACCTCTCTACATTT  
CTGTACCTGTTTTACTTCTT

In100 candidate4283 (in intron):

LOCUS ENSG00000143493

DESCRIPTION Integrator complex subunit 7 (Int7).

[Source:Uniprot/SWISSPROT;cc:Q9NVH2]

TGATAACCCTTCTCCCGTTAATCCCTCATGTTTCCTTATCTTGTTTTCTATTTTCTATCTCTTTGTGCTAAGTTCTCAGTA  
ATTTCTTCTTATATATGTTT

In100 candidate4284 (in intron):

LOCUS ENSG00000065600

DESCRIPTION Transmembrane protein Clorf75.

[Source:Uniprot/SWISSPROT;Acc:Q9813]

ATAATTTCTCTCATTCTGTAGGTTGTCTCTTAACTTTGTTGATTGTTTCCTTTGCTGTACAGAAGCTTTTATAGCTTAATG  
TAATCCCATTTTTCTGTTTT

In100 candidate4285 (in intron):

LOCUS ENSG00000185523

DESCRIPTION HSD-44 (Hypothetical LOC149643).

[Source:Uniprot/SPTREMBL;Acc:Q37H7]

ATTTTGAGAACTTCATGGTGAACTTTTAACTAAGACATCTATGTTTTATTTGCAGTTCACCTATAAAATGGGCTTTTATT  
TTATTTTTATTTTATTTTTT

In100 candidate4286 (in intron):

LOCUS ENSG00000136643

DESCRIPTION Ribosomal protein S6 kinase delta-1 (EC 2.7.11.1) (52 kDa ribosomal protein S6 kinase) (Ribosomal S6 kinase-like protein with two PSK domains 118 kDa protein) (SPHK1-binding protein).

[Source:Uniprot/SWISSPROT;Acc:Q6S38]

TTGATTCCCTTTTAGTAACTTCTCATCCATCTACCTTTTTTTTTTTTAAATTATATTCCATGGCAGCTTTTATATTCTAA  
ATTTTGTTGCTGTTACCTTC

In100 candidate4287 (in intron):

LOCUS ENSG00000117724

DESCRIPTION centromere protein F (350/400kD)

[Source:RefSeq\_peptide;Acc:NP\_57427]

CAATTCATTGTTGAGAGAGAATGTTGGAGTCCCCACCTATAACTGTGATTTGTCTGTTTCTCCTTTGATTTCTTCCAGTT  
TTTGCTTCACATATTTTGCA

In100 candidate4288 (in intron):

LOCUS ENSG00000136636

DESCRIPTION BTB/POZ domain-containing protein KCTD3 (Renal carcinoma antigen NY- REN-45). [Source:Uniprot/SWISSPROT;Acc:Q9Y597]

TAGATCACTTTATATTAACCTGGGGTTGTGGGAGCCCTGATTTTTTATTTTCATTTTTTCTCCATTCTTCAGTTTAGATA  
TCTTTTATTGATCTACCTTT

In100 candidate4289 (in intron):

LOCUS ENSG00000136636

DESCRIPTION BTB/POZ domain-containing protein KCTD3 (Renal carcinoma antigen NY- REN-45). [Source:Uniprot/SWISSPROT;Acc:Q9Y597]

GTATAACATGTTTGCTTTCTTTCTTTCTGTCTTTTTAGTTTCATAGCTTCTTTTTAAATAATTGCTCATTCATCCATCAGGG



CTCTTTCTGCTTTTCTTTTG

In100 candidate4290 (in intron):

LOCUS ENSG00000042781

DESCRIPTION Usherin precursor (Usher syndrome type-2A protein) (Usher syndrme type IIa protein). [Source:Uniprot/SWISSPROT;Acc:075445]

AATTTTCGGGAACCTGACTACACTTAACCATTAATACTTATCTCTAGTTTTCCCTAGTCTTCACCTTATATTTAATCAGGT  
TGATCGTCTTACTAATTTCC

In100 candidate4291 (in intron):

LOCUS ENSG00000042781

DESCRIPTION Usherin precursor (Usher syndrome type-2A protein) (Usher syndrme type IIa protein). [Source:Uniprot/SWISSPROT;Acc:075445]

ATCAATTTCACTGTTTTCTCTAATTACATATTAACCCTGTGTTGGATTCCTGGATTTTCCAGGACAATTATATTATTTCCC  
TCTTTTCCCCATATCTAAGT

In100 candidate4292 (in intron):

LOCUS ENSG00000042781

DESCRIPTION Usherin precursor (Usher syndrome type-2A protein) (Usher syndrme type IIa protein). [Source:Uniprot/SWISSPROT;Acc:075445]

GTTGAATTAAGTGTCAAAATATCACTTAATTTTCATTCTCAGCTTATTTGCCATGTATTCATCTTAGTCTAAGCCCTTCT  
TTCAATAACTGTCTGCTCTT

In100 candidate4293 (in intron):

LOCUS ENSG00000196482

DESCRIPTION Estrogen-related receptor gamma (Estrogen receptor-related protein 3) (ERR gamma-2). [Source:Uniprot/SWISSPROT;Acc:P62508]

ATAGAAAATTAAAAAGAATTAATTCTAATGTAACCATCTTTTACTTGACTTTTTTTTTTTTTTTGCTCTGCTCACAGGT  
CTAATTGTTGTTATTCTCAC

In100 candidate4294 (in intron):

LOCUS ENSG00000196482

DESCRIPTION Estrogen-related receptor gamma (Estrogen receptor-related protein 3) (ERR gamma-2). [Source:Uniprot/SWISSPROT;Acc:P62508]

GAAGAAAGAGCGTTTCATTGCTTTATAAGTAACCTCAAACCCGCGCCTTTCCTTAGCCATTCCTTTCTTTTTGGTCAGCT  
GCGTTTTTATTTTTTTGGACC

In100 candidate4295 (in intron):

LOCUS ENSG00000143353

DESCRIPTION Lysophospholipase-like protein 1 (EC 3.1.2.-).  
[Source:Uniprot/WISSPROT;Acc:Q5VWZ2]

ATAAGTTATTAAACATTTATGAAAATAAATTTAACATTCACTTAAATATCTATTGCTGTTTCTTTTGGGTCTTCCAGAA  
TAATTTTTTCTTATTCTTTA

In100 candidate4296 (in intron):

LOCUS ENSG00000154309

DESCRIPTION dispatched A [Source:RefSeq\_peptide;Acc:NP\_116279]

ATGACTGTATAATTTTTATAACTTACATTTCTTTTCTTTATTTCATTTTCTAATTTCTGACTCATTTTTCTCAGAG  
GTTTTCTTTTTGTTTCCCCT

In100 candidate4297 (in intron):

LOCUS ENSG00000143786

DESCRIPTION Cornichon homolog 3. [Source:Uniprot/SWISSPROT;Acc:Q8TBE1]

GTTTCATCACCTTGTC AATACTTTATACTTGGTGTCACCTCTGTACCTGTAACATGCCATTATTTATTTTATTTGCAGTTC  
TACTTTTTTACCAGTCCATAT

In100 candidate4298 (in intron):

LOCUS ENSG00000154380

DESCRIPTION Protein enabled homolog. [Source:Uniprot/SWISSPROT;Acc:Q8N8S7]

EXON

AGTAACTGTTGTTACTAGCTGTTTCTAGCTCTGTCTCAGTCAGTACATTTGTGATTTTCTTTTTGTGATTTTTTTTTGTG  
ATTTTTTTCATAATTATATCT

In100 candidate4299 (in intron):

LOCUS ENSG00000183814

DESCRIPTION Lin-9 homolog (huLin-9) (hLin-9) (Beta-subunit associated  
regulator of apoptosis) (Type I interferon receptor beta chain-associated protein  
(TUDOR gene similar protein) (pRB-associated protein).  
[Source:Uniprot/SWISPROT;Acc:Q5TKA1]

GTAACTTCTAATTGTCTTTTAGATCCCATTTTATGCTTCTTCAGAGAGCCATTTCCCATCCTCCCTGACTAAATTATGT  
CTTCTTTAAATCTGTTTTTT

In100 candidate4300 (in intron):

LOCUS ENSG00000183814

DESCRIPTION Lin-9 homolog (huLin-9) (hLin-9) (Beta-subunit associated  
regulator of apoptosis) (Type I interferon receptor beta chain-associated protein  
(TUDOR gene similar protein) (pRB-associated protein).

[Source:Uniprot/SWISPROT;Acc:Q5TKA1]

AGCCTCTTCATGCCACCATAACTAGTAGTCCTTTTCTATGCTTATATTTGTTTACTCAGCTTCATTATTTACATCTTCTG  
TATCCATGTTTACTTTTCCC

In100 candidate4301 (in intron):

LOCUS ENSG00000143772

DESCRIPTION Inositol-trisphosphate 3-kinase B (EC 2.7.1.127) (Inositol 1,4,-  
trisphosphate 3-kinase B) (IP3K B) (IP3 3-kinase B) (IP3K-B).

[Source:Unirot/SWISSPROT;Acc:P27987]

GGGAGAGTGGCCTGAATGTGGGGAGCCTTTGAGTAACTGACCTATAACTTTTCTTAGGCCCTTCTGGTTTTATCCCAGTT  
ACTGATGCTGTTCTTATCTC

In100 candidate4302 (in intron):

LOCUS ENSG00000143776

DESCRIPTION Serine/threonine-protein kinase MRCK alpha (EC 2.7.11.1) (CDC42  
binding protein kinase alpha) (Myotonic dystrophy kinase-related CDC42-bining  
kinase alpha) (Myotonic dystrophy protein kinase-like alpha) (MRCK alph)  
(DMPKlike

alpha). [Source:Uniprot/SWISSPROT;Acc:Q5VT25]

AACACATGATAATCGTTCTTTTTGGCATTAAACACAAGTGACTTTTTGCCCTCTCATTGCATTTTCAGTTTTTAATGTACCT  
TTCATTGCTTTAATGTTTTTC

In100 candidate4303 (in intron):

LOCUS ENSG00000181450

DESCRIPTION Zinc finger protein 678. [Source:Uniprot/SWISSPROT;Acc:Q5SXM1]

EXON

CTTTTCTTTTTTTGTTTTGATGAGCTCTCACTTCCACTTAACAATTTCTCCCTGTCTCTTTCTAGTTCTTTCTTCCAGTT  
CTCATTCATTTTTTTTCTTCA

In100 candidate4304 (in intron):

LOCUS ENSG00000135776

DESCRIPTION ATP-binding cassette sub-family B member 10, mitochondrial  
precursor (ATP-binding cassette transporter 10) (ABC transporter 10 protein)  
(Mitochondrial ATP-binding cassette 2) (M-ABC2).

[Source:Uniprot/SWISSPROT;Acc:9NRK6]

CTCCCCTTTCGTAGGTAATGAGAATGTCTTGCCACCCAATGTAACAAACACCTCTGAATTTTTTTTTTGTGTTTTGACAGTT  
TTTTGTCTCACCTAATCTGG

In100 candidate4305 (in intron):

LOCUS ENSG00000143641

DESCRIPTION Polypeptide N-acetylgalactosaminyltransferase 2 (EC 2.4.1.41)  
(rotein-UDP acetylgalactosaminyltransferase 2) (UDP- GalNAc:polypeptide  
Nactylgalactosaminyltransferase  
2) (Polypeptide GalNAc transferase 2) (GalNAc-2)  
(pp-GaNTase 2) [Contains: Polypeptid [Source:Uniprot/SWISSPROT;Acc:Q1047]  
TACATTCTTGCTCTAAACTCTTTGATTCTGTAACTGTGTCTTACCATTTCCCTTTAATCTCTATTCTCAGATTGGAAT  
CACCAATTTTATTTTCTTTT

In100 candidate4306 (in intron):

LOCUS ENSG00000143641

DESCRIPTION Polypeptide N-acetylgalactosaminyltransferase 2 (EC 2.4.1.41)  
(rotein-UDP acetylgalactosaminyltransferase 2) (UDP- GalNAc:polypeptide  
Nactylgalactosaminyltransferase  
2) (Polypeptide GalNAc transferase 2) (GalNAc-2)  
(pp-GaNTase 2) [Contains: Polypeptid [Source:Uniprot/SWISSPROT;Acc:Q1047]  
GTTTCTTCTCTATTTGTACCATGTGCATTTTGCTTTTTGTAACTGTGTTCCTGCTTTCTTGCCCTTCTTTTGGATTTCAGTG  
ATTTTTTTTAGTATTCATTT

In100 candidate4307 (in intron):

LOCUS ENSG00000135775

DESCRIPTION Conserved oligomeric Golgi complex component 2 (Low density  
lipprotein receptor defect C-complementing protein).  
[Source:Uniprot/SWISSPROTAcc:Q14746]  
AGAAGAAAGCATTTTAATAACATTTTAAAGTCCTATACGTTTTTGTCTCCATATCAGGTATTCCACACTTTATATCTTGT  
TCCCTCTTTATTGTTACTGG

In100 candidate4308 (in intron):

LOCUS ENSG00000116906

DESCRIPTION Dihydroxyacetone phosphate acyltransferase (EC 2.3.1.42) (DHAP-T)  
(DAP-AT) (Glycerone-phosphate O-acyltransferase) (Acyl-CoA:dihydroxyaceonephosphateacyltransferase).

[Source:Uniprot/SWISSPROT;Acc:O15228]

TTTTTTTCTTCTAGGAAAGCTCTTAACTTCACTTGCCTTCCTCCTCATCCCTTTTAATATTTTGTTTTAATTCAGTCATT  
TACTTTCCTGTCAAATATTT

In100 candidate4309 (in intron):

LOCUS ENSG00000010072

DESCRIPTION DDDL1880 (Chromosome 1 open reading frame 124).

[Source:UniprotSPTREMBL;Acc:Q6UWW6]

TCATGATCTCTTAACTTTGTTTCCTTATTATTGTCTTTTTTAGTCCATCCTGTATCCTGCTACCATTGCAGATGTCATTC  
CCTCATCAGAATTCTTCTTT

In100 candidate4310 (in intron):

LOCUS ENSG00000162946

DESCRIPTION Disrupted in schizophrenia 1 protein.

[Source:Uniprot/SWISSPROTAcc:Q9NRI5]

AAAAATGGCTGTATGATATGTAACAATAAGTGTGGCTGATTCCAATTTTCTCCATTTGGTTGTTTCCAGTTATTTCTCAT  
GCTGCAATGATCATCCTTTT

In100 candidate4311 (in intron):

LOCUS ENSG00000116991

DESCRIPTION Signal-induced proliferation-associated 1-like protein 2.

[Source:Uniprot/SWISSPROT;Acc:Q9P2F8]

TACCTGGTCCAACTAACTGGTCAACTGCCCTCTCTTTTTTTGATAAGAATATGTATTCTTCCCTTTGAACCTTCTCAGTT  
CTCTAGGTTTTTTGGTTTTG

In100 candidate4312 (in intron):

LOCUS ENSG00000135749

DESCRIPTION pecanex-like 2 [Source:RefSeq\_peptide;Acc:NP\_079214]

AAAATCACAAATCTGACTTTGTTTGTTTTAAATAACTTTTTATTTGTAACCTCATTATTCCTCATCTTATTTTTGCCAGTT  
TCCATTATCTAGTTTGCTTT

In100 candidate4313 (in intron):

LOCUS ENSG00000183780

DESCRIPTION solute carrier family 35, member F3

[Source:RefSeq\_peptide;Acc:P\_775779]

ATCCCAATAACTTTTCCTATACTTTCTTTTCATTTTGCTTGATTTTTCATTTCTAACCTCTGTCATTTATGATGTCAGCA  
GTGGTTATTCTTCCTTCTGT

In100 candidate4314 (in intron):

LOCUS ENSG00000183780

DESCRIPTION solute carrier family 35, member F3

[Source:RefSeq\_peptide;Acc:P\_775779]

CTGTTGCTTACTTCTAAAATTATATGGACTTCTCTGTCTCTTATAACTTTTTCTCCATTTTCTCTGTTCTTGTGCAGTT  
TTGTCCTCGTTATCCTTTAC

In100 candidate4315 (in intron):



LOCUS ENSG00000183780

DESCRIPTION solute carrier family 35, member F3

[Source:RefSeq\_peptide;Acc:P\_775779]

TTTTCTTTCTTTTTTGTTCATGATTTTTTTAATGATACCTTAACTAGTTGTAGGATTCTCTGTTGACAGGTTTTTTTAAATATGTTATCACACTGCCCTT

In100 candidate4316 (in intron):

LOCUS ENSG00000059588

DESCRIPTION Probable methyltransferase TARBP1 (EC 2.1.1.-) (TAR RNA binding protein

1) (TAR RNA-binding protein of 185 kDa) (TRP-185).

[Source:Uniprot/WISSPROT;Acc:Q13395]

TAATCACTCTTTGGTATGAATATATCTTTTTAACTGGTTTCCATTCTTATTCTCTTAGTATATCTTTTCCAGTGTTTCTTAAGTTTTTCAGTTATTGTTCT

In100 candidate4317 (in intron):

LOCUS ENSG00000054267

DESCRIPTION AT rich interactive domain 4B isoform 2

[Source:RefSeq\_peptide;cc:NP\_112739]

CCTGTTAGTTCAACAATGAGTATCATATTTGCATACTTTTAACATTTTAAGTATTCTCTTCATATTTTCTTTTTTCAGTAATTTTATTTTTTATCTTTG

In100 candidate4318 (in intron):

LOCUS ENSG00000116962

DESCRIPTION Nidogen-1 precursor (Entactin).

[Source:Uniprot/SWISSPROT;Acc:P4543]

ACTTATTAATTTTAGGGGATGTTATTAAGTTCTAAAGTGTGTTTGGATTTCTTTTAAATCCCATCACCCCAGGGGTGGTG  
TGTCTTTGCTTCTTTGTTTC

In100 candidate4319 (in intron):

LOCUS ENSG00000077585

DESCRIPTION Integral membrane protein GPR137B (Transmembrane 7 superfamily  
member 1). [Source:Uniprot/SWISSPROT;Acc:O60478]

CTTTTAAAATTCTTTCCTTTGTCTTGACTTTAGATAACCTGACTGTGCCTGATCATCTTTTTGCAATTATTTTCCCAGGT  
GTTCTTTGAGCTTCTTGAT

In100 candidate4320 (in intron):

LOCUS ENSG00000086619

DESCRIPTION ERO1-like protein beta precursor (EC 1.8.4.-) (ERO1-Lbeta)  
(Oxio-reductin-1-Lbeta) (Endoplasmic oxidoreductin-1-like protein B).

[Source:Unprot/SWISSPROT;Acc:Q86YB8]

TGCTACATTTTAGACTTTGATTTTGTGTTATCTAACATAATTAATTATATTCCTCTTCTTCAACAGTAATTAGTTGTAAGC  
TTTGTTTTCTTTCACTTTC

In100 candidate4321 (in intron):

LOCUS ENSG00000186197

DESCRIPTION Ectodysplasin A receptor-associated adapter protein (EDAR-associated  
death domain protein) (Crinkled homolog).

[Source:Uniprot/SWISSPROT;Ac:Q8WWZ3]

CCTTGCTTTTAACTGTCCTGTGTGTGTCCTCAATGATGCTTTTTTGTGGCTCTGCCTTTCCCAGCGATCTACTGCATTT  
TCCTCTCCTTCCTTTCTTTT

In100 candidate4322 (in intron):

LOCUS ENSG00000198626

DESCRIPTION Ryanodine receptor 2 (Cardiac muscle-type ryanodine receptor)  
(yR2) (RYR-2) (Cardiac muscle ryanodine receptor-calcium release channel) (hYR-  
2). [Source:Uniprot/SWISSPROT;Acc:Q92736]

AACCCCTATTAAGTATGAAAAGATTTTCTGATTCCCAGTCTCATTTTTTCTATTTTCTTTCTTCTTGCTCTCTTT  
TTTCTAACTTTATAAGATGA

In100 candidate4323 (in intron):

LOCUS ENSG00000198626

DESCRIPTION Ryanodine receptor 2 (Cardiac muscle-type ryanodine receptor)  
(yR2) (RYR-2) (Cardiac muscle ryanodine receptor-calcium release channel) (hYR-  
2). [Source:Uniprot/SWISSPROT;Acc:Q92736]

AAAGCAAAAAAAAAAGAATATTAAGTTTGAATTCACATTATCATTTCTTTTTGGTTACTCCTATACTGTCATTGCCAGAT  
TTCATCAGTTTCCCTTTGAA

In100 candidate4324 (in intron):

LOCUS ENSG00000155816

DESCRIPTION Formin-2. [Source:Uniprot/SWISSPROT;Acc:Q9NZ56]

TCTTCTAAATAAGATGAATGTTTTAGAACATTCTAACTAACAATTGAACTCCTTCTACTTTCTTTTCAGTTTTTTTCCAG  
ACTTTGGGTACTGTCATTTT

In100 candidate4325 (in intron):

LOCUS ENSG00000180875

DESCRIPTION Gremlin-2 precursor (Cysteine knot superfamily 1, BMP antagonis  
2) (Protein related to DAN and cerberus) (DAN domain family member 3).

[Sorce:Uniprot/SWISSPROT;Acc:Q9H772]

AGTAGCCTCCTAACTAGTCTCCTGCATTTTAGCTTTTCCTCATTTTCAGTTCATCTTCCATAGTATTGCATTTTTTTTTTTT  
TTTTTTTTTTTTGAGATGGAG

In100 candidate4326 (in intron):

LOCUS ENSG00000182901

DESCRIPTION Regulator of G-protein signaling 7 (RGS7).

[Source:Uniprot/SWISPROT;Acc:P49802]

TTTGAACAAGTCCATTATAACTTTCTTTGATATTACCTTTTTTAATTTTATTCCTAGCAGTTATTACAGCCTGAAATTTTC  
TTTTGTTTGTTCATTTGTTT

In100 candidate4327 (in intron):

LOCUS ENSG00000182901

DESCRIPTION Regulator of G-protein signaling 7 (RGS7).

[Source:Uniprot/SWISPROT;Acc:P49802]

GCTTATTTGGTCTGTCAATTAATGAAAAAGTGGTGTGTAAGTTTGTAAGTGTAAATAATGAGTTTATTTTTCCTTTCAGTT  
CTCTCTAGTTTTGCCTTATG

In100 candidate4328 (in intron):

LOCUS ENSG00000117009

DESCRIPTION Kynurenine 3-monooxygenase (EC 1.14.13.9) (Kynurenine 3-hydroxyase). [Source:Uniprot/SWISSPROT;Acc:O15229]

TCCAAAGGATATATCTAACCTTTTTTAGGTTTACTATTATCTTTTTGGTTACAGAGGCCACTTTATAGCGCTTGACTTG  
TTTATTCTTATTTATTCTTC

In100 candidate4329 (in intron):

LOCUS ENSG00000174371

DESCRIPTION Exonuclease 1 (EC 3.1.--) (hExo1) (Exonuclease I) (hExoI).  
[Source:Uniprot/SWISSPROT;Acc:Q9UQ84]

AGACCCTGTCTCCAAAAAATAAAATGATTACTTTTGTAAC TTGTAGGATTCTTTTTTCCTCTGGCTGTGTAGCAGTATTT  
CTTTTCTCCAAATTTTATAA

In100 candidate4330 (in intron):

LOCUS ENSG00000054282

DESCRIPTION Serologically defined colon cancer antigen 8 (Centrosomal  
coloncancer autoantigen protein) (hCCCAP) (Antigen NY-CO-8).  
[Source:Uniprot/SWISPROT;Acc:Q86SQ7]

TATGCTGTGATATGTTTTCTGCATTTTGGGTAAC TGTTTAAAGATAATTTTTCTTTGGTAATCTTTTATCTACCAGCT  
TTTATACTTTT TAGATTTT

In100 candidate4331 (in intron):

LOCUS ENSG00000054282

DESCRIPTION Serologically defined colon cancer antigen 8 (Centrosomal coloncancer autoantigen protein) (hCCCAP) (Antigen NY-CO-8).

[Source:Uniprot/SWISPROT;Acc:Q86SQ7]

GGTCAAAAAGCCAAACTCATTATCTGTTTATTTGAAGAGGATATTATAACATTGATGTATATTCTTGCTATTTTACAGTG  
AACTTTATCTTTTTTTTTCCT

In100 candidate4332 (in intron):

LOCUS ENSG00000117020

DESCRIPTION RAC-gamma serine/threonine-protein kinase (EC 2.7.11.1) (RACPKgamma) (Protein kinase Akt-3) (Protein kinase B, gamma) (PKB gamma) (STK-2)

[Source:Uniprot/SWISSPROT;Acc:Q9Y243]

TCTGGTTCTTCTTAGTGGAATAAGTATTAACCTTTCCTTTATTTTAAATTCTTTTATTTACCTTTGTTCTTCATGCAGTA  
TTTTTCTTTCCTTATCCTG

In100 candidate4333 (in intron):

LOCUS ENSG00000117020

DESCRIPTION RAC-gamma serine/threonine-protein kinase (EC 2.7.11.1) (RACPKgamma) (Protein kinase Akt-3) (Protein kinase B, gamma) (PKB gamma) (STK-2)

[Source:Uniprot/SWISSPROT;Acc:Q9Y243]

ACCCTTGTTGAATTCTGGTGTAGTATCAAAGAATGATATCCATAACTATCTGAATATTTTTCCTTTTTCAGCTTCATAT  
CTCTTTGAGCCAGATTTTTT

In100 candidate4334 (in intron):

LOCUS ENSG00000117020

DESCRIPTION RAC-gamma serine/threonine-protein kinase (EC 2.7.11.1) (RACPKgamma)  
(Protein kinase Akt-3) (Protein kinase B, gamma) (PKB gamma) (STK-2)  
[Source:Uniprot/SWISSPROT;Acc:Q9Y243]

AAAATTCATGCTCTTGTCATGTTAGTAAAGATCCTAACCAATCTGATCTCATCTTTTTTTTCCAGAAGTCCTATTATTTCTCTGATTATATATTATTTTT

In100 candidate4335 (in intron):

LOCUS ENSG00000035687

DESCRIPTION Adenylosuccinate synthetase isozyme 2 (EC 6.3.4.4)  
(Adenylosuccinate synthetase, acidic isozyme) (IMP--aspartate ligase 2) (AdSS 2)  
(AMPSas 2). [Source:Uniprot/SWISSPROT;Acc:P30520]

TATTGATTTTGTGGGTTTTTGATTTTTTTTTTCCCCAAAAATAACCATTTTCTCTATTTTCTGTTTCACTGGGTTTCAGCTCTTTCTCTTCTTTCTACTTT

In100 candidate4336 (in intron):

LOCUS ENSG00000203666

DESCRIPTION EF-hand calcium-binding domain-containing protein 2.  
[Source:Uniprot/SWISSPROT;Acc:Q5VUJ9]

CCACTAACCAACATTTTCTCATTTTTTTTCTCCATCCTTGAATTCTTTGATTTATTTTTGTGTGTTGATTCTCTTGTCAGTTTTTTTTTTTTTTTCAGGAAG

In100 candidate4337 (in intron):

LOCUS ENSG00000203666

DESCRIPTION EF-hand calcium-binding domain-containing protein 2.

[Source:Unprot/SWISSPROT;Acc:Q5VUJ9]

GTGACTCCACATCACCTGGTAATCTAACATGCTGGTGATTCTACTCACCTGCTTTTATTTCTTCTTTTCCAGATTCTTCC  
TATTTTGCTCCCGACTGATT

In100 candidate4338 (in intron):

LOCUS ENSG00000185420

DESCRIPTION SET and MYND domain-containing protein 3 (EC 2.1.1.43) (Zinc  
finger MYND domain-containing protein 1). [Source:Uniprot/SWISSPROT;Acc:Q9H7B4  
AGTATATTTCTTTATCATTAGATTCTTTCATTTTCTTATTTTCTGTGTAACACTTTTACTTTGTTTTCTCTTTTCAGTA  
GTCTTTTTTTTATTATTTTAT

In100 candidate4339 (in intron):

LOCUS ENSG00000185420

DESCRIPTION SET and MYND domain-containing protein 3 (EC 2.1.1.43) (Zinc  
finger MYND domain-containing protein 1). [Source:Uniprot/SWISSPROT;Acc:Q9H7B4  
TTCTCTGCATTAGTAACGTACTGGTTAAATCTACACATGTGGTAAACTTTTTTTTTTTTTTTTCATTCTCACTTACCAGGA  
AATTCTATTTTCTTTTACCC

In100 candidate4340 (in intron):

LOCUS ENSG00000206368

DESCRIPTION Baculoviral IAP repeat-containing 1 variant (Fragment).

[SourceUniprot/SPTREMBL;Acc:Q59GI6]

TTTTAAAGATGTTACACTTTGCTGTGAGAGATGTAGCTGACATAACTAAATTTTATTTTCCCTTTCATAGTTGCCAGTT  
TGCCAAATTTTATTTCTCTG



In100 candidate4341 (in intron):

LOCUS ENSG00000206374

DESCRIPTION coiled-coil domain containing 125

[Source:RefSeq\_peptide;Acc:NP789786]

GATGCCTGAATTTATGTGGTGCATTGAAAAATATTCTTAGCTAACTCTACAATTGCTTACTCTTTCCTTTTACAGCTTTT  
CCCCCTTATATTGACCAATT

In100 candidate4342 (in intron):

LOCUS ENSG00000206374

DESCRIPTION coiled-coil domain containing 125

[Source:RefSeq\_peptide;Acc:NP789786]

ACCATGTCCAAACTGATGTAACTTTTTACATATTTTATTTATTTATTTGTTTATTTATTTATTTATTTTCACACAGGGT  
CTTGCTCTGTTGCCCAGTTT

total exon length=65661947

total intron length=1068751168

exonlocation = 65; intronlocation = 4277
