# Supplementary material for: An Intronic Signal for Alternative Splicing in the Human Genome
Source: PLOS journal article supplement (doi:10.1371/journal.pone.0001246), 2007-11-27
Supplement: S6 (10.1371/journal.pone.0001246.s006) [file journal.pone.0001246.s006.pdf › journal.pone.0001246.s006.pdf]

\*Experimental group: In100\_containing triplets: Exon1-In100-Exon2-Exon3

\*Control group: In100\_lacking triplets: Exon1-Exon2-Exon3. They are the exon triplets in the same gene sets as the In100\_containing triplets and don't overlap with any exon in In100\_containing triplets.

The num of exon triplets/genes in In100\_containing triplets and In100\_lacking triplets are summarized into 4 categories:

a)Only covering E1-E3 refers to: the triplets/ genes only have the ESTs which cover E1-E3

b)Covering E1-E3 and E1-E2-E3 refers to: the triplets/ genes have two types of ESTs: one covering E1-E3 and the other covering E1-E2-E3

c)Only covering E1-E2-E3 refers to: the triplets/ genes only have the ESTs which cover E1-E2-E3

d)= a) + b) = skipping events refers to: the union of the triplets/genes from group a) and group b)

|                                | <b>In100_containing tri</b> |              | <b>In100_lacking tri</b> |              |
|--------------------------------|-----------------------------|--------------|--------------------------|--------------|
|                                | <b>Triplets</b>             | <b>Genes</b> | <b>Triplets</b>          | <b>Genes</b> |
| a) Only converging E1-E3       | 129 (8.8%)                  | 128 (10%)    | 1017 (6.4%)              | 742 (36%)    |
| b) Covering E1-E3 and E1-E2-E3 | 395 (27%)                   | 362 (28%)    | 3099 (19.4%)             | 1182 (58%)   |
| c) Only covering E1-E2-E3      | 946 (64%)                   | 831 (66%)    | 11827 (74%)              | 1866 (92%)   |
| d) = a) + b) = skipping events | 524 (36%)                   | 482 (38%)    | 4116 (26%)               | 1490 (73%)   |
| Total = a) + b) + c)           | 1470                        | 1252         | 15943                    | 2036         |
