# Supplementary material for: An Intronic Signal for Alternative Splicing in the Human Genome
Source: PLOS journal article supplement (doi:10.1371/journal.pone.0001246), 2007-11-27

**A**

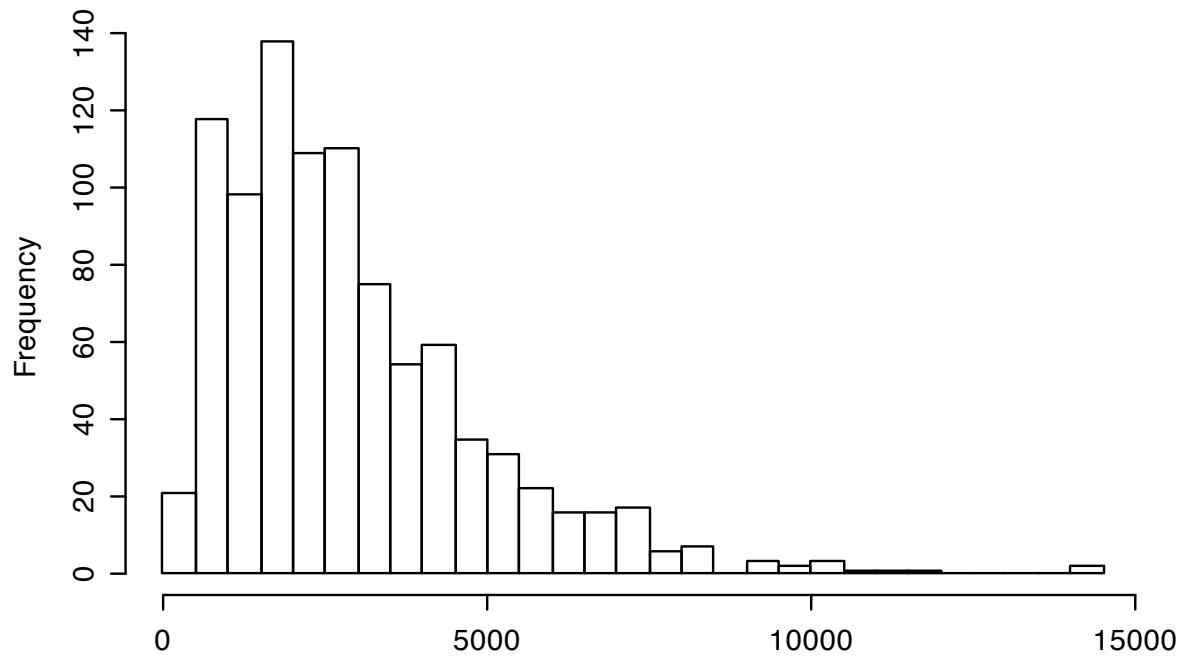

**B**

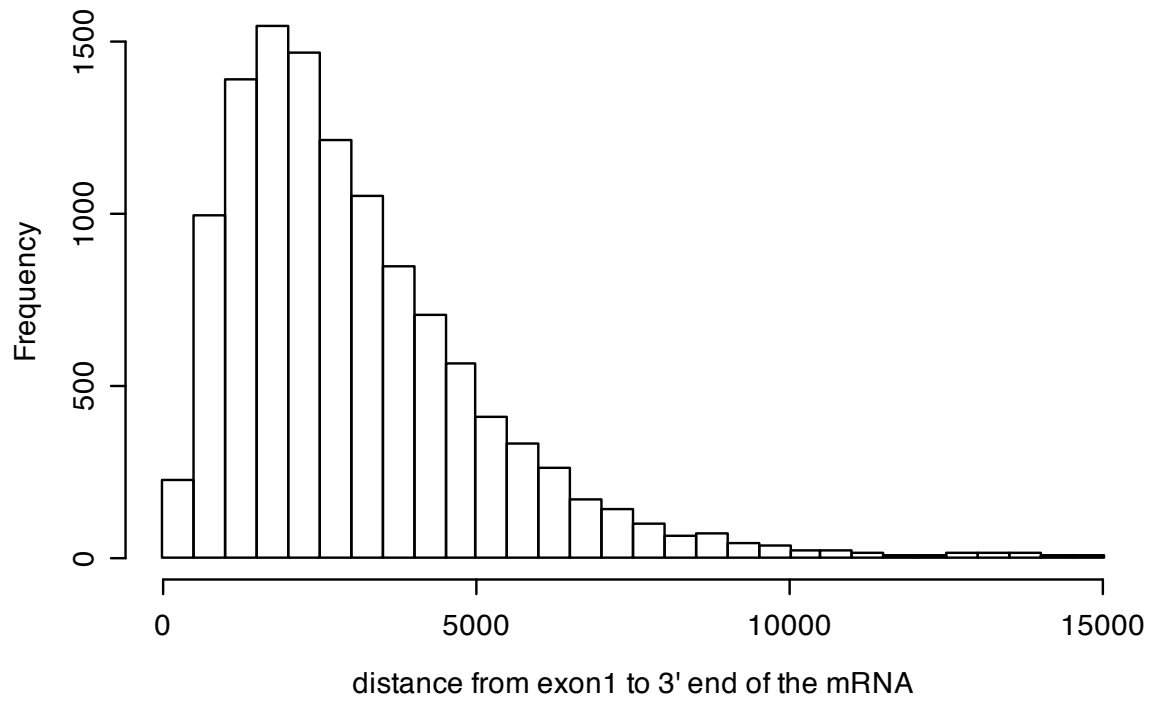

Supplement: S8 (10.1371/journal.pone.0001246.s008) [file journal.pone.0001246.s008.pdf › journal.pone.0001246.s008.pdf]
