# Supplementary material for: An Intronic Signal for Alternative Splicing in the Human Genome
Source: PLOS journal article supplement (doi:10.1371/journal.pone.0001246), 2007-11-27

Histogram of Frequency of In100-elements

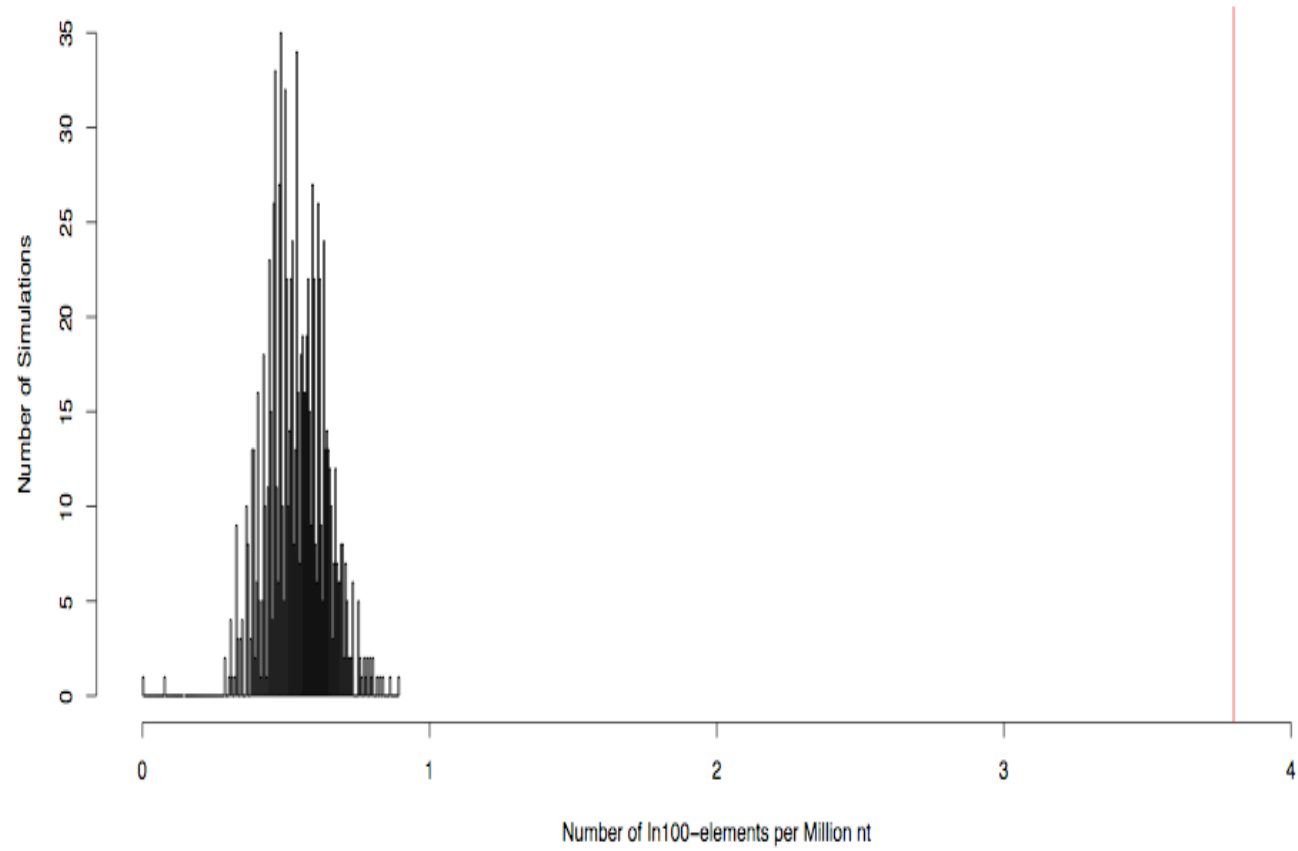

Supplement: S9 (10.1371/journal.pone.0001246.s009) [file journal.pone.0001246.s009.pdf › journal.pone.0001246.s009.pdf]
